# Supplementary material for: The context-dependent epigenetic and organogenesis programs determine 3D vs. 2D cellular fitness of MYC-driven murine liver cancer cells
Source: eLife journal article supplement (doi:10.7554/elife.101299), 2025-01-06
Supplement: fig3-data1 [file elife-101299-fig3-data1-v1.zip]

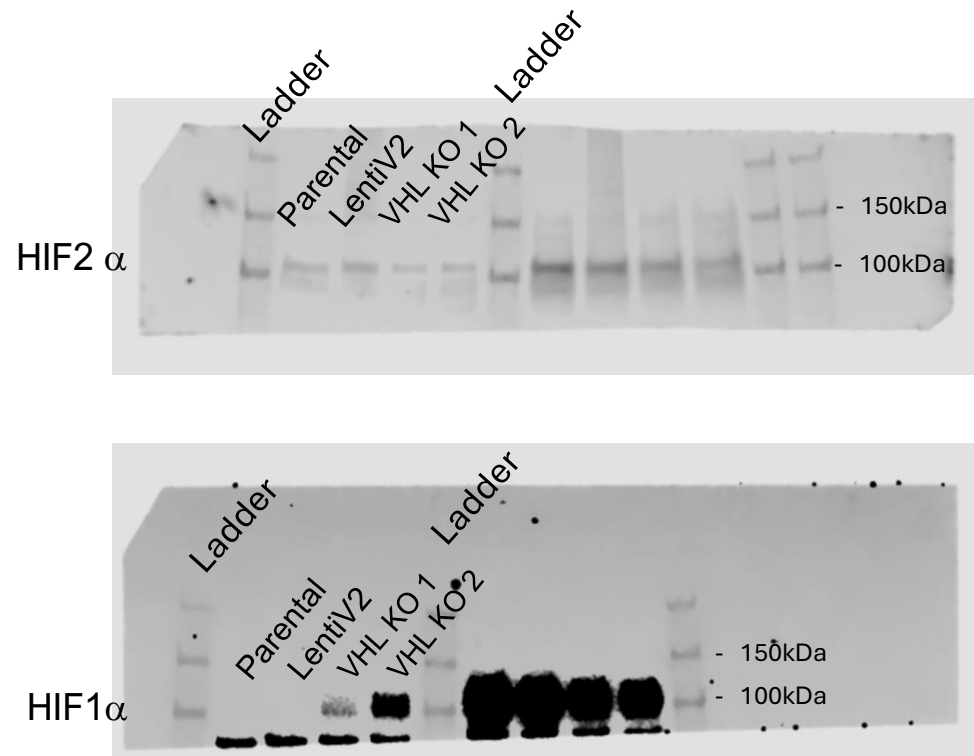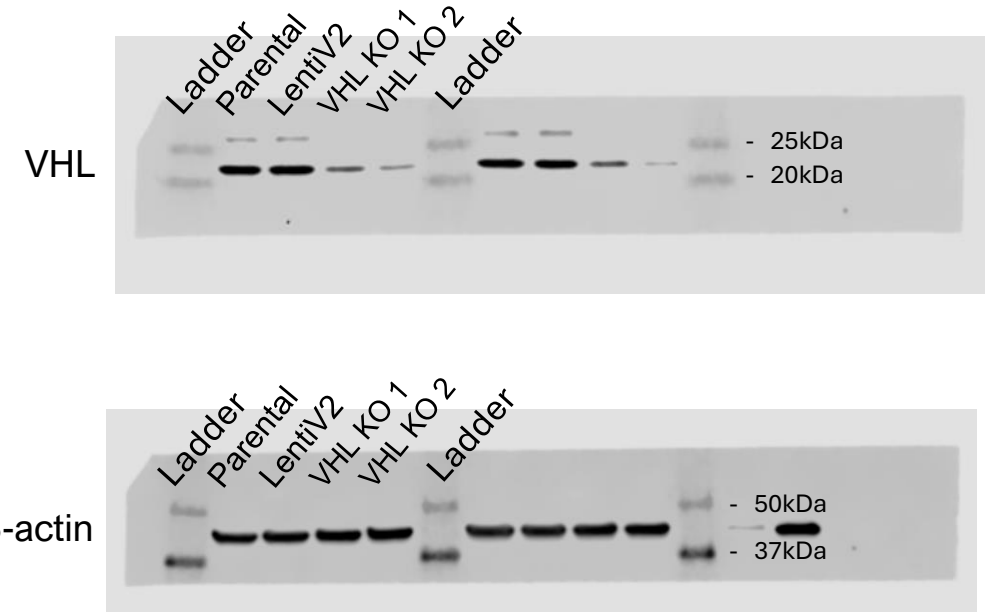

Figure 3L Source data. Original membranes corresponding to Figure 3, panel L. Western blot analysis of VHL CRISPR knockout in HepG2 cells using two gRNAs with HIF1a, Hi2a, VHL and β-actin.
