# Supplementary material for: The context-dependent epigenetic and organogenesis programs determine 3D vs. 2D cellular fitness of MYC-driven murine liver cancer cells
Source: eLife journal article supplement (doi:10.7554/elife.101299), 2025-01-06
Supplement: fig7-data1 [file elife-101299-fig7-data1-v1.zip]

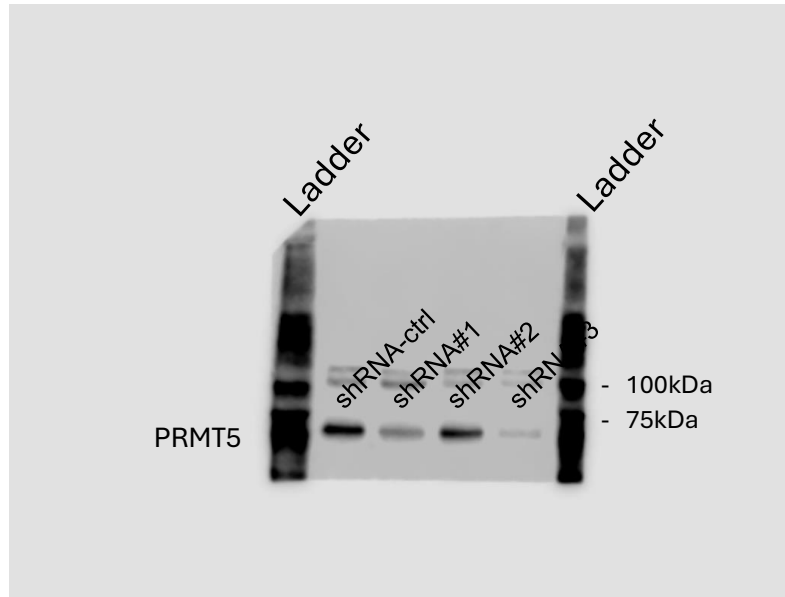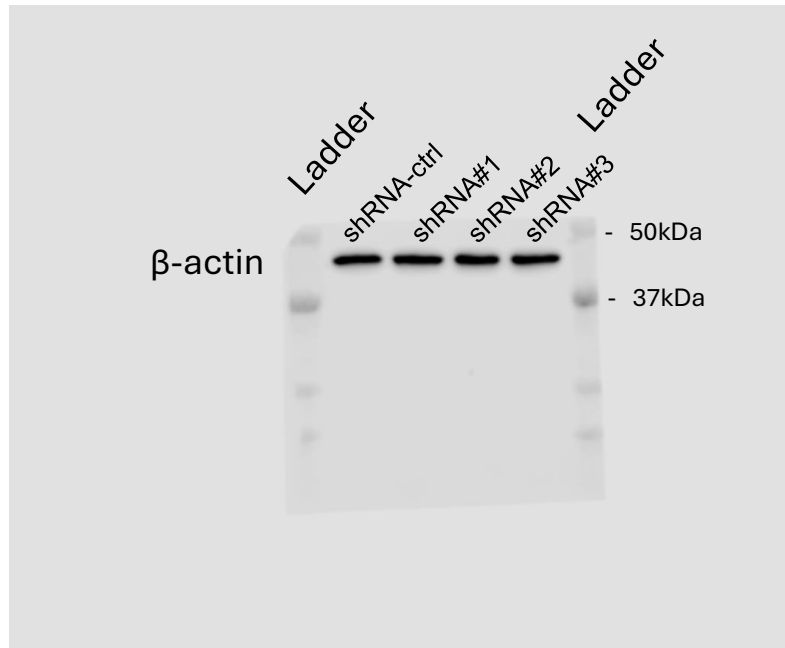

Figure 7B Source data. Original membranes corresponding to Figure 7, panel B. Western blot analysis with PRMT5 and  $\beta$ -actin antibodies after Prtm5 knockdown in NEJF10 cells.
