# Supplementary material for: The context-dependent epigenetic and organogenesis programs determine 3D vs. 2D cellular fitness of MYC-driven murine liver cancer cells
Source: eLife journal article supplement (doi:10.7554/elife.101299), 2025-01-06
Supplement: fig7-data3 [file elife-101299-fig7-data3-v1.zip]

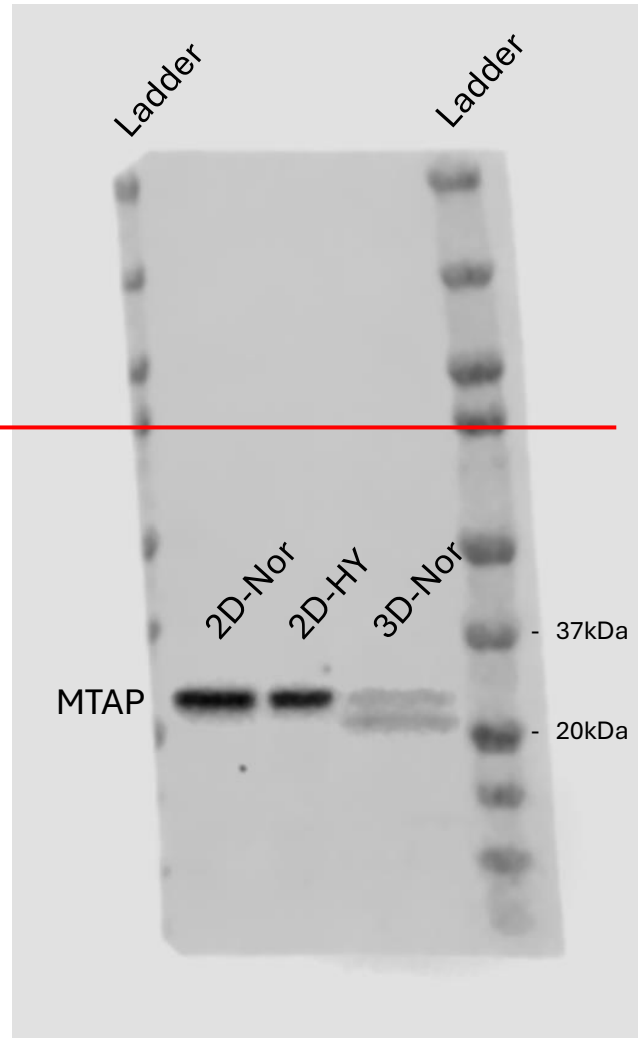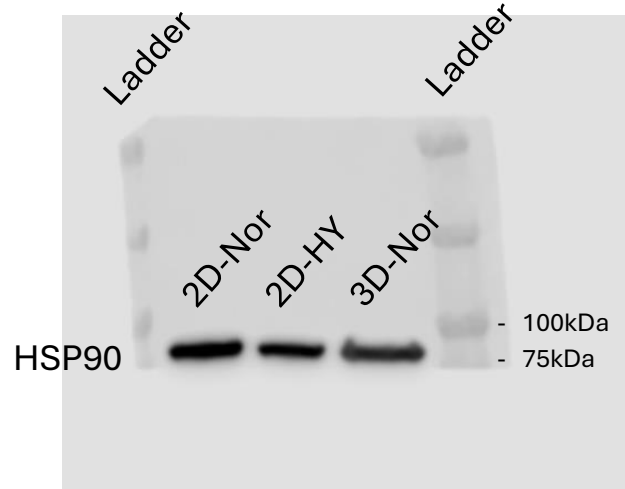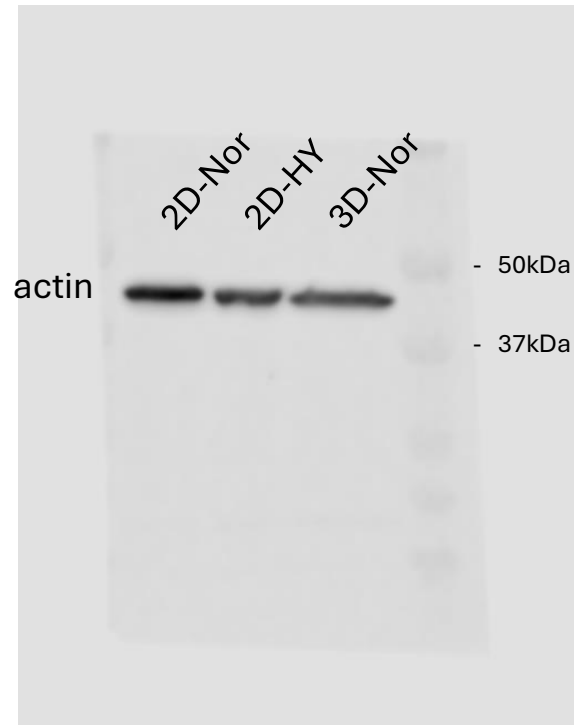

Figure 7J Source data. Original membranes corresponding to Figure 7, panel J. Western blot analysis MTAP, HSP90, and actin of NEJF10 whole cell lysates cultured from 2D normoxia (2D-Nor) and hypoxia (2D-HY) and 3D normoxia (3D-Nor) for 3 days. Membrane was probed MTAP first. Then, membrane was cut cross red line into 2 membranes for probing HSP90 and actin.
