# Supplementary material for: The context-dependent epigenetic and organogenesis programs determine 3D vs. 2D cellular fitness of MYC-driven murine liver cancer cells
Source: eLife. 2025 May 6;14:RP101299. doi: 10.7554/eLife.101299 (PMC12055005; doi:10.7554/eLife.101299)
Supplement: Supplementary file 1. [file elife-101299-supp1.xlsx]

## Sheet: 2D Nor vs hyp
geneID	geneSymbol		log2FC	AveExpr	P.Value	FDR	2D_Nor.AveExpr	2D_Hyp.AveExpr	2283539_NEJF10-2D-Nor-01	2283540_NEJF10-2D-Nor-02	2283541_NEJF10-2D-Hyp-01	2283542_NEJF10-2D-Hyp-02
ENSMUSG00000023886.10	Smoc2	SMOC2	-3.14	6.12	7.1041e-11	4.37996e-07	4.55	7.7	4.63	4.47	7.69	7.7
ENSMUSG00000032332.17	Col12a1	COL12A1	-3.02	5.57	8.63698e-11	4.37996e-07	4.07	7.08	4.11	4.02	7.05	7.12
ENSMUSG00000035385.5	Ccl2	CCL2	2.58	5.54	1.18003e-10	4.37996e-07	6.84	4.25	6.86	6.81	4.25	4.26
ENSMUSG00000027204.13	Fbn1	FBN1	-3.14	5.93	1.60712e-10	4.37996e-07	4.37	7.5	4.47	4.26	7.47	7.53
ENSMUSG00000021792.15	Prxl2a	PRXL2A	2.61	4.8	2.07162e-10	4.37996e-07	6.1	3.5	6.08	6.12	3.46	3.52
ENSMUSG00000022206.7	Npr3	NPR3	-2.36	6.86	2.58685e-10	4.37996e-07	5.68	8.04	5.7	5.66	8.02	8.05
ENSMUSG00000064373.12	Selenop	SELENOP	4.65	5.11	2.73513e-10	4.37996e-07	7.44	2.8	7.64	7.23	2.75	2.83
ENSMUSG00000020044.13	Timp3	TIMP3	-2.39	7.23	3.28745e-10	4.42555e-07	6.04	8.43	6.05	6.02	8.48	8.38
ENSMUSG00000017002.14	Slpi	SLPI	4.46	3.15	2.03248e-10	4.37996e-07	5.38	0.94	5.36	5.39	0.75	1.1
ENSMUSG00000069833.13	Ahnak	AHNAK	-2.75	9.68	4.12409e-10	4.42555e-07	8.31	11.05	8.37	8.25	11.04	11.07
ENSMUSG00000031523.16	Dlc1	DLC1	-2.74	5.78	4.79817e-10	4.42555e-07	4.4	7.15	4.5	4.31	7.09	7.21
ENSMUSG00000064080.12	Fbln2	FBLN2	-2.56	8.41	5.06387e-10	4.42555e-07	7.12	9.68	7.06	7.19	9.68	9.69
ENSMUSG00000003316.14	Glg1	GLG1	-2.14	6.37	5.31205e-10	4.42555e-07	5.3	7.44	5.29	5.32	7.43	7.45
ENSMUSG00000025743.14	Sdc3	SDC3	-2.23	6.7	5.75419e-10	4.42555e-07	5.58	7.82	5.55	5.62	7.86	7.78
ENSMUSG00000000628.10	Hk2	HK2	-2.3	7.14	5.87263e-10	4.42555e-07	5.99	8.29	6.04	5.94	8.25	8.32
ENSMUSG00000001506.10	Col1a1	COL1A1	-3.18	5.26	6.23281e-10	4.43603e-07	3.67	6.86	3.8	3.55	6.76	6.94
ENSMUSG00000030110.13	Ret	RET	-3.35	3.51	4.67332e-10	4.42555e-07	1.84	5.19	1.78	1.88	5.19	5.17
ENSMUSG00000092035.8	Peg10	PEG10	-2.27	6.3	7.76267e-10	4.91641e-07	5.17	7.44	5.24	5.1	7.43	7.45
ENSMUSG00000031502.11	Col4a1	COL4A1	-2.06	5.77	8.75477e-10	4.91641e-07	4.74	6.8	4.72	4.76	6.81	6.79
ENSMUSG00000041417.15	Pik3r1	PIK3R1	-2.05	6.36	9.104e-10	4.91641e-07	5.34	7.38	5.31	5.36	7.36	7.4
ENSMUSG00000029816.10	Gpnmb	GPNMB	3.02	3.33	9.26254e-10	4.91641e-07	4.84	1.83	4.78	4.9	1.83	1.8
ENSMUSG00000004891.16	Nes	NES	-2.3	5.08	1.12976e-09	4.91641e-07	3.93	6.23	4	3.86	6.25	6.22
ENSMUSG00000026385.16	Dbi	DBI	2.31	7.2	1.19882e-09	4.91641e-07	8.36	6.05	8.45	8.26	6.09	6
ENSMUSG00000025283.15	Sat1	SAT1	2.49	6.21	1.21636e-09	4.91641e-07	7.46	4.97	7.59	7.33	4.98	4.97
ENSMUSG00000028364.15	Tnc	TNC	-2.92	5.95	1.21622e-09	4.91641e-07	4.49	7.41	4.6	4.38	7.53	7.29
ENSMUSG00000052698.15	Tln2	TLN2	-2.07	5.15	1.23715e-09	4.91641e-07	4.12	6.19	4.13	4.1	6.19	6.18
ENSMUSG00000019256.17	Ahr	AHR	-2.07	5.46	1.25144e-09	4.91641e-07	4.43	6.5	4.47	4.39	6.5	6.49
ENSMUSG00000038729.23	Akap2	AKAP2	-2.18	5.66	1.27544e-09	4.91641e-07	4.56	6.75	4.54	4.59	6.69	6.81
ENSMUSG00000027087.11	Itgav	ITGAV	-2.08	7.51	1.3219e-09	4.91641e-07	6.47	8.55	6.43	6.52	8.52	8.58
ENSMUSG00000002900.16	Lamb1	LAMB1	-2.12	6.64	1.33964e-09	4.91641e-07	5.58	7.7	5.61	5.55	7.77	7.63
ENSMUSG00000022443.17	Myh9	MYH9	-2.35	9.33	1.31751e-09	4.91641e-07	8.15	10.5	8.21	8.09	10.48	10.53
ENSMUSG00000034158.9	Lrrc58	LRRC58	-2	7.82	1.34652e-09	4.91641e-07	6.81	8.82	6.8	6.83	8.83	8.8
ENSMUSG00000031561.16	Tenm3	TENM3	-2.68	5.1	1.3503e-09	4.91641e-07	3.76	6.44	3.9	3.63	6.4	6.48
ENSMUSG00000026640.12	Plxna2	PLXNA2	-2.36	5.29	1.37592e-09	4.91641e-07	4.11	6.47	4.21	4.01	6.45	6.49
ENSMUSG00000025969.15	Nrp2	NRP2	-2.06	7.87	1.43388e-09	4.9647e-07	6.84	8.91	6.8	6.88	8.89	8.92
ENSMUSG00000029648.13	Flt1	FLT1	-2.44	4.24	1.38155e-09	4.91641e-07	3.02	5.46	2.97	3.07	5.44	5.48
ENSMUSG00000048756.11	Foxo3	FOXO3	-2.01	7.18	1.49875e-09	5.03422e-07	6.17	8.19	6.14	6.21	8.14	8.23
ENSMUSG00000021823.10	Vcl	VCL	-1.92	7.44	1.58719e-09	5.03422e-07	6.48	8.4	6.47	6.49	8.42	8.38
ENSMUSG00000025278.9	Flnb	FLNB	-2.63	9.46	1.57136e-09	5.03422e-07	8.14	10.77	8.25	8.04	10.77	10.78
ENSMUSG00000021614.16	Vcan	VCAN	-2.31	7.22	1.68362e-09	5.03422e-07	6.06	8.38	6.16	5.96	8.36	8.39
ENSMUSG00000037010.7	Apln	APLN	-1.98	5.19	1.67866e-09	5.03422e-07	4.2	6.18	4.18	4.21	6.19	6.17
ENSMUSG00000040711.7	Sh3pxd2b	SH3PXD2B	-1.9	6.35	1.70095e-09	5.03422e-07	5.4	7.29	5.44	5.36	7.29	7.3
ENSMUSG00000026678.10	Rgs5	RGS5	2.08	6.45	1.77075e-09	5.03422e-07	7.49	5.41	7.53	7.45	5.33	5.49
ENSMUSG00000033713.12	Foxn3	FOXN3	-1.87	6.45	1.8833e-09	5.03422e-07	5.52	7.38	5.51	5.53	7.35	7.42
ENSMUSG00000096255.2	Dynlt1b	DYNLT1B	1.97	6.36	1.91969e-09	5.03422e-07	7.35	5.38	7.42	7.28	5.39	5.36
ENSMUSG00000048612.16	Myof	MYOF	-1.98	8.18	1.92622e-09	5.03422e-07	7.19	9.16	7.21	7.16	9.16	9.17
ENSMUSG00000049539.3	Hist1h1a	HIST1H1A	2.72	4.59	2.0357e-09	5.03422e-07	5.95	3.23	6.08	5.82	3.25	3.21
ENSMUSG00000024924.14	Vldlr	VLDLR	-1.9	5.75	2.04888e-09	5.03422e-07	4.8	6.7	4.76	4.83	6.67	6.71
ENSMUSG00000033295.14	Ptprf	PTPRF	-1.82	6.08	2.07192e-09	5.03422e-07	5.18	6.99	5.16	5.19	6.98	7
ENSMUSG00000030516.14	Tjp1	TJP1	-1.82	7.02	2.10365e-09	5.03422e-07	6.11	7.93	6.09	6.13	7.93	7.93
ENSMUSG00000039542.16	Ncam1	NCAM1	-2.81	6.31	2.12957e-09	5.03422e-07	4.91	7.72	4.73	5.08	7.69	7.75
ENSMUSG00000003617.16	Cp	CP	2.07	7.51	2.16351e-09	5.03422e-07	8.54	6.48	8.49	8.6	6.42	6.54
ENSMUSG00000033306.15	Lpp	LPP	-2.27	6.18	2.18938e-09	5.03422e-07	5.04	7.32	5.16	4.93	7.32	7.32
ENSMUSG00000016495.12	Plgrkt	PLGRKT	2.44	5.24	2.23238e-09	5.03422e-07	6.46	4.02	6.57	6.34	3.95	4.08
ENSMUSG00000037992.16	Rara	RARA	-1.83	5.72	2.27917e-09	5.03422e-07	4.81	6.64	4.82	4.79	6.62	6.66
ENSMUSG00000032479.15	Map4	MAP4	-1.88	6.39	2.3577e-09	5.11941e-07	5.45	7.33	5.49	5.41	7.36	7.3
ENSMUSG00000029334.14	Prkg2	PRKG2	1.84	6.99	2.71452e-09	5.65882e-07	7.92	6.08	7.93	7.9	6.13	6.03
ENSMUSG00000067336.6	Bmpr2	BMPR2	-1.85	6.01	2.73052e-09	5.65882e-07	5.08	6.94	5.13	5.03	6.94	6.93
ENSMUSG00000001870.16	Ltbp1	LTBP1	-1.89	7.5	2.73864e-09	5.65882e-07	6.56	8.45	6.56	6.56	8.5	8.39
ENSMUSG00000058230.12	Arhgap35	ARHGAP35	-1.81	7.01	2.80167e-09	5.69718e-07	6.11	7.92	6.13	6.08	7.95	7.88
ENSMUSG00000038119.15	Cdon	CDON	-1.88	4.96	2.95589e-09	5.82584e-07	4.02	5.89	4.03	4.01	5.89	5.9
ENSMUSG00000032220.10	Myo1e	MYO1E	-1.78	5.75	2.95366e-09	5.82584e-07	4.86	6.65	4.83	4.89	6.65	6.65
ENSMUSG00000067889.5	Sptbn2	SPTBN2	-3.6	3.08	2.26959e-09	5.03422e-07	1.29	4.88	1.4	1.17	4.8	4.95
ENSMUSG00000040152.8	Thbs1	THBS1	-2.37	9.88	3.03343e-09	5.88807e-07	8.7	11.06	8.79	8.6	11.09	11.04
ENSMUSG00000054555.11	Adam12	ADAM12	-2.37	5.17	3.17948e-09	6.02118e-07	3.98	6.35	4.1	3.86	6.4	6.29
ENSMUSG00000026193.15	Fn1	FN1	-2.7	9.28	3.26064e-09	6.02118e-07	7.93	10.63	8.07	7.78	10.61	10.65
ENSMUSG00000020900.15	Myh10	MYH10	-2.18	7.89	3.30531e-09	6.02118e-07	6.8	8.97	6.89	6.71	8.93	9.02
ENSMUSG00000046814.3	Gchfr	GCHFR	2.31	3.71	3.28886e-09	6.02118e-07	4.87	2.55	4.92	4.8	2.58	2.53
ENSMUSG00000038146.8	Notch3	NOTCH3	-2.44	4.26	3.33701e-09	6.02118e-07	3.04	5.48	3.13	2.94	5.42	5.53
ENSMUSG00000043760.16	Pkhd1	PKHD1	-2.17	4.47	3.53826e-09	6.24495e-07	3.38	5.56	3.47	3.3	5.53	5.58
ENSMUSG00000028465.16	Tln1	TLN1	-2.05	7.64	3.55852e-09	6.24495e-07	6.62	8.66	6.7	6.53	8.68	8.65
ENSMUSG00000015143.15	Actn1	ACTN1	-1.75	7.78	3.89353e-09	6.58142e-07	6.91	8.66	6.91	6.9	8.67	8.65
ENSMUSG00000031429.14	Psmd10	PSMD10	1.84	6.49	3.92923e-09	6.58142e-07	7.41	5.57	7.48	7.33	5.55	5.58
ENSMUSG00000026980.15	Ly75	LY75	-1.79	5.81	4.07059e-09	6.68569e-07	4.92	6.71	4.96	4.88	6.75	6.67
ENSMUSG00000040447.15	Spns2	SPNS2	-2.42	3.49	3.95574e-09	6.58142e-07	2.28	4.7	2.32	2.24	4.69	4.71
ENSMUSG00000040856.17	Dlk1	DLK1	-2.11	7.7	4.31171e-09	6.73492e-07	6.66	8.76	6.58	6.73	8.68	8.84
ENSMUSG00000022641.15	Bbx	BBX	-1.76	6.4	4.29079e-09	6.73492e-07	5.53	7.28	5.48	5.57	7.24	7.31
ENSMUSG00000018707.13	Dync1h1	DYNC1H1	-2.32	8.18	4.38069e-09	6.73492e-07	7.02	9.34	7.14	6.9	9.33	9.35
ENSMUSG00000000957.11	Mmp14	MMP14	-1.75	7.76	4.42213e-09	6.73492e-07	6.89	8.64	6.86	6.92	8.64	8.64
ENSMUSG00000024990.13	Rbp4	RBP4	2.3	5.93	4.40688e-09	6.73492e-07	7.08	4.78	7	7.15	4.65	4.91
ENSMUSG00000027646.15	Src	SRC	-1.65	6.34	4.47556e-09	6.73492e-07	5.52	7.17	5.5	5.54	7.18	7.17
ENSMUSG00000024043.13	Arhgap28	ARHGAP28	-1.79	5.13	4.5549e-09	6.73492e-07	4.24	6.03	4.25	4.23	5.99	6.06
ENSMUSG00000018909.15	Arrb1	ARRB1	-1.93	6.15	4.57593e-09	6.73492e-07	5.19	7.11	5.28	5.1	7.1	7.12
ENSMUSG00000074604.9	Mgst2	MGST2	2.58	4.63	4.69721e-09	6.73492e-07	5.92	3.34	6.05	5.78	3.27	3.42
ENSMUSG00000052040.10	Klf13	KLF13	-1.79	5.16	4.71307e-09	6.73492e-07	4.26	6.05	4.22	4.31	6.04	6.07
ENSMUSG00000026478.14	Lamc1	LAMC1	-2.24	7.37	4.73143e-09	6.73492e-07	6.25	8.5	6.37	6.12	8.47	8.52
ENSMUSG00000021754.17	Map3k1	MAP3K1	-1.71	6.06	4.71567e-09	6.73492e-07	5.2	6.92	5.22	5.18	6.87	6.96
ENSMUSG00000014329.14	Bicc1	BICC1	-1.94	6.97	4.90128e-09	6.89366e-07	6	7.95	5.92	6.09	7.91	7.98
ENSMUSG00000057738.13	Sptan1	SPTAN1	-1.76	8.24	5.02752e-09	6.89366e-07	7.36	9.12	7.38	7.33	9.13	9.11
ENSMUSG00000050965.14	Prkca	PRKCA	-1.8	4.94	5.06752e-09	6.89366e-07	4.04	5.84	4.06	4.03	5.87	5.81
ENSMUSG00000038296.14	Galnt18	GALNT18	-2.08	4.41	5.10585e-09	6.89366e-07	3.38	5.45	3.38	3.37	5.39	5.51
ENSMUSG00000068699.12	Flnc	FLNC	-2.06	7.82	5.27326e-09	6.89366e-07	6.79	8.84	6.89	6.69	8.85	8.84
ENSMUSG00000023830.14	Igf2r	IGF2R	-1.71	8.09	5.34401e-09	6.89366e-07	7.24	8.95	7.23	7.24	8.95	8.95
ENSMUSG00000026490.18	Cdc42bpa	CDC42BPA	-1.89	5.9	5.32432e-09	6.89366e-07	4.96	6.84	5.05	4.87	6.85	6.84
ENSMUSG00000038545.13	Cul7	CUL7	-1.64	5.98	5.35984e-09	6.89366e-07	5.17	6.8	5.19	5.14	6.78	6.82
ENSMUSG00000027422.15	Rrbp1	RRBP1	-1.73	6.79	5.36227e-09	6.89366e-07	5.92	7.66	5.97	5.88	7.62	7.69
ENSMUSG00000030067.17	Foxp1	FOXP1	-1.63	7.05	5.47755e-09	6.89366e-07	6.23	7.87	6.22	6.25	7.88	7.85
ENSMUSG00000026574.5	Dpt	DPT	5.08	1.77	2.14642e-09	5.03422e-07	4.31	-0.72	4.42	4.2	-0.75	-0.79
ENSMUSG00000034243.17	Golgb1	GOLGB1	-1.82	6.06	5.52795e-09	6.89366e-07	5.15	6.96	5.23	5.07	6.95	6.98
ENSMUSG00000030201.15	Lrp6	LRP6	-1.77	6.46	5.66473e-09	6.89366e-07	5.57	7.35	5.64	5.5	7.32	7.37
ENSMUSG00000032402.12	Smad3	SMAD3	-1.63	6.33	5.70071e-09	6.89366e-07	5.52	7.14	5.5	5.54	7.12	7.17
ENSMUSG00000096001.2	2610528A11Rik	2610528A11RIK	-2.06	6.41	5.73532e-09	6.89366e-07	5.38	7.44	5.28	5.47	7.36	7.51
ENSMUSG00000001119.7	Col6a1	COL6A1	-1.67	6.62	5.72492e-09	6.89366e-07	5.79	7.46	5.75	5.82	7.42	7.5
ENSMUSG00000031347.12	Cetn2	CETN2	1.66	5.67	5.72685e-09	6.89366e-07	6.5	4.84	6.55	6.44	4.85	4.83
ENSMUSG00000021876.15	Rnase4	RNASE4	1.75	6.19	5.75772e-09	6.89366e-07	7.07	5.32	7.15	6.99	5.31	5.33
ENSMUSG00000054150.12	Syne3	SYNE3	-1.77	4.94	5.90378e-09	6.93884e-07	4.06	5.83	4.06	4.05	5.79	5.86
ENSMUSG00000025260.10	Hsd17b10	HSD17B10	1.75	6.57	5.86146e-09	6.93884e-07	7.46	5.7	7.53	7.38	5.67	5.73
ENSMUSG00000025584.17	Pde8a	PDE8A	-2.25	3.72	5.97628e-09	6.96019e-07	2.6	4.85	2.53	2.67	4.83	4.87
ENSMUSG00000039952.15	Dag1	DAG1	-2.07	6.31	6.06285e-09	6.98845e-07	5.28	7.34	5.15	5.4	7.35	7.34
ENSMUSG00000020099.8	Unc5b	UNC5B	-1.73	6.69	6.11498e-09	6.98845e-07	5.83	7.56	5.86	5.8	7.62	7.5
ENSMUSG00000034101.14	Ctnnd1	CTNND1	-1.72	7.4	6.1642e-09	6.98845e-07	6.54	8.26	6.49	6.59	8.25	8.27
ENSMUSG00000031503.13	Col4a2	COL4A2	-2.17	4.41	6.41886e-09	7.21334e-07	3.33	5.49	3.44	3.2	5.47	5.52
ENSMUSG00000025555.14	Farp1	FARP1	-1.73	6.37	6.51925e-09	7.22216e-07	5.51	7.24	5.58	5.44	7.23	7.24
ENSMUSG00000021097.15	Clmn	CLMN	-2.24	3.68	6.63176e-09	7.22216e-07	2.55	4.8	2.58	2.53	4.75	4.84
ENSMUSG00000023913.17	Pla2g7	PLA2G7	1.97	4.94	6.67243e-09	7.22216e-07	5.92	3.96	5.96	5.89	3.85	4.07
ENSMUSG00000025962.15	Fastkd2	FASTKD2	1.79	6.53	6.62365e-09	7.22216e-07	7.42	5.63	7.5	7.34	5.67	5.59
ENSMUSG00000019943.10	Atp2b1	ATP2B1	-1.6	7.04	6.70859e-09	7.22216e-07	6.25	7.85	6.25	6.23	7.82	7.88
ENSMUSG00000039385.5	Cdh6	CDH6	-2.08	4.16	6.93899e-09	7.3227e-07	3.12	5.2	3.18	3.06	5.15	5.24
ENSMUSG00000031010.17	Usp9x	USP9X	-1.72	8.01	6.97345e-09	7.3227e-07	7.15	8.87	7.12	7.18	8.9	8.84
ENSMUSG00000040423.10	Rc3h1	RC3H1	-1.56	6.52	6.9228e-09	7.3227e-07	5.74	7.29	5.72	5.76	7.29	7.3
ENSMUSG00000027624.19	Epb41l1	EPB41L1	-1.58	7.31	7.24224e-09	7.44108e-07	6.52	8.11	6.53	6.51	8.11	8.1
ENSMUSG00000028893.8	Sesn2	SESN2	-1.82	4.66	7.43469e-09	7.44108e-07	3.75	5.56	3.8	3.7	5.54	5.59
ENSMUSG00000024620.11	Pdgfrb	PDGFRB	-1.55	6.74	7.25637e-09	7.44108e-07	5.96	7.52	5.97	5.95	7.5	7.53
ENSMUSG00000029313.18	Aff1	AFF1	-1.72	6.56	7.32193e-09	7.44108e-07	5.7	7.42	5.77	5.63	7.42	7.42
ENSMUSG00000005871.15	Apc	APC	-1.63	5.98	7.38152e-09	7.44108e-07	5.17	6.8	5.21	5.13	6.83	6.77
ENSMUSG00000033715.15	Akr1c14	AKR1C14	1.61	5.96	7.31431e-09	7.44108e-07	6.77	5.16	6.8	6.74	5.11	5.21
ENSMUSG00000006005.18	Tpr	TPR	-1.63	7.8	7.57903e-09	7.46884e-07	6.98	8.61	7	6.97	8.63	8.59
ENSMUSG00000049354.8	Dcaf7	DCAF7	-1.56	6.48	7.54721e-09	7.46884e-07	5.7	7.25	5.67	5.73	7.25	7.26
ENSMUSG00000031628.9	Casp3	CASP3	1.52	6.82	7.65078e-09	7.48199e-07	7.58	6.05	7.57	7.59	6.07	6.04
ENSMUSG00000033788.15	Dysf	DYSF	-4.12	1.95	3.83563e-09	6.58142e-07	-0.08	4.02	-0.12	-0.1	3.96	4.07
ENSMUSG00000029207.16	Apbb2	APBB2	-1.93	6.52	7.78396e-09	7.53089e-07	5.55	7.48	5.65	5.45	7.53	7.43
ENSMUSG00000046743.6	Fat4	FAT4	-2.05	4.9	7.96898e-09	7.55543e-07	3.88	5.93	4	3.76	5.91	5.94
ENSMUSG00000037111.9	Setd7	SETD7	-1.67	6.95	7.81835e-09	7.53089e-07	6.11	7.78	6.17	6.05	7.79	7.77
ENSMUSG00000055917.15	Zfp277	ZFP277	1.66	5.66	7.96467e-09	7.55543e-07	6.49	4.82	6.56	6.42	4.81	4.84
ENSMUSG00000024201.12	Kdm4b	KDM4B	-1.67	5.75	8.07599e-09	7.55543e-07	4.92	6.58	4.88	4.95	6.53	6.64
ENSMUSG00000040010.10	Slc7a5	SLC7A5	-1.62	6.8	8.07972e-09	7.55543e-07	5.99	7.62	5.98	5.99	7.67	7.56
ENSMUSG00000032531.15	Amotl2	AMOTL2	-1.8	7.6	8.41195e-09	7.75291e-07	6.7	8.5	6.78	6.62	8.5	8.51
ENSMUSG00000031266.6	Gla	GLA	1.68	5.27	8.34644e-09	7.74828e-07	6.11	4.43	6.07	6.14	4.37	4.49
ENSMUSG00000060961.15	Slc4a4	SLC4A4	-2.19	4.5	8.67786e-09	7.83906e-07	3.41	5.6	3.29	3.52	5.53	5.66
ENSMUSG00000078881.10	Gm14434	GM14434	2.04	3.86	8.71413e-09	7.83906e-07	4.88	2.84	4.9	4.85	2.75	2.93
ENSMUSG00000031075.18	Ano1	ANO1	-1.85	7.58	8.62674e-09	7.83906e-07	6.66	8.5	6.57	6.75	8.5	8.51
ENSMUSG00000002052.6	Supt6	SUPT6	-1.53	6.43	8.80368e-09	7.83906e-07	5.67	7.2	5.7	5.64	7.19	7.2
ENSMUSG00000013033.16	Adgrl1	ADGRL1	-1.85	5.76	9.05769e-09	7.83906e-07	4.84	6.69	4.94	4.73	6.69	6.68
ENSMUSG00000029705.17	Cux1	CUX1	-1.65	7.29	9.09669e-09	7.83906e-07	6.46	8.11	6.52	6.41	8.12	8.1
ENSMUSG00000031983.7	2310022B05Rik	2310022B05RIK	-1.52	6.01	9.07163e-09	7.83906e-07	5.24	6.76	5.22	5.26	6.76	6.77
ENSMUSG00000003534.17	Ddr1	DDR1	-1.51	6.71	9.08096e-09	7.83906e-07	5.96	7.46	5.95	5.97	7.45	7.48
ENSMUSG00000072872.3	Rybp	RYBP	-1.59	5.16	9.29918e-09	7.83906e-07	4.37	5.96	4.35	4.39	5.96	5.97
ENSMUSG00000054027.8	Nt5dc3	NT5DC3	-1.61	5.11	9.32172e-09	7.83906e-07	4.3	5.92	4.32	4.28	5.9	5.93
ENSMUSG00000044167.6	Foxo1	FOXO1	-2.14	4.31	9.58235e-09	7.83906e-07	3.24	5.38	3.35	3.12	5.33	5.42
ENSMUSG00000023805.17	Synj2	SYNJ2	-1.67	5.19	9.42296e-09	7.83906e-07	4.36	6.02	4.35	4.36	6.07	5.97
ENSMUSG00000057335.11	Cep170	CEP170	-1.65	6.5	9.28188e-09	7.83906e-07	5.68	7.33	5.74	5.61	7.35	7.31
ENSMUSG00000068270.15	Shroom4	SHROOM4	-1.86	5.08	9.54334e-09	7.83906e-07	4.15	6.01	4.2	4.1	6.08	5.94
ENSMUSG00000040363.15	Bcor	BCOR	-1.59	5.09	9.54008e-09	7.83906e-07	4.29	5.88	4.3	4.28	5.88	5.89
ENSMUSG00000048078.16	Tenm4	TENM4	-2.58	3.85	9.70333e-09	7.83906e-07	2.56	5.13	2.69	2.43	5.05	5.22
ENSMUSG00000040990.17	Sh3kbp1	SH3KBP1	-1.63	5.01	9.61769e-09	7.83906e-07	4.2	5.83	4.16	4.22	5.83	5.82
ENSMUSG00000043154.15	Ppp2r3a	PPP2R3A	-1.79	4.25	1.00232e-08	7.83906e-07	3.36	5.15	3.35	3.37	5.16	5.14
ENSMUSG00000044864.16	Ankrd50	ANKRD50	-1.54	6.75	9.77338e-09	7.83906e-07	5.97	7.53	5.94	6.01	7.55	7.5
ENSMUSG00000035064.17	Eef2k	EEF2K	-1.68	5.92	9.89522e-09	7.83906e-07	5.08	6.76	5.02	5.14	6.71	6.81
ENSMUSG00000006800.14	Sulf2	SULF2	-1.57	6.02	9.91829e-09	7.83906e-07	5.24	6.8	5.19	5.29	6.8	6.81
ENSMUSG00000019820.11	Utrn	UTRN	-1.94	6.86	1.00444e-08	7.83906e-07	5.88	7.83	6	5.77	7.8	7.86
ENSMUSG00000078922.9	Tgtp1	TGTP1	2.63	2.67	9.72986e-09	7.83906e-07	3.99	1.36	3.98	3.99	1.23	1.48
ENSMUSG00000028868.13	Wasf2	WASF2	-1.57	5.9	1.01193e-08	7.83906e-07	5.12	6.69	5.14	5.1	6.73	6.65
ENSMUSG00000025314.16	Ptprj	PTPRJ	-1.74	4.34	1.04856e-08	7.8678e-07	3.48	5.21	3.48	3.46	5.21	5.21
ENSMUSG00000052727.6	Map1b	MAP1B	-2.12	5.83	1.02279e-08	7.83906e-07	4.77	6.88	4.88	4.65	6.98	6.79
ENSMUSG00000040322.10	Slc25a24	SLC25A24	-1.68	6.84	1.01721e-08	7.83906e-07	6	7.68	5.92	6.07	7.69	7.67
ENSMUSG00000022272.17	Myo10	MYO10	-1.87	6.56	1.03411e-08	7.83906e-07	5.62	7.5	5.73	5.51	7.51	7.48
ENSMUSG00000025491.14	Ifitm1	IFITM1	2.93	2.66	9.99584e-09	7.83906e-07	4.13	1.21	4.24	4.02	1.13	1.27
ENSMUSG00000028378.6	Ptgr1	PTGR1	1.82	4.29	1.07421e-08	7.92504e-07	5.2	3.38	5.26	5.13	3.35	3.41
ENSMUSG00000059456.13	Ptk2b	PTK2B	-1.73	4.91	1.07211e-08	7.92504e-07	4.04	5.77	4.11	3.97	5.76	5.78
ENSMUSG00000020841.5	Cpd	CPD	-1.51	5.78	1.05019e-08	7.8678e-07	5.03	6.54	5.01	5.04	6.55	6.52
ENSMUSG00000033960.6	Jcad	JCAD	-1.61	5.23	1.08876e-08	7.92504e-07	4.43	6.04	4.46	4.4	6.07	6.01
ENSMUSG00000002812.4	Flii	FLII	-1.48	6.15	1.08556e-08	7.92504e-07	5.42	6.89	5.4	5.43	6.9	6.89
ENSMUSG00000063077.14	Kif1b	KIF1B	-1.49	6.53	1.08649e-08	7.92504e-07	5.78	7.27	5.8	5.76	7.29	7.25
ENSMUSG00000026639.18	Lamb3	LAMB3	-3.68	3.07	1.02867e-08	7.83906e-07	1.24	4.92	0.92	1.53	4.85	4.98
ENSMUSG00000039286.12	Fndc3b	FNDC3B	-1.74	5.66	1.13071e-08	8.08421e-07	4.79	6.53	4.88	4.7	6.52	6.53
ENSMUSG00000021068.16	Nin	NIN	-1.55	5.85	1.12727e-08	8.08421e-07	5.08	6.63	5.13	5.03	6.63	6.62
ENSMUSG00000034940.15	Synrg	SYNRG	-1.65	4.61	1.16524e-08	8.08421e-07	3.79	5.44	3.78	3.79	5.43	5.45
ENSMUSG00000017176.17	Nt5c3b	NT5C3B	1.51	5.52	1.13347e-08	8.08421e-07	6.28	4.77	6.32	6.23	4.77	4.77
ENSMUSG00000030096.8	Slc6a6	SLC6A6	-1.63	8.05	1.17161e-08	8.08421e-07	7.24	8.87	7.23	7.24	8.92	8.81
ENSMUSG00000035247.16	Hectd1	HECTD1	-1.62	7.49	1.17376e-08	8.08421e-07	6.69	8.3	6.74	6.63	8.33	8.28
ENSMUSG00000023367.14	Tmem176a	TMEM176A	1.62	5.57	1.17014e-08	8.08421e-07	6.38	4.76	6.31	6.46	4.74	4.78
ENSMUSG00000029581.14	Fscn1	FSCN1	-1.6	8.52	1.21159e-08	8.08421e-07	7.72	9.32	7.73	7.71	9.32	9.31
ENSMUSG00000059495.14	Arhgef12	ARHGEF12	-1.52	6.56	1.17931e-08	8.08421e-07	5.8	7.32	5.84	5.75	7.33	7.31
ENSMUSG00000042207.17	Kdm5b	KDM5B	-1.5	7	1.18913e-08	8.08421e-07	6.25	7.75	6.27	6.24	7.72	7.78
ENSMUSG00000026097.9	Ormdl1	ORMDL1	1.7	5.33	1.18615e-08	8.08421e-07	6.17	4.48	6.26	6.09	4.48	4.47
ENSMUSG00000029632.7	Ndufa4	NDUFA4	2.05	7.78	1.20826e-08	8.08421e-07	8.8	6.75	8.95	8.66	6.77	6.74
ENSMUSG00000048285.9	Frmd6	FRMD6	-1.52	6.03	1.19397e-08	8.08421e-07	5.26	6.79	5.22	5.31	6.78	6.8
ENSMUSG00000037851.13	Iars	IARS	-1.55	6.51	1.20492e-08	8.08421e-07	5.73	7.29	5.73	5.73	7.34	7.23
ENSMUSG00000000581.8	C1d	C1D	1.85	6.52	1.20416e-08	8.08421e-07	7.45	5.6	7.56	7.33	5.56	5.64
ENSMUSG00000055980.2	Irs1	IRS1	-1.61	5.22	1.24043e-08	8.23374e-07	4.42	6.03	4.47	4.36	6.03	6.02
ENSMUSG00000028063.15	Lmna	LMNA	-1.67	9.17	1.27905e-08	8.24023e-07	8.34	10.01	8.33	8.35	9.99	10.03
ENSMUSG00000028194.15	Ddah1	DDAH1	-1.64	5.22	1.26226e-08	8.24023e-07	4.4	6.04	4.39	4.4	6.09	5.98
ENSMUSG00000000171.5	Sdhd	SDHD	1.81	7.9	1.26812e-08	8.24023e-07	8.81	7	8.91	8.71	7.03	6.96
ENSMUSG00000003660.10	Snrnp200	SNRNP200	-1.77	7.17	1.27614e-08	8.24023e-07	6.29	8.05	6.38	6.2	8.09	8.02
ENSMUSG00000024913.16	Lrp5	LRP5	-1.51	5.27	1.28643e-08	8.24023e-07	4.52	6.02	4.53	4.5	6.02	6.02
ENSMUSG00000037896.17	Rcor1	RCOR1	-1.46	5.83	1.28622e-08	8.24023e-07	5.11	6.56	5.12	5.09	6.57	6.56
ENSMUSG00000090356.2	Teddm3	TEDDM3	2.64	3.76	1.34982e-08	8.27394e-07	5.08	2.44	5.22	4.94	2.33	2.55
ENSMUSG00000031458.8	Coprs	COPRS	1.75	4.48	1.32333e-08	8.27394e-07	5.36	3.6	5.42	5.28	3.6	3.61
ENSMUSG00000079197.10	Psme2	PSME2	1.61	6.23	1.27708e-08	8.24023e-07	7.03	5.42	7.1	6.96	5.39	5.46
ENSMUSG00000058056.16	Palld	PALLD	-1.85	4.95	1.33379e-08	8.27394e-07	4.03	5.87	4.08	3.98	5.79	5.95
ENSMUSG00000031749.12	St3gal2	ST3GAL2	-1.65	5.45	1.32047e-08	8.27394e-07	4.62	6.28	4.58	4.67	6.22	6.33
ENSMUSG00000017291.13	Taok1	TAOK1	-1.48	7.37	1.31943e-08	8.27394e-07	6.63	8.11	6.62	6.64	8.12	8.1
ENSMUSG00000063870.12	Chd4	CHD4	-1.56	8.36	1.34921e-08	8.27394e-07	7.58	9.14	7.58	7.58	9.14	9.14
ENSMUSG00000020256.14	Aldh1l2	ALDH1L2	-2.28	5.12	1.36835e-08	8.28914e-07	3.98	6.26	3.8	4.16	6.21	6.31
ENSMUSG00000061559.15	Wdr61	WDR61	1.54	6.63	1.33415e-08	8.27394e-07	7.4	5.87	7.47	7.34	5.88	5.85
ENSMUSG00000020464.15	Pnpt1	PNPT1	1.51	5.94	1.34105e-08	8.27394e-07	6.7	5.18	6.74	6.65	5.22	5.14
ENSMUSG00000041040.12	Fam117b	FAM117B	-1.95	6.04	1.36652e-08	8.28914e-07	5.07	7.01	4.94	5.2	6.97	7.06
ENSMUSG00000004610.4	Etfb	ETFB	1.43	6.22	1.34766e-08	8.27394e-07	6.94	5.5	6.97	6.91	5.49	5.52
ENSMUSG00000040097.16	Flywch1	FLYWCH1	-1.51	5.5	1.37837e-08	8.28914e-07	4.74	6.26	4.72	4.77	6.23	6.28
ENSMUSG00000041570.14	Camsap2	CAMSAP2	-1.5	6.22	1.37618e-08	8.28914e-07	5.47	6.97	5.51	5.44	7.01	6.94
ENSMUSG00000026565.18	Pou2f1	POU2F1	-1.62	4.95	1.43068e-08	8.28914e-07	4.14	5.76	4.18	4.09	5.79	5.73
ENSMUSG00000036606.17	Plxnb2	PLXNB2	-1.53	7.9	1.42258e-08	8.28914e-07	7.14	8.66	7.12	7.16	8.65	8.68
ENSMUSG00000033955.13	Tnks1bp1	TNKS1BP1	-1.44	6.75	1.40283e-08	8.28914e-07	6.03	7.47	6	6.05	7.46	7.48
ENSMUSG00000034573.14	Ptpn13	PTPN13	-1.44	6.81	1.41818e-08	8.28914e-07	6.09	7.53	6.09	6.09	7.54	7.51
ENSMUSG00000028684.14	Urod	UROD	1.49	5.58	1.4195e-08	8.28914e-07	6.32	4.84	6.3	6.35	4.79	4.88
ENSMUSG00000039671.18	Zmynd8	ZMYND8	-1.58	6.4	1.43608e-08	8.28914e-07	5.62	7.2	5.68	5.55	7.16	7.23
ENSMUSG00000030750.13	Nsmce1	NSMCE1	1.79	6.03	1.43787e-08	8.28914e-07	6.92	5.13	7.04	6.8	5.13	5.14
ENSMUSG00000038607.12	Gng10	GNG10	1.94	6.18	1.44288e-08	8.28914e-07	7.15	5.22	7.29	7.01	5.19	5.25
ENSMUSG00000020315.18	Sptbn1	SPTBN1	-1.57	8.56	1.5134e-08	8.44194e-07	7.77	9.34	7.75	7.79	9.33	9.35
ENSMUSG00000044026.3	Slc35g1	SLC35G1	1.53	6.47	1.45986e-08	8.3492e-07	7.23	5.7	7.16	7.3	5.71	5.7
ENSMUSG00000032334.10	Loxl1	LOXL1	-1.42	6.71	1.49236e-08	8.44194e-07	6	7.42	5.99	6.01	7.4	7.44
ENSMUSG00000054008.9	Ndst1	NDST1	-1.46	6.65	1.49437e-08	8.44194e-07	5.92	7.38	5.96	5.88	7.4	7.37
ENSMUSG00000061731.9	Ext1	EXT1	-1.58	6.88	1.51244e-08	8.44194e-07	6.1	7.68	6.03	6.16	7.69	7.66
ENSMUSG00000038371.15	Sbf2	SBF2	-1.46	5.73	1.52255e-08	8.44194e-07	4.99	6.46	5.02	4.97	6.44	6.48
ENSMUSG00000020386.5	Sar1b	SAR1B	1.66	6.17	1.51144e-08	8.44194e-07	7	5.34	7.1	6.9	5.35	5.32
ENSMUSG00000059534.8	Uqcr10	UQCR10	1.93	7.03	1.52879e-08	8.44194e-07	8	6.07	8.14	7.86	6.08	6.06
ENSMUSG00000041313.14	Slc7a1	SLC7A1	-1.47	6.91	1.53976e-08	8.46605e-07	6.17	7.64	6.21	6.14	7.65	7.63
ENSMUSG00000032187.16	Smarca4	SMARCA4	-1.57	7.72	1.57061e-08	8.56217e-07	6.94	8.5	6.99	6.89	8.52	8.49
ENSMUSG00000037012.18	Hk1	HK1	-2.25	6.88	1.56675e-08	8.56217e-07	5.76	8.01	5.59	5.93	7.96	8.06
ENSMUSG00000020272.8	Stk10	STK10	-1.64	4.76	1.60667e-08	8.58408e-07	3.94	5.57	3.89	3.99	5.55	5.6
ENSMUSG00000033060.15	Lmo7	LMO7	-1.63	5.34	1.58561e-08	8.58408e-07	4.53	6.16	4.46	4.58	6.11	6.2
ENSMUSG00000055675.6	Kbtbd11	KBTBD11	-3.01	2.39	1.40588e-08	8.28914e-07	0.9	3.91	0.89	0.88	3.83	3.98
ENSMUSG00000039202.12	Abhd2	ABHD2	-1.5	6.09	1.60046e-08	8.58408e-07	5.34	6.84	5.32	5.35	6.89	6.78
ENSMUSG00000040713.12	Creg1	CREG1	1.92	4.47	1.65803e-08	8.58497e-07	5.43	3.5	5.54	5.32	3.49	3.52
ENSMUSG00000037605.16	Adgrl3	ADGRL3	-1.65	6.7	1.60813e-08	8.58408e-07	5.88	7.53	5.96	5.79	7.49	7.56
ENSMUSG00000042978.10	Sbk1	SBK1	-1.64	5.3	1.65229e-08	8.58497e-07	4.49	6.12	4.4	4.57	6.11	6.13
ENSMUSG00000022995.16	Enah	ENAH	-1.45	7.43	1.64191e-08	8.58497e-07	6.71	8.16	6.71	6.71	8.17	8.14
ENSMUSG00000035629.19	Rubcn	RUBCN	-1.45	5.8	1.63438e-08	8.58497e-07	5.08	6.53	5.11	5.04	6.52	6.53
ENSMUSG00000016496.7	Cd274	CD274	2.96	2.1	1.51743e-08	8.44194e-07	3.58	0.64	3.67	3.49	0.66	0.58
ENSMUSG00000029050.15	Ski	SKI	-1.73	5.83	1.67028e-08	8.58497e-07	4.96	6.7	5.07	4.86	6.71	6.68
ENSMUSG00000046731.4	Kctd11	KCTD11	-1.48	5.91	1.66514e-08	8.58497e-07	5.17	6.64	5.11	5.22	6.64	6.65
ENSMUSG00000019997.11	Ccn2	CCN2	-1.77	6.6	1.66614e-08	8.58497e-07	5.72	7.48	5.77	5.67	7.59	7.38
ENSMUSG00000069601.14	Ank3	ANK3	-1.44	6.01	1.66779e-08	8.58497e-07	5.29	6.72	5.32	5.26	6.7	6.75
ENSMUSG00000031563.8	Wwc2	WWC2	-1.45	6.2	1.67531e-08	8.58497e-07	5.48	6.93	5.52	5.44	6.91	6.94
ENSMUSG00000002107.18	Celf2	CELF2	-2.87	2.6	1.60138e-08	8.58408e-07	1.17	4.04	1	1.32	4	4.06
ENSMUSG00000032381.5	Ciao2a	CIAO2A	1.83	6.6	1.67226e-08	8.58497e-07	7.52	5.69	7.65	7.39	5.67	5.7
ENSMUSG00000024007.15	Ppil1	PPIL1	1.52	6.78	1.68683e-08	8.60954e-07	7.54	6.02	7.61	7.47	6.02	6.02
ENSMUSG00000020142.12	Slc1a4	SLC1A4	-1.56	5.72	1.74582e-08	8.83519e-07	4.94	6.49	4.87	5	6.52	6.47
ENSMUSG00000028672.13	Hmgcl	HMGCL	1.57	4.96	1.75173e-08	8.83519e-07	5.75	4.17	5.75	5.73	4.1	4.25
ENSMUSG00000027227.7	Sord	SORD	1.6	5.4	1.73002e-08	8.79494e-07	6.2	4.61	6.14	6.26	4.55	4.66
ENSMUSG00000020850.14	Prpf8	PRPF8	-1.57	8.17	1.80031e-08	8.96938e-07	7.38	8.95	7.43	7.33	8.97	8.93
ENSMUSG00000021277.16	Traf3	TRAF3	-1.48	5.68	1.77058e-08	8.86049e-07	4.95	6.42	4.99	4.9	6.44	6.4
ENSMUSG00000025395.14	Prim1	PRIM1	1.75	5.98	1.76017e-08	8.84295e-07	6.86	5.11	6.96	6.75	5.17	5.05
ENSMUSG00000063882.12	Uqcrh	UQCRH	2.13	8.21	1.83768e-08	9.02612e-07	9.28	7.15	9.45	9.11	7.11	7.19
ENSMUSG00000029162.15	Khk	KHK	1.68	4.93	1.8389e-08	9.02612e-07	5.78	4.09	5.85	5.7	4.03	4.15
ENSMUSG00000043535.13	Setx	SETX	-1.47	6.72	1.81979e-08	9.00126e-07	5.99	7.46	5.94	6.04	7.47	7.45
ENSMUSG00000113061.1	Gm11361	GM11361	1.75	6.09	1.80634e-08	8.96938e-07	6.96	5.22	7.08	6.84	5.23	5.21
ENSMUSG00000074994.5	Qser1	QSER1	-1.49	5.09	1.86565e-08	9.05336e-07	4.35	5.84	4.38	4.32	5.84	5.83
ENSMUSG00000029765.12	Plxna4	PLXNA4	-3.86	2.18	1.42428e-08	8.28914e-07	0.27	4.11	0.47	0.02	4.02	4.19
ENSMUSG00000028358.15	Zfp618	ZFP618	-1.83	4.71	1.92672e-08	9.14195e-07	3.8	5.62	3.91	3.69	5.59	5.66
ENSMUSG00000039646.5	Vasn	VASN	-1.44	6.13	1.86448e-08	9.05336e-07	5.41	6.84	5.36	5.45	6.84	6.85
ENSMUSG00000002679.14	Med6	MED6	1.67	5.13	1.90219e-08	9.06648e-07	5.96	4.29	6.06	5.87	4.28	4.31
ENSMUSG00000022881.15	Rfc4	RFC4	1.44	5.68	1.87367e-08	9.05795e-07	6.4	4.96	6.43	6.38	5.01	4.91
ENSMUSG00000033379.13	Atp6v0b	ATP6V0B	1.79	7.23	1.90374e-08	9.06648e-07	8.12	6.34	8.25	8	6.36	6.32
ENSMUSG00000041782.14	Lad1	LAD1	-1.41	6.52	1.90018e-08	9.06648e-07	5.81	7.22	5.78	5.85	7.22	7.22
ENSMUSG00000024472.9	Dcp2	DCP2	-1.37	6.42	1.89982e-08	9.06648e-07	5.74	7.11	5.74	5.73	7.11	7.1
ENSMUSG00000024349.10	Tmem173	TMEM173	3.46	2.39	1.85884e-08	9.05336e-07	4.12	0.68	3.96	4.28	0.56	0.77
ENSMUSG00000026509.15	Capn2	CAPN2	-1.45	7	1.95182e-08	9.21662e-07	6.28	7.72	6.22	6.32	7.72	7.73
ENSMUSG00000038780.14	Smurf1	SMURF1	-1.4	6.22	1.95741e-08	9.21662e-07	5.52	6.92	5.55	5.49	6.93	6.91
ENSMUSG00000002957.11	Ap2a2	AP2A2	-1.46	7.45	1.99282e-08	9.21662e-07	6.72	8.18	6.68	6.76	8.19	8.16
ENSMUSG00000062380.4	Tubb3	TUBB3	-1.78	6.86	1.97882e-08	9.21662e-07	5.97	7.75	5.86	6.09	7.78	7.72
ENSMUSG00000032232.14	Cgnl1	CGNL1	-1.41	5.67	1.98689e-08	9.21662e-07	4.96	6.38	4.94	4.98	6.4	6.35
ENSMUSG00000039585.15	Myo9a	MYO9A	-1.41	5.65	1.98905e-08	9.21662e-07	4.94	6.36	4.97	4.91	6.36	6.35
ENSMUSG00000087260.5	Lamtor5	LAMTOR5	1.46	5.81	1.96602e-08	9.21662e-07	6.54	5.08	6.6	6.48	5.06	5.11
ENSMUSG00000068566.12	Myadm	MYADM	-1.44	6.23	2.00666e-08	9.24722e-07	5.52	6.96	5.48	5.55	7	6.92
ENSMUSG00000004798.14	Ulk2	ULK2	-1.48	5	2.06246e-08	9.4411e-07	4.27	5.74	4.24	4.28	5.72	5.76
ENSMUSG00000042035.11	Igsf3	IGSF3	-1.88	4.95	2.10768e-08	9.4411e-07	4.02	5.89	3.91	4.12	5.82	5.96
ENSMUSG00000054717.7	Hmgb2	HMGB2	1.59	7.99	2.09523e-08	9.4411e-07	8.79	7.2	8.86	8.71	7.19	7.21
ENSMUSG00000024044.18	Epb41l3	EPB41L3	-1.53	5.07	2.10544e-08	9.4411e-07	4.31	5.84	4.25	4.37	5.83	5.85
ENSMUSG00000042364.11	Snx18	SNX18	-1.38	6.79	2.0862e-08	9.4411e-07	6.1	7.47	6.07	6.12	7.47	7.48
ENSMUSG00000031004.8	Mki67	MKI67	-1.71	6.74	2.1044e-08	9.4411e-07	5.88	7.59	5.98	5.78	7.63	7.55
ENSMUSG00000019189.13	Rnf145	RNF145	-1.4	6.54	2.09739e-08	9.4411e-07	5.84	7.24	5.84	5.83	7.28	7.2
ENSMUSG00000034473.14	Sec22a	SEC22A	1.48	5.04	2.11765e-08	9.45267e-07	5.79	4.3	5.84	5.73	4.3	4.31
ENSMUSG00000039640.7	Mrpl12	MRPL12	1.59	6.93	2.10092e-08	9.4411e-07	7.73	6.13	7.81	7.65	6.09	6.18
ENSMUSG00000026958.13	Dpp7	DPP7	1.52	4.87	2.14009e-08	9.51968e-07	5.63	4.11	5.68	5.57	4.1	4.12
ENSMUSG00000029089.8	5730480H06Rik	5730480H06RIK	1.52	4.66	2.19991e-08	9.54682e-07	5.43	3.91	5.48	5.37	3.91	3.9
ENSMUSG00000022130.10	Tgds	TGDS	1.73	4.73	2.2057e-08	9.54682e-07	5.6	3.87	5.69	5.5	3.87	3.87
ENSMUSG00000022090.10	Pdlim2	PDLIM2	2.28	2.41	2.24014e-08	9.59815e-07	3.55	1.29	3.55	3.55	1.27	1.29
ENSMUSG00000021290.6	Atp5mpl	ATP5MPL	2.01	6.7	2.16994e-08	9.54682e-07	7.7	5.7	7.87	7.54	5.68	5.71
ENSMUSG00000012483.4	Rpa3	RPA3	2.28	5.35	2.20425e-08	9.54682e-07	6.49	4.21	6.68	6.3	4.2	4.21
ENSMUSG00000030218.2	Mgp	MGP	2.4	2.99	2.36048e-08	9.66132e-07	4.2	1.8	4.25	4.13	1.64	1.95
ENSMUSG00000057506.5	Bloc1s2	BLOC1S2	1.64	5.31	2.20402e-08	9.54682e-07	6.13	4.49	6.23	6.04	4.46	4.52
ENSMUSG00000024067.14	Dpy30	DPY30	1.92	5.97	2.19383e-08	9.54682e-07	6.93	5.01	7.07	6.79	5.07	4.95
ENSMUSG00000020674.17	Pxdn	PXDN	-1.55	6.96	2.21911e-08	9.57208e-07	6.19	7.74	6.11	6.27	7.73	7.75
ENSMUSG00000037815.7	Ctnna1	CTNNA1	-1.82	8.24	2.28213e-08	9.66132e-07	7.33	9.15	7.22	7.44	9.12	9.18
ENSMUSG00000051355.18	Commd1	COMMD1	1.52	5.72	2.19579e-08	9.54682e-07	6.47	4.96	6.55	6.4	4.99	4.92
ENSMUSG00000048701.13	Ccdc6	CCDC6	-1.39	5.83	2.22689e-08	9.57339e-07	5.13	6.53	5.15	5.11	6.55	6.5
ENSMUSG00000017188.3	Coa3	COA3	1.66	6.21	2.20581e-08	9.54682e-07	7.04	5.39	7.15	6.93	5.36	5.41
ENSMUSG00000030884.12	Uqcrc2	UQCRC2	1.48	7.8	2.27035e-08	9.66132e-07	8.54	7.06	8.59	8.49	7.04	7.08
ENSMUSG00000047497.10	Adamts12	ADAMTS12	-2.14	3.61	2.4246e-08	9.66132e-07	2.54	4.67	2.6	2.47	4.6	4.75
ENSMUSG00000021709.14	Erbin	ERBIN	-1.59	8.16	2.32814e-08	9.66132e-07	7.37	8.96	7.31	7.43	8.92	8.99
ENSMUSG00000025465.13	Echs1	ECHS1	1.67	7.07	2.28383e-08	9.66132e-07	7.9	6.23	8.01	7.8	6.2	6.26
ENSMUSG00000036223.16	Ska1	SKA1	1.8	3.76	2.4432e-08	9.66132e-07	4.66	2.87	4.72	4.6	2.91	2.82
ENSMUSG00000027942.16	4933434E20Rik	4933434E20RIK	1.35	6.87	2.28921e-08	9.66132e-07	7.54	6.2	7.57	7.52	6.19	6.2
ENSMUSG00000070639.5	Lrrc8b	LRRC8B	-1.61	6.14	2.32186e-08	9.66132e-07	5.34	6.94	5.24	5.43	6.95	6.93
ENSMUSG00000022565.15	Plec	PLEC	-2.37	8.92	2.43111e-08	9.66132e-07	7.73	10.11	7.91	7.55	10.11	10.1
ENSMUSG00000035168.16	Tanc1	TANC1	-1.38	6.48	2.31823e-08	9.66132e-07	5.8	7.18	5.83	5.76	7.16	7.19
ENSMUSG00000035901.14	Dennd5a	DENND5A	-1.36	7.01	2.34139e-08	9.66132e-07	6.34	7.69	6.33	6.34	7.7	7.68
ENSMUSG00000061859.17	Patj	PATJ	-1.6	4.79	2.43285e-08	9.66132e-07	4	5.59	4.05	3.93	5.55	5.63
ENSMUSG00000059248.13	2021-09-09	44448	-1.5	7.22	2.38465e-08	9.66132e-07	6.47	7.97	6.41	6.54	7.95	7.99
ENSMUSG00000037795.14	N4bp2	N4BP2	-1.51	4.82	2.45096e-08	9.66132e-07	4.06	5.58	4.06	4.07	5.54	5.61
ENSMUSG00000044408.7	Sptssa	SPTSSA	1.67	6.74	2.36013e-08	9.66132e-07	7.58	5.9	7.69	7.46	5.88	5.93
ENSMUSG00000018906.14	P4ha2	P4HA2	-1.98	6.82	2.38712e-08	9.66132e-07	5.84	7.81	5.7	5.97	7.73	7.89
ENSMUSG00000049800.13	Sertad2	SERTAD2	-1.52	5.22	2.41995e-08	9.66132e-07	4.46	5.98	4.53	4.39	5.99	5.97
ENSMUSG00000064210.7	Ano6	ANO6	-1.47	5.94	2.41274e-08	9.66132e-07	5.21	6.67	5.14	5.27	6.66	6.68
ENSMUSG00000034168.7	Irf2bpl	IRF2BPL	-1.38	6.8	2.41503e-08	9.66132e-07	6.11	7.49	6.1	6.11	7.45	7.53
ENSMUSG00000058761.5	Rnf169	RNF169	-1.71	5.94	2.44022e-08	9.66132e-07	5.08	6.8	5.2	4.97	6.77	6.81
ENSMUSG00000021712.15	Trim23	TRIM23	1.31	5.98	2.39728e-08	9.66132e-07	6.64	5.33	6.66	6.62	5.34	5.32
ENSMUSG00000040034.15	Nup43	NUP43	1.47	5.67	2.41569e-08	9.66132e-07	6.4	4.94	6.47	6.34	4.98	4.89
ENSMUSG00000022139.17	Mbnl2	MBNL2	-1.34	6.72	2.4394e-08	9.66132e-07	6.05	7.4	6.07	6.04	7.39	7.41
ENSMUSG00000035152.14	Ap2b1	AP2B1	-1.74	6.72	2.45042e-08	9.66132e-07	5.85	7.59	5.73	5.97	7.6	7.59
ENSMUSG00000066149.11	Cdc26	CDC26	1.59	6.27	2.42139e-08	9.66132e-07	7.06	5.47	7.16	6.96	5.44	5.5
ENSMUSG00000034297.14	Med13	MED13	-1.57	6.21	2.47917e-08	9.72763e-07	5.42	7	5.51	5.34	7.04	6.95
ENSMUSG00000022390.11	Zc3h7b	ZC3H7B	-1.42	6.11	2.48297e-08	9.72763e-07	5.39	6.82	5.45	5.34	6.82	6.82
ENSMUSG00000030291.12	Med21	MED21	1.81	5.97	2.53273e-08	9.86296e-07	6.88	5.06	7.01	6.74	5.1	5.03
ENSMUSG00000032481.17	Smarcc1	SMARCC1	-1.43	7.39	2.59414e-08	9.96574e-07	6.67	8.11	6.64	6.71	8.14	8.08
ENSMUSG00000007476.18	Lrrc8a	LRRC8A	-1.49	5.24	2.65132e-08	1.00491e-06	4.49	5.98	4.47	4.51	6.04	5.93
ENSMUSG00000027133.3	Nop10	NOP10	1.84	6.78	2.5934e-08	9.96574e-07	7.7	5.86	7.84	7.55	5.88	5.84
ENSMUSG00000001552.14	Jup	JUP	-1.43	6.26	2.60301e-08	9.96574e-07	5.54	6.98	5.49	5.6	6.95	7.01
ENSMUSG00000024074.8	Crim1	CRIM1	-1.36	6.73	2.60598e-08	9.96574e-07	6.05	7.41	6.06	6.04	7.44	7.38
ENSMUSG00000020163.12	Uqcr11	UQCR11	1.55	7.56	2.64531e-08	1.00491e-06	8.34	6.78	8.42	8.25	6.75	6.81
ENSMUSG00000020485.14	Supt4a	SUPT4A	1.7	6.1	2.58939e-08	9.96574e-07	6.95	5.25	7.07	6.82	5.24	5.26
ENSMUSG00000041734.15	Kirrel	KIRREL	-1.41	6.62	2.61529e-08	9.97159e-07	5.92	7.33	5.95	5.88	7.38	7.28
ENSMUSG00000073489.6	Ifi204	IFI204	-1.74	4.96	2.74074e-08	1.01186e-06	4.09	5.83	4	4.18	5.76	5.89
ENSMUSG00000035847.15	Ids	IDS	-1.63	4.13	2.84165e-08	1.01802e-06	3.32	4.95	3.29	3.35	4.97	4.93
ENSMUSG00000051675.13	Trim32	TRIM32	-1.52	5.48	2.69623e-08	1.01186e-06	4.72	6.24	4.64	4.8	6.22	6.26
ENSMUSG00000019689.4	Fmc1	FMC1	1.91	4.27	2.80613e-08	1.01802e-06	5.22	3.32	5.34	5.1	3.3	3.32
ENSMUSG00000055485.6	Soga1	SOGA1	-1.64	5.21	2.7392e-08	1.01186e-06	4.38	6.03	4.49	4.28	6.02	6.04
ENSMUSG00000003032.8	Klf4	KLF4	-1.82	5.67	2.73896e-08	1.01186e-06	4.77	6.58	4.65	4.88	6.5	6.66
ENSMUSG00000029502.14	Golga3	GOLGA3	-1.48	5.96	2.72619e-08	1.01186e-06	5.22	6.7	5.29	5.15	6.68	6.72
ENSMUSG00000026667.14	Uhmk1	UHMK1	-1.38	6.29	2.718e-08	1.01186e-06	5.61	6.98	5.63	5.57	7.02	6.95
ENSMUSG00000038244.14	Mical2	MICAL2	-1.66	7.6	2.77372e-08	1.01802e-06	6.77	8.43	6.86	6.67	8.45	8.41
ENSMUSG00000021884.18	Hacl1	HACL1	1.91	3.34	2.96937e-08	1.01802e-06	4.29	2.4	4.25	4.34	2.32	2.47
ENSMUSG00000024085.13	Man2a1	MAN2A1	-1.34	5.97	2.72928e-08	1.01186e-06	5.3	6.64	5.29	5.3	6.67	6.61
ENSMUSG00000045328.11	Cenpe	CENPE	-1.39	6.33	2.72985e-08	1.01186e-06	5.63	7.03	5.67	5.6	7.07	6.99
ENSMUSG00000026605.14	Cenpf	CENPF	-1.37	6.34	2.7341e-08	1.01186e-06	5.66	7.02	5.69	5.61	7.04	7
ENSMUSG00000032348.6	Gsta4	GSTA4	1.61	4.1	2.89516e-08	1.01802e-06	4.92	3.3	4.88	4.95	3.35	3.24
ENSMUSG00000072812.4	Ahnak2	AHNAK2	-1.96	6.33	2.79175e-08	1.01802e-06	5.36	7.31	5.48	5.22	7.22	7.4
ENSMUSG00000022013.4	Dnajc15	DNAJC15	2.28	4.77	2.87971e-08	1.01802e-06	5.91	3.63	6.08	5.74	3.71	3.55
ENSMUSG00000025504.14	Eps8l2	EPS8L2	-1.39	5.37	2.82911e-08	1.01802e-06	4.67	6.06	4.71	4.64	6.05	6.08
ENSMUSG00000024639.5	Gnaq	GNAQ	-1.48	4.74	2.90389e-08	1.01802e-06	4	5.48	3.99	4.01	5.51	5.45
ENSMUSG00000027750.16	Postn	POSTN	-2.82	1.97	2.54061e-08	9.86296e-07	0.57	3.38	0.56	0.57	3.35	3.4
ENSMUSG00000115219.2	Eef1akmt4	EEF1AKMT4	1.46	4.66	2.87394e-08	1.01802e-06	5.39	3.93	5.43	5.35	3.95	3.91
ENSMUSG00000036565.7	Ttyh3	TTYH3	-1.39	5.58	2.8318e-08	1.01802e-06	4.89	6.28	4.93	4.84	6.27	6.29
ENSMUSG00000002014.12	Ssr4	SSR4	1.67	7.19	2.82155e-08	1.01802e-06	8.02	6.35	8.14	7.9	6.35	6.35
ENSMUSG00000030172.15	Erc1	ERC1	-1.51	4.72	2.93205e-08	1.01802e-06	3.96	5.47	4.02	3.91	5.47	5.47
ENSMUSG00000052533.14	Nup188	NUP188	-1.33	6.1	2.81746e-08	1.01802e-06	5.43	6.77	5.44	5.42	6.79	6.74
ENSMUSG00000057409.7	Zfp53	ZFP53	1.68	5.42	2.81535e-08	1.01802e-06	6.27	4.58	6.38	6.16	4.54	4.62
ENSMUSG00000039145.16	Camk1d	CAMK1D	-1.73	3.65	3.09978e-08	1.02086e-06	2.8	4.53	2.79	2.78	4.52	4.52
ENSMUSG00000028649.19	Macf1	MACF1	-1.67	8.02	2.93783e-08	1.01802e-06	7.19	8.86	7.28	7.09	8.87	8.85
ENSMUSG00000045438.12	Cox19	COX19	1.68	5.5	2.84458e-08	1.01802e-06	6.34	4.66	6.45	6.22	4.68	4.64
ENSMUSG00000031722.10	Hp	HP	5.83	1.05	1.14458e-08	8.08421e-07	3.96	-1.77	3.83	4.09	-2.17	-1.54
ENSMUSG00000039005.13	Tlr4	TLR4	1.34	5.06	2.90944e-08	1.01802e-06	5.72	4.38	5.7	5.75	4.38	4.39
ENSMUSG00000042396.10	Rbm7	RBM7	1.7	7.2	2.91173e-08	1.01802e-06	8.05	6.35	8.17	7.93	6.31	6.39
ENSMUSG00000027737.10	Slc7a11	SLC7A11	-2.03	3.14	3.18533e-08	1.03123e-06	2.13	4.16	2.09	2.16	4.2	4.12
ENSMUSG00000021213.12	Akr1c13	AKR1C13	1.65	5.62	2.89757e-08	1.01802e-06	6.45	4.8	6.56	6.33	4.8	4.79
ENSMUSG00000033952.14	Aspm	ASPM	-1.4	6.21	2.91843e-08	1.01802e-06	5.5	6.91	5.55	5.46	6.94	6.87
ENSMUSG00000106918.3	Mrpl33	MRPL33	2.06	7.38	2.95097e-08	1.01802e-06	8.41	6.35	8.59	8.23	6.37	6.33
ENSMUSG00000004285.12	Atp6v1f	ATP6V1F	1.61	7.02	2.93834e-08	1.01802e-06	7.82	6.21	7.93	7.71	6.21	6.22
ENSMUSG00000001089.14	Luzp1	LUZP1	-1.33	6.86	2.94865e-08	1.01802e-06	6.2	7.53	6.22	6.17	7.55	7.51
ENSMUSG00000020671.9	Rab10	RAB10	-1.51	6.78	2.96941e-08	1.01802e-06	6.02	7.53	5.94	6.1	7.54	7.52
ENSMUSG00000044080.9	S100a1	S100A1	1.6	5.07	2.98992e-08	1.01802e-06	5.87	4.27	5.96	5.77	4.25	4.29
ENSMUSG00000031540.13	Kat6a	KAT6A	-1.55	5.16	3.04595e-08	1.01802e-06	4.38	5.94	4.47	4.29	5.92	5.95
ENSMUSG00000026088.15	Mitd1	MITD1	1.5	4.5	3.07951e-08	1.02086e-06	5.25	3.75	5.31	5.2	3.75	3.76
ENSMUSG00000024304.14	Cdh2	CDH2	-1.57	6.68	2.98014e-08	1.01802e-06	5.89	7.46	5.8	5.99	7.47	7.45
ENSMUSG00000005034.15	Prkacb	PRKACB	-1.37	5.77	2.99079e-08	1.01802e-06	5.08	6.46	5.04	5.13	6.45	6.47
ENSMUSG00000027088.10	Phospho2	PHOSPHO2	1.58	5.08	3.01055e-08	1.01802e-06	5.87	4.29	5.96	5.78	4.32	4.26
ENSMUSG00000033863.2	Klf9	KLF9	-1.43	5.74	3.02284e-08	1.01802e-06	5.03	6.46	4.98	5.07	6.41	6.5
ENSMUSG00000091512.5	Lamtor3	LAMTOR3	1.54	6.27	2.97814e-08	1.01802e-06	7.04	5.49	7.14	6.94	5.47	5.52
ENSMUSG00000025007.13	Aldh18a1	ALDH18A1	-1.52	6.92	3.04164e-08	1.01802e-06	6.16	7.68	6.08	6.24	7.66	7.69
ENSMUSG00000026596.13	Abl2	ABL2	-1.33	6.97	3.05142e-08	1.01802e-06	6.3	7.63	6.32	6.29	7.66	7.61
ENSMUSG00000022895.16	Ets2	ETS2	-1.31	6.34	3.04131e-08	1.01802e-06	5.69	6.99	5.69	5.69	6.97	7.02
ENSMUSG00000051232.13	Tmem199	TMEM199	1.57	5.56	3.03112e-08	1.01802e-06	6.35	4.77	6.45	6.24	4.78	4.76
ENSMUSG00000027900.15	Dram2	DRAM2	1.4	5.02	3.09576e-08	1.02086e-06	5.71	4.32	5.75	5.68	4.28	4.36
ENSMUSG00000021361.7	Tmem14c	TMEM14C	1.49	6.22	3.03689e-08	1.01802e-06	6.96	5.47	7.05	6.87	5.49	5.45
ENSMUSG00000031960.14	Aars	AARS	-1.35	7.33	3.12711e-08	1.02459e-06	6.65	8	6.64	6.67	8.02	7.98
ENSMUSG00000052534.15	Pbx1	PBX1	-1.38	7.59	3.14821e-08	1.02887e-06	6.9	8.28	6.89	6.91	8.24	8.31
ENSMUSG00000032612.14	Usp4	USP4	-1.33	6.26	3.09786e-08	1.02086e-06	5.6	6.93	5.57	5.63	6.95	6.91
ENSMUSG00000031309.15	Rps6ka3	RPS6KA3	-1.95	4.51	3.30854e-08	1.03261e-06	3.54	5.48	3.41	3.66	5.41	5.56
ENSMUSG00000040112.9	Mrps35	MRPS35	1.51	6.13	3.08125e-08	1.02086e-06	6.88	5.38	6.97	6.79	5.36	5.39
ENSMUSG00000057706.7	Mex3b	MEX3B	-1.41	4.89	3.23973e-08	1.03123e-06	4.18	5.59	4.21	4.15	5.58	5.6
ENSMUSG00000051343.11	Rab11fip5	RAB11FIP5	-1.58	5.12	3.22153e-08	1.03123e-06	4.33	5.92	4.23	4.43	5.93	5.9
ENSMUSG00000034345.14	Gtf2h5	GTF2H5	1.5	5.93	3.12109e-08	1.02459e-06	6.69	5.18	6.78	6.59	5.18	5.18
ENSMUSG00000043510.12	Hscb	HSCB	1.7	4.32	3.31417e-08	1.03261e-06	5.17	3.47	5.26	5.08	3.45	3.49
ENSMUSG00000029992.14	Gfpt1	GFPT1	-1.46	6.13	3.16409e-08	1.03024e-06	5.4	6.87	5.33	5.47	6.84	6.89
ENSMUSG00000041324.14	Inhba	INHBA	-1.46	6.04	3.16847e-08	1.03024e-06	5.31	6.78	5.36	5.26	6.83	6.72
ENSMUSG00000022893.14	Adamts1	ADAMTS1	-1.57	5.98	3.2082e-08	1.03123e-06	5.21	6.77	5.3	5.1	6.74	6.79
ENSMUSG00000027430.12	Dtd1	DTD1	1.33	5.05	3.24649e-08	1.03123e-06	5.71	4.38	5.7	5.72	4.35	4.41
ENSMUSG00000017801.15	Mlx	MLX	1.36	5.37	3.21152e-08	1.03123e-06	6.05	4.7	6.1	6	4.7	4.69
ENSMUSG00000028960.19	Ube4b	UBE4B	-1.44	6.48	3.2347e-08	1.03123e-06	5.76	7.2	5.82	5.69	7.23	7.16
ENSMUSG00000035181.6	Heatr5a	HEATR5A	-1.44	5.57	3.27043e-08	1.03261e-06	4.86	6.29	4.9	4.8	6.34	6.24
ENSMUSG00000025059.16	Gk	GK	1.47	4.18	3.41666e-08	1.05218e-06	4.92	3.45	4.91	4.92	3.47	3.43
ENSMUSG00000022812.14	Gsk3b	GSK3B	-1.42	5.94	3.24911e-08	1.03123e-06	5.23	6.65	5.3	5.16	6.65	6.65
ENSMUSG00000048960.13	Prex2	PREX2	-1.31	6.36	3.24043e-08	1.03123e-06	5.7	7.02	5.72	5.69	7.04	6.99
ENSMUSG00000034621.14	Gpatch8	GPATCH8	-1.33	5.33	3.30159e-08	1.03261e-06	4.66	5.99	4.67	4.65	6	5.98
ENSMUSG00000001039.12	B9d1	B9D1	2.18	3.5	3.56774e-08	1.07798e-06	4.59	2.41	4.71	4.46	2.47	2.35
ENSMUSG00000042650.3	Alkbh5	ALKBH5	-1.57	7.25	3.29725e-08	1.03261e-06	6.46	8.03	6.37	6.56	8.03	8.03
ENSMUSG00000029101.16	Rgs12	RGS12	-1.32	5.74	3.28651e-08	1.03261e-06	5.08	6.39	5.05	5.1	6.39	6.4
ENSMUSG00000025204.10	Ndufb8	NDUFB8	1.88	7.22	3.30186e-08	1.03261e-06	8.16	6.28	8.32	8	6.26	6.3
ENSMUSG00000035171.9	1110059E24Rik	1110059E24RIK	1.68	5.94	3.25204e-08	1.03123e-06	6.78	5.1	6.9	6.65	5.08	5.12
ENSMUSG00000006567.11	Atp7b	ATP7B	-2.36	2.95	3.62659e-08	1.08299e-06	1.78	4.14	1.74	1.8	4.05	4.23
ENSMUSG00000049550.17	Clip1	CLIP1	-1.3	6.91	3.34585e-08	1.03786e-06	6.27	7.56	6.25	6.28	7.57	7.56
ENSMUSG00000070056.6	Mfhas1	MFHAS1	-1.58	4.91	3.46783e-08	1.06283e-06	4.12	5.7	4.17	4.07	5.77	5.63
ENSMUSG00000060477.14	Irak2	IRAK2	1.51	5.56	3.32086e-08	1.03261e-06	6.31	4.8	6.41	6.22	4.8	4.8
ENSMUSG00000004677.17	Myo9b	MYO9B	-1.46	6.85	3.36055e-08	1.0399e-06	6.13	7.58	6.2	6.06	7.56	7.61
ENSMUSG00000047126.17	Cltc	CLTC	-1.57	8.32	3.4936e-08	1.06563e-06	7.54	9.1	7.46	7.61	9.12	9.08
ENSMUSG00000020167.14	Tcf3	TCF3	-1.35	6.93	3.39078e-08	1.04673e-06	6.25	7.61	6.3	6.2	7.6	7.61
ENSMUSG00000055013.15	Agap1	AGAP1	-1.45	5.45	3.50599e-08	1.06687e-06	4.73	6.18	4.8	4.65	6.17	6.19
ENSMUSG00000050578.10	Mmp13	MMP13	4.59	2.39	3.42646e-08	1.05267e-06	4.69	0.13	4.88	4.49	-0.22	0.43
ENSMUSG00000050323.14	Ndufaf6	NDUFAF6	2.23	3.44	3.84047e-08	1.09132e-06	4.56	2.33	4.69	4.43	2.41	2.25
ENSMUSG00000036751.7	Cox6b1	COX6B1	1.43	7.84	3.56443e-08	1.07798e-06	8.55	7.13	8.61	8.49	7.14	7.12
ENSMUSG00000034295.10	Fhod3	FHOD3	-1.64	4.39	3.72318e-08	1.08514e-06	3.57	5.21	3.51	3.63	5.16	5.27
ENSMUSG00000036850.4	Mrpl41	MRPL41	1.94	5.08	3.54829e-08	1.07718e-06	6.04	4.11	6.2	5.89	4.11	4.1
ENSMUSG00000021764.8	Ndufs4	NDUFS4	1.77	6.51	3.48934e-08	1.06563e-06	7.39	5.63	7.54	7.25	5.65	5.61
ENSMUSG00000021457.14	Syk	SYK	-2.19	2.68	3.8457e-08	1.09132e-06	1.6	3.79	1.52	1.65	3.78	3.77
ENSMUSG00000056313.5	Tcim	TCIM	2.25	4.06	3.82073e-08	1.09132e-06	5.19	2.95	5.35	5.02	2.88	2.99
ENSMUSG00000071528.4	Atp5md	ATP5MD	2.02	7.27	3.59026e-08	1.07963e-06	8.29	6.27	8.47	8.09	6.25	6.28
ENSMUSG00000021464.14	Ror2	ROR2	-1.43	4.66	3.73772e-08	1.08514e-06	3.95	5.38	3.92	3.98	5.37	5.39
ENSMUSG00000004383.18	Large1	LARGE1	-1.37	6.28	3.58334e-08	1.07963e-06	5.59	6.96	5.55	5.64	6.93	7
ENSMUSG00000021690.10	Jmy	JMY	-1.39	5.43	3.64623e-08	1.0838e-06	4.73	6.12	4.71	4.75	6.07	6.17
ENSMUSG00000007655.16	Cav1	CAV1	-1.58	6.22	3.60693e-08	1.07963e-06	5.44	7.01	5.34	5.54	7.05	6.97
ENSMUSG00000055322.15	Tns1	TNS1	-1.49	5.22	3.69114e-08	1.08514e-06	4.47	5.96	4.56	4.39	5.97	5.96
ENSMUSG00000019738.15	Polr2i	POLR2I	1.43	4.57	3.73102e-08	1.08514e-06	5.29	3.86	5.33	5.24	3.84	3.87
ENSMUSG00000020974.6	Pole2	POLE2	1.41	4.36	3.77645e-08	1.08964e-06	5.07	3.66	5.09	5.05	3.66	3.65
ENSMUSG00000033396.13	Spg11	SPG11	-1.3	5.41	3.67263e-08	1.08514e-06	4.76	6.06	4.77	4.75	6.06	6.07
ENSMUSG00000029776.11	Hibadh	HIBADH	1.36	5.57	3.60224e-08	1.07963e-06	6.25	4.89	6.22	6.28	4.84	4.95
ENSMUSG00000058881.13	Zfp516	ZFP516	-1.29	6.71	3.63839e-08	1.0838e-06	6.07	7.36	6.09	6.05	7.34	7.37
ENSMUSG00000018821.3	Avpi1	AVPI1	1.87	7.45	3.69381e-08	1.08514e-06	8.38	6.51	8.53	8.23	6.47	6.56
ENSMUSG00000042453.14	Reln	RELN	-3.73	1.38	2.53681e-08	9.86296e-07	-0.46	3.25	-0.37	-0.62	3.18	3.31
ENSMUSG00000067148.15	Polr1c	POLR1C	1.31	7.29	3.67975e-08	1.08514e-06	7.95	6.64	7.97	7.92	6.64	6.64
ENSMUSG00000025261.17	Huwe1	HUWE1	-1.7	7.61	3.7439e-08	1.08514e-06	6.75	8.46	6.87	6.64	8.48	8.43
ENSMUSG00000031529.5	Tnks	TNKS	-1.72	6	3.69521e-08	1.08514e-06	5.14	6.87	5.28	5.01	6.86	6.86
ENSMUSG00000040007.8	Bahd1	BAHD1	-1.41	4.79	3.85895e-08	1.09132e-06	4.08	5.49	4.11	4.05	5.52	5.47
ENSMUSG00000027800.14	Tm4sf1	TM4SF1	1.7	9.77	3.9839e-08	1.09894e-06	10.62	8.91	10.72	10.52	8.93	8.9
ENSMUSG00000026235.14	Epha4	EPHA4	-1.61	4.08	4.01835e-08	1.09894e-06	3.27	4.88	3.3	3.25	4.93	4.84
ENSMUSG00000013076.17	Amotl1	AMOTL1	-1.47	6.57	3.71813e-08	1.08514e-06	5.84	7.3	5.92	5.75	7.32	7.29
ENSMUSG00000031709.15	Tbc1d9	TBC1D9	-1.61	4	4.0403e-08	1.09894e-06	3.2	4.81	3.25	3.14	4.8	4.81
ENSMUSG00000023939.7	Mrpl14	MRPL14	1.68	5.4	3.72092e-08	1.08514e-06	6.24	4.56	6.35	6.13	4.49	4.63
ENSMUSG00000024294.14	Mib1	MIB1	-1.5	7.94	3.83936e-08	1.09132e-06	7.19	8.69	7.12	7.26	8.7	8.68
ENSMUSG00000005674.9	Tomm40l	TOMM40L	1.32	5.24	3.7599e-08	1.08732e-06	5.9	4.57	5.94	5.86	4.59	4.56
ENSMUSG00000049577.15	Zfpm1	ZFPM1	-1.87	3.47	4.20049e-08	1.10498e-06	2.54	4.4	2.56	2.5	4.35	4.46
ENSMUSG00000061175.11	Fnip2	FNIP2	-1.35	5.67	3.81783e-08	1.09132e-06	5	6.35	5.05	4.95	6.33	6.36
ENSMUSG00000047446.18	Arl4a	ARL4A	1.85	3.32	4.22578e-08	1.10708e-06	4.25	2.41	4.32	4.17	2.38	2.42
ENSMUSG00000021318.15	Gli3	GLI3	-1.68	4.96	3.96604e-08	1.09894e-06	4.12	5.8	4.21	4.04	5.88	5.73
ENSMUSG00000023026.16	Dip2b	DIP2B	-1.61	5.3	3.90935e-08	1.09351e-06	4.5	6.11	4.61	4.38	6.08	6.13
ENSMUSG00000039753.16	Fbxl5	FBXL5	1.35	7.52	3.87434e-08	1.09326e-06	8.2	6.84	8.24	8.15	6.84	6.84
ENSMUSG00000026796.16	Fam129b	FAM129B	-1.54	7.6	3.90571e-08	1.09351e-06	6.83	8.36	6.74	6.91	8.37	8.36
ENSMUSG00000028070.7	Naxe	NAXE	1.35	6	3.81277e-08	1.09132e-06	6.68	5.32	6.72	6.64	5.27	5.38
ENSMUSG00000040209.12	Zfp704	ZFP704	-1.62	5.82	3.90061e-08	1.09351e-06	5.01	6.62	5.13	4.89	6.61	6.64
ENSMUSG00000002728.14	Naa20	NAA20	1.79	6.49	3.83994e-08	1.09132e-06	7.38	5.6	7.53	7.24	5.65	5.54
ENSMUSG00000028601.18	Echdc2	ECHDC2	1.39	5.41	3.85442e-08	1.09132e-06	6.1	4.71	6.16	6.04	4.68	4.75
ENSMUSG00000067377.12	Tspan6	TSPAN6	1.57	4.14	4.11875e-08	1.10009e-06	4.93	3.36	4.99	4.86	3.33	3.38
ENSMUSG00000053819.16	Camk2d	CAMK2D	-1.41	5.39	3.94941e-08	1.09894e-06	4.69	6.09	4.73	4.64	6.05	6.14
ENSMUSG00000005054.7	Cstb	CSTB	1.66	7.09	3.90632e-08	1.09351e-06	7.92	6.26	8.05	7.79	6.24	6.28
ENSMUSG00000075706.10	Gpx4	GPX4	1.76	8.78	4.11356e-08	1.10009e-06	9.65	7.89	9.78	9.53	7.86	7.93
ENSMUSG00000049960.4	Mrps16	MRPS16	1.61	5.78	3.95736e-08	1.09894e-06	6.58	4.97	6.69	6.47	4.92	5.03
ENSMUSG00000044791.16	Setd2	SETD2	-1.28	6.48	3.98895e-08	1.09894e-06	5.84	7.12	5.87	5.8	7.13	7.11
ENSMUSG00000033499.14	Larp4b	LARP4B	-1.28	6.83	4.00879e-08	1.09894e-06	6.2	7.47	6.19	6.2	7.5	7.44
ENSMUSG00000024042.7	Sik1	SIK1	-1.57	4.88	4.18715e-08	1.10498e-06	4.1	5.66	4.2	4	5.64	5.69
ENSMUSG00000022283.15	Pabpc1	PABPC1	-1.38	8.35	4.19231e-08	1.10498e-06	7.66	9.04	7.67	7.66	9.01	9.07
ENSMUSG00000030879.10	Mrpl17	MRPL17	1.53	6.8	4.02175e-08	1.09894e-06	7.56	6.04	7.66	7.46	6.01	6.06
ENSMUSG00000040383.16	Aqr	AQR	-1.26	6.03	4.03824e-08	1.09894e-06	5.39	6.66	5.39	5.4	6.68	6.64
ENSMUSG00000089945.13	Pakap	PAKAP	-1.88	4.09	4.40477e-08	1.13666e-06	3.16	5.03	3.01	3.29	4.99	5.07
ENSMUSG00000072620.3	Slfn2	SLFN2	1.57	5.57	4.01799e-08	1.09894e-06	6.36	4.8	6.41	6.31	4.69	4.89
ENSMUSG00000072825.11	Cep170b	CEP170B	-1.54	6.65	4.0527e-08	1.09998e-06	5.88	7.42	5.98	5.78	7.4	7.44
ENSMUSG00000066152.11	Slc31a2	SLC31A2	1.54	3.78	4.40276e-08	1.13666e-06	4.55	3.02	4.55	4.55	3.04	2.99
ENSMUSG00000040850.17	Psme4	PSME4	-1.39	7.29	4.108e-08	1.10009e-06	6.59	7.98	6.53	6.65	8	7.97
ENSMUSG00000058240.14	Cryzl1	CRYZL1	1.3	6.17	4.01395e-08	1.09894e-06	6.82	5.52	6.86	6.78	5.49	5.55
ENSMUSG00000024646.14	Cyb5a	CYB5A	1.37	5.53	4.03856e-08	1.09894e-06	6.21	4.84	6.22	6.21	4.77	4.92
ENSMUSG00000036333.11	Kidins220	KIDINS220	-1.31	6.11	4.0852e-08	1.10009e-06	5.46	6.76	5.47	5.45	6.72	6.81
ENSMUSG00000024414.13	Mrpl27	MRPL27	1.34	5.25	4.11189e-08	1.10009e-06	5.92	4.57	5.97	5.87	4.6	4.54
ENSMUSG00000028149.12	Rap1gds1	RAP1GDS1	-1.43	6.15	4.11888e-08	1.10009e-06	5.44	6.87	5.39	5.49	6.93	6.8
ENSMUSG00000019979.12	Apaf1	APAF1	-1.56	6.59	4.12181e-08	1.10009e-06	5.8	7.37	5.71	5.9	7.32	7.42
ENSMUSG00000000826.16	Dnajc5	DNAJC5	-1.27	6.83	4.12101e-08	1.10009e-06	6.2	7.46	6.21	6.18	7.48	7.45
ENSMUSG00000031821.11	Gins2	GINS2	1.41	5.16	4.13172e-08	1.10045e-06	5.87	4.46	5.92	5.81	4.5	4.41
ENSMUSG00000019889.10	Ptprk	PTPRK	-1.31	7.26	4.16773e-08	1.10316e-06	6.61	7.92	6.59	6.62	7.95	7.88
ENSMUSG00000026698.8	Pigc	PIGC	1.43	5.17	4.15298e-08	1.10153e-06	5.88	4.46	5.96	5.81	4.44	4.48
ENSMUSG00000020392.8	Cdkn2aipnl	CDKN2AIPNL	1.23	5.96	4.15133e-08	1.10153e-06	6.58	5.35	6.57	6.58	5.32	5.37
ENSMUSG00000028556.15	Dock7	DOCK7	-1.29	6.39	4.22374e-08	1.10708e-06	5.75	7.04	5.71	5.78	7.03	7.04
ENSMUSG00000027035.10	Cers6	CERS6	-1.36	5.55	4.28123e-08	1.11932e-06	4.87	6.23	4.92	4.82	6.26	6.2
ENSMUSG00000004268.11	Emg1	EMG1	1.51	7.54	4.31433e-08	1.12558e-06	8.3	6.79	8.4	8.2	6.78	6.79
ENSMUSG00000039795.14	Zfand1	ZFAND1	1.46	5.08	4.32273e-08	1.12558e-06	5.81	4.36	5.89	5.73	4.32	4.39
ENSMUSG00000043079.17	Synpo	SYNPO	-1.94	3.98	4.73535e-08	1.17795e-06	3.01	4.95	3.04	2.97	4.84	5.05
ENSMUSG00000050148.9	Ubqln2	UBQLN2	-1.61	4.29	4.67808e-08	1.16824e-06	3.49	5.11	3.55	3.43	5.15	5.05
ENSMUSG00000060279.14	Ap2a1	AP2A1	-1.25	5.92	4.36221e-08	1.13126e-06	5.3	6.54	5.3	5.3	6.56	6.53
ENSMUSG00000060671.12	Atp8b2	ATP8B2	-1.24	6.12	4.35772e-08	1.13126e-06	5.5	6.74	5.49	5.51	6.73	6.75
ENSMUSG00000023089.12	Ndufa5	NDUFA5	1.29	4.95	4.45297e-08	1.14231e-06	5.6	4.3	5.62	5.57	4.31	4.3
ENSMUSG00000051391.9	Ywhag	YWHAG	-1.49	8.16	4.60133e-08	1.16494e-06	7.42	8.91	7.35	7.49	8.88	8.94
ENSMUSG00000024812.11	Tjp2	TJP2	-1.34	5.86	4.45833e-08	1.14231e-06	5.19	6.53	5.13	5.25	6.53	6.53
ENSMUSG00000004044.9	Cavin1	CAVIN1	-1.68	8.52	4.65292e-08	1.16824e-06	7.69	9.36	7.58	7.79	9.31	9.41
ENSMUSG00000073616.10	Cops9	COPS9	1.85	6.12	4.40967e-08	1.13666e-06	7.04	5.2	7.19	6.9	5.11	5.28
ENSMUSG00000025332.14	Kdm5c	KDM5C	-1.32	6.53	4.45356e-08	1.14231e-06	5.87	7.19	5.92	5.81	7.2	7.17
ENSMUSG00000045763.8	Basp1	BASP1	-1.3	6.91	4.47758e-08	1.14268e-06	6.27	7.56	6.23	6.3	7.54	7.58
ENSMUSG00000042462.4	Dctpp1	DCTPP1	1.65	6.78	4.47095e-08	1.14268e-06	7.61	5.95	7.74	7.47	5.98	5.92
ENSMUSG00000026429.9	Ube2t	UBE2T	1.82	4.1	4.81591e-08	1.1842e-06	5.01	3.19	5.13	4.89	3.17	3.21
ENSMUSG00000069114.8	Zbtb10	ZBTB10	-1.39	4.56	4.76006e-08	1.17952e-06	3.87	5.25	3.88	3.85	5.26	5.25
ENSMUSG00000025085.16	Ablim1	ABLIM1	-1.83	3.26	5.08293e-08	1.20812e-06	2.36	4.18	2.33	2.37	4.14	4.22
ENSMUSG00000024158.17	Hagh	HAGH	1.33	4.63	4.67336e-08	1.16824e-06	5.29	3.96	5.32	5.27	3.97	3.96
ENSMUSG00000024645.5	Timm21	TIMM21	1.41	5.42	4.52421e-08	1.15228e-06	6.12	4.71	6.21	6.04	4.72	4.71
ENSMUSG00000029557.7	Mrm2	MRM2	1.48	3.98	4.88903e-08	1.19302e-06	4.72	3.24	4.75	4.69	3.25	3.23
ENSMUSG00000041426.12	Hibch	HIBCH	1.55	4.47	4.75888e-08	1.17952e-06	5.25	3.69	5.33	5.16	3.67	3.71
ENSMUSG00000040957.15	Cables1	CABLES1	-1.96	3.57	5.11053e-08	1.20899e-06	2.6	4.55	2.55	2.63	4.47	4.64
ENSMUSG00000035441.14	Myo1d	MYO1D	-1.62	3.72	5.07584e-08	1.20812e-06	2.92	4.54	2.88	2.95	4.54	4.53
ENSMUSG00000016382.15	Pls3	PLS3	-1.67	6.82	4.61223e-08	1.16494e-06	5.99	7.66	5.86	6.11	7.63	7.69
ENSMUSG00000039967.14	Zfp292	ZFP292	-1.23	6.58	4.60107e-08	1.16494e-06	5.96	7.2	5.97	5.96	7.2	7.2
ENSMUSG00000039959.13	Hip1	HIP1	-1.26	7.12	4.64388e-08	1.16824e-06	6.49	7.75	6.5	6.48	7.76	7.73
ENSMUSG00000063760.9	Rnf217	RNF217	-1.26	5.55	4.66304e-08	1.16824e-06	4.93	6.19	4.94	4.91	6.19	6.18
ENSMUSG00000002731.6	Prkra	PRKRA	1.33	5.48	4.60431e-08	1.16494e-06	6.14	4.82	6.2	6.09	4.8	4.84
ENSMUSG00000004945.15	Tmem242	TMEM242	1.6	5.59	4.61938e-08	1.16494e-06	6.39	4.8	6.51	6.28	4.76	4.83
ENSMUSG00000031778.13	Cx3cl1	CX3CL1	-1.87	3.47	5.27374e-08	1.2255e-06	2.54	4.41	2.43	2.64	4.38	4.43
ENSMUSG00000035914.11	Cd276	CD276	-1.36	5.99	4.70907e-08	1.1737e-06	5.3	6.67	5.24	5.37	6.64	6.7
ENSMUSG00000031990.15	Jam3	JAM3	1.4	4.98	4.76953e-08	1.17958e-06	5.68	4.28	5.75	5.61	4.29	4.27
ENSMUSG00000060121.15	Gemin2	GEMIN2	1.59	3.99	5.07162e-08	1.20812e-06	4.78	3.2	4.85	4.71	3.18	3.21
ENSMUSG00000073676.4	Hspe1	HSPE1	1.99	8.6	4.96517e-08	1.19738e-06	9.59	7.61	9.77	9.42	7.66	7.55
ENSMUSG00000019948.4	Actr6	ACTR6	1.53	4.29	5.04071e-08	1.20766e-06	5.05	3.52	5.13	4.98	3.54	3.51
ENSMUSG00000041482.17	Piezo2	PIEZO2	-1.63	5.82	4.83345e-08	1.18623e-06	5.02	6.64	5.13	4.9	6.58	6.7
ENSMUSG00000020580.10	Rock2	ROCK2	-1.27	6.8	4.8112e-08	1.1842e-06	6.16	7.44	6.14	6.18	7.47	7.4
ENSMUSG00000046079.16	Lrrc8d	LRRC8D	-1.31	5.02	4.95685e-08	1.19738e-06	4.37	5.67	4.34	4.39	5.68	5.67
ENSMUSG00000045095.16	Magi1	MAGI1	-1.43	5.6	4.87491e-08	1.19302e-06	4.88	6.31	4.97	4.8	6.31	6.32
ENSMUSG00000029462.18	Vps29	VPS29	1.71	7.63	4.95081e-08	1.19738e-06	8.48	6.77	8.63	8.34	6.77	6.77
ENSMUSG00000026032.8	Ndufb3	NDUFB3	1.26	5.69	4.81099e-08	1.1842e-06	6.31	5.06	6.36	6.27	5.04	5.08
ENSMUSG00000027384.6	Ndufaf5	NDUFAF5	1.73	4.07	5.23346e-08	1.2255e-06	4.94	3.21	5.04	4.83	3.24	3.18
ENSMUSG00000050359.7	Sprr1a	SPRR1A	-1.67	6.99	4.91824e-08	1.19738e-06	6.16	7.83	6.03	6.28	7.79	7.86
ENSMUSG00000040836.15	Gpr161	GPR161	-1.38	4.6	5.14602e-08	1.2141e-06	3.91	5.29	3.92	3.89	5.3	5.27
ENSMUSG00000026083.12	Eif5b	EIF5B	-1.26	6.06	4.88471e-08	1.19302e-06	5.42	6.69	5.39	5.46	6.69	6.68
ENSMUSG00000089951.8	Gm14435	GM14435	2.28	2.07	5.38128e-08	1.2255e-06	3.21	0.95	3.2	3.22	0.86	1.01
ENSMUSG00000054863.9	Tafa5	TAFA5	-1.58	4.02	5.36696e-08	1.2255e-06	3.23	4.81	3.22	3.24	4.86	4.76
ENSMUSG00000039844.19	Rapgef1	RAPGEF1	-1.48	6.37	4.94683e-08	1.19738e-06	5.63	7.12	5.72	5.54	7.15	7.08
ENSMUSG00000016128.14	Stard13	STARD13	-1.27	6.27	4.97233e-08	1.19738e-06	5.63	6.91	5.68	5.59	6.91	6.9
ENSMUSG00000070394.10	Tmem256	TMEM256	2.19	5.64	4.99417e-08	1.20038e-06	6.74	4.55	6.93	6.55	4.44	4.66
ENSMUSG00000031432.3	Prps1	PRPS1	1.36	6.34	4.95265e-08	1.19738e-06	7.02	5.66	7.07	6.96	5.72	5.61
ENSMUSG00000078897.10	Gm4724	GM4724	1.88	5.21	5.06507e-08	1.20812e-06	6.15	4.27	6.29	6.01	4.36	4.17
ENSMUSG00000058586.12	Serhl	SERHL	1.7	3.87	5.4622e-08	1.2255e-06	4.71	3.02	4.8	4.63	2.96	3.07
ENSMUSG00000038615.17	Nfe2l1	NFE2L1	-1.36	6.9	5.04331e-08	1.20766e-06	6.22	7.58	6.15	6.29	7.59	7.57
ENSMUSG00000034903.18	Cobll1	COBLL1	-1.48	4.22	5.51319e-08	1.22655e-06	3.48	4.96	3.53	3.44	4.95	4.98
ENSMUSG00000022000.11	Zc3h13	ZC3H13	-1.66	4.49	5.45252e-08	1.2255e-06	3.65	5.31	3.78	3.53	5.31	5.32
ENSMUSG00000029528.19	Pxn	PXN	-1.22	6.6	5.10539e-08	1.20899e-06	6	7.21	5.99	6	7.21	7.21
ENSMUSG00000046841.5	Ckap4	CKAP4	-1.24	6.7	5.11494e-08	1.20899e-06	6.08	7.33	6.05	6.11	7.33	7.32
ENSMUSG00000042680.8	Garem1	GAREM1	-1.88	3.17	5.84695e-08	1.25051e-06	2.24	4.11	2.21	2.25	4.15	4.06
ENSMUSG00000031767.13	Nudt7	NUDT7	1.75	3.2	5.81241e-08	1.24716e-06	4.08	2.34	4.13	4.02	2.3	2.36
ENSMUSG00000071076.6	Jund	JUND	-1.37	6.68	5.16721e-08	1.21686e-06	6	7.37	6.05	5.95	7.31	7.43
ENSMUSG00000054793.8	Cadm4	CADM4	-1.63	3.74	5.75205e-08	1.24716e-06	2.92	4.55	2.89	2.95	4.52	4.59
ENSMUSG00000030774.13	Pak1	PAK1	-1.52	4.7	5.44876e-08	1.2255e-06	3.93	5.46	3.85	4.02	5.5	5.42
ENSMUSG00000008730.17	Hipk1	HIPK1	-1.24	6.01	5.20317e-08	1.22308e-06	5.38	6.63	5.4	5.37	6.66	6.6
ENSMUSG00000021745.14	Ptprg	PTPRG	-1.27	5.17	5.33595e-08	1.2255e-06	4.53	5.8	4.53	4.53	5.8	5.8
ENSMUSG00000057836.12	Xlr3a	XLR3A	1.78	4.53	5.4576e-08	1.2255e-06	5.42	3.64	5.55	5.29	3.62	3.66
ENSMUSG00000023919.7	Cenpq	CENPQ	1.39	4.77	5.35128e-08	1.2255e-06	5.47	4.08	5.53	5.41	4.1	4.06
ENSMUSG00000032997.16	Chpf	CHPF	-1.25	5.47	5.28887e-08	1.2255e-06	4.84	6.1	4.85	4.84	6.08	6.11
ENSMUSG00000035184.15	Fam124a	FAM124A	-1.89	3.21	5.9611e-08	1.25462e-06	2.27	4.16	2.18	2.35	4.13	4.19
ENSMUSG00000066306.13	Numa1	NUMA1	-1.42	7.3	5.33825e-08	1.2255e-06	6.58	8.01	6.66	6.5	8.01	8.01
ENSMUSG00000018171.9	Vmp1	VMP1	1.84	7.95	5.42266e-08	1.2255e-06	8.87	7.03	9.04	8.7	7.02	7.04
ENSMUSG00000007888.15	Crlf1	CRLF1	-1.41	6.26	5.27884e-08	1.2255e-06	5.55	6.96	5.49	5.62	6.91	7.02
ENSMUSG00000029276.13	Glmn	GLMN	1.38	5.19	5.29173e-08	1.2255e-06	5.88	4.49	5.92	5.83	4.43	4.56
ENSMUSG00000020611.14	Gna13	GNA13	-1.25	6.23	5.27331e-08	1.2255e-06	5.61	6.86	5.57	5.65	6.87	6.85
ENSMUSG00000036513.15	Commd2	COMMD2	1.96	5.85	5.27051e-08	1.2255e-06	6.82	4.87	7.01	6.64	4.85	4.89
ENSMUSG00000014313.15	Cox6c	COX6C	1.56	7.59	5.38459e-08	1.2255e-06	8.38	6.81	8.49	8.26	6.78	6.84
ENSMUSG00000024077.15	Strn	STRN	-1.31	5.13	5.44236e-08	1.2255e-06	4.48	5.78	4.46	4.49	5.81	5.75
ENSMUSG00000078974.10	Sec61g	SEC61G	1.92	7.05	5.34478e-08	1.2255e-06	8.01	6.09	8.19	7.83	6.05	6.14
ENSMUSG00000002580.7	Mien1	MIEN1	1.4	4.69	5.48178e-08	1.22655e-06	5.38	3.99	5.45	5.32	3.97	4.01
ENSMUSG00000026211.17	Obsl1	OBSL1	-1.33	6.22	5.36087e-08	1.2255e-06	5.55	6.88	5.6	5.5	6.84	6.93
ENSMUSG00000030613.13	Ccdc90b	CCDC90B	1.45	5.09	5.41875e-08	1.2255e-06	5.82	4.37	5.91	5.73	4.37	4.37
ENSMUSG00000029550.11	Sppl3	SPPL3	-1.24	6.08	5.37879e-08	1.2255e-06	5.46	6.7	5.42	5.49	6.71	6.69
ENSMUSG00000032625.14	Thsd7a	THSD7A	-1.73	6.17	5.42136e-08	1.2255e-06	5.3	7.03	5.41	5.19	6.93	7.13
ENSMUSG00000032060.10	Cryab	CRYAB	-1.77	3.54	6.06908e-08	1.25674e-06	2.66	4.42	2.57	2.74	4.39	4.45
ENSMUSG00000044986.10	Tst	TST	1.3	4.63	5.56902e-08	1.2273e-06	5.28	3.99	5.26	5.3	3.98	3.98
ENSMUSG00000015013.9	Trappc2l	TRAPPC2L	1.49	4.8	5.5348e-08	1.2273e-06	5.54	4.05	5.61	5.47	3.99	4.12
ENSMUSG00000091405.2	Hist2h4	HIST2H4	1.96	7.31	5.4971e-08	1.22655e-06	8.29	6.32	8.48	8.09	6.3	6.35
ENSMUSG00000024548.11	Setbp1	SETBP1	-1.85	4.61	5.81444e-08	1.24716e-06	3.68	5.54	3.83	3.53	5.47	5.6
ENSMUSG00000021411.16	Pxdc1	PXDC1	-1.46	4.48	5.80378e-08	1.24716e-06	3.75	5.21	3.7	3.8	5.25	5.18
ENSMUSG00000041720.14	Pi4ka	PI4KA	-1.34	5.05	5.61836e-08	1.23385e-06	4.38	5.72	4.33	4.42	5.75	5.69
ENSMUSG00000035215.9	Lsm7	LSM7	1.86	6.27	5.42115e-08	1.2255e-06	7.21	5.35	7.38	7.03	5.36	5.33
ENSMUSG00000069117.4	Gm10260	GM10260	1.78	6.57	5.45761e-08	1.2255e-06	7.46	5.68	7.62	7.29	5.65	5.71
ENSMUSG00000040274.11	Cdk6	CDK6	-1.49	7.31	5.5688e-08	1.2273e-06	6.56	8.05	6.66	6.47	8.06	8.04
ENSMUSG00000005533.10	Igf1r	IGF1R	-1.67	6.4	5.51473e-08	1.22655e-06	5.56	7.24	5.7	5.43	7.23	7.24
ENSMUSG00000041702.7	Btbd7	BTBD7	-1.27	6.47	5.50327e-08	1.22655e-06	5.84	7.11	5.79	5.88	7.11	7.1
ENSMUSG00000001999.15	Blvra	BLVRA	1.39	5.15	5.56988e-08	1.2273e-06	5.84	4.46	5.92	5.77	4.43	4.48
ENSMUSG00000025027.18	Xpnpep1	XPNPEP1	-1.54	6.7	5.56903e-08	1.2273e-06	5.93	7.47	5.82	6.04	7.44	7.5
ENSMUSG00000000555.8	Itga5	ITGA5	-1.44	6.13	5.57557e-08	1.2273e-06	5.42	6.86	5.51	5.32	6.87	6.84
ENSMUSG00000027312.14	Atrn	ATRN	-1.68	6.54	5.62459e-08	1.23385e-06	5.7	7.38	5.84	5.56	7.41	7.35
ENSMUSG00000042670.5	Immp1l	IMMP1L	1.96	5.06	5.70911e-08	1.24716e-06	6.04	4.08	6.22	5.87	4.05	4.11
ENSMUSG00000048696.11	Mex3d	MEX3D	-1.23	6.62	5.6623e-08	1.24e-06	6.01	7.23	5.98	6.03	7.21	7.25
ENSMUSG00000049882.10	Vcpkmt	VCPKMT	1.78	3.86	6.2229e-08	1.27148e-06	4.76	2.98	4.86	4.65	3.02	2.93
ENSMUSG00000003531.15	Dgcr6	DGCR6	1.31	4.97	5.7904e-08	1.24716e-06	5.62	4.31	5.68	5.57	4.29	4.33
ENSMUSG00000062352.14	Itgb1bp1	ITGB1BP1	1.79	5.18	5.78363e-08	1.24716e-06	6.08	4.29	6.24	5.93	4.3	4.28
ENSMUSG00000032777.9	Gtf3c1	GTF3C1	-1.23	7.17	5.80644e-08	1.24716e-06	6.55	7.78	6.57	6.54	7.77	7.79
ENSMUSG00000042712.10	Tceal9	TCEAL9	1.32	7.86	5.90553e-08	1.25462e-06	8.52	7.2	8.56	8.48	7.17	7.23
ENSMUSG00000026526.14	Fh1	FH1	1.25	7.24	5.81881e-08	1.24716e-06	7.87	6.62	7.87	7.86	6.65	6.58
ENSMUSG00000054843.9	Atrnl1	ATRNL1	-1.26	6.14	5.78859e-08	1.24716e-06	5.5	6.77	5.46	5.55	6.75	6.79
ENSMUSG00000030037.9	Mrpl53	MRPL53	1.89	5.59	5.80325e-08	1.24716e-06	6.54	4.64	6.71	6.36	4.62	4.67
ENSMUSG00000020409.10	Slu7	SLU7	-1.39	5.07	5.99062e-08	1.25462e-06	4.38	5.77	4.3	4.45	5.75	5.78
ENSMUSG00000044217.17	Aqp5	AQP5	2.26	2.19	6.5692e-08	1.28262e-06	3.31	1.07	3.27	3.35	0.96	1.17
ENSMUSG00000013822.7	Elof1	ELOF1	1.66	6.54	5.79658e-08	1.24716e-06	7.38	5.71	7.52	7.23	5.73	5.7
ENSMUSG00000014294.4	Ndufa2	NDUFA2	1.43	6.76	5.82158e-08	1.24716e-06	7.47	6.04	7.56	7.39	6	6.09
ENSMUSG00000059263.9	Usp47	USP47	-1.34	7.46	5.94857e-08	1.25462e-06	6.79	8.12	6.73	6.84	8.15	8.1
ENSMUSG00000025915.14	Sgk3	SGK3	1.35	4.41	6.1231e-08	1.26317e-06	5.08	3.74	5.1	5.07	3.7	3.78
ENSMUSG00000004099.16	Dnmt1	DNMT1	-1.38	7.5	5.96811e-08	1.25462e-06	6.8	8.19	6.87	6.74	8.22	8.16
ENSMUSG00000041084.8	Ostc	OSTC	1.48	7.12	5.89272e-08	1.25462e-06	7.86	6.38	7.97	7.75	6.38	6.39
ENSMUSG00000040824.3	Snrpd2	SNRPD2	1.39	7.64	5.99367e-08	1.25462e-06	8.34	6.95	8.42	8.26	6.95	6.94
ENSMUSG00000021366.8	Hivep1	HIVEP1	-1.8	4.44	6.34403e-08	1.27857e-06	3.54	5.34	3.71	3.38	5.33	5.35
ENSMUSG00000038025.8	Phf2	PHF2	-1.48	4.94	6.14563e-08	1.26375e-06	4.2	5.67	4.3	4.1	5.68	5.67
ENSMUSG00000078713.8	Tomm5	TOMM5	1.98	7.32	5.98053e-08	1.25462e-06	8.3	6.33	8.5	8.11	6.37	6.29
ENSMUSG00000001016.12	Ilf2	ILF2	1.33	7.69	6.0339e-08	1.25488e-06	8.36	7.03	8.4	8.31	7.06	6.99
ENSMUSG00000028636.14	Ppcs	PPCS	1.68	4.1	6.3774e-08	1.27857e-06	4.94	3.26	5.05	4.83	3.25	3.26
ENSMUSG00000035234.18	Abraxas1	ABRAXAS1	1.31	4.96	6.02651e-08	1.25488e-06	5.62	4.3	5.66	5.57	4.28	4.33
ENSMUSG00000052911.9	Lamb2	LAMB2	-1.39	7.16	6.01261e-08	1.25462e-06	6.47	7.86	6.52	6.42	7.79	7.92
ENSMUSG00000026615.14	Eprs	EPRS	-1.5	8.36	6.24112e-08	1.27217e-06	7.62	9.11	7.53	7.7	9.12	9.1
ENSMUSG00000060288.13	Ppih	PPIH	1.71	5.84	5.92948e-08	1.25462e-06	6.7	4.99	6.84	6.55	5.03	4.95
ENSMUSG00000044340.7	Phlpp1	PHLPP1	-1.38	5.16	6.13754e-08	1.26375e-06	4.47	5.84	4.52	4.41	5.89	5.8
ENSMUSG00000049076.11	Acap2	ACAP2	-1.27	6.09	5.99529e-08	1.25462e-06	5.46	6.72	5.41	5.51	6.72	6.73
ENSMUSG00000025366.8	Esyt1	ESYT1	-1.35	5.52	6.07551e-08	1.25674e-06	4.84	6.19	4.76	4.91	6.18	6.2
ENSMUSG00000001289.12	Pfdn5	PFDN5	1.98	6.94	6.01311e-08	1.25462e-06	7.93	5.95	8.13	7.73	5.91	5.98
ENSMUSG00000064326.13	Siva1	SIVA1	1.35	6.37	5.93853e-08	1.25462e-06	7.04	5.7	7.11	6.98	5.65	5.75
ENSMUSG00000039318.12	Rab3gap2	RAB3GAP2	-1.2	6.1	6.00551e-08	1.25462e-06	5.5	6.7	5.52	5.49	6.7	6.71
ENSMUSG00000043279.9	Trim56	TRIM56	-1.43	5.68	6.08209e-08	1.25674e-06	4.96	6.38	5.05	4.87	6.36	6.41
ENSMUSG00000021905.14	Dph3	DPH3	1.48	6.25	5.97095e-08	1.25462e-06	7	5.51	7.11	6.88	5.53	5.49
ENSMUSG00000039234.11	Sec24d	SEC24D	-1.62	4.83	6.36765e-08	1.27857e-06	4.02	5.64	3.89	4.15	5.64	5.64
ENSMUSG00000031231.4	Cox7b	COX7B	1.89	8.02	6.29033e-08	1.27857e-06	8.97	7.08	9.15	8.79	7.07	7.09
ENSMUSG00000029918.9	Mrps33	MRPS33	1.46	5.99	6.06239e-08	1.25674e-06	6.72	5.27	6.83	6.62	5.23	5.3
ENSMUSG00000022791.18	Tnk2	TNK2	-1.52	6.51	6.18072e-08	1.26728e-06	5.74	7.27	5.85	5.64	7.3	7.23
ENSMUSG00000038024.17	Dennd4c	DENND4C	-1.19	5.89	6.18256e-08	1.26728e-06	5.29	6.48	5.29	5.28	6.48	6.48
ENSMUSG00000032849.14	Abcc4	ABCC4	-1.22	6.23	6.19902e-08	1.26862e-06	5.62	6.84	5.6	5.63	6.87	6.81
ENSMUSG00000023074.11	Mospd1	MOSPD1	1.29	4.53	6.48947e-08	1.28262e-06	5.18	3.88	5.15	5.2	3.88	3.88
ENSMUSG00000015846.14	Rxra	RXRA	-1.27	5.27	6.37476e-08	1.27857e-06	4.63	5.91	4.62	4.65	5.94	5.87
ENSMUSG00000021375.11	Kif13a	KIF13A	-1.5	4.88	6.52836e-08	1.28262e-06	4.13	5.62	4.2	4.06	5.56	5.69
ENSMUSG00000022751.9	Nit2	NIT2	1.67	5.54	6.24615e-08	1.27217e-06	6.38	4.71	6.52	6.23	4.72	4.69
ENSMUSG00000058325.6	Dock1	DOCK1	-1.23	5.89	6.30897e-08	1.27857e-06	5.27	6.51	5.3	5.24	6.48	6.53
ENSMUSG00000028920.9	Fbxo42	FBXO42	-1.32	5.01	6.50056e-08	1.28262e-06	4.35	5.67	4.39	4.31	5.7	5.64
ENSMUSG00000008575.17	Nfib	NFIB	-1.36	6.48	6.32102e-08	1.27857e-06	5.8	7.16	5.88	5.72	7.18	7.14
ENSMUSG00000040725.13	Hnrnpul1	HNRNPUL1	-1.22	6.92	6.36225e-08	1.27857e-06	6.31	7.53	6.34	6.28	7.54	7.52
ENSMUSG00000090553.8	Snrpe	SNRPE	1.76	7.58	6.46191e-08	1.28262e-06	8.46	6.7	8.61	8.3	6.67	6.73
ENSMUSG00000047409.13	Ctdspl	CTDSPL	-1.39	4.44	6.78863e-08	1.29999e-06	3.74	5.13	3.76	3.72	5.1	5.16
ENSMUSG00000038717.8	Atp5l	ATP5L	1.6	7.85	6.54126e-08	1.28262e-06	8.65	7.04	8.78	8.52	7.04	7.05
ENSMUSG00000027276.7	Jag1	JAG1	-1.46	5.46	6.49029e-08	1.28262e-06	4.73	6.2	4.76	4.7	6.29	6.1
ENSMUSG00000042569.13	Dhrs7b	DHRS7B	1.23	5.33	6.36429e-08	1.27857e-06	5.95	4.71	5.98	5.91	4.73	4.69
ENSMUSG00000068749.9	Psma5	PSMA5	1.67	8.04	6.59099e-08	1.28324e-06	8.87	7.21	9.01	8.73	7.22	7.19
ENSMUSG00000053453.9	Thoc7	THOC7	1.35	6.69	6.37579e-08	1.27857e-06	7.37	6.02	7.45	7.29	6	6.04
ENSMUSG00000051483.9	Cbr1	CBR1	2.06	2.38	7.40917e-08	1.35405e-06	3.41	1.36	3.47	3.35	1.32	1.38
ENSMUSG00000032067.6	Pts	PTS	2.05	4.13	6.98552e-08	1.3258e-06	5.16	3.11	5.32	4.99	3.15	3.06
ENSMUSG00000017774.19	Myo1c	MYO1C	-1.27	7.34	6.56732e-08	1.28262e-06	6.71	7.98	6.74	6.68	8.02	7.94
ENSMUSG00000036580.15	Spg20	SPG20	-1.21	5.57	6.52725e-08	1.28262e-06	4.97	6.18	4.96	4.99	6.19	6.17
ENSMUSG00000031198.4	Fundc2	FUNDC2	1.47	6.44	6.43074e-08	1.28262e-06	7.17	5.7	7.25	7.09	5.62	5.78
ENSMUSG00000038366.15	Lasp1	LASP1	-1.27	7.12	6.55066e-08	1.28262e-06	6.48	7.76	6.47	6.5	7.81	7.71
ENSMUSG00000016833.14	Mrps18c	MRPS18C	1.52	5.56	6.46118e-08	1.28262e-06	6.33	4.8	6.44	6.2	4.82	4.79
ENSMUSG00000020536.12	Llgl1	LLGL1	-1.2	6.63	6.50162e-08	1.28262e-06	6.03	7.23	6	6.05	7.21	7.25
ENSMUSG00000020964.14	Sel1l	SEL1L	-1.29	6.01	6.52409e-08	1.28262e-06	5.36	6.65	5.3	5.42	6.64	6.67
ENSMUSG00000022370.13	Mrpl13	MRPL13	1.63	6.92	6.539e-08	1.28262e-06	7.74	6.11	7.88	7.6	6.1	6.12
ENSMUSG00000024953.17	Prdx5	PRDX5	1.21	7	6.55456e-08	1.28262e-06	7.61	6.4	7.62	7.6	6.37	6.43
ENSMUSG00000025812.17	Pard3	PARD3	-1.21	5.73	6.57768e-08	1.28262e-06	5.13	6.33	5.11	5.14	6.31	6.35
ENSMUSG00000024181.9	Mrpl28	MRPL28	1.74	7.2	6.60748e-08	1.2845e-06	8.07	6.33	8.22	7.91	6.28	6.37
ENSMUSG00000040964.16	Arhgef10l	ARHGEF10L	-1.22	5.77	6.64302e-08	1.28945e-06	5.17	6.38	5.16	5.17	6.35	6.41
ENSMUSG00000034285.15	Nipsnap1	NIPSNAP1	1.41	4	7.18786e-08	1.34503e-06	4.7	3.3	4.67	4.73	3.31	3.27
ENSMUSG00000026842.16	Abl1	ABL1	-1.19	6.79	6.65745e-08	1.2903e-06	6.2	7.38	6.2	6.19	7.39	7.37
ENSMUSG00000031546.6	Gins4	GINS4	1.36	5.82	6.57779e-08	1.28262e-06	6.5	5.14	6.59	6.41	5.15	5.12
ENSMUSG00000020978.10	Klhdc2	KLHDC2	1.37	7.57	6.77613e-08	1.29999e-06	8.26	6.88	8.34	8.18	6.87	6.9
ENSMUSG00000026933.17	Camsap1	CAMSAP1	-1.19	6.08	6.67007e-08	1.29079e-06	5.48	6.68	5.5	5.47	6.7	6.66
ENSMUSG00000109771.1	Gm35315	GM35315	1.45	3.85	7.31625e-08	1.3525e-06	4.58	3.13	4.62	4.54	3.12	3.14
ENSMUSG00000004846.10	Plod3	PLOD3	-1.21	6.39	6.69152e-08	1.29299e-06	5.79	7	5.76	5.82	6.98	7.01
ENSMUSG00000092074.2	Dynlt1a	DYNLT1A	1.87	4.15	7.23926e-08	1.34604e-06	5.1	3.21	5.24	4.95	3.22	3.21
ENSMUSG00000026604.17	Ptpn14	PTPN14	-1.56	6.76	6.76595e-08	1.29999e-06	5.98	7.54	6.1	5.86	7.54	7.54
ENSMUSG00000050608.11	Micos10	MICOS10	1.69	6.48	6.70367e-08	1.29338e-06	7.33	5.63	7.46	7.19	5.56	5.71
ENSMUSG00000068134.13	Zfp120	ZFP120	1.34	5.03	6.87087e-08	1.31181e-06	5.7	4.36	5.77	5.63	4.34	4.37
ENSMUSG00000060261.15	Gtf2i	GTF2I	-1.24	7.27	6.94361e-08	1.3198e-06	6.65	7.88	6.65	6.65	7.85	7.92
ENSMUSG00000015806.12	Qdpr	QDPR	1.17	6.39	6.7842e-08	1.29999e-06	6.97	5.8	6.96	6.99	5.77	5.82
ENSMUSG00000042063.11	Zfp386	ZFP386	1.33	6.12	6.77457e-08	1.29999e-06	6.79	5.46	6.87	6.7	5.47	5.44
ENSMUSG00000016252.7	Atp5e	ATP5E	2.06	7.09	6.90872e-08	1.31708e-06	8.12	6.06	8.34	7.9	6.02	6.1
ENSMUSG00000026281.15	Dtymk	DTYMK	1.61	6.66	6.83891e-08	1.30766e-06	7.46	5.86	7.61	7.32	5.85	5.87
ENSMUSG00000030960.16	Eef1akmt2	EEF1AKMT2	1.46	4.46	7.20235e-08	1.34503e-06	5.2	3.74	5.22	5.17	3.64	3.82
ENSMUSG00000054428.12	Atpif1	ATPIF1	1.55	7.89	7.08869e-08	1.33746e-06	8.66	7.12	8.78	8.55	7.08	7.16
ENSMUSG00000038909.16	Kat7	KAT7	-1.21	5.95	6.92211e-08	1.31767e-06	5.34	6.55	5.33	5.35	6.58	6.52
ENSMUSG00000015501.10	Hivep2	HIVEP2	-1.39	4.49	7.40333e-08	1.35405e-06	3.8	5.19	3.85	3.75	5.16	5.21
ENSMUSG00000062456.4	Rpl9-ps6	RPL9-PS6	1.93	8.77	7.34491e-08	1.35405e-06	9.73	7.8	9.92	9.54	7.78	7.82
ENSMUSG00000027247.16	Arhgap1	ARHGAP1	-1.5	5.87	7.03908e-08	1.33005e-06	5.12	6.62	5	5.23	6.64	6.59
ENSMUSG00000014226.10	Cacybp	CACYBP	1.42	7.98	7.21423e-08	1.34529e-06	8.7	7.27	8.77	8.62	7.32	7.22
ENSMUSG00000039016.5	Timm8b	TIMM8B	1.94	6.5	7.01702e-08	1.32949e-06	7.47	5.53	7.67	7.27	5.5	5.56
ENSMUSG00000027952.16	Pmvk	PMVK	1.32	4.24	7.49324e-08	1.35563e-06	4.9	3.58	4.89	4.9	3.58	3.58
ENSMUSG00000040690.15	Col16a1	COL16A1	-1.5	5.21	7.26146e-08	1.34626e-06	4.46	5.96	4.49	4.42	5.86	6.05
ENSMUSG00000022890.13	Atp5j	ATP5J	1.34	7.32	7.15495e-08	1.34402e-06	8	6.65	8.07	7.92	6.63	6.68
ENSMUSG00000022377.16	Asap1	ASAP1	-1.4	5.89	7.13736e-08	1.34402e-06	5.2	6.59	5.26	5.13	6.66	6.52
ENSMUSG00000032459.9	Mrps22	MRPS22	1.37	5.92	7.02574e-08	1.32949e-06	6.61	5.23	6.7	6.52	5.27	5.2
ENSMUSG00000035107.13	Dcbld2	DCBLD2	-1.3	6.94	7.15169e-08	1.34402e-06	6.29	7.58	6.23	6.35	7.62	7.55
ENSMUSG00000087687.3	Pet100	PET100	1.94	4.71	7.39634e-08	1.35405e-06	5.68	3.75	5.85	5.51	3.71	3.78
ENSMUSG00000091228.1	Gm20390	GM20390	1.3	7.31	7.19213e-08	1.34503e-06	7.96	6.66	8.03	7.9	6.66	6.67
ENSMUSG00000037072.15	Selenof	SELENOF	1.52	8.66	7.53004e-08	1.35563e-06	9.41	7.9	9.52	9.31	7.89	7.91
ENSMUSG00000032826.18	Ank2	ANK2	-1.4	4.8	7.50039e-08	1.35563e-06	4.11	5.5	4.18	4.03	5.48	5.52
ENSMUSG00000028998.6	Tomm7	TOMM7	1.55	6.96	7.18493e-08	1.34503e-06	7.74	6.19	7.86	7.61	6.15	6.22
ENSMUSG00000032047.5	Acat1	ACAT1	1.23	7.52	7.30952e-08	1.3525e-06	8.13	6.9	8.11	8.16	6.88	6.93
ENSMUSG00000019947.10	Arid5b	ARID5B	-1.61	6.57	7.25378e-08	1.34626e-06	5.77	7.37	5.89	5.62	7.35	7.39
ENSMUSG00000030513.14	Pcsk6	PCSK6	-1.55	3.79	8.09369e-08	1.39561e-06	3.02	4.56	3.06	2.97	4.59	4.53
ENSMUSG00000031103.12	Elf4	ELF4	-1.63	4.33	7.85167e-08	1.3836e-06	3.52	5.14	3.63	3.4	5.19	5.1
ENSMUSG00000024927.8	Rela	RELA	-1.23	5.13	7.42502e-08	1.35418e-06	4.52	5.74	4.53	4.5	5.74	5.74
ENSMUSG00000030612.6	Mrpl46	MRPL46	1.55	5.06	7.37999e-08	1.35405e-06	5.84	4.29	5.95	5.72	4.27	4.31
ENSMUSG00000072582.9	Ptrh2	PTRH2	1.28	6.49	7.23721e-08	1.34604e-06	7.13	5.85	7.21	7.06	5.85	5.85
ENSMUSG00000042644.9	Itpr3	ITPR3	-1.4	7.18	7.39661e-08	1.35405e-06	6.47	7.88	6.56	6.39	7.85	7.9
ENSMUSG00000029461.17	Fam168a	FAM168A	-1.33	5.21	7.49527e-08	1.35563e-06	4.55	5.88	4.48	4.62	5.89	5.86
ENSMUSG00000045667.14	Smtnl2	SMTNL2	-2.24	4.27	8.10501e-08	1.39561e-06	3.15	5.39	2.93	3.37	5.3	5.48
ENSMUSG00000014232.14	Cluap1	CLUAP1	1.37	3.98	8.0076e-08	1.39153e-06	4.66	3.3	4.65	4.68	3.3	3.29
ENSMUSG00000006445.3	Epha2	EPHA2	-1.45	7.29	7.52033e-08	1.35563e-06	6.56	8.02	6.66	6.47	8.06	7.98
ENSMUSG00000024099.15	Ndufv2	NDUFV2	1.55	7.09	7.4443e-08	1.35418e-06	7.86	6.32	7.99	7.73	6.34	6.3
ENSMUSG00000031642.9	Sh3rf1	SH3RF1	-1.3	4.81	7.75243e-08	1.37201e-06	4.17	5.46	4.13	4.2	5.49	5.44
ENSMUSG00000014980.14	Tsen15	TSEN15	1.47	5.01	7.53423e-08	1.35563e-06	5.75	4.28	5.85	5.65	4.31	4.24
ENSMUSG00000051339.10	2900026A02Rik	2900026A02RIK	-1.35	6.64	7.45217e-08	1.35418e-06	5.97	7.31	6.05	5.88	7.32	7.31
ENSMUSG00000038510.12	Rpf2	RPF2	1.38	6.4	7.38409e-08	1.35405e-06	7.09	5.71	7.18	7	5.75	5.68
ENSMUSG00000028455.15	Stoml2	STOML2	1.33	7.21	7.52741e-08	1.35563e-06	7.87	6.54	7.94	7.8	6.5	6.58
ENSMUSG00000028576.12	Ift74	IFT74	1.14	5.78	7.37077e-08	1.35405e-06	6.35	5.21	6.35	6.35	5.19	5.22
ENSMUSG00000074364.6	Ehd2	EHD2	-1.31	5.59	7.57581e-08	1.35739e-06	4.94	6.25	4.87	5	6.28	6.21
ENSMUSG00000027282.17	Mtch2	MTCH2	1.42	7.66	7.66741e-08	1.36616e-06	8.37	6.95	8.47	8.27	6.93	6.97
ENSMUSG00000032330.7	Cox7a2	COX7A2	1.55	7.79	7.7095e-08	1.37176e-06	8.56	7.02	8.69	8.44	7	7.04
ENSMUSG00000010358.13	Ifi35	IFI35	1.51	3.48	8.47202e-08	1.42147e-06	4.24	2.73	4.22	4.26	2.71	2.75
ENSMUSG00000039221.10	Rpl22l1	RPL22L1	1.9	8.34	7.88083e-08	1.38448e-06	9.29	7.38	9.48	9.1	7.36	7.41
ENSMUSG00000033845.13	Mrpl15	MRPL15	1.42	6.92	7.55263e-08	1.35704e-06	7.63	6.21	7.73	7.53	6.17	6.25
ENSMUSG00000060073.9	Psma3	PSMA3	1.66	8.53	7.94936e-08	1.38983e-06	9.36	7.7	9.49	9.22	7.72	7.68
ENSMUSG00000024592.15	C330018D20Rik	C330018D20RIK	1.65	4.38	8.02513e-08	1.39153e-06	5.21	3.56	5.31	5.1	3.49	3.62
ENSMUSG00000047613.10	A430005L14Rik	A430005L14RIK	1.55	5.37	7.61043e-08	1.36169e-06	6.14	4.59	6.26	6.02	4.55	4.63
ENSMUSG00000028402.18	Mpdz	MPDZ	-1.51	5.5	7.75376e-08	1.37201e-06	4.75	6.25	4.86	4.63	6.29	6.21
ENSMUSG00000036180.15	Gatad2a	GATAD2A	-1.18	6.86	7.64731e-08	1.36448e-06	6.28	7.45	6.28	6.26	7.47	7.43
ENSMUSG00000047888.10	Tnrc6b	TNRC6B	-1.5	5.65	7.73351e-08	1.37201e-06	4.9	6.4	5.02	4.79	6.37	6.43
ENSMUSG00000027797.15	Dclk1	DCLK1	-1.73	4.49	8.23402e-08	1.40798e-06	3.63	5.36	3.53	3.72	5.26	5.45
ENSMUSG00000035351.16	Nup37	NUP37	1.32	5.73	7.56603e-08	1.35739e-06	6.39	5.08	6.48	6.31	5.08	5.07
ENSMUSG00000042312.9	S100a13	S100A13	1.68	4.08	8.27578e-08	1.40798e-06	4.92	3.25	4.91	4.93	3.1	3.38
ENSMUSG00000041530.16	Ago1	AGO1	-1.22	5.42	7.7703e-08	1.37304e-06	4.81	6.03	4.79	4.84	6.01	6.05
ENSMUSG00000021606.8	Ndufs6	NDUFS6	1.71	6.25	7.62409e-08	1.36223e-06	7.11	5.38	7.27	6.94	5.4	5.37
ENSMUSG00000024608.11	Rps14	RPS14	1.83	10.76	8.59882e-08	1.42671e-06	11.67	9.84	11.82	11.52	9.84	9.85
ENSMUSG00000033392.16	Clasp2	CLASP2	-1.21	5.44	7.80617e-08	1.37748e-06	4.84	6.05	4.87	4.81	6.06	6.04
ENSMUSG00000032290.7	Ptpn9	PTPN9	-1.23	5.25	7.86913e-08	1.38448e-06	4.63	5.87	4.61	4.66	5.89	5.84
ENSMUSG00000026333.14	Gin1	GIN1	1.53	3.47	8.76489e-08	1.43059e-06	4.24	2.71	4.25	4.23	2.76	2.66
ENSMUSG00000024902.5	Mrpl11	MRPL11	1.41	5.85	7.7283e-08	1.37201e-06	6.56	5.14	6.66	6.45	5.11	5.18
ENSMUSG00000007836.6	Hnrnpa0	HNRNPA0	-1.32	7.68	8.02702e-08	1.39153e-06	7.02	8.34	6.98	7.06	8.29	8.4
ENSMUSG00000077450.13	Rab11b	RAB11B	-1.21	5.61	7.88907e-08	1.38448e-06	5	6.21	4.96	5.04	6.22	6.21
ENSMUSG00000029401.8	Rilpl2	RILPL2	1.2	4.92	7.97462e-08	1.39045e-06	5.52	4.31	5.53	5.5	4.31	4.32
ENSMUSG00000096010.2	Hist4h4	HIST4H4	2.02	7.93	8.16762e-08	1.40074e-06	8.94	6.93	9.15	8.72	6.95	6.9
ENSMUSG00000030232.18	Aebp2	AEBP2	-1.17	6.69	7.92284e-08	1.3885e-06	6.11	7.28	6.12	6.09	7.26	7.3
ENSMUSG00000030536.10	Iqgap1	IQGAP1	-1.51	8.46	8.35049e-08	1.41506e-06	7.7	9.21	7.6	7.8	9.19	9.23
ENSMUSG00000021024.14	Psma6	PSMA6	1.63	8.06	8.27275e-08	1.40798e-06	8.88	7.25	9.02	8.74	7.26	7.24
ENSMUSG00000004098.7	Col5a3	COL5A3	-3.27	2.51	9.12097e-08	1.43886e-06	0.9	4.14	1.24	0.52	4.06	4.23
ENSMUSG00000062116.10	Zfp954	ZFP954	1.31	4.18	8.54951e-08	1.42244e-06	4.84	3.53	4.86	4.82	3.53	3.53
ENSMUSG00000041025.15	Iffo2	IFFO2	-1.31	5.6	8.09156e-08	1.39561e-06	4.94	6.25	4.95	4.93	6.33	6.18
ENSMUSG00000026034.17	Clk1	CLK1	1.61	6.49	7.95211e-08	1.38983e-06	7.3	5.69	7.45	7.15	5.69	5.68
ENSMUSG00000090258.7	Churc1	CHURC1	1.75	5.33	8.05213e-08	1.394e-06	6.2	4.46	6.36	6.04	4.43	4.49
ENSMUSG00000068923.14	Syt11	SYT11	-1.48	4.42	8.63816e-08	1.42688e-06	3.69	5.16	3.61	3.76	5.21	5.11
ENSMUSG00000031950.7	Gabarapl2	GABARAPL2	1.53	6.46	7.97735e-08	1.39045e-06	7.23	5.7	7.36	7.09	5.67	5.72
ENSMUSG00000063011.7	Msln	MSLN	1.32	5.87	8.0258e-08	1.39153e-06	6.53	5.21	6.54	6.52	5.12	5.3
ENSMUSG00000090266.10	Mettl23	METTL23	1.56	5.18	8.19039e-08	1.40277e-06	5.96	4.4	6.09	5.83	4.41	4.39
ENSMUSG00000029910.14	Mad2l1	MAD2L1	1.54	6.79	8.12146e-08	1.39656e-06	7.56	6.02	7.69	7.43	6.05	5.98
ENSMUSG00000060904.14	Arl1	ARL1	1.32	7.68	8.34525e-08	1.41506e-06	8.34	7.02	8.41	8.27	7	7.04
ENSMUSG00000029174.18	Tbc1d1	TBC1D1	-1.17	6.54	8.16735e-08	1.40074e-06	5.96	7.12	5.93	5.98	7.14	7.11
ENSMUSG00000040658.7	Dnph1	DNPH1	1.24	4.71	8.43889e-08	1.42132e-06	5.33	4.1	5.36	5.3	4.11	4.08
ENSMUSG00000049313.8	Sorl1	SORL1	-1.29	5.21	8.39707e-08	1.42107e-06	4.57	5.86	4.55	4.59	5.8	5.91
ENSMUSG00000042682.9	Selenok	SELENOK	1.42	6.14	8.10401e-08	1.39561e-06	6.85	5.43	6.95	6.74	5.4	5.46
ENSMUSG00000038690.15	Atp5j2	ATP5J2	1.57	8.12	8.5104e-08	1.42147e-06	8.9	7.34	9.03	8.78	7.31	7.37
ENSMUSG00000020898.18	Ctc1	CTC1	-1.16	5.75	8.26093e-08	1.40798e-06	5.17	6.32	5.16	5.17	6.31	6.34
ENSMUSG00000028691.12	Prdx1	PRDX1	1.46	9.44	8.92485e-08	1.43608e-06	10.17	8.7	10.25	10.09	8.73	8.68
ENSMUSG00000030498.15	Gas2	GAS2	1.26	4.91	8.44292e-08	1.42132e-06	5.54	4.28	5.58	5.49	4.25	4.31
ENSMUSG00000046909.9	Tefm	TEFM	1.76	4.64	8.6562e-08	1.42721e-06	5.52	3.76	5.67	5.37	3.77	3.75
ENSMUSG00000030706.17	Mrpl48	MRPL48	1.38	5.42	8.31036e-08	1.41199e-06	6.11	4.73	6.21	6.01	4.73	4.73
ENSMUSG00000001435.15	Col18a1	COL18A1	-1.68	7.37	8.50999e-08	1.42147e-06	6.53	8.21	6.39	6.67	8.18	8.25
ENSMUSG00000066880.15	Zfp617	ZFP617	1.22	5.72	8.24605e-08	1.40798e-06	6.34	5.12	6.38	6.29	5.15	5.07
ENSMUSG00000001507.16	Itga3	ITGA3	-1.32	7.98	8.67452e-08	1.4284e-06	7.32	8.64	7.3	7.34	8.7	8.58
ENSMUSG00000091537.2	Tma7	TMA7	1.66	6.92	8.43877e-08	1.42132e-06	7.75	6.1	7.91	7.6	6.12	6.08
ENSMUSG00000034424.5	Gcsh	GCSH	1.29	6.74	8.42903e-08	1.42132e-06	7.38	6.1	7.45	7.31	6.14	6.06
ENSMUSG00000010277.7	2610507B11Rik	2610507B11RIK	-1.22	7.75	8.71712e-08	1.43041e-06	7.14	8.36	7.11	7.17	8.37	8.35
ENSMUSG00000054519.8	Zfp867	ZFP867	1.65	4.52	8.88823e-08	1.43608e-06	5.34	3.7	5.47	5.22	3.68	3.72
ENSMUSG00000038845.11	Phb	PHB	1.33	8.1	8.77908e-08	1.43059e-06	8.77	7.43	8.83	8.7	7.45	7.41
ENSMUSG00000093674.7	Rpl41	RPL41	1.99	10.98	9.55607e-08	1.4732e-06	11.98	9.98	12.16	11.8	9.94	10.03
ENSMUSG00000059839.9	Zfp874b	ZFP874B	1.34	4.12	9.13037e-08	1.43886e-06	4.79	3.45	4.78	4.79	3.4	3.49
ENSMUSG00000026360.9	Rgs2	RGS2	1.35	4.24	9.06849e-08	1.43608e-06	4.92	3.56	4.93	4.9	3.51	3.62
ENSMUSG00000041120.6	Nbl1	NBL1	-2.06	2.39	9.95165e-08	1.50183e-06	1.36	3.42	1.31	1.4	3.4	3.44
ENSMUSG00000050910.5	Cdr2l	CDR2L	-1.18	5.57	8.58867e-08	1.42671e-06	4.97	6.15	4.99	4.96	6.18	6.13
ENSMUSG00000050957.4	Insl6	INSL6	3.21	1.42	8.91194e-08	1.43608e-06	3.03	-0.16	3.18	2.86	-0.14	-0.24
ENSMUSG00000055707.13	Klhl26	KLHL26	-1.21	5.19	8.72026e-08	1.43041e-06	4.58	5.79	4.55	4.61	5.78	5.8
ENSMUSG00000026021.15	Sumo1	SUMO1	1.5	7.82	8.7499e-08	1.43059e-06	8.56	7.07	8.68	8.45	7.03	7.11
ENSMUSG00000041977.18	Arhgef11	ARHGEF11	-1.3	4.74	8.97938e-08	1.43608e-06	4.09	5.38	4.14	4.04	5.39	5.38
ENSMUSG00000053477.17	Tcf4	TCF4	-1.2	6.25	8.54169e-08	1.42244e-06	5.64	6.84	5.62	5.67	6.81	6.88
ENSMUSG00000020526.12	Znhit3	ZNHIT3	2	4.78	8.87955e-08	1.43608e-06	5.78	3.79	5.96	5.6	3.74	3.83
ENSMUSG00000019143.15	Hars2	HARS2	1.13	5.73	8.47909e-08	1.42147e-06	6.3	5.17	6.32	6.28	5.15	5.18
ENSMUSG00000015672.4	Mrpl32	MRPL32	1.4	5.93	8.50015e-08	1.42147e-06	6.63	5.24	6.74	6.52	5.24	5.23
ENSMUSG00000001158.13	Snrnp27	SNRNP27	1.36	5.8	8.5095e-08	1.42147e-06	6.48	5.12	6.58	6.38	5.12	5.12
ENSMUSG00000031987.6	Egln1	EGLN1	-1.94	7.47	8.83234e-08	1.43593e-06	6.5	8.45	6.33	6.67	8.35	8.54
ENSMUSG00000041870.16	Ankrd13a	ANKRD13A	-1.16	6.53	8.64305e-08	1.42688e-06	5.96	7.12	5.95	5.96	7.15	7.09
ENSMUSG00000038733.14	Wdr26	WDR26	-1.19	6.99	8.71247e-08	1.43041e-06	6.39	7.58	6.43	6.36	7.57	7.59
ENSMUSG00000002489.16	Tiam1	TIAM1	-1.43	4.95	9.04416e-08	1.43608e-06	4.23	5.66	4.33	4.13	5.65	5.67
ENSMUSG00000003062.13	Stard3nl	STARD3NL	1.53	6	8.60859e-08	1.42671e-06	6.76	5.23	6.89	6.63	5.21	5.26
ENSMUSG00000036206.12	Sh3bp4	SH3BP4	-1.35	4.57	9.27463e-08	1.44723e-06	3.9	5.24	3.83	3.95	5.27	5.22
ENSMUSG00000024785.7	Rcl1	RCL1	1.13	6.23	8.62523e-08	1.42688e-06	6.8	5.67	6.77	6.82	5.66	5.67
ENSMUSG00000061887.14	Ssbp3	SSBP3	-1.25	6.17	8.78243e-08	1.43059e-06	5.54	6.79	5.48	5.6	6.76	6.82
ENSMUSG00000073435.10	Nme3	NME3	2.08	2.86	1.03074e-07	1.51606e-06	3.91	1.83	4.03	3.78	1.76	1.88
ENSMUSG00000030074.9	Gxylt2	GXYLT2	-1.18	7.32	8.92366e-08	1.43608e-06	6.73	7.91	6.71	6.75	7.9	7.92
ENSMUSG00000078681.10	Tm2d3	TM2D3	1.24	4.74	9.04982e-08	1.43608e-06	5.36	4.12	5.37	5.35	4.08	4.16
ENSMUSG00000025940.6	Tmem70	TMEM70	1.55	7.24	8.89993e-08	1.43608e-06	8.02	6.47	8.15	7.88	6.46	6.48
ENSMUSG00000034875.5	Nudt19	NUDT19	1.41	5.69	8.77161e-08	1.43059e-06	6.39	4.98	6.47	6.31	5.06	4.91
ENSMUSG00000005374.13	Tbl2	TBL2	-1.23	5.92	8.91811e-08	1.43608e-06	5.3	6.54	5.25	5.36	6.52	6.56
ENSMUSG00000032369.13	Plscr1	PLSCR1	1.12	6.27	8.78835e-08	1.43059e-06	6.84	5.71	6.83	6.84	5.73	5.69
ENSMUSG00000022940.17	Pigp	PIGP	1.69	5.19	8.99532e-08	1.43608e-06	6.03	4.34	6.18	5.88	4.33	4.35
ENSMUSG00000021770.11	Samd8	SAMD8	-1.22	4.89	9.26777e-08	1.44723e-06	4.28	5.5	4.28	4.28	5.49	5.51
ENSMUSG00000090015.8	Gm15446	GM15446	1.81	4.2	9.61801e-08	1.47919e-06	5.11	3.3	5.25	4.96	3.34	3.26
ENSMUSG00000054072.12	Iigp1	IIGP1	1.35	5.23	8.96754e-08	1.43608e-06	5.91	4.55	5.9	5.92	4.46	4.65
ENSMUSG00000060206.11	Zfp462	ZFP462	-1.5	5.23	9.23004e-08	1.44555e-06	4.48	5.97	4.6	4.36	6	5.95
ENSMUSG00000045983.16	Eif4g1	EIF4G1	-1.34	9.24	9.66482e-08	1.48113e-06	8.57	9.91	8.57	8.56	9.95	9.87
ENSMUSG00000021981.10	Cab39l	CAB39L	1.13	5.48	8.91343e-08	1.43608e-06	6.04	4.92	6.06	6.03	4.92	4.92
ENSMUSG00000068284.14	Usf3	USF3	-1.69	4.56	9.66122e-08	1.48113e-06	3.72	5.4	3.88	3.56	5.39	5.41
ENSMUSG00000069769.13	Msi2	MSI2	-1.5	6.54	9.0349e-08	1.43608e-06	5.8	7.3	5.68	5.91	7.25	7.34
ENSMUSG00000033237.19	Arid2	ARID2	-1.15	5.83	9.03452e-08	1.43608e-06	5.26	6.4	5.27	5.25	6.42	6.39
ENSMUSG00000038214.15	Bend3	BEND3	-1.43	5.11	9.31768e-08	1.44874e-06	4.39	5.83	4.49	4.3	5.87	5.78
ENSMUSG00000038683.16	Pak1ip1	PAK1IP1	1.25	6.39	8.94115e-08	1.43608e-06	7.02	5.78	7.09	6.95	5.8	5.75
ENSMUSG00000042439.13	Zfp532	ZFP532	-1.32	5.41	9.22681e-08	1.44555e-06	4.75	6.06	4.83	4.67	6.04	6.09
ENSMUSG00000034566.10	Atp5h	ATP5H	1.45	7.47	9.21939e-08	1.44555e-06	8.2	6.75	8.31	8.09	6.71	6.78
ENSMUSG00000074102.4	Rbm15b	RBM15B	-1.15	6.97	9.12703e-08	1.43886e-06	6.39	7.55	6.39	6.4	7.54	7.56
ENSMUSG00000028223.8	Decr1	DECR1	1.26	5.4	9.04166e-08	1.43608e-06	6.03	4.77	6	6.05	4.7	4.84
ENSMUSG00000032452.12	Clstn2	CLSTN2	-3.07	1.6	9.35283e-08	1.45235e-06	0.08	3.15	0.28	-0.14	3.07	3.2
ENSMUSG00000002064.10	Sdf2	SDF2	1.39	5.78	9.00997e-08	1.43608e-06	6.47	5.09	6.58	6.37	5.08	5.09
ENSMUSG00000039414.10	Heatr5b	HEATR5B	-1.37	4.22	9.94342e-08	1.50183e-06	3.54	4.9	3.57	3.5	4.93	4.88
ENSMUSG00000030647.8	Ndufc2	NDUFC2	1.27	6.55	9.061e-08	1.43608e-06	7.19	5.92	7.26	7.11	5.89	5.94
ENSMUSG00000028776.14	Tinagl1	TINAGL1	-1.27	7.02	9.21759e-08	1.44555e-06	6.38	7.66	6.32	6.45	7.64	7.68
ENSMUSG00000029551.13	Psmg3	PSMG3	1.38	5.38	9.13114e-08	1.43886e-06	6.07	4.7	6.16	5.98	4.74	4.64
ENSMUSG00000031328.15	Flna	FLNA	-1.71	10.57	1.02616e-07	1.51311e-06	9.72	11.43	9.61	9.84	11.45	11.41
ENSMUSG00000019373.11	Cops3	COPS3	1.32	7.36	9.30333e-08	1.44874e-06	8.03	6.7	8.11	7.94	6.72	6.69
ENSMUSG00000019857.7	Asf1a	ASF1A	1.16	5.16	9.25428e-08	1.44723e-06	5.75	4.58	5.76	5.73	4.6	4.56
ENSMUSG00000063439.7	B9d2	B9D2	1.66	4.08	1.00696e-07	1.50879e-06	4.91	3.25	5.02	4.8	3.19	3.31
ENSMUSG00000038773.11	Kdm3b	KDM3B	-1.19	5.86	9.31827e-08	1.44874e-06	5.27	6.46	5.29	5.25	6.42	6.49
ENSMUSG00000066607.5	Insyn1	INSYN1	-1.35	5.82	9.37865e-08	1.4546e-06	5.14	6.49	5.18	5.1	6.41	6.57
ENSMUSG00000034192.5	Lsm3	LSM3	1.38	6.35	9.22477e-08	1.44555e-06	7.04	5.66	7.15	6.93	5.65	5.67
ENSMUSG00000016520.7	Lnx2	LNX2	-1.31	4.53	9.93802e-08	1.50183e-06	3.88	5.19	3.84	3.91	5.16	5.21
ENSMUSG00000018449.12	Rpain	RPAIN	2.13	4.37	1.00345e-07	1.50706e-06	5.44	3.31	5.63	5.24	3.28	3.34
ENSMUSG00000020309.6	Chac2	CHAC2	1.46	3.95	1.03054e-07	1.51606e-06	4.68	3.22	4.71	4.65	3.14	3.3
ENSMUSG00000050567.16	Maml1	MAML1	-1.58	4.48	1.01765e-07	1.51208e-06	3.69	5.27	3.82	3.56	5.3	5.24
ENSMUSG00000051154.11	Commd3	COMMD3	1.43	6.87	9.44456e-08	1.45952e-06	7.58	6.15	7.7	7.47	6.13	6.17
ENSMUSG00000020661.15	Dnmt3a	DNMT3A	-1.36	5.4	9.66535e-08	1.48113e-06	4.72	6.08	4.79	4.65	6.02	6.15
ENSMUSG00000051341.6	Zfp52	ZFP52	1.41	5.69	9.40317e-08	1.45664e-06	6.4	4.99	6.51	6.29	4.98	4.99
ENSMUSG00000030259.12	Rassf8	RASSF8	-1.23	5.04	9.81935e-08	1.49401e-06	4.43	5.66	4.39	4.47	5.66	5.66
ENSMUSG00000025487.15	Psmd13	PSMD13	1.27	7.11	9.594e-08	1.47727e-06	7.74	6.47	7.81	7.67	6.48	6.46
ENSMUSG00000063412.4	Gm10131	GM10131	1.15	6.23	9.42822e-08	1.45876e-06	6.81	5.65	6.85	6.77	5.64	5.67
ENSMUSG00000026837.15	Col5a1	COL5A1	-1.98	8.23	1.00544e-07	1.50827e-06	7.23	9.22	7.42	7.05	9.18	9.26
ENSMUSG00000063663.11	Brwd3	BRWD3	-1.39	4.27	1.04406e-07	1.53038e-06	3.58	4.96	3.56	3.59	4.92	5.01
ENSMUSG00000015289.4	Lage3	LAGE3	1.46	4.92	9.7857e-08	1.49244e-06	5.65	4.19	5.76	5.54	4.17	4.2
ENSMUSG00000018398.18	2021-09-08	44447	-1.28	4.71	1.012e-07	1.51208e-06	4.06	5.35	4.02	4.11	5.37	5.33
ENSMUSG00000075486.10	Commd6	COMMD6	1.48	4.68	1.00046e-07	1.50515e-06	5.42	3.94	5.53	5.31	3.95	3.92
ENSMUSG00000021760.5	Gpx8	GPX8	1.33	5.22	9.69312e-08	1.48192e-06	5.88	4.55	5.97	5.79	4.56	4.54
ENSMUSG00000000058.6	Cav2	CAV2	1.25	6.15	9.54505e-08	1.4732e-06	6.77	5.52	6.84	6.69	5.5	5.54
ENSMUSG00000026914.15	Psmd14	PSMD14	1.46	8.03	1.00101e-07	1.50515e-06	8.76	7.3	8.87	8.65	7.33	7.28
ENSMUSG00000040560.10	Wdr7	WDR7	-1.22	4.79	1.01805e-07	1.51208e-06	4.18	5.4	4.18	4.17	5.39	5.41
ENSMUSG00000079316.10	Rab9	RAB9	1.48	5.75	9.70515e-08	1.48192e-06	6.5	5.01	6.62	6.37	5.05	4.97
ENSMUSG00000031922.12	Cep57	CEP57	1.2	6.29	9.70133e-08	1.48192e-06	6.89	5.7	6.95	6.83	5.71	5.68
ENSMUSG00000033004.15	Mycbp2	MYCBP2	-1.52	5.72	9.95282e-08	1.50183e-06	4.96	6.48	5.09	4.82	6.5	6.46
ENSMUSG00000003623.4	Crot	CROT	1.15	7.23	9.91377e-08	1.50183e-06	7.8	6.66	7.81	7.79	6.65	6.66
ENSMUSG00000021133.9	Susd6	SUSD6	-1.3	5.85	9.91106e-08	1.50183e-06	5.2	6.5	5.11	5.28	6.5	6.5
ENSMUSG00000051323.16	Pcdh19	PCDH19	-1.39	4.35	1.06973e-07	1.54675e-06	3.66	5.04	3.7	3.59	5.08	5
ENSMUSG00000031604.10	Msmo1	MSMO1	1.81	6.38	9.81696e-08	1.49401e-06	7.29	5.48	7.33	7.25	5.66	5.29
ENSMUSG00000043613.8	Mmp3	MMP3	4.15	0.55	7.44219e-08	1.35418e-06	2.63	-1.46	2.79	2.46	-1.56	-1.5
ENSMUSG00000048915.12	Efna5	EFNA5	-1.59	3.34	1.15169e-07	1.59316e-06	2.54	4.13	2.57	2.51	4.15	4.11
ENSMUSG00000026511.7	Srp9	SRP9	1.3	6.66	9.84873e-08	1.4967e-06	7.32	6.02	7.4	7.23	6.04	5.99
ENSMUSG00000057278.8	Snrpg	SNRPG	1.84	7.47	1.00822e-07	1.50892e-06	8.38	6.54	8.58	8.19	6.55	6.54
ENSMUSG00000022544.14	Eef2kmt	EEF2KMT	1.44	4.2	1.06637e-07	1.54584e-06	4.92	3.48	4.98	4.86	3.42	3.54
ENSMUSG00000022428.8	Cby1	CBY1	1.4	4.05	1.08228e-07	1.55324e-06	4.75	3.36	4.81	4.69	3.34	3.36
ENSMUSG00000026728.9	Vim	VIM	-1.47	10.15	1.11341e-07	1.57612e-06	9.41	10.89	9.34	9.48	10.89	10.88
ENSMUSG00000054091.9	1810037I17Rik	1810037I17RIK	1.42	5.65	9.97955e-08	1.50409e-06	6.36	4.94	6.47	6.24	4.91	4.97
ENSMUSG00000058571.11	Gpc6	GPC6	-1.63	3.79	1.14458e-07	1.5894e-06	2.97	4.61	3.04	2.9	4.54	4.67
ENSMUSG00000021451.16	Sema4d	SEMA4D	-1.55	3.46	1.16828e-07	1.59793e-06	2.7	4.24	2.67	2.71	4.21	4.26
ENSMUSG00000032382.14	Snx1	SNX1	1.13	6.97	1.01815e-07	1.51208e-06	7.54	6.41	7.54	7.53	6.4	6.42
ENSMUSG00000028452.7	Vcp	VCP	-1.38	8.66	1.08263e-07	1.55324e-06	7.98	9.36	7.9	8.05	9.37	9.34
ENSMUSG00000024290.9	Rock1	ROCK1	-1.15	6.29	1.02061e-07	1.51208e-06	5.72	6.86	5.68	5.75	6.87	6.85
ENSMUSG00000020390.12	Ube2b	UBE2B	1.48	7.28	1.03326e-07	1.51802e-06	8.03	6.54	8.13	7.92	6.47	6.61
ENSMUSG00000054619.7	Mettl7a1	METTL7A1	1.82	2.5	1.22057e-07	1.62713e-06	3.41	1.6	3.39	3.42	1.54	1.63
ENSMUSG00000034729.16	Mrps10	MRPS10	1.42	5.43	1.02214e-07	1.51208e-06	6.14	4.72	6.25	6.03	4.72	4.72
ENSMUSG00000074212.7	Dnajb14	DNAJB14	1.33	6.09	1.01474e-07	1.51208e-06	6.75	5.42	6.85	6.65	5.42	5.42
ENSMUSG00000053581.13	Zfand2a	ZFAND2A	1.23	5.91	1.0142e-07	1.51208e-06	6.52	5.29	6.45	6.59	5.32	5.26
ENSMUSG00000020231.15	Dip2a	DIP2A	-1.32	5.37	1.04863e-07	1.53356e-06	4.71	6.03	4.79	4.63	6.06	6
ENSMUSG00000078427.3	Sarnp	SARNP	1.22	6.67	1.02352e-07	1.51238e-06	7.28	6.06	7.35	7.21	6.07	6.05
ENSMUSG00000031697.12	Orc6	ORC6	1.33	6.46	1.02015e-07	1.51208e-06	7.12	5.79	7.19	7.06	5.86	5.72
ENSMUSG00000067365.10	Tmem128	TMEM128	1.35	5.8	1.02111e-07	1.51208e-06	6.48	5.13	6.58	6.38	5.15	5.11
ENSMUSG00000033970.15	Rfc3	RFC3	1.34	6.53	1.02638e-07	1.51311e-06	7.2	5.87	7.3	7.1	5.85	5.88
ENSMUSG00000008668.15	Rps18	RPS18	1.87	11.13	1.18567e-07	1.61077e-06	12.06	10.2	12.22	11.9	10.16	10.23
ENSMUSG00000048490.14	Nrip1	NRIP1	-1.31	4.47	1.11772e-07	1.57873e-06	3.82	5.12	3.87	3.77	5.13	5.12
ENSMUSG00000035203.16	Epn1	EPN1	-1.14	6.02	1.04653e-07	1.53224e-06	5.45	6.59	5.42	5.48	6.59	6.59
ENSMUSG00000066406.15	Akap13	AKAP13	-1.88	5.91	1.06754e-07	1.54584e-06	4.97	6.86	5.17	4.77	6.85	6.85
ENSMUSG00000033653.18	Vps8	VPS8	-1.41	4.54	1.12848e-07	1.58519e-06	3.84	5.25	3.76	3.92	5.2	5.29
ENSMUSG00000071662.4	Polr2g	POLR2G	1.14	5.99	1.03978e-07	1.52585e-06	6.55	5.42	6.59	6.52	5.39	5.44
ENSMUSG00000004040.16	Stat3	STAT3	-1.18	6.51	1.05903e-07	1.54524e-06	5.93	7.09	5.9	5.95	7.05	7.14
ENSMUSG00000038976.12	Ppp1r9b	PPP1R9B	-1.21	6.16	1.06071e-07	1.54584e-06	5.55	6.77	5.61	5.5	6.79	6.74
ENSMUSG00000031217.8	Efnb1	EFNB1	-1.62	3.64	1.21773e-07	1.62504e-06	2.83	4.45	2.72	2.94	4.44	4.46
ENSMUSG00000031626.17	Sorbs2	SORBS2	-2.08	2.55	1.27487e-07	1.6598e-06	1.52	3.59	1.44	1.58	3.66	3.52
ENSMUSG00000041840.8	Haus1	HAUS1	1.32	5.12	1.07525e-07	1.55124e-06	5.78	4.46	5.86	5.69	4.43	4.49
ENSMUSG00000035671.6	Zswim4	ZSWIM4	-1.23	5.3	1.08867e-07	1.55484e-06	4.69	5.92	4.75	4.63	5.9	5.93
ENSMUSG00000036632.9	Alg5	ALG5	1.28	6	1.0556e-07	1.542e-06	6.64	5.37	6.72	6.56	5.33	5.4
ENSMUSG00000044496.6	2510039O18Rik	2510039O18RIK	-1.16	5.51	1.08551e-07	1.55484e-06	4.94	6.09	4.92	4.95	6.13	6.06
ENSMUSG00000006315.9	Tmem147	TMEM147	1.27	6.44	1.06393e-07	1.54584e-06	7.08	5.81	7.16	6.99	5.82	5.81
ENSMUSG00000056209.7	Npm3	NPM3	1.37	6.43	1.06403e-07	1.54584e-06	7.11	5.74	7.22	7	5.73	5.75
ENSMUSG00000071659.4	Hnrnpul2	HNRNPUL2	-1.19	6.35	1.07322e-07	1.55006e-06	5.76	6.95	5.78	5.74	6.9	7
ENSMUSG00000037089.11	Slc35b2	SLC35B2	1.16	7.01	1.07996e-07	1.55324e-06	7.59	6.42	7.63	7.55	6.42	6.43
ENSMUSG00000029651.16	Mtus2	MTUS2	-1.88	2.91	1.28519e-07	1.66428e-06	1.98	3.84	2.09	1.85	3.86	3.83
ENSMUSG00000004667.18	Polr2e	POLR2E	1.4	7	1.08052e-07	1.55324e-06	7.7	6.3	7.8	7.59	6.26	6.34
ENSMUSG00000028982.9	Slc25a33	SLC25A33	1.47	4.73	1.11255e-07	1.57612e-06	5.47	4	5.58	5.37	4.04	3.95
ENSMUSG00000048489.12	Depp1	DEPP1	1.91	3.1	1.26277e-07	1.65075e-06	4.05	2.16	3.95	4.16	2.06	2.24
ENSMUSG00000032180.11	Tmed1	TMED1	1.42	5.86	1.06729e-07	1.54584e-06	6.56	5.14	6.68	6.45	5.17	5.12
ENSMUSG00000038485.6	Socs7	SOCS7	-1.24	5.16	1.1091e-07	1.57524e-06	4.54	5.78	4.58	4.49	5.81	5.74
ENSMUSG00000000563.17	Atp5f1	ATP5F1	1.38	8.61	1.14384e-07	1.5894e-06	9.3	7.93	9.39	9.22	7.94	7.91
ENSMUSG00000027566.15	Psma7	PSMA7	1.51	8.84	1.15355e-07	1.59316e-06	9.59	8.09	9.71	9.47	8.1	8.07
ENSMUSG00000047843.16	Bri3	BRI3	1.17	5.94	1.06789e-07	1.54584e-06	6.53	5.36	6.57	6.49	5.31	5.4
ENSMUSG00000062078.15	Qk	QK	-1.24	6.85	1.09214e-07	1.55807e-06	6.22	7.47	6.17	6.28	7.51	7.43
ENSMUSG00000027679.13	Dnajc19	DNAJC19	1.5	4.63	1.13272e-07	1.58767e-06	5.38	3.88	5.48	5.28	3.81	3.94
ENSMUSG00000020241.13	Col6a2	COL6A2	-1.59	3.62	1.25125e-07	1.65073e-06	2.83	4.42	2.79	2.87	4.36	4.47
ENSMUSG00000031262.12	Cenpi	CENPI	1.16	5.36	1.08672e-07	1.55484e-06	5.94	4.78	5.96	5.92	4.82	4.74
ENSMUSG00000028630.9	Dyrk2	DYRK2	-1.17	5.56	1.10245e-07	1.56928e-06	4.97	6.14	4.93	5	6.12	6.17
ENSMUSG00000026049.11	Tex30	TEX30	1.68	6.18	1.0827e-07	1.55324e-06	7.02	5.34	7.19	6.85	5.35	5.32
ENSMUSG00000021466.12	Ptch1	PTCH1	-1.18	5.38	1.11142e-07	1.57612e-06	4.8	5.97	4.82	4.77	6	5.94
ENSMUSG00000026413.12	Pkp1	PKP1	-2.31	2.12	1.29458e-07	1.66811e-06	0.98	3.28	1.07	0.87	3.34	3.21
ENSMUSG00000031402.12	Mpp1	MPP1	1.2	8.08	1.13921e-07	1.5894e-06	8.68	7.48	8.7	8.66	7.45	7.51
ENSMUSG00000029319.8	Coq2	COQ2	1.22	6.38	1.08857e-07	1.55484e-06	6.98	5.77	7.05	6.92	5.81	5.73
ENSMUSG00000021917.16	Spcs1	SPCS1	1.31	7.22	1.11724e-07	1.57873e-06	7.88	6.57	7.96	7.79	6.54	6.6
ENSMUSG00000026035.15	Ppil3	PPIL3	1.24	5.37	1.10467e-07	1.57069e-06	5.99	4.74	6.06	5.92	4.77	4.72
ENSMUSG00000026966.6	Ssna1	SSNA1	1.22	5.79	1.09635e-07	1.56233e-06	6.39	5.18	6.47	6.32	5.19	5.16
ENSMUSG00000027966.20	Col11a1	COL11A1	-2.28	1.84	1.28257e-07	1.66428e-06	0.71	2.99	0.68	0.72	2.99	2.97
ENSMUSG00000022956.11	Atp5o	ATP5O	1.42	8.04	1.15253e-07	1.59316e-06	8.75	7.33	8.86	8.64	7.32	7.34
ENSMUSG00000021301.9	Hecw1	HECW1	-1.53	3.67	1.27468e-07	1.6598e-06	2.91	4.43	2.96	2.85	4.46	4.39
ENSMUSG00000045410.18	Akr1e1	AKR1E1	1.15	5.2	1.11916e-07	1.57902e-06	5.77	4.62	5.81	5.73	4.63	4.62
ENSMUSG00000018923.13	Med11	MED11	1.58	5.11	1.12996e-07	1.58553e-06	5.9	4.33	6.04	5.76	4.29	4.36
ENSMUSG00000037349.9	Nudt22	NUDT22	1.67	2.97	1.31931e-07	1.66941e-06	3.8	2.15	3.86	3.75	2.17	2.1
ENSMUSG00000029911.14	Ssbp1	SSBP1	1.42	6.99	1.12596e-07	1.58339e-06	7.7	6.29	7.82	7.58	6.28	6.29
ENSMUSG00000024968.14	Rcor2	RCOR2	-1.17	6.12	1.12559e-07	1.58339e-06	5.53	6.7	5.54	5.52	6.65	6.75
ENSMUSG00000075254.12	Heg1	HEG1	-1.34	4.54	1.20465e-07	1.61938e-06	3.88	5.21	3.94	3.8	5.2	5.22
ENSMUSG00000014769.10	Psmb1	PSMB1	1.35	8.35	1.18116e-07	1.60806e-06	9.03	7.67	9.11	8.95	7.64	7.71
ENSMUSG00000074582.10	Arfgef2	ARFGEF2	-1.24	4.93	1.17512e-07	1.60495e-06	4.31	5.55	4.37	4.26	5.56	5.54
ENSMUSG00000016510.11	Mtif3	MTIF3	1.23	4.87	1.15654e-07	1.59316e-06	5.48	4.25	5.52	5.44	4.21	4.3
ENSMUSG00000019792.8	Trmt11	TRMT11	1.24	4.53	1.18415e-07	1.61042e-06	5.16	3.92	5.2	5.11	3.93	3.89
ENSMUSG00000062981.5	Mrpl42	MRPL42	1.24	5.71	1.12125e-07	1.58023e-06	6.33	5.08	6.41	6.25	5.09	5.08
ENSMUSG00000020988.9	L2hgdh	L2HGDH	1.12	5.25	1.13547e-07	1.5894e-06	5.81	4.69	5.8	5.82	4.67	4.71
ENSMUSG00000028273.15	Pdlim5	PDLIM5	-1.35	7.44	1.16095e-07	1.59753e-06	6.76	8.12	6.67	6.85	8.09	8.14
ENSMUSG00000031902.10	Nfatc3	NFATC3	-1.3	5.5	1.1544e-07	1.59316e-06	4.85	6.15	4.83	4.87	6.23	6.07
ENSMUSG00000041133.11	Smc1a	SMC1A	-1.49	6.81	1.14447e-07	1.5894e-06	6.07	7.55	5.94	6.19	7.58	7.53
ENSMUSG00000024054.14	Smchd1	SMCHD1	-1.15	6.99	1.14512e-07	1.5894e-06	6.42	7.56	6.44	6.39	7.59	7.54
ENSMUSG00000034981.9	Parm1	PARM1	-2.58	1.95	1.32135e-07	1.66941e-06	0.68	3.23	0.47	0.85	3.28	3.19
ENSMUSG00000031068.8	Glrx3	GLRX3	1.32	7.59	1.16768e-07	1.59793e-06	8.25	6.93	8.34	8.16	6.94	6.92
ENSMUSG00000063179.13	Pstk	PSTK	1.56	4.66	1.19012e-07	1.61185e-06	5.44	3.88	5.57	5.31	3.85	3.91
ENSMUSG00000091803.7	Cox16	COX16	1.58	4.95	1.16873e-07	1.59793e-06	5.73	4.16	5.87	5.6	4.14	4.18
ENSMUSG00000051177.16	Plcb1	PLCB1	-1.57	3.8	1.29956e-07	1.66887e-06	3.02	4.59	2.94	3.09	4.53	4.64
ENSMUSG00000078302.5	Foxd1	FOXD1	-2	3.58	1.33224e-07	1.67491e-06	2.58	4.58	2.59	2.57	4.45	4.71
ENSMUSG00000018501.17	Ncor1	NCOR1	-1.21	6.73	1.15004e-07	1.59316e-06	6.12	7.33	6.18	6.06	7.35	7.31
ENSMUSG00000036764.12	Dnajc12	DNAJC12	1.75	2.73	1.37018e-07	1.68613e-06	3.61	1.86	3.66	3.56	1.81	1.9
ENSMUSG00000034088.15	Hdlbp	HDLBP	-1.44	8.5	1.21608e-07	1.62504e-06	7.78	9.21	7.68	7.88	9.21	9.22
ENSMUSG00000029486.13	Mrpl1	MRPL1	1.38	6.27	1.13874e-07	1.5894e-06	6.96	5.58	7.08	6.85	5.6	5.56
ENSMUSG00000036992.10	Nxt1	NXT1	1.36	5.54	1.14349e-07	1.5894e-06	6.22	4.86	6.33	6.11	4.87	4.85
ENSMUSG00000049521.2	Cdc42ep1	CDC42EP1	-1.2	5.92	1.15635e-07	1.59316e-06	5.32	6.52	5.38	5.26	6.53	6.51
ENSMUSG00000002308.16	Cd320	CD320	1.12	5.14	1.16316e-07	1.59793e-06	5.7	4.58	5.72	5.68	4.59	4.57
ENSMUSG00000046688.14	Tifa	TIFA	1.37	5.77	1.14463e-07	1.5894e-06	6.46	5.08	6.52	6.39	4.99	5.18
ENSMUSG00000025931.15	Paqr8	PAQR8	-1.53	3.38	1.35782e-07	1.68126e-06	2.62	4.15	2.59	2.64	4.14	4.14
ENSMUSG00000022175.9	Lrp10	LRP10	-1.26	6.19	1.16738e-07	1.59793e-06	5.56	6.82	5.49	5.63	6.86	6.77
ENSMUSG00000031818.12	Cox4i1	COX4I1	1.48	9.04	1.26041e-07	1.65075e-06	9.78	8.3	9.89	9.67	8.27	8.33
ENSMUSG00000039126.10	Prune2	PRUNE2	-2.83	2.61	1.41179e-07	1.69691e-06	1.2	4.03	1.55	0.84	4.05	4
ENSMUSG00000051989.11	Smim11	SMIM11	1.61	4.31	1.2576e-07	1.65073e-06	5.12	3.51	5.25	4.99	3.5	3.51
ENSMUSG00000045237.5	1110012L19Rik	1110012L19RIK	1.31	4.62	1.22563e-07	1.63048e-06	5.28	3.96	5.35	5.2	3.96	3.96
ENSMUSG00000030138.8	Bms1	BMS1	-1.11	6.69	1.18106e-07	1.60806e-06	6.14	7.25	6.12	6.15	7.26	7.24
ENSMUSG00000041773.8	Enc1	ENC1	-1.2	5.17	1.216e-07	1.62504e-06	4.58	5.77	4.54	4.61	5.8	5.74
ENSMUSG00000073125.10	Xlr3b	XLR3B	1.84	5.08	1.2089e-07	1.6217e-06	5.99	4.16	6.18	5.81	4.15	4.17
ENSMUSG00000000149.10	Gna12	GNA12	-1.28	6.29	1.19023e-07	1.61185e-06	5.65	6.93	5.57	5.73	6.96	6.9
ENSMUSG00000033014.12	Trim33	TRIM33	-1.13	6.13	1.18824e-07	1.61185e-06	5.56	6.69	5.54	5.59	6.71	6.66
ENSMUSG00000079418.3	Atg4a	ATG4A	1.46	5.81	1.17686e-07	1.60562e-06	6.54	5.09	6.66	6.42	5.04	5.14
ENSMUSG00000024855.10	Pacs1	PACS1	-1.61	3.63	1.37693e-07	1.68702e-06	2.83	4.44	2.9	2.76	4.5	4.38
ENSMUSG00000018858.15	Mrpl58	MRPL58	1.34	5.18	1.20409e-07	1.61938e-06	5.85	4.5	5.94	5.75	4.51	4.5
ENSMUSG00000058258.14	Idi1	IDI1	1.98	6.6	1.19759e-07	1.61668e-06	7.59	5.62	7.64	7.55	5.83	5.4
ENSMUSG00000040188.10	Scamp2	SCAMP2	-1.31	4.66	1.2745e-07	1.6598e-06	4	5.31	3.93	4.07	5.33	5.29
ENSMUSG00000117924.1	Tmem223	TMEM223	1.28	5.37	1.20009e-07	1.61835e-06	6.01	4.73	6.1	5.92	4.71	4.74
ENSMUSG00000069020.9	Urm1	URM1	1.14	5.42	1.19689e-07	1.61668e-06	5.99	4.86	6.03	5.95	4.87	4.83
ENSMUSG00000024222.17	Fkbp5	FKBP5	-1.22	4.86	1.25749e-07	1.65073e-06	4.25	5.47	4.22	4.29	5.5	5.44
ENSMUSG00000020032.14	Nuak1	NUAK1	-1.49	4.43	1.30941e-07	1.66925e-06	3.69	5.17	3.74	3.64	5.26	5.09
ENSMUSG00000041278.10	Ttc1	TTC1	1.07	5.86	1.19665e-07	1.61668e-06	6.39	5.33	6.4	6.39	5.33	5.32
ENSMUSG00000049580.12	Tsku	TSKU	-1.17	4.92	1.26245e-07	1.65075e-06	4.33	5.5	4.32	4.34	5.5	5.5
ENSMUSG00000024146.9	Cript	CRIPT	1.45	5.86	1.2018e-07	1.61895e-06	6.58	5.14	6.71	6.45	5.16	5.12
ENSMUSG00000001280.13	Sp1	SP1	-1.16	6.7	1.21686e-07	1.62504e-06	6.12	7.28	6.07	6.16	7.26	7.29
ENSMUSG00000024959.14	Bad	BAD	1.31	4.88	1.24176e-07	1.64851e-06	5.54	4.23	5.62	5.45	4.23	4.23
ENSMUSG00000040488.17	Ltbp4	LTBP4	-1.95	4.76	1.30509e-07	1.66925e-06	3.79	5.73	4	3.58	5.66	5.81
ENSMUSG00000062661.6	Ncs1	NCS1	-1.31	6.54	1.22292e-07	1.62857e-06	5.88	7.19	5.95	5.82	7.26	7.12
ENSMUSG00000030615.12	Tmem126a	TMEM126A	1.53	5.91	1.20876e-07	1.6217e-06	6.68	5.15	6.82	6.54	5.19	5.11
ENSMUSG00000031897.9	Psmb10	PSMB10	1.22	4.79	1.25492e-07	1.65073e-06	5.39	4.18	5.34	5.45	4.17	4.18
ENSMUSG00000029464.10	Gpn3	GPN3	1.15	5.64	1.2107e-07	1.62242e-06	6.21	5.06	6.25	6.17	5.1	5.03
ENSMUSG00000069206.14	Zfp874a	ZFP874A	1.21	4.48	1.2874e-07	1.66428e-06	5.09	3.88	5.06	5.12	3.88	3.89
ENSMUSG00000070047.14	Fat1	FAT1	-2.02	7.03	1.25152e-07	1.65073e-06	6.02	8.04	6.23	5.8	8.06	8.02
ENSMUSG00000059897.5	Zfp930	ZFP930	1.45	5.52	1.22756e-07	1.63135e-06	6.24	4.8	6.36	6.12	4.82	4.77
ENSMUSG00000019737.14	Syne4	SYNE4	1.89	2.21	1.49514e-07	1.73029e-06	3.16	1.28	3.13	3.19	1.28	1.26
ENSMUSG00000109941.1	Exosc6	EXOSC6	11.94	-1.73	3.83458e-10	4.42555e-07	4.25	-5.44	4.24	4.25	-7.79	-7.61
ENSMUSG00000029177.9	Cenpa	CENPA	1.32	7.44	1.25938e-07	1.65075e-06	8.11	6.79	8.2	8.01	6.78	6.79
ENSMUSG00000024346.6	Pfdn1	PFDN1	1.2	6.95	1.24416e-07	1.64999e-06	7.55	6.35	7.61	7.49	6.33	6.37
ENSMUSG00000006717.7	Acot13	ACOT13	1.92	5.52	1.24764e-07	1.65073e-06	6.48	4.56	6.68	6.28	4.5	4.62
ENSMUSG00000064090.14	Vrk2	VRK2	1.26	4.08	1.3499e-07	1.68126e-06	4.71	3.46	4.73	4.7	3.46	3.45
ENSMUSG00000059273.9	Zc3h4	ZC3H4	-1.42	6	1.25365e-07	1.65073e-06	5.29	6.7	5.41	5.17	6.69	6.71
ENSMUSG00000055116.8	Arntl	ARNTL	-1.45	4.38	1.35835e-07	1.68126e-06	3.66	5.11	3.56	3.75	5.07	5.14
ENSMUSG00000022748.8	Cmss1	CMSS1	1.36	3.93	1.38119e-07	1.68702e-06	4.61	3.25	4.66	4.56	3.26	3.22
ENSMUSG00000073987.4	Ggh	GGH	1.57	4.07	1.37452e-07	1.68669e-06	4.86	3.29	4.95	4.77	3.21	3.37
ENSMUSG00000090247.7	Bloc1s1	BLOC1S1	1.49	5.7	1.25222e-07	1.65073e-06	6.45	4.96	6.58	6.31	4.95	4.96
ENSMUSG00000043061.10	Tmem18	TMEM18	1.18	5.06	1.28113e-07	1.66428e-06	5.65	4.47	5.7	5.6	4.49	4.45
ENSMUSG00000021493.15	Pdlim7	PDLIM7	-1.09	6.34	1.26705e-07	1.65466e-06	5.79	6.88	5.78	5.8	6.87	6.9
ENSMUSG00000027287.14	Snap23	SNAP23	1.18	5.98	1.25173e-07	1.65073e-06	6.57	5.39	6.64	6.51	5.39	5.39
ENSMUSG00000023960.13	Enpp5	ENPP5	1.53	3.09	1.49812e-07	1.73153e-06	3.86	2.33	3.83	3.87	2.3	2.34
ENSMUSG00000031158.11	Timm17b	TIMM17B	1.19	5.12	1.29117e-07	1.66746e-06	5.71	4.53	5.72	5.7	4.46	4.58
ENSMUSG00000024803.9	Ankrd1	ANKRD1	-1.27	6	1.28741e-07	1.66428e-06	5.37	6.64	5.42	5.31	6.71	6.57
ENSMUSG00000002477.5	Snrpd1	SNRPD1	1.37	7.31	1.30008e-07	1.66887e-06	7.99	6.63	8.1	7.89	6.65	6.61
ENSMUSG00000027864.9	Ptgfrn	PTGFRN	-1.65	7.52	1.32281e-07	1.66961e-06	6.7	8.34	6.55	6.85	8.32	8.37
ENSMUSG00000001995.9	Sipa1l2	SIPA1L2	-1.17	5.27	1.3156e-07	1.66941e-06	4.69	5.86	4.72	4.66	5.89	5.83
ENSMUSG00000002326.6	Gmpr2	GMPR2	1.22	5.11	1.30298e-07	1.66925e-06	5.72	4.5	5.77	5.68	4.56	4.44
ENSMUSG00000052299.9	Ltn1	LTN1	-1.1	6.41	1.29319e-07	1.66811e-06	5.86	6.96	5.85	5.87	6.94	6.98
ENSMUSG00000027313.3	Chac1	CHAC1	-1.56	3.36	1.52163e-07	1.74146e-06	2.58	4.13	2.56	2.6	4.17	4.09
ENSMUSG00000006715.11	Gmnn	GMNN	1.32	5.86	1.28124e-07	1.66428e-06	6.52	5.2	6.62	6.41	5.22	5.18
ENSMUSG00000035297.14	Cops4	COPS4	1.12	7.6	1.32494e-07	1.67065e-06	8.16	7.04	8.17	8.16	7.04	7.04
ENSMUSG00000062949.13	Atp11c	ATP11C	-1.13	5.55	1.31171e-07	1.66925e-06	4.98	6.12	4.96	5.01	6.14	6.09
ENSMUSG00000046441.5	Cmtr2	CMTR2	1.12	5.62	1.28701e-07	1.66428e-06	6.19	5.06	6.22	6.14	5.08	5.04
ENSMUSG00000050856.16	Atp5k	ATP5K	1.55	7.04	1.30933e-07	1.66925e-06	7.81	6.27	7.96	7.66	6.25	6.28
ENSMUSG00000035376.10	Hacd2	HACD2	1.1	5.38	1.29689e-07	1.66811e-06	5.93	4.84	5.96	5.9	4.84	4.83
ENSMUSG00000030811.14	Fbxl19	FBXL19	-1.2	6.06	1.30567e-07	1.66925e-06	5.46	6.66	5.53	5.39	6.65	6.66
ENSMUSG00000039976.4	Tbc1d16	TBC1D16	-1.53	4.51	1.40833e-07	1.69691e-06	3.75	5.28	3.74	3.76	5.17	5.38
ENSMUSG00000017485.11	Top2b	TOP2B	-1.44	7.89	1.35554e-07	1.68126e-06	7.17	8.61	7.06	7.28	8.58	8.64
ENSMUSG00000024383.9	Map3k2	MAP3K2	-1.14	5.86	1.31219e-07	1.66925e-06	5.29	6.42	5.3	5.27	6.46	6.38
ENSMUSG00000024997.7	Prdx3	PRDX3	1.11	6.43	1.29565e-07	1.66811e-06	6.98	5.88	6.98	6.98	5.91	5.84
ENSMUSG00000041353.12	Tmem29	TMEM29	1.67	3.93	1.44765e-07	1.70912e-06	4.76	3.09	4.89	4.63	3.11	3.07
ENSMUSG00000037058.16	Paip2	PAIP2	1.19	7.76	1.34457e-07	1.68126e-06	8.36	7.15	8.4	8.31	7.13	7.18
ENSMUSG00000073468.12	Sft2d1	SFT2D1	1.38	4.32	1.39774e-07	1.69068e-06	5.01	3.63	5.09	4.93	3.66	3.6
ENSMUSG00000049532.11	Sall2	SALL2	-1.22	4.73	1.38527e-07	1.68702e-06	4.12	5.34	4.08	4.16	5.36	5.32
ENSMUSG00000022781.8	Pak2	PAK2	-1.16	6.61	1.31637e-07	1.66941e-06	6.03	7.2	6	6.06	7.24	7.15
ENSMUSG00000021537.9	Cetn3	CETN3	1.26	6.42	1.30431e-07	1.66925e-06	7.05	5.79	7.14	6.97	5.75	5.83
ENSMUSG00000029817.11	Tra2a	TRA2A	1.19	7.77	1.35393e-07	1.68126e-06	8.37	7.18	8.4	8.34	7.14	7.22
ENSMUSG00000002227.15	Mov10	MOV10	-1.33	4.52	1.41554e-07	1.69731e-06	3.86	5.19	3.85	3.86	5.12	5.25
ENSMUSG00000078153.3	Psme2b	PSME2B	1.51	3.54	1.50447e-07	1.7317e-06	4.29	2.79	4.37	4.22	2.75	2.82
ENSMUSG00000022421.19	Nptxr	NPTXR	-1.47	4.22	1.45575e-07	1.71254e-06	3.49	4.96	3.42	3.56	5.03	4.89
ENSMUSG00000019088.13	Dnase1l1	DNASE1L1	1.69	2.93	1.57472e-07	1.77273e-06	3.77	2.09	3.8	3.74	2	2.17
ENSMUSG00000063800.5	Prpf38a	PRPF38A	1.37	6.48	1.31301e-07	1.66925e-06	7.17	5.79	7.28	7.05	5.77	5.81
ENSMUSG00000071302.10	2610044O15Rik8	2610044O15RIK8	1.2	4.55	1.3857e-07	1.68702e-06	5.16	3.96	5.19	5.11	3.95	3.95
ENSMUSG00000021576.6	Pdcd6	PDCD6	1.22	7.08	1.33654e-07	1.67703e-06	7.69	6.47	7.76	7.62	6.49	6.46
ENSMUSG00000020949.9	Fkbp3	FKBP3	1.32	7.61	1.3596e-07	1.68126e-06	8.27	6.95	8.36	8.18	6.99	6.91
ENSMUSG00000005078.16	Jkamp	JKAMP	1.15	5.76	1.31341e-07	1.66925e-06	6.33	5.19	6.39	6.27	5.18	5.19
ENSMUSG00000042323.17	Pbrm1	PBRM1	-1.29	7.06	1.3455e-07	1.68126e-06	6.41	7.7	6.32	6.5	7.69	7.72
ENSMUSG00000027835.11	Pdcd10	PDCD10	1.67	6.58	1.32715e-07	1.67179e-06	7.41	5.74	7.59	7.23	5.74	5.74
ENSMUSG00000015804.14	Med28	MED28	1.21	6.73	1.32978e-07	1.67345e-06	7.34	6.12	7.41	7.26	6.11	6.13
ENSMUSG00000028648.13	Ndufs5	NDUFS5	1.17	5.67	1.31912e-07	1.66941e-06	6.26	5.09	6.32	6.19	5.11	5.06
ENSMUSG00000032475.15	Nck1	NCK1	1.2	5.96	1.32127e-07	1.66941e-06	6.55	5.36	6.63	6.48	5.33	5.38
ENSMUSG00000002661.14	Alkbh7	ALKBH7	1.69	3.05	1.58479e-07	1.77848e-06	3.9	2.21	3.98	3.81	2.16	2.25
ENSMUSG00000022820.4	Ndufb4	NDUFB4	2.03	5.71	1.34124e-07	1.67964e-06	6.72	4.7	6.94	6.51	4.62	4.78
ENSMUSG00000044018.3	Mrpl50	MRPL50	1.29	6.63	1.33477e-07	1.67645e-06	7.28	5.98	7.37	7.18	6.01	5.96
ENSMUSG00000030298.10	Sec13	SEC13	1.34	7.33	1.36343e-07	1.68437e-06	8	6.66	8.1	7.9	6.7	6.62
ENSMUSG00000031207.16	Msn	MSN	-1.4	8.09	1.40745e-07	1.69691e-06	7.39	8.79	7.3	7.49	8.83	8.75
ENSMUSG00000021701.8	Plk2	PLK2	-1.21	5.71	1.35684e-07	1.68126e-06	5.1	6.31	5.11	5.09	6.38	6.24
ENSMUSG00000021838.17	Samd4	SAMD4	-1.28	5.74	1.3582e-07	1.68126e-06	5.1	6.38	5.18	5.01	6.41	6.34
ENSMUSG00000095990.1	Zfp97	ZFP97	1.19	4.38	1.42565e-07	1.70214e-06	4.97	3.79	4.99	4.96	3.79	3.78
ENSMUSG00000030616.15	Sytl2	SYTL2	-2.14	2.3	1.64338e-07	1.81385e-06	1.24	3.38	1.11	1.36	3.41	3.33
ENSMUSG00000078920.3	Ifi47	IFI47	2.71	1	1.45344e-07	1.7114e-06	2.36	-0.32	2.42	2.29	-0.4	-0.31
ENSMUSG00000048279.19	Sacs	SACS	-1.79	6.95	1.36861e-07	1.68589e-06	6.05	7.84	6.16	5.94	8.01	7.68
ENSMUSG00000020459.14	Mtif2	MTIF2	1.07	5.52	1.33864e-07	1.67802e-06	6.06	4.99	6.07	6.05	5	4.98
ENSMUSG00000054720.12	Lrrc8c	LRRC8C	-1.22	5.64	1.36746e-07	1.68589e-06	5.03	6.24	4.99	5.06	6.31	6.18
ENSMUSG00000078861.8	Zfp931	ZFP931	1.82	3.5	1.55478e-07	1.76065e-06	4.41	2.59	4.55	4.27	2.56	2.62
ENSMUSG00000024238.15	Zeb1	ZEB1	-1.14	5.17	1.39084e-07	1.68801e-06	4.61	5.74	4.63	4.58	5.73	5.75
ENSMUSG00000043162.7	Pyurf	PYURF	1.27	4.6	1.41588e-07	1.69731e-06	5.23	3.98	5.3	5.17	4	3.95
ENSMUSG00000028822.11	Tmem50a	TMEM50A	1.12	6.57	1.35265e-07	1.68126e-06	7.13	6.01	7.17	7.09	5.99	6.03
ENSMUSG00000029684.14	Wasl	WASL	-1.35	4.98	1.41853e-07	1.69731e-06	4.31	5.66	4.41	4.21	5.68	5.64
ENSMUSG00000029641.8	Rasl11a	RASL11A	1.4	7.65	1.3989e-07	1.69068e-06	8.35	6.95	8.4	8.3	6.85	7.05
ENSMUSG00000042595.7	Fam199x	FAM199X	-1.37	5.83	1.37832e-07	1.68702e-06	5.15	6.52	5.04	5.26	6.48	6.55
ENSMUSG00000040021.13	Lats1	LATS1	-1.17	6.34	1.3677e-07	1.68589e-06	5.75	6.92	5.7	5.81	6.94	6.9
ENSMUSG00000032299.10	Commd4	COMMD4	1.1	5.48	1.35905e-07	1.68126e-06	6.04	4.94	6.07	6	4.94	4.93
ENSMUSG00000026775.9	Yme1l1	YME1L1	1.22	8.38	1.44129e-07	1.70795e-06	8.99	7.78	9.04	8.95	7.75	7.79
ENSMUSG00000047921.17	Trappc9	TRAPPC9	-1.37	3.79	1.56072e-07	1.76317e-06	3.1	4.47	3.08	3.12	4.47	4.48
ENSMUSG00000021028.8	Mbip	MBIP	1.33	4.35	1.45928e-07	1.71512e-06	5.02	3.68	5.09	4.94	3.69	3.68
ENSMUSG00000025040.13	Fundc1	FUNDC1	1.12	5.27	1.37262e-07	1.68613e-06	5.83	4.71	5.85	5.81	4.67	4.75
ENSMUSG00000060803.6	Gstp1	GSTP1	1.12	7.47	1.40315e-07	1.69422e-06	8.04	6.91	8.01	8.06	6.9	6.91
ENSMUSG00000028370.7	Pappa	PAPPA	-2.63	1.76	1.60704e-07	1.79142e-06	0.46	3.08	0.65	0.23	3.1	3.04
ENSMUSG00000027340.15	Slc23a2	SLC23A2	-1.19	4.89	1.44384e-07	1.70795e-06	4.29	5.49	4.26	4.33	5.52	5.47
ENSMUSG00000063787.4	Chchd1	CHCHD1	1.91	6.5	1.38198e-07	1.68702e-06	7.46	5.54	7.67	7.24	5.49	5.6
ENSMUSG00000032582.14	Rbm6	RBM6	-1.13	6.02	1.38864e-07	1.68784e-06	5.46	6.59	5.51	5.42	6.59	6.59
ENSMUSG00000069729.14	Arid1b	ARID1B	-1.49	5.33	1.42708e-07	1.70227e-06	4.59	6.07	4.73	4.44	6.08	6.06
ENSMUSG00000019822.12	Smpd2	SMPD2	1.15	4.87	1.41864e-07	1.69731e-06	5.45	4.29	5.4	5.48	4.29	4.3
ENSMUSG00000031197.11	Vbp1	VBP1	1.38	6.85	1.39142e-07	1.68801e-06	7.54	6.16	7.65	7.43	6.2	6.12
ENSMUSG00000028671.16	Gale	GALE	1.21	4.3	1.48513e-07	1.72493e-06	4.91	3.7	4.89	4.93	3.72	3.68
ENSMUSG00000001707.8	Eef1e1	EEF1E1	1.19	6.48	1.38231e-07	1.68702e-06	7.08	5.88	7.15	7	5.9	5.86
ENSMUSG00000052105.17	Mtcl1	MTCL1	-1.28	5.09	1.44145e-07	1.70795e-06	4.45	5.73	4.54	4.36	5.72	5.74
ENSMUSG00000021993.10	Mipep	MIPEP	1.1	5.06	1.412e-07	1.69691e-06	5.61	4.51	5.6	5.62	4.52	4.5
ENSMUSG00000036698.11	Ago2	AGO2	-1.54	6.14	1.41097e-07	1.69691e-06	5.38	6.92	5.52	5.23	6.92	6.91
ENSMUSG00000049751.6	Rpl36al	RPL36AL	1.41	8.27	1.46916e-07	1.72042e-06	8.97	7.56	9.08	8.87	7.53	7.6
ENSMUSG00000027131.3	Emc4	EMC4	1.14	5.72	1.38664e-07	1.68702e-06	6.29	5.15	6.35	6.24	5.17	5.14
ENSMUSG00000028609.6	Magoh	MAGOH	1.22	6.53	1.39696e-07	1.69068e-06	7.14	5.92	7.22	7.06	5.89	5.94
ENSMUSG00000026688.5	Mgst3	MGST3	1.14	5.77	1.39387e-07	1.68939e-06	6.34	5.21	6.36	6.31	5.15	5.26
ENSMUSG00000029094.12	Afap1	AFAP1	-1.61	5.3	1.46318e-07	1.71656e-06	4.49	6.1	4.66	4.32	6.12	6.08
ENSMUSG00000042043.6	Tbca	TBCA	1.4	6.82	1.41895e-07	1.69731e-06	7.52	6.12	7.63	7.4	6.07	6.17
ENSMUSG00000075266.5	Cenpw	CENPW	1.34	4.41	1.50853e-07	1.73328e-06	5.08	3.74	5.17	5	3.75	3.73
ENSMUSG00000038481.13	Cdk19	CDK19	-1.27	5.56	1.44719e-07	1.70912e-06	4.92	6.2	4.83	5.01	6.17	6.22
ENSMUSG00000040407.18	Akap9	AKAP9	-1.56	6.39	1.43754e-07	1.70778e-06	5.61	7.17	5.76	5.46	7.14	7.19
ENSMUSG00000078878.9	Gm14305	GM14305	1.57	5.3	1.43837e-07	1.70778e-06	6.09	4.52	6.23	5.94	4.49	4.55
ENSMUSG00000028530.14	Jak1	JAK1	-1.34	7.05	1.44884e-07	1.70912e-06	6.38	7.71	6.28	6.48	7.72	7.71
ENSMUSG00000027652.15	Ralgapb	RALGAPB	-1.08	6.17	1.4324e-07	1.7048e-06	5.62	6.7	5.63	5.62	6.72	6.69
ENSMUSG00000017631.19	Abr	ABR	-1.11	6.22	1.4332e-07	1.7048e-06	5.66	6.77	5.64	5.68	6.81	6.73
ENSMUSG00000022677.15	Fopnl	FOPNL	1.63	5.92	1.42238e-07	1.69982e-06	6.74	5.11	6.9	6.57	5.1	5.12
ENSMUSG00000036781.13	Rps27l	RPS27L	1.69	8.44	1.51358e-07	1.73594e-06	9.28	7.6	9.45	9.11	7.57	7.62
ENSMUSG00000033209.17	Ttc28	TTC28	-1.78	3.74	1.65775e-07	1.81983e-06	2.85	4.63	3.03	2.67	4.61	4.65
ENSMUSG00000028798.16	Eif3i	EIF3I	1.4	8.49	1.51796e-07	1.73941e-06	9.19	7.8	9.3	9.08	7.78	7.81
ENSMUSG00000028266.17	Lmo4	LMO4	-1.13	6.63	1.44312e-07	1.70795e-06	6.06	7.19	6.03	6.09	7.15	7.23
ENSMUSG00000063550.8	Nup98	NUP98	-1.11	6.78	1.45031e-07	1.70929e-06	6.22	7.34	6.21	6.24	7.38	7.3
ENSMUSG00000020267.6	Hint1	HINT1	1.37	8.6	1.53434e-07	1.74879e-06	9.28	7.92	9.37	9.19	7.88	7.95
ENSMUSG00000060679.14	Mrps9	MRPS9	1.13	5.79	1.42943e-07	1.70348e-06	6.36	5.22	6.41	6.3	5.24	5.21
ENSMUSG00000032875.8	Arhgef17	ARHGEF17	-1.32	7.04	1.46579e-07	1.71804e-06	6.38	7.7	6.48	6.28	7.7	7.7
ENSMUSG00000035325.16	Sec31a	SEC31A	-1.13	7.3	1.47531e-07	1.72205e-06	6.73	7.87	6.7	6.77	7.88	7.85
ENSMUSG00000041881.13	Ndufa7	NDUFA7	1.7	7.63	1.48737e-07	1.72597e-06	8.48	6.79	8.66	8.3	6.76	6.82
ENSMUSG00000034714.9	Ttyh2	TTYH2	-1.25	4.75	1.53351e-07	1.74879e-06	4.12	5.37	4.07	4.17	5.33	5.41
ENSMUSG00000020183.11	Cpm	CPM	-2.47	2.43	1.79255e-07	1.91196e-06	1.2	3.67	1.1	1.28	3.54	3.8
ENSMUSG00000028587.18	Orc1	ORC1	1.13	4.98	1.4848e-07	1.72493e-06	5.54	4.42	5.55	5.53	4.45	4.38
ENSMUSG00000031591.14	Asah1	ASAH1	1.11	7.23	1.48062e-07	1.72281e-06	7.79	6.68	7.77	7.81	6.66	6.7
ENSMUSG00000025786.17	Zdhhc3	ZDHHC3	-1.11	6.63	1.47068e-07	1.72062e-06	6.08	7.19	6.08	6.08	7.23	7.15
ENSMUSG00000053317.11	Sec61b	SEC61B	1.43	6.97	1.47533e-07	1.72205e-06	7.69	6.26	7.82	7.56	6.24	6.28
ENSMUSG00000025781.14	Atp5c1	ATP5C1	1.24	8.64	1.5622e-07	1.76329e-06	9.27	8.02	9.32	9.21	8.02	8.03
ENSMUSG00000025747.12	Tyms	TYMS	1.43	7.03	1.47944e-07	1.72281e-06	7.75	6.32	7.85	7.65	6.4	6.23
ENSMUSG00000096856.7	Gm10778	GM10778	1.49	3.9	1.63071e-07	1.80719e-06	4.64	3.16	4.73	4.55	3.11	3.2
ENSMUSG00000033326.15	Kdm4a	KDM4A	-1.19	6.5	1.48028e-07	1.72281e-06	5.91	7.1	5.84	5.98	7.07	7.13
ENSMUSG00000038160.7	Atg5	ATG5	1.08	5.67	1.46156e-07	1.71622e-06	6.21	5.13	6.25	6.18	5.14	5.12
ENSMUSG00000070426.12	Rnf121	RNF121	1.21	5.16	1.49105e-07	1.72867e-06	5.77	4.56	5.84	5.69	4.57	4.55
ENSMUSG00000020328.10	Nudcd2	NUDCD2	1.34	7.46	1.50856e-07	1.73328e-06	8.13	6.79	8.24	8.02	6.81	6.77
ENSMUSG00000037787.14	Apopt1	APOPT1	1.18	4.8	1.52247e-07	1.74146e-06	5.39	4.21	5.43	5.36	4.17	4.25
ENSMUSG00000055401.14	Fbxo6	FBXO6	1.12	4.74	1.52831e-07	1.74651e-06	5.3	4.18	5.3	5.31	4.17	4.19
ENSMUSG00000089669.7	Tnfsf13	TNFSF13	3.56	0.14	1.16565e-07	1.59793e-06	1.94	-1.56	2.01	1.85	-1.56	-1.71
ENSMUSG00000027810.14	Eif2a	EIF2A	1.1	7.42	1.51086e-07	1.73438e-06	7.97	6.87	7.99	7.95	6.87	6.86
ENSMUSG00000059669.8	Taf1b	TAF1B	1.18	4.79	1.52961e-07	1.74651e-06	5.38	4.21	5.43	5.34	4.18	4.23
ENSMUSG00000032563.16	Mrpl3	MRPL3	1.08	6.42	1.47592e-07	1.72205e-06	6.96	5.88	6.99	6.92	5.87	5.88
ENSMUSG00000025353.5	Ormdl2	ORMDL2	1.22	5.5	1.49326e-07	1.72968e-06	6.12	4.89	6.19	6.04	4.93	4.86
ENSMUSG00000034211.14	Mrps17	MRPS17	1.3	6.72	1.50049e-07	1.73153e-06	7.38	6.08	7.47	7.27	6.11	6.04
ENSMUSG00000033429.10	Mcee	MCEE	1.44	3.59	1.71185e-07	1.8601e-06	4.31	2.88	4.37	4.24	2.87	2.86
ENSMUSG00000029780.14	Nt5c3	NT5C3	1.2	5.42	1.50162e-07	1.73153e-06	6.02	4.82	6.09	5.95	4.84	4.79
ENSMUSG00000044627.11	Swi5	SWI5	1.36	7.83	1.55671e-07	1.76065e-06	8.52	7.15	8.61	8.42	7.1	7.21
ENSMUSG00000027423.15	Snx5	SNX5	1.17	8.57	1.60427e-07	1.79142e-06	9.16	7.98	9.16	9.15	7.97	7.99
ENSMUSG00000107283.3	Mpv17	MPV17	1.05	6.29	1.50442e-07	1.7317e-06	6.82	5.77	6.83	6.81	5.76	5.78
ENSMUSG00000002109.14	Ddb2	DDB2	1.84	2.99	1.82181e-07	1.92647e-06	3.92	2.08	4.02	3.8	2	2.15
ENSMUSG00000029999.14	Tgfa	TGFA	-1.86	2.84	1.86167e-07	1.94852e-06	1.92	3.77	1.78	2.05	3.8	3.75
ENSMUSG00000000538.18	Tom1l2	TOM1L2	-1.18	5.09	1.57454e-07	1.77273e-06	4.5	5.68	4.56	4.44	5.68	5.68
ENSMUSG00000017778.14	Cox7c	COX7C	1.38	8.06	1.58906e-07	1.78063e-06	8.75	7.37	8.84	8.65	7.31	7.43
ENSMUSG00000027274.16	Mkks	MKKS	1.25	4.45	1.61454e-07	1.79392e-06	5.07	3.83	5.13	5.02	3.81	3.85
ENSMUSG00000037993.8	Dhx38	DHX38	-1.38	5.85	1.54983e-07	1.75707e-06	5.16	6.54	5.28	5.04	6.52	6.55
ENSMUSG00000029020.13	Mfn2	MFN2	-1.1	5.73	1.54516e-07	1.756e-06	5.17	6.28	5.18	5.17	6.31	6.24
ENSMUSG00000030352.15	Tspan9	TSPAN9	-1.75	4.77	1.6436e-07	1.81385e-06	3.9	5.64	3.7	4.1	5.65	5.64
ENSMUSG00000035493.10	Tgfbi	TGFBI	-1.33	6.47	1.54132e-07	1.75363e-06	5.81	7.14	5.74	5.87	7.05	7.23
ENSMUSG00000061461.11	Smim20	SMIM20	1.44	5.4	1.54004e-07	1.75363e-06	6.12	4.69	6.25	6	4.63	4.73
ENSMUSG00000018286.6	Psmb6	PSMB6	1.4	7.98	1.59879e-07	1.78882e-06	8.68	7.29	8.8	8.56	7.28	7.29
ENSMUSG00000024754.13	Cemip2	CEMIP2	-1.18	5.65	1.55712e-07	1.76065e-06	5.06	6.24	5.11	5.01	6.29	6.19
ENSMUSG00000014856.12	Tmem208	TMEM208	1.69	5.53	1.54625e-07	1.756e-06	6.38	4.69	6.55	6.19	4.7	4.66
ENSMUSG00000053716.9	Dusp7	DUSP7	-1.14	5.04	1.60359e-07	1.79142e-06	4.48	5.62	4.47	4.48	5.64	5.59
ENSMUSG00000025731.16	Mettl26	METTL26	1.19	4.96	1.58005e-07	1.77718e-06	5.55	4.37	5.54	5.57	4.3	4.43
ENSMUSG00000037805.15	Rpl10a	RPL10A	1.52	10.61	1.7662e-07	1.89191e-06	11.38	9.86	11.48	11.27	9.84	9.87
ENSMUSG00000033581.17	Igf2bp2	IGF2BP2	-1.06	6.55	1.56425e-07	1.76405e-06	6.01	7.08	6.02	6.01	7.08	7.08
ENSMUSG00000037296.7	Lsm1	LSM1	1.37	5.84	1.54752e-07	1.756e-06	6.52	5.15	6.64	6.4	5.17	5.14
ENSMUSG00000030801.10	Kat8	KAT8	1.14	4.87	1.60949e-07	1.79142e-06	5.44	4.3	5.48	5.4	4.29	4.31
ENSMUSG00000035621.13	Midn	MIDN	-1.28	6.27	1.58152e-07	1.77727e-06	5.63	6.91	5.73	5.53	6.91	6.91
ENSMUSG00000029322.12	Plac8	PLAC8	2.66	2.21	1.95208e-07	2.00129e-06	3.54	0.89	3.72	3.34	0.79	0.97
ENSMUSG00000000827.18	Tpd52l2	TPD52L2	1.18	6.92	1.58537e-07	1.77848e-06	7.52	6.34	7.59	7.44	6.33	6.34
ENSMUSG00000110277.2	Gm45871	GM45871	1.72	4.17	1.72356e-07	1.86806e-06	5.04	3.31	5.17	4.9	3.4	3.23
ENSMUSG00000042737.9	Dpm3	DPM3	1.32	4.55	1.66185e-07	1.82121e-06	5.21	3.9	5.29	5.13	3.86	3.92
ENSMUSG00000021432.15	Slc35b3	SLC35B3	1.55	4.85	1.64411e-07	1.81385e-06	5.63	4.08	5.77	5.49	4.06	4.09
ENSMUSG00000026683.14	Nuf2	NUF2	1.27	6.55	1.59007e-07	1.78063e-06	7.19	5.92	7.28	7.1	5.96	5.88
ENSMUSG00000074865.11	Zfp934	ZFP934	1.47	3.6	1.8267e-07	1.92767e-06	4.34	2.87	4.41	4.27	2.82	2.92
ENSMUSG00000037606.18	Osbpl5	OSBPL5	-1.09	5.42	1.63481e-07	1.81016e-06	4.88	5.96	4.89	4.86	5.98	5.95
ENSMUSG00000078931.4	Pdf	PDF	1.68	4.64	1.68991e-07	1.84723e-06	5.48	3.8	5.63	5.33	3.87	3.72
ENSMUSG00000029249.15	Rest	REST	-1.37	7.17	1.63901e-07	1.81324e-06	6.48	7.86	6.38	6.59	7.81	7.91
ENSMUSG00000034271.16	Jdp2	JDP2	-1.45	3.72	1.8593e-07	1.94852e-06	3	4.45	3.01	2.98	4.49	4.39
ENSMUSG00000019917.10	2021-09-10	44449	1.08	6.73	1.61271e-07	1.79344e-06	7.27	6.19	7.27	7.27	6.15	6.22
ENSMUSG00000112640.1	Gm32687	GM32687	1.38	3.89	1.79405e-07	1.91196e-06	4.57	3.21	4.64	4.51	3.17	3.23
ENSMUSG00000031865.16	Dctn1	DCTN1	-1.21	6.25	1.62008e-07	1.79851e-06	5.64	6.85	5.57	5.71	6.81	6.89
ENSMUSG00000029209.15	Gnpda2	GNPDA2	1.09	5.23	1.62245e-07	1.79958e-06	5.78	4.69	5.76	5.79	4.65	4.72
ENSMUSG00000038543.13	BC028528	BC028528	2.26	1.88	2.00111e-07	2.02344e-06	3.01	0.76	3.11	2.9	0.65	0.85
ENSMUSG00000040464.15	Gtpbp10	GTPBP10	1.22	6.4	1.60888e-07	1.79142e-06	7.01	5.79	7.09	6.93	5.82	5.75
ENSMUSG00000019710.13	Mrpl24	MRPL24	1.14	6.19	1.60913e-07	1.79142e-06	6.75	5.62	6.81	6.7	5.58	5.65
ENSMUSG00000024145.6	Pigf	PIGF	1.46	4.18	1.76614e-07	1.89191e-06	4.91	3.46	5.02	4.81	3.49	3.42
ENSMUSG00000015290.15	Ubl4a	UBL4A	1.12	5.11	1.64647e-07	1.81385e-06	5.67	4.55	5.7	5.64	4.59	4.52
ENSMUSG00000020176.17	Grb10	GRB10	-2.56	1.83	1.97487e-07	2.00782e-06	0.56	3.11	0.34	0.76	3.06	3.16
ENSMUSG00000020644.9	Id2	ID2	-1.19	6.35	1.64664e-07	1.81385e-06	5.75	6.94	5.82	5.68	6.97	6.91
ENSMUSG00000001910.5	Nacc1	NACC1	-1.16	6.71	1.65017e-07	1.81462e-06	6.13	7.29	6.17	6.09	7.34	7.23
ENSMUSG00000071180.5	Smim15	SMIM15	1.29	6.95	1.65935e-07	1.82003e-06	7.6	6.31	7.7	7.5	6.33	6.29
ENSMUSG00000020393.16	Kremen1	KREMEN1	-1.65	4.34	1.82461e-07	1.92705e-06	3.51	5.17	3.35	3.67	5.11	5.22
ENSMUSG00000075270.11	Pde11a	PDE11A	3.97	0.09	1.25673e-07	1.65073e-06	2.08	-1.8	2.21	1.95	-2.06	-1.72
ENSMUSG00000029470.15	P2rx4	P2RX4	1.32	4.45	1.75477e-07	1.89191e-06	5.11	3.79	5.11	5.11	3.69	3.89
ENSMUSG00000040430.18	Pitpnc1	PITPNC1	-1.3	4.18	1.83637e-07	1.93151e-06	3.53	4.84	3.52	3.54	4.79	4.88
ENSMUSG00000036398.13	Ppp1r11	PPP1R11	1.14	5.72	1.64852e-07	1.81436e-06	6.29	5.15	6.36	6.23	5.18	5.13
ENSMUSG00000028447.11	Dctn3	DCTN3	1.29	5.95	1.65278e-07	1.81594e-06	6.59	5.3	6.69	6.49	5.26	5.34
ENSMUSG00000013663.7	Pten	PTEN	-1.09	7.21	1.69737e-07	1.85063e-06	6.67	7.75	6.65	6.69	7.75	7.76
ENSMUSG00000025810.9	Nrp1	NRP1	-1.2	6.62	1.6781e-07	1.83588e-06	6.02	7.22	5.99	6.05	7.3	7.15
ENSMUSG00000026078.10	Pdcl3	PDCL3	1.08	6.55	1.66596e-07	1.82415e-06	7.08	6.01	7.09	7.08	5.97	6.05
ENSMUSG00000030751.18	Psma1	PSMA1	1.1	7.49	1.71136e-07	1.8601e-06	8.04	6.95	8.02	8.06	6.96	6.93
ENSMUSG00000021131.14	Erh	ERH	1.25	8.35	1.76598e-07	1.89191e-06	8.98	7.72	9.05	8.9	7.72	7.73
ENSMUSG00000041261.9	Car8	CAR8	1.77	3.15	2.00013e-07	2.02344e-06	4.04	2.28	4.14	3.94	2.17	2.37
ENSMUSG00000014077.13	Chp1	CHP1	-1.34	6.27	1.69652e-07	1.85063e-06	5.61	6.94	5.49	5.72	6.94	6.94
ENSMUSG00000040433.16	Zbtb38	ZBTB38	-1.13	6.53	1.69318e-07	1.84922e-06	5.96	7.09	5.94	5.99	7.14	7.04
ENSMUSG00000022148.16	Fyb	FYB	2.3	3.33	2.00433e-07	2.02344e-06	4.49	2.19	4.7	4.28	2.19	2.17
ENSMUSG00000028864.7	Hgf	HGF	2.42	1.26	2.00756e-07	2.02351e-06	2.47	0.08	2.52	2.42	0.13	-0.03
ENSMUSG00000064302.13	Clasp1	CLASP1	-1.28	6.35	1.70629e-07	1.85721e-06	5.7	6.98	5.8	5.61	7.01	6.96
ENSMUSG00000047215.14	Rpl9	RPL9	1.97	11.07	1.97371e-07	2.00782e-06	12.05	10.09	12.26	11.84	10.04	10.13
ENSMUSG00000063410.8	Stk24	STK24	-1.25	6.67	1.72056e-07	1.86712e-06	6.04	7.29	5.96	6.13	7.25	7.34
ENSMUSG00000021951.6	Eef1akmt1	EEF1AKMT1	1.48	5.07	1.74855e-07	1.89035e-06	5.81	4.34	5.95	5.68	4.35	4.32
ENSMUSG00000020444.19	Guk1	GUK1	1.54	5.5	1.72123e-07	1.86712e-06	6.27	4.72	6.41	6.12	4.78	4.67
ENSMUSG00000094483.2	Purb	PURB	-1.1	7.42	1.76616e-07	1.89191e-06	6.87	7.97	6.86	6.87	8	7.94
ENSMUSG00000023723.17	Mrps23	MRPS23	1.03	5.76	1.70624e-07	1.85721e-06	6.28	5.25	6.28	6.27	5.23	5.26
ENSMUSG00000115423.2	AL731706.1	AL731706.1	1.58	4.33	1.85378e-07	1.94502e-06	5.12	3.54	5.26	4.99	3.57	3.51
ENSMUSG00000048537.16	Phldb1	PHLDB1	-1.27	6.02	1.74051e-07	1.88325e-06	5.38	6.65	5.48	5.28	6.67	6.64
ENSMUSG00000022178.11	Ajuba	AJUBA	-1.1	7.41	1.7752e-07	1.89833e-06	6.86	7.96	6.88	6.84	7.94	7.97
ENSMUSG00000020277.10	Pfkl	PFKL	-1.85	8.34	1.84345e-07	1.93623e-06	7.42	9.27	7.23	7.6	9.24	9.3
ENSMUSG00000003355.7	Fkbp11	FKBP11	1.88	4.05	1.92316e-07	1.9869e-06	4.99	3.1	5.17	4.81	3.12	3.09
ENSMUSG00000028247.2	Coq3	COQ3	1.38	4.67	1.81634e-07	1.92466e-06	5.36	3.99	5.47	5.25	3.98	3.99
ENSMUSG00000022957.20	Itsn1	ITSN1	-1.06	5.64	1.76275e-07	1.89191e-06	5.12	6.17	5.12	5.11	6.17	6.17
ENSMUSG00000032384.16	Csnk1g1	CSNK1G1	-1.07	5.55	1.76809e-07	1.89232e-06	5.02	6.08	5.03	5	6.08	6.08
ENSMUSG00000028657.14	Ppt1	PPT1	1.07	5.57	1.73466e-07	1.87851e-06	6.11	5.04	6.09	6.13	5.07	5
ENSMUSG00000026074.15	Map4k4	MAP4K4	-1.13	7.89	1.82164e-07	1.92647e-06	7.33	8.46	7.29	7.36	8.46	8.46
ENSMUSG00000006289.14	Osgep	OSGEP	1.08	5.29	1.75364e-07	1.89191e-06	5.83	4.74	5.86	5.8	4.72	4.77
ENSMUSG00000034931.15	Dhx8	DHX8	-1.14	5.25	1.7954e-07	1.91196e-06	4.69	5.82	4.73	4.64	5.8	5.84
ENSMUSG00000032410.13	Xrn1	XRN1	-1.14	5.28	1.79696e-07	1.91203e-06	4.71	5.85	4.67	4.75	5.82	5.88
ENSMUSG00000050556.9	Kcnb1	KCNB1	-4.14	0.52	1.34837e-07	1.68126e-06	-1.48	2.59	-1.23	-1.87	2.51	2.68
ENSMUSG00000034484.8	Snx2	SNX2	1.09	6.87	1.76282e-07	1.89191e-06	7.42	6.32	7.46	7.38	6.3	6.35
ENSMUSG00000009927.9	Rps25	RPS25	1.82	10.5	2.01312e-07	2.02653e-06	11.41	9.59	11.59	11.22	9.55	9.62
ENSMUSG00000005362.14	Crbn	CRBN	1.16	5.68	1.75365e-07	1.89191e-06	6.27	5.09	6.34	6.19	5.1	5.09
ENSMUSG00000072980.3	Oip5	OIP5	1.18	4.23	1.90793e-07	1.97915e-06	4.81	3.64	4.83	4.8	3.63	3.64
ENSMUSG00000018849.6	Wwc1	WWC1	-1.16	5.67	1.78988e-07	1.91196e-06	5.09	6.24	5.15	5.03	6.27	6.22
ENSMUSG00000029198.3	Grpel1	GRPEL1	1.35	7.41	1.80886e-07	1.9199e-06	8.08	6.73	8.19	7.97	6.77	6.69
ENSMUSG00000023791.16	Pigx	PIGX	1.66	5.91	1.76623e-07	1.89191e-06	6.74	5.08	6.92	6.56	5.05	5.12
ENSMUSG00000028394.9	Pole3	POLE3	1.06	6.34	1.76183e-07	1.89191e-06	6.88	5.81	6.9	6.85	5.84	5.78
ENSMUSG00000021681.8	Aggf1	AGGF1	-1.07	5.76	1.7952e-07	1.91196e-06	5.22	6.3	5.19	5.25	6.31	6.29
ENSMUSG00000051730.15	Mettl5	METTL5	1.28	4.06	1.95427e-07	2.00129e-06	4.7	3.42	4.75	4.64	3.43	3.42
ENSMUSG00000010205.11	Raver1	RAVER1	-1.31	5.46	1.82256e-07	1.92647e-06	4.81	6.11	4.89	4.72	6.17	6.05
ENSMUSG00000049807.16	Arhgap23	ARHGAP23	-1.41	4.94	1.87481e-07	1.95747e-06	4.24	5.65	4.37	4.11	5.63	5.67
ENSMUSG00000046572.10	Zfp518b	ZFP518B	-1.18	5.28	1.835e-07	1.93151e-06	4.69	5.88	4.7	4.68	5.94	5.81
ENSMUSG00000045962.16	Wnk1	WNK1	-1.36	6.49	1.80667e-07	1.91918e-06	5.81	7.17	5.93	5.7	7.22	7.13
ENSMUSG00000037440.8	Vnn1	VNN1	1.55	4.23	1.94998e-07	2.00129e-06	5	3.46	4.88	5.12	3.39	3.52
ENSMUSG00000061518.11	Cox5b	COX5B	1.16	7.5	1.84388e-07	1.93623e-06	8.09	6.92	8.15	8.02	6.92	6.93
ENSMUSG00000071477.10	Zfp777	ZFP777	-1.14	4.73	1.91773e-07	1.98289e-06	4.17	5.3	4.18	4.15	5.3	5.3
ENSMUSG00000040481.17	Bptf	BPTF	-1.52	6.65	1.83119e-07	1.93081e-06	5.89	7.42	6.04	5.75	7.45	7.38
ENSMUSG00000001440.5	Kpnb1	KPNB1	-1.24	9.11	1.97945e-07	2.00782e-06	8.5	9.73	8.46	8.53	9.76	9.7
ENSMUSG00000024668.8	Sdhaf2	SDHAF2	1.11	6.02	1.80127e-07	1.91503e-06	6.58	5.47	6.64	6.52	5.49	5.45
ENSMUSG00000033938.5	Ndufb7	NDUFB7	1.31	6.44	1.81297e-07	1.92267e-06	7.09	5.79	7.19	6.99	5.74	5.83
ENSMUSG00000027555.8	Car13	CAR13	1.59	3.14	2.17639e-07	2.08658e-06	3.93	2.35	4.01	3.85	2.37	2.31
ENSMUSG00000055041.8	Commd5	COMMD5	1.25	4.41	1.94574e-07	1.99895e-06	5.04	3.79	5.1	4.98	3.74	3.82
ENSMUSG00000052928.9	Ctif	CTIF	-1.51	3.14	2.22705e-07	2.10586e-06	2.38	3.9	2.38	2.39	3.88	3.91
ENSMUSG00000039958.17	Etfbkmt	ETFBKMT	1.35	4.4	1.96546e-07	2.00474e-06	5.08	3.73	5.17	4.98	3.7	3.74
ENSMUSG00000038503.15	Mesd	MESD	1.07	6.45	1.83379e-07	1.93151e-06	6.99	5.92	7.03	6.94	5.92	5.91
ENSMUSG00000040857.15	Erf	ERF	-1.05	6.81	1.86128e-07	1.94852e-06	6.29	7.34	6.3	6.28	7.35	7.33
ENSMUSG00000037692.14	Ahdc1	AHDC1	-1.57	5.03	1.94424e-07	1.99895e-06	4.24	5.81	4.39	4.09	5.74	5.89
ENSMUSG00000041308.6	Sntb2	SNTB2	-1.08	5.74	1.86697e-07	1.95246e-06	5.2	6.29	5.17	5.23	6.3	6.26
ENSMUSG00000038145.17	Snrk	SNRK	-1.15	5.55	1.88457e-07	1.96446e-06	4.97	6.12	4.91	5.03	6.1	6.14
ENSMUSG00000020472.14	Zkscan17	ZKSCAN17	-1.06	5.5	1.88889e-07	1.96736e-06	4.97	6.03	4.96	4.98	6.02	6.04
ENSMUSG00000025290.17	Rps24	RPS24	1.84	10.85	2.14456e-07	2.07664e-06	11.77	9.93	11.96	11.58	9.89	9.96
ENSMUSG00000028082.14	Sh3d19	SH3D19	-1.08	6.28	1.87125e-07	1.95535e-06	5.75	6.82	5.71	5.78	6.84	6.8
ENSMUSG00000026219.14	Trip12	TRIP12	-1.28	8.06	1.9625e-07	2.00474e-06	7.42	8.7	7.33	7.5	8.71	8.69
ENSMUSG00000072214.7	2021-09-05	44444	-1.65	2.77	2.32343e-07	2.16005e-06	1.96	3.6	1.96	1.94	3.62	3.57
ENSMUSG00000040767.10	Snrnp25	SNRNP25	1.81	4.32	2.02467e-07	2.02661e-06	5.23	3.42	5.41	5.05	3.43	3.41
ENSMUSG00000046756.10	Mrps7	MRPS7	1.14	6.45	1.88027e-07	1.96158e-06	7.02	5.88	7.09	6.95	5.9	5.86
ENSMUSG00000034707.7	Gns	GNS	-1.07	6.12	1.89709e-07	1.9738e-06	5.59	6.66	5.56	5.62	6.64	6.68
ENSMUSG00000041297.8	Cdk13	CDK13	-1.06	6.24	1.89815e-07	1.9738e-06	5.71	6.76	5.74	5.68	6.77	6.76
ENSMUSG00000096054.3	Syne1	SYNE1	-1.59	4.64	2.04778e-07	2.03911e-06	3.85	5.43	4.02	3.67	5.45	5.41
ENSMUSG00000022193.7	Psmb5	PSMB5	1.12	7.63	1.95343e-07	2.00129e-06	8.19	7.07	8.21	8.16	7.04	7.1
ENSMUSG00000059278.9	Naa38	NAA38	1.05	5.32	1.91402e-07	1.98289e-06	5.84	4.8	5.85	5.84	4.78	4.82
ENSMUSG00000037361.8	Sf3b6	SF3B6	1.53	6.7	1.91512e-07	1.98289e-06	7.47	5.94	7.63	7.31	5.92	5.96
ENSMUSG00000057497.8	Fam136a	FAM136A	1.17	6.42	1.90298e-07	1.97721e-06	7	5.83	7.08	6.92	5.85	5.81
ENSMUSG00000034203.8	Chchd4	CHCHD4	1.52	6.08	1.90468e-07	1.97738e-06	6.84	5.32	7	6.68	5.34	5.3
ENSMUSG00000037408.10	Cnnm4	CNNM4	-1.25	4.61	2.05605e-07	2.03911e-06	3.98	5.23	3.91	4.06	5.25	5.21
ENSMUSG00000029599.13	Ddx54	DDX54	-1.04	6.59	1.92633e-07	1.98858e-06	6.07	7.11	6.07	6.07	7.11	7.1
ENSMUSG00000000399.10	Ndufa9	NDUFA9	1.04	6.85	1.93166e-07	1.98955e-06	7.37	6.33	7.38	7.35	6.32	6.33
ENSMUSG00000002416.13	Ndufb2	NDUFB2	1.58	5.77	1.91769e-07	1.98289e-06	6.55	4.97	6.72	6.39	4.93	5.02
ENSMUSG00000036504.6	Phpt1	PHPT1	1.18	5.35	1.9288e-07	1.98952e-06	5.95	4.76	5.94	5.95	4.68	4.85
ENSMUSG00000038418.7	Egr1	EGR1	-1.45	4.54	2.0871e-07	2.04715e-06	3.82	5.27	3.95	3.68	5.24	5.29
ENSMUSG00000063415.12	Cyp26b1	CYP26B1	-2.3	1.88	2.40221e-07	2.19977e-06	0.75	3.04	0.86	0.61	2.97	3.09
ENSMUSG00000037499.9	Nenf	NENF	1.29	5.39	1.93547e-07	1.99159e-06	6.04	4.74	6.14	5.93	4.72	4.77
ENSMUSG00000047562.3	Mmp10	MMP10	2.82	0.63	2.06301e-07	2.03911e-06	2.05	-0.74	2.08	2.01	-0.69	-0.86
ENSMUSG00000009470.17	Tnpo1	TNPO1	-1.3	8.62	2.07271e-07	2.03978e-06	7.96	9.27	7.88	8.05	9.27	9.27
ENSMUSG00000045160.14	Bola3	BOLA3	1.57	4.21	2.11276e-07	2.05673e-06	5	3.43	5.13	4.87	3.39	3.47
ENSMUSG00000020422.13	Tns3	TNS3	-1.11	6.82	1.96151e-07	2.00474e-06	6.26	7.37	6.31	6.21	7.36	7.38
ENSMUSG00000021262.15	Evl	EVL	-1.11	5.19	2.00296e-07	2.02344e-06	4.63	5.74	4.6	4.67	5.72	5.76
ENSMUSG00000029199.11	Lias	LIAS	1.08	5.67	1.93193e-07	1.98955e-06	6.21	5.12	6.15	6.26	5.12	5.13
ENSMUSG00000027166.14	Dnajc24	DNAJC24	1.46	3.74	2.21113e-07	2.1014e-06	4.46	3.01	4.56	4.37	3	3.02
ENSMUSG00000030199.16	Etv6	ETV6	-1.18	4.8	2.06025e-07	2.03911e-06	4.21	5.39	4.22	4.2	5.44	5.34
ENSMUSG00000019843.14	Fyn	FYN	-1.17	4.76	2.06473e-07	2.03911e-06	4.18	5.35	4.13	4.23	5.33	5.36
ENSMUSG00000039116.7	Adgrg6	ADGRG6	-1.35	3.93	2.21985e-07	2.10344e-06	3.26	4.61	3.19	3.32	4.58	4.62
ENSMUSG00000031834.15	Pik3r2	PIK3R2	-1.09	6.91	1.97365e-07	2.00782e-06	6.37	7.46	6.4	6.33	7.43	7.49
ENSMUSG00000024991.8	Eif3a	EIF3A	-1.16	8.55	2.08889e-07	2.04715e-06	7.97	9.13	8	7.94	9.12	9.14
ENSMUSG00000021140.9	Pcnx	PCNX	-1.26	4.7	2.08537e-07	2.04715e-06	4.07	5.33	4.15	3.98	5.31	5.35
ENSMUSG00000075595.9	Zfp652	ZFP652	-1.27	5.23	2.02135e-07	2.02661e-06	4.6	5.87	4.7	4.49	5.87	5.87
ENSMUSG00000045039.9	Megf8	MEGF8	-1.4	6.29	1.97503e-07	2.00782e-06	5.59	6.99	5.72	5.46	6.97	7.01
ENSMUSG00000022354.4	Ndufb9	NDUFB9	1.57	7.01	1.9786e-07	2.00782e-06	7.8	6.21	7.96	7.63	6.16	6.27
ENSMUSG00000026116.11	Tmem131	TMEM131	-1.31	5.06	2.04279e-07	2.03659e-06	4.41	5.71	4.51	4.31	5.75	5.68
ENSMUSG00000023892.8	Zfp51	ZFP51	1.18	4.93	2.00667e-07	2.02351e-06	5.52	4.34	5.59	5.45	4.35	4.32
ENSMUSG00000062328.8	Rpl17	RPL17	1.89	10.57	2.24481e-07	2.11458e-06	11.52	9.62	11.71	11.32	9.55	9.69
ENSMUSG00000048264.16	Dip2c	DIP2C	-1.31	4.96	2.05936e-07	2.03911e-06	4.3	5.61	4.41	4.2	5.63	5.59
ENSMUSG00000062006.12	Rpl34	RPL34	1.78	9.64	2.18348e-07	2.09063e-06	10.54	8.75	10.72	10.35	8.69	8.81
ENSMUSG00000025351.14	Cd63	CD63	1.33	8.63	2.10271e-07	2.05386e-06	9.3	7.97	9.37	9.23	7.9	8.04
ENSMUSG00000022338.8	Eny2	ENY2	1.32	6.38	1.95673e-07	2.00221e-06	7.04	5.72	7.16	6.92	5.73	5.71
ENSMUSG00000022551.8	Cyc1	CYC1	1.1	7.32	2.00394e-07	2.02344e-06	7.87	6.77	7.92	7.82	6.78	6.76
ENSMUSG00000035725.13	Prkx	PRKX	-1.33	4.54	2.12871e-07	2.06598e-06	3.88	5.21	3.82	3.93	5.28	5.14
ENSMUSG00000024642.17	Tle4	TLE4	-1.14	4.75	2.09015e-07	2.04715e-06	4.18	5.32	4.21	4.15	5.33	5.31
ENSMUSG00000023852.14	Chd1	CHD1	-1.18	6.66	1.98862e-07	2.01552e-06	6.07	7.25	6.14	6.01	7.3	7.21
ENSMUSG00000022450.6	Ndufa6	NDUFA6	1.2	6.39	1.96443e-07	2.00474e-06	6.99	5.79	7.07	6.91	5.75	5.83
ENSMUSG00000060636.14	Rpl35a	RPL35A	1.64	9.89	2.21762e-07	2.10344e-06	10.71	9.06	10.86	10.56	9.01	9.12
ENSMUSG00000033813.15	Tcea1	TCEA1	1.31	8.01	2.06759e-07	2.03911e-06	8.66	7.36	8.77	8.56	7.37	7.34
ENSMUSG00000024687.11	Osbp	OSBP	-1.15	5.49	2.02487e-07	2.02661e-06	4.92	6.06	4.85	4.97	6.03	6.08
ENSMUSG00000008540.11	Mgst1	MGST1	4.59	-0.06	1.37275e-07	1.68613e-06	2.25	-2.22	2.43	2.05	-2.23	-2.48
ENSMUSG00000072762.9	4930522L14Rik	4930522L14RIK	1.78	3.54	2.31582e-07	2.1561e-06	4.44	2.66	4.58	4.29	2.6	2.71
ENSMUSG00000022978.11	Mis18a	MIS18A	1.16	5.02	2.03255e-07	2.02954e-06	5.6	4.45	5.67	5.53	4.44	4.45
ENSMUSG00000068329.12	Htra2	HTRA2	1.06	5.95	1.97874e-07	2.00782e-06	6.48	5.42	6.46	6.5	5.47	5.38
ENSMUSG00000042129.8	Rassf4	RASSF4	2.07	2.33	2.51919e-07	2.2648e-06	3.37	1.31	3.35	3.38	1.11	1.49
ENSMUSG00000006134.4	Crkl	CRKL	-1.23	6.04	2.0153e-07	2.02653e-06	5.42	6.66	5.33	5.52	6.67	6.65
ENSMUSG00000007777.9	0610009B22Rik	0610009B22RIK	1.38	4.28	2.16104e-07	2.08315e-06	4.97	3.59	5.06	4.89	3.66	3.52
ENSMUSG00000089774.2	Slc5a3	SLC5A3	-1.07	5.87	2.01918e-07	2.02661e-06	5.34	6.41	5.33	5.34	6.45	6.37
ENSMUSG00000043733.14	Ptpn11	PTPN11	-1.14	7.84	2.09174e-07	2.04715e-06	7.28	8.41	7.24	7.31	8.44	8.39
ENSMUSG00000040269.5	Mrps28	MRPS28	1.27	4.5	2.12635e-07	2.06525e-06	5.13	3.87	5.22	5.05	3.86	3.88
ENSMUSG00000032419.8	Tbx18	TBX18	-1.13	4.9	2.10713e-07	2.05423e-06	4.33	5.46	4.29	4.37	5.47	5.45
ENSMUSG00000025630.8	Hprt	HPRT	1.25	7.55	2.06646e-07	2.03911e-06	8.18	6.93	8.28	8.08	6.94	6.92
ENSMUSG00000032289.15	Thsd4	THSD4	-2.06	2.69	2.53688e-07	2.27114e-06	1.67	3.73	1.75	1.57	3.62	3.83
ENSMUSG00000032601.13	Prkar2a	PRKAR2A	-1.09	5.89	2.032e-07	2.02954e-06	5.34	6.43	5.31	5.38	6.46	6.4
ENSMUSG00000014075.15	Tctex1d2	TCTEX1D2	1.57	3.24	2.41175e-07	2.20534e-06	4.03	2.46	4.12	3.93	2.44	2.47
ENSMUSG00000031878.18	Nae1	NAE1	1.19	6.13	2.01435e-07	2.02653e-06	6.73	5.54	6.82	6.63	5.55	5.52
ENSMUSG00000027801.7	Tm4sf4	TM4SF4	1.07	5.59	2.01968e-07	2.02661e-06	6.13	5.05	6.18	6.08	5.04	5.07
ENSMUSG00000027878.11	Notch2	NOTCH2	-1.43	6.89	2.06478e-07	2.03911e-06	6.17	7.61	6.31	6.04	7.63	7.58
ENSMUSG00000022769.9	Sdf2l1	SDF2L1	1.24	5.27	2.05876e-07	2.03911e-06	5.89	4.65	5.98	5.8	4.68	4.61
ENSMUSG00000007670.10	Khsrp	KHSRP	-1.24	6.91	2.07008e-07	2.03978e-06	6.29	7.53	6.38	6.2	7.55	7.5
ENSMUSG00000028165.9	Cisd2	CISD2	1.21	6.46	2.0383e-07	2.03369e-06	7.07	5.86	7.16	6.98	5.82	5.9
ENSMUSG00000027406.12	Idh3b	IDH3B	1.05	7.14	2.0739e-07	2.03978e-06	7.66	6.62	7.65	7.68	6.61	6.62
ENSMUSG00000027189.16	Trim44	TRIM44	-1.1	6.87	2.0676e-07	2.03911e-06	6.32	7.42	6.37	6.27	7.4	7.43
ENSMUSG00000027285.13	Haus2	HAUS2	1.06	5.77	2.029e-07	2.02916e-06	6.29	5.24	6.34	6.25	5.24	5.24
ENSMUSG00000022323.11	Rida	RIDA	1.16	4.51	2.16629e-07	2.08449e-06	5.09	3.93	5.09	5.09	3.87	3.98
ENSMUSG00000078919.10	Dpm1	DPM1	1.22	4.34	2.19912e-07	2.09363e-06	4.95	3.73	5	4.89	3.74	3.71
ENSMUSG00000021730.8	Hcn1	HCN1	-1.75	2.88	2.55347e-07	2.28121e-06	2.01	3.75	2.13	1.87	3.74	3.76
ENSMUSG00000030499.9	Kctd15	KCTD15	-1.24	4.48	2.22784e-07	2.10586e-06	3.87	5.11	3.81	3.92	5.07	5.14
ENSMUSG00000030663.12	1110004F10Rik	1110004F10RIK	1.11	7.37	2.10327e-07	2.05386e-06	7.92	6.81	7.97	7.88	6.84	6.79
ENSMUSG00000053553.11	3110082I17Rik	3110082I17RIK	1.02	5.49	2.05437e-07	2.03911e-06	6	4.99	5.99	6.01	4.98	4.99
ENSMUSG00000051234.6	Rnf7	RNF7	1.41	7	2.08328e-07	2.04669e-06	7.7	6.29	7.84	7.56	6.28	6.31
ENSMUSG00000072694.8	1500011B03Rik	1500011B03RIK	1.26	4.45	2.1922e-07	2.09363e-06	5.08	3.82	5.15	5.01	3.78	3.86
ENSMUSG00000033543.17	Gtf2a2	GTF2A2	1.62	5.76	2.06024e-07	2.03911e-06	6.58	4.96	6.75	6.39	4.99	4.92
ENSMUSG00000043019.12	Edem3	EDEM3	-1.36	5.28	2.13346e-07	2.06818e-06	4.6	5.96	4.47	4.73	5.96	5.95
ENSMUSG00000021319.7	Sfrp4	SFRP4	1.79	3.86	2.33713e-07	2.16807e-06	4.76	2.97	4.92	4.6	3	2.94
ENSMUSG00000006498.16	Ptbp1	PTBP1	-1.14	8.28	2.19878e-07	2.09363e-06	7.7	8.85	7.69	7.72	8.88	8.81
ENSMUSG00000040822.7	1700123O20Rik	1700123O20RIK	1.16	5.64	2.06735e-07	2.03911e-06	6.22	5.06	6.3	6.14	5.09	5.04
ENSMUSG00000027519.10	Rab22a	RAB22A	-1.04	5.64	2.10449e-07	2.05386e-06	5.12	6.17	5.11	5.13	6.18	6.15
ENSMUSG00000028042.15	Zbtb7b	ZBTB7B	-1.07	5.63	2.10859e-07	2.05423e-06	5.09	6.17	5.07	5.11	6.13	6.2
ENSMUSG00000035674.13	Ndufa3	NDUFA3	1.13	5.58	2.07464e-07	2.03978e-06	6.14	5.02	6.21	6.07	5.02	5
ENSMUSG00000036990.13	Otud4	OTUD4	-1.31	8.06	2.1952e-07	2.09363e-06	7.41	8.7	7.45	7.35	8.8	8.61
ENSMUSG00000030614.8	Tmem126b	TMEM126B	1.09	4.95	2.1342e-07	2.06818e-06	5.5	4.41	5.54	5.46	4.42	4.39
ENSMUSG00000102748.1	Pcdhgb2	PCDHGB2	-1.47	4.02	2.3699e-07	2.18734e-06	3.29	4.76	3.16	3.41	4.73	4.78
ENSMUSG00000062931.15	Zfp938	ZFP938	1.35	3.75	2.37104e-07	2.18734e-06	4.43	3.08	4.49	4.36	3.06	3.09
ENSMUSG00000014426.9	Map3k4	MAP3K4	-1.12	5.61	2.12277e-07	2.06491e-06	5.05	6.17	5	5.1	6.14	6.2
ENSMUSG00000015536.14	Mocs2	MOCS2	1.17	4.77	2.16815e-07	2.08449e-06	5.36	4.19	5.42	5.3	4.21	4.15
ENSMUSG00000093904.2	Tomm20	TOMM20	1.61	9.33	2.3075e-07	2.15305e-06	10.14	8.52	10.3	9.97	8.52	8.53
ENSMUSG00000032571.14	Pik3r4	PIK3R4	-1.1	5.07	2.1757e-07	2.08658e-06	4.52	5.62	4.52	4.52	5.59	5.66
ENSMUSG00000026872.18	Zeb2	ZEB2	-1.22	4.63	2.25296e-07	2.11914e-06	4.03	5.24	4.06	3.98	5.29	5.19
ENSMUSG00000005161.15	Prdx2	PRDX2	1.35	9.56	2.33985e-07	2.16901e-06	10.23	8.88	10.31	10.16	8.83	8.94
ENSMUSG00000039953.13	Clstn1	CLSTN1	-1.32	7.05	2.14652e-07	2.07697e-06	6.39	7.71	6.28	6.5	7.7	7.72
ENSMUSG00000002274.13	Metrn	METRN	1.16	4.27	2.27805e-07	2.13334e-06	4.85	3.69	4.86	4.83	3.67	3.71
ENSMUSG00000027673.12	Ndufb5	NDUFB5	1.06	6.32	2.105e-07	2.05386e-06	6.85	5.79	6.89	6.81	5.77	5.81
ENSMUSG00000024208.16	Uqcc2	UQCC2	1.83	6.56	2.12477e-07	2.06525e-06	7.47	5.64	7.7	7.25	5.62	5.67
ENSMUSG00000035227.7	Spcs2	SPCS2	1.05	7.36	2.16894e-07	2.08449e-06	7.88	6.82	7.9	7.87	6.84	6.81
ENSMUSG00000024743.16	Syt7	SYT7	-1.2	5.2	2.19637e-07	2.09363e-06	4.6	5.8	4.53	4.67	5.76	5.85
ENSMUSG00000063873.10	Slc24a3	SLC24A3	-1.62	2.88	2.64738e-07	2.32139e-06	2.08	3.68	2.13	2	3.67	3.7
ENSMUSG00000014355.10	Anapc1	ANAPC1	-1.09	7.78	2.21548e-07	2.10344e-06	7.25	8.33	7.24	7.24	8.35	8.31
ENSMUSG00000000631.20	Myo18a	MYO18A	-1.19	5.91	2.15324e-07	2.07956e-06	5.32	6.5	5.4	5.24	6.52	6.49
ENSMUSG00000038740.9	Mvb12b	MVB12B	-1.29	3.91	2.43569e-07	2.2189e-06	3.26	4.55	3.26	3.26	4.59	4.52
ENSMUSG00000025402.12	Nab2	NAB2	-1.1	5.74	2.16513e-07	2.08449e-06	5.19	6.29	5.14	5.24	6.27	6.31
ENSMUSG00000026918.16	Brd3	BRD3	-1.04	6.08	2.15569e-07	2.07956e-06	5.56	6.61	5.59	5.53	6.62	6.59
ENSMUSG00000020802.8	Ube2o	UBE2O	-1.18	5.79	2.1716e-07	2.08548e-06	5.2	6.38	5.28	5.11	6.39	6.37
ENSMUSG00000028763.18	Hspg2	HSPG2	-2.13	8.03	2.27444e-07	2.13157e-06	6.97	9.1	7.21	6.73	9.07	9.13
ENSMUSG00000026820.5	Ptges2	PTGES2	1.13	4.7	2.24173e-07	2.11323e-06	5.26	4.13	5.3	5.22	4.16	4.11
ENSMUSG00000022546.5	Gpt	GPT	1.96	2.69	2.68639e-07	2.34167e-06	3.67	1.73	3.78	3.55	1.59	1.84
ENSMUSG00000042389.13	Tsen2	TSEN2	1.29	4.27	2.33403e-07	2.16807e-06	4.91	3.62	4.99	4.83	3.61	3.64
ENSMUSG00000003865.16	Gys1	GYS1	-1.56	6.64	2.19135e-07	2.09363e-06	5.86	7.42	5.71	6.01	7.34	7.5
ENSMUSG00000059734.7	Ndufs8	NDUFS8	1.03	6.25	2.15073e-07	2.07947e-06	6.76	5.73	6.78	6.74	5.71	5.76
ENSMUSG00000030770.15	Parva	PARVA	-1.29	6.06	2.18815e-07	2.09353e-06	5.42	6.71	5.3	5.53	6.72	6.7
ENSMUSG00000036046.14	5031439G07Rik	5031439G07RIK	-1.08	6.23	2.17763e-07	2.08658e-06	5.69	6.77	5.65	5.73	6.8	6.74
ENSMUSG00000016024.9	Lbp	LBP	4.15	0.43	2.02468e-07	2.02661e-06	2.5	-1.55	2.35	2.65	-2.01	-1.27
ENSMUSG00000045216.7	Hs6st1	HS6ST1	-1.22	5.27	2.23902e-07	2.11323e-06	4.65	5.88	4.56	4.75	5.88	5.87
ENSMUSG00000040249.15	Lrp1	LRP1	-1.82	7.55	2.25732e-07	2.12073e-06	6.64	8.46	6.84	6.44	8.44	8.47
ENSMUSG00000007038.5	Neu1	NEU1	1.09	5.96	2.15562e-07	2.07956e-06	6.51	5.42	6.53	6.49	5.36	5.48
ENSMUSG00000021707.5	Dhfr	DHFR	1.13	5.12	2.20662e-07	2.09866e-06	5.69	4.55	5.74	5.63	4.59	4.52
ENSMUSG00000049470.13	Aff4	AFF4	-1.08	7.75	2.27078e-07	2.13121e-06	7.21	8.29	7.19	7.23	8.29	8.28
ENSMUSG00000022837.14	Iqcb1	IQCB1	1.17	4.68	2.28142e-07	2.13493e-06	5.27	4.1	5.32	5.21	4.06	4.13
ENSMUSG00000001025.8	S100a6	S100A6	1.47	10.6	2.51773e-07	2.2648e-06	11.34	9.87	11.44	11.24	9.83	9.9
ENSMUSG00000079427.10	Mthfsl	MTHFSL	1.46	3.69	2.50942e-07	2.2648e-06	4.42	2.96	4.52	4.33	2.93	2.99
ENSMUSG00000046230.11	Vps13a	VPS13A	-1.03	5.85	2.22573e-07	2.10586e-06	5.34	6.37	5.33	5.35	6.38	6.35
ENSMUSG00000025413.13	Ttc4	TTC4	1.01	5.68	2.19969e-07	2.09363e-06	6.19	5.18	6.19	6.18	5.16	5.2
ENSMUSG00000026154.4	Sdhaf4	SDHAF4	1.55	4.16	2.42909e-07	2.21488e-06	4.94	3.39	5.07	4.8	3.38	3.39
ENSMUSG00000022817.15	Itgb5	ITGB5	-1.43	7.24	2.27449e-07	2.13157e-06	6.53	7.96	6.39	6.66	7.94	7.97
ENSMUSG00000041763.14	Tpp2	TPP2	-1.05	6.84	2.25158e-07	2.11914e-06	6.31	7.36	6.32	6.31	7.39	7.33
ENSMUSG00000089847.8	Timm10b	TIMM10B	1.38	6.01	2.21904e-07	2.10344e-06	6.7	5.32	6.84	6.56	5.32	5.32
ENSMUSG00000018585.9	Atox1	ATOX1	1.28	6.15	2.22898e-07	2.10586e-06	6.8	5.51	6.91	6.68	5.47	5.55
ENSMUSG00000021930.14	Spryd7	SPRYD7	1.49	4.94	2.31577e-07	2.1561e-06	5.69	4.2	5.82	5.56	4.28	4.11
ENSMUSG00000027288.16	Zfp106	ZFP106	-1.17	7.75	2.34494e-07	2.17216e-06	7.17	8.34	7.13	7.21	8.4	8.28
ENSMUSG00000058748.9	Zfp958	ZFP958	1.44	4.94	2.32063e-07	2.15901e-06	5.66	4.22	5.79	5.53	4.18	4.26
ENSMUSG00000018474.17	Chd3	CHD3	-1.49	6.71	2.30059e-07	2.14974e-06	5.96	7.46	6.12	5.81	7.45	7.46
ENSMUSG00000026999.14	Nup35	NUP35	1.07	5.7	2.25796e-07	2.12073e-06	6.23	5.17	6.27	6.2	5.21	5.12
ENSMUSG00000020532.18	Acaca	ACACA	-1.13	6.82	2.29919e-07	2.14974e-06	6.26	7.39	6.3	6.22	7.45	7.33
ENSMUSG00000069743.5	Zfp820	ZFP820	1.36	3.57	2.63228e-07	2.31755e-06	4.26	2.9	4.32	4.19	2.89	2.9
ENSMUSG00000032504.15	Pdcd6ip	PDCD6IP	-1.06	7.04	2.31381e-07	2.1561e-06	6.51	7.56	6.48	6.54	7.55	7.57
ENSMUSG00000039741.15	Bahcc1	BAHCC1	-1.54	5.1	2.39525e-07	2.19789e-06	4.34	5.88	4.51	4.16	5.86	5.88
ENSMUSG00000038855.10	Itpkb	ITPKB	-1.36	3.8	2.63819e-07	2.31755e-06	3.12	4.48	3.07	3.18	4.44	4.52
ENSMUSG00000021501.4	Caml	CAML	1.26	4.92	2.35321e-07	2.17825e-06	5.55	4.29	5.65	5.45	4.3	4.27
ENSMUSG00000020821.17	Kif1c	KIF1C	-1.07	7.57	2.37892e-07	2.18782e-06	7.04	8.11	7.04	7.03	8.08	8.14
ENSMUSG00000030847.8	Bag3	BAG3	-1.19	4.4	2.51791e-07	2.2648e-06	3.81	4.99	3.84	3.77	5.01	4.97
ENSMUSG00000037487.7	Ubr5	UBR5	-1.57	7.55	2.39845e-07	2.19789e-06	6.77	8.34	6.93	6.61	8.35	8.32
ENSMUSG00000040331.16	Nsmce4a	NSMCE4A	1	6.29	2.30666e-07	2.15305e-06	6.79	5.79	6.8	6.77	5.78	5.8
ENSMUSG00000029463.5	Fam216a	FAM216A	1.09	6.77	2.33667e-07	2.16807e-06	7.31	6.22	7.36	7.25	6.2	6.25
ENSMUSG00000021431.15	Snrnp48	SNRNP48	1.67	5.23	2.36994e-07	2.18734e-06	6.06	4.39	6.24	5.89	4.45	4.33
ENSMUSG00000041037.8	Irgq	IRGQ	-1.34	5.02	2.45769e-07	2.2346e-06	4.35	5.7	4.47	4.22	5.68	5.71
ENSMUSG00000028293.14	Slc35a1	SLC35A1	1.18	5.12	2.37829e-07	2.18782e-06	5.71	4.53	5.78	5.64	4.58	4.48
ENSMUSG00000025246.13	Tbl1x	TBL1X	-1.02	6.76	2.37205e-07	2.18734e-06	6.25	7.28	6.24	6.26	7.29	7.26
ENSMUSG00000030123.15	Plxnd1	PLXND1	-1.32	4.44	2.58685e-07	2.29638e-06	3.78	5.1	3.88	3.68	5.07	5.13
ENSMUSG00000023088.17	Abcc1	ABCC1	-1.15	6.92	2.39709e-07	2.19789e-06	6.34	7.49	6.39	6.29	7.55	7.43
ENSMUSG00000078870.9	Gm14410	GM14410	1.28	4.49	2.51491e-07	2.2648e-06	5.13	3.86	5.22	5.04	3.86	3.84
ENSMUSG00000026494.12	Kif26b	KIF26B	-1.6	5.18	2.48602e-07	2.25395e-06	4.38	5.97	4.56	4.2	5.93	6.02
ENSMUSG00000054611.17	Kdm2a	KDM2A	-1.21	6.73	2.39554e-07	2.19789e-06	6.13	7.34	6.22	6.04	7.36	7.32
ENSMUSG00000068798.10	Rap1a	RAP1A	1.02	6.24	2.36602e-07	2.18734e-06	6.75	5.73	6.78	6.72	5.72	5.74
ENSMUSG00000034485.10	Uaca	UACA	-1.17	4.92	2.50766e-07	2.2648e-06	4.33	5.5	4.27	4.39	5.47	5.54
ENSMUSG00000034932.4	Mrpl54	MRPL54	1.31	6.18	2.37499e-07	2.18734e-06	6.84	5.53	6.96	6.71	5.53	5.53
ENSMUSG00000059182.7	Skap2	SKAP2	1.06	5.05	2.43696e-07	2.2189e-06	5.58	4.53	5.62	5.55	4.5	4.54
ENSMUSG00000002767.13	Mrpl2	MRPL2	1.01	5.86	2.37441e-07	2.18734e-06	6.36	5.36	6.37	6.35	5.33	5.38
ENSMUSG00000075225.14	Ccdc162	CCDC162	2.6	0.89	2.85292e-07	2.43496e-06	2.19	-0.38	2.23	2.15	-0.55	-0.28
ENSMUSG00000078495.10	Zfp984	ZFP984	1.08	5.35	2.41537e-07	2.20709e-06	5.89	4.81	5.95	5.84	4.82	4.8
ENSMUSG00000020857.11	Nme2	NME2	1.76	9.6	2.68696e-07	2.34167e-06	10.48	8.71	10.68	10.28	8.7	8.73
ENSMUSG00000051147.10	Nat2	NAT2	1.34	3.88	2.707e-07	2.35274e-06	4.55	3.22	4.64	4.47	3.21	3.22
ENSMUSG00000030045.10	Mrpl19	MRPL19	1.08	6.07	2.39061e-07	2.197e-06	6.61	5.53	6.66	6.55	5.56	5.5
ENSMUSG00000061315.14	Naca	NACA	1.42	9.75	2.70427e-07	2.35196e-06	10.46	9.04	10.57	10.34	9.03	9.05
ENSMUSG00000033335.17	Dnm2	DNM2	-1.01	5.98	2.42728e-07	2.21481e-06	5.48	6.49	5.47	5.49	6.49	6.48
ENSMUSG00000044573.16	Acp1	ACP1	1.03	7.2	2.4549e-07	2.23365e-06	7.71	6.69	7.73	7.7	6.7	6.67
ENSMUSG00000024516.13	Sec11c	SEC11C	1.75	3.83	2.74266e-07	2.36448e-06	4.71	2.96	4.87	4.55	3.01	2.9
ENSMUSG00000002825.8	Qtrt1	QTRT1	1.04	4.91	2.48028e-07	2.25035e-06	5.42	4.39	5.43	5.42	4.39	4.38
ENSMUSG00000039196.2	Orm1	ORM1	4.95	-0.43	1.38325e-07	1.68702e-06	2.04	-2.7	2	2.07	-3.39	-2.4
ENSMUSG00000021022.9	Ppp2r3c	PPP2R3C	1.15	5.84	2.41031e-07	2.20534e-06	6.42	5.27	6.5	6.33	5.26	5.28
ENSMUSG00000021027.17	Ralgapa1	RALGAPA1	-1.09	5.14	2.51771e-07	2.2648e-06	4.59	5.68	4.62	4.56	5.71	5.65
ENSMUSG00000022191.16	Drosha	DROSHA	-1.05	5.57	2.47195e-07	2.24438e-06	5.04	6.1	5.01	5.08	6.11	6.09
ENSMUSG00000031812.16	Map1lc3b	MAP1LC3B	1.1	7.74	2.52119e-07	2.26501e-06	8.29	7.2	8.33	8.26	7.16	7.23
ENSMUSG00000034994.10	Eef2	EEF2	-1.55	11.42	2.88236e-07	2.44705e-06	10.64	12.19	10.53	10.75	12.15	12.23
ENSMUSG00000036550.16	Cnot1	CNOT1	-1.21	7.98	2.56571e-07	2.28552e-06	7.38	8.59	7.3	7.45	8.6	8.58
ENSMUSG00000020902.12	Ntn1	NTN1	-1.46	4.21	2.73509e-07	2.36131e-06	3.48	4.94	3.36	3.59	4.88	5
ENSMUSG00000034687.8	Fras1	FRAS1	-2.13	3.2	3.02949e-07	2.52018e-06	2.14	4.26	2.41	1.86	4.23	4.29
ENSMUSG00000016933.17	Plcg1	PLCG1	-1.13	7.2	2.49625e-07	2.26004e-06	6.63	7.76	6.7	6.57	7.76	7.77
ENSMUSG00000047045.17	Tmem164	TMEM164	-1.13	6.36	2.46496e-07	2.23961e-06	5.8	6.93	5.73	5.86	6.9	6.96
ENSMUSG00000033228.8	Scaf11	SCAF11	-1.1	7.58	2.54343e-07	2.27383e-06	7.03	8.12	6.98	7.08	8.13	8.12
ENSMUSG00000038970.7	Lmtk2	LMTK2	-1.25	5.4	2.52562e-07	2.26581e-06	4.78	6.02	4.88	4.67	6.03	6.01
ENSMUSG00000117975.1	Itprip	ITPRIP	-1.06	5.51	2.50369e-07	2.2648e-06	4.97	6.04	4.95	5	6.07	6
ENSMUSG00000022353.10	Mtss1	MTSS1	-1.21	5.04	2.569e-07	2.28552e-06	4.44	5.64	4.38	4.49	5.58	5.7
ENSMUSG00000038252.13	Ncapd2	NCAPD2	-1.07	7.31	2.5336e-07	2.27066e-06	6.78	7.86	6.74	6.82	7.86	7.85
ENSMUSG00000016262.14	Sertad4	SERTAD4	-1.11	4.76	2.62304e-07	2.31334e-06	4.21	5.32	4.19	4.21	5.29	5.35
ENSMUSG00000019763.11	Rmnd1	RMND1	1.18	4.81	2.56301e-07	2.28552e-06	5.41	4.22	5.48	5.32	4.2	4.24
ENSMUSG00000021832.8	Psmc6	PSMC6	1.16	7.98	2.59644e-07	2.29778e-06	8.57	7.4	8.64	8.49	7.39	7.41
ENSMUSG00000070695.4	Cntnap5a	CNTNAP5A	1.45	3.44	2.92624e-07	2.47086e-06	4.17	2.73	4.14	4.18	2.62	2.82
ENSMUSG00000032314.14	Etfa	ETFA	1.12	6.54	2.49271e-07	2.25842e-06	7.11	5.98	7.07	7.14	5.92	6.05
ENSMUSG00000042700.16	Sipa1l1	SIPA1L1	-1.07	5.74	2.5232e-07	2.26522e-06	5.21	6.28	5.24	5.18	6.32	6.24
ENSMUSG00000014177.10	Tvp23b	TVP23B	1.25	4.96	2.56018e-07	2.28552e-06	5.58	4.34	5.67	5.49	4.3	4.37
ENSMUSG00000031592.10	Pcm1	PCM1	-1.01	6.7	2.51717e-07	2.2648e-06	6.2	7.21	6.21	6.18	7.21	7.2
ENSMUSG00000022674.15	Ube2v2	UBE2V2	1.4	6.66	2.50982e-07	2.2648e-06	7.37	5.96	7.51	7.22	5.97	5.96
ENSMUSG00000037266.18	Rsrp1	RSRP1	1.89	7.49	2.58864e-07	2.29638e-06	8.44	6.55	8.68	8.2	6.52	6.58
ENSMUSG00000040549.16	Ckap5	CKAP5	-1.2	7.38	2.59197e-07	2.29638e-06	6.79	7.98	6.7	6.87	8.01	7.95
ENSMUSG00000026436.15	Elk4	ELK4	-1.16	5.3	2.59713e-07	2.29778e-06	4.72	5.88	4.8	4.64	5.89	5.88
ENSMUSG00000010406.12	Mrpl52	MRPL52	1.34	5.45	2.53457e-07	2.27066e-06	6.12	4.78	6.24	6	4.72	4.82
ENSMUSG00000079737.4	3110001I22Rik	3110001I22RIK	1.5	3.52	2.94917e-07	2.48565e-06	4.28	2.77	4.36	4.19	2.84	2.69
ENSMUSG00000047710.8	Champ1	CHAMP1	-1.1	5.7	2.56886e-07	2.28552e-06	5.14	6.25	5.08	5.21	6.26	6.24
ENSMUSG00000020457.13	Drg1	DRG1	1.13	7.67	2.62375e-07	2.31334e-06	8.23	7.11	8.3	8.17	7.1	7.11
ENSMUSG00000021018.8	Polr2h	POLR2H	1.17	6.21	2.54232e-07	2.27383e-06	6.8	5.63	6.89	6.71	5.63	5.64
ENSMUSG00000023755.10	Rhebl1	RHEBL1	1.61	2.87	3.1795e-07	2.59609e-06	3.68	2.07	3.77	3.59	2.03	2.1
ENSMUSG00000038215.15	Cep44	CEP44	1.12	4.93	2.63771e-07	2.31755e-06	5.5	4.37	5.55	5.44	4.33	4.41
ENSMUSG00000021996.16	Esd	ESD	1.2	8.32	2.72384e-07	2.35588e-06	8.91	7.72	8.98	8.85	7.76	7.68
ENSMUSG00000016028.10	Celsr1	CELSR1	-3.1	2.09	3.2979e-07	2.64389e-06	0.55	3.64	0.93	0.14	3.54	3.74
ENSMUSG00000056383.10	AI987944	AI987944	1.07	4.89	2.64539e-07	2.32124e-06	5.43	4.36	5.41	5.44	4.31	4.4
ENSMUSG00000021188.14	Trip11	TRIP11	-1.2	4.98	2.6988e-07	2.3488e-06	4.38	5.58	4.46	4.3	5.61	5.54
ENSMUSG00000021485.14	Mxd3	MXD3	1.39	3.52	3.00221e-07	2.51124e-06	4.21	2.83	4.28	4.15	2.87	2.78
ENSMUSG00000054808.15	Actn4	ACTN4	-1.51	7.77	2.69384e-07	2.34607e-06	7.02	8.53	6.88	7.16	8.47	8.58
ENSMUSG00000029208.16	Guf1	GUF1	1.17	6.37	2.57106e-07	2.28577e-06	6.95	5.79	7.03	6.87	5.83	5.73
ENSMUSG00000040661.6	Rad54l2	RAD54L2	-1.1	6.04	2.60328e-07	2.30064e-06	5.49	6.58	5.55	5.43	6.62	6.55
ENSMUSG00000025937.6	Lactb2	LACTB2	1.09	4.6	2.71682e-07	2.35588e-06	5.15	4.06	5.18	5.12	4.05	4.07
ENSMUSG00000050002.14	Idnk	IDNK	1.55	3.86	2.92497e-07	2.47086e-06	4.63	3.08	4.76	4.5	3.07	3.1
ENSMUSG00000075229.11	Ccdc58	CCDC58	1.19	5.99	2.56822e-07	2.28552e-06	6.59	5.4	6.69	6.49	5.39	5.41
ENSMUSG00000009614.16	Sardh	SARDH	-1.35	4.13	2.91234e-07	2.46317e-06	3.46	4.8	3.35	3.55	4.77	4.84
ENSMUSG00000028675.12	Pnrc2	PNRC2	1.03	7.2	2.63877e-07	2.31755e-06	7.71	6.69	7.72	7.71	6.66	6.71
ENSMUSG00000034220.7	Gpc1	GPC1	-1.05	6.92	2.63003e-07	2.31729e-06	6.4	7.45	6.37	6.43	7.42	7.47
ENSMUSG00000070867.4	Trabd2b	TRABD2B	-2.78	1.2	3.09144e-07	2.56008e-06	-0.17	2.59	0.05	-0.44	2.58	2.6
ENSMUSG00000039771.13	Polr2j	POLR2J	1.03	6.26	2.58561e-07	2.29638e-06	6.78	5.75	6.82	6.73	5.74	5.75
ENSMUSG00000020808.3	Pimreg	PIMREG	0.99	6.09	2.59118e-07	2.29638e-06	6.58	5.6	6.6	6.57	5.58	5.61
ENSMUSG00000109336.1	Samd4b	SAMD4B	-1.57	4.32	2.91289e-07	2.46317e-06	3.54	5.11	3.7	3.38	5.17	5.04
ENSMUSG00000032560.14	Dnajc13	DNAJC13	-1.03	6.71	2.63937e-07	2.31755e-06	6.2	7.22	6.16	6.23	7.24	7.21
ENSMUSG00000026932.14	Nacc2	NACC2	-1.19	4.34	2.87952e-07	2.44668e-06	3.75	4.94	3.69	3.8	4.94	4.93
ENSMUSG00000066036.14	Ubr4	UBR4	-1.6	6.84	2.66382e-07	2.32785e-06	6.04	7.64	6.21	5.86	7.66	7.62
ENSMUSG00000028443.6	Nudt2	NUDT2	1.25	4.45	2.79399e-07	2.3976e-06	5.07	3.83	5.15	4.99	3.78	3.87
ENSMUSG00000021811.7	Dnajc9	DNAJC9	1.01	6.34	2.61498e-07	2.30878e-06	6.85	5.84	6.83	6.86	5.87	5.8
ENSMUSG00000002660.8	Clpp	CLPP	0.98	5.91	2.60396e-07	2.30064e-06	6.4	5.42	6.4	6.4	5.42	5.43
ENSMUSG00000049658.13	Bdp1	BDP1	-1.12	6.21	2.65118e-07	2.32155e-06	5.64	6.77	5.72	5.57	6.78	6.76
ENSMUSG00000030342.8	Cd9	CD9	1.21	7.25	2.68382e-07	2.34167e-06	7.86	6.64	7.91	7.8	6.57	6.72
ENSMUSG00000032602.6	Slc25a20	SLC25A20	1.02	5.23	2.65872e-07	2.32656e-06	5.74	4.72	5.74	5.73	4.69	4.75
ENSMUSG00000066571.13	4931406P16Rik	4931406P16RIK	-1.01	6.37	2.65064e-07	2.32155e-06	5.86	6.88	5.87	5.85	6.9	6.85
ENSMUSG00000022385.11	Gtse1	GTSE1	-1.01	5.88	2.66218e-07	2.32785e-06	5.38	6.38	5.38	5.37	6.4	6.36
ENSMUSG00000047757.16	Fancb	FANCB	1.48	4.12	2.92777e-07	2.47086e-06	4.87	3.38	4.96	4.78	3.49	3.27
ENSMUSG00000028029.10	Aimp1	AIMP1	1.04	6.95	2.68601e-07	2.34167e-06	7.46	6.42	7.51	7.42	6.43	6.42
ENSMUSG00000030717.9	Nupr1	NUPR1	1.3	4	2.96796e-07	2.49536e-06	4.66	3.36	4.69	4.62	3.27	3.44
ENSMUSG00000068040.10	Tm9sf4	TM9SF4	-1.01	5.47	2.72421e-07	2.35588e-06	4.96	5.97	4.96	4.96	5.98	5.97
ENSMUSG00000024486.6	Hbegf	HBEGF	-1.12	5.56	2.72493e-07	2.35588e-06	5	6.12	5.08	4.93	6.12	6.12
ENSMUSG00000038009.7	Dnajc22	DNAJC22	2.36	0.99	3.30564e-07	2.64476e-06	2.19	-0.16	2.17	2.19	-0.12	-0.26
ENSMUSG00000056342.16	Usp34	USP34	-1.01	6.97	2.72533e-07	2.35588e-06	6.47	7.48	6.46	6.48	7.47	7.49
ENSMUSG00000025858.12	Get4	GET4	1.02	6.96	2.71613e-07	2.35588e-06	7.47	6.46	7.51	7.44	6.46	6.45
ENSMUSG00000068250.13	Amn1	AMN1	1.98	4.51	2.89292e-07	2.45426e-06	5.5	3.52	5.72	5.28	3.48	3.57
ENSMUSG00000032340.8	Neo1	NEO1	-1.07	6.59	2.71411e-07	2.35588e-06	6.05	7.12	6.06	6.04	7.18	7.06
ENSMUSG00000017421.18	Zfp207	ZFP207	1.11	8.29	2.85675e-07	2.43605e-06	8.84	7.73	8.86	8.82	7.77	7.7
ENSMUSG00000037062.13	Sh3glb1	SH3GLB1	-1.04	6.84	2.73553e-07	2.36131e-06	6.32	7.36	6.29	6.35	7.39	7.33
ENSMUSG00000028780.13	Sema3c	SEMA3C	-1.02	6.21	2.72484e-07	2.35588e-06	5.7	6.72	5.68	5.72	6.75	6.69
ENSMUSG00000032892.14	Rangrf	RANGRF	1.25	3.64	3.12471e-07	2.56936e-06	4.27	3.01	4.29	4.24	3.02	3
ENSMUSG00000053128.15	Rnf26	RNF26	-1.13	4.77	2.89468e-07	2.45426e-06	4.21	5.33	4.23	4.17	5.37	5.29
ENSMUSG00000024501.20	Dpysl3	DPYSL3	-1.75	7.88	2.86994e-07	2.44136e-06	7.01	8.75	6.82	7.2	8.77	8.74
ENSMUSG00000028906.16	Epb41	EPB41	-1.01	6.06	2.75313e-07	2.37192e-06	5.55	6.56	5.53	5.58	6.55	6.57
ENSMUSG00000004665.10	Cnn2	CNN2	-1.21	7.48	2.83429e-07	2.42687e-06	6.88	8.09	6.79	6.96	8.12	8.06
ENSMUSG00000038495.14	Otud7b	OTUD7B	-1.2	6.23	2.76978e-07	2.38008e-06	5.63	6.84	5.53	5.73	6.82	6.85
ENSMUSG00000006763.14	Saal1	SAAL1	1	5.57	2.73713e-07	2.36131e-06	6.06	5.07	6.09	6.04	5.05	5.09
ENSMUSG00000038539.15	Atf5	ATF5	-1.21	4.72	2.94157e-07	2.48087e-06	4.12	5.32	4.08	4.14	5.26	5.39
ENSMUSG00000028322.11	Exosc3	EXOSC3	1.04	5.4	2.76122e-07	2.37728e-06	5.92	4.88	5.94	5.9	4.83	4.92
ENSMUSG00000034765.6	Dusp5	DUSP5	-1.42	3.6	3.2855e-07	2.63725e-06	2.9	4.31	2.85	2.94	4.38	4.25
ENSMUSG00000023156.4	Rpp14	RPP14	1.15	6.16	2.76509e-07	2.37902e-06	6.73	5.58	6.83	6.64	5.58	5.58
ENSMUSG00000026755.14	Arpc5l	ARPC5L	1.18	6.17	2.77004e-07	2.38008e-06	6.75	5.58	6.85	6.66	5.59	5.58
ENSMUSG00000047909.11	Ankrd16	ANKRD16	2.02	4.49	3.00906e-07	2.51383e-06	5.51	3.49	5.73	5.28	3.43	3.54
ENSMUSG00000021660.14	Btf3	BTF3	1.29	9.65	3.13255e-07	2.57199e-06	10.3	9	10.38	10.22	8.98	9.03
ENSMUSG00000026111.15	Unc50	UNC50	1.23	5.31	2.82213e-07	2.41919e-06	5.93	4.7	6.03	5.82	4.7	4.68
ENSMUSG00000078784.8	1810022K09Rik	1810022K09RIK	1.33	6.21	2.79417e-07	2.3976e-06	6.88	5.55	7	6.76	5.61	5.49
ENSMUSG00000001642.18	Akr1b3	AKR1B3	1.16	7.76	2.91105e-07	2.46317e-06	8.34	7.17	8.33	8.34	7.25	7.1
ENSMUSG00000095677.2	Dynlt1f	DYNLT1F	1.14	6.73	2.82311e-07	2.41919e-06	7.3	6.17	7.38	7.23	6.2	6.13
ENSMUSG00000066415.4	Msl2	MSL2	-1.02	5.52	2.85991e-07	2.43605e-06	5.01	6.03	5.03	4.99	6.01	6.05
ENSMUSG00000022483.17	Col2a1	COL2A1	-2.17	1.96	3.66843e-07	2.78916e-06	0.89	3.05	0.79	0.96	2.96	3.14
ENSMUSG00000028849.17	Map7d1	MAP7D1	-1.09	6.52	2.83779e-07	2.42689e-06	5.97	7.06	6.04	5.91	7.06	7.07
ENSMUSG00000032135.15	Mcam	MCAM	-1.13	6.6	2.84279e-07	2.42793e-06	6.04	7.17	6	6.08	7.24	7.1
ENSMUSG00000035342.14	Lzts2	LZTS2	-1.03	6.54	2.84135e-07	2.42793e-06	6.03	7.05	6.04	6.01	7.01	7.1
ENSMUSG00000041396.13	Mettl18	METTL18	1.27	3.62	3.26389e-07	2.62814e-06	4.26	2.99	4.3	4.21	3	2.98
ENSMUSG00000050931.7	Sgms2	SGMS2	-1.29	4.02	3.21392e-07	2.60757e-06	3.38	4.67	3.32	3.44	4.71	4.62
ENSMUSG00000117621.1	Hspe1-rs1	HSPE1-RS1	1.95	4.24	3.12852e-07	2.57085e-06	5.21	3.26	5.4	5.02	3.38	3.14
ENSMUSG00000071653.9	1810009A15Rik	1810009A15RIK	1.51	5.95	2.83587e-07	2.42687e-06	6.7	5.19	6.87	6.53	5.17	5.21
ENSMUSG00000023087.15	Noct	NOCT	-1.23	4.47	3.10458e-07	2.56474e-06	3.87	5.08	3.93	3.79	5.05	5.12
ENSMUSG00000087119.4	Atg4a-ps	ATG4A-PS	1.44	2.98	3.50432e-07	2.73318e-06	3.7	2.26	3.65	3.74	2.26	2.25
ENSMUSG00000008683.16	Rps15a	RPS15A	1.48	9.95	3.23179e-07	2.61618e-06	10.69	9.21	10.82	10.55	9.18	9.24
ENSMUSG00000031386.14	Hcfc1	HCFC1	-1.44	6.86	2.90333e-07	2.45995e-06	6.14	7.58	6.28	6	7.64	7.52
ENSMUSG00000024073.16	Birc6	BIRC6	-1.56	7.46	2.96849e-07	2.49536e-06	6.68	8.24	6.84	6.52	8.28	8.2
ENSMUSG00000028645.11	Slc2a1	SLC2A1	-1.51	7.58	2.98177e-07	2.50324e-06	6.83	8.34	6.67	6.98	8.33	8.35
ENSMUSG00000026895.7	Ndufa8	NDUFA8	1.09	6.37	2.85835e-07	2.43605e-06	6.92	5.83	6.99	6.84	5.82	5.83
ENSMUSG00000048970.9	C1galt1c1	C1GALT1C1	1.12	4.46	3.05646e-07	2.53768e-06	5.03	3.91	5.07	4.98	3.89	3.91
ENSMUSG00000031783.10	Polr2c	POLR2C	0.98	6.44	2.8673e-07	2.44073e-06	6.94	5.96	6.95	6.92	5.97	5.94
ENSMUSG00000049804.9	Armcx4	ARMCX4	-1.47	3.08	3.57803e-07	2.76494e-06	2.35	3.82	2.4	2.29	3.82	3.8
ENSMUSG00000032883.15	Acsl3	ACSL3	1.29	7.48	2.96017e-07	2.49222e-06	8.13	6.84	8.01	8.25	6.82	6.86
ENSMUSG00000031176.8	Dynlt3	DYNLT3	1.17	6.52	2.88002e-07	2.44668e-06	7.1	5.94	7.2	7	5.93	5.94
ENSMUSG00000079508.8	Apoo	APOO	1.22	5.01	2.96086e-07	2.49222e-06	5.62	4.4	5.72	5.52	4.42	4.38
ENSMUSG00000024130.16	Abca3	ABCA3	-1.22	3.92	3.3173e-07	2.65001e-06	3.31	4.53	3.34	3.29	4.52	4.54
ENSMUSG00000022425.16	Enpp2	ENPP2	3.24	0.26	3.0146e-07	2.51386e-06	1.88	-1.29	1.74	2.02	-1.41	-1.3
ENSMUSG00000057963.9	Itpk1	ITPK1	-1.43	4.79	3.10456e-07	2.56474e-06	4.08	5.5	3.93	4.22	5.45	5.56
ENSMUSG00000017314.12	Mpp2	MPP2	-1.47	3.14	3.59909e-07	2.77258e-06	2.41	3.88	2.38	2.43	3.83	3.91
ENSMUSG00000031939.16	Taf1d	TAF1D	1.7	10.27	3.33326e-07	2.65488e-06	11.12	9.42	11.31	10.93	9.42	9.42
ENSMUSG00000024799.16	Tm7sf2	TM7SF2	1.51	2.67	3.68274e-07	2.79334e-06	3.43	1.92	3.4	3.46	1.9	1.93
ENSMUSG00000027079.15	Clp1	CLP1	1.03	5.03	2.9844e-07	2.50374e-06	5.55	4.52	5.58	5.52	4.53	4.49
ENSMUSG00000045071.14	E130308A19Rik	E130308A19RIK	-1.25	3.9	3.36629e-07	2.67112e-06	3.28	4.53	3.33	3.22	4.52	4.53
ENSMUSG00000029191.16	Rfc1	RFC1	-1.03	6.85	2.97091e-07	2.49576e-06	6.34	7.36	6.3	6.37	7.38	7.34
ENSMUSG00000019809.16	Pex3	PEX3	1.24	4.28	3.18542e-07	2.59926e-06	4.9	3.66	4.98	4.82	3.69	3.64
ENSMUSG00000026921.18	Egfl7	EGFL7	1.5	3.29	3.51803e-07	2.73812e-06	4.04	2.55	4.03	4.05	2.43	2.67
ENSMUSG00000024299.17	Adamts10	ADAMTS10	1.77	4.23	3.22913e-07	2.61618e-06	5.12	3.34	5.31	4.93	3.33	3.36
ENSMUSG00000028898.15	Trnau1ap	TRNAU1AP	1.18	5.17	2.98628e-07	2.50374e-06	5.75	4.58	5.85	5.66	4.57	4.58
ENSMUSG00000059921.15	Unc5c	UNC5C	-2.23	2.73	3.80277e-07	2.84868e-06	1.63	3.85	1.66	1.58	4	3.69
ENSMUSG00000058291.14	Zfp68	ZFP68	1.24	7.24	3.01008e-07	2.51383e-06	7.86	6.62	7.97	7.75	6.6	6.64
ENSMUSG00000015133.17	Lrrk1	LRRK1	-1.29	6.41	2.99056e-07	2.50406e-06	5.76	7.05	5.88	5.64	7.07	7.04
ENSMUSG00000073791.11	Efcab7	EFCAB7	1.45	3.21	3.57323e-07	2.76429e-06	3.93	2.49	4.01	3.86	2.5	2.48
ENSMUSG00000002015.5	Bcap31	BCAP31	1	7.04	3.00306e-07	2.51124e-06	7.54	6.54	7.56	7.52	6.55	6.53
ENSMUSG00000027784.10	Ppm1l	PPM1L	-1.16	4.64	3.18985e-07	2.60122e-06	4.06	5.22	4.01	4.12	5.19	5.25
ENSMUSG00000022312.11	Eif3h	EIF3H	1.21	9	3.24883e-07	2.61804e-06	9.61	8.39	9.67	9.55	8.35	8.44
ENSMUSG00000022022.3	Mtrf1	MTRF1	1.49	3.82	3.38374e-07	2.67917e-06	4.57	3.08	4.69	4.44	3.06	3.1
ENSMUSG00000021662.11	Arhgef28	ARHGEF28	-1.21	4.84	3.15389e-07	2.57872e-06	4.23	5.45	4.15	4.31	5.4	5.49
ENSMUSG00000071176.10	Arhgef10	ARHGEF10	-1.32	3.8	3.4651e-07	2.71763e-06	3.14	4.46	3.18	3.1	4.41	4.52
ENSMUSG00000027363.15	Usp8	USP8	-1.13	5.82	3.01796e-07	2.51386e-06	5.25	6.38	5.17	5.33	6.37	6.4
ENSMUSG00000028212.16	Ccne2	CCNE2	1.37	6.63	2.99055e-07	2.50406e-06	7.32	5.95	7.45	7.19	6.01	5.89
ENSMUSG00000062753.14	AI413582	AI413582	1.85	3.77	3.44021e-07	2.70647e-06	4.7	2.86	4.88	4.51	2.82	2.87
ENSMUSG00000030653.17	Gm45837	GM45837	-8.43	-2.92	9.7018e-09	7.83906e-07	-5.44	1.31	-7.11	-7.16	1.34	1.25
ENSMUSG00000002804.4	Nudt14	NUDT14	1.33	4.76	3.12333e-07	2.56936e-06	5.43	4.1	5.53	5.31	4.04	4.16
ENSMUSG00000027170.12	Eif3m	EIF3M	1.35	8.24	3.17247e-07	2.592e-06	8.92	7.56	9.05	8.79	7.57	7.56
ENSMUSG00000027663.12	Zmat3	ZMAT3	-1.23	6.53	3.0283e-07	2.52018e-06	5.91	7.15	6.02	5.81	7.17	7.13
ENSMUSG00000026836.15	Acvr1	ACVR1	-1.13	4.51	3.26643e-07	2.62853e-06	3.95	5.07	3.9	3.99	5.08	5.06
ENSMUSG00000060098.11	Prmt7	PRMT7	0.97	6.58	3.0139e-07	2.51386e-06	7.07	6.09	7.07	7.07	6.1	6.09
ENSMUSG00000029135.10	Fosl2	FOSL2	-1.19	8.22	3.20121e-07	2.60298e-06	7.62	8.82	7.7	7.55	8.8	8.84
ENSMUSG00000025195.9	Dnmbp	DNMBP	-1.08	4.64	3.24201e-07	2.61804e-06	4.1	5.18	4.1	4.09	5.17	5.19
ENSMUSG00000000787.12	Ddx3x	DDX3X	-1.16	8.92	3.30227e-07	2.64418e-06	8.34	9.5	8.3	8.38	9.53	9.47
ENSMUSG00000023118.15	Sympk	SYMPK	-1.03	7.18	3.09344e-07	2.56008e-06	6.67	7.7	6.7	6.64	7.68	7.72
ENSMUSG00000030225.11	Dera	DERA	0.99	5.11	3.08349e-07	2.5568e-06	5.61	4.62	5.6	5.62	4.61	4.62
ENSMUSG00000051149.15	Adnp	ADNP	-1.43	3.52	3.6398e-07	2.78885e-06	2.81	4.25	2.87	2.74	4.18	4.3
ENSMUSG00000027115.14	Kif18a	KIF18A	1.06	5.9	3.01756e-07	2.51386e-06	6.42	5.37	6.47	6.38	5.42	5.32
ENSMUSG00000026761.12	Orc4	ORC4	1.1	6.34	3.03368e-07	2.52203e-06	6.89	5.79	6.97	6.81	5.79	5.78
ENSMUSG00000025579.14	Gaa	GAA	-1.18	5.5	3.11848e-07	2.56919e-06	4.9	6.08	4.85	4.96	6.01	6.16
ENSMUSG00000000489.7	Pdgfb	PDGFB	-1	5.46	3.11017e-07	2.56564e-06	4.96	5.96	4.94	4.97	5.97	5.94
ENSMUSG00000024392.17	Bag6	BAG6	-1.13	6.98	3.10508e-07	2.56474e-06	6.42	7.54	6.49	6.34	7.53	7.56
ENSMUSG00000031714.9	Gab1	GAB1	-1.39	3.9	3.53072e-07	2.743e-06	3.21	4.59	3.28	3.12	4.53	4.65
ENSMUSG00000074918.4	Inafm2	INAFM2	-1.16	4.41	3.35545e-07	2.6669e-06	3.83	5	3.89	3.77	4.99	5
ENSMUSG00000024177.9	Nme4	NME4	1.11	5.79	3.04834e-07	2.53258e-06	6.34	5.23	6.4	6.27	5.18	5.28
ENSMUSG00000041845.11	Rhod	RHOD	1.01	5.61	3.059e-07	2.53813e-06	6.12	5.11	6.15	6.07	5.1	5.11
ENSMUSG00000026659.13	Dusp12	DUSP12	1.58	4.4	3.31795e-07	2.65001e-06	5.19	3.61	5.35	5.03	3.63	3.59
ENSMUSG00000028085.12	Gatb	GATB	1.06	4.61	3.24644e-07	2.61804e-06	5.14	4.08	5.14	5.14	4.11	4.05
ENSMUSG00000041168.10	Lonp1	LONP1	-1.21	7.41	3.19403e-07	2.60132e-06	6.8	8.01	6.72	6.89	7.97	8.05
ENSMUSG00000029108.14	Pcdh7	PCDH7	-1.09	7.49	3.20216e-07	2.60298e-06	6.95	8.04	6.9	7	8.01	8.06
ENSMUSG00000052738.14	Suclg1	SUCLG1	0.98	6.71	3.11647e-07	2.56918e-06	7.21	6.22	7.2	7.21	6.21	6.24
ENSMUSG00000041219.14	Arhgap11a	ARHGAP11A	-0.99	5.76	3.13849e-07	2.57243e-06	5.26	6.25	5.28	5.24	6.26	6.24
ENSMUSG00000038005.15	Hpf1	HPF1	1.02	5.46	3.1073e-07	2.56492e-06	5.96	4.95	6.01	5.92	4.94	4.96
ENSMUSG00000022205.15	Sub1	SUB1	1.03	7.54	3.20148e-07	2.60298e-06	8.05	7.03	8.09	8.02	7.03	7.02
ENSMUSG00000115987.1	Vps28	VPS28	1.01	5.76	3.08801e-07	2.5589e-06	6.26	5.26	6.22	6.31	5.23	5.28
ENSMUSG00000073599.10	Ecscr	ECSCR	4.91	-0.08	2.41738e-07	2.20734e-06	2.38	-2.4	2.59	2.16	-2.23	-2.85
ENSMUSG00000043923.8	Ccdc84	CCDC84	1.75	3.66	3.61682e-07	2.78014e-06	4.54	2.8	4.7	4.37	2.84	2.74
ENSMUSG00000032409.15	Atr	ATR	-1.02	6.25	3.13392e-07	2.57199e-06	5.75	6.76	5.79	5.7	6.76	6.76
ENSMUSG00000028741.13	Mrto4	MRTO4	1.21	6.93	3.15373e-07	2.57872e-06	7.54	6.32	7.65	7.43	6.34	6.31
ENSMUSG00000007739.10	Cct4	CCT4	1.13	9.17	3.44434e-07	2.70708e-06	9.73	8.61	9.74	9.72	8.62	8.59
ENSMUSG00000037622.14	Wdtc1	WDTC1	-1.22	4.52	3.40049e-07	2.68746e-06	3.91	5.13	3.97	3.84	5.08	5.18
ENSMUSG00000017721.15	Pigt	PIGT	-1.11	5.13	3.24769e-07	2.61804e-06	4.58	5.69	4.5	4.65	5.68	5.7
ENSMUSG00000045294.11	Insig1	INSIG1	1.24	6.26	3.12302e-07	2.56936e-06	6.88	5.64	6.81	6.95	5.74	5.55
ENSMUSG00000049760.6	Micos13	MICOS13	1.54	6.28	3.1419e-07	2.57358e-06	7.05	5.52	7.23	6.88	5.46	5.57
ENSMUSG00000009376.15	Met	MET	-1.17	6.97	3.20568e-07	2.60418e-06	6.38	7.55	6.29	6.46	7.59	7.51
ENSMUSG00000022722.18	Arl6	ARL6	1.13	4.02	3.50955e-07	2.73318e-06	4.58	3.46	4.58	4.58	3.45	3.45
ENSMUSG00000078193.2	Gm2000	GM2000	1.6	8.28	3.35204e-07	2.6669e-06	9.07	7.47	9.26	8.89	7.45	7.5
ENSMUSG00000026047.13	Kdelc1	KDELC1	0.99	6.2	3.13809e-07	2.57243e-06	6.69	5.7	6.68	6.7	5.67	5.74
ENSMUSG00000039518.7	Cdsn	CDSN	-2.58	1.31	3.9785e-07	2.92418e-06	0.04	2.6	-0.21	0.24	2.59	2.61
ENSMUSG00000044308.17	Ubr3	UBR3	-0.99	6.27	3.19201e-07	2.60132e-06	5.78	6.77	5.76	5.79	6.74	6.79
ENSMUSG00000046351.11	Zfp322a	ZFP322A	1.03	6.11	3.1542e-07	2.57872e-06	6.62	5.59	6.68	6.57	5.57	5.61
ENSMUSG00000048126.16	Col6a3	COL6A3	-2.86	1.42	4.01275e-07	2.94566e-06	0.01	2.85	0.31	-0.34	2.79	2.89
ENSMUSG00000060743.12	H3f3a	H3F3A	1.38	9.78	3.58855e-07	2.76945e-06	10.46	9.09	10.56	10.37	9.02	9.15
ENSMUSG00000026623.16	Lpgat1	LPGAT1	-1.04	6.6	3.20999e-07	2.60604e-06	6.08	7.12	6.04	6.11	7.16	7.07
ENSMUSG00000042111.9	Ccdc115	CCDC115	1.1	4.96	3.26917e-07	2.62909e-06	5.51	4.41	5.58	5.44	4.4	4.42
ENSMUSG00000061755.10	Bod1l	BOD1L	-1.43	6.45	3.23271e-07	2.61618e-06	5.73	7.17	5.89	5.58	7.18	7.15
ENSMUSG00000013701.13	Timm23	TIMM23	1.25	7.66	3.32433e-07	2.65346e-06	8.29	7.04	8.39	8.18	7.08	6.99
ENSMUSG00000011257.19	Pabpc4	PABPC4	-1.03	7.84	3.36731e-07	2.67112e-06	7.33	8.36	7.33	7.32	8.37	8.34
ENSMUSG00000039239.14	Tgfb2	TGFB2	-1.32	3.74	3.77277e-07	2.83477e-06	3.08	4.41	3.04	3.13	4.36	4.45
ENSMUSG00000028833.13	Ncdn	NCDN	-1.07	4.85	3.41056e-07	2.69044e-06	4.31	5.39	4.36	4.27	5.4	5.38
ENSMUSG00000023923.10	Tbc1d5	TBC1D5	-1.25	4.27	3.59512e-07	2.77119e-06	3.64	4.9	3.73	3.56	4.87	4.93
ENSMUSG00000021967.4	Mrpl57	MRPL57	1.55	5.7	3.24073e-07	2.61804e-06	6.47	4.92	6.65	6.29	4.92	4.93
ENSMUSG00000021488.8	Nsd1	NSD1	-1.04	6.87	3.28193e-07	2.63604e-06	6.34	7.38	6.39	6.3	7.41	7.36
ENSMUSG00000018770.9	Atp5g3	ATP5G3	1.1	8.28	3.43728e-07	2.70647e-06	8.83	7.73	8.87	8.79	7.71	7.76
ENSMUSG00000031955.10	Bcar1	BCAR1	-1.1	6.96	3.29272e-07	2.64139e-06	6.4	7.51	6.47	6.34	7.53	7.48
ENSMUSG00000051444.9	Bbs12	BBS12	1	4.93	3.33059e-07	2.65488e-06	5.43	4.44	5.43	5.43	4.43	4.43
ENSMUSG00000026179.14	Pnkd	PNKD	1.07	4.35	3.49197e-07	2.72944e-06	4.89	3.82	4.9	4.88	3.81	3.82
ENSMUSG00000062963.10	Ufc1	UFC1	1.06	6.48	3.24931e-07	2.61804e-06	7.02	5.96	7.08	6.95	5.93	5.98
ENSMUSG00000028218.19	Fam92a	FAM92A	1.06	5.88	3.22804e-07	2.61618e-06	6.42	5.36	6.47	6.36	5.31	5.39
ENSMUSG00000029430.13	Ran	RAN	1.42	10.92	3.81783e-07	2.85357e-06	11.63	10.21	11.74	11.52	10.22	10.21
ENSMUSG00000030538.15	Cib1	CIB1	1.07	5.12	3.30724e-07	2.64476e-06	5.65	4.58	5.72	5.59	4.58	4.59
ENSMUSG00000028016.9	Ints12	INTS12	0.96	5.62	3.24312e-07	2.61804e-06	6.11	5.14	6.09	6.12	5.16	5.13
ENSMUSG00000061477.4	Rps7	RPS7	1.55	10.41	3.77176e-07	2.83477e-06	11.18	9.63	11.33	11.03	9.59	9.67
ENSMUSG00000024317.15	Rnf138	RNF138	1.04	5.52	3.27173e-07	2.62949e-06	6.04	5	6.09	5.98	4.96	5.03
ENSMUSG00000019907.10	Ppp1r12a	PPP1R12A	-1.11	6.38	3.30239e-07	2.64418e-06	5.83	6.94	5.91	5.75	6.95	6.93
ENSMUSG00000004085.14	Map3k20	MAP3K20	-1.07	7.58	3.4056e-07	2.68984e-06	7.05	8.12	7.02	7.08	8.16	8.07
ENSMUSG00000070565.11	Rasal2	RASAL2	-1.23	3.81	3.81728e-07	2.85357e-06	3.2	4.43	3.21	3.17	4.4	4.44
ENSMUSG00000063884.6	Ptcd3	PTCD3	1.05	7.62	3.39384e-07	2.68552e-06	8.14	7.1	8.18	8.11	7.13	7.07
ENSMUSG00000020716.16	Nf1	NF1	-1.26	5.43	3.37848e-07	2.67729e-06	4.8	6.06	4.93	4.68	6.05	6.07
ENSMUSG00000067455.5	Hist1h4j	HIST1H4J	1.35	8.33	3.49527e-07	2.73036e-06	9	7.66	9.11	8.9	7.73	7.58
ENSMUSG00000020721.16	Helz	HELZ	-1.14	4.6	3.54923e-07	2.75071e-06	4.03	5.17	4.09	3.96	5.17	5.16
ENSMUSG00000039089.15	L3mbtl3	L3MBTL3	-1.2	4.25	3.67519e-07	2.78927e-06	3.65	4.85	3.71	3.58	4.83	4.87
ENSMUSG00000074867.4	Zfp808	ZFP808	1.23	3.86	3.73705e-07	2.81951e-06	4.47	3.25	4.53	4.42	3.27	3.22
ENSMUSG00000022350.7	Washc5	WASHC5	-1.19	6.34	3.33222e-07	2.65488e-06	5.74	6.94	5.64	5.85	6.93	6.94
ENSMUSG00000027454.10	Gins1	GINS1	1.14	4.48	3.52165e-07	2.73927e-06	5.04	3.91	5.11	4.98	3.92	3.9
ENSMUSG00000033565.18	Rbfox2	RBFOX2	-1.02	7.17	3.37927e-07	2.67729e-06	6.66	7.68	6.62	6.69	7.69	7.67
ENSMUSG00000025137.15	Pcyt2	PCYT2	1.21	5.33	3.35574e-07	2.6669e-06	5.94	4.73	6.04	5.84	4.77	4.68
ENSMUSG00000022270.16	Retreg1	RETREG1	1.08	4.47	3.55176e-07	2.751e-06	5.01	3.93	5.01	5	3.89	3.97
ENSMUSG00000043987.18	Cep164	CEP164	-1.07	4.93	3.50891e-07	2.73318e-06	4.4	5.47	4.37	4.43	5.5	5.44
ENSMUSG00000022216.17	Psme1	PSME1	1.09	5.63	3.3344e-07	2.65488e-06	6.18	5.09	6.19	6.17	5.01	5.17
ENSMUSG00000079435.9	Rpl36a	RPL36A	1.18	9.03	3.67231e-07	2.78916e-06	9.62	8.44	9.67	9.56	8.4	8.47
ENSMUSG00000046949.16	Nqo2	NQO2	0.98	5.17	3.39732e-07	2.68661e-06	5.66	4.68	5.64	5.68	4.67	4.68
ENSMUSG00000000295.13	Hddc2	HDDC2	1.23	5.53	3.36211e-07	2.6703e-06	6.14	4.91	6.26	6.03	4.93	4.89
ENSMUSG00000057637.13	Prdm2	PRDM2	-1.23	4.98	3.55773e-07	2.75396e-06	4.37	5.59	4.48	4.25	5.6	5.59
ENSMUSG00000039246.8	Lyplal1	LYPLAL1	1.36	3.41	4.01462e-07	2.94566e-06	4.08	2.73	4.14	4.03	2.68	2.78
ENSMUSG00000038803.7	Ost4	OST4	1.06	6.8	3.40942e-07	2.69044e-06	7.33	6.27	7.39	7.27	6.3	6.24
ENSMUSG00000023882.15	Zfp54	ZFP54	1.63	3.15	4.13315e-07	3.00277e-06	3.96	2.34	4.09	3.83	2.33	2.33
ENSMUSG00000032932.15	Hspa13	HSPA13	1.02	6.83	3.41308e-07	2.69077e-06	7.35	6.32	7.4	7.3	6.31	6.33
ENSMUSG00000066637.2	Ttc32	TTC32	1.63	3.03	4.18855e-07	3.01985e-06	3.85	2.23	3.97	3.72	2.2	2.24
ENSMUSG00000049950.6	Rpp38	RPP38	1.38	4.37	3.65973e-07	2.78916e-06	5.07	3.69	5.19	4.94	3.67	3.7
ENSMUSG00000042178.6	Armc5	ARMC5	-1.22	3.88	3.9179e-07	2.90129e-06	3.28	4.5	3.24	3.31	4.48	4.5
ENSMUSG00000031954.6	Cfdp1	CFDP1	1.03	7.2	3.46531e-07	2.71763e-06	7.71	6.69	7.75	7.68	6.72	6.66
ENSMUSG00000006732.14	Mettl1	METTL1	1.11	4.37	3.65546e-07	2.78916e-06	4.93	3.82	4.97	4.89	3.84	3.79
ENSMUSG00000021116.10	Eif2s1	EIF2S1	1.21	8.32	3.61759e-07	2.78014e-06	8.93	7.72	9.02	8.84	7.75	7.69
ENSMUSG00000022359.10	Wdyhv1	WDYHV1	1.12	4.39	3.65205e-07	2.78916e-06	4.95	3.84	5	4.9	3.85	3.82
ENSMUSG00000036499.9	Eea1	EEA1	-1.04	5.95	3.44743e-07	2.70785e-06	5.44	6.46	5.38	5.49	6.47	6.46
ENSMUSG00000038400.15	Pmepa1	PMEPA1	-1	6.34	3.44145e-07	2.70647e-06	5.85	6.84	5.87	5.82	6.87	6.81
ENSMUSG00000031917.12	Nip7	NIP7	1.38	7.13	3.48595e-07	2.7264e-06	7.82	6.45	7.97	7.67	6.46	6.43
ENSMUSG00000063316.13	Rpl27	RPL27	1.44	9.49	3.8317e-07	2.8606e-06	10.21	8.77	10.35	10.07	8.75	8.79
ENSMUSG00000030744.13	Rps3	RPS3	1.56	11.39	4.08594e-07	2.97922e-06	12.17	10.62	12.31	12.03	10.58	10.65
ENSMUSG00000039159.16	Ube2h	UBE2H	-1.45	6.42	3.4747e-07	2.72093e-06	5.7	7.14	5.55	5.84	7.08	7.21
ENSMUSG00000020056.16	Washc3	WASHC3	1.25	5.06	3.50525e-07	2.73318e-06	5.68	4.44	5.79	5.57	4.44	4.43
ENSMUSG00000021714.15	Cenpk	CENPK	1.43	3.87	3.89065e-07	2.88611e-06	4.6	3.17	4.69	4.5	3.24	3.07
ENSMUSG00000038416.15	Cdc16	CDC16	1.02	7.56	3.54389e-07	2.74823e-06	8.06	7.05	8.09	8.04	7.04	7.06
ENSMUSG00000061607.15	Mdc1	MDC1	-1.16	4.83	3.64439e-07	2.78903e-06	4.26	5.42	4.34	4.18	5.39	5.44
ENSMUSG00000036986.16	Pml	PML	-1.12	5.54	3.50877e-07	2.73318e-06	4.98	6.1	5.06	4.9	6.08	6.11
ENSMUSG00000061410.6	Zcchc14	ZCCHC14	-1.29	6.37	3.48186e-07	2.72487e-06	5.72	7.01	5.85	5.6	7.04	6.98
ENSMUSG00000030554.16	Synm	SYNM	-1.67	2.5	4.51487e-07	3.15033e-06	1.68	3.34	1.73	1.62	3.3	3.38
ENSMUSG00000051351.14	Zfp46	ZFP46	-1.11	4.98	3.62406e-07	2.78344e-06	4.43	5.53	4.35	4.49	5.51	5.55
ENSMUSG00000028367.5	Txn1	TXN1	1.14	8.73	3.7429e-07	2.82227e-06	9.29	8.16	9.33	9.26	8.21	8.1
ENSMUSG00000028409.11	Smu1	SMU1	1.01	7.67	3.57839e-07	2.76494e-06	8.18	7.17	8.17	8.18	7.18	7.15
ENSMUSG00000058331.15	Zfp85	ZFP85	1.97	3.09	4.2736e-07	3.05179e-06	4.08	2.12	4.26	3.9	2.02	2.19
ENSMUSG00000001285.12	Myg1	MYG1	0.99	5.75	3.44017e-07	2.70647e-06	6.24	5.25	6.22	6.27	5.29	5.22
ENSMUSG00000035357.16	Pdzrn3	PDZRN3	-1.22	4.96	3.65025e-07	2.78916e-06	4.35	5.57	4.24	4.46	5.56	5.58
ENSMUSG00000020010.7	Vnn3	VNN3	5.68	-1.42	8.52906e-08	1.42244e-06	1.44	-3.83	1.5	1.35	-4.09	-4.44
ENSMUSG00000014444.17	Piezo1	PIEZO1	-1.47	6.7	3.53299e-07	2.7431e-06	5.97	7.44	6.12	5.82	7.51	7.37
ENSMUSG00000034462.9	Pkd2	PKD2	-1.02	6.82	3.52438e-07	2.73973e-06	6.3	7.34	6.26	6.35	7.31	7.36
ENSMUSG00000033918.16	Parl	PARL	1.03	5.75	3.47056e-07	2.71935e-06	6.26	5.23	6.3	6.22	5.28	5.18
ENSMUSG00000057530.14	Ece1	ECE1	-1.24	4.55	3.7957e-07	2.8478e-06	3.94	5.18	3.83	4.04	5.16	5.19
ENSMUSG00000060938.14	Rpl26	RPL26	1.47	10.36	4.04963e-07	2.96117e-06	11.1	9.62	11.23	10.96	9.59	9.65
ENSMUSG00000032727.14	Mier3	MIER3	-1.03	5.03	3.66169e-07	2.78916e-06	4.51	5.54	4.49	4.53	5.57	5.52
ENSMUSG00000037563.15	Rps16	RPS16	1.46	10.3	4.05703e-07	2.96321e-06	11.03	9.57	11.14	10.92	9.49	9.65
ENSMUSG00000027937.15	Jtb	JTB	1.33	5.41	3.54356e-07	2.74823e-06	6.07	4.75	6.2	5.94	4.69	4.8
ENSMUSG00000036568.7	Bicral	BICRAL	-1.39	3.19	4.37053e-07	3.08976e-06	2.5	3.89	2.53	2.46	3.91	3.86
ENSMUSG00000038722.17	Bud31	BUD31	1.38	7.26	3.60928e-07	2.77709e-06	7.95	6.57	8.1	7.8	6.59	6.56
ENSMUSG00000069208.9	Zfp825	ZFP825	1.24	3.99	3.94806e-07	2.91016e-06	4.62	3.38	4.69	4.53	3.37	3.38
ENSMUSG00000000355.13	Mcts1	MCTS1	1.16	4.83	3.66757e-07	2.78916e-06	5.42	4.26	5.5	5.33	4.27	4.24
ENSMUSG00000063856.7	Gpx1	GPX1	1.36	8.57	3.81038e-07	2.85133e-06	9.24	7.89	9.37	9.12	7.84	7.94
ENSMUSG00000040204.6	Pclaf	PCLAF	1.06	7.44	3.63966e-07	2.78885e-06	7.96	6.91	7.99	7.94	6.96	6.86
ENSMUSG00000046027.17	Stard5	STARD5	1.43	2.78	4.49131e-07	3.14073e-06	3.49	2.06	3.5	3.48	2.08	2.05
ENSMUSG00000022241.6	Tars	TARS	-1.05	6.94	3.62931e-07	2.78581e-06	6.42	7.47	6.36	6.48	7.49	7.45
ENSMUSG00000025225.15	Nfkb2	NFKB2	-1.01	5.05	3.72162e-07	2.80952e-06	4.54	5.55	4.56	4.53	5.55	5.56
ENSMUSG00000021241.7	Isca2	ISCA2	1.54	4.86	3.72001e-07	2.80952e-06	5.63	4.1	5.8	5.46	4.07	4.12
ENSMUSG00000050621.7	Rps27rt	RPS27RT	1.45	6.57	3.59391e-07	2.77119e-06	7.29	5.85	7.45	7.14	5.78	5.91
ENSMUSG00000074305.9	Peak1	PEAK1	-1.45	4.4	3.97329e-07	2.92203e-06	3.68	5.12	3.84	3.51	5.13	5.11
ENSMUSG00000052428.10	Tmco1	TMCO1	1.14	6.28	3.58375e-07	2.76742e-06	6.85	5.71	6.94	6.76	5.68	5.74
ENSMUSG00000032724.5	Abtb2	ABTB2	-1.37	4.01	4.13061e-07	3.00277e-06	3.33	4.7	3.45	3.19	4.71	4.67
ENSMUSG00000045996.12	Polr2k	POLR2K	1.74	4.65	3.82127e-07	2.85448e-06	5.52	3.79	5.71	5.33	3.85	3.72
ENSMUSG00000062198.5	2700097O09Rik	2700097O09RIK	1.27	3.69	4.15959e-07	3.00895e-06	4.32	3.06	4.39	4.26	3.04	3.07
ENSMUSG00000035021.13	Baz1a	BAZ1A	-1.17	6.63	3.65368e-07	2.78916e-06	6.04	7.21	6.1	5.99	7.3	7.12
ENSMUSG00000028926.15	Cdk14	CDK14	-0.98	5.63	3.67037e-07	2.78916e-06	5.14	6.12	5.12	5.17	6.12	6.12
ENSMUSG00000042492.12	Tbc1d10b	TBC1D10B	-0.96	5.74	3.66106e-07	2.78916e-06	5.26	6.22	5.27	5.26	6.23	6.22
ENSMUSG00000074457.10	S100a16	S100A16	1.28	5.99	3.60457e-07	2.77513e-06	6.62	5.35	6.71	6.54	5.24	5.45
ENSMUSG00000062169.13	Cnih4	CNIH4	1.11	6.92	3.66806e-07	2.78916e-06	7.47	6.36	7.56	7.38	6.36	6.36
ENSMUSG00000029600.10	Rita1	RITA1	1.36	3.19	4.41278e-07	3.10105e-06	3.87	2.51	3.87	3.87	2.57	2.44
ENSMUSG00000060639.5	Hist1h4i	HIST1H4I	1.29	5.55	3.63496e-07	2.78847e-06	6.19	4.9	6.31	6.07	4.96	4.85
ENSMUSG00000026043.18	Col3a1	COL3A1	-1.54	10.45	4.214e-07	3.03289e-06	9.69	11.22	9.56	9.81	11.14	11.3
ENSMUSG00000033943.15	Mga	MGA	-1.01	6.99	3.69646e-07	2.79712e-06	6.48	7.49	6.52	6.44	7.5	7.48
ENSMUSG00000046516.10	Cox17	COX17	1.41	5.58	3.64349e-07	2.78903e-06	6.28	4.88	6.41	6.15	4.79	4.97
ENSMUSG00000032867.8	Fbxw8	FBXW8	-1.19	6.83	3.68923e-07	2.79476e-06	6.23	7.43	6.13	6.34	7.43	7.43
ENSMUSG00000021678.9	F2rl1	F2RL1	-1.32	3.58	4.34713e-07	3.08367e-06	2.92	4.24	2.88	2.96	4.19	4.28
ENSMUSG00000052949.14	Rnf157	RNF157	-1.13	4.56	3.94129e-07	2.9088e-06	4	5.12	4.03	3.97	5.08	5.17
ENSMUSG00000001105.15	Ift20	IFT20	1.33	4.89	3.76828e-07	2.83473e-06	5.55	4.22	5.68	5.43	4.25	4.2
ENSMUSG00000040524.9	Zfp609	ZFP609	-1.1	5.06	3.80371e-07	2.84868e-06	4.51	5.61	4.58	4.44	5.59	5.63
ENSMUSG00000032002.10	Dcun1d5	DCUN1D5	1.21	6.92	3.71579e-07	2.80952e-06	7.53	6.32	7.64	7.42	6.35	6.29
ENSMUSG00000066151.11	Fkbp15	FKBP15	-1.08	4.44	4.01797e-07	2.94644e-06	3.9	4.98	3.9	3.9	5	4.97
ENSMUSG00000020895.14	Tmem107	TMEM107	1.19	3.69	4.24677e-07	3.04451e-06	4.29	3.1	4.26	4.31	3.11	3.08
ENSMUSG00000025785.5	Exosc7	EXOSC7	0.95	5.64	3.67288e-07	2.78916e-06	6.12	5.17	6.13	6.1	5.18	5.15
ENSMUSG00000023020.3	Cox14	COX14	1.35	5.67	3.69114e-07	2.79476e-06	6.34	5	6.46	6.22	4.91	5.07
ENSMUSG00000033039.10	Micall1	MICALL1	-1.19	5.37	3.80461e-07	2.84868e-06	4.78	5.96	4.89	4.67	5.98	5.95
ENSMUSG00000049866.12	Arl4c	ARL4C	-1.05	6.96	3.76116e-07	2.83234e-06	6.44	7.48	6.38	6.49	7.47	7.5
ENSMUSG00000078864.10	Gm14322	GM14322	1.49	3.14	4.53345e-07	3.15985e-06	3.88	2.4	3.98	3.78	2.4	2.39
ENSMUSG00000071337.11	Tia1	TIA1	1.33	6.61	3.71937e-07	2.80952e-06	7.28	5.94	7.42	7.13	5.93	5.95
ENSMUSG00000026201.12	Stk16	STK16	1.12	6.21	3.68898e-07	2.79476e-06	6.78	5.65	6.87	6.68	5.67	5.63
ENSMUSG00000039662.16	Icmt	ICMT	-0.97	5.81	3.74589e-07	2.82286e-06	5.32	6.29	5.34	5.31	6.3	6.28
ENSMUSG00000084883.2	Ccdc85c	CCDC85C	-1.1	5.08	3.86923e-07	2.87428e-06	4.53	5.63	4.46	4.6	5.61	5.65
ENSMUSG00000021009.15	Ptpn21	PTPN21	-1.11	5.08	3.87037e-07	2.87428e-06	4.53	5.63	4.6	4.45	5.63	5.64
ENSMUSG00000028108.15	Ecm1	ECM1	-1.22	3.73	4.37823e-07	3.08976e-06	3.12	4.34	3.12	3.12	4.36	4.32
ENSMUSG00000034361.10	Cpne2	CPNE2	-1.26	4.93	3.94225e-07	2.9088e-06	4.31	5.56	4.34	4.27	5.66	5.46
ENSMUSG00000062997.6	Rpl35	RPL35	1.62	9.26	4.147e-07	3.00664e-06	10.07	8.46	10.26	9.88	8.43	8.48
ENSMUSG00000046573.7	Lyrm4	LYRM4	1.16	4	4.18088e-07	3.01844e-06	4.58	3.42	4.63	4.54	3.44	3.39
ENSMUSG00000033916.5	Chmp2a	CHMP2A	1.16	6.5	3.76289e-07	2.83234e-06	7.08	5.92	7.17	6.98	5.88	5.96
ENSMUSG00000026096.14	Osgepl1	OSGEPL1	1.09	4.11	4.1574e-07	3.00895e-06	4.66	3.57	4.67	4.66	3.56	3.58
ENSMUSG00000095115.2	Itpripl2	ITPRIPL2	-0.99	7.26	3.87247e-07	2.87428e-06	6.77	7.76	6.75	6.79	7.77	7.75
ENSMUSG00000024778.13	Fas	FAS	2.02	2.3	4.98396e-07	3.37024e-06	3.31	1.31	3.41	3.21	1.12	1.47
ENSMUSG00000026696.15	Vamp4	VAMP4	1.11	5.14	3.85603e-07	2.87162e-06	5.7	4.58	5.74	5.65	4.51	4.65
ENSMUSG00000020952.10	Scfd1	SCFD1	0.95	5.84	3.78209e-07	2.84012e-06	6.31	5.37	6.31	6.31	5.34	5.39
ENSMUSG00000025793.17	Hgs	HGS	-1.17	5.35	3.92893e-07	2.90441e-06	4.77	5.95	4.66	4.87	5.92	5.96
ENSMUSG00000036644.15	Tbc1d9b	TBC1D9B	-1.01	5.49	3.89544e-07	2.88704e-06	4.98	5.99	5	4.96	5.95	6.03
ENSMUSG00000069089.8	Cdk7	CDK7	1.29	6.63	3.83611e-07	2.86223e-06	7.28	5.98	7.41	7.15	5.95	6.02
ENSMUSG00000020664.10	Dld	DLD	1.02	7.41	3.92293e-07	2.90165e-06	7.92	6.91	7.88	7.96	6.89	6.93
ENSMUSG00000025533.15	Asl	ASL	1.06	5.85	3.79678e-07	2.8478e-06	6.38	5.32	6.3	6.46	5.32	5.31
ENSMUSG00000032103.10	Pus3	PUS3	1	5.32	3.86211e-07	2.87198e-06	5.83	4.82	5.87	5.78	4.85	4.8
ENSMUSG00000065990.12	Aurkaip1	AURKAIP1	0.96	6.41	3.83947e-07	2.86307e-06	6.89	5.94	6.93	6.86	5.94	5.93
ENSMUSG00000029375.6	Cxcl15	CXCL15	4.57	-0.04	3.46625e-07	2.71763e-06	2.26	-2.2	2.47	2.04	-2.01	-2.65
ENSMUSG00000040648.14	Ppip5k2	PPIP5K2	-1.02	6.63	3.89641e-07	2.88704e-06	6.12	7.14	6.08	6.17	7.18	7.11
ENSMUSG00000047721.8	Bola2	BOLA2	1.4	6.32	3.85476e-07	2.87162e-06	7.02	5.62	7.17	6.86	5.57	5.66
ENSMUSG00000035093.16	Secisbp2l	SECISBP2L	-1.03	5.51	3.94279e-07	2.9088e-06	5	6.03	4.96	5.03	6.07	5.99
ENSMUSG00000026411.17	Tmem9	TMEM9	0.97	5.58	3.85767e-07	2.87162e-06	6.06	5.09	6.08	6.04	5.06	5.12
ENSMUSG00000021982.14	Cdadc1	CDADC1	1.33	3.98	4.34576e-07	3.08367e-06	4.64	3.31	4.73	4.55	3.25	3.37
ENSMUSG00000020736.12	Nt5c	NT5C	1.28	6.13	3.86264e-07	2.87198e-06	6.77	5.5	6.9	6.64	5.46	5.53
ENSMUSG00000027671.14	Actl6a	ACTL6A	1.01	6.89	3.92252e-07	2.90165e-06	7.39	6.39	7.44	7.35	6.42	6.36
ENSMUSG00000024236.18	Svil	SVIL	-1.13	5.49	3.97142e-07	2.92203e-06	4.93	6.06	5.02	4.83	6.04	6.08
ENSMUSG00000038422.2	Hdhd3	HDHD3	1.56	2.54	5.01709e-07	3.38819e-06	3.32	1.77	3.37	3.27	1.7	1.81
ENSMUSG00000034675.17	Dbn1	DBN1	-1	7.16	3.97293e-07	2.92203e-06	6.66	7.66	6.63	6.7	7.66	7.67
ENSMUSG00000027076.10	Timm10	TIMM10	1.52	4.73	4.09217e-07	2.98207e-06	5.49	3.96	5.65	5.32	4.01	3.92
ENSMUSG00000058093.13	Zfp729b	ZFP729B	1.02	4.86	4.03603e-07	2.95461e-06	5.37	4.35	5.39	5.35	4.31	4.39
ENSMUSG00000039262.16	Prrc2b	PRRC2B	-1.47	6.82	3.98143e-07	2.92466e-06	6.08	7.55	6.25	5.91	7.56	7.54
ENSMUSG00000020801.8	Med31	MED31	1.72	4.44	4.22769e-07	3.03592e-06	5.3	3.58	5.5	5.11	3.61	3.55
ENSMUSG00000060147.15	Serpinb6a	SERPINB6A	1.25	8.81	4.26883e-07	3.05178e-06	9.43	8.18	9.54	9.32	8.18	8.18
ENSMUSG00000062691.10	Cebpzos	CEBPZOS	1.75	4.11	4.37983e-07	3.08976e-06	4.98	3.25	5.17	4.8	3.2	3.27
ENSMUSG00000030446.17	Zfp273	ZFP273	1.75	2.63	5.06015e-07	3.41008e-06	3.51	1.77	3.64	3.38	1.71	1.8
ENSMUSG00000030560.17	Ctsc	CTSC	1.16	4.5	4.18881e-07	3.01985e-06	5.09	3.92	5.01	5.17	3.94	3.91
ENSMUSG00000022681.15	Ntan1	NTAN1	1.03	5.5	3.94394e-07	2.9088e-06	6.02	4.98	6.08	5.95	4.99	4.97
ENSMUSG00000020003.16	Pex7	PEX7	1.37	4.72	4.13698e-07	3.00277e-06	5.41	4.04	5.55	5.27	4.04	4.03
ENSMUSG00000042354.7	Gnl3	GNL3	1.23	8.05	4.15246e-07	3.00795e-06	8.67	7.44	8.78	8.56	7.47	7.4
ENSMUSG00000014551.8	Mrps25	MRPS25	0.97	5.44	3.95164e-07	2.91112e-06	5.93	4.96	5.96	5.9	4.98	4.94
ENSMUSG00000027230.9	Creb3l1	CREB3L1	-3.01	0.32	4.24489e-07	3.04451e-06	-1.14	1.84	-1.04	-1.32	1.81	1.84
ENSMUSG00000038456.9	Dennd2a	DENND2A	-1	5	4.15352e-07	3.00795e-06	4.5	5.5	4.48	4.5	5.48	5.51
ENSMUSG00000024533.17	Spire1	SPIRE1	-1.07	5.45	4.07465e-07	2.97268e-06	4.92	5.98	4.88	4.95	6.04	5.92
ENSMUSG00000038664.16	Herc1	HERC1	-1.26	6.4	4.02744e-07	2.95e-06	5.78	7.03	5.9	5.65	7.04	7.02
ENSMUSG00000044674.6	Fzd1	FZD1	-1.04	5.67	4.04622e-07	2.96037e-06	5.15	6.19	5.1	5.19	6.14	6.24
ENSMUSG00000025188.15	Hps1	HPS1	-1.14	4.7	4.28003e-07	3.05298e-06	4.13	5.27	4.18	4.08	5.21	5.31
ENSMUSG00000051256.10	Jagn1	JAGN1	1.34	5.49	4.02106e-07	2.94701e-06	6.16	4.82	6.29	6.02	4.88	4.76
ENSMUSG00000030061.16	Uba3	UBA3	1.04	7.34	4.10536e-07	2.98998e-06	7.86	6.81	7.92	7.8	6.81	6.82
ENSMUSG00000025026.15	Add3	ADD3	-1.83	5.51	4.21094e-07	3.03239e-06	4.6	6.43	4.37	4.83	6.34	6.52
ENSMUSG00000020514.8	Mrpl22	MRPL22	1.08	4.81	4.18214e-07	3.01844e-06	5.36	4.28	5.42	5.3	4.31	4.24
ENSMUSG00000000568.15	Hnrnpd	HNRNPD	-1.05	6.27	4.06797e-07	2.9695e-06	5.74	6.79	5.73	5.75	6.72	6.86
ENSMUSG00000005687.14	Bcas2	BCAS2	1.11	6.63	4.05389e-07	2.9626e-06	7.18	6.08	7.27	7.1	6.04	6.11
ENSMUSG00000032540.16	Abhd5	ABHD5	0.99	5.04	4.13951e-07	3.0029e-06	5.54	4.54	5.5	5.57	4.56	4.53
ENSMUSG00000032845.16	Alpk2	ALPK2	-2.31	1.35	5.36535e-07	3.56142e-06	0.22	2.51	0.03	0.36	2.5	2.5
ENSMUSG00000037621.8	Atoh8	ATOH8	-1.47	4.44	4.50528e-07	3.14696e-06	3.71	5.18	3.82	3.6	5.28	5.08
ENSMUSG00000019302.16	Atp6v0a1	ATP6V0A1	-1.07	4.44	4.46293e-07	3.12942e-06	3.91	4.97	3.89	3.92	4.98	4.97
ENSMUSG00000070953.13	Rabepk	RABEPK	1.11	5	4.20191e-07	3.0276e-06	5.56	4.45	5.64	5.48	4.48	4.41
ENSMUSG00000039910.10	Cited2	CITED2	-0.98	6.34	4.13494e-07	3.00277e-06	5.86	6.83	5.89	5.81	6.83	6.83
ENSMUSG00000055760.12	Gemin6	GEMIN6	1.08	4.9	4.23534e-07	3.03971e-06	5.45	4.36	5.51	5.37	4.38	4.34
ENSMUSG00000024683.6	Mrpl16	MRPL16	0.96	5.45	4.11837e-07	2.99775e-06	5.93	4.97	5.96	5.9	4.97	4.98
ENSMUSG00000032715.9	Trib3	TRIB3	-1.46	3.8	4.84376e-07	3.30738e-06	3.06	4.53	2.94	3.19	4.46	4.59
ENSMUSG00000057841.5	Rpl32	RPL32	1.59	10.47	4.79417e-07	3.28967e-06	11.27	9.67	11.44	11.09	9.63	9.71
ENSMUSG00000048399.4	Tprg	TPRG	1.94	1.49	5.57492e-07	3.65321e-06	2.46	0.54	2.43	2.48	0.46	0.58
ENSMUSG00000038257.9	Glra3	GLRA3	1.95	1.59	5.58353e-07	3.65698e-06	2.56	0.64	2.5	2.61	0.54	0.69
ENSMUSG00000094622.2	Gm3055	GM3055	1.3	4.35	4.47217e-07	3.13419e-06	5.01	3.7	5.11	4.9	3.65	3.75
ENSMUSG00000071856.10	Mcc	MCC	-1.29	4.94	4.37741e-07	3.08976e-06	4.29	5.58	4.43	4.15	5.56	5.6
ENSMUSG00000017734.15	Dbndd2	DBNDD2	1.05	4.94	4.25199e-07	3.04655e-06	5.47	4.42	5.47	5.46	4.35	4.48
ENSMUSG00000021276.10	Cinp	CINP	1.11	6.06	4.12114e-07	2.99806e-06	6.62	5.51	6.68	6.55	5.57	5.44
ENSMUSG00000031078.15	Cttn	CTTN	-1.26	8.56	4.48129e-07	3.13715e-06	7.93	9.19	7.83	8.03	9.16	9.21
ENSMUSG00000021196.14	Pfkp	PFKP	-1.1	6.77	4.21993e-07	3.03544e-06	6.21	7.32	6.14	6.29	7.27	7.37
ENSMUSG00000041886.7	Macc1	MACC1	1.16	4.87	4.31208e-07	3.06957e-06	5.45	4.29	5.36	5.54	4.25	4.33
ENSMUSG00000028710.17	Atpaf1	ATPAF1	0.99	4.96	4.27979e-07	3.05298e-06	5.46	4.47	5.47	5.44	4.5	4.44
ENSMUSG00000035274.13	Tpbg	TPBG	-0.95	5.82	4.22227e-07	3.03544e-06	5.34	6.29	5.35	5.34	6.27	6.31
ENSMUSG00000026197.12	Zfand2b	ZFAND2B	1.15	4.07	4.64518e-07	3.21499e-06	4.64	3.5	4.69	4.6	3.46	3.53
ENSMUSG00000094724.8	Rnaset2b	RNASET2B	1	5.1	4.26409e-07	3.05119e-06	5.59	4.6	5.63	5.56	4.57	4.63
ENSMUSG00000024150.12	Mcfd2	MCFD2	1.04	6.1	4.16624e-07	3.01036e-06	6.62	5.58	6.68	6.56	5.62	5.53
ENSMUSG00000027099.9	Mtx2	MTX2	0.94	6.03	4.16358e-07	3.01014e-06	6.51	5.56	6.53	6.48	5.58	5.55
ENSMUSG00000026273.13	Mterf4	MTERF4	1.01	4.78	4.36852e-07	3.08976e-06	5.28	4.27	5.28	5.28	4.23	4.31
ENSMUSG00000073702.11	Rpl31	RPL31	1.32	9.64	4.74602e-07	3.2724e-06	10.3	8.98	10.42	10.19	8.96	9
ENSMUSG00000050188.8	Lsm10	LSM10	1.12	4.35	4.54838e-07	3.16853e-06	4.92	3.8	4.96	4.87	3.75	3.85
ENSMUSG00000043903.4	Zfp469	ZFP469	-1.43	4.23	4.75972e-07	3.27656e-06	3.51	4.94	3.67	3.35	4.91	4.97
ENSMUSG00000062127.11	Cttnbp2nl	CTTNBP2NL	-1	5.84	4.26562e-07	3.05119e-06	5.34	6.34	5.28	5.39	6.34	6.34
ENSMUSG00000060427.15	Zfp868	ZFP868	0.99	4.84	4.36773e-07	3.08976e-06	5.34	4.34	5.36	5.31	4.35	4.33
ENSMUSG00000074093.4	Svip	SVIP	1.12	4.33	4.57457e-07	3.17986e-06	4.88	3.77	4.89	4.88	3.7	3.84
ENSMUSG00000048100.13	Taf13	TAF13	1.03	4.54	4.48543e-07	3.13833e-06	5.05	4.02	5.09	5.02	4.02	4.01
ENSMUSG00000001100.10	Poldip2	POLDIP2	0.98	7.28	4.32634e-07	3.07233e-06	7.77	6.8	7.79	7.75	6.77	6.82
ENSMUSG00000025035.9	Arl3	ARL3	1.08	5.26	4.27267e-07	3.05179e-06	5.8	4.72	5.81	5.8	4.63	4.8
ENSMUSG00000020650.15	Bcap29	BCAP29	0.97	5.06	4.32324e-07	3.07183e-06	5.54	4.58	5.57	5.52	4.58	4.58
ENSMUSG00000013736.16	Trnt1	TRNT1	1.01	6.82	4.28437e-07	3.05437e-06	7.32	6.31	7.38	7.27	6.33	6.3
ENSMUSG00000054889.10	Dsp	DSP	-2.36	0.99	5.45222e-07	3.59646e-06	-0.16	2.18	-0.17	-0.21	2.15	2.2
ENSMUSG00000069135.11	Fgfr1op	FGFR1OP	0.94	6.15	4.22628e-07	3.03592e-06	6.62	5.69	6.62	6.62	5.71	5.66
ENSMUSG00000019873.8	Reep3	REEP3	-1.04	5.22	4.39822e-07	3.09421e-06	4.7	5.73	4.71	4.68	5.79	5.68
ENSMUSG00000042548.14	Asxl1	ASXL1	-1.25	6.23	4.31287e-07	3.06957e-06	5.61	6.85	5.73	5.48	6.87	6.83
ENSMUSG00000003812.13	Dnase2a	DNASE2A	1.23	3.82	4.88286e-07	3.32559e-06	4.43	3.2	4.45	4.41	3.12	3.28
ENSMUSG00000033323.14	Ctdp1	CTDP1	-1	5.37	4.38347e-07	3.09008e-06	4.88	5.87	4.89	4.86	5.9	5.83
ENSMUSG00000028232.13	Tmem68	TMEM68	1.32	5.13	4.36654e-07	3.08976e-06	5.79	4.47	5.93	5.65	4.46	4.48
ENSMUSG00000001150.7	Mcm3ap	MCM3AP	-0.95	5.9	4.32086e-07	3.07183e-06	5.43	6.38	5.41	5.44	6.36	6.39
ENSMUSG00000045414.7	Dipk2a	DIPK2A	-1.46	6.2	4.35248e-07	3.08576e-06	5.47	6.92	5.3	5.64	6.89	6.96
ENSMUSG00000044452.10	Zfp507	ZFP507	-0.97	6.18	4.31716e-07	3.07091e-06	5.7	6.66	5.69	5.7	6.62	6.7
ENSMUSG00000029066.12	Mrpl20	MRPL20	1.46	6.47	4.30163e-07	3.06497e-06	7.21	5.74	7.38	7.03	5.77	5.71
ENSMUSG00000026821.16	Ralgds	RALGDS	-1.07	4.82	4.56593e-07	3.17558e-06	4.29	5.36	4.34	4.23	5.33	5.38
ENSMUSG00000036977.8	Anapc10	ANAPC10	1.29	4.3	4.68232e-07	3.23719e-06	4.95	3.66	5.06	4.84	3.69	3.62
ENSMUSG00000071654.6	Uqcc3	UQCC3	1.28	4.45	4.63184e-07	3.21096e-06	5.09	3.81	5.19	4.99	3.74	3.87
ENSMUSG00000078429.9	Ctdsp2	CTDSP2	-0.99	6.87	4.38511e-07	3.09008e-06	6.38	7.37	6.34	6.41	7.33	7.4
ENSMUSG00000098789.7	Jmjd7	JMJD7	1.24	3.53	5.09366e-07	3.42366e-06	4.16	2.91	4.19	4.11	2.94	2.87
ENSMUSG00000023915.5	Tnfrsf21	TNFRSF21	-1.05	5.01	4.52851e-07	3.15813e-06	4.48	5.54	4.43	4.54	5.56	5.51
ENSMUSG00000079215.8	Zfp664	ZFP664	-1.03	6.94	4.40146e-07	3.09479e-06	6.43	7.46	6.37	6.49	7.45	7.47
ENSMUSG00000038611.17	Phrf1	PHRF1	-1.13	6.45	4.3776e-07	3.08976e-06	5.88	7.01	5.98	5.79	7.02	7.01
ENSMUSG00000032097.10	Ddx6	DDX6	-1.27	7.05	4.44857e-07	3.12277e-06	6.42	7.69	6.31	6.53	7.62	7.75
ENSMUSG00000030397.10	Mark4	MARK4	-1.27	4.06	4.9728e-07	3.36716e-06	3.44	4.7	3.53	3.32	4.69	4.71
ENSMUSG00000030979.13	Uros	UROS	1.56	3.45	5.19706e-07	3.47674e-06	4.23	2.67	4.36	4.09	2.72	2.62
ENSMUSG00000025574.13	Tk1	TK1	1.02	6.6	4.38924e-07	3.09129e-06	7.11	6.08	7.15	7.07	6.14	6.03
ENSMUSG00000042289.11	Hsd3b7	HSD3B7	1.06	6.57	4.39628e-07	3.09421e-06	7.09	6.04	7.17	7.02	6.01	6.06
ENSMUSG00000040621.14	Gemin8	GEMIN8	1.39	3.58	5.15537e-07	3.45607e-06	4.28	2.89	4.37	4.18	2.94	2.83
ENSMUSG00000005882.18	Uqcc1	UQCC1	0.94	5.73	4.36851e-07	3.08976e-06	6.2	5.26	6.22	6.17	5.28	5.24
ENSMUSG00000029247.17	Paics	PAICS	1.16	9.75	4.98525e-07	3.37024e-06	10.33	9.17	10.28	10.38	9.15	9.19
ENSMUSG00000000915.15	Hip1r	HIP1R	-1	7.22	4.50759e-07	3.14696e-06	6.72	7.71	6.71	6.73	7.67	7.76
ENSMUSG00000066842.18	Hmcn1	HMCN1	-2.5	1.1	5.71924e-07	3.70047e-06	-0.12	2.36	-0.03	-0.26	2.27	2.43
ENSMUSG00000040102.10	Klhl42	KLHL42	-0.98	5.59	4.47936e-07	3.13715e-06	5.1	6.07	5.06	5.14	6.09	6.06
ENSMUSG00000039105.6	Atp6v1g1	ATP6V1G1	1.15	8.47	4.73512e-07	3.26841e-06	9.05	7.9	9.13	8.96	7.89	7.91
ENSMUSG00000035877.17	Zhx3	ZHX3	-1.43	2.94	5.64372e-07	3.6776e-06	2.23	3.66	2.2	2.26	3.68	3.62
ENSMUSG00000009549.14	Srp14	SRP14	1.21	6.37	4.41963e-07	3.10416e-06	6.98	5.77	7.1	6.86	5.73	5.8
ENSMUSG00000030852.17	Tacc2	TACC2	-1.19	5.07	4.6371e-07	3.21113e-06	4.47	5.66	4.58	4.37	5.7	5.63
ENSMUSG00000071866.12	Ppia	PPIA	1.29	11.47	5.32575e-07	3.54064e-06	12.11	10.82	12.17	12.05	10.83	10.82
ENSMUSG00000005469.10	Prkaca	PRKACA	-1.01	5.72	4.5028e-07	3.14696e-06	5.21	6.22	5.15	5.27	6.2	6.24
ENSMUSG00000051375.15	Pcdh1	PCDH1	-1.75	2.09	6.02076e-07	3.82051e-06	1.23	2.97	1.15	1.28	2.96	2.98
ENSMUSG00000052539.15	Magi3	MAGI3	-0.99	5.38	4.55807e-07	3.17183e-06	4.88	5.88	4.86	4.91	5.84	5.91
ENSMUSG00000053178.5	Mterf1b	MTERF1B	1.7	2.74	5.72654e-07	3.70332e-06	3.59	1.9	3.72	3.46	1.92	1.87
ENSMUSG00000032051.9	Fdx1	FDX1	1.16	4.3	4.85852e-07	3.3143e-06	4.88	3.73	4.93	4.84	3.65	3.8
ENSMUSG00000074129.14	Rpl13a	RPL13A	1.72	11.68	5.42043e-07	3.58872e-06	12.54	10.81	12.73	12.35	10.76	10.87
ENSMUSG00000022503.10	Nubp1	NUBP1	1.08	6.01	4.45526e-07	3.12576e-06	6.55	5.47	6.6	6.5	5.55	5.4
ENSMUSG00000021639.17	Gtf2h2	GTF2H2	0.95	5.17	4.58193e-07	3.18325e-06	5.65	4.7	5.65	5.65	4.67	4.72
ENSMUSG00000021033.11	Gstz1	GSTZ1	1.02	5.26	4.60481e-07	3.19568e-06	5.78	4.75	5.82	5.73	4.71	4.8
ENSMUSG00000030469.10	Zfp719	ZFP719	1.15	5.33	4.59793e-07	3.19263e-06	5.9	4.76	6.01	5.8	4.75	4.76
ENSMUSG00000032515.8	Csrnp1	CSRNP1	-1.24	3.56	5.48043e-07	3.6079e-06	2.95	4.19	2.98	2.9	4.19	4.17
ENSMUSG00000005779.12	Psmb4	PSMB4	1.06	7.95	4.79374e-07	3.28967e-06	8.48	7.42	8.54	8.42	7.39	7.44
ENSMUSG00000036503.13	Rnf13	RNF13	0.96	6.26	4.55317e-07	3.17014e-06	6.74	5.78	6.71	6.77	5.74	5.81
ENSMUSG00000002222.14	Rmnd5a	RMND5A	-1.34	6.39	4.6355e-07	3.21113e-06	5.72	7.05	5.58	5.86	7	7.11
ENSMUSG00000022358.7	Fbxo32	FBXO32	-1.16	5.4	4.72171e-07	3.26267e-06	4.82	5.97	4.73	4.9	5.92	6.03
ENSMUSG00000045664.5	Cdc42ep2	CDC42EP2	-1.2	4.41	5.06681e-07	3.41172e-06	3.81	5.01	3.7	3.91	5	5.02
ENSMUSG00000037894.13	H2afz	H2AFZ	1.37	9.95	5.26313e-07	3.50466e-06	10.64	9.27	10.77	10.51	9.27	9.27
ENSMUSG00000020745.15	Pafah1b1	PAFAH1B1	-1.01	7.64	4.80183e-07	3.2917e-06	7.14	8.14	7.1	7.18	8.14	8.15
ENSMUSG00000040410.14	Fbxl4	FBXL4	1.08	4.4	4.9708e-07	3.36716e-06	4.94	3.87	4.93	4.95	3.81	3.92
ENSMUSG00000058013.11	2021-09-11	44450	-1.3	8.34	4.96514e-07	3.36716e-06	7.69	9	7.57	7.81	9.03	8.96
ENSMUSG00000079658.9	Eloc	ELOC	1.11	7.38	4.76908e-07	3.28124e-06	7.93	6.83	8.03	7.84	6.82	6.83
ENSMUSG00000100967.1	Gm29666	GM29666	1.94	3.24	5.70765e-07	3.699e-06	4.22	2.27	4.39	4.05	2.41	2.12
ENSMUSG00000021040.15	Slirp	SLIRP	1.29	5.87	4.62871e-07	3.21052e-06	6.52	5.22	6.66	6.38	5.2	5.25
ENSMUSG00000105827.1	Hist2h2bb	HIST2H2BB	1.62	8.06	4.91145e-07	3.33973e-06	8.88	7.25	9.08	8.67	7.21	7.29
ENSMUSG00000026944.18	Abca2	ABCA2	-1.21	4.55	5.07629e-07	3.41557e-06	3.94	5.16	4.06	3.83	5.16	5.15
ENSMUSG00000024287.8	Thoc1	THOC1	1.25	6.51	4.67099e-07	3.23111e-06	7.14	5.89	7.27	7.01	5.93	5.85
ENSMUSG00000025959.13	Klf7	KLF7	-1.17	4.58	5.06791e-07	3.41172e-06	3.99	5.17	4.08	3.9	5.13	5.19
ENSMUSG00000038811.13	Gngt2	GNGT2	2.14	1.25	6.36342e-07	3.9497e-06	2.33	0.2	2.39	2.25	0.09	0.28
ENSMUSG00000049489.5	Ccnq	CCNQ	0.99	4.58	4.95697e-07	3.36355e-06	5.08	4.08	5.08	5.07	4.08	4.08
ENSMUSG00000047044.7	D030056L22Rik	D030056L22RIK	1.2	6.92	4.7456e-07	3.2724e-06	7.52	6.32	7.64	7.4	6.3	6.34
ENSMUSG00000048482.14	Bdnf	BDNF	-0.95	5.95	4.72793e-07	3.2652e-06	5.47	6.43	5.45	5.5	6.45	6.41
ENSMUSG00000019054.13	Fis1	FIS1	1.11	7.1	4.77907e-07	3.28635e-06	7.66	6.54	7.74	7.57	6.5	6.59
ENSMUSG00000048170.14	Mcmbp	MCMBP	-0.99	6.48	4.74868e-07	3.27248e-06	5.99	6.98	5.94	6.04	7	6.96
ENSMUSG00000003435.9	Supt5	SUPT5	-0.97	6.91	4.78517e-07	3.28701e-06	6.42	7.39	6.39	6.46	7.4	7.38
ENSMUSG00000054263.12	Lifr	LIFR	-0.95	5.4	4.8195e-07	3.29822e-06	4.93	5.88	4.93	4.93	5.88	5.87
ENSMUSG00000038916.7	Soga3	SOGA3	-1.22	3.68	5.5966e-07	3.6618e-06	3.08	4.29	3.09	3.06	4.26	4.33
ENSMUSG00000021520.4	Uqcrb	UQCRB	0.97	6.61	4.75723e-07	3.27656e-06	7.09	6.12	7.13	7.05	6.15	6.09
ENSMUSG00000033016.16	Nfatc1	NFATC1	-2.09	2.37	6.41348e-07	3.9672e-06	1.34	3.42	1.58	1.07	3.44	3.37
ENSMUSG00000038170.15	Pde4dip	PDE4DIP	-1.17	6.36	4.8145e-07	3.29655e-06	5.78	6.95	5.66	5.89	6.94	6.96
ENSMUSG00000029649.10	Pomp	POMP	1.24	7.37	4.89854e-07	3.33449e-06	7.99	6.75	8.11	7.87	6.7	6.8
ENSMUSG00000020747.17	Tmem94	TMEM94	-1.05	4.91	5.03012e-07	3.3952e-06	4.39	5.44	4.45	4.33	5.45	5.42
ENSMUSG00000034602.15	Mon2	MON2	-1.16	5.95	4.84579e-07	3.30738e-06	5.37	6.53	5.48	5.26	6.53	6.53
ENSMUSG00000040270.16	Bach2	BACH2	-2.29	2.05	6.55104e-07	4.0178e-06	0.92	3.21	1.15	0.66	3.11	3.28
ENSMUSG00000061371.7	Zfp873	ZFP873	1.2	4.09	5.31928e-07	3.54001e-06	4.69	3.5	4.77	4.61	3.46	3.52
ENSMUSG00000068036.15	Afdn	AFDN	-1.11	6.82	4.86163e-07	3.31466e-06	6.26	7.37	6.35	6.17	7.39	7.35
ENSMUSG00000070544.6	Top1	TOP1	-0.98	6.53	4.83399e-07	3.3046e-06	6.04	7.02	6	6.09	7.04	7
ENSMUSG00000005447.12	Pafah1b3	PAFAH1B3	1.01	6.82	4.83947e-07	3.30658e-06	7.32	6.31	7.38	7.26	6.29	6.34
ENSMUSG00000046432.12	Bex3	BEX3	0.95	6.98	4.86917e-07	3.31803e-06	7.46	6.5	7.43	7.48	6.5	6.51
ENSMUSG00000038550.10	Ciart	CIART	-1.41	3.16	6.03608e-07	3.82624e-06	2.46	3.88	2.37	2.55	3.85	3.89
ENSMUSG00000020107.10	Anapc16	ANAPC16	1.15	5.77	4.78492e-07	3.28701e-06	6.35	5.2	6.46	6.24	5.23	5.17
ENSMUSG00000037152.11	Ndufc1	NDUFC1	1.01	5.4	4.827e-07	3.30159e-06	5.9	4.9	5.97	5.84	4.88	4.92
ENSMUSG00000032397.7	Tipin	TIPIN	0.94	6.29	4.80483e-07	3.2917e-06	6.75	5.81	6.79	6.72	5.83	5.8
ENSMUSG00000032740.16	Ccdc88a	CCDC88A	-1.05	5	5.0534e-07	3.40912e-06	4.48	5.53	4.52	4.43	5.57	5.48
ENSMUSG00000027001.10	Dusp19	DUSP19	1.34	3.94	5.45273e-07	3.59646e-06	4.62	3.27	4.73	4.5	3.26	3.28
ENSMUSG00000022684.15	Bfar	BFAR	0.93	5.78	4.80324e-07	3.2917e-06	6.25	5.32	6.25	6.24	5.28	5.35
ENSMUSG00000057230.14	Aak1	AAK1	-1.18	4.82	5.14842e-07	3.45321e-06	4.23	5.41	4.33	4.14	5.45	5.37
ENSMUSG00000038402.2	Foxf2	FOXF2	-0.96	5.29	4.9778e-07	3.36876e-06	4.8	5.77	4.78	4.83	5.76	5.78
ENSMUSG00000044162.12	Tnip3	TNIP3	2.87	0.34	5.92545e-07	3.7842e-06	1.78	-1.03	1.86	1.69	-1.28	-0.89
ENSMUSG00000032417.10	Rwdd2a	RWDD2A	1.98	1.41	6.66209e-07	4.06032e-06	2.4	0.44	2.45	2.33	0.36	0.48
ENSMUSG00000039182.6	AW209491	AW209491	1.29	5.31	4.90901e-07	3.33973e-06	5.95	4.66	6.09	5.81	4.66	4.67
ENSMUSG00000039367.11	Sec24c	SEC24C	-0.97	6.79	4.92521e-07	3.34731e-06	6.31	7.28	6.27	6.35	7.27	7.28
ENSMUSG00000036983.7	Tfb1m	TFB1M	1.25	3.26	5.91695e-07	3.78254e-06	3.88	2.64	3.9	3.86	2.61	2.66
ENSMUSG00000022884.15	Eif4a2	EIF4A2	1.35	8.41	5.22292e-07	3.49039e-06	9.09	7.74	9.23	8.94	7.73	7.75
ENSMUSG00000054469.14	Lclat1	LCLAT1	-1.18	4.18	5.50131e-07	3.61507e-06	3.59	4.77	3.65	3.53	4.81	4.72
ENSMUSG00000047030.15	Spata2	SPATA2	-1.12	4.26	5.45481e-07	3.59646e-06	3.7	4.83	3.76	3.64	4.81	4.83
ENSMUSG00000040473.15	Cfap69	CFAP69	1.23	3.32	5.92153e-07	3.78358e-06	3.94	2.71	3.97	3.91	2.7	2.71
ENSMUSG00000068391.8	Chrac1	CHRAC1	1.18	5.46	4.92846e-07	3.34774e-06	6.05	4.88	6.17	5.94	4.85	4.9
ENSMUSG00000067430.7	Zfp763	ZFP763	1.05	4.15	5.42444e-07	3.58949e-06	4.68	3.62	4.69	4.66	3.63	3.62
ENSMUSG00000037235.13	Mxd4	MXD4	-1.05	6.45	4.97179e-07	3.36716e-06	5.92	6.97	5.85	6	6.95	6.99
ENSMUSG00000022109.6	Med4	MED4	0.92	5.49	4.93408e-07	3.34979e-06	5.95	5.03	5.93	5.96	5.03	5.03
ENSMUSG00000017697.3	Ada	ADA	1.74	1.99	6.70981e-07	4.07392e-06	2.86	1.12	2.94	2.78	1.13	1.1
ENSMUSG00000022018.7	Rgcc	RGCC	1.83	2.43	6.56171e-07	4.02019e-06	3.34	1.52	3.48	3.21	1.44	1.6
ENSMUSG00000026107.11	Nabp1	NABP1	0.97	5.39	5.00212e-07	3.37986e-06	5.87	4.9	5.9	5.84	4.94	4.86
ENSMUSG00000027684.16	Mecom	MECOM	-1.1	4.51	5.45744e-07	3.59646e-06	3.96	5.06	3.9	4.03	5.05	5.08
ENSMUSG00000055128.15	Cgrrf1	CGRRF1	1.14	4.41	5.39732e-07	3.57709e-06	4.97	3.84	5.04	4.91	3.89	3.79
ENSMUSG00000028811.11	Yars	YARS	-0.96	6.46	5.05666e-07	3.40952e-06	5.98	6.94	5.94	6.02	6.95	6.93
ENSMUSG00000033364.13	Usp37	USP37	-0.96	5.52	5.11422e-07	3.43567e-06	5.04	6.01	5.02	5.07	6.03	5.98
ENSMUSG00000021391.10	Cenpp	CENPP	1.19	3.95	5.68283e-07	3.68808e-06	4.54	3.36	4.57	4.5	3.28	3.43
ENSMUSG00000031696.9	Vps35	VPS35	1.09	8.64	5.45292e-07	3.59646e-06	9.18	8.1	9.25	9.12	8.11	8.09
ENSMUSG00000026657.16	Frmd4a	FRMD4A	-1.23	4.79	5.39105e-07	3.57478e-06	4.18	5.4	4.26	4.09	5.47	5.33
ENSMUSG00000019132.11	BC005537	BC005537	-1.01	6.27	5.08623e-07	3.42045e-06	5.77	6.77	5.83	5.7	6.78	6.76
ENSMUSG00000020828.13	Pld2	PLD2	-1.15	4.14	5.74176e-07	3.70754e-06	3.57	4.71	3.6	3.53	4.67	4.76
ENSMUSG00000031788.14	Kifc3	KIFC3	-1.02	5	5.33069e-07	3.54209e-06	4.49	5.5	4.47	4.51	5.46	5.55
ENSMUSG00000043962.16	Thrap3	THRAP3	-0.99	7.89	5.3592e-07	3.55918e-06	7.39	8.38	7.38	7.41	8.4	8.36
ENSMUSG00000030057.15	Cnbp	CNBP	1.16	9.87	5.81968e-07	3.74089e-06	10.45	9.29	10.51	10.38	9.29	9.28
ENSMUSG00000063632.6	Sox11	SOX11	-1.23	4.61	5.55106e-07	3.6413e-06	4	5.22	4.11	3.88	5.19	5.25
ENSMUSG00000008333.12	Snrpb2	SNRPB2	0.97	6.52	5.12355e-07	3.44014e-06	7.01	6.04	7.03	6.98	6	6.09
ENSMUSG00000028175.15	Depdc1a	DEPDC1A	0.96	5.31	5.16084e-07	3.45793e-06	5.79	4.83	5.8	5.78	4.87	4.78
ENSMUSG00000035783.9	Acta2	ACTA2	-2.63	0.68	6.46029e-07	3.97707e-06	-0.6	2	-0.73	-0.53	2.05	1.93
ENSMUSG00000027540.13	Ptpn1	PTPN1	-0.94	5.48	5.2479e-07	3.49796e-06	5.02	5.96	4.99	5.02	5.97	5.94
ENSMUSG00000002768.8	Mea1	MEA1	1.08	5.85	5.13674e-07	3.44718e-06	6.39	5.31	6.47	6.31	5.26	5.37
ENSMUSG00000022479.15	Vdr	VDR	-1.86	1.92	7.12622e-07	4.24032e-06	1	2.86	1.04	0.95	2.92	2.79
ENSMUSG00000031652.11	N4bp1	N4BP1	-0.93	5.77	5.24704e-07	3.49796e-06	5.31	6.24	5.29	5.32	6.22	6.26
ENSMUSG00000001441.13	Npepps	NPEPPS	-0.98	6.55	5.23724e-07	3.49796e-06	6.05	7.04	6.01	6.1	7.01	7.07
ENSMUSG00000037722.8	Gnpnat1	GNPNAT1	1.26	6.81	5.24428e-07	3.49796e-06	7.45	6.19	7.58	7.31	6.17	6.2
ENSMUSG00000057367.12	Birc2	BIRC2	0.99	5.39	5.22198e-07	3.49039e-06	5.89	4.89	5.95	5.83	4.87	4.92
ENSMUSG00000076431.4	Sox4	SOX4	-1.31	8.8	5.69125e-07	3.69168e-06	8.14	9.46	8.03	8.26	9.41	9.51
ENSMUSG00000021598.9	Med10	MED10	0.94	5.67	5.19402e-07	3.47667e-06	6.14	5.21	6.19	6.1	5.2	5.21
ENSMUSG00000036372.14	Tmem258	TMEM258	0.9	6.03	5.19424e-07	3.47667e-06	6.48	5.58	6.47	6.5	5.57	5.59
ENSMUSG00000006705.13	Pknox1	PKNOX1	-1.17	3.79	6.14765e-07	3.85877e-06	3.21	4.38	3.17	3.24	4.4	4.35
ENSMUSG00000023031.8	Cela1	CELA1	1.77	3.49	6.29034e-07	3.92144e-06	4.37	2.61	4.56	4.18	2.59	2.61
ENSMUSG00000033781.7	Asb13	ASB13	1.17	3.54	6.22517e-07	3.89287e-06	4.12	2.96	4.15	4.1	2.95	2.96
ENSMUSG00000021692.9	Dimt1	DIMT1	1.43	4.98	5.44553e-07	3.59646e-06	5.7	4.27	5.86	5.53	4.28	4.25
ENSMUSG00000020482.4	Ccdc117	CCDC117	0.9	5.58	5.26342e-07	3.50466e-06	6.04	5.13	6.03	6.04	5.14	5.13
ENSMUSG00000039512.12	Uhrf1bp1	UHRF1BP1	-1.45	5.01	5.60129e-07	3.663e-06	4.29	5.73	4.47	4.1	5.74	5.72
ENSMUSG00000042515.13	Pwwp3b	PWWP3B	0.9	6	5.24349e-07	3.49796e-06	6.45	5.55	6.44	6.46	5.56	5.54
ENSMUSG00000015671.11	Psma2	PSMA2	1.03	8.19	5.617e-07	3.66938e-06	8.7	7.68	8.74	8.66	7.7	7.65
ENSMUSG00000063146.11	Clip2	CLIP2	-0.98	5.26	5.46826e-07	3.60174e-06	4.77	5.75	4.73	4.81	5.73	5.77
ENSMUSG00000031730.18	Dhodh	DHODH	0.94	5.24	5.3814e-07	3.57023e-06	5.7	4.77	5.73	5.68	4.75	4.79
ENSMUSG00000049904.7	Tmem17	TMEM17	1.59	2.86	6.79602e-07	4.10036e-06	3.66	2.07	3.76	3.56	2.16	1.97
ENSMUSG00000028246.13	Faxc	FAXC	-1.01	4.82	5.66034e-07	3.68042e-06	4.31	5.33	4.29	4.33	5.36	5.29
ENSMUSG00000022867.10	Usp25	USP25	-1.12	5.39	5.49301e-07	3.61322e-06	4.84	5.96	4.74	4.93	5.92	5.99
ENSMUSG00000074754.4	Smim26	SMIM26	2.07	3.23	6.6161e-07	4.03998e-06	4.27	2.2	4.48	4.05	2.09	2.3
ENSMUSG00000038290.15	Smg6	SMG6	-1	4.83	5.66528e-07	3.68042e-06	4.34	5.33	4.37	4.29	5.33	5.33
ENSMUSG00000034880.7	Mrpl34	MRPL34	1.01	5.75	5.32317e-07	3.54064e-06	6.25	5.25	6.31	6.19	5.2	5.29
ENSMUSG00000026469.14	Xpr1	XPR1	-1.12	4.67	5.7679e-07	3.7202e-06	4.11	5.24	4.02	4.2	5.24	5.23
ENSMUSG00000049553.11	Polr1a	POLR1A	-1.32	6.65	5.43998e-07	3.59606e-06	5.99	7.31	6.13	5.85	7.35	7.27
ENSMUSG00000000131.15	Xpo6	XPO6	-1.16	6.36	5.42047e-07	3.58872e-06	5.78	6.94	5.87	5.69	7.01	6.86
ENSMUSG00000057329.7	Bcl2	BCL2	-1.1	4.1	6.09335e-07	3.84731e-06	3.54	4.65	3.58	3.51	4.64	4.66
ENSMUSG00000015090.13	Ptgds	PTGDS	3.93	-0.06	5.7128e-07	3.70003e-06	1.9	-1.92	2	1.8	-2.5	-1.54
ENSMUSG00000039065.11	Atpsckmt	ATPSCKMT	1.22	3.64	6.27361e-07	3.91482e-06	4.25	3.04	4.31	4.2	2.99	3.08
ENSMUSG00000017404.12	Rpl19	RPL19	1.32	11.05	6.41118e-07	3.9672e-06	11.71	10.39	11.8	11.62	10.36	10.43
ENSMUSG00000039745.8	Htatip2	HTATIP2	1.31	3.2	6.60654e-07	4.03607e-06	3.86	2.54	3.82	3.88	2.61	2.47
ENSMUSG00000045435.9	Tmem60	TMEM60	1.31	5.1	5.50261e-07	3.61507e-06	5.76	4.45	5.9	5.61	4.44	4.45
ENSMUSG00000009569.14	Mrtfb	MRTFB	-1.45	4.19	6.12354e-07	3.85401e-06	3.47	4.92	3.65	3.29	4.93	4.91
ENSMUSG00000019969.14	Psen1	PSEN1	-1.04	5.38	5.54647e-07	3.64016e-06	4.86	5.91	4.78	4.94	5.91	5.9
ENSMUSG00000021286.8	Zfyve21	ZFYVE21	1.04	4.67	5.68216e-07	3.68808e-06	5.19	4.16	5.25	5.13	4.15	4.16
ENSMUSG00000037242.8	Clic4	CLIC4	-1.47	8.39	5.83295e-07	3.74754e-06	7.66	9.12	7.49	7.82	9.12	9.13
ENSMUSG00000078941.9	Ak6	AK6	0.98	7.82	5.66223e-07	3.68042e-06	8.31	7.33	8.33	8.29	7.36	7.3
ENSMUSG00000009995.17	Taz	TAZ	1.27	5.02	5.57443e-07	3.65321e-06	5.66	4.39	5.78	5.53	4.33	4.44
ENSMUSG00000038975.14	Rabggtb	RABGGTB	1.11	6.38	5.43127e-07	3.59215e-06	6.94	5.82	7.04	6.83	5.85	5.8
ENSMUSG00000046668.9	Cxxc5	CXXC5	-1.34	4.95	5.79539e-07	3.72902e-06	4.28	5.63	4.14	4.42	5.56	5.7
ENSMUSG00000022186.14	Oxct1	OXCT1	0.97	8.06	5.75816e-07	3.71626e-06	8.55	7.57	8.53	8.57	7.57	7.57
ENSMUSG00000030103.11	Bhlhe40	BHLHE40	-1.12	6.65	5.53477e-07	3.63434e-06	6.09	7.21	6	6.18	7.16	7.26
ENSMUSG00000031246.14	Sh3bgrl	SH3BGRL	1	7.96	5.74066e-07	3.70754e-06	8.46	7.46	8.49	8.42	7.43	7.48
ENSMUSG00000062101.12	Zfp119b	ZFP119B	1.32	3.09	6.80559e-07	4.10289e-06	3.75	2.43	3.81	3.69	2.43	2.42
ENSMUSG00000029815.12	Malsu1	MALSU1	1.58	4.91	5.70831e-07	3.699e-06	5.7	4.12	5.89	5.5	4.12	4.12
ENSMUSG00000020668.10	Kif3c	KIF3C	-0.94	5.45	5.6127e-07	3.66859e-06	4.97	5.92	4.95	5	5.91	5.92
ENSMUSG00000024800.8	Rpp30	RPP30	1.09	4.64	5.80887e-07	3.73581e-06	5.19	4.09	5.26	5.1	4.11	4.07
[truncated: 10,812 more rows]
