# Supplementary material for: The context-dependent epigenetic and organogenesis programs determine 3D vs. 2D cellular fitness of MYC-driven murine liver cancer cells
Source: eLife. 2025 May 6;14:RP101299. doi: 10.7554/eLife.101299 (PMC12055005; doi:10.7554/eLife.101299)
Supplement: Supplementary file 2. [file elife-101299-supp2.xlsx]

## Sheet: 2D vs 3D Normoxia
geneID	geneSymbol		log2FC	AveExpr	P.Value	FDR	2D_Nor.AveExpr	3D_Nor.AveExpr	2283539_NEJF10-2D-Nor-01	2283540_NEJF10-2D-Nor-02	2283543_NEJF10-3D-Nor-01	2283544_NEJF10-3D-Nor-02
ENSMUSG00000020826.8	Nos2	NOS2	-9.02	0.77	5.73191e-07	5.61745e-06	-3.29	5.29	-4.58	-2.92	5.27	5.3
ENSMUSG00000096764.1	Gm21985	GM21985	-8.44	-3.21	1.56611e-05	5.04788e-05	-5.04	1.02	-7.39	-7.44	1.45	0.54
ENSMUSG00000114942.1	Gm49361	GM49361	-8.4	-3.24	0.000262015	0.000513325	-5.04	0.95	-7.39	-7.44	1.77	0.09
ENSMUSG00000089837.9	Npcd	NPCD	-8.12	-3.36	9.21294e-07	7.28913e-06	-5.04	0.71	-7.39	-7.44	0.83	0.56
ENSMUSG00000030607.7	Acan	ACAN	-7.57	-1.68	1.22244e-06	8.58031e-06	-4.39	2.11	-5.81	-5.12	2.16	2.06
ENSMUSG00000000753.15	Serpinf1	SERPINF1	-7.5	0.26	3.76238e-07	4.45948e-06	-3.12	4	-3	-3.98	4	4
ENSMUSG00000030653.17	Gm45837	GM45837	-7.38	-3.73	1.32764e-06	9.00569e-06	-5.04	-0.01	-7.39	-7.44	-0.1	0.02
ENSMUSG00000035042.2	Ccl5	CCL5	-7.26	-0.35	6.97464e-07	6.19727e-06	-3.5	3.29	-4.22	-3.74	3.2	3.37
ENSMUSG00000092345.1	Gm20503	GM20503	-7.26	-3.79	1.59568e-06	1.01253e-05	-5.04	-0.12	-7.39	-7.44	-0.07	-0.24
ENSMUSG00000036602.14	Alx1	ALX1	-7.12	-1.9	1.65334e-06	1.03688e-05	-4.39	1.67	-5.81	-5.12	1.67	1.65
ENSMUSG00000039278.10	Pcsk1n	PCSK1N	-7.12	-3.85	2.92943e-06	1.52079e-05	-5.04	-0.24	-7.39	-7.44	-0.48	-0.08
ENSMUSG00000074637.7	Sox2	SOX2	-7.01	-3.92	4.89355e-06	2.14457e-05	-5.04	-0.38	-7.39	-7.44	-0.15	-0.69
ENSMUSG00000026822.14	Lcn2	LCN2	-6.84	-4	2.28753e-06	1.28593e-05	-5.04	-0.54	-7.39	-7.44	-0.56	-0.59
ENSMUSG00000034226.7	Rhov	RHOV	-6.61	0.84	7.50623e-08	2.42643e-06	-2.28	4.14	-2.53	-2.4	4.15	4.13
ENSMUSG00000031962.6	Cdh15	CDH15	-6.58	-4.14	4.99826e-05	0.000127665	-5.04	-0.81	-7.39	-7.44	-0.25	-1.47
ENSMUSG00000017737.2	Mmp9	MMP9	-6.44	1.52	7.2902e-08	2.41255e-06	-1.6	4.73	-1.46	-1.95	4.7	4.77
ENSMUSG00000055030.1	Sprr2e	SPRR2E	-6.37	-1.22	7.51999e-06	2.92965e-05	-3.77	1.97	-3.69	-5.12	1.86	2.07
ENSMUSG00000030413.7	Pglyrp1	PGLYRP1	-6.27	-4.28	5.7124e-06	2.40276e-05	-5.04	-1.09	-7.39	-7.44	-1.01	-1.29
ENSMUSG00000004098.7	Col5a3	COL5A3	-6.01	3.6	3.33962e-08	1.94883e-06	0.62	6.61	0.95	0.24	6.58	6.63
ENSMUSG00000026185.8	Igfbp5	IGFBP5	-5.96	-1.87	3.7881e-06	1.79685e-05	-4.07	1.12	-5.07	-4.63	1.05	1.17
ENSMUSG00000021478.6	Drd1	DRD1	-5.95	-4.44	1.00505e-05	3.60372e-05	-5.04	-1.39	-7.39	-7.44	-1.27	-1.67
ENSMUSG00000090958.2	Lrrc32	LRRC32	-5.87	-2.52	9.96866e-06	3.58596e-05	-4.39	0.44	-5.07	-5.85	0.29	0.54
ENSMUSG00000079033.10	Mef2b	MEF2B	-5.73	-4.56	1.35077e-05	4.50042e-05	-5.04	-1.61	-7.39	-7.44	-1.5	-1.9
ENSMUSG00000035202.8	Lars2	LARS2	-5.65	6.04	2.22455e-08	1.81603e-06	3.21	8.86	2.98	3.44	9.02	8.7
ENSMUSG00000045288.10	Ush1g	USH1G	-5.57	-4.63	2.07667e-05	6.30225e-05	-5.04	-1.73	-7.39	-7.44	-2.11	-1.56
ENSMUSG00000048126.16	Col6a3	COL6A3	-5.55	2.48	6.75987e-08	2.37902e-06	-0.26	5.25	0.03	-0.62	5.23	5.27
ENSMUSG00000032744.4	Heyl	HEYL	-5.51	-3.87	4.68557e-05	0.00012128	-4.81	-1.05	-7.39	-5.85	-1.01	-1.21
ENSMUSG00000046182.8	Gsg1l	GSG1L	-5.5	-4.66	2.89927e-05	8.24313e-05	-5.04	-1.8	-7.39	-7.44	-2.24	-1.56
ENSMUSG00000035861.6	Tmprss11b	TMPRSS11B	-5.47	-4.68	1.43505e-05	4.71248e-05	-5.04	-1.84	-7.39	-7.44	-1.98	-1.9
ENSMUSG00000051401.7	Kctd16	KCTD16	-5.46	-2.49	2.72762e-05	7.86365e-05	-4.25	0.26	-4.58	-5.85	0.36	0.12
ENSMUSG00000029123.8	Stk32b	STK32B	-5.45	-3.53	0.000162859	0.000341041	-4.62	-0.76	-5.07	-7.44	-0.7	-0.93
ENSMUSG00000028463.14	Car9	CAR9	-5.26	-0.21	7.81382e-07	6.6195e-06	-2.6	2.42	-2.64	-3.05	2.42	2.42
ENSMUSG00000020723.3	Cacng4	CACNG4	-5.26	-1.42	6.65894e-05	0.000161231	-3.49	1.23	-5.07	-3.05	1.06	1.37
ENSMUSG00000035799.6	Twist1	TWIST1	-5.21	-1.28	1.54511e-05	5.00152e-05	-3.42	1.34	-4.22	-3.53	1.55	1.09
ENSMUSG00000000120.6	Ngfr	NGFR	-5.16	-2.65	0.000124699	0.000271246	-4.25	-0.05	-4.58	-5.85	0.29	-0.45
ENSMUSG00000020893.17	Per1	PER1	-5.15	5.08	6.91365e-10	1.58936e-06	2.51	7.65	2.6	2.42	7.63	7.68
ENSMUSG00000028528.16	Dnajc6	DNAJC6	-5.15	-3.68	0.000208225	0.000421142	-4.63	-1.04	-7.39	-5.12	-1.2	-1
ENSMUSG00000019929.16	Dcn	DCN	-5.13	-2.65	6.21309e-05	0.000152285	-4.25	-0.04	-5.81	-4.63	-0.32	0.18
ENSMUSG00000061524.8	Zic2	ZIC2	-5.13	-4.06	9.02483e-05	0.000207101	-4.8	-1.42	-5.81	-7.44	-1.42	-1.56
ENSMUSG00000054675.5	Tmem119	TMEM119	-5.12	-4.07	0.000242478	0.000480065	-4.81	-1.44	-7.39	-5.85	-1.01	-2.03
ENSMUSG00000026413.12	Pkp1	PKP1	-5.1	3.24	5.59221e-09	1.58936e-06	0.7	5.79	0.78	0.59	5.76	5.82
ENSMUSG00000038248.8	Sobp	SOBP	-5.09	-4.07	8.19997e-05	0.000191388	-4.81	-1.45	-7.39	-5.85	-1.58	-1.47
ENSMUSG00000024014.8	Pim1	PIM1	-4.99	6.2	1.40116e-10	1.58936e-06	3.7	8.69	3.72	3.69	8.7	8.68
ENSMUSG00000041954.18	Tnfrsf18	TNFRSF18	-4.99	-4.13	0.000119956	0.000263008	-4.8	-1.55	-5.81	-7.44	-1.5	-1.78
ENSMUSG00000020889.11	Nr1d1	NR1D1	-4.97	3.61	1.22181e-08	1.58936e-06	1.15	6.09	1.34	0.92	6.09	6.1
ENSMUSG00000039853.18	Trim14	TRIM14	-4.97	-3.54	0.000802377	0.00137344	-4.49	-1	-7.39	-4.63	-0.65	-1.47
ENSMUSG00000028972.11	Car6	CAR6	-4.96	-0.85	3.03417e-06	1.55028e-05	-3.01	1.64	-3.3	-3.35	1.52	1.75
ENSMUSG00000005125.13	Ndrg1	NDRG1	-4.93	8.71	1.35121e-07	3.00526e-06	6.25	11.18	5.95	6.54	11.18	11.18
ENSMUSG00000050860.6	Phospho1	PHOSPHO1	-4.9	3.17	8.82874e-09	1.58936e-06	0.74	5.62	0.58	0.86	5.63	5.62
ENSMUSG00000036964.14	Trim17	TRIM17	-4.9	-3.78	0.000678967	0.0011848	-4.62	-1.27	-7.39	-5.04	-0.86	-1.83
ENSMUSG00000028600.15	Podn	PODN	-4.88	-3.02	3.68914e-05	0.000100195	-4.39	-0.53	-5.81	-5.12	-0.75	-0.4
ENSMUSG00000017417.14	Plxdc1	PLXDC1	-4.79	-0.86	2.10147e-06	1.21785e-05	-2.94	1.55	-3.14	-3.35	1.55	1.53
ENSMUSG00000032238.17	Rora	RORA	-4.77	2.33	2.67876e-08	1.86806e-06	-0.02	4.71	-0.06	-0.06	4.67	4.76
ENSMUSG00000052135.8	Foxo6	FOXO6	-4.76	1.11	5.53712e-07	5.55318e-06	-1.18	3.49	-1.2	-1.33	3.61	3.37
ENSMUSG00000036770.11	Stpg3	STPG3	-4.73	-3.65	0.000776421	0.0013341	-4.48	-1.21	-4.58	-7.44	-1.34	-1.21
ENSMUSG00000021831.9	Ero1l	ERO1L	-4.71	9.51	3.21027e-08	1.92224e-06	7.16	11.86	6.95	7.36	11.87	11.85
ENSMUSG00000028943.18	Espn	ESPN	-4.7	1.7	6.0645e-08	2.26838e-06	-0.6	4.05	-0.73	-0.57	4.04	4.07
ENSMUSG00000023959.9	Clic5	CLIC5	-4.7	-3.12	4.57167e-05	0.000119043	-4.39	-0.72	-5.81	-5.12	-0.61	-0.93
ENSMUSG00000031825.16	Crispld2	CRISPLD2	-4.69	-1.53	1.35663e-05	4.51157e-05	-3.42	0.84	-4.22	-3.53	0.68	0.96
ENSMUSG00000043460.7	Elfn2	ELFN2	-4.69	-3.12	3.75313e-05	0.00010156	-4.39	-0.73	-5.81	-5.12	-0.85	-0.69
ENSMUSG00000090125.3	Pou3f1	POU3F1	-4.69	-2.42	0.000176746	0.00036608	-3.94	-0.04	-5.81	-3.74	-0.12	-0.01
ENSMUSG00000019852.7	Arfgef3	ARFGEF3	-4.66	-1.03	1.30159e-05	4.37252e-05	-3.02	1.31	-3.93	-2.8	1.31	1.28
ENSMUSG00000047822.8	Angptl8	ANGPTL8	-4.64	2.51	2.11393e-08	1.79455e-06	0.22	4.84	0.09	0.28	4.8	4.86
ENSMUSG00000034845.6	Plvap	PLVAP	-4.62	-1.05	1.97522e-05	6.06764e-05	-3.02	1.27	-3.93	-2.8	1.39	1.12
ENSMUSG00000000392.17	Fap	FAP	-4.61	-3.7	0.000941316	0.00158365	-4.48	-1.32	-4.58	-7.44	-1.5	-1.29
ENSMUSG00000047591.5	Mafa	MAFA	-4.56	-0.96	1.28381e-05	4.33247e-05	-2.93	1.34	-3.69	-2.8	1.2	1.47
ENSMUSG00000023443.13	Esx1	ESX1	-4.55	-4.35	0.000198096	0.000404103	-4.81	-1.97	-7.39	-5.85	-1.98	-2.17
ENSMUSG00000038151.13	Prdm1	PRDM1	-4.54	1.73	6.1935e-07	5.83322e-06	-0.48	4	-0.17	-0.9	3.94	4.06
ENSMUSG00000020788.15	Atp2a3	ATP2A3	-4.54	-2.82	2.87257e-05	8.18019e-05	-4.21	-0.5	-5.07	-5.12	-0.61	-0.49
ENSMUSG00000032332.17	Col12a1	COL12A1	-4.52	6.04	3.22086e-10	1.58936e-06	3.79	8.3	3.83	3.74	8.29	8.31
ENSMUSG00000036938.17	Try5	TRY5	-4.52	-3.75	0.000933841	0.00157213	-4.49	-1.42	-7.39	-4.63	-1.42	-1.56
ENSMUSG00000004961.7	Syt5	SYT5	-4.51	-2.41	3.05661e-05	8.58555e-05	-3.96	-0.12	-5.07	-4.27	-0.15	-0.16
ENSMUSG00000067276.5	Capn6	CAPN6	-4.49	2.13	4.86918e-07	5.14519e-06	-0.08	4.38	-0.5	0.27	4.42	4.33
ENSMUSG00000090891.3	D6Ertd527e	D6ERTD527E	-4.49	-2.65	0.000176634	0.000365907	-4.04	-0.36	-5.81	-3.98	-0.44	-0.36
ENSMUSG00000030785.8	Cox6a2	COX6A2	-4.48	-3.22	8.62187e-05	0.000199457	-4.39	-0.92	-5.07	-5.85	-1.2	-0.75
ENSMUSG00000052316.9	Lrrc15	LRRC15	-4.47	-2.43	4.19582e-05	0.000110982	-3.96	-0.16	-5.07	-4.27	-0.32	-0.05
ENSMUSG00000027750.16	Postn	POSTN	-4.45	2.5	2.61027e-08	1.86806e-06	0.3	4.73	0.27	0.28	4.68	4.78
ENSMUSG00000021070.6	Bdkrb2	BDKRB2	-4.42	0.98	2.32739e-07	3.71408e-06	-1.15	3.2	-1.16	-1.29	3.16	3.22
ENSMUSG00000046259.2	Sprr2h	SPRR2H	-4.39	0.44	7.42047e-07	6.43415e-06	-1.64	2.63	-1.56	-1.95	2.65	2.61
ENSMUSG00000024621.16	Csf1r	CSF1R	-4.35	-0.96	8.05826e-06	3.06715e-05	-2.86	1.23	-3.48	-2.8	1.28	1.14
ENSMUSG00000040258.6	Nxph4	NXPH4	-4.34	-4.09	0.000927343	0.00156307	-4.62	-1.82	-5.07	-7.44	-1.67	-2.17
ENSMUSG00000034762.9	Glis1	GLIS1	-4.3	0.54	2.39156e-06	1.32229e-05	-1.52	2.7	-1.78	-1.46	2.54	2.84
ENSMUSG00000098387.2	Pet117	PET117	-4.3	-0.45	5.88127e-05	0.000145715	-2.36	1.7	-1.71	-3.47	1.68	1.71
ENSMUSG00000110622.1	Iqcn	IQCN	-4.29	-2.28	2.56188e-05	7.48197e-05	-3.81	-0.1	-4.22	-4.63	-0.22	-0.05
ENSMUSG00000030103.11	Bhlhe40	BHLHE40	-4.27	7.94	1.63056e-09	1.58936e-06	5.8	10.07	5.72	5.89	10.07	10.08
ENSMUSG00000037962.7	Rflna	RFLNA	-4.22	-1.22	7.75625e-06	2.99384e-05	-3.02	0.9	-3.48	-3.19	0.81	0.98
ENSMUSG00000045087.8	S1pr5	S1PR5	-4.22	-3.36	8.59633e-05	0.000198903	-4.39	-1.19	-5.07	-5.85	-1.2	-1.29
ENSMUSG00000026193.15	Fn1	FN1	-4.19	9.74	1.2951e-08	1.58936e-06	7.64	11.83	7.79	7.5	11.82	11.84
ENSMUSG00000074652.3	Myh7b	MYH7B	-4.18	-2.81	0.000334813	0.000632952	-4.03	-0.68	-3.93	-5.85	-0.7	-0.75
ENSMUSG00000032172.8	Olfm2	OLFM2	-4.17	-2.32	0.000119991	0.000263008	-3.77	-0.21	-3.69	-5.12	-0.32	-0.16
ENSMUSG00000039628.9	Hs3st6	HS3ST6	-4.17	-2.5	0.000822852	0.00140419	-3.8	-0.38	-5.81	-3.35	-0.19	-0.64
ENSMUSG00000020256.14	Aldh1l2	ALDH1L2	-4.11	5.75	1.37821e-08	1.58936e-06	3.7	7.81	3.52	3.87	7.8	7.82
ENSMUSG00000041161.8	Otud3	OTUD3	-4.09	4.3	2.68487e-09	1.58936e-06	2.26	6.34	2.33	2.17	6.34	6.34
ENSMUSG00000074001.3	Klhl40	KLHL40	-3.98	-0.56	6.38045e-06	2.60864e-05	-2.35	1.44	-2.87	-2.23	1.43	1.44
ENSMUSG00000030790.15	Adm	ADM	-3.96	0.59	7.39478e-07	6.43287e-06	-1.31	2.57	-1.37	-1.42	2.51	2.62
ENSMUSG00000069171.14	Nr2f1	NR2F1	-3.96	-0.38	4.4989e-06	2.03061e-05	-2.19	1.61	-2.64	-2.08	1.61	1.59
ENSMUSG00000042436.12	Mfap4	MFAP4	-3.94	-4.04	0.0024513	0.00373627	-4.49	-1.95	-7.39	-4.63	-2.24	-1.9
ENSMUSG00000091971.3	Hspa1a	HSPA1A	-3.93	3.85	1.05078e-08	1.58936e-06	1.9	5.82	2.02	1.76	5.81	5.83
ENSMUSG00000045667.14	Smtnl2	SMTNL2	-3.93	4.83	4.0092e-08	2.08147e-06	2.87	6.8	2.64	3.08	6.81	6.78
ENSMUSG00000020681.14	Ace	ACE	-3.92	2.68	5.76293e-07	5.63467e-06	0.74	4.64	0.38	1.05	4.57	4.72
ENSMUSG00000025432.11	Avil	AVIL	-3.92	-0.6	4.17604e-06	1.92569e-05	-2.37	1.38	-2.64	-2.49	1.3	1.43
ENSMUSG00000005413.8	Hmox1	HMOX1	-3.9	6.59	4.82555e-09	1.58936e-06	4.64	8.54	4.52	4.76	8.54	8.53
ENSMUSG00000040280.10	Ndufa4l2	NDUFA4L2	-3.87	-4.08	0.00291113	0.0043589	-4.48	-2.02	-4.58	-7.44	-2.11	-2.17
ENSMUSG00000038067.2	Csf3	CSF3	-3.87	-4.07	0.00295301	0.00441371	-4.48	-2.01	-4.58	-7.44	-2.24	-2.03
ENSMUSG00000029151.14	Slc30a3	SLC30A3	-3.85	-1.25	1.21212e-05	4.14216e-05	-2.88	0.7	-3.14	-3.19	0.79	0.57
ENSMUSG00000026255.15	Efhd1	EFHD1	-3.84	-2.93	8.66089e-05	0.000200212	-4.07	-0.94	-5.07	-4.63	-1.07	-0.93
ENSMUSG00000041642.18	Kif21b	KIF21B	-3.83	6.69	1.45144e-08	1.58936e-06	4.78	8.61	4.92	4.62	8.61	8.6
ENSMUSG00000029231.15	Pdgfra	PDGFRA	-3.81	1.38	1.96263e-07	3.46814e-06	-0.47	3.29	-0.52	-0.52	3.31	3.27
ENSMUSG00000015957.12	Wnt11	WNT11	-3.8	0.83	9.17278e-07	7.27109e-06	-1	2.74	-1.05	-1.1	2.64	2.83
ENSMUSG00000024922.2	Ovol1	OVOL1	-3.79	-3.14	0.000406709	0.000750241	-4.13	-1.19	-5.81	-4.27	-1.2	-1.29
ENSMUSG00000038242.12	Aox4	AOX4	-3.78	-2.52	0.000288764	0.000557472	-3.77	-0.59	-5.07	-3.74	-0.4	-0.87
ENSMUSG00000024338.15	Psmb8	PSMB8	-3.78	-3.33	0.000277749	0.000539774	-4.25	-1.36	-5.81	-4.63	-1.5	-1.38
ENSMUSG00000028747.10	Htr6	HTR6	-3.76	0.72	3.01705e-06	1.54467e-05	-1.09	2.61	-1.37	-0.96	2.47	2.74
ENSMUSG00000027833.16	Shox2	SHOX2	-3.74	-3.7	0.00836236	0.0114226	-4.17	-1.73	-3.69	-7.44	-1.87	-1.78
ENSMUSG00000034522.10	Zfp395	ZFP395	-3.71	4.12	3.63898e-09	1.58936e-06	2.27	5.97	2.32	2.21	5.98	5.97
ENSMUSG00000089739.2	Gm20431	GM20431	-3.71	3.91	2.69359e-07	3.88028e-06	2.05	5.77	1.76	2.33	5.69	5.84
ENSMUSG00000022096.14	Hr	HR	-3.69	-0.03	3.22631e-06	1.61689e-05	-1.75	1.82	-1.66	-2.08	1.83	1.79
ENSMUSG00000055493.4	Epm2a	EPM2A	-3.69	1.4	6.5252e-06	2.64887e-05	-0.4	3.25	-0.95	0.06	3.3	3.2
ENSMUSG00000054136.6	Adm2	ADM2	-3.69	-0.6	2.645e-05	7.66238e-05	-2.25	1.25	-1.97	-2.92	1.34	1.14
ENSMUSG00000028339.17	Col15a1	COL15A1	-3.69	-1.9	0.000289188	0.000558206	-3.29	-0.02	-4.58	-2.92	-0.15	0.05
ENSMUSG00000037686.6	Aspg	ASPG	-3.68	-3.01	0.000122671	0.000267809	-4.08	-1.11	-4.58	-5.12	-1.14	-1.21
ENSMUSG00000038201.10	Kcna7	KCNA7	-3.68	-4	0.00020258	0.000411847	-4.57	-2.04	-5.81	-5.85	-1.98	-2.34
ENSMUSG00000028645.11	Slc2a1	SLC2A1	-3.67	8.38	3.03904e-08	1.91872e-06	6.54	10.21	6.39	6.7	10.21	10.21
ENSMUSG00000074277.4	Phldb3	PHLDB3	-3.67	1.98	9.33412e-08	2.64794e-06	0.18	3.83	0.14	0.15	3.79	3.86
ENSMUSG00000029797.13	Sspo	SSPO	-3.65	-3.55	0.0118245	0.0157459	-4.04	-1.62	-7.39	-3.35	-1.77	-1.67
ENSMUSG00000031530.6	Dusp4	DUSP4	-3.61	4.8	2.86418e-09	1.58936e-06	3	6.6	2.99	2.99	6.55	6.65
ENSMUSG00000025665.16	Rps6ka6	RPS6KA6	-3.61	1.32	3.1344e-06	1.58537e-05	-0.44	3.12	-0.88	-0.09	3.09	3.16
ENSMUSG00000020599.13	Rgs9	RGS9	-3.61	-2.78	0.00231831	0.00355167	-3.8	-0.92	-5.81	-3.35	-0.65	-1.29
ENSMUSG00000032515.8	Csrnp1	CSRNP1	-3.59	4.45	3.52328e-09	1.58936e-06	2.67	6.25	2.7	2.62	6.21	6.28
ENSMUSG00000003051.13	Elf3	ELF3	-3.58	3.26	2.31042e-07	3.7079e-06	1.48	5.05	1.21	1.72	5	5.1
ENSMUSG00000061186.15	Sfmbt2	SFMBT2	-3.57	-0.71	1.61622e-05	5.17092e-05	-2.3	1.09	-2.18	-2.8	1.17	0.98
ENSMUSG00000022489.6	Pde1b	PDE1B	-3.56	-3.31	0.000189114	0.000388494	-4.21	-1.45	-5.07	-5.12	-1.67	-1.38
ENSMUSG00000022237.17	Ankrd33b	ANKRD33B	-3.55	-2.39	0.000179196	0.000370421	-3.62	-0.58	-3.69	-4.63	-0.44	-0.81
ENSMUSG00000043165.7	Lor	LOR	-3.54	-1.06	1.83308e-05	5.69435e-05	-2.6	0.74	-2.87	-2.8	0.57	0.87
ENSMUSG00000070576.4	Mn1	MN1	-3.53	2.31	8.59688e-08	2.56307e-06	0.57	4.08	0.44	0.66	4.08	4.07
ENSMUSG00000031290.14	Lrch2	LRCH2	-3.53	0.16	7.14879e-06	2.83246e-05	-1.5	1.94	-1.97	-1.25	1.91	1.96
ENSMUSG00000024210.3	Ip6k3	IP6K3	-3.53	-1.73	0.000121189	0.000265238	-3.16	0.07	-3.48	-3.53	-0.29	0.37
ENSMUSG00000039126.10	Prune2	PRUNE2	-3.52	2.67	9.88428e-07	7.56145e-06	0.93	4.43	1.26	0.55	4.41	4.44
ENSMUSG00000022707.16	Gbe1	GBE1	-3.51	5.61	3.8662e-08	2.04958e-06	3.86	7.37	3.67	4.03	7.38	7.35
ENSMUSG00000056174.8	Col8a2	COL8A2	-3.51	-1.38	3.58158e-05	9.78451e-05	-2.86	0.4	-3.48	-2.8	0.43	0.32
ENSMUSG00000037428.14	Vgf	VGF	-3.5	-1.51	0.000477572	0.000866832	-2.91	0.26	-4.22	-2.31	0.24	0.24
ENSMUSG00000034472.13	Rasd2	RASD2	-3.48	-2.92	0.00186079	0.0029111	-3.86	-1.1	-5.81	-3.53	-1.34	-1
ENSMUSG00000040249.15	Lrp1	LRP1	-3.47	8.09	1.23611e-07	2.96241e-06	6.36	9.82	6.55	6.15	9.8	9.84
ENSMUSG00000036427.5	Gpi1	GPI1	-3.46	10.33	6.08124e-08	2.26838e-06	8.6	12.06	8.44	8.76	12.05	12.07
ENSMUSG00000004951.10	Hspb1	HSPB1	-3.46	-2.94	0.000286966	0.000554768	-3.96	-1.16	-5.07	-4.27	-1.01	-1.43
ENSMUSG00000032356.12	Rasgrf1	RASGRF1	-3.45	-2.55	0.00014984	0.0003172	-3.7	-0.78	-3.93	-4.63	-0.96	-0.69
ENSMUSG00000017314.12	Mpp2	MPP2	-3.43	3.84	6.76723e-09	1.58936e-06	2.13	5.55	2.1	2.14	5.58	5.53
ENSMUSG00000036698.11	Ago2	AGO2	-3.43	6.81	2.66015e-08	1.86806e-06	5.09	8.52	5.24	4.94	8.51	8.53
ENSMUSG00000035969.15	Rusc2	RUSC2	-3.42	4.8	4.44789e-08	2.13688e-06	3.09	6.5	3.27	2.91	6.52	6.49
ENSMUSG00000029093.14	Sorcs2	SORCS2	-3.4	4.68	4.53649e-09	1.58936e-06	2.99	6.38	3.05	2.9	6.38	6.38
ENSMUSG00000047414.6	Flrt2	FLRT2	-3.4	-1.87	0.000135881	0.00029173	-3.19	-0.14	-3.93	-3.19	0.06	-0.4
ENSMUSG00000055691.5	Gja6	GJA6	-3.39	-1.16	6.60495e-05	0.000160171	-2.6	0.55	-2.35	-3.35	0.57	0.5
ENSMUSG00000042650.3	Alkbh5	ALKBH5	-3.37	7.87	7.10648e-09	1.58936e-06	6.18	9.55	6.09	6.27	9.55	9.55
ENSMUSG00000018774.13	Cd68	CD68	-3.37	2.7	8.26362e-08	2.51877e-06	1.03	4.38	1.15	0.88	4.37	4.4
ENSMUSG00000098557.1	Kctd12	KCTD12	-3.37	1.02	6.32176e-07	5.90092e-06	-0.6	2.71	-0.6	-0.73	2.71	2.7
ENSMUSG00000048583.16	Igf2	IGF2	-3.37	-0.15	3.31023e-05	9.1668e-05	-1.71	1.54	-2.35	-1.33	1.6	1.47
ENSMUSG00000052131.7	Akr1b7	AKR1B7	-3.37	-1.88	0.000242399	0.000479985	-3.17	-0.15	-4.22	-2.92	-0.29	-0.08
ENSMUSG00000031740.8	Mmp2	MMP2	-3.36	3.91	2.70018e-08	1.86806e-06	2.23	5.59	2.09	2.37	5.59	5.6
ENSMUSG00000015312.9	Gadd45b	GADD45B	-3.35	7.32	1.82064e-09	1.58936e-06	5.64	9	5.6	5.69	8.98	9.01
ENSMUSG00000052336.7	Cx3cr1	CX3CR1	-3.35	-0.7	8.92161e-05	0.00020522	-2.2	0.99	-3	-1.77	0.92	1.03
ENSMUSG00000116069.1	Gm49510	GM49510	-3.35	-3.36	0.0389596	0.0478483	-3.75	-1.6	-7.39	-2.67	-1.01	-2.36
ENSMUSG00000024395.9	Lims2	LIMS2	-3.33	-2.31	0.000462378	0.000841321	-3.46	-0.61	-3.3	-4.63	-0.44	-0.87
ENSMUSG00000059146.12	Ntrk3	NTRK3	-3.33	-2.84	0.0050972	0.00725186	-3.86	-1.08	-5.07	-3.98	-1.98	-0.31
ENSMUSG00000024164.15	C3	C3	-3.32	2.5	5.9498e-07	5.7347e-06	0.86	4.17	0.56	1.11	4.16	4.17
ENSMUSG00000051067.8	Lingo3	LINGO3	-3.32	-0.52	1.72689e-05	5.44595e-05	-2.03	1.15	-2.35	-2.01	1.28	0.98
ENSMUSG00000028602.12	Tnfrsf8	TNFRSF8	-3.32	-2.23	0.000483634	0.000875306	-3.4	-0.53	-3.14	-4.63	-0.7	-0.45
ENSMUSG00000045382.6	Cxcr4	CXCR4	-3.31	-2.64	0.000492917	0.000889929	-3.71	-0.94	-4.58	-3.98	-0.61	-1.38
ENSMUSG00000058447.8	Gm26920	GM26920	-3.31	-3.08	0.0918632	0.106779	-3.48	-1.3	-2.07	-7.44	-2.76	-0.06
ENSMUSG00000097148.2	Gm3839	GM3839	-3.3	1.95	7.30271e-06	2.87171e-05	0.32	3.6	0.28	0.3	3.36	3.85
ENSMUSG00000056148.8	Rdh9	RDH9	-3.28	-2.65	0.000188979	0.00038828	-3.7	-0.96	-3.93	-4.63	-0.96	-1.07
ENSMUSG00000008193.13	Spib	SPIB	-3.28	-2.3	0.000409656	0.000754901	-3.49	-0.6	-3.93	-3.98	-1.07	-0.23
ENSMUSG00000027470.9	Mylk2	MYLK2	-3.27	-2.08	0.000222589	0.0004461	-3.29	-0.4	-3.14	-4.27	-0.4	-0.49
ENSMUSG00000036545.8	Adamts2	ADAMTS2	-3.27	-2.97	0.000296394	0.000569402	-3.93	-1.25	-4.58	-4.63	-1.58	-1.07
ENSMUSG00000041559.7	Fmod	FMOD	-3.27	-2.47	0.000359501	0.000673642	-3.59	-0.8	-3.93	-4.27	-0.48	-1.21
ENSMUSG00000027797.15	Dclk1	DCLK1	-3.26	4.97	8.81721e-09	1.58936e-06	3.34	6.6	3.24	3.44	6.58	6.62
ENSMUSG00000028364.15	Tnc	TNC	-3.26	5.84	9.76694e-09	1.58936e-06	4.21	7.47	4.31	4.1	7.49	7.45
ENSMUSG00000028909.17	Ptpru	PTPRU	-3.26	-1.36	0.000118839	0.00026094	-2.71	0.29	-2.44	-3.53	0.27	0.26
ENSMUSG00000057666.18	Gapdh	GAPDH	-3.25	12.45	7.86575e-08	2.45224e-06	10.82	14.07	10.68	10.96	14.07	14.07
ENSMUSG00000020241.13	Col6a2	COL6A2	-3.23	4.16	9.57912e-09	1.58936e-06	2.55	5.78	2.5	2.58	5.73	5.82
ENSMUSG00000031596.15	Slc7a2	SLC7A2	-3.23	3.67	1.33367e-08	1.58936e-06	2.06	5.29	2.01	2.09	5.32	5.25
ENSMUSG00000029287.14	Tgfbr3	TGFBR3	-3.22	3.69	1.51312e-08	1.58936e-06	2.08	5.3	2	2.15	5.28	5.32
ENSMUSG00000028801.14	Stpg1	STPG1	-3.22	-3.06	0.000370293	0.000691595	-3.96	-1.38	-5.07	-4.27	-1.34	-1.56
ENSMUSG00000038967.13	Pdk2	PDK2	-3.21	2.12	1.16416e-07	2.86811e-06	0.54	3.73	0.56	0.47	3.72	3.74
ENSMUSG00000039831.16	Arhgap29	ARHGAP29	-3.21	1.92	4.99418e-07	5.22021e-06	0.35	3.53	0.37	0.27	3.63	3.42
ENSMUSG00000005045.16	Chd5	CHD5	-3.2	0.31	2.44595e-06	1.3449e-05	-1.21	1.92	-1.33	-1.25	1.89	1.93
ENSMUSG00000001555.10	Fkbp10	FKBP10	-3.2	0.28	7.15929e-06	2.8348e-05	-1.23	1.9	-1.61	-1.03	1.87	1.9
ENSMUSG00000005686.17	Ampd3	AMPD3	-3.19	1.79	3.7561e-07	4.45624e-06	0.22	3.39	0.06	0.33	3.41	3.36
ENSMUSG00000056501.3	Cebpb	CEBPB	-3.18	6.07	7.37568e-09	1.58936e-06	4.48	7.66	4.56	4.4	7.7	7.62
ENSMUSG00000033948.3	Zswim5	ZSWIM5	-3.18	-2.57	0.000245899	0.000485995	-3.62	-0.92	-4.58	-3.74	-1.01	-0.93
ENSMUSG00000018707.13	Dync1h1	DYNC1H1	-3.17	8.32	2.8584e-08	1.90016e-06	6.74	9.91	6.86	6.61	9.9	9.91
ENSMUSG00000044071.8	Tafa2	TAFA2	-3.17	-1.78	0.000210135	0.000424528	-3.02	-0.16	-3.93	-2.8	-0.19	-0.19
ENSMUSG00000029992.14	Gfpt1	GFPT1	-3.16	6.7	4.53781e-09	1.58936e-06	5.12	8.27	5.04	5.19	8.28	8.27
ENSMUSG00000060961.15	Slc4a4	SLC4A4	-3.16	4.7	1.48318e-08	1.58936e-06	3.12	6.28	3.01	3.23	6.28	6.28
ENSMUSG00000035828.11	Pim3	PIM3	-3.15	6.93	2.51807e-09	1.58936e-06	5.36	8.5	5.4	5.31	8.49	8.52
ENSMUSG00000062382.9	Ftl1-ps1	FTL1-PS1	-3.14	8.7	5.33553e-09	1.58936e-06	7.13	10.27	7.13	7.13	10.2	10.33
ENSMUSG00000038576.15	Susd4	SUSD4	-3.14	1.14	1.48731e-05	4.84987e-05	-0.38	2.71	-0.82	-0.04	2.84	2.56
ENSMUSG00000020331.9	Hcn2	HCN2	-3.14	-0.31	1.51535e-05	4.91326e-05	-1.75	1.27	-2.11	-1.66	1.35	1.15
ENSMUSG00000027978.9	Prss12	PRSS12	-3.14	-1.1	2.36034e-05	7.00576e-05	-2.46	0.49	-2.53	-2.8	0.47	0.47
ENSMUSG00000090996.1	Gm20458	GM20458	-3.13	0.14	0.0294348	0.036776	-1.27	1.67	-0.18	-2.59	2.84	0.49
ENSMUSG00000003316.14	Glg1	GLG1	-3.11	6.58	1.47891e-09	1.58936e-06	5.02	8.13	5.01	5.03	8.13	8.13
ENSMUSG00000001288.15	Rarg	RARG	-3.11	5.43	2.383e-09	1.58936e-06	3.87	6.99	3.84	3.9	6.98	6.99
ENSMUSG00000042988.10	Notum	NOTUM	-3.11	-0.57	9.88563e-05	0.000223056	-1.97	0.99	-1.56	-2.69	1.05	0.91
ENSMUSG00000028758.12	Kif17	KIF17	-3.11	-2.98	0.000869863	0.00147529	-3.85	-1.36	-3.93	-5.12	-1.2	-1.67
ENSMUSG00000024042.7	Sik1	SIK1	-3.1	5.37	1.00754e-08	1.58936e-06	3.82	6.92	3.91	3.72	6.92	6.91
ENSMUSG00000037012.18	Hk1	HK1	-3.1	7.03	8.33137e-08	2.5223e-06	5.48	8.58	5.31	5.65	8.58	8.58
ENSMUSG00000020611.14	Gna13	GNA13	-3.08	6.87	2.23829e-09	1.58936e-06	5.33	8.41	5.29	5.36	8.42	8.4
ENSMUSG00000050708.16	Ftl1	FTL1	-3.08	12.33	1.65404e-08	1.61033e-06	10.79	13.87	10.74	10.83	13.84	13.89
ENSMUSG00000030406.7	Gipr	GIPR	-3.08	-1.46	0.000130842	0.000282757	-2.73	0.1	-2.64	-3.35	0.27	-0.12
ENSMUSG00000033192.5	Lpcat2	LPCAT2	-3.08	-2.46	0.00432726	0.00625131	-3.44	-0.88	-5.07	-2.92	-0.48	-1.38
ENSMUSG00000001119.7	Col6a1	COL6A1	-3.07	7.03	2.18655e-09	1.58936e-06	5.5	8.57	5.47	5.53	8.57	8.56
ENSMUSG00000025579.14	Gaa	GAA	-3.07	6.16	4.25072e-09	1.58936e-06	4.62	7.69	4.57	4.68	7.66	7.72
ENSMUSG00000001156.9	Mxd1	MXD1	-3.07	3.91	8.52387e-09	1.58936e-06	2.38	5.45	2.4	2.36	5.44	5.46
ENSMUSG00000058571.11	Gpc6	GPC6	-3.07	4.22	1.03209e-08	1.58936e-06	2.69	5.76	2.76	2.62	5.75	5.77
ENSMUSG00000034994.10	Eef2	EEF2	-3.07	11.89	4.67762e-08	2.14675e-06	10.36	13.43	10.25	10.47	13.41	13.44
ENSMUSG00000049502.17	Dtx3l	DTX3L	-3.07	1.77	1.04186e-06	7.78701e-06	0.26	3.32	0.04	0.42	3.24	3.38
ENSMUSG00000020950.10	Foxg1	FOXG1	-3.06	0.13	1.77813e-05	5.56287e-05	-1.3	1.67	-1.03	-1.77	1.67	1.65
ENSMUSG00000109372.1	Gm19410	GM19410	-3.05	-2.96	0.0138672	0.0182303	-3.72	-1.34	-3.14	-5.85	-2.11	-0.75
ENSMUSG00000041040.12	Fam117b	FAM117B	-3.04	6.31	2.67241e-08	1.86806e-06	4.79	7.83	4.66	4.91	7.82	7.83
ENSMUSG00000028664.14	Ephb2	EPHB2	-3.04	1.45	3.21428e-06	1.61279e-05	-0.04	2.98	-0.38	0.23	2.95	2.99
ENSMUSG00000003545.3	Fosb	FOSB	-3.04	0.55	8.98663e-06	3.33062e-05	-0.9	2.07	-0.65	-1.29	2.08	2.04
ENSMUSG00000001506.10	Col1a1	COL1A1	-3.03	4.9	3.33429e-08	1.94883e-06	3.4	6.42	3.52	3.26	6.37	6.46
ENSMUSG00000037960.11	Card19	CARD19	-3.02	5.47	1.06998e-08	1.58936e-06	3.96	6.97	3.87	4.05	6.96	6.99
ENSMUSG00000027333.18	Smox	SMOX	-3.02	5.56	1.25778e-08	1.58936e-06	4.05	7.08	3.95	4.15	7.07	7.09
ENSMUSG00000026773.19	Pfkfb3	PFKFB3	-3.01	4.52	1.14341e-08	1.58936e-06	3.02	6.02	3.09	2.93	6.02	6.02
ENSMUSG00000023175.15	Bsg	BSG	-3.01	10.86	1.86802e-08	1.6728e-06	9.36	12.36	9.29	9.43	12.37	12.36
ENSMUSG00000022283.15	Pabpc1	PABPC1	-3	8.88	3.4062e-09	1.58936e-06	7.38	10.38	7.38	7.38	10.38	10.38
ENSMUSG00000040146.9	Rgl3	RGL3	-3	1.77	6.4323e-07	5.95033e-06	0.3	3.27	0.16	0.39	3.33	3.2
ENSMUSG00000028763.18	Hspg2	HSPG2	-3	8.19	7.52717e-07	6.46416e-06	6.68	9.69	6.92	6.44	9.68	9.7
ENSMUSG00000029095.17	Ablim2	ABLIM2	-3	-0.46	1.36539e-05	4.53471e-05	-1.83	1.05	-2.11	-1.83	1.08	1
ENSMUSG00000035041.8	Creb3l3	CREB3L3	-3	-3.55	0.00276128	0.00415582	-4.13	-1.94	-4.22	-5.85	-1.77	-2.34
ENSMUSG00000019916.14	P4ha1	P4HA1	-2.99	8.91	2.09395e-07	3.57452e-06	7.42	10.41	7.24	7.6	10.41	10.4
ENSMUSG00000048782.15	Insc	INSC	-2.99	-1.29	5.13413e-05	0.000130393	-2.56	0.23	-3	-2.58	0.14	0.26
ENSMUSG00000027422.15	Rrbp1	RRBP1	-2.98	7.14	3.46123e-09	1.58936e-06	5.64	8.63	5.69	5.6	8.63	8.62
ENSMUSG00000059824.12	Dbp	DBP	-2.98	4.41	8.42511e-09	1.58936e-06	2.92	5.9	2.87	2.97	5.87	5.93
ENSMUSG00000025791.18	Pgm1	PGM1	-2.98	7.15	2.3387e-06	1.3052e-05	5.65	8.64	5.35	5.96	8.63	8.64
ENSMUSG00000023473.13	Celsr3	CELSR3	-2.98	-2.64	0.00425633	0.00615877	-3.54	-1.07	-3.14	-5.12	-1.58	-0.69
ENSMUSG00000024987.6	Cyp26a1	CYP26A1	-2.98	-3.28	0.00510935	0.00726587	-3.94	-1.69	-3.69	-5.85	-2.11	-1.47
ENSMUSG00000062713.8	Sim2	SIM2	-2.96	-1.29	4.13327e-05	0.00010965	-2.55	0.22	-2.75	-2.8	0.11	0.26
ENSMUSG00000017943.15	Gdap1l1	GDAP1L1	-2.96	-3.55	0.00201323	0.003124	-4.13	-1.95	-5.81	-4.27	-2.11	-2.03
ENSMUSG00000031987.6	Egln1	EGLN1	-2.94	7.68	1.28676e-07	2.96241e-06	6.21	9.15	6.05	6.38	9.14	9.16
ENSMUSG00000068874.13	Selenbp1	SELENBP1	-2.94	6.35	1.52623e-06	9.8399e-06	4.88	7.82	4.59	5.16	7.81	7.83
ENSMUSG00000025582.4	Nptx1	NPTX1	-2.94	0.82	2.16849e-06	1.24009e-05	-0.6	2.29	-0.55	-0.75	2.33	2.25
ENSMUSG00000028487.18	Bnc2	BNC2	-2.93	4.66	2.90679e-08	1.91209e-06	3.2	6.12	3.29	3.09	6.07	6.18
ENSMUSG00000031169.13	Porcn	PORCN	-2.93	2.65	7.89097e-08	2.45401e-06	1.19	4.11	1.14	1.23	4.11	4.11
ENSMUSG00000034936.2	Arl4d	ARL4D	-2.92	1.94	5.88131e-07	5.70437e-06	0.5	3.41	0.32	0.64	3.39	3.41
ENSMUSG00000032327.14	Stra6	STRA6	-2.92	-1.5	0.000270546	0.000528305	-2.71	-0.01	-2.75	-3.19	-0.36	0.29
ENSMUSG00000055805.15	Fmnl1	FMNL1	-2.91	1.92	2.90171e-07	4.01037e-06	0.49	3.38	0.5	0.44	3.41	3.34
ENSMUSG00000091455.4	Otogl	OTOGL	-2.91	-2.11	0.000314722	0.000599662	-3.18	-0.62	-3.14	-3.98	-0.52	-0.81
ENSMUSG00000064330.9	Pde6h	PDE6H	-2.91	-2.24	0.00060905	0.00107609	-3.29	-0.73	-4.22	-3.19	-1.01	-0.54
ENSMUSG00000038393.14	Txnip	TXNIP	-2.9	7.92	8.7605e-09	1.58936e-06	6.47	9.37	6.41	6.54	9.37	9.37
ENSMUSG00000021451.16	Sema4d	SEMA4D	-2.9	3.86	1.24358e-08	1.58936e-06	2.42	5.31	2.39	2.43	5.33	5.3
ENSMUSG00000003660.10	Snrnp200	SNRNP200	-2.9	7.46	1.49723e-08	1.58936e-06	6.01	8.91	6.1	5.91	8.9	8.91
ENSMUSG00000024855.10	Pacs1	PACS1	-2.9	4	1.71139e-08	1.62034e-06	2.55	5.45	2.62	2.47	5.45	5.45
ENSMUSG00000015340.10	Cybb	CYBB	-2.9	-2.5	0.000417874	0.000769143	-3.49	-0.99	-3.93	-3.98	-1.34	-0.75
ENSMUSG00000024339.12	Tap2	TAP2	-2.9	-1.59	0.00119107	0.00195387	-2.74	-0.11	-3.93	-2.15	-0.09	-0.19
ENSMUSG00000023982.8	Guca1a	GUCA1A	-2.89	-2.11	0.000313507	0.0005978	-3.18	-0.62	-3.14	-3.98	-0.8	-0.54
ENSMUSG00000024413.14	Npc1	NPC1	-2.88	4.86	7.21324e-09	1.58936e-06	3.42	6.3	3.47	3.37	6.28	6.32
ENSMUSG00000034390.16	Cmip	CMIP	-2.87	4.32	3.5952e-07	4.38877e-06	2.9	5.75	3.12	2.66	5.75	5.75
ENSMUSG00000021140.9	Pcnx	PCNX	-2.85	5.21	1.29469e-08	1.58936e-06	3.79	6.62	3.87	3.7	6.64	6.61
ENSMUSG00000003865.16	Gys1	GYS1	-2.84	7	8.27964e-08	2.51877e-06	5.57	8.41	5.43	5.72	8.42	8.41
ENSMUSG00000040624.17	Plekhg1	PLEKHG1	-2.84	1.77	1.88852e-06	1.12934e-05	0.38	3.19	0.58	0.12	3.23	3.14
ENSMUSG00000040128.9	Pnrc1	PNRC1	-2.83	7.26	1.62523e-08	1.61033e-06	5.84	8.68	5.76	5.93	8.7	8.65
ENSMUSG00000029361.18	Nos1	NOS1	-2.83	-0.27	1.10732e-05	3.86885e-05	-1.58	1.15	-1.66	-1.71	1.12	1.17
ENSMUSG00000005514.14	Por	POR	-2.81	6.98	3.5635e-09	1.58936e-06	5.58	8.38	5.55	5.59	8.36	8.41
ENSMUSG00000030256.11	Bhlhe41	BHLHE41	-2.81	3.88	2.38824e-08	1.86806e-06	2.48	5.29	2.53	2.43	5.32	5.24
ENSMUSG00000057265.13	Bbof1	BBOF1	-2.81	0.22	5.65988e-06	2.38467e-05	-1.11	1.64	-1.16	-1.21	1.59	1.66
ENSMUSG00000022367.7	Has2	HAS2	-2.8	3.58	4.37187e-08	2.13688e-06	2.19	4.98	2.27	2.09	5	4.96
ENSMUSG00000035566.7	Pcdh17	PCDH17	-2.8	2.72	8.22036e-08	2.51291e-06	1.34	4.12	1.35	1.29	4.11	4.13
ENSMUSG00000033016.16	Nfatc1	NFATC1	-2.8	2.44	1.41269e-06	9.38284e-06	1.06	3.84	1.3	0.78	3.85	3.82
ENSMUSG00000020424.3	Castor1	CASTOR1	-2.8	1.02	3.65347e-06	1.75736e-05	-0.34	2.43	-0.57	-0.2	2.36	2.48
ENSMUSG00000052353.13	Cemip	CEMIP	-2.8	-3.13	0.00144507	0.00232182	-3.85	-1.65	-3.93	-5.12	-1.58	-1.9
ENSMUSG00000058420.8	Syt17	SYT17	-2.79	3.71	2.19772e-08	1.81603e-06	2.33	5.11	2.27	2.37	5.11	5.1
ENSMUSG00000090877.3	Hspa1b	HSPA1B	-2.79	5.32	2.74613e-08	1.86811e-06	3.93	6.71	4.02	3.84	6.66	6.77
ENSMUSG00000026825.17	Dnm1	DNM1	-2.78	4.25	1.19317e-07	2.89346e-06	2.87	5.64	3.03	2.7	5.62	5.66
ENSMUSG00000078607.5	1810010H24Rik	1810010H24RIK	-2.77	-0.9	0.000129465	0.000280109	-2.12	0.52	-2.64	-1.95	0.31	0.68
ENSMUSG00000068732.5	Tmem167b	TMEM167B	-2.76	5.47	1.70346e-07	3.29773e-06	4.09	6.86	3.91	4.27	6.84	6.87
ENSMUSG00000066036.14	Ubr4	UBR4	-2.76	7.13	2.19158e-07	3.66292e-06	5.75	8.52	5.93	5.58	8.53	8.5
ENSMUSG00000026251.13	Chrnd	CHRND	-2.76	-0.99	8.19905e-05	0.000191388	-2.2	0.42	-2.35	-2.4	0.19	0.61
ENSMUSG00000024897.9	Apba1	APBA1	-2.75	-0.93	0.00013384	0.000288087	-2.14	0.48	-2.53	-2.08	0.22	0.7
ENSMUSG00000022754.6	Tmem45a	TMEM45A	-2.75	-2.5	0.0019657	0.00305771	-3.41	-1.05	-4.58	-3.19	-1.42	-0.81
ENSMUSG00000008855.17	Hdac5	HDAC5	-2.74	6.39	3.71647e-09	1.58936e-06	5.03	7.76	5	5.05	7.76	7.77
ENSMUSG00000050335.17	Lgals3	LGALS3	-2.74	8.98	1.8365e-08	1.67202e-06	7.61	10.35	7.53	7.68	10.35	10.35
ENSMUSG00000069114.8	Zbtb10	ZBTB10	-2.73	4.95	6.42421e-09	1.58936e-06	3.58	6.31	3.6	3.57	6.29	6.34
ENSMUSG00000022105.6	Rb1	RB1	-2.73	3.34	4.14495e-08	2.09989e-06	1.98	4.7	1.99	1.97	4.67	4.74
ENSMUSG00000013921.15	Clip3	CLIP3	-2.73	1.18	2.76565e-06	1.46244e-05	-0.15	2.55	-0.01	-0.36	2.52	2.57
ENSMUSG00000055148.7	Klf2	KLF2	-2.73	0.55	5.12269e-06	2.22319e-05	-0.76	1.92	-0.79	-0.84	2	1.83
ENSMUSG00000032523.11	Hhatl	HHATL	-2.73	-2.47	0.000272932	0.000531893	-3.4	-1.04	-3.69	-3.98	-1.07	-1.14
ENSMUSG00000034413.14	Neurl1b	NEURL1B	-2.72	2.32	5.01698e-07	5.22269e-06	0.97	3.68	1.11	0.8	3.69	3.67
ENSMUSG00000040026.8	Saa3	SAA3	-2.72	-0.3	3.71741e-05	0.000100811	-1.55	1.07	-1.9	-1.42	1.17	0.94
ENSMUSG00000028108.15	Ecm1	ECM1	-2.71	4.19	1.18584e-08	1.58936e-06	2.84	5.54	2.84	2.83	5.56	5.52
ENSMUSG00000042599.8	Kdm7a	KDM7A	-2.71	5.63	8.47827e-08	2.55846e-06	4.28	6.99	4.13	4.42	7	6.98
ENSMUSG00000037712.16	Fermt2	FERMT2	-2.71	7	1.89525e-07	3.43095e-06	5.64	8.35	5.47	5.81	8.35	8.35
ENSMUSG00000013846.10	St3gal1	ST3GAL1	-2.71	2.43	5.13245e-07	5.27693e-06	1.09	3.79	0.93	1.22	3.74	3.83
ENSMUSG00000025020.11	Slit1	SLIT1	-2.71	-2.05	0.00141145	0.00227276	-3.08	-0.64	-3.48	-3.35	-1.2	-0.16
ENSMUSG00000020593.15	Lpin1	LPIN1	-2.7	4.34	1.56861e-08	1.58936e-06	3	5.7	3.03	2.96	5.66	5.73
ENSMUSG00000025404.15	R3hdm2	R3HDM2	-2.7	3.48	3.69935e-08	2.01158e-06	2.14	4.84	2.18	2.08	4.83	4.84
ENSMUSG00000069806.5	Cacng7	CACNG7	-2.7	-0.18	2.82854e-05	8.07494e-05	-1.44	1.18	-1.78	-1.29	1.24	1.09
ENSMUSG00000028328.13	Tmod1	TMOD1	-2.7	-1.85	0.000205558	0.000416908	-2.91	-0.46	-3.48	-2.92	-0.44	-0.56
ENSMUSG00000051495.7	Irf2bp2	IRF2BP2	-2.69	7.46	4.32312e-09	1.58936e-06	6.12	8.8	6.12	6.12	8.82	8.79
ENSMUSG00000042622.14	Maff	MAFF	-2.69	5.47	6.03756e-09	1.58936e-06	4.12	6.81	4.09	4.15	6.79	6.83
ENSMUSG00000000126.11	Wnt9a	WNT9A	-2.69	-0.6	7.355e-05	0.000174751	-1.82	0.76	-1.66	-2.23	0.61	0.89
ENSMUSG00000048264.16	Dip2c	DIP2C	-2.68	5.36	3.15957e-08	1.92224e-06	4.03	6.7	4.13	3.91	6.71	6.69
ENSMUSG00000042821.7	Snai1	SNAI1	-2.68	4.25	4.32652e-08	2.13688e-06	2.91	5.59	3	2.81	5.55	5.63
ENSMUSG00000031503.13	Col4a2	COL4A2	-2.68	4.38	5.55954e-08	2.24969e-06	3.04	5.72	3.16	2.92	5.69	5.75
ENSMUSG00000006205.13	Htra1	HTRA1	-2.68	5.74	3.23235e-07	4.16954e-06	4.4	7.08	4.21	4.6	7.09	7.08
ENSMUSG00000018427.7	Ypel2	YPEL2	-2.68	3.88	5.63243e-07	5.5765e-06	2.55	5.23	2.34	2.75	5.29	5.16
ENSMUSG00000022382.15	Wnt7b	WNT7B	-2.68	1.37	6.94252e-06	2.76819e-05	0.05	2.72	-0.12	0.15	2.55	2.87
ENSMUSG00000024610.15	Cd74	CD74	-2.68	0.28	4.14129e-05	0.00010984	-1	1.62	-1.46	-0.67	1.64	1.59
ENSMUSG00000034341.17	Wbp2	WBP2	-2.67	5.55	8.34913e-09	1.58936e-06	4.21	6.88	4.16	4.27	6.89	6.88
ENSMUSG00000002603.15	Tgfb1	TGFB1	-2.67	4.77	2.24041e-08	1.81603e-06	3.43	6.11	3.35	3.51	6.07	6.14
ENSMUSG00000030123.15	Plxnd1	PLXND1	-2.67	4.83	3.12074e-08	1.92224e-06	3.5	6.16	3.6	3.39	6.18	6.14
ENSMUSG00000019820.11	Utrn	UTRN	-2.67	6.94	4.7366e-08	2.14675e-06	5.61	8.27	5.72	5.49	8.28	8.26
ENSMUSG00000021062.15	Rab15	RAB15	-2.67	0.09	2.86331e-05	8.15936e-05	-1.17	1.44	-1.56	-0.93	1.43	1.43
ENSMUSG00000020850.14	Prpf8	PRPF8	-2.66	8.43	1.03875e-08	1.58936e-06	7.09	9.76	7.14	7.05	9.76	9.76
ENSMUSG00000063410.8	Stk24	STK24	-2.66	7.09	1.828e-08	1.67202e-06	5.76	8.41	5.68	5.84	8.4	8.43
ENSMUSG00000047604.3	Frat2	FRAT2	-2.66	3.49	7.11002e-08	2.40527e-06	2.17	4.82	2.09	2.23	4.87	4.77
ENSMUSG00000109336.1	Samd4b	SAMD4B	-2.66	4.58	1.17794e-07	2.8793e-06	3.26	5.92	3.41	3.1	5.92	5.91
ENSMUSG00000040734.14	Ppp1r13l	PPP1R13L	-2.66	3.1	6.93917e-07	6.1833e-06	1.79	4.42	1.98	1.57	4.38	4.47
ENSMUSG00000020312.12	Shc2	SHC2	-2.66	1.51	1.04394e-06	7.78774e-06	0.21	2.85	0.27	0.09	2.83	2.86
ENSMUSG00000071324.11	Armc2	ARMC2	-2.66	-2.83	0.000967399	0.00162275	-3.62	-1.43	-4.58	-3.74	-1.34	-1.67
ENSMUSG00000037217.15	Syn1	SYN1	-2.66	-3.1	0.0155382	0.020247	-3.66	-1.68	-3	-5.85	-1.87	-1.67
ENSMUSG00000029772.17	Ahcyl2	AHCYL2	-2.65	4.76	9.92552e-09	1.58936e-06	3.43	6.08	3.39	3.47	6.07	6.09
ENSMUSG00000020493.8	Prr11	PRR11	-2.65	4.02	3.60206e-08	2.01158e-06	2.7	5.35	2.68	2.7	5.41	5.28
ENSMUSG00000041120.6	Nbl1	NBL1	-2.65	2.4	1.91742e-07	3.45135e-06	1.09	3.73	1.03	1.12	3.72	3.73
ENSMUSG00000031274.16	Col4a5	COL4A5	-2.65	-0.33	0.000173721	0.000360467	-1.54	1.02	-2.18	-1.14	0.93	1.08
ENSMUSG00000040435.12	Ppp1r15a	PPP1R15A	-2.64	5.39	5.27149e-09	1.58936e-06	4.07	6.71	4.06	4.09	6.7	6.72
ENSMUSG00000048078.16	Tenm4	TENM4	-2.64	3.6	1.13639e-07	2.86811e-06	2.29	4.92	2.41	2.15	4.91	4.92
ENSMUSG00000020393.16	Kremen1	KREMEN1	-2.64	4.54	1.31615e-07	2.96241e-06	3.22	5.86	3.06	3.38	5.87	5.85
ENSMUSG00000022483.17	Col2a1	COL2A1	-2.64	1.91	7.44122e-07	6.44476e-06	0.62	3.24	0.51	0.67	3.17	3.29
ENSMUSG00000073514.4	Dok6	DOK6	-2.63	2.03	4.58132e-07	4.98784e-06	0.74	3.35	0.7	0.74	3.4	3.29
ENSMUSG00000092232.1	Gm20521	GM20521	-2.63	0.71	7.15593e-06	2.8344e-05	-0.56	2.04	-0.69	-0.53	1.92	2.14
ENSMUSG00000051864.10	Tbc1d22a	TBC1D22A	-2.62	4.84	1.53445e-07	3.18132e-06	3.52	6.14	3.36	3.69	6.14	6.15
ENSMUSG00000037071.3	Scd1	SCD1	-2.62	5.52	8.12719e-07	6.7401e-06	4.21	6.82	3.97	4.44	6.83	6.81
ENSMUSG00000048756.11	Foxo3	FOXO3	-2.61	7.2	6.12515e-09	1.58936e-06	5.89	8.5	5.86	5.92	8.51	8.49
ENSMUSG00000000628.10	Hk2	HK2	-2.61	7.01	8.26028e-09	1.58936e-06	5.7	8.32	5.75	5.65	8.31	8.32
ENSMUSG00000056270.3	Prr9	PRR9	-2.61	2.01	4.39384e-06	1.99293e-05	0.73	3.31	0.99	0.42	3.35	3.27
ENSMUSG00000031565.18	Fgfr1	FGFR1	-2.6	4.3	1.43289e-08	1.58936e-06	3	5.61	3.01	3	5.58	5.63
ENSMUSG00000047126.17	Cltc	CLTC	-2.6	8.55	2.43223e-08	1.86806e-06	7.25	9.86	7.18	7.33	9.86	9.85
ENSMUSG00000046139.8	Patl1	PATL1	-2.6	4.38	1.0139e-07	2.73621e-06	3.09	5.69	3.22	2.95	5.71	5.66
ENSMUSG00000043903.4	Zfp469	ZFP469	-2.6	4.53	1.46182e-07	3.10786e-06	3.24	5.82	3.39	3.07	5.81	5.84
ENSMUSG00000034488.14	Edil3	EDIL3	-2.6	1.52	6.72988e-06	2.71268e-05	0.26	2.83	0.04	0.4	2.69	2.97
ENSMUSG00000014813.9	Stc1	STC1	-2.6	0.63	9.7027e-06	3.51716e-05	-0.61	1.94	-0.73	-0.59	2.06	1.8
ENSMUSG00000001280.13	Sp1	SP1	-2.59	7.13	7.88728e-09	1.58936e-06	5.84	8.42	5.79	5.88	8.42	8.42
ENSMUSG00000034255.17	Arhgap27	ARHGAP27	-2.59	-0.53	3.85607e-05	0.00010372	-1.71	0.78	-1.78	-1.89	0.65	0.89
ENSMUSG00000047686.9	Rtl3	RTL3	-2.59	-1.26	0.000151958	0.000321143	-2.35	0.07	-2.87	-2.23	0.06	0.02
ENSMUSG00000039989.7	Cbx4	CBX4	-2.58	3.98	6.2944e-08	2.30562e-06	2.7	5.28	2.79	2.59	5.24	5.3
ENSMUSG00000018474.17	Chd3	CHD3	-2.58	6.97	1.69897e-07	3.29773e-06	5.69	8.27	5.84	5.53	8.25	8.28
ENSMUSG00000020439.17	Smtn	SMTN	-2.58	5.63	1.8936e-07	3.43095e-06	4.34	6.92	4.51	4.18	6.92	6.92
ENSMUSG00000033788.15	Dysf	DYSF	-2.58	0.9	5.35613e-06	2.28737e-05	-0.35	2.2	-0.4	-0.38	2.08	2.3
ENSMUSG00000028337.14	Coro2a	CORO2A	-2.58	0.34	1.10321e-05	3.85769e-05	-0.89	1.64	-0.92	-1	1.53	1.73
ENSMUSG00000006651.8	Aplp1	APLP1	-2.58	-2.13	0.000305546	0.000584482	-3.08	-0.8	-3.3	-3.53	-0.7	-1
ENSMUSG00000001930.17	Vwf	VWF	-2.58	-2.35	0.00128577	0.00208984	-3.23	-1	-4.22	-3.05	-0.9	-1.21
ENSMUSG00000034168.7	Irf2bpl	IRF2BPL	-2.57	7.11	5.76225e-09	1.58936e-06	5.83	8.39	5.82	5.83	8.37	8.42
ENSMUSG00000038780.14	Smurf1	SMURF1	-2.57	6.52	5.92187e-09	1.58936e-06	5.24	7.81	5.27	5.21	7.8	7.82
ENSMUSG00000004934.14	Pias4	PIAS4	-2.57	5.04	8.29521e-09	1.58936e-06	3.76	6.33	3.79	3.73	6.32	6.33
ENSMUSG00000040913.11	Fbxw4	FBXW4	-2.57	3.34	5.89503e-08	2.26838e-06	2.06	4.62	2.09	2.02	4.6	4.65
ENSMUSG00000078249.5	Hmga1b	HMGA1B	-2.57	5.57	5.95785e-08	2.26838e-06	4.29	6.86	4.17	4.4	6.82	6.9
ENSMUSG00000096472.2	Cdkn2d	CDKN2D	-2.56	5.58	5.80026e-09	1.58936e-06	4.3	6.86	4.28	4.31	6.85	6.86
ENSMUSG00000002900.16	Lamb1	LAMB1	-2.56	6.57	7.374e-09	1.58936e-06	5.29	7.85	5.32	5.27	7.82	7.88
ENSMUSG00000035441.14	Myo1d	MYO1D	-2.56	3.91	2.67461e-08	1.86806e-06	2.63	5.19	2.59	2.66	5.21	5.17
ENSMUSG00000034088.15	Hdlbp	HDLBP	-2.56	8.78	5.1462e-08	2.18403e-06	7.5	10.06	7.4	7.59	10.07	10.05
ENSMUSG00000034708.11	Grn	GRN	-2.56	6.93	4.5257e-07	4.95304e-06	5.65	8.21	5.46	5.84	8.2	8.22
ENSMUSG00000025083.18	Afap1l2	AFAP1L2	-2.56	1	1.89287e-05	5.85043e-05	-0.24	2.29	-0.6	0.03	2.2	2.37
ENSMUSG00000020614.13	Fam20a	FAM20A	-2.56	-0.72	6.0151e-05	0.000148314	-1.86	0.58	-2.18	-1.83	0.47	0.65
ENSMUSG00000030638.13	Sh3gl3	SH3GL3	-2.56	-1.49	0.000121572	0.000265825	-2.55	-0.18	-2.75	-2.8	-0.12	-0.31
ENSMUSG00000022231.10	Sema5a	SEMA5A	-2.56	-2.43	0.000646914	0.00113412	-3.31	-1.08	-3.69	-3.74	-1.42	-0.87
ENSMUSG00000074676.2	Foxs1	FOXS1	-2.56	-2.55	0.000910781	0.00153701	-3.4	-1.19	-3.93	-3.74	-1.58	-0.93
ENSMUSG00000038371.15	Sbf2	SBF2	-2.55	5.99	6.27252e-09	1.58936e-06	4.71	7.26	4.74	4.69	7.28	7.24
ENSMUSG00000032479.15	Map4	MAP4	-2.55	6.44	8.4045e-09	1.58936e-06	5.17	7.72	5.21	5.12	7.7	7.74
ENSMUSG00000079334.8	Naa80	NAA80	-2.55	4.6	1.03095e-08	1.58936e-06	3.33	5.88	3.32	3.33	5.87	5.89
ENSMUSG00000041046.7	Ramp3	RAMP3	-2.55	4.58	1.38462e-08	1.58936e-06	3.31	5.86	3.34	3.28	5.84	5.88
ENSMUSG00000039782.14	Cpeb2	CPEB2	-2.55	2.75	4.01542e-06	1.87519e-05	1.49	4.03	1.78	1.18	4.05	4
ENSMUSG00000021069.17	Pygl	PYGL	-2.55	-1.01	5.64324e-05	0.000140846	-2.12	0.29	-2.26	-2.31	0.24	0.29
ENSMUSG00000035929.11	H2-Q4	H2-Q4	-2.55	-1.82	0.000214753	0.000432398	-2.82	-0.5	-3.14	-3.05	-0.4	-0.69
ENSMUSG00000028341.9	Nr4a3	NR4A3	-2.55	-2.25	0.000563583	0.00100352	-3.16	-0.92	-3.3	-3.74	-0.75	-1.21
ENSMUSG00000040725.13	Hnrnpul1	HNRNPUL1	-2.54	7.3	7.06012e-09	1.58936e-06	6.03	8.57	6.05	6	8.56	8.58
ENSMUSG00000003541.6	Ier3	IER3	-2.54	6.83	1.4423e-08	1.58936e-06	5.56	8.11	5.5	5.63	8.08	8.13
ENSMUSG00000041132.11	N4bp2l1	N4BP2L1	-2.54	2.73	3.68495e-07	4.4135e-06	1.47	4	1.36	1.56	4.06	3.93
ENSMUSG00000049556.5	Lingo1	LINGO1	-2.54	-2.67	0.00962472	0.0129943	-3.38	-1.34	-2.75	-5.12	-1.34	-1.47
ENSMUSG00000021754.17	Map3k1	MAP3K1	-2.53	6.18	5.47725e-09	1.58936e-06	4.92	7.45	4.93	4.9	7.44	7.46
ENSMUSG00000026728.9	Vim	VIM	-2.53	10.39	4.32096e-08	2.13688e-06	9.13	11.65	9.06	9.2	11.64	11.66
ENSMUSG00000056493.9	Foxk1	FOXK1	-2.53	5.29	2.30998e-07	3.7079e-06	4.03	6.55	4.2	3.86	6.58	6.53
ENSMUSG00000058655.9	Eif4b	EIF4B	-2.53	9.94	3.8818e-07	4.52841e-06	8.68	11.21	8.51	8.84	11.2	11.21
ENSMUSG00000042428.6	Mgat3	MGAT3	-2.53	6.11	8.2971e-07	6.81784e-06	4.85	7.38	4.63	5.06	7.36	7.39
ENSMUSG00000017400.10	Stac2	STAC2	-2.53	-0.91	7.90357e-05	0.000185712	-2.01	0.37	-2.11	-2.23	0.49	0.21
ENSMUSG00000033213.16	AA467197	AA467197	-2.53	-0.96	8.40455e-05	0.000195437	-2.07	0.33	-2.44	-2.01	0.27	0.35
ENSMUSG00000045777.14	Ifitm10	IFITM10	-2.52	1.34	2.0011e-06	1.17157e-05	0.12	2.61	0.03	0.14	2.55	2.67
ENSMUSG00000044224.16	Dnajc21	DNAJC21	-2.51	4.98	8.78868e-09	1.58936e-06	3.73	6.23	3.72	3.73	6.22	6.25
ENSMUSG00000005374.13	Tbl2	TBL2	-2.51	6.28	1.13678e-08	1.58936e-06	5.03	7.54	4.97	5.08	7.53	7.55
ENSMUSG00000045071.14	E130308A19Rik	E130308A19RIK	-2.51	4.24	2.47153e-08	1.86806e-06	3	5.5	3.04	2.94	5.51	5.48
ENSMUSG00000022443.17	Myh9	MYH9	-2.51	9.12	2.60031e-08	1.86806e-06	7.87	10.38	7.93	7.81	10.36	10.39
ENSMUSG00000020653.12	Klf11	KLF11	-2.51	3.84	3.84017e-08	2.04864e-06	2.59	5.1	2.53	2.65	5.11	5.09
ENSMUSG00000066026.14	Dhrs3	DHRS3	-2.51	4.07	4.53577e-08	2.14238e-06	2.82	5.33	2.72	2.89	5.32	5.33
ENSMUSG00000001349.5	Cnn1	CNN1	-2.51	-1.65	0.000216588	0.000435602	-2.65	-0.36	-2.75	-3.05	-0.25	-0.54
ENSMUSG00000040010.10	Slc7a5	SLC7A5	-2.5	6.96	5.73367e-09	1.58936e-06	5.7	8.21	5.7	5.71	8.22	8.2
ENSMUSG00000033701.13	Acbd6	ACBD6	-2.5	5.75	1.1311e-08	1.58936e-06	4.5	7	4.45	4.55	6.98	7.01
ENSMUSG00000035152.14	Ap2b1	AP2B1	-2.5	6.82	7.36105e-08	2.418e-06	5.57	8.07	5.45	5.69	8.07	8.07
ENSMUSG00000038517.15	Tbkbp1	TBKBP1	-2.5	4.67	2.01103e-07	3.48607e-06	3.42	5.92	3.58	3.26	5.91	5.91
ENSMUSG00000026447.16	Pik3c2b	PIK3C2B	-2.5	3.43	2.07689e-06	1.20974e-05	2.19	4.67	2.44	1.92	4.71	4.64
ENSMUSG00000018765.5	Fxr2	FXR2	-2.49	6.94	5.87734e-09	1.58936e-06	5.7	8.18	5.7	5.7	8.18	8.19
ENSMUSG00000031375.17	Bgn	BGN	-2.49	0.84	4.82874e-06	2.12647e-05	-0.36	2.09	-0.36	-0.45	2.15	2.02
ENSMUSG00000043670.4	Diras1	DIRAS1	-2.49	-2.64	0.00140978	0.00227112	-3.42	-1.33	-3.48	-4.27	-1.14	-1.67
ENSMUSG00000022564.7	Grina	GRINA	-2.48	6.93	6.57204e-09	1.58936e-06	5.69	8.17	5.71	5.67	8.17	8.17
ENSMUSG00000020189.14	Osbpl8	OSBPL8	-2.48	6.25	2.15583e-08	1.80573e-06	5	7.49	4.93	5.08	7.5	7.48
ENSMUSG00000022474.15	Pmm1	PMM1	-2.48	5.63	6.11186e-08	2.26838e-06	4.39	6.88	4.28	4.5	6.85	6.9
ENSMUSG00000031529.5	Tnks	TNKS	-2.48	6.1	1.1571e-07	2.86811e-06	4.87	7.34	5	4.73	7.35	7.33
ENSMUSG00000047496.6	Rnf152	RNF152	-2.48	0.86	4.00829e-06	1.87443e-05	-0.34	2.1	-0.43	-0.34	2.06	2.13
ENSMUSG00000033227.7	Wnt6	WNT6	-2.48	-1.68	0.000389787	0.000722739	-2.66	-0.41	-2.64	-3.19	-0.25	-0.64
ENSMUSG00000021144.14	Mta1	MTA1	-2.47	7.26	6.79151e-09	1.58936e-06	6.03	8.5	6.02	6.04	8.5	8.5
ENSMUSG00000036390.8	Gadd45a	GADD45A	-2.47	5.48	8.16068e-09	1.58936e-06	4.25	6.72	4.27	4.22	6.71	6.73
ENSMUSG00000037062.13	Sh3glb1	SH3GLB1	-2.47	7.27	9.00032e-09	1.58936e-06	6.04	8.5	6	6.07	8.49	8.51
ENSMUSG00000033306.15	Lpp	LPP	-2.47	6	6.59775e-08	2.35495e-06	4.77	7.24	4.88	4.65	7.24	7.23
ENSMUSG00000030584.14	Dpf1	DPF1	-2.47	3.08	9.24462e-08	2.63941e-06	1.86	4.32	1.85	1.85	4.3	4.35
ENSMUSG00000004207.14	Psap	PSAP	-2.47	9.09	6.80671e-07	6.15753e-06	7.86	10.33	7.68	8.04	10.34	10.32
ENSMUSG00000049598.9	Vsig8	VSIG8	-2.47	-2.47	0.00113514	0.00187087	-3.31	-1.16	-3.69	-3.74	-1.58	-0.87
ENSMUSG00000028125.14	Abca4	ABCA4	-2.47	-2.41	0.00116046	0.00190737	-3.25	-1.12	-3.3	-3.98	-0.9	-1.47
ENSMUSG00000005672.12	Kit	KIT	-2.47	-1.77	0.00188468	0.00294516	-2.72	-0.5	-3.69	-2.31	-0.32	-0.75
ENSMUSG00000038859.7	Baiap2l1	BAIAP2L1	-2.46	3.84	3.81531e-08	2.04853e-06	2.62	5.07	2.56	2.66	5.06	5.08
ENSMUSG00000025025.14	Mxi1	MXI1	-2.46	6.92	1.24553e-07	2.96241e-06	5.69	8.15	5.56	5.82	8.2	8.11
ENSMUSG00000027314.6	Dll4	DLL4	-2.46	-2.73	0.000712731	0.00123753	-3.49	-1.43	-3.93	-3.98	-1.34	-1.67
ENSMUSG00000021770.11	Samd8	SAMD8	-2.45	5.22	9.45739e-09	1.58936e-06	4	6.45	4	4	6.47	6.42
ENSMUSG00000002957.11	Ap2a2	AP2A2	-2.45	7.66	1.14028e-08	1.58936e-06	6.44	8.89	6.4	6.47	8.88	8.9
ENSMUSG00000015522.18	Arnt	ARNT	-2.45	5.88	1.79115e-08	1.6547e-06	4.65	7.1	4.59	4.72	7.11	7.09
ENSMUSG00000030738.11	Eif3c	EIF3C	-2.45	8.76	3.54652e-07	4.35993e-06	7.53	9.98	7.37	7.69	9.98	9.99
ENSMUSG00000047963.7	Stbd1	STBD1	-2.45	6.01	5.18e-07	5.29548e-06	4.79	7.23	4.6	4.97	7.25	7.22
ENSMUSG00000039153.17	Runx2	RUNX2	-2.45	4.34	6.9408e-07	6.1833e-06	3.12	5.56	3.33	2.91	5.57	5.55
ENSMUSG00000034591.5	Slc41a2	SLC41A2	-2.45	2.08	4.09346e-06	1.90201e-05	0.88	3.31	0.6	1.11	3.31	3.3
ENSMUSG00000074577.9	Ripor3	RIPOR3	-2.45	0.07	1.45204e-05	4.75584e-05	-1.08	1.31	-1.2	-1.1	1.31	1.28
ENSMUSG00000041695.2	Kcnj2	KCNJ2	-2.45	-0.73	4.73292e-05	0.000122279	-1.83	0.51	-1.97	-1.95	0.51	0.47
ENSMUSG00000000247.11	Lhx2	LHX2	-2.45	-2.76	0.000853128	0.00145061	-3.5	-1.46	-3.69	-4.27	-1.5	-1.56
ENSMUSG00000048701.13	Ccdc6	CCDC6	-2.44	6.06	8.01693e-09	1.58936e-06	4.85	7.29	4.87	4.82	7.3	7.27
ENSMUSG00000050390.12	C77080	C77080	-2.43	4.77	1.376e-08	1.58936e-06	3.56	5.99	3.59	3.53	6	5.98
ENSMUSG00000033577.18	Myo6	MYO6	-2.43	4.41	1.1343e-07	2.86811e-06	3.2	5.62	3.07	3.31	5.65	5.59
ENSMUSG00000052698.15	Tln2	TLN2	-2.42	5.04	1.18054e-08	1.58936e-06	3.84	6.25	3.85	3.81	6.23	6.27
ENSMUSG00000028960.19	Ube4b	UBE4B	-2.42	6.68	1.76186e-08	1.65194e-06	5.47	7.89	5.54	5.41	7.88	7.9
ENSMUSG00000025880.11	Smad7	SMAD7	-2.42	5.71	2.6181e-07	3.84274e-06	4.5	6.92	4.66	4.34	6.94	6.9
ENSMUSG00000056234.15	Ncoa4	NCOA4	-2.42	7.9	9.09458e-07	7.2365e-06	6.7	9.11	6.5	6.89	9.11	9.11
ENSMUSG00000007594.10	Hapln4	HAPLN4	-2.42	0.43	3.21123e-05	8.92707e-05	-0.71	1.64	-0.79	-0.75	1.83	1.44
ENSMUSG00000041075.8	Fzd7	FZD7	-2.41	6.98	1.6554e-08	1.61033e-06	5.78	8.18	5.72	5.83	8.19	8.17
ENSMUSG00000045176.3	Borcs6	BORCS6	-2.41	4.41	7.55737e-08	2.43463e-06	3.21	5.61	3.1	3.31	5.59	5.63
ENSMUSG00000035284.10	Vps13c	VPS13C	-2.41	4.46	1.07206e-07	2.80611e-06	3.26	5.67	3.38	3.13	5.64	5.69
ENSMUSG00000038708.10	Golga4	GOLGA4	-2.41	6.62	2.3313e-07	3.71408e-06	5.42	7.84	5.57	5.27	7.84	7.83
ENSMUSG00000052837.6	Junb	JUNB	-2.4	8.37	2.95865e-08	1.91597e-06	7.17	9.57	7.11	7.23	9.54	9.6
ENSMUSG00000005148.8	Klf5	KLF5	-2.4	5	4.88141e-08	2.14675e-06	3.8	6.2	3.89	3.7	6.18	6.21
ENSMUSG00000031758.10	Cdyl2	CDYL2	-2.4	2.17	5.28942e-07	5.37111e-06	0.99	3.37	0.97	0.97	3.41	3.32
ENSMUSG00000022892.11	App	APP	-2.4	6.53	1.01505e-06	7.6965e-06	5.33	7.73	5.12	5.54	7.72	7.74
ENSMUSG00000025026.15	Add3	ADD3	-2.4	5.51	1.51843e-06	9.80346e-06	4.31	6.71	4.08	4.55	6.69	6.74
ENSMUSG00000038387.9	Rras	RRAS	-2.4	4.19	1.86786e-06	1.12469e-05	3	5.39	2.74	3.24	5.43	5.36
ENSMUSG00000034640.9	Tiparp	TIPARP	-2.39	6.63	7.65103e-09	1.58936e-06	5.44	7.82	5.42	5.45	7.82	7.82
ENSMUSG00000073700.3	Klhl21	KLHL21	-2.39	6.13	2.74938e-08	1.86811e-06	4.93	7.32	5.01	4.85	7.32	7.32
ENSMUSG00000028128.13	F3	F3	-2.39	4.14	6.56274e-08	2.35495e-06	2.95	5.34	3.04	2.86	5.33	5.34
ENSMUSG00000058756.13	Thra	THRA	-2.39	4.54	9.24777e-08	2.63941e-06	3.36	5.73	3.23	3.46	5.75	5.72
ENSMUSG00000020902.12	Ntn1	NTN1	-2.39	4.39	1.00195e-07	2.72307e-06	3.2	5.58	3.08	3.31	5.58	5.59
ENSMUSG00000026478.14	Lamc1	LAMC1	-2.39	7.16	1.2603e-07	2.96241e-06	5.96	8.35	6.09	5.84	8.34	8.36
ENSMUSG00000020427.11	Igfbp3	IGFBP3	-2.39	4.96	1.71974e-07	3.30226e-06	3.77	6.16	3.63	3.91	6.19	6.13
ENSMUSG00000001348.15	Acp5	ACP5	-2.39	-1.62	0.000447937	0.000818363	-2.58	-0.38	-3.14	-2.49	-0.56	-0.27
ENSMUSG00000002546.16	Golga2	GOLGA2	-2.38	5.96	1.0627e-08	1.58936e-06	4.77	7.16	4.74	4.8	7.13	7.18
ENSMUSG00000041720.14	Pi4ka	PI4KA	-2.38	5.28	1.29658e-08	1.58936e-06	4.09	6.47	4.05	4.13	6.48	6.47
ENSMUSG00000072872.3	Rybp	RYBP	-2.38	5.27	1.77798e-08	1.6547e-06	4.08	6.46	4.07	4.1	6.51	6.42
ENSMUSG00000099083.7	Atf7	ATF7	-2.38	3.91	1.48532e-07	3.13112e-06	2.72	5.1	2.84	2.6	5.07	5.13
ENSMUSG00000026043.18	Col3a1	COL3A1	-2.38	10.59	2.43325e-07	3.74592e-06	9.4	11.78	9.28	9.53	11.76	11.8
ENSMUSG00000041779.5	Tram2	TRAM2	-2.38	3.03	3.87153e-07	4.52498e-06	1.85	4.22	1.94	1.74	4.28	4.16
ENSMUSG00000030695.16	Aldoa	ALDOA	-2.38	12.05	1.73802e-06	1.06989e-05	10.86	13.24	10.66	11.06	13.24	13.24
ENSMUSG00000046607.6	Hrk	HRK	-2.38	-0.14	2.70699e-05	7.81135e-05	-1.24	1.06	-1.28	-1.37	1.12	0.98
ENSMUSG00000024201.12	Kdm4b	KDM4B	-2.37	5.82	9.8272e-09	1.58936e-06	4.63	7	4.6	4.66	7	7
ENSMUSG00000038290.15	Smg6	SMG6	-2.37	5.23	1.36282e-08	1.58936e-06	4.05	6.43	4.08	4.01	6.4	6.44
ENSMUSG00000023951.17	Vegfa	VEGFA	-2.37	7.86	1.46263e-07	3.10786e-06	6.66	9.04	6.79	6.54	9.05	9.04
ENSMUSG00000049382.10	Krt8	KRT8	-2.37	0.55	0.000329624	0.000624456	-0.58	1.75	-1.24	-0.04	1.69	1.79
ENSMUSG00000095098.2	Ccdc85b	CCDC85B	-2.36	5.81	2.43788e-08	1.86806e-06	4.63	6.98	4.69	4.57	6.95	7.02
ENSMUSG00000047921.17	Trappc9	TRAPPC9	-2.36	4	3.11178e-08	1.92224e-06	2.82	5.17	2.8	2.84	5.18	5.17
ENSMUSG00000050148.9	Ubqln2	UBQLN2	-2.36	4.39	3.27994e-08	1.94383e-06	3.21	5.57	3.26	3.14	5.57	5.56
ENSMUSG00000042419.8	Nfkbil1	NFKBIL1	-2.36	3.9	8.97214e-08	2.61147e-06	2.72	5.07	2.66	2.77	5.02	5.13
ENSMUSG00000020402.11	Vdac1	VDAC1	-2.36	8.03	3.27176e-07	4.19107e-06	6.85	9.21	6.7	7	9.19	9.23
ENSMUSG00000090213.1	Tmem189	TMEM189	-2.35	5.78	1.28548e-08	1.58936e-06	4.61	6.96	4.57	4.65	6.96	6.96
ENSMUSG00000039191.12	Rbpj	RBPJ	-2.35	7.48	3.96998e-08	2.06966e-06	6.3	8.66	6.22	6.39	8.66	8.65
ENSMUSG00000043614.13	Vps37d	VPS37D	-2.35	2.76	2.08159e-07	3.55824e-06	1.6	3.94	1.58	1.59	3.91	3.97
ENSMUSG00000046056.15	Sbsn	SBSN	-2.35	2.12	5.32554e-07	5.40033e-06	0.96	3.3	0.92	0.97	3.3	3.3
ENSMUSG00000055799.13	Tcf7l1	TCF7L1	-2.35	0.76	2.06442e-05	6.27414e-05	-0.36	1.94	-0.15	-0.67	1.94	1.92
ENSMUSG00000079652.8	Fam71f2	FAM71F2	-2.35	-0.09	0.000119963	0.000263008	-1.18	1.09	-0.92	-1.61	1.2	0.96
ENSMUSG00000037664.13	Cdkn1c	CDKN1C	-2.35	-0.34	0.000206673	0.000418744	-1.42	0.86	-1.28	-1.77	0.59	1.09
ENSMUSG00000011257.19	Pabpc4	PABPC4	-2.34	8.21	1.32536e-08	1.58936e-06	7.04	9.38	7.05	7.03	9.4	9.37
ENSMUSG00000024044.18	Epb41l3	EPB41L3	-2.34	5.19	2.34097e-08	1.86152e-06	4.03	6.37	3.97	4.08	6.35	6.38
ENSMUSG00000029648.13	Flt1	FLT1	-2.34	3.9	5.59199e-08	2.24969e-06	2.74	5.07	2.68	2.79	5.1	5.04
ENSMUSG00000037487.7	Ubr5	UBR5	-2.34	7.65	3.97277e-07	4.58852e-06	6.48	8.82	6.64	6.33	8.82	8.82
ENSMUSG00000018800.14	Abca5	ABCA5	-2.34	3.58	5.05087e-07	5.23159e-06	2.42	4.75	2.24	2.57	4.77	4.74
ENSMUSG00000013367.5	Iglon5	IGLON5	-2.34	1.69	3.40778e-06	1.68035e-05	0.55	2.87	0.64	0.41	2.95	2.76
ENSMUSG00000028032.13	Papss1	PAPSS1	-2.34	6.35	3.72529e-06	1.77559e-05	5.18	7.52	4.92	5.44	7.5	7.54
ENSMUSG00000022012.9	Enox1	ENOX1	-2.34	-2.65	0.00511032	0.00726641	-3.34	-1.4	-3	-4.63	-1.58	-1.38
ENSMUSG00000030681.18	Mvp	MVP	-2.33	5.86	9.859e-09	1.58936e-06	4.7	7.02	4.67	4.72	7.02	7.02
ENSMUSG00000046711.16	Hmga1	HMGA1	-2.33	8.75	4.87282e-08	2.14675e-06	7.59	9.91	7.52	7.66	9.91	9.92
ENSMUSG00000038742.7	Angptl6	ANGPTL6	-2.33	1.86	1.22974e-06	8.62194e-06	0.72	3.03	0.61	0.77	3	3.06
ENSMUSG00000055675.6	Kbtbd11	KBTBD11	-2.33	1.77	1.87588e-06	1.1271e-05	0.62	2.94	0.6	0.6	2.85	3.02
ENSMUSG00000025427.15	Rnf165	RNF165	-2.33	0.64	7.5051e-06	2.92475e-05	-0.48	1.82	-0.57	-0.47	1.8	1.82
ENSMUSG00000049892.7	Rasd1	RASD1	-2.33	-3.11	0.00184427	0.00288992	-3.71	-1.84	-4.58	-3.98	-2.11	-1.78
ENSMUSG00000039318.12	Rab3gap2	RAB3GAP2	-2.32	6.38	9.80417e-09	1.58936e-06	5.22	7.54	5.24	5.2	7.53	7.56
ENSMUSG00000031983.7	2310022B05Rik	2310022B05RIK	-2.32	6.12	9.89821e-09	1.58936e-06	4.96	7.28	4.94	4.98	7.27	7.29
ENSMUSG00000025969.15	Nrp2	NRP2	-2.32	7.72	1.71526e-08	1.62034e-06	6.56	8.87	6.52	6.6	8.86	8.88
ENSMUSG00000031502.11	Col4a1	COL4A1	-2.32	5.62	2.6438e-08	1.86806e-06	4.46	6.78	4.44	4.47	6.71	6.84
ENSMUSG00000037465.10	Klf10	KLF10	-2.32	6.98	2.96179e-08	1.91597e-06	5.82	8.14	5.75	5.89	8.14	8.15
ENSMUSG00000037161.14	Mgarp	MGARP	-2.32	3.52	1.59623e-07	3.22002e-06	2.37	4.69	2.27	2.46	4.7	4.66
ENSMUSG00000028635.7	Edn2	EDN2	-2.32	3.05	2.25151e-07	3.69069e-06	1.9	4.21	1.97	1.81	4.19	4.22
ENSMUSG00000041598.7	Cdc42ep4	CDC42EP4	-2.32	4.3	3.46851e-07	4.32027e-06	3.14	5.46	2.98	3.3	5.47	5.45
ENSMUSG00000010051.15	Hyal1	HYAL1	-2.32	4.11	3.85697e-07	4.52498e-06	2.96	5.26	3.11	2.79	5.26	5.27
ENSMUSG00000025203.6	Scd2	SCD2	-2.32	10.29	9.61728e-07	7.46702e-06	9.14	11.46	8.96	9.31	11.44	11.47
ENSMUSG00000063065.13	Mapk3	MAPK3	-2.32	7.22	1.10068e-06	8.02008e-06	6.05	8.38	5.86	6.25	8.39	8.37
ENSMUSG00000039936.18	Pik3cd	PIK3CD	-2.32	0.09	4.31035e-05	0.000113367	-1	1.26	-1.2	-0.93	1.39	1.11
ENSMUSG00000037010.7	Apln	APLN	-2.31	5.07	1.29383e-08	1.58936e-06	3.92	6.22	3.9	3.93	6.22	6.23
ENSMUSG00000025225.15	Nfkb2	NFKB2	-2.31	5.41	1.30675e-08	1.58936e-06	4.26	6.56	4.27	4.24	6.54	6.59
ENSMUSG00000022946.10	Dop1b	DOP1B	-2.31	3.25	1.43449e-07	3.09141e-06	2.11	4.41	2.15	2.05	4.44	4.37
ENSMUSG00000020140.15	Lgr5	LGR5	-2.31	1.72	1.86686e-06	1.12469e-05	0.58	2.88	0.58	0.54	2.94	2.79
ENSMUSG00000026435.15	Slc45a3	SLC45A3	-2.31	1.58	4.26713e-06	1.95309e-05	0.45	2.74	0.58	0.27	2.68	2.8
ENSMUSG00000024534.15	Sncaip	SNCAIP	-2.31	-0.35	7.24651e-05	0.000172532	-1.41	0.83	-1.51	-1.51	0.65	0.98
ENSMUSG00000056413.16	Adap1	ADAP1	-2.31	-3.06	0.00755227	0.0103974	-3.62	-1.8	-5.07	-3.35	-1.77	-2.03
ENSMUSG00000039633.6	Lonrf1	LONRF1	-2.3	3.81	7.12285e-08	2.40527e-06	2.66	4.96	2.6	2.72	4.97	4.95
ENSMUSG00000030397.10	Mark4	MARK4	-2.3	4.3	1.04928e-07	2.78026e-06	3.15	5.45	3.25	3.04	5.43	5.47
ENSMUSG00000051586.16	Mical3	MICAL3	-2.3	5.04	1.15529e-06	8.24844e-06	3.89	6.19	4.09	3.68	6.14	6.24
ENSMUSG00000030543.10	Mesp2	MESP2	-2.3	-1.88	0.000629224	0.00110707	-2.76	-0.68	-2.87	-3.19	-0.96	-0.49
ENSMUSG00000044864.16	Ankrd50	ANKRD50	-2.29	6.84	1.26853e-08	1.58936e-06	5.69	7.99	5.66	5.72	7.98	7.99
ENSMUSG00000039414.10	Heatr5b	HEATR5B	-2.29	4.4	2.70583e-08	1.86806e-06	3.25	5.54	3.29	3.22	5.54	5.54
ENSMUSG00000069729.14	Arid1b	ARID1B	-2.29	5.44	2.2385e-07	3.6806e-06	4.3	6.58	4.44	4.16	6.56	6.61
ENSMUSG00000040428.19	Plekha4	PLEKHA4	-2.29	1.52	7.31821e-06	2.87511e-05	0.4	2.67	0.58	0.18	2.6	2.73
ENSMUSG00000032637.15	Atxn2l	ATXN2L	-2.29	5.81	4.60412e-06	2.06078e-05	4.67	6.96	4.94	4.4	6.98	6.94
ENSMUSG00000023045.13	Soat2	SOAT2	-2.29	-2.37	0.000688211	0.00119943	-3.16	-1.16	-3.48	-3.53	-1.07	-1.38
ENSMUSG00000033487.14	Fndc3a	FNDC3A	-2.28	5.78	2.63929e-08	1.86806e-06	4.64	6.92	4.58	4.71	6.92	6.92
ENSMUSG00000022353.10	Mtss1	MTSS1	-2.28	5.29	2.75072e-08	1.86811e-06	4.15	6.43	4.1	4.21	6.46	6.4
ENSMUSG00000026615.14	Eprs	EPRS	-2.28	8.47	6.94895e-08	2.39853e-06	7.34	9.61	7.25	7.42	9.61	9.62
ENSMUSG00000004508.6	Gab2	GAB2	-2.28	3.46	8.60629e-08	2.56307e-06	2.33	4.6	2.29	2.35	4.58	4.62
ENSMUSG00000028954.11	Nub1	NUB1	-2.28	6.62	1.51785e-07	3.16257e-06	5.47	7.76	5.35	5.6	7.75	7.77
ENSMUSG00000001435.15	Col18a1	COL18A1	-2.28	7.39	2.82618e-07	3.98279e-06	6.25	8.52	6.11	6.39	8.51	8.54
ENSMUSG00000017390.15	Aldoc	ALDOC	-2.28	6.35	3.23972e-07	4.17475e-06	5.21	7.49	5.06	5.36	7.47	7.52
ENSMUSG00000042506.15	Usp22	USP22	-2.28	7.75	5.9238e-07	5.72953e-06	6.62	8.89	6.45	6.78	8.91	8.87
ENSMUSG00000020277.10	Pfkl	PFKL	-2.28	8.27	1.1183e-06	8.08882e-06	7.13	9.41	6.95	7.32	9.39	9.43
ENSMUSG00000024598.9	Fbn2	FBN2	-2.28	2.22	1.32425e-05	4.43623e-05	1.1	3.36	1.39	0.76	3.32	3.4
ENSMUSG00000069833.13	Ahnak	AHNAK	-2.27	9.16	4.7831e-08	2.14675e-06	8.03	10.3	8.09	7.96	10.3	10.3
ENSMUSG00000038025.8	Phf2	PHF2	-2.27	5.05	7.29466e-08	2.41255e-06	3.92	6.18	4.01	3.81	6.18	6.18
ENSMUSG00000024501.20	Dpysl3	DPYSL3	-2.27	7.86	1.18475e-06	8.40023e-06	6.72	9	6.53	6.92	9.01	8.98
ENSMUSG00000021359.16	Tfap2a	TFAP2A	-2.27	-0.05	0.000102884	0.000230852	-1.09	1.09	-0.98	-1.37	1.27	0.89
ENSMUSG00000020122.16	Egfr	EGFR	-2.26	5.07	5.53858e-08	2.24969e-06	3.94	6.2	3.85	4.03	6.21	6.19
ENSMUSG00000027204.13	Fbn1	FBN1	-2.26	5.21	1.08437e-07	2.82608e-06	4.08	6.34	4.19	3.97	6.31	6.38
ENSMUSG00000089762.3	Ier5l	IER5L	-2.26	5.87	1.49892e-07	3.13352e-06	4.74	7	4.86	4.61	7	7.01
ENSMUSG00000033065.14	Pfkm	PFKM	-2.26	5.99	2.9177e-07	4.01037e-06	4.86	7.12	4.71	5	7.1	7.13
ENSMUSG00000003363.15	Pld3	PLD3	-2.26	4.49	4.02314e-07	4.62035e-06	3.36	5.62	3.19	3.52	5.6	5.63
ENSMUSG00000061451.13	Tmem151a	TMEM151A	-2.26	0.68	8.19465e-06	3.10675e-05	-0.4	1.82	-0.47	-0.43	1.79	1.82
ENSMUSG00000004609.11	Cd33	CD33	-2.26	-2.7	0.00103256	0.00171942	-3.4	-1.49	-3.69	-3.98	-1.67	-1.47
ENSMUSG00000037788.14	Vopp1	VOPP1	-2.25	5.57	4.71177e-08	2.14675e-06	4.45	6.7	4.36	4.53	6.68	6.71
ENSMUSG00000038034.15	Igsf8	IGSF8	-2.25	6.95	1.47112e-07	3.11165e-06	5.83	8.07	5.71	5.94	8.05	8.1
ENSMUSG00000030287.15	Itpr2	ITPR2	-2.25	3.19	2.49186e-07	3.78112e-06	2.07	4.31	2.06	2.06	4.25	4.38
ENSMUSG00000045348.16	Nyap1	NYAP1	-2.25	3.98	2.56223e-07	3.81738e-06	2.87	5.11	2.99	2.73	5.12	5.09
ENSMUSG00000061436.15	Hipk2	HIPK2	-2.25	4.64	1.02012e-06	7.7156e-06	3.52	5.77	3.72	3.32	5.73	5.81
ENSMUSG00000053580.16	Tanc2	TANC2	-2.25	3.5	1.77628e-06	1.08618e-05	2.38	4.62	2.58	2.17	4.56	4.68
ENSMUSG00000022687.12	Boc	BOC	-2.25	-1.44	0.000277411	0.000539284	-2.37	-0.28	-2.44	-2.69	-0.19	-0.45
ENSMUSG00000062591.5	Tubb4a	TUBB4A	-2.25	-1.93	0.000540469	0.000965787	-2.78	-0.76	-3.3	-2.8	-0.8	-0.81
ENSMUSG00000025743.14	Sdc3	SDC3	-2.24	6.42	1.47511e-08	1.58936e-06	5.3	7.54	5.27	5.34	7.54	7.55
ENSMUSG00000040690.15	Col16a1	COL16A1	-2.24	5.29	1.89062e-08	1.6728e-06	4.17	6.4	4.21	4.14	6.39	6.42
ENSMUSG00000020409.10	Slu7	SLU7	-2.24	5.21	4.08478e-08	2.08623e-06	4.08	6.33	4.01	4.16	6.33	6.32
ENSMUSG00000026155.13	Smap1	SMAP1	-2.24	5.57	1.56404e-07	3.19522e-06	4.46	6.7	4.33	4.58	6.72	6.67
ENSMUSG00000039087.17	Rreb1	RREB1	-2.24	4.4	9.49922e-07	7.42215e-06	3.29	5.52	3.48	3.09	5.55	5.48
ENSMUSG00000044938.8	Klhl31	KLHL31	-2.24	-3.41	0.00439357	0.00633472	-3.86	-2.15	-5.07	-3.98	-2.24	-2.34
ENSMUSG00000004846.10	Plod3	PLOD3	-2.23	6.62	1.47378e-08	1.58936e-06	5.5	7.74	5.47	5.54	7.73	7.75
ENSMUSG00000054499.9	Dedd2	DEDD2	-2.23	5.02	2.44967e-08	1.86806e-06	3.91	6.13	3.95	3.86	6.14	6.13
ENSMUSG00000057335.11	Cep170	CEP170	-2.23	6.5	3.06848e-08	1.92224e-06	5.39	7.62	5.45	5.32	7.61	7.62
ENSMUSG00000030685.5	Kctd13	KCTD13	-2.23	3.51	1.08643e-07	2.82608e-06	2.4	4.62	2.41	2.38	4.58	4.67
ENSMUSG00000038550.10	Ciart	CIART	-2.23	3.29	2.35603e-07	3.71408e-06	2.18	4.4	2.08	2.27	4.39	4.41
ENSMUSG00000028542.17	Slc6a9	SLC6A9	-2.23	3.09	4.83327e-07	5.12017e-06	1.98	4.2	2.1	1.85	4.19	4.21
ENSMUSG00000028756.12	Pink1	PINK1	-2.23	4.9	1.24095e-06	8.64825e-06	3.79	6.02	3.58	3.99	6.03	6
ENSMUSG00000015837.15	Sqstm1	SQSTM1	-2.23	8.59	1.73552e-06	1.06888e-05	7.47	9.71	7.28	7.67	9.71	9.71
ENSMUSG00000059842.12	Zfp341	ZFP341	-2.23	1.49	3.56446e-06	1.72911e-05	0.4	2.62	0.26	0.5	2.64	2.58
ENSMUSG00000023984.17	Gm20517	GM20517	-2.23	0.19	2.01825e-05	6.166e-05	-0.86	1.31	-0.97	-0.88	1.3	1.31
ENSMUSG00000116378.1	Gcat	GCAT	-2.23	-4.03	0.410125	0.43893	-3.76	-2.29	-2.69	-7.44	0.43	-6.42
ENSMUSG00000024991.8	Eif3a	EIF3A	-2.22	8.8	2.62931e-08	1.86806e-06	7.69	9.91	7.72	7.66	9.91	9.91
ENSMUSG00000031029.6	Eif3f	EIF3F	-2.22	8.03	3.16419e-08	1.92224e-06	6.92	9.14	6.87	6.97	9.16	9.13
ENSMUSG00000041957.15	Pkp2	PKP2	-2.22	5.94	5.16282e-08	2.18403e-06	4.84	7.05	4.76	4.91	7.01	7.09
ENSMUSG00000042644.9	Itpr3	ITPR3	-2.22	7.3	6.73626e-08	2.37737e-06	6.19	8.41	6.28	6.1	8.4	8.42
ENSMUSG00000028530.14	Jak1	JAK1	-2.22	7.2	9.90936e-08	2.7229e-06	6.1	8.31	6	6.2	8.3	8.32
ENSMUSG00000025408.15	Ddit3	DDIT3	-2.22	4.48	1.31265e-07	2.96241e-06	3.38	5.6	3.48	3.27	5.56	5.62
ENSMUSG00000039234.11	Sec24d	SEC24D	-2.22	4.85	2.01074e-07	3.48607e-06	3.74	5.96	3.61	3.87	5.98	5.94
ENSMUSG00000031012.17	Cask	CASK	-2.22	5.59	2.6433e-07	3.85271e-06	4.49	6.7	4.34	4.63	6.72	6.69
ENSMUSG00000020034.7	Tcp11l2	TCP11L2	-2.22	4.53	2.70351e-06	1.4405e-05	3.42	5.64	3.17	3.66	5.64	5.65
ENSMUSG00000078794.4	Dact3	DACT3	-2.22	0.05	0.000100469	0.00022642	-0.98	1.17	-0.73	-1.37	1.21	1.11
ENSMUSG00000037868.15	Egr2	EGR2	-2.22	-0.54	0.000113232	0.000250157	-1.54	0.58	-1.41	-1.89	0.57	0.57
ENSMUSG00000049800.13	Sertad2	SERTAD2	-2.21	5.28	4.52733e-08	2.14238e-06	4.18	6.39	4.25	4.11	6.36	6.42
ENSMUSG00000049422.7	Chchd10	CHCHD10	-2.21	2.93	2.33166e-07	3.71408e-06	1.84	4.04	1.78	1.88	4.05	4.03
ENSMUSG00000024810.16	Il33	IL33	-2.21	3.33	6.32606e-07	5.90092e-06	2.23	4.44	2.07	2.37	4.44	4.42
ENSMUSG00000055053.18	Nfic	NFIC	-2.21	5.1	8.15957e-07	6.7401e-06	4	6.21	4.18	3.81	6.21	6.2
ENSMUSG00000087006.3	Gm13889	GM13889	-2.21	0.49	2.5877e-05	7.53345e-05	-0.56	1.6	-0.45	-0.78	1.66	1.51
ENSMUSG00000040181.14	Fmo1	FMO1	-2.21	0.38	5.24738e-05	0.000132866	-0.66	1.49	-0.82	-0.62	1.66	1.3
ENSMUSG00000026841.7	Fibcd1	FIBCD1	-2.21	-3.11	0.0104014	0.0139679	-3.61	-1.9	-3.3	-5.12	-1.98	-2.03
ENSMUSG00000035172.15	Plekhh3	PLEKHH3	-2.2	4.47	6.22222e-08	2.28585e-06	3.38	5.57	3.44	3.3	5.57	5.57
ENSMUSG00000053641.9	Dennd4a	DENND4A	-2.2	4.11	6.7237e-08	2.37737e-06	3.01	5.21	2.95	3.06	5.23	5.18
ENSMUSG00000039952.15	Dag1	DAG1	-2.2	6.09	1.84682e-07	3.39729e-06	5	7.19	4.87	5.12	7.17	7.21
ENSMUSG00000018417.14	Myo1b	MYO1B	-2.2	5.93	3.0122e-07	4.08607e-06	4.83	7.03	4.69	4.97	7.05	7.01
ENSMUSG00000008734.9	Gprc5b	GPRC5B	-2.2	4.88	7.16037e-07	6.28688e-06	3.79	5.97	3.6	3.96	6.01	5.94
ENSMUSG00000047227.5	Gm527	GM527	-2.2	0.63	1.71218e-05	5.41442e-05	-0.42	1.73	-0.52	-0.43	1.62	1.83
ENSMUSG00000015501.10	Hivep2	HIVEP2	-2.19	4.61	3.92111e-08	2.0527e-06	3.51	5.7	3.56	3.46	5.69	5.72
ENSMUSG00000021094.10	Dhrs7	DHRS7	-2.19	5.68	2.22388e-07	3.67245e-06	4.58	6.78	4.45	4.71	6.77	6.78
ENSMUSG00000022453.8	Naga	NAGA	-2.19	5.21	3.25954e-07	4.18313e-06	4.12	6.3	3.97	4.26	6.28	6.32
ENSMUSG00000047419.5	Cmya5	CMYA5	-2.19	-2.42	0.000772897	0.00132914	-3.16	-1.25	-3.48	-3.53	-1.27	-1.38
ENSMUSG00000020472.14	Zkscan17	ZKSCAN17	-2.18	5.77	1.31701e-08	1.58936e-06	4.69	6.87	4.68	4.69	6.86	6.87
ENSMUSG00000059248.13	2021-09-09	44448	-2.18	7.28	3.67423e-08	2.01158e-06	6.19	8.38	6.13	6.25	8.37	8.38
ENSMUSG00000017760.16	Ctsa	CTSA	-2.18	8.35	1.65089e-07	3.27157e-06	7.26	9.44	7.15	7.36	9.43	9.45
ENSMUSG00000025278.9	Flnb	FLNB	-2.18	8.95	1.954e-07	3.46096e-06	7.86	10.05	7.97	7.75	10.04	10.06
ENSMUSG00000018906.14	P4ha2	P4HA2	-2.18	6.64	2.73559e-07	3.91458e-06	5.54	7.73	5.41	5.68	7.72	7.74
ENSMUSG00000025150.10	Cbr2	CBR2	-2.18	4.11	4.73004e-07	5.06634e-06	3.03	5.21	2.87	3.18	5.22	5.19
ENSMUSG00000046229.10	Scand1	SCAND1	-2.18	4.49	9.11039e-07	7.24449e-06	3.4	5.58	3.59	3.21	5.58	5.58
ENSMUSG00000073421.6	H2-Ab1	H2-AB1	-2.18	-1.32	0.000378653	0.000705113	-2.24	-0.2	-2.44	-2.4	-0.44	-0.01
ENSMUSG00000019789.9	Hey2	HEY2	-2.18	-1.46	0.00050661	0.000911898	-2.36	-0.32	-2.53	-2.58	-0.61	-0.12
ENSMUSG00000030306.14	Tmtc1	TMTC1	-2.18	-2	0.000636796	0.00111882	-2.82	-0.86	-3.14	-3.05	-1.07	-0.75
ENSMUSG00000048249.14	Crebrf	CREBRF	-2.17	5.9	1.56656e-08	1.58936e-06	4.81	6.98	4.83	4.8	7	6.96
ENSMUSG00000024913.16	Lrp5	LRP5	-2.17	5.31	2.27677e-08	1.83367e-06	4.23	6.39	4.24	4.22	6.36	6.43
ENSMUSG00000063663.11	Brwd3	BRWD3	-2.17	4.38	3.38239e-08	1.94938e-06	3.29	5.46	3.28	3.31	5.48	5.45
ENSMUSG00000002083.13	Bbc3	BBC3	-2.17	5.11	1.81472e-07	3.36781e-06	4.02	6.19	3.9	4.14	6.16	6.22
ENSMUSG00000044167.6	Foxo1	FOXO1	-2.17	4.04	2.18331e-07	3.66236e-06	2.96	5.12	3.07	2.84	5.12	5.12
ENSMUSG00000040488.17	Ltbp4	LTBP4	-2.17	4.59	1.44082e-06	9.4827e-06	3.51	5.68	3.72	3.3	5.66	5.7
ENSMUSG00000024924.14	Vldlr	VLDLR	-2.16	5.59	1.88427e-08	1.6728e-06	4.52	6.67	4.48	4.55	6.67	6.67
ENSMUSG00000028149.12	Rap1gds1	RAP1GDS1	-2.16	6.23	2.35975e-08	1.86465e-06	5.16	7.31	5.11	5.2	7.31	7.32
ENSMUSG00000044147.8	Arf6	ARF6	-2.16	7.56	5.34978e-08	2.23623e-06	6.48	8.64	6.41	6.55	8.64	8.65
ENSMUSG00000013076.17	Amotl1	AMOTL1	-2.16	6.63	6.59284e-08	2.35495e-06	5.55	7.7	5.63	5.46	7.7	7.71
ENSMUSG00000027803.14	Wwtr1	WWTR1	-2.16	6.81	2.53433e-07	3.80131e-06	5.73	7.88	5.6	5.86	7.89	7.88
ENSMUSG00000072214.7	2021-09-05	44444	-2.16	2.74	3.16104e-07	4.11718e-06	1.68	3.83	1.68	1.65	3.8	3.84
ENSMUSG00000023043.7	Krt18	KRT18	-2.16	8.26	3.80585e-07	4.49046e-06	7.18	9.34	7.05	7.31	9.3	9.37
ENSMUSG00000022425.16	Enpp2	ENPP2	-2.16	2.67	2.98312e-06	1.53437e-05	1.6	3.75	1.46	1.73	3.86	3.64
ENSMUSG00000020181.17	Nav3	NAV3	-2.16	1.95	1.14074e-05	3.96027e-05	0.89	3.03	1.14	0.61	3.02	3.03
ENSMUSG00000059430.14	Actg2	ACTG2	-2.16	-3.02	0.00174729	0.00275618	-3.59	-1.84	-3.93	-4.27	-1.98	-1.9
ENSMUSG00000059343.4	Aldoart1	ALDOART1	-2.16	-2.3	0.00243433	0.00371491	-3.04	-1.15	-3.93	-2.84	-1.23	-1.21
ENSMUSG00000020178.6	Adora2a	ADORA2A	-2.16	-3.22	0.00870223	0.0118379	-3.68	-2.01	-5.07	-3.53	-2.24	-2.03
ENSMUSG00000041852.15	Tcf20	TCF20	-2.15	8.81	7.69761e-08	2.44456e-06	7.73	9.89	7.66	7.81	9.89	9.88
ENSMUSG00000031748.16	Gnao1	GNAO1	-2.15	2.16	9.28557e-07	7.30519e-06	1.1	3.24	1.1	1.06	3.27	3.2
ENSMUSG00000028039.11	Efna3	EFNA3	-2.15	1.83	5.03606e-06	2.19165e-05	0.78	2.9	0.65	0.87	3.01	2.8
ENSMUSG00000020905.11	Usp43	USP43	-2.15	0.54	1.32909e-05	4.44822e-05	-0.48	1.62	-0.55	-0.52	1.61	1.62
ENSMUSG00000048988.8	Elfn1	ELFN1	-2.15	-0.92	0.000186966	0.000384585	-1.86	0.18	-1.9	-2.08	0.03	0.29
ENSMUSG00000073418.4	C4b	C4B	-2.15	-2.22	0.000717444	0.00124519	-2.98	-1.08	-3.43	-3.16	-1.14	-1.14
ENSMUSG00000069814.6	Ccdc92b	CCDC92B	-2.15	-2.29	0.00123654	0.00201975	-3.04	-1.15	-3.69	-3.05	-1.14	-1.29
ENSMUSG00000037992.16	Rara	RARA	-2.14	5.59	1.55712e-08	1.58936e-06	4.53	6.66	4.53	4.51	6.66	6.67
ENSMUSG00000033396.13	Spg11	SPG11	-2.14	5.55	1.66621e-08	1.61033e-06	4.48	6.62	4.49	4.47	6.6	6.63
ENSMUSG00000024533.17	Spire1	SPIRE1	-2.14	5.7	2.04655e-08	1.74918e-06	4.63	6.77	4.6	4.67	6.78	6.76
ENSMUSG00000026519.16	Tmem63a	TMEM63A	-2.14	4.72	3.01007e-08	1.91597e-06	3.65	5.79	3.61	3.67	5.8	5.78
ENSMUSG00000024137.9	E4f1	E4F1	-2.14	4.76	6.07563e-08	2.26838e-06	3.7	5.83	3.76	3.62	5.83	5.83
ENSMUSG00000032216.15	Nedd4	NEDD4	-2.14	10.39	8.15047e-07	6.7401e-06	9.32	11.46	9.17	9.47	11.46	11.46
ENSMUSG00000068966.10	Zbtb34	ZBTB34	-2.14	2.26	2.39015e-05	7.07455e-05	1.21	3.34	1.52	0.87	3.39	3.27
ENSMUSG00000022562.15	Oplah	OPLAH	-2.14	-0.9	0.000158006	0.000332138	-1.83	0.2	-2.11	-1.83	0.14	0.21
ENSMUSG00000071713.6	Csf2rb	CSF2RB	-2.14	-2.37	0.00690986	0.00958864	-3.07	-1.25	-2.87	-3.98	-0.85	-1.78
ENSMUSG00000035765.10	Dym	DYM	-2.13	4.06	5.70095e-08	2.257e-06	3	5.12	3.03	2.97	5.13	5.11
ENSMUSG00000005718.8	Tfap4	TFAP4	-2.13	5.43	7.14078e-08	2.40527e-06	4.37	6.5	4.28	4.45	6.51	6.48
ENSMUSG00000033373.16	Fntb	FNTB	-2.13	3.85	3.3618e-07	4.25783e-06	2.79	4.92	2.67	2.9	4.89	4.96
ENSMUSG00000001281.10	Itgb7	ITGB7	-2.13	4.14	1.01933e-06	7.7156e-06	3.08	5.21	2.89	3.26	5.2	5.21
ENSMUSG00000039652.16	Cpeb3	CPEB3	-2.13	0.84	1.54273e-05	4.99558e-05	-0.18	1.92	-0.38	-0.07	1.88	1.95
ENSMUSG00000027656.7	Ccn5	CCN5	-2.13	-1.08	0.0013071	0.00212012	-1.98	0.01	-1.78	-2.49	0.31	-0.36
ENSMUSG00000034910.5	Pygo1	PYGO1	-2.13	-2.81	0.0125417	0.01662	-3.41	-1.62	-4.58	-3.19	-2.24	-1.21
ENSMUSG00000038013.14	Wipf2	WIPF2	-2.12	3.48	1.06797e-06	7.88366e-06	2.44	4.54	2.6	2.26	4.55	4.53
ENSMUSG00000023017.10	Asic1	ASIC1	-2.12	1.31	4.80823e-06	2.1219e-05	0.28	2.38	0.17	0.33	2.36	2.39
ENSMUSG00000073102.7	Drc1	DRC1	-2.12	-2.31	0.00376982	0.00551257	-3.02	-1.19	-2.75	-3.98	-1.14	-1.38
ENSMUSG00000038909.16	Kat7	KAT7	-2.11	6.11	1.54556e-08	1.58936e-06	5.06	7.17	5.05	5.07	7.16	7.18
ENSMUSG00000022389.15	Tef	TEF	-2.11	5.69	2.14893e-08	1.80573e-06	4.63	6.75	4.6	4.67	6.74	6.75
ENSMUSG00000050565.16	Tor1aip2	TOR1AIP2	-2.11	8.15	2.41456e-07	3.74592e-06	7.1	9.2	6.98	7.21	9.21	9.19
ENSMUSG00000030718.9	Ppme1	PPME1	-2.11	6.28	5.62933e-07	5.5765e-06	5.23	7.34	5.08	5.38	7.36	7.32
ENSMUSG00000027523.20	Gnas	GNAS	-2.11	9.17	7.11009e-07	6.26886e-06	8.12	10.22	7.97	8.26	10.23	10.21
ENSMUSG00000032511.17	Scn5a	SCN5A	-2.11	1.74	5.57466e-06	2.35847e-05	0.7	2.8	0.73	0.64	2.68	2.92
ENSMUSG00000024163.17	Mapk8ip3	MAPK8IP3	-2.11	6.95	8.10435e-06	3.07901e-05	5.89	8	6.16	5.63	8.01	7.99
ENSMUSG00000030657.11	Xylt1	XYLT1	-2.11	-2.37	0.00142027	0.0022851	-3.08	-1.25	-3.48	-3.35	-1.07	-1.56
ENSMUSG00000019767.12	Ccdc170	CCDC170	-2.11	-1.99	0.00152155	0.00243184	-2.78	-0.87	-3.3	-2.8	-1.2	-0.64
ENSMUSG00000040009.6	Gnaz	GNAZ	-2.11	-2.51	0.00563972	0.00795615	-3.17	-1.36	-4.22	-2.92	-1.67	-1.21
ENSMUSG00000024974.10	Smc3	SMC3	-2.1	7.15	4.43519e-08	2.13688e-06	6.1	8.2	6.04	6.16	8.2	8.2
ENSMUSG00000001440.5	Kpnb1	KPNB1	-2.1	9.26	4.92938e-08	2.14675e-06	8.21	10.31	8.18	8.25	10.31	10.31
ENSMUSG00000004364.14	Cul3	CUL3	-2.1	7.47	1.26614e-07	2.96241e-06	6.42	8.52	6.32	6.51	8.52	8.51
ENSMUSG00000033004.15	Mycbp2	MYCBP2	-2.1	5.73	3.02894e-07	4.09641e-06	4.67	6.78	4.81	4.54	6.79	6.77
ENSMUSG00000019577.6	Pdk4	PDK4	-2.1	4.25	3.82538e-07	4.5002e-06	3.21	5.3	3.07	3.34	5.3	5.3
ENSMUSG00000024002.18	Brd4	BRD4	-2.1	4.59	1.4527e-06	9.5141e-06	3.54	5.64	3.73	3.35	5.69	5.6
ENSMUSG00000026797.16	Stxbp1	STXBP1	-2.09	4.37	5.68408e-08	2.257e-06	3.34	5.42	3.32	3.34	5.46	5.38
ENSMUSG00000037896.17	Rcor1	RCOR1	-2.08	5.86	2.31045e-08	1.84895e-06	4.82	6.9	4.84	4.8	6.93	6.87
ENSMUSG00000024594.9	Prrc1	PRRC1	-2.08	4.57	5.60454e-08	2.24969e-06	3.54	5.62	3.48	3.58	5.63	5.6
ENSMUSG00000029502.14	Golga3	GOLGA3	-2.08	5.98	5.43492e-08	2.23623e-06	4.94	7.01	5.01	4.87	7.01	7.02
ENSMUSG00000030536.10	Iqgap1	IQGAP1	-2.08	8.46	1.70203e-07	3.29773e-06	7.42	9.5	7.32	7.51	9.5	9.5
ENSMUSG00000036568.7	Bicral	BICRAL	-2.08	3.25	3.2803e-07	4.19107e-06	2.22	4.29	2.25	2.18	4.35	4.23
ENSMUSG00000000531.5	Grasp	GRASP	-2.08	2.96	4.46306e-07	4.91446e-06	1.94	4	2	1.85	3.98	4.03
ENSMUSG00000024899.7	Papss2	PAPSS2	-2.08	-2.71	0.0123482	0.016393	-3.29	-1.58	-2.87	-4.63	-1.87	-1.47
ENSMUSG00000031592.10	Pcm1	PCM1	-2.07	6.95	2.04388e-08	1.74918e-06	5.91	7.98	5.92	5.9	8	7.97
ENSMUSG00000035530.13	Eif1	EIF1	-2.07	8.1	3.3669e-08	1.94938e-06	7.07	9.14	7.04	7.1	9.16	9.12
ENSMUSG00000006281.8	Tep1	TEP1	-2.07	4.59	3.64836e-07	4.39482e-06	3.55	5.62	3.68	3.41	5.61	5.64
ENSMUSG00000033278.10	Ptprm	PTPRM	-2.07	2.3	7.81343e-07	6.6195e-06	1.29	3.34	1.26	1.28	3.35	3.33
ENSMUSG00000021258.10	Ccnk	CCNK	-2.07	3.32	2.23882e-06	1.26506e-05	2.3	4.36	2.48	2.1	4.38	4.32
ENSMUSG00000028634.17	Hivep3	HIVEP3	-2.07	1.11	6.64541e-05	0.000160966	0.12	2.16	0.42	-0.26	2.15	2.14
ENSMUSG00000053522.11	Lgals7	LGALS7	-2.07	-2.28	0.012117	0.0161082	-2.95	-1.17	-2.35	-4.27	-1.27	-1.21
ENSMUSG00000022463.8	Srebf2	SREBF2	-2.06	6.83	1.98385e-08	1.73091e-06	5.8	7.86	5.78	5.81	7.85	7.86
ENSMUSG00000042207.17	Kdm5b	KDM5B	-2.06	7	2.00857e-08	1.74039e-06	5.96	8.03	5.98	5.95	8.03	8.03
ENSMUSG00000061175.11	Fnip2	FNIP2	-2.06	5.75	3.14204e-08	1.92224e-06	4.71	6.78	4.76	4.67	6.78	6.78
ENSMUSG00000000439.9	Mkrn2	MKRN2	-2.06	4.91	6.91683e-08	2.39853e-06	3.89	5.94	3.81	3.96	5.95	5.93
ENSMUSG00000003752.9	Itpkc	ITPKC	-2.06	4.12	9.26439e-08	2.63941e-06	3.09	5.16	3.04	3.15	5.17	5.14
ENSMUSG00000025793.17	Hgs	HGS	-2.06	5.51	1.38683e-07	3.04954e-06	4.48	6.54	4.38	4.59	6.54	6.55
ENSMUSG00000031066.10	Usp11	USP11	-2.06	4.02	2.48415e-07	3.78112e-06	2.99	5.05	2.93	3.05	5.12	4.98
ENSMUSG00000034993.7	Vat1	VAT1	-2.06	7.14	3.69742e-07	4.42002e-06	6.11	8.16	5.98	6.24	8.18	8.15
ENSMUSG00000017493.12	Igfbp4	IGFBP4	-2.06	9.14	7.2787e-07	6.3595e-06	8.11	10.16	7.96	8.25	10.17	10.16
ENSMUSG00000026809.15	Spaca9	SPACA9	-2.06	-2.39	0.00295637	0.0044182	-3.07	-1.29	-3.93	-2.92	-1.34	-1.38
ENSMUSG00000051695.6	Pcbp1	PCBP1	-2.05	7.35	3.65711e-08	2.01158e-06	6.34	8.38	6.28	6.38	8.38	8.38
ENSMUSG00000024661.7	Fth1	FTH1	-2.05	8.95	5.00635e-08	2.14675e-06	7.92	9.98	7.89	7.95	9.99	9.96
ENSMUSG00000026279.14	Thap4	THAP4	-2.05	5.79	5.46421e-08	2.23623e-06	4.76	6.81	4.69	4.83	6.8	6.82
ENSMUSG00000020716.16	Nf1	NF1	-2.05	5.55	3.13714e-07	4.11718e-06	4.52	6.57	4.64	4.4	6.62	6.52
ENSMUSG00000028755.3	Cda	CDA	-2.05	4.62	3.736e-07	4.45193e-06	3.6	5.65	3.47	3.71	5.6	5.7
ENSMUSG00000096883.2	Shisa8	SHISA8	-2.05	-0.27	8.41189e-05	0.000195572	-1.21	0.77	-1.33	-1.25	0.86	0.65
ENSMUSG00000025498.15	Irf7	IRF7	-2.05	-2.24	0.00174584	0.00275424	-2.96	-1.14	-3	-3.53	-1.42	-1
ENSMUSG00000027886.7	1700013F07Rik	1700013F07RIK	-2.05	-2.69	0.00833638	0.0113908	-3.32	-1.56	-3.93	-3.53	-2.24	-1.07
ENSMUSG00000022641.15	Bbx	BBX	-2.04	6.26	2.99582e-08	1.91597e-06	5.24	7.29	5.2	5.28	7.29	7.28
ENSMUSG00000039646.5	Vasn	VASN	-2.04	6.14	3.08122e-08	1.92224e-06	5.12	7.16	5.08	5.17	7.15	7.17
ENSMUSG00000038774.9	Ascc3	ASCC3	-2.04	6.32	7.04796e-08	2.40527e-06	5.3	7.34	5.37	5.23	7.32	7.36
ENSMUSG00000055296.14	Tmem245	TMEM245	-2.04	5.51	1.55923e-07	3.19294e-06	4.49	6.54	4.6	4.39	6.53	6.54
ENSMUSG00000015850.11	Adamtsl4	ADAMTSL4	-2.04	1.66	7.25886e-06	2.85805e-05	0.66	2.68	0.81	0.47	2.69	2.68
ENSMUSG00000020810.5	Cygb	CYGB	-2.04	0.09	4.22508e-05	0.000111591	-0.86	1.13	-1.02	-0.84	1.11	1.12
ENSMUSG00000047787.8	Flrt1	FLRT1	-2.04	-0.51	0.000128559	0.00027839	-1.44	0.53	-1.61	-1.46	0.4	0.61
ENSMUSG00000015149.14	Sirt2	SIRT2	-2.03	5.25	4.3948e-08	2.13688e-06	4.23	6.26	4.18	4.29	6.26	6.27
ENSMUSG00000025332.14	Kdm5c	KDM5C	-2.03	6.59	4.64532e-08	2.14675e-06	5.58	7.61	5.63	5.53	7.58	7.63
ENSMUSG00000041895.15	Wipi1	WIPI1	-2.03	4.83	2.57956e-07	3.81738e-06	3.81	5.85	3.69	3.93	5.86	5.83
ENSMUSG00000024050.17	Wiz	WIZ	-2.03	4.27	3.39494e-07	4.27586e-06	3.25	5.28	3.37	3.13	5.26	5.3
ENSMUSG00000001424.14	Snd1	SND1	-2.03	7.87	3.92468e-07	4.56148e-06	6.86	8.89	6.73	6.98	8.88	8.89
ENSMUSG00000033124.15	Atg9a	ATG9A	-2.02	4.92	4.29656e-08	2.13688e-06	3.92	5.93	3.93	3.89	5.96	5.9
ENSMUSG00000020021.4	Fgd6	FGD6	-2.02	4.78	5.92815e-08	2.26838e-06	3.78	5.8	3.83	3.72	5.79	5.8
ENSMUSG00000028776.14	Tinagl1	TINAGL1	-2.02	7.11	6.35031e-08	2.31838e-06	6.1	8.11	6.03	6.17	8.12	8.11
ENSMUSG00000025139.14	Tollip	TOLLIP	-2.02	6.3	2.00239e-07	3.48607e-06	5.3	7.31	5.19	5.4	7.31	7.31
ENSMUSG00000032898.9	Fbxo21	FBXO21	-2.02	5.81	3.23039e-07	4.16954e-06	4.8	6.83	4.67	4.93	6.82	6.83
ENSMUSG00000031561.16	Tenm3	TENM3	-2.02	4.49	4.30681e-07	4.79881e-06	3.49	5.5	3.61	3.34	5.49	5.51
ENSMUSG00000035547.14	Capn5	CAPN5	-2.02	4.2	5.54316e-07	5.55318e-06	3.19	5.21	3.05	3.32	5.23	5.18
ENSMUSG00000031840.12	Rab3a	RAB3A	-2.02	1.97	1.75001e-06	1.07359e-05	0.98	2.98	0.94	0.97	2.95	3.01
ENSMUSG00000050751.14	Pgbd5	PGBD5	-2.02	0.41	3.89585e-05	0.000104544	-0.55	1.43	-0.5	-0.7	1.33	1.51
ENSMUSG00000062257.13	Opcml	OPCML	-2.02	-2.2	0.00201179	0.00312244	-2.9	-1.14	-2.87	-3.53	-1.01	-1.38
ENSMUSG00000051243.14	Islr2	ISLR2	-2.02	-3.15	0.00447095	0.00643743	-3.62	-2.02	-4.58	-3.74	-2.11	-2.17
ENSMUSG00000032243.8	Itga11	ITGA11	-2.02	-2.75	0.019182	0.0246475	-3.29	-1.66	-2.87	-4.63	-1.34	-2.17
ENSMUSG00000002812.4	Flii	FLII	-2.01	6.13	2.2276e-08	1.81603e-06	5.13	7.13	5.11	5.15	7.13	7.14
ENSMUSG00000018395.19	Kif3a	KIF3A	-2.01	4.02	8.62925e-08	2.56307e-06	3.02	5.03	2.98	3.05	5.03	5.02
ENSMUSG00000040957.15	Cables1	CABLES1	-2.01	3.31	2.21048e-07	3.67191e-06	2.32	4.31	2.27	2.35	4.32	4.31
ENSMUSG00000022629.17	Kif21a	KIF21A	-2.01	4.24	2.33974e-07	3.71408e-06	3.24	5.24	3.29	3.17	5.17	5.31
ENSMUSG00000001098.15	Kctd10	KCTD10	-2.01	8.35	4.68312e-07	5.03756e-06	7.34	9.35	7.22	7.47	9.36	9.34
ENSMUSG00000073411.11	H2-D1	H2-D1	-2.01	5.23	1.26387e-06	8.74411e-06	4.23	6.24	4.04	4.4	6.24	6.23
ENSMUSG00000026494.12	Kif26b	KIF26B	-2.01	5.1	1.46981e-06	9.56826e-06	4.1	6.11	4.28	3.92	6.06	6.15
ENSMUSG00000038068.15	Rnf144b	RNF144B	-2.01	2.2	4.28953e-06	1.95835e-05	1.21	3.21	1.02	1.36	3.21	3.22
ENSMUSG00000103034.1	Gm8797	GM8797	-2.01	-0.35	0.000148316	0.000314505	-1.27	0.68	-1.28	-1.45	0.51	0.81
ENSMUSG00000044788.10	Fads6	FADS6	-2.01	-1.07	0.000418469	0.000770013	-1.93	-0.03	-1.84	-2.31	-0.15	0.02
ENSMUSG00000052981.6	Ube2ql1	UBE2QL1	-2.01	-2.33	0.00154119	0.00246043	-3.02	-1.25	-3.48	-3.19	-1.5	-1.14
ENSMUSG00000033960.6	Jcad	JCAD	-2	5.14	4.07527e-08	2.08623e-06	4.14	6.15	4.17	4.11	6.12	6.17
ENSMUSG00000032562.13	Gnai2	GNAI2	-2	7.8	3.60129e-07	4.38877e-06	6.8	8.8	6.68	6.92	8.79	8.81
ENSMUSG00000031155.16	Pim2	PIM2	-2	3.3	6.50239e-07	5.99384e-06	2.31	4.3	2.21	2.39	4.35	4.25
ENSMUSG00000027253.15	Lrp4	LRP4	-2	2.01	1.67541e-06	1.04727e-05	1.02	3.01	1.05	0.97	3	3.02
ENSMUSG00000028226.15	Mmp16	MMP16	-2	0.2	6.40325e-05	0.000156123	-0.74	1.21	-0.62	-0.96	1.26	1.14
ENSMUSG00000004791.7	Pgf	PGF	-2	-0.07	0.000133674	0.000287927	-1	0.95	-1.33	-0.81	0.95	0.93
ENSMUSG00000050737.13	Ptges	PTGES	-2	1.45	0.000107139	0.000238924	0.47	2.46	0.06	0.83	2.41	2.49
ENSMUSG00000020357.3	Flt4	FLT4	-2	-0.24	0.000168849	0.000351694	-1.16	0.77	-0.98	-1.51	0.75	0.76
ENSMUSG00000042106.5	Inka1	INKA1	-2	-0.67	0.000302202	0.000579143	-1.56	0.36	-1.84	-1.51	0.17	0.52
ENSMUSG00000036862.15	Dchs1	DCHS1	-2	-0.42	0.00124394	0.00203024	-1.31	0.59	-1.05	-1.77	0.9	0.24
ENSMUSG00000021998.16	Lcp1	LCP1	-2	-2.74	0.00239101	0.00365502	-3.32	-1.65	-3.93	-3.53	-1.58	-1.9
ENSMUSG00000034707.7	Gns	GNS	-1.99	6.3	3.01943e-08	1.91597e-06	5.3	7.29	5.27	5.34	7.28	7.31
ENSMUSG00000078429.9	Ctdsp2	CTDSP2	-1.99	7.09	3.21026e-08	1.92224e-06	6.09	8.09	6.06	6.12	8.09	8.08
ENSMUSG00000068015.8	Lrch1	LRCH1	-1.99	4.38	5.9352e-08	2.26838e-06	3.39	5.38	3.42	3.36	5.38	5.38
ENSMUSG00000040524.9	Zfp609	ZFP609	-1.99	5.22	7.48004e-08	2.42643e-06	4.23	6.22	4.3	4.16	6.21	6.23
ENSMUSG00000053333.15	Dis3l2	DIS3L2	-1.99	3.74	1.31327e-07	2.96241e-06	2.75	4.74	2.74	2.76	4.77	4.71
ENSMUSG00000007950.9	Abhd8	ABHD8	-1.99	5.09	1.30507e-07	2.96241e-06	4.09	6.08	4	4.18	6.08	6.09
ENSMUSG00000014077.13	Chp1	CHP1	-1.99	6.31	2.67013e-07	3.86794e-06	5.31	7.31	5.2	5.43	7.33	7.29
ENSMUSG00000033530.8	Ttc7b	TTC7B	-1.99	3.46	4.19804e-07	4.72109e-06	2.46	4.46	2.37	2.56	4.44	4.47
ENSMUSG00000073062.3	Zxdb	ZXDB	-1.99	3.95	4.60297e-07	5.00708e-06	2.96	4.95	3.07	2.84	4.92	4.98
ENSMUSG00000026827.12	Gpd2	GPD2	-1.99	5.58	5.0215e-07	5.22269e-06	4.58	6.57	4.44	4.72	6.55	6.6
ENSMUSG00000039824.4	Myl6b	MYL6B	-1.99	0.13	0.000190612	0.000390964	-0.81	1.14	-1.05	-0.7	0.92	1.34
ENSMUSG00000047261.9	Gap43	GAP43	-1.99	-2.31	0.00263499	0.00398339	-2.98	-1.25	-2.87	-3.74	-1.34	-1.29
ENSMUSG00000000278.10	Scpep1	SCPEP1	-1.98	7.3	5.09348e-08	2.17668e-06	6.3	8.29	6.26	6.35	8.26	8.32
ENSMUSG00000032245.12	Cln6	CLN6	-1.98	4.09	7.14192e-07	6.28688e-06	3.1	5.08	2.96	3.24	5.07	5.1
ENSMUSG00000015711.8	Prune1	PRUNE1	-1.98	5.12	7.4863e-07	6.46416e-06	4.13	6.12	3.97	4.29	6.11	6.12
ENSMUSG00000070691.10	Runx3	RUNX3	-1.98	2.37	4.429e-06	2.00526e-05	1.4	3.37	1.54	1.22	3.3	3.43
ENSMUSG00000034177.15	Rnf43	RNF43	-1.98	1.29	6.20289e-06	2.54683e-05	0.34	2.29	0.34	0.27	2.26	2.3
ENSMUSG00000035504.16	Reep6	REEP6	-1.98	1.55	1.26416e-05	4.28572e-05	0.58	2.54	0.7	0.41	2.45	2.63
ENSMUSG00000080115.3	Eef1akmt3	EEF1AKMT3	-1.98	-0.36	0.000134447	0.000289151	-1.27	0.65	-1.28	-1.42	0.51	0.76
ENSMUSG00000010021.13	Kif19a	KIF19A	-1.98	0.17	0.000252231	0.000497024	-0.76	1.17	-1.2	-0.45	1.16	1.15
ENSMUSG00000053797.10	Krt16	KRT16	-1.98	-2.88	0.00419702	0.00608696	-3.42	-1.78	-4.22	-3.53	-2.11	-1.67
ENSMUSG00000060279.14	Ap2a1	AP2A1	-1.97	6	2.56963e-08	1.86806e-06	5.01	6.99	5.02	5.01	6.97	7.01
ENSMUSG00000020044.13	Timp3	TIMP3	-1.97	6.74	2.61739e-08	1.86806e-06	5.75	7.72	5.77	5.73	7.71	7.73
ENSMUSG00000006005.18	Tpr	TPR	-1.97	7.68	3.51866e-08	2.00038e-06	6.7	8.66	6.71	6.68	8.68	8.64
ENSMUSG00000038485.6	Socs7	SOCS7	-1.97	5.24	4.23918e-08	2.12195e-06	4.25	6.22	4.3	4.21	6.22	6.23
ENSMUSG00000029592.11	Usp30	USP30	-1.97	5.12	5.74848e-08	2.257e-06	4.13	6.11	4.12	4.14	6.06	6.16
ENSMUSG00000024392.17	Bag6	BAG6	-1.97	7.12	1.01653e-07	2.73621e-06	6.13	8.11	6.21	6.06	8.1	8.12
ENSMUSG00000033400.14	Agl	AGL	-1.97	5.95	2.28942e-07	3.7079e-06	4.96	6.94	4.86	5.07	6.96	6.91
ENSMUSG00000019505.7	Ubb	UBB	-1.97	9.93	2.87137e-07	3.99274e-06	8.95	10.92	8.85	9.04	10.92	10.92
ENSMUSG00000045319.13	Proser2	PROSER2	-1.97	3.69	6.5283e-07	6.01331e-06	2.71	4.67	2.58	2.82	4.64	4.7
ENSMUSG00000020780.15	Srp68	SRP68	-1.97	6.22	7.0407e-07	6.22344e-06	5.24	7.21	5.09	5.39	7.21	7.21
ENSMUSG00000039262.16	Prrc2b	PRRC2B	-1.97	6.78	1.29714e-06	8.87169e-06	5.8	7.77	5.96	5.63	7.74	7.79
ENSMUSG00000089945.13	Pakap	PAKAP	-1.97	3.86	1.74476e-06	1.07194e-05	2.87	4.85	2.73	3	4.75	4.94
ENSMUSG00000066406.15	Akap13	AKAP13	-1.97	5.67	2.62262e-06	1.4084e-05	4.69	6.66	4.89	4.49	6.65	6.67
ENSMUSG00000032294.17	Pkm	PKM	-1.97	11.88	3.92207e-06	1.84419e-05	10.89	12.86	10.71	11.08	12.86	12.87
ENSMUSG00000043496.7	Tril	TRIL	-1.97	-3	0.00375993	0.00550067	-3.5	-1.92	-3.69	-4.27	-1.87	-2.17
ENSMUSG00000040811.15	Eml2	EML2	-1.97	-2.13	0.0228704	0.0290628	-2.78	-1.07	-4.22	-2.01	-1.27	-1
ENSMUSG00000048696.11	Mex3d	MEX3D	-1.96	6.7	3.72368e-08	2.01158e-06	5.71	7.67	5.69	5.74	7.64	7.7
ENSMUSG00000020315.18	Sptbn1	SPTBN1	-1.96	8.47	4.4456e-08	2.13688e-06	7.49	9.45	7.47	7.5	9.45	9.45
ENSMUSG00000021662.11	Arhgef28	ARHGEF28	-1.96	4.93	1.35624e-07	3.00526e-06	3.95	5.92	3.87	4.03	5.88	5.95
ENSMUSG00000026796.16	Fam129b	FAM129B	-1.96	7.52	1.55746e-07	3.19294e-06	6.54	8.5	6.45	6.63	8.49	8.51
ENSMUSG00000002413.15	Braf	BRAF	-1.96	4.46	1.66278e-07	3.27157e-06	3.48	5.45	3.57	3.4	5.46	5.43
ENSMUSG00000020647.10	Ncoa1	NCOA1	-1.96	3.29	2.1906e-07	3.66292e-06	2.32	4.28	2.32	2.3	4.28	4.27
ENSMUSG00000051343.11	Rab11fip5	RAB11FIP5	-1.96	5.02	2.37471e-07	3.71789e-06	4.04	6	3.95	4.14	6.05	5.96
ENSMUSG00000079487.11	Med12	MED12	-1.96	4.93	4.74715e-07	5.07978e-06	3.96	5.92	4.09	3.82	5.9	5.92
ENSMUSG00000053007.9	Creb5	CREB5	-1.96	2.56	9.70286e-07	7.5055e-06	1.6	3.55	1.65	1.52	3.52	3.56
ENSMUSG00000057729.12	Prtn3	PRTN3	-1.96	-0.87	0.000546452	0.00097537	-1.73	0.13	-1.61	-2.08	0.29	-0.08
ENSMUSG00000005034.15	Prkacb	PRKACB	-1.95	5.78	4.37941e-08	2.13688e-06	4.8	6.75	4.76	4.85	6.77	6.74
ENSMUSG00000067336.6	Bmpr2	BMPR2	-1.95	5.77	5.74728e-08	2.257e-06	4.8	6.75	4.85	4.75	6.78	6.72
ENSMUSG00000020610.16	Amz2	AMZ2	-1.95	5.14	7.01007e-08	2.40527e-06	4.17	6.12	4.11	4.23	6.11	6.13
ENSMUSG00000022971.18	Ifnar2	IFNAR2	-1.95	5.18	1.06812e-07	2.80165e-06	4.21	6.16	4.12	4.28	6.15	6.16
ENSMUSG00000028465.16	Tln1	TLN1	-1.95	7.31	1.39374e-07	3.05602e-06	6.34	8.29	6.42	6.25	8.28	8.29
ENSMUSG00000012114.17	Med15	MED15	-1.95	5.46	1.93087e-07	3.45954e-06	4.48	6.44	4.58	4.38	6.45	6.42
ENSMUSG00000063015.12	Ccni	CCNI	-1.95	8.33	2.03723e-07	3.50627e-06	7.35	9.3	7.26	7.44	9.32	9.28
ENSMUSG00000049339.16	Retreg2	RETREG2	-1.95	6.3	2.43593e-07	3.74592e-06	5.32	7.28	5.21	5.43	7.27	7.28
ENSMUSG00000041133.11	Smc1a	SMC1A	-1.95	6.76	4.15988e-07	4.70854e-06	5.79	7.73	5.66	5.91	7.73	7.73
ENSMUSG00000046541.9	Zfp526	ZFP526	-1.95	4.12	6.09849e-07	5.79709e-06	3.15	5.09	3.24	3.05	5.02	5.17
ENSMUSG00000032549.7	Rab6b	RAB6B	-1.95	1.45	4.75617e-06	2.10707e-05	0.5	2.43	0.49	0.47	2.42	2.43
ENSMUSG00000025355.7	Mmp19	MMP19	-1.95	2.24	1.0995e-05	3.84978e-05	1.28	3.21	1.04	1.49	3.24	3.19
ENSMUSG00000030134.11	Rasgef1a	RASGEF1A	-1.95	1.25	6.98828e-05	0.000167559	0.3	2.23	0.56	-0.01	2.12	2.34
ENSMUSG00000032340.8	Neo1	NEO1	-1.94	6.74	2.80018e-08	1.89148e-06	5.77	7.7	5.78	5.75	7.7	7.7
ENSMUSG00000031988.10	Vps26b	VPS26B	-1.94	6.79	1.77698e-07	3.33721e-06	5.81	7.76	5.72	5.91	7.76	7.75
ENSMUSG00000079037.9	Prnp	PRNP	-1.94	5.63	2.23684e-07	3.6806e-06	4.66	6.6	4.56	4.77	6.59	6.61
ENSMUSG00000062825.15	Actg1	ACTG1	-1.94	11.35	2.62955e-07	3.8508e-06	10.38	12.32	10.32	10.44	12.31	12.33
ENSMUSG00000018677.9	Slc25a39	SLC25A39	-1.94	7.3	2.67174e-07	3.86794e-06	6.34	8.27	6.23	6.44	8.28	8.26
ENSMUSG00000055932.15	Fto	FTO	-1.94	5.8	2.70769e-07	3.89238e-06	4.84	6.78	4.73	4.94	6.73	6.82
ENSMUSG00000038146.8	Notch3	NOTCH3	-1.94	3.72	4.22511e-07	4.73122e-06	2.76	4.7	2.85	2.65	4.71	4.67
ENSMUSG00000044477.12	Zfand3	ZFAND3	-1.94	5.44	4.30984e-07	4.79881e-06	4.47	6.4	4.34	4.6	6.43	6.38
ENSMUSG00000033249.10	Hsf4	HSF4	-1.94	2.36	1.07117e-06	7.89537e-06	1.4	3.33	1.4	1.38	3.34	3.31
ENSMUSG00000074643.12	Cpne1	CPNE1	-1.94	6.23	8.145e-07	6.7401e-06	5.26	7.21	5.11	5.41	7.21	7.2
ENSMUSG00000087370.3	Tmem170b	TMEM170B	-1.93	4.54	8.09988e-08	2.48819e-06	3.58	5.51	3.62	3.53	5.51	5.5
ENSMUSG00000020661.15	Dnmt3a	DNMT3A	-1.93	5.4	8.49153e-08	2.55846e-06	4.44	6.37	4.51	4.37	6.36	6.38
ENSMUSG00000044221.14	Grsf1	GRSF1	-1.93	7.87	1.13866e-07	2.86811e-06	6.91	8.84	6.84	6.98	8.85	8.83
ENSMUSG00000005312.15	Ubqln1	UBQLN1	-1.93	7.42	1.12844e-07	2.86811e-06	6.45	8.38	6.38	6.52	8.4	8.36
ENSMUSG00000032470.17	Mras	MRAS	-1.93	4.85	1.14936e-07	2.86811e-06	3.89	5.81	3.82	3.95	5.85	5.78
ENSMUSG00000034586.14	Hid1	HID1	-1.93	4.21	1.45868e-07	3.10786e-06	3.25	5.17	3.2	3.3	5.14	5.21
ENSMUSG00000020777.16	Acox1	ACOX1	-1.93	6.09	1.36072e-07	3.00987e-06	5.12	7.05	5.04	5.21	7.04	7.07
ENSMUSG00000034007.10	Scaper	SCAPER	-1.93	4.67	1.71475e-07	3.30133e-06	3.7	5.63	3.61	3.79	5.63	5.63
ENSMUSG00000028527.18	Ak4	AK4	-1.93	7.32	2.93617e-07	4.02516e-06	6.36	8.29	6.25	6.46	8.3	8.28
ENSMUSG00000026204.15	Ptprn	PTPRN	-1.93	3.8	3.61296e-07	4.38877e-06	2.84	4.77	2.92	2.76	4.73	4.81
ENSMUSG00000017119.19	Nbr1	NBR1	-1.93	6.68	6.40608e-07	5.93785e-06	5.71	7.64	5.58	5.85	7.66	7.62
ENSMUSG00000026837.15	Col5a1	COL5A1	-1.93	7.92	2.79013e-06	1.4695e-05	6.96	8.88	7.14	6.77	8.85	8.91
ENSMUSG00000002107.18	Celf2	CELF2	-1.93	1.84	1.77159e-05	5.55195e-05	0.9	2.81	0.71	1.04	2.93	2.68
ENSMUSG00000078716.10	Tmem8b	TMEM8B	-1.93	-0.17	0.000117425	0.000258195	-1.06	0.8	-1.02	-1.25	0.89	0.7
ENSMUSG00000025175.12	Fn3k	FN3K	-1.93	-1.19	0.00138495	0.00223656	-2	-0.19	-1.72	-2.58	-0.32	-0.12
ENSMUSG00000032998.16	Foxj3	FOXJ3	-1.92	5.69	3.25273e-08	1.93684e-06	4.72	6.64	4.74	4.71	6.66	6.63
ENSMUSG00000027465.13	Tbc1d20	TBC1D20	-1.92	5.62	3.89238e-08	2.05267e-06	4.66	6.58	4.62	4.69	6.57	6.58
ENSMUSG00000031691.14	Tnpo2	TNPO2	-1.92	7.3	5.714e-08	2.257e-06	6.34	8.25	6.39	6.29	8.26	8.25
ENSMUSG00000009035.15	Tmem184b	TMEM184B	-1.92	4.69	7.69366e-08	2.44456e-06	3.73	5.65	3.68	3.78	5.64	5.67
ENSMUSG00000041180.13	Hectd2	HECTD2	-1.92	3	7.69034e-07	6.55505e-06	2.05	3.97	2.09	1.99	4.02	3.9
ENSMUSG00000018678.13	Sp2	SP2	-1.92	1.44	9.22027e-06	3.38427e-05	0.51	2.41	0.57	0.4	2.33	2.47
ENSMUSG00000024053.11	Emilin2	EMILIN2	-1.92	0.84	2.1828e-05	6.55937e-05	-0.08	1.82	-0.21	-0.02	1.75	1.86
ENSMUSG00000028195.4	Ccn1	CCN1	-1.91	7.12	5.43694e-08	2.23623e-06	6.17	8.07	6.21	6.12	8.06	8.08
ENSMUSG00000044068.7	Zrsr1	ZRSR1	-1.91	4.31	1.16423e-07	2.86811e-06	3.36	5.26	3.3	3.41	5.26	5.27
ENSMUSG00000020886.17	Dlg4	DLG4	-1.91	4.75	1.31056e-07	2.96241e-06	3.8	5.71	3.87	3.73	5.73	5.69
ENSMUSG00000025762.15	Larp1b	LARP1B	-1.91	3.35	4.61047e-07	5.00927e-06	2.4	4.3	2.45	2.34	4.35	4.25
ENSMUSG00000022000.11	Zc3h13	ZC3H13	-1.91	4.33	5.55591e-07	5.55768e-06	3.38	5.29	3.5	3.25	5.26	5.31
ENSMUSG00000024431.15	Nr3c1	NR3C1	-1.91	6.48	1.03545e-06	7.76434e-06	5.53	7.44	5.37	5.68	7.43	7.45
ENSMUSG00000034855.13	Cxcl10	CXCL10	-1.91	-0.02	7.56923e-05	0.000178826	-0.9	0.96	-0.88	-1.06	0.9	0.98
ENSMUSG00000001588.12	Acap1	ACAP1	-1.91	-0.21	0.000156356	0.000329165	-1.09	0.76	-1.37	-0.96	0.77	0.72
ENSMUSG00000020101.14	Vsir	VSIR	-1.91	0.34	0.000171579	0.000356693	-0.57	1.31	-0.73	-0.52	1.08	1.53
ENSMUSG00000024456.16	Diaph1	DIAPH1	-1.9	5.37	3.64404e-08	2.01158e-06	4.42	6.32	4.44	4.4	6.32	6.32
ENSMUSG00000024589.18	Nedd4l	NEDD4L	-1.9	4.79	4.84676e-08	2.14675e-06	3.84	5.75	3.83	3.85	5.74	5.75
ENSMUSG00000002983.17	Relb	RELB	-1.9	4.53	5.94389e-08	2.26838e-06	3.58	5.48	3.58	3.58	5.49	5.47
ENSMUSG00000007836.6	Hnrnpa0	HNRNPA0	-1.9	7.69	5.84757e-08	2.26838e-06	6.74	8.64	6.7	6.78	8.65	8.63
ENSMUSG00000092035.8	Peg10	PEG10	-1.9	5.84	1.05112e-07	2.78026e-06	4.89	6.8	4.96	4.82	6.82	6.77
ENSMUSG00000041168.10	Lonp1	LONP1	-1.9	7.47	1.9495e-07	3.46096e-06	6.52	8.43	6.43	6.61	8.4	8.45
ENSMUSG00000042870.15	Tom1	TOM1	-1.9	3.46	2.85246e-07	3.99274e-06	2.52	4.41	2.52	2.51	4.45	4.37
ENSMUSG00000016382.15	Pls3	PLS3	-1.9	6.65	4.96219e-07	5.19975e-06	5.7	7.6	5.58	5.83	7.61	7.59
ENSMUSG00000042851.17	Zc3h6	ZC3H6	-1.9	2.43	3.32917e-06	1.65196e-05	1.5	3.38	1.62	1.36	3.34	3.43
ENSMUSG00000029716.13	Tfr2	TFR2	-1.9	-0.05	0.00014982	0.0003172	-0.94	0.92	-0.88	-1.14	0.75	1.04
ENSMUSG00000039476.13	Prrx2	PRRX2	-1.89	5.03	4.07014e-08	2.08623e-06	4.09	5.97	4.09	4.09	5.97	5.98
ENSMUSG00000051675.13	Trim32	TRIM32	-1.89	5.38	1.15462e-07	2.86811e-06	4.44	6.33	4.36	4.51	6.33	6.32
ENSMUSG00000018909.15	Arrb1	ARRB1	-1.89	5.85	1.71583e-07	3.30133e-06	4.9	6.79	4.99	4.81	6.78	6.8
ENSMUSG00000049577.15	Zfpm1	ZFPM1	-1.89	3.19	3.74983e-07	4.45301e-06	2.26	4.14	2.28	2.22	4.11	4.16
ENSMUSG00000049516.9	Spty2d1	SPTY2D1	-1.89	5.34	6.28096e-07	5.88673e-06	4.39	6.29	4.26	4.53	6.31	6.26
ENSMUSG00000063382.6	Bcl9l	BCL9L	-1.89	5.02	3.19499e-06	1.60793e-05	4.08	5.97	4.28	3.88	5.96	5.98
ENSMUSG00000028556.15	Dock7	DOCK7	-1.88	6.4	4.63382e-08	2.14675e-06	5.46	7.34	5.42	5.5	7.34	7.34
ENSMUSG00000007029.16	Vars	VARS	-1.88	8.17	5.45537e-08	2.23623e-06	7.23	9.11	7.24	7.22	9.09	9.13
ENSMUSG00000043241.14	Upf2	UPF2	-1.88	5.09	5.85495e-08	2.26838e-06	4.15	6.03	4.14	4.17	6.06	6
ENSMUSG00000036620.14	Mgat4b	MGAT4B	-1.88	6.84	9.35482e-08	2.64794e-06	5.9	7.78	5.83	5.96	7.75	7.8
ENSMUSG00000030876.7	Mettl9	METTL9	-1.88	7.04	1.04538e-07	2.78026e-06	6.1	7.99	6.03	6.17	7.98	7.99
ENSMUSG00000007670.10	Khsrp	KHSRP	-1.88	6.95	1.93876e-07	3.45954e-06	6.01	7.89	6.1	5.92	7.9	7.88
ENSMUSG00000042390.9	Gatad2b	GATAD2B	-1.88	5.21	2.30109e-07	3.7079e-06	4.27	6.16	4.37	4.17	6.16	6.15
ENSMUSG00000057530.14	Ece1	ECE1	-1.88	4.59	3.11783e-07	4.11718e-06	3.65	5.53	3.55	3.75	5.53	5.52
ENSMUSG00000003665.7	Has1	HAS1	-1.88	3.19	6.71952e-07	6.10883e-06	2.25	4.12	2.23	2.26	4.06	4.19
ENSMUSG00000027966.20	Col11a1	COL11A1	-1.88	1.36	7.1273e-06	2.82573e-05	0.44	2.3	0.4	0.44	2.32	2.27
ENSMUSG00000030002.15	Dusp11	DUSP11	-1.87	7.08	3.59094e-08	2.01158e-06	6.15	8.02	6.15	6.15	8.02	8.02
ENSMUSG00000035203.16	Epn1	EPN1	-1.87	6.1	4.79777e-08	2.14675e-06	5.17	7.04	5.14	5.2	7.01	7.07
ENSMUSG00000079614.4	Seh1l	SEH1L	-1.87	7.64	8.58e-08	2.56307e-06	6.7	8.57	6.65	6.76	8.57	8.58
ENSMUSG00000026565.18	Pou2f1	POU2F1	-1.87	4.79	1.13647e-07	2.86811e-06	3.86	5.72	3.9	3.81	5.76	5.68
ENSMUSG00000022003.7	Slc25a30	SLC25A30	-1.87	6.6	2.43055e-07	3.74592e-06	5.66	7.53	5.57	5.76	7.53	7.53
ENSMUSG00000075595.9	Zfp652	ZFP652	-1.87	5.25	3.04632e-07	4.10046e-06	4.31	6.19	4.42	4.21	6.22	6.15
ENSMUSG00000064105.13	Cnnm2	CNNM2	-1.87	3.41	3.55279e-07	4.36337e-06	2.48	4.34	2.43	2.51	4.31	4.38
ENSMUSG00000029752.12	Asns	ASNS	-1.87	7.24	6.11097e-07	5.79896e-06	6.3	8.18	6.18	6.43	8.17	8.19
ENSMUSG00000025237.16	Parp6	PARP6	-1.87	4.84	7.27133e-07	6.3595e-06	3.91	5.78	4.05	3.77	5.77	5.79
ENSMUSG00000040407.18	Akap9	AKAP9	-1.87	6.27	1.04532e-06	7.7897e-06	5.33	7.2	5.48	5.18	7.18	7.22
ENSMUSG00000034799.16	Unc13a	UNC13A	-1.87	2.62	1.46884e-06	9.56685e-06	1.7	3.55	1.77	1.6	3.58	3.52
ENSMUSG00000039109.16	F13a1	F13A1	-1.87	2.16	6.75432e-06	2.7184e-05	1.24	3.09	1.09	1.36	3.16	3.01
ENSMUSG00000053559.13	Smagp	SMAGP	-1.87	0.24	0.00014368	0.000306121	-0.64	1.19	-0.95	-0.45	1.12	1.24
ENSMUSG00000102805.5	Gm37240	GM37240	-1.87	-0.39	0.00509034	0.00724375	-1.25	0.58	-0.98	-1.69	0.03	1.08
ENSMUSG00000038564.11	Ift172	IFT172	-1.86	4.49	5.9559e-07	5.7347e-06	3.56	5.42	3.69	3.44	5.43	5.42
ENSMUSG00000111497.1	Gm38431	GM38431	-1.86	3.81	6.81403e-07	6.1591e-06	2.88	4.74	2.99	2.76	4.74	4.74
ENSMUSG00000041143.16	Tmco4	TMCO4	-1.86	2.47	2.10376e-05	6.3706e-05	1.55	3.41	1.3	1.78	3.48	3.32
ENSMUSG00000027544.16	Nfatc2	NFATC2	-1.86	-0.93	0.000663922	0.00116048	-1.74	0.04	-1.97	-1.77	-0.22	0.24
ENSMUSG00000058239.13	Usf2	USF2	-1.85	5.94	3.41937e-08	1.96169e-06	5.01	6.86	5.01	5.01	6.86	6.86
ENSMUSG00000023088.17	Abcc1	ABCC1	-1.85	6.98	7.86292e-08	2.45224e-06	6.06	7.91	6.11	6.01	7.89	7.93
ENSMUSG00000026116.11	Tmem131	TMEM131	-1.85	5.05	2.83081e-07	3.98279e-06	4.13	5.98	4.23	4.02	5.96	6
ENSMUSG00000041560.12	Nop53	NOP53	-1.85	7.25	3.33925e-07	4.2421e-06	6.33	8.18	6.23	6.43	8.14	8.21
ENSMUSG00000037815.7	Ctnna1	CTNNA1	-1.85	7.97	4.18597e-07	4.71988e-06	7.04	8.9	6.94	7.15	8.9	8.9
ENSMUSG00000021097.15	Clmn	CLMN	-1.85	3.19	5.15069e-07	5.28271e-06	2.27	4.12	2.29	2.24	4.16	4.07
ENSMUSG00000005533.10	Igf1r	IGF1R	-1.85	6.2	8.05202e-07	6.6997e-06	5.28	7.12	5.42	5.14	7.13	7.12
ENSMUSG00000005198.15	Polr2a	POLR2A	-1.85	4.58	1.5669e-06	9.98725e-06	3.65	5.5	3.81	3.49	5.47	5.53
ENSMUSG00000023806.10	Rsph3b	RSPH3B	-1.85	4.22	2.57997e-06	1.39298e-05	3.29	5.15	3.11	3.48	5.16	5.13
ENSMUSG00000000282.12	Mnt	MNT	-1.85	4.19	5.9629e-06	2.47172e-05	3.27	5.12	3.49	3.05	5.13	5.1
ENSMUSG00000087408.10	Cers1	CERS1	-1.85	1.3	3.40627e-05	9.37694e-05	0.41	2.22	0.53	0.23	2.33	2.1
ENSMUSG00000004263.15	Atn1	ATN1	-1.85	2.61	4.50606e-05	0.00011753	1.7	3.54	2.01	1.37	3.55	3.52
ENSMUSG00000027996.13	Sfrp2	SFRP2	-1.85	0.58	0.000156427	0.000329259	-0.31	1.52	-0.6	-0.11	1.37	1.65
ENSMUSG00000021466.12	Ptch1	PTCH1	-1.84	5.43	4.9676e-08	2.14675e-06	4.52	6.35	4.53	4.49	6.37	6.33
ENSMUSG00000027999.15	Pla2g12a	PLA2G12A	-1.84	5.35	8.88072e-08	2.60011e-06	4.43	6.27	4.37	4.48	6.28	6.25
ENSMUSG00000041341.10	Atg2b	ATG2B	-1.84	6.22	1.23785e-07	2.96241e-06	5.3	7.14	5.37	5.23	7.14	7.14
ENSMUSG00000036615.6	Rfxap	RFXAP	-1.84	4.26	2.19239e-07	3.66292e-06	3.35	5.18	3.32	3.37	5.24	5.12
ENSMUSG00000041258.18	Zfp236	ZFP236	-1.84	5.18	2.85665e-07	3.99274e-06	4.26	6.1	4.36	4.15	6.08	6.12
ENSMUSG00000040669.14	Phc1	PHC1	-1.84	3.72	6.34272e-07	5.90092e-06	2.8	4.64	2.87	2.73	4.7	4.58
ENSMUSG00000028426.10	Rad23b	RAD23B	-1.84	8.73	1.12691e-06	8.11843e-06	7.81	9.65	7.67	7.95	9.65	9.65
ENSMUSG00000015647.9	Lama5	LAMA5	-1.84	8.26	5.90885e-06	2.45742e-05	7.34	9.18	7.54	7.13	9.17	9.2
ENSMUSG00000058135.12	Gstm1	GSTM1	-1.84	5.13	1.03068e-05	3.67467e-05	4.21	6.05	3.96	4.46	6.06	6.04
ENSMUSG00000058881.13	Zfp516	ZFP516	-1.83	6.7	4.90235e-08	2.14675e-06	5.79	7.62	5.8	5.77	7.59	7.64
ENSMUSG00000063049.4	Ing2	ING2	-1.83	5.01	5.43928e-08	2.23623e-06	4.1	5.93	4.07	4.12	5.93	5.93
ENSMUSG00000005534.10	Insr	INSR	-1.83	5.54	7.75978e-08	2.44456e-06	4.62	6.45	4.66	4.59	6.41	6.49
ENSMUSG00000005469.10	Prkaca	PRKACA	-1.83	5.84	8.99147e-08	2.61147e-06	4.93	6.76	4.87	4.98	6.79	6.73
ENSMUSG00000034245.10	Hdac11	HDAC11	-1.83	3.46	3.62937e-07	4.38877e-06	2.55	4.38	2.5	2.59	4.36	4.39
ENSMUSG00000020108.4	Ddit4	DDIT4	-1.83	9.59	6.63752e-07	6.06836e-06	8.67	10.5	8.56	8.78	10.5	10.5
ENSMUSG00000039450.11	Dcxr	DCXR	-1.83	3.83	1.55506e-06	9.94286e-06	2.92	4.74	2.76	3.06	4.72	4.77
ENSMUSG00000020986.13	Sec23a	SEC23A	-1.83	6.16	4.00519e-06	1.87416e-05	5.25	7.07	5.05	5.44	7.09	7.06
ENSMUSG00000004043.14	Stat5a	STAT5A	-1.83	2.23	7.67411e-06	2.97493e-05	1.32	3.15	1.14	1.48	3.17	3.11
ENSMUSG00000038872.10	Zfhx3	ZFHX3	-1.83	5.22	6.71482e-06	2.70748e-05	4.3	6.13	4.52	4.08	6.17	6.09
ENSMUSG00000042500.11	Ago4	AGO4	-1.83	1.13	2.14771e-05	6.47561e-05	0.24	2.05	0.11	0.32	2.11	1.97
ENSMUSG00000026457.14	Adipor1	ADIPOR1	-1.82	7.64	2.85791e-07	3.99274e-06	6.73	8.54	6.64	6.82	8.56	8.53
ENSMUSG00000030662.10	Ipo5	IPO5	-1.82	8.61	5.64583e-07	5.58537e-06	7.7	9.52	7.59	7.81	9.52	9.51
ENSMUSG00000042659.15	Arrdc4	ARRDC4	-1.82	3.59	8.95772e-07	7.17769e-06	2.69	4.5	2.77	2.59	4.56	4.44
ENSMUSG00000003546.10	Klc4	KLC4	-1.82	4.46	4.22907e-06	1.94542e-05	3.55	5.37	3.35	3.74	5.31	5.43
ENSMUSG00000079481.11	Nhsl2	NHSL2	-1.82	0.09	8.38687e-05	0.000195098	-0.76	1.02	-0.79	-0.84	0.93	1.08
ENSMUSG00000047146.17	Tet1	TET1	-1.82	0.31	0.000217116	0.000436525	-0.54	1.23	-0.29	-0.9	1.22	1.21
ENSMUSG00000041729.15	Coro2b	CORO2B	-1.82	-2.58	0.0059133	0.00831315	-3.12	-1.58	-3	-3.98	-1.67	-1.67
ENSMUSG00000039062.15	Anpep	ANPEP	-1.82	-2.5	0.00842102	0.0114927	-3.07	-1.5	-3.93	-2.92	-1.87	-1.29
ENSMUSG00000044308.17	Ubr3	UBR3	-1.81	6.4	4.12158e-08	2.0965e-06	5.5	7.3	5.48	5.51	7.31	7.3
ENSMUSG00000049354.8	Dcaf7	DCAF7	-1.81	6.32	4.90675e-08	2.14675e-06	5.42	7.23	5.39	5.44	7.21	7.25
ENSMUSG00000036606.17	Plxnb2	PLXNB2	-1.81	7.76	6.38364e-08	2.31838e-06	6.85	8.66	6.83	6.87	8.64	8.68
ENSMUSG00000035890.9	Rnf126	RNF126	-1.81	6.24	9.37864e-08	2.64794e-06	5.34	7.14	5.37	5.3	7.1	7.19
ENSMUSG00000030189.15	Ybx3	YBX3	-1.81	8.38	1.13403e-07	2.86811e-06	7.47	9.29	7.43	7.52	9.3	9.27
ENSMUSG00000031490.6	Eif4ebp1	EIF4EBP1	-1.81	7.63	1.4059e-07	3.0613e-06	6.72	8.53	6.66	6.78	8.51	8.55
ENSMUSG00000084883.2	Ccdc85c	CCDC85C	-1.81	5.15	1.8017e-07	3.34861e-06	4.25	6.06	4.17	4.31	6.1	6.02
ENSMUSG00000039844.19	Rapgef1	RAPGEF1	-1.81	6.25	2.35266e-07	3.71408e-06	5.35	7.16	5.44	5.26	7.17	7.15
ENSMUSG00000019055.15	Plod1	PLOD1	-1.81	4.53	3.14685e-07	4.11718e-06	3.63	5.44	3.55	3.71	5.4	5.48
ENSMUSG00000007564.15	Ppp2r1a	PPP2R1A	-1.81	7.53	5.58104e-07	5.57394e-06	6.62	8.43	6.51	6.74	8.43	8.43
ENSMUSG00000071379.2	Hpcal1	HPCAL1	-1.81	4.7	1.70695e-06	1.05646e-05	3.8	5.61	3.63	3.96	5.61	5.6
ENSMUSG00000037526.7	Atg14	ATG14	-1.81	4.4	2.08087e-06	1.21037e-05	3.5	5.3	3.32	3.66	5.29	5.31
ENSMUSG00000056211.13	R3hdm1	R3HDM1	-1.81	5.41	2.14278e-06	1.23047e-05	4.51	6.31	4.68	4.34	6.35	6.28
ENSMUSG00000009739.17	Pou6f1	POU6F1	-1.81	1.95	5.27553e-06	2.26571e-05	1.06	2.86	1.15	0.94	2.85	2.87
ENSMUSG00000064225.6	Paqr9	PAQR9	-1.81	1.05	4.5699e-05	0.000119022	0.17	1.97	0.09	0.18	1.8	2.11
ENSMUSG00000028931.12	Kcnab2	KCNAB2	-1.81	-0.68	0.000242116	0.000479575	-1.48	0.26	-1.61	-1.56	0.19	0.26
ENSMUSG00000010095.13	Slc3a2	SLC3A2	-1.8	7.53	9.52522e-08	2.66631e-06	6.63	8.43	6.58	6.68	8.42	8.43
ENSMUSG00000034243.17	Golgb1	GOLGB1	-1.8	5.77	1.6208e-07	3.23801e-06	4.87	6.66	4.95	4.79	6.65	6.68
ENSMUSG00000039145.16	Camk1d	CAMK1D	-1.8	3.41	3.05072e-07	4.10046e-06	2.51	4.31	2.51	2.5	4.31	4.3
ENSMUSG00000045795.10	Whamm	WHAMM	-1.8	3.83	3.46533e-07	4.32027e-06	2.94	4.73	2.89	2.96	4.79	4.68
ENSMUSG00000036391.16	Sec24a	SEC24A	-1.8	3.96	5.81277e-07	5.66137e-06	3.07	4.87	3.16	2.97	4.91	4.82
ENSMUSG00000058690.14	Ccser2	CCSER2	-1.8	5.48	5.87458e-07	5.70437e-06	4.58	6.38	4.46	4.7	6.38	6.37
ENSMUSG00000028278.14	Rragd	RRAGD	-1.8	5.08	6.44613e-07	5.95131e-06	4.18	5.99	4.06	4.31	5.98	5.99
ENSMUSG00000026553.17	Copa	COPA	-1.8	7.77	1.43334e-06	9.45329e-06	6.88	8.68	6.73	7.02	8.67	8.68
ENSMUSG00000049811.16	Fam161a	FAM161A	-1.8	0.24	6.39193e-05	0.000155938	-0.6	1.15	-0.6	-0.73	1.16	1.12
ENSMUSG00000117406.1	Ntn3	NTN3	-1.8	0	0.00012657	0.000274603	-0.83	0.92	-0.82	-0.96	1.01	0.8
ENSMUSG00000039115.13	Itga9	ITGA9	-1.8	-1.88	0.00137878	0.00222775	-2.55	-0.93	-2.64	-2.92	-0.9	-1.07
ENSMUSG00000023781.2	Hes7	HES7	-1.8	-2.15	0.00279782	0.00420476	-2.78	-1.19	-2.75	-3.35	-1.14	-1.38
ENSMUSG00000112743.1	Gm49358	GM49358	-1.8	-0.83	0.00764782	0.010514	-1.6	0.08	-1.52	-1.91	0.65	-0.56
ENSMUSG00000035781.14	R3hdm4	R3HDM4	-1.79	5.1	6.49706e-08	2.33894e-06	4.21	6	4.17	4.23	6	6
ENSMUSG00000032497.18	Lrrfip2	LRRFIP2	-1.79	5.57	7.73064e-08	2.44456e-06	4.67	6.46	4.63	4.72	6.45	6.47
ENSMUSG00000039976.4	Tbc1d16	TBC1D16	-1.79	4.36	1.29401e-07	2.96241e-06	3.46	5.25	3.45	3.47	5.29	5.22
ENSMUSG00000020538.15	Srebf1	SREBF1	-1.79	6.69	1.31411e-07	2.96241e-06	5.79	7.58	5.73	5.85	7.56	7.61
ENSMUSG00000022812.14	Gsk3b	GSK3B	-1.79	5.84	1.4039e-07	3.0613e-06	4.95	6.73	5.01	4.88	6.76	6.71
ENSMUSG00000040549.16	Ckap5	CKAP5	-1.79	7.39	2.15603e-07	3.65071e-06	6.5	8.29	6.42	6.58	8.3	8.28
ENSMUSG00000026469.14	Xpr1	XPR1	-1.79	4.72	3.12043e-07	4.11718e-06	3.83	5.62	3.74	3.92	5.64	5.59
ENSMUSG00000031434.15	Morc4	MORC4	-1.79	4.45	3.5055e-07	4.33922e-06	3.55	5.35	3.46	3.64	5.36	5.33
ENSMUSG00000038369.14	Ncoa6	NCOA6	-1.79	3.71	4.65934e-06	2.07957e-05	2.83	4.61	3.01	2.63	4.62	4.59
ENSMUSG00000059040.5	Eno1b	ENO1B	-1.79	7.93	5.14473e-06	2.22588e-05	7.04	8.82	6.84	7.23	8.82	8.83
ENSMUSG00000040270.16	Bach2	BACH2	-1.79	1.52	6.84485e-05	0.00016497	0.64	2.42	0.87	0.37	2.3	2.52
ENSMUSG00000010064.15	Slc38a3	SLC38A3	-1.79	0.29	0.000118895	0.000261017	-0.54	1.19	-0.55	-0.65	1.33	1.03
ENSMUSG00000019194.15	Scn1b	SCN1B	-1.79	0.18	0.000249676	0.000492608	-0.66	1.08	-0.98	-0.45	1.16	0.98
ENSMUSG00000054256.11	Msi1	MSI1	-1.79	-2.22	0.00240135	0.00367039	-2.83	-1.25	-2.87	-3.35	-1.27	-1.38
ENSMUSG00000006941.5	Eif1b	EIF1B	-1.78	5.93	4.4561e-08	2.13688e-06	5.04	6.82	5.05	5.03	6.81	6.83
ENSMUSG00000052533.14	Nup188	NUP188	-1.78	6.04	4.52535e-08	2.14238e-06	5.15	6.93	5.16	5.14	6.94	6.91
ENSMUSG00000063760.9	Rnf217	RNF217	-1.78	5.53	4.79326e-08	2.14675e-06	4.64	6.42	4.66	4.63	6.42	6.43
ENSMUSG00000023118.15	Sympk	SYMPK	-1.78	7.28	6.87052e-08	2.39462e-06	6.39	8.16	6.42	6.36	8.15	8.18
ENSMUSG00000040856.17	Dlk1	DLK1	-1.78	7.26	2.21817e-07	3.67245e-06	6.37	8.14	6.29	6.44	8.11	8.18
ENSMUSG00000049940.7	Pgrmc2	PGRMC2	-1.78	6.11	4.52245e-07	4.95304e-06	5.22	7	5.11	5.33	7.02	6.98
ENSMUSG00000002222.14	Rmnd5a	RMND5A	-1.78	6.33	1.113e-06	8.05514e-06	5.43	7.21	5.29	5.57	7.19	7.24
ENSMUSG00000030761.16	Myo7a	MYO7A	-1.78	6.11	4.63601e-06	2.0721e-05	5.22	7.01	5.42	5.03	6.98	7.03
ENSMUSG00000023456.15	Tpi1	TPI1	-1.78	10.45	1.3703e-05	4.5462e-05	9.56	11.34	9.34	9.79	11.33	11.35
ENSMUSG00000031189.12	Aff2	AFF2	-1.78	-2.14	0.00199277	0.0030956	-2.76	-1.19	-3.14	-2.92	-1.14	-1.38
ENSMUSG00000040703.11	Cyp2s1	CYP2S1	-1.78	-1.97	0.00799021	0.0109535	-2.61	-1.02	-3.3	-2.4	-0.7	-1.47
ENSMUSG00000030030.5	1700003E16Rik	1700003E16RIK	-1.78	-1.2	0.010699	0.0143276	-1.94	-0.26	-2.87	-1.33	-0.52	-0.08
ENSMUSG00000024383.9	Map3k2	MAP3K2	-1.77	5.89	4.79886e-08	2.14675e-06	5	6.78	5.02	4.99	6.77	6.78
ENSMUSG00000058056.16	Palld	PALLD	-1.77	4.63	1.31225e-07	2.96241e-06	3.75	5.51	3.79	3.69	5.52	5.51
ENSMUSG00000020190.13	Mknk2	MKNK2	-1.77	6.37	1.55793e-07	3.19294e-06	5.48	7.25	5.41	5.55	7.26	7.24
ENSMUSG00000036206.12	Sh3bp4	SH3BP4	-1.77	4.49	1.86692e-07	3.41897e-06	3.61	5.38	3.55	3.67	5.35	5.4
ENSMUSG00000037622.14	Wdtc1	WDTC1	-1.77	4.51	2.12706e-07	3.6212e-06	3.62	5.39	3.69	3.56	5.41	5.37
ENSMUSG00000030987.5	Stim1	STIM1	-1.77	3.87	2.45725e-07	3.75613e-06	2.99	4.76	3.01	2.94	4.78	4.73
ENSMUSG00000016528.10	Mapkapk2	MAPKAPK2	-1.77	7.16	2.44183e-07	3.74592e-06	6.28	8.04	6.19	6.36	8.04	8.03
ENSMUSG00000025986.6	Slc39a10	SLC39A10	-1.77	6.72	4.47695e-07	4.92112e-06	5.84	7.6	5.73	5.94	7.59	7.61
ENSMUSG00000031438.11	Rnf128	RNF128	-1.77	6.36	1.90893e-06	1.13721e-05	5.47	7.25	5.32	5.63	7.28	7.21
ENSMUSG00000024083.16	Pja2	PJA2	-1.77	5.85	2.46193e-06	1.35191e-05	4.97	6.74	4.8	5.14	6.71	6.77
ENSMUSG00000021686.6	Ap3b1	AP3B1	-1.77	6.37	2.54304e-06	1.37957e-05	5.48	7.25	5.31	5.65	7.25	7.26
ENSMUSG00000063524.13	Eno1	ENO1	-1.77	11.65	7.57977e-06	2.94836e-05	10.76	12.54	10.57	10.95	12.52	12.55
ENSMUSG00000026639.18	Lamb3	LAMB3	-1.77	1.83	7.75714e-05	0.000182785	0.96	2.72	0.64	1.25	2.7	2.72
ENSMUSG00000057766.14	Ankrd29	ANKRD29	-1.77	0.08	0.000961933	0.00161423	-0.75	0.99	-1.09	-0.55	0.68	1.27
ENSMUSG00000030201.15	Lrp6	LRP6	-1.76	6.17	1.41388e-07	3.06648e-06	5.29	7.05	5.36	5.22	7.05	7.05
ENSMUSG00000025477.14	Inpp5a	INPP5A	-1.76	4.57	1.55017e-07	3.19294e-06	3.7	5.46	3.64	3.74	5.43	5.48
ENSMUSG00000034135.15	Sik3	SIK3	-1.76	5.33	2.88136e-07	3.99274e-06	4.45	6.21	4.36	4.54	6.22	6.2
ENSMUSG00000036323.14	Srp72	SRP72	-1.76	8	4.62962e-07	5.01003e-06	7.12	8.89	7.02	7.22	8.88	8.89
ENSMUSG00000006418.17	Rnf114	RNF114	-1.76	6.43	8.54366e-07	6.96125e-06	5.55	7.31	5.42	5.68	7.29	7.33
ENSMUSG00000027864.9	Ptgfrn	PTGFRN	-1.76	7.29	1.65387e-06	1.03688e-05	6.41	8.18	6.26	6.56	8.18	8.17
ENSMUSG00000046447.3	Camk2n1	CAMK2N1	-1.76	2.02	5.38247e-06	2.2955e-05	1.15	2.9	1.14	1.13	2.98	2.82
ENSMUSG00000020679.11	Hnf1b	HNF1B	-1.76	2.53	1.05655e-05	3.74176e-05	1.66	3.41	1.84	1.46	3.45	3.36
ENSMUSG00000026223.15	Itm2c	ITM2C	-1.76	6.7	7.33518e-06	2.87818e-05	5.82	7.58	5.61	6.03	7.59	7.58
ENSMUSG00000024873.7	Cnih2	CNIH2	-1.76	-2.02	0.00159249	0.00253426	-2.66	-1.08	-3	-2.8	-1.14	-1.14
ENSMUSG00000039004.6	Bmp6	BMP6	-1.76	-2.38	0.00496282	0.00707751	-2.96	-1.41	-3	-3.53	-1.77	-1.21
ENSMUSG00000000826.16	Dnajc5	DNAJC5	-1.75	6.78	5.62788e-08	2.25187e-06	5.92	7.66	5.93	5.89	7.66	7.65
ENSMUSG00000020576.10	Nbas	NBAS	-1.75	4.74	1.55806e-07	3.19294e-06	3.87	5.61	3.92	3.8	5.6	5.62
ENSMUSG00000039148.5	Sart1	SART1	-1.75	5.72	2.6634e-07	3.86794e-06	4.84	6.6	4.93	4.75	6.58	6.61
ENSMUSG00000026219.14	Trip12	TRIP12	-1.75	8.01	3.0751e-07	4.11017e-06	7.13	8.89	7.05	7.22	8.89	8.88
ENSMUSG00000025066.10	Sfr1	SFR1	-1.75	6.92	3.47082e-07	4.32027e-06	6.04	7.8	5.95	6.14	7.81	7.78
ENSMUSG00000035232.8	Pdk3	PDK3	-1.75	5.83	3.87468e-07	4.52498e-06	4.95	6.7	4.85	5.05	6.7	6.71
ENSMUSG00000024521.8	Pmaip1	PMAIP1	-1.75	4.57	4.16812e-07	4.71362e-06	3.7	5.45	3.62	3.77	5.5	5.39
ENSMUSG00000034908.16	Sidt2	SIDT2	-1.75	5.87	4.20331e-07	4.72109e-06	5	6.75	5.1	4.89	6.76	6.74
ENSMUSG00000021112.9	Mpp5	MPP5	-1.75	6.09	6.65755e-07	6.07447e-06	5.21	6.96	5.09	5.33	6.99	6.94
ENSMUSG00000013160.7	Atp6v0d1	ATP6V0D1	-1.75	6.34	1.03754e-06	7.7686e-06	5.46	7.22	5.33	5.6	7.21	7.23
ENSMUSG00000021250.13	Fos	FOS	-1.75	2.19	3.60167e-06	1.74044e-05	1.33	3.06	1.31	1.32	3.13	3
ENSMUSG00000020901.13	Pik3r5	PIK3R5	-1.75	1.86	6.02578e-06	2.49203e-05	1	2.74	1.06	0.9	2.72	2.76
ENSMUSG00000021577.14	Sdha	SDHA	-1.75	7.44	5.23709e-06	2.25261e-05	6.57	8.32	6.37	6.76	8.32	8.31
ENSMUSG00000042444.10	Mindy2	MINDY2	-1.75	4.67	6.54674e-06	2.65419e-05	3.8	5.54	3.58	4.01	5.54	5.54
ENSMUSG00000035783.9	Acta2	ACTA2	-1.75	-0.04	0.000142271	0.000303788	-0.85	0.84	-1.02	-0.81	0.89	0.78
ENSMUSG00000024529.14	Lox	LOX	-1.75	-1.67	0.00243895	0.00372015	-2.35	-0.76	-2.18	-2.92	-0.85	-0.75
ENSMUSG00000040363.15	Bcor	BCOR	-1.74	4.88	7.74911e-08	2.44456e-06	4.01	5.75	4.02	4	5.74	5.76
ENSMUSG00000116165.1	Pdxp	PDXP	-1.74	5.51	1.42359e-07	3.07848e-06	4.64	6.38	4.68	4.59	6.33	6.42
ENSMUSG00000032127.9	Vps11	VPS11	-1.74	6.04	1.61042e-07	3.23605e-06	5.18	6.92	5.11	5.24	6.93	6.9
ENSMUSG00000029050.15	Ski	SKI	-1.74	5.55	4.80983e-07	5.10403e-06	4.68	6.42	4.78	4.57	6.44	6.39
ENSMUSG00000066043.13	Phactr4	PHACTR4	-1.74	3.66	7.02374e-07	6.21453e-06	2.8	4.53	2.87	2.72	4.49	4.57
ENSMUSG00000006920.14	Ezh1	EZH1	-1.74	4.41	6.90658e-07	6.1833e-06	3.54	5.28	3.64	3.45	5.33	5.22
ENSMUSG00000032839.13	Trpc1	TRPC1	-1.74	2.83	1.40257e-06	9.33364e-06	1.97	3.7	1.89	2.03	3.68	3.72
ENSMUSG00000051159.16	Cited1	CITED1	-1.74	-1.53	0.00252866	0.00383975	-2.21	-0.62	-2.64	-2.15	-0.4	-0.93
ENSMUSG00000025812.17	Pard3	PARD3	-1.73	5.71	6.00274e-08	2.26838e-06	4.85	6.57	4.83	4.85	6.55	6.59
ENSMUSG00000026074.15	Map4k4	MAP4K4	-1.73	7.91	9.11149e-08	2.62668e-06	7.04	8.77	7.01	7.07	8.78	8.77
ENSMUSG00000022680.14	Pdxdc1	PDXDC1	-1.73	6.29	9.721e-08	2.69613e-06	5.42	7.16	5.37	5.47	7.16	7.15
ENSMUSG00000035247.16	Hectd1	HECTD1	-1.73	7.26	1.27117e-07	2.96241e-06	6.39	8.12	6.45	6.34	8.12	8.13
ENSMUSG00000034663.13	Bmp2k	BMP2K	-1.73	5.1	1.30539e-07	2.96241e-06	4.23	5.96	4.29	4.18	5.95	5.97
ENSMUSG00000021375.11	Kif13a	KIF13A	-1.73	4.71	2.21008e-07	3.67191e-06	3.85	5.58	3.92	3.78	5.59	5.57
ENSMUSG00000071757.10	Zhx2	ZHX2	-1.73	3.55	3.83584e-07	4.50828e-06	2.69	4.42	2.71	2.67	4.39	4.45
ENSMUSG00000009470.17	Tnpo1	TNPO1	-1.73	8.55	3.6761e-07	4.40712e-06	7.68	9.41	7.6	7.77	9.42	9.41
ENSMUSG00000024091.9	Vapa	VAPA	-1.73	7.93	4.67629e-07	5.03452e-06	7.06	8.8	6.97	7.16	8.83	8.76
ENSMUSG00000022508.5	Bcl6	BCL6	-1.73	3.52	5.38293e-07	5.44972e-06	2.66	4.39	2.68	2.64	4.34	4.44
ENSMUSG00000052727.6	Map1b	MAP1B	-1.73	5.34	6.14651e-07	5.82388e-06	4.48	6.21	4.6	4.36	6.2	6.22
ENSMUSG00000031309.15	Rps6ka3	RPS6KA3	-1.73	4.12	1.02451e-06	7.71586e-06	3.25	4.98	3.13	3.37	4.97	4.99
ENSMUSG00000038894.7	Irs2	IRS2	-1.73	4.84	1.02557e-06	7.71586e-06	3.99	5.71	4.11	3.85	5.7	5.71
ENSMUSG00000037370.13	Enpp1	ENPP1	-1.73	3.46	4.66489e-06	2.08057e-05	2.59	4.32	2.42	2.77	4.31	4.33
ENSMUSG00000075600.3	Zc3h3	ZC3H3	-1.73	2.91	6.96841e-06	2.77588e-05	2.06	3.77	2.23	1.87	3.77	3.78
ENSMUSG00000032024.10	Clmp	CLMP	-1.73	0.86	4.66889e-05	0.000121003	0.03	1.73	-0.15	0.14	1.75	1.7
ENSMUSG00000033863.2	Klf9	KLF9	-1.72	5.6	9.91403e-08	2.7229e-06	4.75	6.46	4.7	4.78	6.48	6.44
ENSMUSG00000022558.16	Mroh1	MROH1	-1.72	6.17	1.04937e-07	2.78026e-06	5.31	7.03	5.37	5.26	7.03	7.03
ENSMUSG00000033228.8	Scaf11	SCAF11	-1.72	7.6	1.17057e-07	2.87247e-06	6.75	8.46	6.7	6.79	8.46	8.46
ENSMUSG00000025417.8	Pip4k2c	PIP4K2C	-1.72	5.04	1.24488e-07	2.96241e-06	4.19	5.91	4.13	4.23	5.93	5.89
ENSMUSG00000020747.17	Tmem94	TMEM94	-1.72	4.96	1.74308e-07	3.30226e-06	4.11	5.82	4.16	4.04	5.84	5.8
ENSMUSG00000031488.14	Rab11fip1	RAB11FIP1	-1.72	3.97	2.74422e-07	3.91943e-06	3.11	4.83	3.13	3.08	4.79	4.87
ENSMUSG00000026670.15	Uap1	UAP1	-1.72	6.03	2.74523e-07	3.91943e-06	5.17	6.88	5.07	5.25	6.88	6.89
ENSMUSG00000045252.11	Zfp574	ZFP574	-1.72	4.15	5.7735e-07	5.64061e-06	3.29	5	3.38	3.2	4.97	5.04
ENSMUSG00000025027.18	Xpnpep1	XPNPEP1	-1.72	6.51	5.61685e-07	5.5765e-06	5.65	7.38	5.54	5.76	7.36	7.39
ENSMUSG00000022253.15	Nadk2	NADK2	-1.72	5.97	8.91801e-07	7.16865e-06	5.11	6.83	4.98	5.23	6.86	6.79
ENSMUSG00000013236.17	Ptprs	PTPRS	-1.72	7.89	2.61609e-06	1.40765e-05	7.04	8.75	7.19	6.88	8.74	8.77
ENSMUSG00000051149.15	Adnp	ADNP	-1.72	3.38	1.57585e-05	5.07277e-05	2.53	4.23	2.59	2.46	4.42	4.04
ENSMUSG00000016239.11	Lonrf3	LONRF3	-1.72	0.69	4.56244e-05	0.000118852	-0.13	1.57	-0.13	-0.2	1.49	1.63
ENSMUSG00000021259.5	Cyp46a1	CYP46A1	-1.72	-0.35	0.000333687	0.000631106	-1.13	0.52	-1.16	-1.25	0.67	0.35
ENSMUSG00000050556.9	Kcnb1	KCNB1	-1.72	-0.97	0.00121345	0.00198643	-1.7	-0.08	-1.51	-2.15	-0.15	-0.08
ENSMUSG00000094248.1	Hist1h2ao	HIST1H2AO	-1.72	-0.39	0.0366922	0.0452165	-1.17	0.52	-0.45	-2.07	-0.23	1.21
ENSMUSG00000003352.14	Cacnb3	CACNB3	-1.71	5.77	6.40253e-08	2.31838e-06	4.91	6.62	4.9	4.92	6.65	6.6
ENSMUSG00000047777.9	Phf13	PHF13	-1.71	5.33	7.33311e-08	2.418e-06	4.48	6.19	4.5	4.46	6.2	6.17
ENSMUSG00000027994.14	Mcub	MCUB	-1.71	5.04	7.6022e-08	2.44281e-06	4.19	5.89	4.19	4.17	5.89	5.89
ENSMUSG00000044791.16	Setd2	SETD2	-1.71	6.41	7.5126e-08	2.42643e-06	5.55	7.26	5.58	5.52	7.25	7.27
ENSMUSG00000038252.13	Ncapd2	NCAPD2	-1.71	7.35	1.05402e-07	2.78168e-06	6.5	8.2	6.45	6.54	8.2	8.2
ENSMUSG00000018567.14	Gabarap	GABARAP	-1.71	8.29	1.25296e-07	2.96241e-06	7.44	9.14	7.4	7.47	9.13	9.15
ENSMUSG00000034297.14	Med13	MED13	-1.71	5.99	2.53276e-07	3.80131e-06	5.14	6.85	5.22	5.06	6.86	6.83
ENSMUSG00000022159.16	Rab2b	RAB2B	-1.71	3.28	7.63726e-07	6.51865e-06	2.44	4.14	2.41	2.45	4.19	4.09
ENSMUSG00000028098.13	Rnf115	RNF115	-1.71	5.74	1.25168e-06	8.68893e-06	4.88	6.59	4.74	5.02	6.62	6.56
ENSMUSG00000037692.14	Ahdc1	AHDC1	-1.71	4.81	1.61053e-06	1.01854e-05	3.96	5.66	4.1	3.81	5.68	5.64
ENSMUSG00000024308.15	Tapbp	TAPBP	-1.71	5.91	1.12709e-05	3.92266e-05	5.05	6.76	4.83	5.27	6.72	6.8
ENSMUSG00000066415.4	Msl2	MSL2	-1.7	5.58	7.11169e-08	2.40527e-06	4.73	6.43	4.75	4.71	6.45	6.41
ENSMUSG00000021690.10	Jmy	JMY	-1.7	5.29	8.89881e-08	2.60011e-06	4.45	6.14	4.43	4.47	6.17	6.12
ENSMUSG00000019854.17	Reps1	REPS1	-1.7	5.13	9.11519e-08	2.62668e-06	4.28	5.97	4.24	4.31	5.98	5.97
ENSMUSG00000026872.18	Zeb2	ZEB2	-1.7	4.59	1.89584e-07	3.43095e-06	3.74	5.44	3.78	3.7	5.47	5.41
ENSMUSG00000018882.12	Mrpl45	MRPL45	-1.7	7.21	2.27649e-07	3.70218e-06	6.36	8.06	6.28	6.43	8.04	8.08
ENSMUSG00000034612.7	Chst11	CHST11	-1.7	4.83	2.66361e-07	3.86794e-06	3.98	5.68	3.91	4.06	5.68	5.68
ENSMUSG00000037523.13	Mavs	MAVS	-1.7	4.25	4.77182e-07	5.08941e-06	3.4	5.1	3.32	3.47	5.06	5.14
ENSMUSG00000038244.14	Mical2	MICAL2	-1.7	7.33	4.61733e-07	5.00969e-06	6.48	8.18	6.58	6.39	8.19	8.18
ENSMUSG00000031532.6	Saraf	SARAF	-1.7	7.09	4.70309e-07	5.05471e-06	6.24	7.95	6.14	6.34	7.93	7.96
ENSMUSG00000038264.8	Sema7a	SEMA7A	-1.7	1.03	5.70955e-05	0.000142105	0.21	1.88	-0.01	0.36	1.86	1.89
ENSMUSG00000006585.3	Cdt1	CDT1	-1.69	6.23	1.56038e-07	3.19294e-06	5.38	7.07	5.32	5.44	7.06	7.08
ENSMUSG00000049823.9	Zbtb12	ZBTB12	-1.69	4.5	2.5646e-07	3.81738e-06	3.65	5.34	3.6	3.7	5.31	5.38
ENSMUSG00000030704.14	Rab6a	RAB6A	-1.69	7.04	2.52372e-07	3.80131e-06	6.2	7.88	6.12	6.27	7.91	7.86
ENSMUSG00000052942.13	Glis3	GLIS3	-1.69	4.49	2.78839e-07	3.95411e-06	3.64	5.33	3.69	3.59	5.29	5.37
ENSMUSG00000020900.15	Myh10	MYH10	-1.69	7.36	3.98465e-07	4.59295e-06	6.52	8.21	6.61	6.43	8.2	8.22
ENSMUSG00000016552.13	Foxred2	FOXRED2	-1.69	2.97	9.70869e-07	7.5055e-06	2.13	3.82	2.08	2.16	3.8	3.82
ENSMUSG00000007216.6	Zfp775	ZFP775	-1.69	2.92	1.3552e-06	9.13482e-06	2.08	3.77	2.01	2.13	3.74	3.79
ENSMUSG00000025647.16	Shisa5	SHISA5	-1.69	5.64	1.64069e-06	1.0312e-05	4.79	6.49	4.65	4.93	6.53	6.44
ENSMUSG00000061232.16	H2-K1	H2-K1	-1.69	5.09	2.5794e-06	1.39298e-05	4.25	5.93	4.08	4.4	5.89	5.97
ENSMUSG00000040502.5	2021-03-09	44264	-1.69	3.24	7.16372e-06	2.8348e-05	2.4	4.09	2.24	2.55	4.18	4
ENSMUSG00000004267.16	Eno2	ENO2	-1.69	4.17	1.0164e-05	3.63197e-05	3.33	5.01	3.54	3.11	5.04	4.98
ENSMUSG00000020823.16	Sec14l1	SEC14L1	-1.68	5.01	9.51557e-08	2.66631e-06	4.17	5.86	4.18	4.16	5.83	5.88
ENSMUSG00000024077.15	Strn	STRN	-1.68	5.03	1.24814e-07	2.96241e-06	4.2	5.88	4.17	4.21	5.91	5.84
ENSMUSG00000029816.10	Gpnmb	GPNMB	-1.68	5.39	1.57392e-07	3.21018e-06	4.56	6.24	4.49	4.62	6.24	6.23
ENSMUSG00000018398.18	2021-09-08	44447	-1.68	4.62	3.06373e-07	4.10371e-06	3.79	5.46	3.73	3.83	5.51	5.41
ENSMUSG00000024359.10	Hspa9	HSPA9	-1.68	9.88	4.8758e-06	2.1412e-05	9.05	10.73	8.88	9.21	10.72	10.73
ENSMUSG00000061393.14	Acvr2b	ACVR2B	-1.68	2.92	6.29226e-06	2.57931e-05	2.08	3.76	2.19	1.96	3.66	3.85
ENSMUSG00000032289.15	Thsd4	THSD4	-1.68	2.22	7.40956e-06	2.89921e-05	1.39	3.07	1.47	1.28	2.99	3.13
ENSMUSG00000033763.14	Mtss1l	MTSS1L	-1.68	2.23	3.61299e-05	9.85128e-05	1.4	3.07	1.63	1.15	3.06	3.08
ENSMUSG00000106892.1	Gm42791	GM42791	-1.68	-0.95	0.00236957	0.00362489	-1.67	-0.08	-1.36	-2.22	-0.19	-0.03
ENSMUSG00000022099.17	Dmtn	DMTN	-1.68	-1.82	0.00816675	0.0111778	-2.44	-0.94	-2.26	-3.05	-0.61	-1.38
ENSMUSG00000041552.7	Ptchd1	PTCHD1	-1.68	-2.05	0.00949061	0.0128312	-2.64	-1.14	-3.48	-2.31	-1.34	-1.07
ENSMUSG00000033581.17	Igf2bp2	IGF2BP2	-1.67	6.57	7.03135e-08	2.40527e-06	5.73	7.4	5.73	5.73	7.39	7.42
ENSMUSG00000024968.14	Rcor2	RCOR2	-1.67	6.08	7.12145e-08	2.40527e-06	5.25	6.92	5.26	5.23	6.9	6.94
ENSMUSG00000021823.10	Vcl	VCL	-1.67	7.03	7.24524e-08	2.41255e-06	6.2	7.87	6.19	6.2	7.87	7.87
ENSMUSG00000008730.17	Hipk1	HIPK1	-1.67	5.94	9.94756e-08	2.7229e-06	5.11	6.78	5.11	5.09	6.82	6.74
ENSMUSG00000020038.10	Cry1	CRY1	-1.67	4.15	2.37781e-07	3.71789e-06	3.31	4.98	3.27	3.35	4.99	4.97
ENSMUSG00000038718.15	Pbx3	PBX3	-1.67	3.89	3.53783e-07	4.35351e-06	3.06	4.73	3.07	3.04	4.77	4.69
ENSMUSG00000041229.15	Phf8	PHF8	-1.67	3.98	4.50914e-07	4.94353e-06	3.15	4.82	3.08	3.21	4.82	4.82
ENSMUSG00000032120.11	C2cd2l	C2CD2L	-1.67	4.03	7.74374e-07	6.58751e-06	3.2	4.87	3.27	3.13	4.81	4.93
ENSMUSG00000046186.8	Cd109	CD109	-1.67	7.18	4.76685e-06	2.11031e-05	6.35	8.02	6.17	6.52	8	8.03
ENSMUSG00000033209.17	Ttc28	TTC28	-1.67	3.4	8.18654e-06	3.10461e-05	2.57	4.23	2.74	2.38	4.17	4.29
ENSMUSG00000018604.18	Tbx3	TBX3	-1.67	4.46	8.86494e-06	3.29854e-05	3.62	5.29	3.83	3.41	5.33	5.25
ENSMUSG00000020536.12	Llgl1	LLGL1	-1.66	6.57	1.05608e-07	2.78168e-06	5.74	7.4	5.72	5.77	7.37	7.43
ENSMUSG00000040007.8	Bahd1	BAHD1	-1.66	4.62	2.33427e-07	3.71408e-06	3.8	5.46	3.82	3.77	5.5	5.41
ENSMUSG00000075415.13	Fnbp1	FNBP1	-1.66	4.16	4.18869e-07	4.71988e-06	3.34	4.99	3.38	3.29	5.03	4.94
ENSMUSG00000054452.10	Aes	AES	-1.66	7.45	1.95145e-06	1.15271e-05	6.62	8.29	6.48	6.76	8.3	8.27
ENSMUSG00000019539.11	Rcn3	RCN3	-1.66	2.4	3.27283e-06	1.63303e-05	1.58	3.23	1.63	1.49	3.22	3.23
ENSMUSG00000024867.14	Pip5k1b	PIP5K1B	-1.66	3.75	2.86484e-06	1.49974e-05	2.92	4.58	2.78	3.05	4.52	4.64
ENSMUSG00000000791.9	Il12rb1	IL12RB1	-1.66	1.27	2.00301e-05	6.13501e-05	0.46	2.1	0.51	0.37	2.08	2.13
ENSMUSG00000022708.16	Zbtb20	ZBTB20	-1.66	3.88	3.72407e-05	0.000100953	3.06	4.71	3.33	2.78	4.74	4.68
ENSMUSG00000039908.14	Slc26a11	SLC26A11	-1.66	0.12	0.000184048	0.000379202	-0.66	0.97	-0.85	-0.57	0.89	1.03
ENSMUSG00000025422.9	Agap2	AGAP2	-1.66	-1.78	0.00180824	0.00283934	-2.41	-0.9	-2.53	-2.69	-0.85	-1.07
ENSMUSG00000052415.5	Tchh	TCHH	-1.66	-2	0.0020795	0.0032172	-2.6	-1.11	-2.75	-2.92	-1.2	-1.14
ENSMUSG00000033713.12	Foxn3	FOXN3	-1.65	6.06	7.29681e-08	2.41255e-06	5.23	6.88	5.22	5.25	6.9	6.87
ENSMUSG00000056851.14	Pcbp2	PCBP2	-1.65	6.73	8.21787e-08	2.51291e-06	5.91	7.56	5.9	5.92	7.58	7.54
ENSMUSG00000061079.14	Zfp143	ZFP143	-1.65	4.7	1.21969e-07	2.94131e-06	3.88	5.53	3.88	3.88	5.52	5.54
ENSMUSG00000003068.16	Stk11	STK11	-1.65	5.98	1.22881e-07	2.95763e-06	5.15	6.8	5.2	5.1	6.81	6.8
ENSMUSG00000025195.9	Dnmbp	DNMBP	-1.65	4.64	1.53029e-07	3.17794e-06	3.82	5.46	3.82	3.81	5.43	5.49
ENSMUSG00000054808.15	Actn4	ACTN4	-1.65	7.56	1.96676e-06	1.1583e-05	6.73	8.39	6.59	6.87	8.39	8.38
ENSMUSG00000034731.11	Dgkh	DGKH	-1.65	6.46	4.24741e-06	1.94957e-05	5.64	7.29	5.81	5.47	7.29	7.28
ENSMUSG00000015889.8	Lta4h	LTA4H	-1.65	6.59	7.84238e-06	3.01272e-05	5.77	7.42	5.57	5.96	7.42	7.41
ENSMUSG00000048776.8	Pthlh	PTHLH	-1.65	-0.55	0.000433796	0.000795419	-1.29	0.3	-1.51	-1.25	0.34	0.21
ENSMUSG00000024357.10	Sil1	SIL1	-1.64	5.12	9.15948e-08	2.6334e-06	4.3	5.94	4.3	4.3	5.93	5.94
ENSMUSG00000020680.15	Taf15	TAF15	-1.64	4.69	1.27303e-07	2.96241e-06	3.87	5.51	3.88	3.85	5.51	5.51
ENSMUSG00000035863.14	Palm	PALM	-1.64	5.69	2.02999e-07	3.5034e-06	4.87	6.51	4.82	4.91	6.46	6.56
ENSMUSG00000046707.9	Csnk2a2	CSNK2A2	-1.64	6.01	2.24105e-07	3.6806e-06	5.19	6.84	5.26	5.12	6.83	6.84
ENSMUSG00000010453.12	Kansl3	KANSL3	-1.64	5.97	4.40713e-07	4.86608e-06	5.15	6.79	5.25	5.06	6.78	6.8
ENSMUSG00000058254.12	Tspan7	TSPAN7	-1.64	5.98	6.80739e-07	6.15753e-06	5.15	6.8	5.05	5.26	6.78	6.81
ENSMUSG00000020471.11	Pold2	POLD2	-1.64	6.09	7.01923e-07	6.21453e-06	5.27	6.92	5.16	5.38	6.89	6.94
ENSMUSG00000043929.16	Klhl15	KLHL15	-1.64	3.33	1.00576e-06	7.6538e-06	2.52	4.15	2.54	2.48	4.2	4.09
ENSMUSG00000040296.15	Ddx58	DDX58	-1.64	2.78	1.71006e-06	1.05786e-05	1.97	3.59	2.01	1.91	3.6	3.59
ENSMUSG00000029119.9	Man2b2	MAN2B2	-1.64	3.88	1.56865e-06	9.98913e-06	3.07	4.71	2.95	3.18	4.68	4.74
ENSMUSG00000031837.14	Necab2	NECAB2	-1.64	2.37	2.87115e-06	1.5018e-05	1.56	3.19	1.52	1.57	3.2	3.17
ENSMUSG00000040761.16	Spen	SPEN	-1.64	4.56	2.25234e-06	1.2707e-05	3.75	5.38	3.89	3.6	5.38	5.38
ENSMUSG00000050965.14	Prkca	PRKCA	-1.63	4.57	1.49126e-07	3.13352e-06	3.76	5.39	3.78	3.74	5.4	5.38
ENSMUSG00000026426.10	Arl8a	ARL8A	-1.63	4.41	1.86709e-07	3.41897e-06	3.59	5.22	3.62	3.57	5.22	5.23
ENSMUSG00000014905.4	Dnajb9	DNAJB9	-1.63	4.27	3.09906e-07	4.11718e-06	3.46	5.08	3.51	3.41	5.1	5.07
ENSMUSG00000032437.10	Stt3b	STT3B	-1.63	7.82	5.65318e-07	5.58545e-06	7	8.64	6.91	7.1	8.63	8.64
ENSMUSG00000047022.18	Mipol1	MIPOL1	-1.63	4.48	6.23266e-07	5.85255e-06	3.67	5.29	3.58	3.76	5.3	5.29
ENSMUSG00000030432.12	Rpl28	RPL28	-1.63	10.03	6.91531e-07	6.1833e-06	9.21	10.84	9.14	9.29	10.85	10.84
ENSMUSG00000019590.16	Cyb561	CYB561	-1.63	4.9	9.24036e-07	7.28956e-06	4.08	5.71	3.97	4.2	5.71	5.72
ENSMUSG00000033307.7	Mif	MIF	-1.63	9.55	9.88815e-07	7.56145e-06	8.73	10.37	8.64	8.83	10.35	10.39
ENSMUSG00000026782.15	Abi2	ABI2	-1.63	6.42	1.68229e-06	1.04968e-05	5.61	7.24	5.47	5.75	7.24	7.24
ENSMUSG00000056596.8	Trnp1	TRNP1	-1.63	2.52	2.32319e-06	1.29842e-05	1.72	3.34	1.74	1.68	3.35	3.32
ENSMUSG00000101523.1	Gm10031	GM10031	-1.63	5.4	1.71894e-06	1.06074e-05	4.59	6.22	4.45	4.73	6.19	6.25
ENSMUSG00000057762.6	Gm6169	GM6169	-1.63	4.41	1.86368e-06	1.12358e-05	3.59	5.22	3.46	3.73	5.22	5.23
ENSMUSG00000060802.8	B2m	B2M	-1.63	8.2	1.86822e-06	1.12469e-05	7.38	9.02	7.25	7.52	9.04	9
ENSMUSG00000019087.13	Atp6ap1	ATP6AP1	-1.63	7.51	1.87671e-06	1.1271e-05	6.7	8.32	6.56	6.83	8.33	8.31
ENSMUSG00000039883.5	Lrrc17	LRRC17	-1.63	1.1	2.77065e-05	7.94961e-05	0.32	1.92	0.34	0.23	1.9	1.93
ENSMUSG00000020847.15	Rph3al	RPH3AL	-1.63	0.71	6.26188e-05	0.000153272	-0.07	1.54	-0.21	-0.01	1.52	1.54
ENSMUSG00000049723.14	Mmp12	MMP12	-1.63	3.28	5.40059e-05	0.000136169	2.47	4.09	2.75	2.18	4.09	4.09
ENSMUSG00000090053.9	Palm2	PALM2	-1.63	1.15	0.00035322	0.000663159	0.37	1.96	0.11	0.57	2.18	1.73
ENSMUSG00000030022.14	Adamts9	ADAMTS9	-1.63	0.82	0.000492786	0.00088982	0.04	1.64	0.38	-0.36	1.61	1.66
ENSMUSG00000048347.5	Pcdhb18	PCDHB18	-1.63	-0.72	0.00112865	0.00186144	-1.43	0.12	-1.24	-1.83	0.17	0.02
ENSMUSG00000047197.1	Gjd3	GJD3	-1.63	-3.02	0.00668991	0.00930706	-3.4	-2.08	-3.69	-3.98	-2.24	-2.17
ENSMUSG00000017291.13	Taok1	TAOK1	-1.62	7.15	9.54982e-08	2.66631e-06	6.34	7.96	6.33	6.35	7.98	7.95
ENSMUSG00000035623.14	Rsf1	RSF1	-1.62	6.16	1.15838e-07	2.86811e-06	5.35	6.97	5.3	5.38	6.97	6.97
ENSMUSG00000013787.15	Ehmt2	EHMT2	-1.62	7.76	1.35283e-07	3.00526e-06	6.95	8.57	6.92	6.97	8.55	8.59
ENSMUSG00000001552.14	Jup	JUP	-1.62	6.07	1.66651e-07	3.27157e-06	5.27	6.88	5.21	5.32	6.89	6.88
ENSMUSG00000024805.16	Pcgf5	PCGF5	-1.62	5.56	1.82923e-07	3.36985e-06	4.75	6.36	4.69	4.81	6.36	6.36
ENSMUSG00000052253.6	Zfp622	ZFP622	-1.62	6.26	2.04712e-07	3.51367e-06	5.46	7.07	5.39	5.51	7.09	7.06
ENSMUSG00000045005.9	Fzd5	FZD5	-1.62	3.65	7.54339e-07	6.46416e-06	2.85	4.46	2.89	2.79	4.5	4.42
ENSMUSG00000015305.6	Sash1	SASH1	-1.62	3.24	7.92906e-07	6.66338e-06	2.44	4.04	2.45	2.41	4.06	4.03
ENSMUSG00000050953.10	Gja1	GJA1	-1.62	8.27	9.60838e-07	7.46702e-06	7.46	9.07	7.35	7.56	9.08	9.07
ENSMUSG00000055435.6	Maf	MAF	-1.62	3.05	1.27493e-06	8.79637e-06	2.25	3.87	2.27	2.22	3.91	3.82
ENSMUSG00000028053.13	Ash1l	ASH1L	-1.62	6	1.27287e-06	8.78701e-06	5.2	6.81	5.32	5.07	6.83	6.79
ENSMUSG00000028217.11	Cdh17	CDH17	-1.62	2.8	1.92896e-06	1.14534e-05	1.99	3.61	1.92	2.05	3.61	3.61
ENSMUSG00000000567.5	Sox9	SOX9	-1.62	4.33	1.9131e-06	1.13862e-05	3.52	5.13	3.64	3.39	5.17	5.09
ENSMUSG00000036985.12	Zdhhc9	ZDHHC9	-1.62	3.05	2.35104e-06	1.30991e-05	2.24	3.86	2.31	2.17	3.92	3.8
ENSMUSG00000041638.18	Gcn1l1	GCN1L1	-1.62	7.7	2.32291e-06	1.29842e-05	6.88	8.5	7.03	6.74	8.49	8.52
ENSMUSG00000003070.6	Efna2	EFNA2	-1.62	0.45	0.000180621	0.000372999	-0.32	1.27	-0.52	-0.22	1.15	1.38
ENSMUSG00000039496.8	Cdnf	CDNF	-1.62	-0.22	0.00123434	0.00201642	-0.96	0.62	-1.41	-0.65	0.65	0.54
ENSMUSG00000028707.15	Dmbx1	DMBX1	-1.62	-1.92	0.00453664	0.00652378	-2.52	-1.04	-3	-2.49	-1.34	-0.87
ENSMUSG00000014426.9	Map3k4	MAP3K4	-1.61	5.57	1.72196e-07	3.30226e-06	4.77	6.38	4.71	4.82	6.36	6.4
ENSMUSG00000062929.8	Cfl2	CFL2	-1.61	7.48	1.82211e-07	3.3689e-06	6.67	8.28	6.63	6.72	8.3	8.26
ENSMUSG00000025509.15	Pnpla2	PNPLA2	-1.61	4.4	2.01701e-07	3.48607e-06	3.6	5.21	3.59	3.6	5.18	5.23
ENSMUSG00000025232.8	Hexa	HEXA	-1.61	5.93	2.2244e-07	3.67245e-06	5.13	6.73	5.07	5.19	6.71	6.76
ENSMUSG00000005683.8	Cs	CS	-1.61	8.11	5.01046e-07	5.22269e-06	7.3	8.91	7.22	7.39	8.9	8.92
ENSMUSG00000019528.18	Gyg	GYG	-1.61	4.92	7.54703e-07	6.46416e-06	4.12	5.72	4.01	4.22	5.72	5.73
ENSMUSG00000029826.14	Zc3hav1	ZC3HAV1	-1.61	5.93	9.43994e-07	7.38502e-06	5.12	6.74	5.01	5.24	6.74	6.73
ENSMUSG00000030314.16	Atg7	ATG7	-1.61	3.81	2.28656e-06	1.28593e-05	3	4.62	2.87	3.13	4.6	4.63
ENSMUSG00000072812.4	Ahnak2	AHNAK2	-1.61	5.87	2.1514e-06	1.23426e-05	5.06	6.68	5.2	4.93	6.62	6.73
ENSMUSG00000034959.8	Rubcnl	RUBCNL	-1.61	2.95	3.71167e-06	1.77314e-05	2.16	3.76	2.1	2.19	3.67	3.85
ENSMUSG00000034371.9	Tkfc	TKFC	-1.61	2.8	7.92041e-06	3.03483e-05	2	3.6	1.86	2.13	3.67	3.54
ENSMUSG00000030352.15	Tspan9	TSPAN9	-1.61	4.42	9.07549e-06	3.35169e-05	3.62	5.22	3.42	3.81	5.2	5.24
ENSMUSG00000041763.14	Tpp2	TPP2	-1.6	6.83	9.22637e-08	2.63941e-06	6.04	7.63	6.04	6.03	7.63	7.64
ENSMUSG00000053716.9	Dusp7	DUSP7	-1.6	4.99	1.15216e-07	2.86811e-06	4.19	5.8	4.18	4.2	5.8	5.79
ENSMUSG00000020922.11	Lsm12	LSM12	-1.6	6.03	1.25547e-07	2.96241e-06	5.23	6.84	5.26	5.21	6.86	6.8
ENSMUSG00000038150.7	Ormdl3	ORMDL3	-1.6	5.14	2.01022e-07	3.48607e-06	4.34	5.94	4.3	4.39	5.91	5.97
ENSMUSG00000035064.17	Eef2k	EEF2K	-1.6	5.59	2.3537e-07	3.71408e-06	4.8	6.39	4.74	4.85	6.36	6.42
ENSMUSG00000038539.15	Atf5	ATF5	-1.6	4.63	2.63615e-07	3.85123e-06	3.83	5.43	3.8	3.86	5.47	5.39
ENSMUSG00000049106.7	Dcaf5	DCAF5	-1.6	5.22	2.7796e-07	3.95032e-06	4.42	6.03	4.35	4.49	6.02	6.03
ENSMUSG00000019699.16	Akt3	AKT3	-1.6	5.93	2.99211e-07	4.0685e-06	5.13	6.72	5.06	5.2	6.75	6.7
ENSMUSG00000024294.14	Mib1	MIB1	-1.6	7.71	3.48353e-07	4.3248e-06	6.91	8.51	6.84	6.98	8.52	8.5
ENSMUSG00000031146.6	Plp2	PLP2	-1.6	7.52	3.62857e-07	4.38877e-06	6.71	8.31	6.64	6.78	8.35	8.28
ENSMUSG00000048109.10	Rbm15	RBM15	-1.6	6.64	5.94676e-07	5.7347e-06	5.85	7.45	5.94	5.75	7.43	7.46
ENSMUSG00000024474.7	Ik	IK	-1.6	6.25	7.16557e-07	6.28688e-06	5.46	7.04	5.35	5.56	7.04	7.05
ENSMUSG00000054823.16	Nsd3	NSD3	-1.6	5.57	8.2305e-07	6.7853e-06	4.77	6.37	4.88	4.65	6.36	6.38
ENSMUSG00000029684.14	Wasl	WASL	-1.6	4.83	8.94196e-07	7.17769e-06	4.03	5.62	4.13	3.92	5.66	5.59
ENSMUSG00000050310.9	Rictor	RICTOR	-1.6	6.62	1.45316e-06	9.5141e-06	5.82	7.42	5.94	5.69	7.41	7.42
ENSMUSG00000024556.4	Me2	ME2	-1.6	7.1	1.52642e-06	9.8399e-06	6.3	7.91	6.17	6.43	7.91	7.9
ENSMUSG00000021366.8	Hivep1	HIVEP1	-1.6	4.06	4.75134e-06	2.10567e-05	3.27	4.86	3.42	3.1	4.88	4.83
ENSMUSG00000024910.5	Ctsw	CTSW	-1.6	2.42	6.5795e-06	2.66575e-05	1.63	3.22	1.73	1.51	3.23	3.19
ENSMUSG00000044786.6	Zfp36	ZFP36	-1.6	3.85	2.78737e-05	7.98507e-05	3.06	4.66	3.3	2.81	4.69	4.62
ENSMUSG00000027215.13	Cd82	CD82	-1.6	3.32	4.49221e-05	0.000117217	2.52	4.12	2.25	2.78	4.09	4.15
ENSMUSG00000057054.11	Inca1	INCA1	-1.6	-0.6	0.000628084	0.00110537	-1.31	0.22	-1.33	-1.46	0.34	0.05
ENSMUSG00000016028.10	Celsr1	CELSR1	-1.6	1.05	0.000656194	0.00114848	0.28	1.86	0.65	-0.15	1.77	1.93
ENSMUSG00000058297.16	Spock2	SPOCK2	-1.6	-1.83	0.00360466	0.0052951	-2.42	-0.98	-2.35	-2.92	-1.14	-0.93
ENSMUSG00000013663.7	Pten	PTEN	-1.59	7.18	1.18937e-07	2.89037e-06	6.38	7.97	6.37	6.4	7.99	7.96
ENSMUSG00000006498.16	Ptbp1	PTBP1	-1.59	8.22	1.41276e-07	3.06648e-06	7.43	9.02	7.41	7.44	9.01	9.02
ENSMUSG00000029227.15	Fip1l1	FIP1L1	-1.59	7.07	1.66407e-07	3.27157e-06	6.28	7.86	6.23	6.32	7.85	7.87
ENSMUSG00000024962.13	Vegfb	VEGFB	-1.59	4.21	2.54193e-07	3.80201e-06	3.42	5	3.41	3.42	5.02	4.98
ENSMUSG00000051285.17	Pcmtd1	PCMTD1	-1.59	5.33	2.93782e-07	4.02516e-06	4.54	6.12	4.48	4.6	6.16	6.09
ENSMUSG00000055013.15	Agap1	AGAP1	-1.59	5.24	3.59209e-07	4.38877e-06	4.45	6.03	4.52	4.37	6.01	6.05
ENSMUSG00000048661.14	Lemd3	LEMD3	-1.59	4.63	3.95784e-07	4.58307e-06	3.84	5.42	3.76	3.9	5.42	5.43
ENSMUSG00000059970.7	Hspa2	HSPA2	-1.59	3.95	9.25739e-07	7.29237e-06	3.16	4.74	3.06	3.24	4.73	4.75
ENSMUSG00000102918.1	Pcdhgc3	PCDHGC3	-1.59	6.33	9.86119e-07	7.56145e-06	5.53	7.12	5.42	5.64	7.1	7.15
ENSMUSG00000025323.10	Sp4	SP4	-1.59	3.45	1.27765e-06	8.81033e-06	2.66	4.24	2.63	2.68	4.31	4.18
ENSMUSG00000021715.12	Cwc27	CWC27	-1.59	4.66	2.05733e-06	1.19946e-05	3.87	5.45	3.74	3.99	5.4	5.5
ENSMUSG00000005580.11	Adcy9	ADCY9	-1.59	2.4	6.41526e-06	2.61693e-05	1.62	3.2	1.67	1.55	3.26	3.12
ENSMUSG00000002455.14	Prpf6	PRPF6	-1.59	6.51	5.43189e-06	2.31008e-05	5.71	7.3	5.54	5.88	7.32	7.28
ENSMUSG00000024900.5	Cpt1a	CPT1A	-1.59	4.99	6.0931e-06	2.5116e-05	4.2	5.79	4.01	4.38	5.78	5.79
ENSMUSG00000040054.16	Baz2a	BAZ2A	-1.59	5.07	1.35217e-05	4.50119e-05	4.28	5.87	4.49	4.06	5.86	5.87
ENSMUSG00000040867.12	Begain	BEGAIN	-1.59	-0.39	0.00197148	0.00306556	-1.1	0.42	-0.76	-1.61	0.36	0.45
ENSMUSG00000031980.9	Agt	AGT	-1.59	-1.92	0.0104313	0.014002	-2.5	-1.05	-2.53	-2.92	-1.58	-0.64
ENSMUSG00000034158.9	Lrrc58	LRRC58	-1.58	7.32	1.14076e-07	2.86811e-06	6.54	8.11	6.52	6.55	8.11	8.12
ENSMUSG00000034220.7	Gpc1	GPC1	-1.58	6.91	1.30754e-07	2.96241e-06	6.12	7.7	6.08	6.15	7.7	7.7
ENSMUSG00000052684.4	Jun	JUN	-1.58	5.8	1.33855e-07	2.99244e-06	5.02	6.59	5.04	4.98	6.57	6.61
ENSMUSG00000036863.12	Syde2	SYDE2	-1.58	4.92	1.44488e-07	3.10284e-06	4.13	5.71	4.15	4.11	5.72	5.7
ENSMUSG00000074994.5	Qser1	QSER1	-1.58	4.85	1.76138e-07	3.31783e-06	4.06	5.64	4.1	4.03	5.65	5.64
ENSMUSG00000018501.17	Ncor1	NCOR1	-1.58	6.63	2.3495e-07	3.71408e-06	5.84	7.42	5.9	5.78	7.41	7.42
ENSMUSG00000019804.12	Snx3	SNX3	-1.58	7.3	2.52374e-07	3.80131e-06	6.51	8.09	6.45	6.57	8.11	8.08
ENSMUSG00000038518.15	Jarid2	JARID2	-1.58	4.71	3.11441e-07	4.11718e-06	3.92	5.5	3.98	3.86	5.51	5.48
ENSMUSG00000026718.17	Stam	STAM	-1.58	6.51	3.59455e-07	4.38877e-06	5.72	7.3	5.64	5.8	7.3	7.3
ENSMUSG00000036918.16	Ttc7	TTC7	-1.58	3.98	4.97321e-07	5.20695e-06	3.19	4.77	3.17	3.19	4.72	4.82
ENSMUSG00000022757.19	Tfg	TFG	-1.58	6.05	5.50669e-07	5.53488e-06	5.27	6.84	5.17	5.35	6.84	6.83
ENSMUSG00000027680.15	Fxr1	FXR1	-1.58	7.96	6.84128e-07	6.17294e-06	7.17	8.75	7.08	7.26	8.77	8.73
ENSMUSG00000066568.12	Lsm14a	LSM14A	-1.58	6.64	6.64119e-07	6.06836e-06	5.86	7.43	5.76	5.95	7.44	7.42
ENSMUSG00000046668.9	Cxxc5	CXXC5	-1.58	4.79	2.14171e-06	1.23047e-05	4	5.58	3.86	4.14	5.59	5.57
ENSMUSG00000046324.12	Ermp1	ERMP1	-1.58	4.85	2.93927e-06	1.52222e-05	4.06	5.64	3.9	4.21	5.63	5.65
ENSMUSG00000036278.7	Macrod1	MACROD1	-1.58	2.25	8.90025e-06	3.30836e-05	1.48	3.04	1.58	1.35	3.04	3.04
ENSMUSG00000022330.5	Osr2	OSR2	-1.58	0.88	0.000177075	0.000366622	0.12	1.67	0.33	-0.15	1.62	1.71
ENSMUSG00000050138.8	Kcnk12	KCNK12	-1.58	-2.95	0.00959861	0.0129604	-3.33	-2.04	-3.48	-3.98	-1.98	-2.34
ENSMUSG00000070806.5	Zmynd12	ZMYND12	-1.58	-1.48	0.0289799	0.0362473	-2.09	-0.64	-3.14	-1.42	-0.96	-0.4
ENSMUSG00000002052.6	Supt6	SUPT6	-1.57	6.17	1.16032e-07	2.86811e-06	5.38	6.96	5.41	5.36	6.96	6.95
ENSMUSG00000081534.3	Slc48a1	SLC48A1	-1.57	5.29	1.62393e-07	3.23858e-06	4.51	6.08	4.47	4.55	6.08	6.06
ENSMUSG00000033159.14	Cnppd1	CNPPD1	-1.57	5.85	1.66114e-07	3.27157e-06	5.06	6.63	5.02	5.11	6.63	6.64
ENSMUSG00000053819.16	Camk2d	CAMK2D	-1.57	5.19	1.78016e-07	3.33745e-06	4.41	5.97	4.45	4.36	5.96	5.98
ENSMUSG00000024238.15	Zeb1	ZEB1	-1.57	5.1	2.33586e-07	3.71408e-06	4.32	5.89	4.34	4.3	5.94	5.84
ENSMUSG00000028063.15	Lmna	LMNA	-1.57	8.84	2.71367e-07	3.89651e-06	8.06	9.62	8.05	8.07	9.59	9.66
ENSMUSG00000056749.7	Nfil3	NFIL3	-1.57	6.14	4.91257e-07	5.18233e-06	5.36	6.93	5.27	5.44	6.93	6.93
ENSMUSG00000030515.9	Tarsl2	TARSL2	-1.57	4.01	5.60259e-07	5.57495e-06	3.23	4.8	3.16	3.28	4.8	4.79
ENSMUSG00000031609.3	Sap30	SAP30	-1.57	7.24	5.7529e-07	5.63003e-06	6.46	8.03	6.55	6.37	8.03	8.03
ENSMUSG00000034485.10	Uaca	UACA	-1.57	4.83	6.05525e-07	5.78433e-06	4.05	5.62	3.98	4.11	5.56	5.68
ENSMUSG00000026499.5	Acbd3	ACBD3	-1.57	5.38	6.75299e-07	6.12596e-06	4.6	6.16	4.5	4.69	6.15	6.17
ENSMUSG00000029163.9	Emilin1	EMILIN1	-1.57	3.31	1.22014e-06	8.56892e-06	2.53	4.1	2.47	2.58	4.11	4.07
ENSMUSG00000025982.13	Sf3b1	SF3B1	-1.57	9.34	1.12398e-06	8.10662e-06	8.55	10.12	8.46	8.65	10.13	10.12
ENSMUSG00000031715.14	Smarca5	SMARCA5	-1.57	8.08	1.07162e-06	7.89537e-06	7.3	8.87	7.2	7.4	8.89	8.84
ENSMUSG00000050359.7	Sprr1a	SPRR1A	-1.57	6.66	1.49606e-06	9.70603e-06	5.88	7.44	5.75	6	7.44	7.44
ENSMUSG00000004637.15	Wwox	WWOX	-1.57	3.67	2.24094e-06	1.2654e-05	2.89	4.46	2.78	2.99	4.41	4.51
ENSMUSG00000011148.14	Adssl1	ADSSL1	-1.57	3.25	4.09535e-06	1.90218e-05	2.48	4.04	2.34	2.6	4.04	4.03
ENSMUSG00000022048.8	Dpysl2	DPYSL2	-1.57	6.08	4.21843e-06	1.94212e-05	5.3	6.87	5.14	5.46	6.85	6.89
ENSMUSG00000031245.8	Hmgn5	HMGN5	-1.57	2.02	0.000134676	0.000289588	1.25	2.82	0.97	1.51	2.93	2.69
ENSMUSG00000025409.14	Mbd6	MBD6	-1.57	2.87	0.000162351	0.000340286	2.1	3.66	2.4	1.78	3.76	3.54
ENSMUSG00000030827.5	Fgf21	FGF21	-1.57	-1.29	0.00634635	0.00885853	-1.92	-0.46	-1.56	-2.58	-0.61	-0.4
ENSMUSG00000046230.11	Vps13a	VPS13A	-1.56	5.83	1.01704e-07	2.73621e-06	5.05	6.61	5.05	5.06	6.62	6.6
ENSMUSG00000038545.13	Cul7	CUL7	-1.56	5.66	1.14209e-07	2.86811e-06	4.88	6.44	4.9	4.86	6.44	6.43
ENSMUSG00000071659.4	Hnrnpul2	HNRNPUL2	-1.56	6.26	1.33649e-07	2.99244e-06	5.47	7.04	5.5	5.45	7.07	7.01
ENSMUSG00000063659.11	Zbtb18	ZBTB18	-1.56	5.42	1.75048e-07	3.30226e-06	4.63	6.2	4.59	4.68	6.21	6.18
ENSMUSG00000004099.16	Dnmt1	DNMT1	-1.56	7.3	3.15001e-07	4.11718e-06	6.53	8.09	6.59	6.46	8.09	8.08
ENSMUSG00000025366.8	Esyt1	ESYT1	-1.56	5.34	3.7265e-07	4.44632e-06	4.55	6.12	4.48	4.63	6.13	6.1
ENSMUSG00000021665.9	Hexb	HEXB	-1.56	6.16	4.96064e-07	5.19975e-06	5.38	6.95	5.29	5.47	6.95	6.94
ENSMUSG00000051184.7	Zfp524	ZFP524	-1.56	3.35	2.49188e-06	1.3624e-05	2.57	4.13	2.47	2.67	4.1	4.17
ENSMUSG00000042496.18	Prdm10	PRDM10	-1.56	3.92	2.57317e-06	1.39126e-05	3.15	4.7	3.27	3.02	4.71	4.68
ENSMUSG00000032198.9	Dock6	DOCK6	-1.56	2.89	3.08726e-05	8.65039e-05	2.12	3.67	2.32	1.9	3.74	3.6
ENSMUSG00000035773.6	Kiss1r	KISS1R	-1.56	-0.78	0.000983139	0.0016463	-1.46	0.03	-1.41	-1.71	-0.12	0.12
ENSMUSG00000025757.12	Hspa4l	HSPA4L	-1.55	6.85	1.14061e-07	2.86811e-06	6.08	7.63	6.08	6.08	7.62	7.64
ENSMUSG00000058325.6	Dock1	DOCK1	-1.55	5.76	1.31289e-07	2.96241e-06	4.99	6.54	5.02	4.96	6.55	6.53
ENSMUSG00000024826.15	Dpf2	DPF2	-1.55	5.42	1.62107e-07	3.23801e-06	4.65	6.2	4.63	4.67	6.23	6.16
ENSMUSG00000028868.13	Wasf2	WASF2	-1.55	5.61	1.92632e-07	3.45954e-06	4.84	6.39	4.86	4.82	6.44	6.34
ENSMUSG00000024429.9	Gnl1	GNL1	-1.55	5.85	2.52993e-07	3.80131e-06	5.08	6.62	5.02	5.14	6.61	6.64
ENSMUSG00000039361.11	Picalm	PICALM	-1.55	7.63	2.74902e-07	3.9204e-06	6.86	8.41	6.8	6.91	8.41	8.4
ENSMUSG00000025857.10	Dnaaf5	DNAAF5	-1.55	4.78	4.46852e-07	4.91616e-06	4	5.55	4.08	3.93	5.56	5.55
ENSMUSG00000056608.14	Chd9	CHD9	-1.55	4.3	6.68281e-07	6.08868e-06	3.54	5.07	3.57	3.48	5.13	5.02
ENSMUSG00000038451.13	Spsb2	SPSB2	-1.55	2.9	1.8878e-06	1.12934e-05	2.13	3.67	2.13	2.11	3.71	3.64
ENSMUSG00000025190.13	Got1	GOT1	-1.55	6.69	1.70299e-06	1.05599e-05	5.92	7.46	5.79	6.04	7.44	7.49
ENSMUSG00000050567.16	Maml1	MAML1	-1.55	4.18	2.61403e-06	1.40714e-05	3.41	4.96	3.54	3.28	4.98	4.93
ENSMUSG00000017707.9	Serinc3	SERINC3	-1.55	6.59	3.24714e-06	1.62409e-05	5.81	7.37	5.67	5.96	7.35	7.38
ENSMUSG00000024740.10	Ddb1	DDB1	-1.55	10.02	1.04746e-05	3.72115e-05	9.25	10.8	9.07	9.42	10.78	10.81
ENSMUSG00000068794.7	Col28a1	COL28A1	-1.55	-0.94	0.00116033	0.00190737	-1.6	-0.14	-1.61	-1.83	-0.03	-0.31
ENSMUSG00000041205.8	Map6d1	MAP6D1	-1.55	-1.63	0.00460841	0.00661489	-2.23	-0.8	-2.75	-2.08	-1.01	-0.69
ENSMUSG00000048621.3	Gm6377	GM6377	-1.55	-2.06	0.00490076	0.00699297	-2.61	-1.21	-3	-2.69	-1.5	-1.07
ENSMUSG00000022020.15	Naa16	NAA16	-1.54	6.09	1.08292e-07	2.82608e-06	5.32	6.86	5.33	5.31	6.85	6.87
ENSMUSG00000035901.14	Dennd5a	DENND5A	-1.54	6.82	1.29418e-07	2.96241e-06	6.05	7.59	6.04	6.06	7.57	7.61
ENSMUSG00000030516.14	Tjp1	TJP1	-1.54	6.59	1.63436e-07	3.25421e-06	5.82	7.37	5.8	5.84	7.4	7.33
ENSMUSG00000027276.7	Jag1	JAG1	-1.54	5.22	1.7731e-07	3.33491e-06	4.45	5.98	4.48	4.42	5.96	6.01
ENSMUSG00000054843.9	Atrnl1	ATRNL1	-1.54	5.99	1.86733e-07	3.41897e-06	5.22	6.75	5.17	5.27	6.75	6.76
ENSMUSG00000001441.13	Npepps	NPEPPS	-1.54	6.54	1.96929e-07	3.47083e-06	5.78	7.32	5.73	5.82	7.31	7.32
ENSMUSG00000024043.13	Arhgap28	ARHGAP28	-1.54	4.72	2.17647e-07	3.66236e-06	3.96	5.49	3.97	3.94	5.52	5.47
ENSMUSG00000032187.16	Smarca4	SMARCA4	-1.54	7.42	2.57325e-07	3.81738e-06	6.65	8.2	6.71	6.6	8.2	8.19
ENSMUSG00000039236.18	Isg20	ISG20	-1.54	4.86	2.75989e-07	3.93144e-06	4.09	5.63	4.04	4.13	5.6	5.66
ENSMUSG00000027227.7	Sord	SORD	-1.54	6.69	3.30502e-07	4.21566e-06	5.92	7.46	5.85	5.98	7.43	7.48
ENSMUSG00000020948.9	Klhl28	KLHL28	-1.54	3.99	4.76283e-07	5.08413e-06	3.22	4.76	3.18	3.26	4.77	4.76
ENSMUSG00000024853.10	Sf3b2	SF3B2	-1.54	8.02	1.05647e-06	7.83144e-06	7.25	8.8	7.15	7.35	8.78	8.81
ENSMUSG00000032097.10	Ddx6	DDX6	-1.54	6.91	1.16005e-06	8.26241e-06	6.14	7.68	6.03	6.25	7.7	7.66
ENSMUSG00000028420.13	Tmem38b	TMEM38B	-1.54	3.41	1.51103e-06	9.7761e-06	2.64	4.19	2.56	2.72	4.19	4.18
ENSMUSG00000025261.17	Huwe1	HUWE1	-1.54	7.24	1.3744e-06	9.20957e-06	6.47	8.02	6.59	6.36	8.03	8
ENSMUSG00000037993.8	Dhx38	DHX38	-1.54	5.65	1.4523e-06	9.5141e-06	4.88	6.42	5	4.75	6.4	6.44
ENSMUSG00000008348.9	Ubc	UBC	-1.54	8.79	1.68715e-06	1.05093e-05	8.02	9.57	7.91	8.13	9.56	9.57
ENSMUSG00000028382.15	Ptbp3	PTBP3	-1.54	6.96	4.79689e-06	2.11971e-05	6.19	7.74	6.03	6.35	7.74	7.73
ENSMUSG00000049288.4	Lix1l	LIX1L	-1.54	6.46	9.90103e-06	3.56846e-05	5.69	7.22	5.5	5.88	7.23	7.22
ENSMUSG00000043099.4	Hic1	HIC1	-1.54	-0.86	0.0014071	0.00226729	-1.52	-0.06	-1.37	-1.89	-0.09	-0.08
ENSMUSG00000027646.15	Src	SRC	-1.53	6	1.30476e-07	2.96241e-06	5.23	6.77	5.21	5.26	6.78	6.75
ENSMUSG00000030374.15	Strn4	STRN4	-1.53	6.55	1.36963e-07	3.01896e-06	5.79	7.32	5.76	5.81	7.31	7.33
ENSMUSG00000036779.12	Tent4b	TENT4B	-1.53	5.46	1.9397e-07	3.45954e-06	4.7	6.22	4.74	4.65	6.23	6.22
ENSMUSG00000034595.17	Ppp1r18	PPP1R18	-1.53	5.62	2.72623e-07	3.90563e-06	4.85	6.38	4.79	4.91	6.37	6.4
ENSMUSG00000058997.8	Vwa8	VWA8	-1.53	6.12	2.97824e-07	4.06518e-06	5.36	6.89	5.29	5.42	6.88	6.9
ENSMUSG00000019558.14	Slc6a8	SLC6A8	-1.53	5.93	7.3555e-07	6.40877e-06	5.17	6.7	5.26	5.07	6.72	6.67
ENSMUSG00000029713.15	Gnb2	GNB2	-1.53	8.53	8.56707e-07	6.96227e-06	7.76	9.29	7.68	7.84	9.26	9.32
ENSMUSG00000024587.10	Nars	NARS	-1.53	7.76	1.78332e-06	1.08871e-05	7	8.52	6.88	7.11	8.51	8.54
ENSMUSG00000073471.3	Rsph3a	RSPH3A	-1.53	4.33	2.60028e-06	1.40274e-05	3.57	5.1	3.43	3.69	5.08	5.11
ENSMUSG00000032604.16	Qars	QARS	-1.53	7.52	3.72327e-06	1.77559e-05	6.76	8.28	6.61	6.9	8.27	8.29
ENSMUSG00000029070.9	Mxra8	MXRA8	-1.53	4.28	4.09843e-06	1.90291e-05	3.52	5.04	3.37	3.67	5.07	5.02
ENSMUSG00000055633.6	Zfp580	ZFP580	-1.53	1.64	0.000174807	0.0003626	0.89	2.41	1.12	0.62	2.29	2.53
ENSMUSG00000047875.6	Gpr157	GPR157	-1.53	-1.1	0.00387236	0.00565068	-1.74	-0.29	-2.18	-1.56	-0.56	-0.08
ENSMUSG00000033174.17	Mgll	MGLL	-1.53	-2.42	0.00758683	0.0104416	-2.88	-1.57	-3	-3.35	-1.42	-1.9
ENSMUSG00000024472.9	Dcp2	DCP2	-1.52	6.21	1.16033e-07	2.86811e-06	5.46	6.97	5.46	5.45	6.97	6.97
ENSMUSG00000005069.12	Pex5	PEX5	-1.52	5.67	1.46402e-07	3.10786e-06	4.91	6.43	4.91	4.91	6.4	6.46
ENSMUSG00000054027.8	Nt5dc3	NT5DC3	-1.52	4.78	2.2549e-07	3.69069e-06	4.02	5.54	4.04	4	5.56	5.51
ENSMUSG00000023286.16	Ube2j2	UBE2J2	-1.52	6.22	2.22365e-07	3.67245e-06	5.46	6.99	5.41	5.51	6.98	6.99
ENSMUSG00000019977.16	Hbs1l	HBS1L	-1.52	6.81	2.49137e-07	3.78112e-06	6.05	7.56	6	6.1	7.57	7.56
ENSMUSG00000050812.18	Ecpas	ECPAS	-1.52	7.33	3.2824e-07	4.19107e-06	6.57	8.09	6.51	6.63	8.09	8.09
ENSMUSG00000009647.13	Mcu	MCU	-1.52	4.27	4.40188e-07	4.86608e-06	3.52	5.04	3.49	3.54	5	5.07
ENSMUSG00000045248.6	Med26	MED26	-1.52	3.76	6.40857e-07	5.93785e-06	3.01	4.52	3.02	2.99	4.49	4.55
ENSMUSG00000026547.15	Tagln2	TAGLN2	-1.52	7.93	7.91058e-07	6.66338e-06	7.16	8.68	7.07	7.25	8.69	8.68
ENSMUSG00000020097.14	Sgpl1	SGPL1	-1.52	6.9	9.24249e-07	7.28956e-06	6.13	7.66	6.03	6.23	7.67	7.65
ENSMUSG00000041815.14	Poldip3	POLDIP3	-1.52	7.07	9.59654e-07	7.46702e-06	6.31	7.83	6.21	6.41	7.82	7.83
ENSMUSG00000060935.6	Tmem263	TMEM263	-1.52	6.26	1.05816e-06	7.83891e-06	5.49	7.02	5.39	5.6	7.05	6.99
ENSMUSG00000028599.10	Tnfrsf1b	TNFRSF1B	-1.52	4.69	1.12614e-06	8.11751e-06	3.93	5.45	3.82	4.03	5.46	5.43
ENSMUSG00000011832.15	Evi5l	EVI5L	-1.52	3	1.80038e-06	1.09487e-05	2.25	3.77	2.21	2.28	3.74	3.79
ENSMUSG00000024187.15	Fam234a	FAM234A	-1.52	5.18	1.57752e-06	1.00202e-05	4.42	5.94	4.3	4.54	5.94	5.94
ENSMUSG00000035873.8	Pawr	PAWR	-1.52	5.14	1.70515e-06	1.05599e-05	4.38	5.89	4.26	4.5	5.9	5.89
ENSMUSG00000033671.18	Cep350	CEP350	-1.52	5.32	2.10941e-06	1.22076e-05	4.56	6.07	4.69	4.42	6.09	6.06
ENSMUSG00000018415.14	Gid4	GID4	-1.52	4.76	2.6312e-06	1.41094e-05	4	5.52	3.87	4.13	5.56	5.48
ENSMUSG00000042121.16	Ssh1	SSH1	-1.52	3.59	3.28024e-06	1.63414e-05	2.84	4.34	2.92	2.74	4.42	4.27
ENSMUSG00000060376.7	Bckdha	BCKDHA	-1.52	6.01	3.35283e-06	1.65912e-05	5.25	6.76	5.11	5.39	6.72	6.81
ENSMUSG00000030729.17	Pgm2l1	PGM2L1	-1.52	4.13	4.14076e-06	1.91619e-05	3.38	4.89	3.24	3.5	4.84	4.95
ENSMUSG00000024055.15	Cyp4f13	CYP4F13	-1.52	2.35	5.44243e-06	2.31224e-05	1.6	3.12	1.53	1.65	3.11	3.12
ENSMUSG00000035835.14	Plppr3	PLPPR3	-1.52	4.33	4.9165e-06	2.15005e-05	3.58	5.09	3.7	3.45	5.01	5.18
ENSMUSG00000027082.15	Tfpi	TFPI	-1.52	1.43	2.48792e-05	7.2931e-05	0.69	2.2	0.71	0.63	2.24	2.14
ENSMUSG00000039477.16	Tnrc18	TNRC18	-1.52	6.24	2.78564e-05	7.9833e-05	5.48	7	5.71	5.24	6.99	7
ENSMUSG00000036882.7	Arhgap33	ARHGAP33	-1.52	0.49	0.000232172	0.000463017	-0.22	1.26	-0.12	-0.41	1.35	1.14
ENSMUSG00000039137.18	Whrn	WHRN	-1.52	4.94	0.000132987	0.00028668	4.18	5.7	4.5	3.86	5.67	5.73
ENSMUSG00000011171.11	Vipr2	VIPR2	-1.52	-1.8	0.00250019	0.00380157	-2.36	-0.98	-2.53	-2.58	-1.07	-1
ENSMUSG00000003153.10	Slc2a3	SLC2A3	-1.52	-2.21	0.00499101	0.00711287	-2.71	-1.38	-3.14	-2.8	-1.34	-1.56
ENSMUSG00000001240.13	Ramp2	RAMP2	-1.52	-2.16	0.0350748	0.0432973	-2.64	-1.34	-2.28	-3.53	-0.88	-1.94
ENSMUSG00000034022.8	Cpsf1	CPSF1	-1.51	6.65	1.35408e-07	3.00526e-06	5.89	7.4	5.89	5.9	7.42	7.39
ENSMUSG00000023830.14	Igf2r	IGF2R	-1.51	7.71	1.61236e-07	3.23605e-06	6.95	8.46	6.95	6.95	8.45	8.48
ENSMUSG00000038546.9	Ranbp9	RANBP9	-1.51	6.03	1.79257e-07	3.33853e-06	5.28	6.79	5.24	5.31	6.81	6.77
ENSMUSG00000025453.18	Nnt	NNT	-1.51	5.09	2.31503e-07	3.7079e-06	4.34	5.84	4.35	4.32	5.8	5.88
ENSMUSG00000049076.11	Acap2	ACAP2	-1.51	5.93	2.46194e-07	3.75843e-06	5.18	6.68	5.12	5.23	6.66	6.7
ENSMUSG00000042211.7	Fbxo38	FBXO38	-1.51	6.03	2.53845e-07	3.80131e-06	5.27	6.79	5.21	5.33	6.79	6.78
ENSMUSG00000022614.8	Lmf2	LMF2	-1.51	5.61	2.80492e-07	3.96412e-06	4.85	6.37	4.91	4.79	6.35	6.38
ENSMUSG00000029705.17	Cux1	CUX1	-1.51	6.93	2.91944e-07	4.01037e-06	6.18	7.69	6.24	6.12	7.69	7.68
ENSMUSG00000042046.15	Dstyk	DSTYK	-1.51	4.81	7.41668e-07	6.43415e-06	4.05	5.56	3.96	4.14	5.58	5.55
ENSMUSG00000026490.18	Cdc42bpa	CDC42BPA	-1.51	5.43	7.51198e-07	6.46416e-06	4.68	6.19	4.77	4.58	6.16	6.21
ENSMUSG00000029249.15	Rest	REST	-1.51	6.96	1.15038e-06	8.23082e-06	6.21	7.71	6.1	6.31	7.69	7.73
ENSMUSG00000028668.5	Eloa	ELOA	-1.51	6.58	1.19194e-06	8.43215e-06	5.82	7.34	5.72	5.93	7.34	7.34
ENSMUSG00000006019.15	Dhx34	DHX34	-1.51	4.3	2.36968e-06	1.31505e-05	3.54	5.05	3.66	3.42	5.03	5.08
ENSMUSG00000051853.10	Arf3	ARF3	-1.51	7	2.60346e-06	1.40325e-05	6.25	7.76	6.11	6.38	7.77	7.75
ENSMUSG00000018076.12	Med13l	MED13L	-1.51	5.92	4.88457e-06	2.1435e-05	5.17	6.68	5.32	5.01	6.66	6.69
ENSMUSG00000029094.12	Afap1	AFAP1	-1.51	4.96	5.84956e-06	2.44085e-05	4.21	5.71	4.37	4.04	5.73	5.7
ENSMUSG00000028430.14	Nol6	NOL6	-1.51	4.71	6.89899e-06	2.75784e-05	3.96	5.47	4.13	3.79	5.49	5.45
ENSMUSG00000004936.8	Map2k1	MAP2K1	-1.51	7.44	1.10086e-05	3.85163e-05	6.69	8.2	6.5	6.87	8.17	8.22
ENSMUSG00000055817.18	Mta3	MTA3	-1.51	2.72	4.16604e-05	0.00011031	1.98	3.48	1.75	2.19	3.44	3.53
ENSMUSG00000021750.15	Fam107a	FAM107A	-1.51	-2.08	0.00454438	0.00653343	-2.6	-1.25	-2.87	-2.8	-1.5	-1.14
ENSMUSG00000020135.13	Apc2	APC2	-1.51	-2.34	0.0206079	0.0263476	-2.8	-1.5	-2.44	-3.74	-1.5	-1.67
ENSMUSG00000036580.15	Spg20	SPG20	-1.5	5.44	1.49739e-07	3.13352e-06	4.69	6.19	4.67	4.7	6.17	6.2
ENSMUSG00000057177.12	Gsk3a	GSK3A	-1.5	5.49	1.7411e-07	3.30226e-06	4.74	6.24	4.74	4.74	6.27	6.21
ENSMUSG00000028381.8	Ugcg	UGCG	-1.5	6.35	2.17397e-07	3.66236e-06	5.59	7.1	5.56	5.63	7.13	7.07
ENSMUSG00000038412.8	Higd1a	HIGD1A	-1.5	8.24	2.52161e-07	3.80131e-06	7.49	8.98	7.52	7.46	8.98	8.99
ENSMUSG00000016520.7	Lnx2	LNX2	-1.5	4.34	4.4107e-07	4.86608e-06	3.59	5.09	3.56	3.63	5.12	5.06
ENSMUSG00000036432.8	Siah2	SIAH2	-1.5	4.11	4.80992e-07	5.10403e-06	3.36	4.86	3.32	3.4	4.87	4.85
ENSMUSG00000020671.9	Rab10	RAB10	-1.5	6.49	6.65739e-07	6.07447e-06	5.74	7.24	5.65	5.82	7.27	7.21
ENSMUSG00000032239.10	Rp9	RP9	-1.5	5.34	7.54769e-07	6.46416e-06	4.58	6.09	4.5	4.67	6.12	6.06
ENSMUSG00000029781.7	Fkbp9	FKBP9	-1.5	7.51	2.1789e-06	1.24492e-05	6.76	8.26	6.64	6.89	8.27	8.25
ENSMUSG00000020354.15	Sgcd	SGCD	-1.5	2.08	7.81209e-06	3.00708e-05	1.35	2.84	1.33	1.34	2.85	2.8
ENSMUSG00000039542.16	Ncam1	NCAM1	-1.5	5.38	7.30549e-06	2.87191e-05	4.62	6.13	4.45	4.8	6.1	6.16
ENSMUSG00000047881.14	Rell1	RELL1	-1.5	5.12	1.01224e-05	3.6202e-05	4.38	5.88	4.19	4.56	5.85	5.9
ENSMUSG00000031996.17	Aplp2	APLP2	-1.5	7.18	1.16333e-05	4.01429e-05	6.44	7.93	6.25	6.62	7.94	7.92
ENSMUSG00000030600.15	Lrfn1	LRFN1	-1.5	1.67	3.31371e-05	9.17162e-05	0.94	2.42	1.05	0.8	2.37	2.47
ENSMUSG00000031595.9	Pdgfrl	PDGFRL	-1.5	-0.69	0.0039075	0.00569666	-1.34	0.09	-1.84	-1.03	0.24	-0.12
ENSMUSG00000042492.12	Tbc1d10b	TBC1D10B	-1.49	5.72	1.31285e-07	2.96241e-06	4.98	6.47	4.98	4.98	6.47	6.47
ENSMUSG00000063550.8	Nup98	NUP98	-1.49	6.69	1.59668e-07	3.22002e-06	5.95	7.43	5.93	5.96	7.45	7.41
ENSMUSG00000041740.16	Rnf10	RNF10	-1.49	7.01	1.67191e-07	3.27705e-06	6.27	7.75	6.28	6.25	7.77	7.74
ENSMUSG00000042535.9	Gtpbp1	GTPBP1	-1.49	5.26	1.68653e-07	3.28702e-06	4.51	6.01	4.51	4.51	5.98	6.03
ENSMUSG00000031016.9	Wee1	WEE1	-1.49	5.35	1.93617e-07	3.45954e-06	4.61	6.1	4.63	4.58	6.12	6.07
ENSMUSG00000022781.8	Pak2	PAK2	-1.49	6.49	1.99146e-07	3.48202e-06	5.75	7.23	5.71	5.78	7.25	7.21
ENSMUSG00000042997.13	Nhlrc3	NHLRC3	-1.49	4.65	2.98163e-07	4.06518e-06	3.91	5.39	3.92	3.89	5.42	5.36
ENSMUSG00000038615.17	Nfe2l1	NFE2L1	-1.49	6.68	3.97612e-07	4.58852e-06	5.94	7.43	5.87	6	7.42	7.44
ENSMUSG00000025132.13	Arhgdia	ARHGDIA	-1.49	7.9	5.04296e-07	5.23159e-06	7.15	8.65	7.09	7.22	8.66	8.64
ENSMUSG00000034930.16	Rtkn	RTKN	-1.49	5.5	5.50488e-07	5.53488e-06	4.76	6.25	4.68	4.84	6.25	6.24
ENSMUSG00000021190.14	Lgmn	LGMN	-1.49	7.38	7.52174e-07	6.46416e-06	6.63	8.13	6.55	6.72	8.11	8.15
ENSMUSG00000024498.16	Tcerg1	TCERG1	-1.49	6.42	1.09624e-06	8.00301e-06	5.68	7.17	5.78	5.58	7.19	7.14
ENSMUSG00000022475.19	Hdac7	HDAC7	-1.49	5.47	1.41295e-06	9.38284e-06	4.72	6.21	4.84	4.61	6.2	6.22
ENSMUSG00000030770.15	Parva	PARVA	-1.49	5.88	1.52935e-06	9.85372e-06	5.13	6.62	5.02	5.25	6.6	6.65
ENSMUSG00000021585.10	Cast	CAST	-1.49	7.26	1.71733e-06	1.06027e-05	6.5	8	6.39	6.62	8.01	7.99
ENSMUSG00000007891.16	Ctsd	CTSD	-1.49	9.53	2.87875e-06	1.50327e-05	8.79	10.27	8.67	8.9	10.25	10.29
ENSMUSG00000030655.15	Smg1	SMG1	-1.49	6.99	3.60652e-06	1.74064e-05	6.24	7.73	6.38	6.1	7.75	7.72
ENSMUSG00000055204.15	Ankrd17	ANKRD17	-1.49	7.27	3.70286e-06	1.77027e-05	6.52	8.01	6.66	6.38	8.02	8
ENSMUSG00000039873.4	Neurl2	NEURL2	-1.49	2.67	6.40113e-06	2.61274e-05	1.94	3.42	1.88	1.97	3.49	3.33
ENSMUSG00000011752.7	Pgam1	PGAM1	-1.49	10.54	5.89419e-06	2.45214e-05	9.8	11.29	9.66	9.94	11.28	11.29
ENSMUSG00000022200.8	Golph3	GOLPH3	-1.49	6.64	5.65889e-06	2.38467e-05	5.89	7.38	5.74	6.05	7.38	7.39
ENSMUSG00000003344.14	Btbd2	BTBD2	-1.49	5.24	6.78773e-06	2.72638e-05	4.5	6	4.33	4.67	5.98	6.01
ENSMUSG00000028565.18	Nfia	NFIA	-1.49	1.94	1.12501e-05	3.9165e-05	1.21	2.69	1.16	1.24	2.72	2.66
ENSMUSG00000028207.18	Asph	ASPH	-1.49	7.41	8.24178e-06	3.12179e-05	6.67	8.16	6.5	6.84	8.16	8.16
ENSMUSG00000031202.5	Rab39b	RAB39B	-1.49	-1.34	0.00333523	0.00493218	-1.94	-0.56	-1.78	-2.4	-0.61	-0.59
ENSMUSG00000032796.8	Lama1	LAMA1	-1.49	-2.36	0.00622643	0.00870371	-2.83	-1.54	-3.3	-2.92	-1.67	-1.56
ENSMUSG00000028042.15	Zbtb7b	ZBTB7B	-1.48	5.55	1.53804e-07	3.18351e-06	4.81	6.29	4.79	4.83	6.29	6.29
ENSMUSG00000042364.11	Snx18	SNX18	-1.48	6.55	1.74844e-07	3.30226e-06	5.81	7.29	5.79	5.84	7.28	7.31
ENSMUSG00000027087.11	Itgav	ITGAV	-1.48	6.93	3.05587e-07	4.10046e-06	6.2	7.67	6.15	6.24	7.7	7.64
ENSMUSG00000028041.17	Adam15	ADAM15	-1.48	6.07	3.08287e-07	4.11617e-06	5.33	6.82	5.38	5.28	6.79	6.85
ENSMUSG00000027030.15	Stk39	STK39	-1.48	5.39	3.27259e-07	4.19107e-06	4.65	6.13	4.6	4.71	6.13	6.12
ENSMUSG00000040850.17	Psme4	PSME4	-1.48	7.05	3.96976e-07	4.58852e-06	6.31	7.79	6.25	6.37	7.81	7.76
ENSMUSG00000059439.15	Bcas3	BCAS3	-1.48	3.56	9.68331e-07	7.49606e-06	2.82	4.29	2.78	2.85	4.28	4.31
ENSMUSG00000035847.15	Ids	IDS	-1.48	3.77	1.1406e-06	8.18888e-06	3.04	4.51	3	3.07	4.56	4.46
ENSMUSG00000026674.9	Ddr2	DDR2	-1.48	5.73	1.12116e-06	8.10048e-06	4.99	6.47	4.89	5.1	6.49	6.46
ENSMUSG00000032374.14	Plod2	PLOD2	-1.48	7.36	1.88366e-06	1.12834e-05	6.62	8.1	6.51	6.74	8.12	8.08
ENSMUSG00000047098.18	Rnf31	RNF31	-1.48	4.59	4.1029e-06	1.90428e-05	3.85	5.33	3.99	3.7	5.36	5.3
ENSMUSG00000020914.17	Top2a	TOP2A	-1.48	9.16	5.78406e-06	2.42075e-05	8.43	9.91	8.28	8.57	9.9	9.91
ENSMUSG00000033420.12	Antxr1	ANTXR1	-1.48	4.04	6.54565e-06	2.65419e-05	3.3	4.78	3.14	3.45	4.77	4.78
ENSMUSG00000001525.10	Tubb5	TUBB5	-1.48	10.87	8.5533e-06	3.20883e-05	10.13	11.61	9.98	10.28	11.59	11.63
ENSMUSG00000042286.13	Stab1	STAB1	-1.48	3.23	9.73381e-06	3.5264e-05	2.5	3.97	2.63	2.35	4.03	3.91
ENSMUSG00000040675.17	Mthfd1l	MTHFD1L	-1.48	6.63	8.37186e-06	3.16058e-05	5.88	7.37	5.71	6.06	7.37	7.37
ENSMUSG00000040717.6	Il17rd	IL17RD	-1.48	2.52	1.37433e-05	4.55715e-05	1.8	3.27	1.65	1.92	3.29	3.23
ENSMUSG00000020689.4	Itgb3	ITGB3	-1.48	4.06	1.14307e-05	3.96531e-05	3.32	4.8	3.14	3.5	4.81	4.79
ENSMUSG00000031833.10	Mast3	MAST3	-1.48	4.43	1.11313e-05	3.88697e-05	3.7	5.17	3.88	3.51	5.21	5.14
ENSMUSG00000029999.14	Tgfa	TGFA	-1.48	2.37	1.96157e-05	6.0349e-05	1.64	3.12	1.49	1.76	3.05	3.18
ENSMUSG00000021238.11	Aldh6a1	ALDH6A1	-1.48	3.74	3.14424e-05	8.76313e-05	3	4.48	2.77	3.22	4.49	4.47
ENSMUSG00000020635.8	Fkbp1b	FKBP1B	-1.48	1.39	5.79489e-05	0.000143916	0.67	2.13	0.7	0.6	2.24	2.01
ENSMUSG00000049470.13	Aff4	AFF4	-1.47	7.66	1.99182e-07	3.48202e-06	6.93	8.39	6.91	6.94	8.4	8.39
ENSMUSG00000024038.17	Ndufv3	NDUFV3	-1.47	6.87	2.00515e-07	3.48607e-06	6.13	7.6	6.11	6.16	7.61	7.59
ENSMUSG00000003435.9	Supt5	SUPT5	-1.47	6.87	2.34249e-07	3.71408e-06	6.13	7.61	6.1	6.17	7.59	7.62
ENSMUSG00000049313.8	Sorl1	SORL1	-1.47	5.02	2.40581e-07	3.74554e-06	4.29	5.76	4.27	4.3	5.73	5.79
ENSMUSG00000079111.3	Kdelr2	KDELR2	-1.47	7.43	1.01929e-06	7.7156e-06	6.7	8.16	6.61	6.79	8.16	8.17
ENSMUSG00000034602.15	Mon2	MON2	-1.47	5.82	1.40011e-06	9.32716e-06	5.09	6.56	5.2	4.98	6.55	6.57
ENSMUSG00000025224.16	Gbf1	GBF1	-1.47	4.32	2.48166e-06	1.35799e-05	3.59	5.06	3.71	3.47	5.04	5.08
ENSMUSG00000037331.15	Larp1	LARP1	-1.47	7.11	4.43711e-06	2.00821e-05	6.38	7.85	6.52	6.23	7.83	7.86
ENSMUSG00000091337.3	Eid1	EID1	-1.47	6.89	5.27837e-06	2.26571e-05	6.16	7.63	6.01	6.31	7.62	7.64
ENSMUSG00000019806.13	Aig1	AIG1	-1.47	3.9	9.41816e-06	3.43483e-05	3.17	4.63	3	3.33	4.6	4.66
ENSMUSG00000015882.18	Lcorl	LCORL	-1.46	5.57	1.79362e-07	3.33853e-06	4.85	6.3	4.82	4.87	6.32	6.29
ENSMUSG00000035325.16	Sec31a	SEC31A	-1.46	7.18	2.29889e-07	3.7079e-06	6.45	7.91	6.42	6.48	7.91	7.9
ENSMUSG00000021264.12	Yy1	YY1	-1.46	7.55	2.90728e-07	4.01037e-06	6.83	8.29	6.78	6.87	8.29	8.28
ENSMUSG00000037112.16	Sik2	SIK2	-1.46	4.01	7.57318e-07	6.48157e-06	3.28	4.75	3.27	3.28	4.69	4.79
ENSMUSG00000056692.13	Ilrun	ILRUN	-1.46	6.38	7.01336e-07	6.2141e-06	5.64	7.11	5.56	5.73	7.12	7.1
ENSMUSG00000014907.10	Naf1	NAF1	-1.46	4.4	8.1543e-07	6.7401e-06	3.68	5.13	3.75	3.61	5.12	5.15
ENSMUSG00000042082.7	Arsb	ARSB	-1.46	3.5	1.15546e-06	8.24844e-06	2.78	4.24	2.73	2.81	4.23	4.23
ENSMUSG00000034354.17	Mtmr3	MTMR3	-1.46	6.36	9.74284e-07	7.51322e-06	5.62	7.09	5.53	5.72	7.1	7.08
ENSMUSG00000028434.12	Epb41l4b	EPB41L4B	-1.46	3.53	1.61082e-06	1.01854e-05	2.81	4.26	2.73	2.87	4.25	4.27
ENSMUSG00000029769.16	Ccdc136	CCDC136	-1.46	3.52	1.66615e-06	1.04354e-05	2.8	4.25	2.73	2.84	4.21	4.28
ENSMUSG00000026234.12	Ncl	NCL	-1.46	9.43	1.55839e-06	9.9591e-06	8.7	10.15	8.62	8.77	10.2	10.11
ENSMUSG00000040865.15	Ino80d	INO80D	-1.46	4.95	1.61323e-06	1.01955e-05	4.23	5.68	4.34	4.12	5.7	5.66
ENSMUSG00000031311.17	Nono	NONO	-1.46	8.67	2.4907e-06	1.36235e-05	7.94	9.39	7.82	8.05	9.4	9.39
ENSMUSG00000024528.8	Srfbp1	SRFBP1	-1.45	6.37	1.61889e-07	3.23801e-06	5.65	7.09	5.66	5.64	7.1	7.09
ENSMUSG00000028911.16	Srsf4	SRSF4	-1.45	5.83	1.74946e-07	3.30226e-06	5.1	6.55	5.08	5.12	6.54	6.57
ENSMUSG00000033323.14	Ctdp1	CTDP1	-1.45	5.31	1.87494e-07	3.41897e-06	4.59	6.04	4.61	4.57	6.03	6.04
ENSMUSG00000029416.17	Slc15a4	SLC15A4	-1.45	6.19	2.36033e-07	3.71619e-06	5.46	6.92	5.5	5.42	6.92	6.9
ENSMUSG00000032737.13	Inppl1	INPPL1	-1.45	7.12	3.31274e-07	4.21695e-06	6.4	7.84	6.44	6.35	7.83	7.85
ENSMUSG00000038095.15	Sbno1	SBNO1	-1.45	8.29	3.41592e-07	4.29176e-06	7.56	9.01	7.53	7.6	9.03	8.99
ENSMUSG00000048758.14	Rpl29	RPL29	-1.45	9.84	5.06595e-07	5.23426e-06	9.11	10.57	9.1	9.12	10.55	10.58
ENSMUSG00000023055.10	Calcoco1	CALCOCO1	-1.45	4.78	4.95429e-07	5.19975e-06	4.06	5.5	4	4.12	5.51	5.5
ENSMUSG00000043154.15	Ppp2r3a	PPP2R3A	-1.45	3.8	7.51983e-07	6.46416e-06	3.08	4.52	3.06	3.09	4.54	4.5
ENSMUSG00000038729.23	Akap2	AKAP2	-1.45	5.01	7.3387e-07	6.39857e-06	4.28	5.73	4.25	4.31	5.8	5.66
ENSMUSG00000051177.16	Plcb1	PLCB1	-1.45	3.46	2.04165e-06	1.19197e-05	2.74	4.18	2.66	2.81	4.18	4.18
ENSMUSG00000042772.15	Smg7	SMG7	-1.45	6.19	3.31091e-06	1.6455e-05	5.47	6.92	5.61	5.34	6.91	6.93
ENSMUSG00000090150.10	Acad11	ACAD11	-1.45	3.44	4.7982e-06	2.11971e-05	2.72	4.17	2.6	2.83	4.15	4.18
ENSMUSG00000052459.13	Atp6v1a	ATP6V1A	-1.45	7.99	1.22845e-05	4.18839e-05	7.26	8.71	7.08	7.44	8.7	8.72
ENSMUSG00000025607.15	Copg2	COPG2	-1.45	5.8	1.86911e-05	5.78983e-05	5.08	6.53	4.87	5.27	6.52	6.52
ENSMUSG00000041607.17	Mbp	MBP	-1.45	3.73	3.73673e-05	0.000101225	3	4.46	2.78	3.22	4.41	4.51
ENSMUSG00000025429.9	Pstpip2	PSTPIP2	-1.45	0.15	0.000239526	0.000475269	-0.52	0.9	-0.6	-0.55	0.9	0.85
ENSMUSG00000020891.11	Alox8	ALOX8	-1.45	-1.53	0.00270804	0.0040845	-2.09	-0.76	-2.11	-2.4	-0.8	-0.81
ENSMUSG00000114470.1	Gm49395	GM49395	-1.45	-2.95	0.0786863	0.0922043	-3.21	-2.1	-2.65	-4.7	-2.49	-1.96
ENSMUSG00000064145.12	Arih2	ARIH2	-1.44	6.37	2.01717e-07	3.48607e-06	5.65	7.09	5.62	5.67	7.08	7.1
ENSMUSG00000027327.16	1700037H04Rik	1700037H04RIK	-1.44	5.23	2.55416e-07	3.81575e-06	4.51	5.95	4.51	4.5	5.91	5.98
ENSMUSG00000045763.8	Basp1	BASP1	-1.44	6.7	2.61017e-07	3.84006e-06	5.98	7.42	5.94	6.02	7.43	7.41
ENSMUSG00000057738.13	Sptan1	SPTAN1	-1.44	7.79	2.69216e-07	3.88028e-06	7.07	8.5	7.09	7.05	8.49	8.52
ENSMUSG00000063160.12	Numbl	NUMBL	-1.44	4.87	3.47768e-07	4.32182e-06	4.15	5.59	4.17	4.12	5.62	5.55
ENSMUSG00000037470.14	Uggt1	UGGT1	-1.44	6.85	4.09223e-07	4.66983e-06	6.13	7.57	6.07	6.19	7.57	7.57
ENSMUSG00000027194.16	Ttc17	TTC17	-1.44	4.16	6.18176e-07	5.83186e-06	3.45	4.88	3.4	3.48	4.88	4.89
ENSMUSG00000034903.18	Cobll1	COBLL1	-1.44	3.92	8.76768e-07	7.07042e-06	3.21	4.65	3.25	3.16	4.62	4.67
ENSMUSG00000026821.16	Ralgds	RALGDS	-1.44	4.72	1.10325e-06	8.021e-06	4	5.44	4.05	3.95	5.37	5.5
ENSMUSG00000035011.15	Zbtb7a	ZBTB7A	-1.44	4.71	1.56643e-06	9.98725e-06	4	5.44	4.1	3.89	5.43	5.44
ENSMUSG00000021687.14	Scamp1	SCAMP1	-1.44	5.31	2.24756e-06	1.26857e-05	4.59	6.03	4.46	4.71	6.01	6.05
ENSMUSG00000037049.9	Smpd1	SMPD1	-1.44	5.11	2.78475e-06	1.4676e-05	4.39	5.84	4.27	4.52	5.8	5.87
ENSMUSG00000009681.10	Bcr	BCR	-1.44	5.11	3.20909e-06	1.61083e-05	4.39	5.82	4.52	4.26	5.84	5.81
ENSMUSG00000031328.15	Flna	FLNA	-1.44	10.16	3.7767e-06	1.79397e-05	9.44	10.88	9.32	9.55	10.87	10.88
ENSMUSG00000035569.17	Ankrd11	ANKRD11	-1.44	7.18	5.57132e-06	2.35843e-05	6.46	7.89	6.61	6.31	7.88	7.91
ENSMUSG00000049643.15	2310022A10Rik	2310022A10RIK	-1.44	3.26	9.75834e-06	3.53223e-05	2.54	3.98	2.41	2.67	4.05	3.91
ENSMUSG00000058793.14	Cds2	CDS2	-1.44	5.98	9.11591e-06	3.35872e-05	5.26	6.7	5.09	5.43	6.7	6.7
ENSMUSG00000051550.10	Zfp579	ZFP579	-1.44	2.08	2.81294e-05	8.04135e-05	1.38	2.8	1.44	1.28	2.89	2.69
ENSMUSG00000039834.17	Zfp335	ZFP335	-1.44	4.99	2.3962e-05	7.08539e-05	4.27	5.7	4.48	4.06	5.66	5.75
ENSMUSG00000036091.8	Hyal3	HYAL3	-1.44	-0.82	0.00139166	0.00224539	-1.44	-0.08	-1.37	-1.71	-0.09	-0.12
ENSMUSG00000025885.18	Myo5b	MYO5B	-1.44	-1.44	0.00459703	0.00660156	-2.01	-0.68	-1.84	-2.49	-0.7	-0.75
ENSMUSG00000053552.14	Ebf4	EBF4	-1.44	-2.15	0.00987242	0.013303	-2.62	-1.36	-3.14	-2.58	-1.2	-1.67
ENSMUSG00000096188.1	Cmtm4	CMTM4	-1.43	6.67	2.0401e-07	3.5064e-06	5.96	7.39	5.94	5.98	7.38	7.4
ENSMUSG00000024327.16	Slc39a7	SLC39A7	-1.43	7.42	2.17142e-07	3.66236e-06	6.71	8.14	6.71	6.71	8.15	8.13
ENSMUSG00000063870.12	Chd4	CHD4	-1.43	8.01	2.43929e-07	3.74592e-06	7.29	8.73	7.29	7.3	8.73	8.73
ENSMUSG00000032220.10	Myo1e	MYO1E	-1.43	5.29	3.05805e-07	4.10046e-06	4.58	6.01	4.55	4.61	6.04	5.98
ENSMUSG00000024101.15	Washc1	WASHC1	-1.43	5.36	3.11319e-07	4.11718e-06	4.64	6.07	4.61	4.68	6.05	6.1
ENSMUSG00000042675.15	Ypel3	YPEL3	-1.43	4.89	3.72077e-07	4.44371e-06	4.18	5.6	4.16	4.19	5.64	5.56
ENSMUSG00000036478.8	Btg1	BTG1	-1.43	7.7	3.79098e-07	4.4807e-06	6.99	8.41	6.94	7.03	8.43	8.39
ENSMUSG00000041977.18	Arhgef11	ARHGEF11	-1.43	4.52	5.58762e-07	5.57495e-06	3.81	5.23	3.86	3.76	5.25	5.22
ENSMUSG00000007888.15	Crlf1	CRLF1	-1.43	5.99	5.29245e-07	5.37111e-06	5.28	6.7	5.21	5.34	6.68	6.72
ENSMUSG00000096001.2	2610528A11Rik	2610528A11RIK	-1.43	5.81	1.09236e-06	7.98856e-06	5.1	6.52	5	5.19	6.54	6.5
ENSMUSG00000025959.13	Klf7	KLF7	-1.43	4.42	1.3856e-06	9.25503e-06	3.71	5.13	3.8	3.62	5.12	5.14
ENSMUSG00000033917.15	Gde1	GDE1	-1.43	5.87	1.55227e-06	9.93011e-06	5.15	6.59	5.05	5.26	6.6	6.58
ENSMUSG00000038563.14	Efl1	EFL1	-1.43	4.94	1.99204e-06	1.1679e-05	4.22	5.65	4.12	4.33	5.68	5.62
ENSMUSG00000028703.14	Lrrc41	LRRC41	-1.43	6.33	2.37834e-06	1.31869e-05	5.61	7.04	5.5	5.72	7.09	7
ENSMUSG00000055720.10	Ubl7	UBL7	-1.43	4.18	2.97019e-06	1.53233e-05	3.46	4.9	3.35	3.58	4.89	4.9
ENSMUSG00000024856.10	Cdk2ap2	CDK2AP2	-1.43	5.09	4.36092e-06	1.98229e-05	4.38	5.8	4.23	4.52	5.8	5.81
ENSMUSG00000061536.13	Sec22c	SEC22C	-1.43	2.25	7.73384e-06	2.98886e-05	1.55	2.96	1.52	1.56	2.98	2.95
ENSMUSG00000003154.15	Foxj2	FOXJ2	-1.43	3.45	8.04189e-06	3.06393e-05	2.74	4.17	2.88	2.6	4.16	4.17
ENSMUSG00000024548.11	Setbp1	SETBP1	-1.43	4.11	7.42004e-06	2.90241e-05	3.4	4.83	3.55	3.25	4.79	4.86
ENSMUSG00000020368.15	Canx	CANX	-1.43	9.61	7.95219e-06	3.04329e-05	8.89	10.32	8.75	9.04	10.32	10.31
ENSMUSG00000048997.17	Atxn7l2	ATXN7L2	-1.43	4.63	7.62985e-06	2.96143e-05	3.92	5.34	4.08	3.75	5.35	5.33
ENSMUSG00000046876.16	Atxn1	ATXN1	-1.43	4.06	2.42588e-05	7.15042e-05	3.34	4.77	3.55	3.14	4.75	4.78
ENSMUSG00000054215.2	Sprr2k	SPRR2K	-1.43	1.47	4.70914e-05	0.00012179	0.77	2.2	0.68	0.83	2.12	2.26
ENSMUSG00000031903.7	Pla2g15	PLA2G15	-1.43	3.45	4.19359e-05	0.000110946	2.75	4.17	2.51	2.96	4.15	4.19
ENSMUSG00000022436.16	Sh3bp1	SH3BP1	-1.43	1.89	6.76388e-05	0.000163269	1.19	2.62	1.17	1.18	2.44	2.77
ENSMUSG00000090639.1	Gm20425	GM20425	-1.43	-0.6	0.00687002	0.00953756	-1.22	0.14	-0.79	-1.83	0.18	0.05
ENSMUSG00000043969.4	Emx2	EMX2	-1.43	-2.3	0.00959093	0.0129529	-2.76	-1.5	-3	-3.05	-1.87	-1.29
ENSMUSG00000104713.4	Gbp6	GBP6	-1.43	-1.96	0.0257648	0.032478	-2.46	-1.17	-2.18	-3.19	-1.67	-0.81
ENSMUSG00000036333.11	Kidins220	KIDINS220	-1.42	5.89	1.90335e-07	3.43095e-06	5.17	6.6	5.18	5.17	6.58	6.61
ENSMUSG00000020841.5	Cpd	CPD	-1.42	5.45	1.97796e-07	3.47083e-06	4.75	6.16	4.73	4.76	6.16	6.16
ENSMUSG00000027602.9	Map1lc3a	MAP1LC3A	-1.42	5.18	2.23827e-07	3.6806e-06	4.47	5.89	4.48	4.47	5.88	5.9
ENSMUSG00000037270.18	4932438A13Rik	4932438A13RIK	-1.42	5.03	2.76302e-07	3.93144e-06	4.32	5.73	4.34	4.3	5.75	5.72
ENSMUSG00000028194.15	Ddah1	DDAH1	-1.42	4.82	2.85711e-07	3.99274e-06	4.12	5.53	4.1	4.12	5.54	5.52
ENSMUSG00000039367.11	Sec24c	SEC24C	-1.42	6.74	2.84224e-07	3.98993e-06	6.02	7.45	5.98	6.06	7.44	7.45
ENSMUSG00000021693.20	Kif2a	KIF2A	-1.42	4.66	3.49087e-07	4.32965e-06	3.95	5.37	3.97	3.92	5.36	5.38
ENSMUSG00000048546.8	Tob2	TOB2	-1.42	5.12	4.02101e-07	4.62035e-06	4.41	5.82	4.45	4.36	5.8	5.85
ENSMUSG00000022415.12	Syngr1	SYNGR1	-1.42	5.57	5.95653e-07	5.7347e-06	4.86	6.29	4.92	4.8	6.24	6.33
ENSMUSG00000026819.15	Slc25a25	SLC25A25	-1.42	3.85	8.44606e-07	6.89963e-06	3.15	4.56	3.17	3.12	4.54	4.59
ENSMUSG00000025362.6	Rps26	RPS26	-1.42	9.9	8.96693e-07	7.17769e-06	9.19	10.61	9.14	9.24	10.62	10.61
ENSMUSG00000019302.16	Atp6v0a1	ATP6V0A1	-1.42	4.33	1.01132e-06	7.6868e-06	3.62	5.04	3.6	3.64	4.97	5.1
ENSMUSG00000022350.7	Washc5	WASHC5	-1.42	6.17	1.46552e-06	9.55514e-06	5.46	6.88	5.36	5.56	6.87	6.89
ENSMUSG00000023923.10	Tbc1d5	TBC1D5	-1.42	4.07	2.08985e-06	1.21307e-05	3.37	4.79	3.45	3.28	4.74	4.83
ENSMUSG00000002948.19	Map2k7	MAP2K7	-1.42	5.53	2.55649e-06	1.3861e-05	4.82	6.25	4.94	4.7	6.21	6.28
ENSMUSG00000020048.13	Hsp90b1	HSP90B1	-1.42	9.69	3.3228e-06	1.64984e-05	8.98	10.39	8.87	9.09	10.39	10.4
ENSMUSG00000034290.9	Nek9	NEK9	-1.42	6.65	3.21721e-06	1.61297e-05	5.94	7.36	5.81	6.07	7.35	7.37
ENSMUSG00000031668.14	Eif2ak3	EIF2AK3	-1.42	4.32	4.54895e-06	2.04118e-05	3.62	5.03	3.47	3.74	5.03	5.03
ENSMUSG00000020300.14	Cpeb4	CPEB4	-1.42	2.72	6.44969e-06	2.62841e-05	2.02	3.43	2.07	1.95	3.48	3.37
ENSMUSG00000011267.8	Zfp296	ZFP296	-1.42	2.22	8.41065e-06	3.17141e-05	1.52	2.94	1.54	1.49	2.94	2.93
ENSMUSG00000022324.15	Matn2	MATN2	-1.42	3.67	7.20028e-06	2.84034e-05	2.96	4.38	2.83	3.09	4.34	4.43
ENSMUSG00000006304.14	Arpc2	ARPC2	-1.42	7.47	7.05069e-06	2.80332e-05	6.75	8.18	6.6	6.91	8.2	8.16
ENSMUSG00000041556.8	Fbxo2	FBXO2	-1.42	0	0.000364771	0.000682195	-0.66	0.73	-0.7	-0.73	0.65	0.78
ENSMUSG00000002228.7	Ppm1j	PPM1J	-1.42	0.89	0.000844302	0.00143737	0.21	1.61	0.49	-0.13	1.46	1.74
ENSMUSG00000020882.17	Cacnb1	CACNB1	-1.42	-0.21	0.00109534	0.00181173	-0.86	0.52	-0.73	-1.1	0.65	0.35
ENSMUSG00000030058.17	Copg1	COPG1	-1.41	7.08	2.27517e-07	3.70218e-06	6.38	7.79	6.37	6.38	7.8	7.77
ENSMUSG00000033392.16	Clasp2	CLASP2	-1.41	5.26	2.62972e-07	3.8508e-06	4.56	5.97	4.59	4.53	5.97	5.97
ENSMUSG00000020076.7	Ddx50	DDX50	-1.41	7.11	2.88041e-07	3.99274e-06	6.41	7.81	6.37	6.44	7.81	7.82
ENSMUSG00000026594.14	Ralgps2	RALGPS2	-1.41	5.49	5.70124e-07	5.6039e-06	4.79	6.2	4.72	4.85	6.19	6.2
ENSMUSG00000036550.16	Cnot1	CNOT1	-1.41	7.79	9.15767e-07	7.26369e-06	7.09	8.5	7.01	7.17	8.5	8.49
ENSMUSG00000068739.13	Sars	SARS	-1.41	8.31	1.02397e-06	7.71586e-06	7.61	9.02	7.53	7.69	9.02	9.02
ENSMUSG00000009090.17	Ap1b1	AP1B1	-1.41	5.21	1.13422e-06	8.16172e-06	4.51	5.92	4.42	4.6	5.92	5.92
ENSMUSG00000007655.16	Cav1	CAV1	-1.41	5.86	1.29236e-06	8.84379e-06	5.15	6.56	5.05	5.25	6.56	6.56
ENSMUSG00000033684.14	Qsox1	QSOX1	-1.41	4.79	1.47622e-06	9.59005e-06	4.1	5.5	4	4.19	5.49	5.5
ENSMUSG00000055485.6	Soga1	SOGA1	-1.41	4.81	1.8516e-06	1.1179e-05	4.11	5.52	4.21	4	5.53	5.5
ENSMUSG00000030774.13	Pak1	PAK1	-1.41	4.36	2.25781e-06	1.27264e-05	3.66	5.06	3.57	3.73	5	5.12
ENSMUSG00000042595.7	Fam199x	FAM199X	-1.41	5.57	2.22829e-06	1.2628e-05	4.87	6.27	4.76	4.97	6.31	6.23
ENSMUSG00000023026.16	Dip2b	DIP2B	-1.41	4.91	2.7952e-06	1.47064e-05	4.21	5.62	4.32	4.1	5.66	5.57
ENSMUSG00000034563.16	Ccpg1	CCPG1	-1.41	4.02	3.45846e-06	1.6947e-05	3.32	4.72	3.21	3.43	4.75	4.7
ENSMUSG00000031015.8	Swap70	SWAP70	-1.41	6.78	4.57597e-06	2.05111e-05	6.07	7.48	5.93	6.21	7.49	7.47
ENSMUSG00000039058.11	Ak5	AK5	-1.41	4.68	7.79306e-06	3.00257e-05	3.97	5.38	3.82	4.12	5.42	5.34
ENSMUSG00000034480.18	Diaph2	DIAPH2	-1.41	3.25	1.72795e-05	5.44655e-05	2.55	3.96	2.71	2.39	3.99	3.91
ENSMUSG00000047514.6	Tspyl1	TSPYL1	-1.41	5.83	2.63777e-05	7.64496e-05	5.13	6.54	4.92	5.34	6.53	6.55
ENSMUSG00000031827.13	Cotl1	COTL1	-1.41	5.82	3.22776e-05	8.96608e-05	5.12	6.53	4.9	5.33	6.48	6.57
ENSMUSG00000054191.8	Klf1	KLF1	-1.41	-1.28	0.00237761	0.00363577	-1.86	-0.53	-1.97	-2.01	-0.7	-0.45
ENSMUSG00000045326.13	Fndc7	FNDC7	-1.41	-1.53	0.00753797	0.0103789	-2.07	-0.78	-2.44	-2.01	-0.52	-1.14
ENSMUSG00000014601.13	Strip1	STRIP1	-1.4	5.17	2.43672e-07	3.74592e-06	4.47	5.88	4.47	4.48	5.86	5.89
ENSMUSG00000034614.14	Pik3ip1	PIK3IP1	-1.4	5.06	3.11229e-07	4.11718e-06	4.37	5.77	4.33	4.39	5.77	5.77
ENSMUSG00000025402.12	Nab2	NAB2	-1.4	5.61	3.66417e-07	4.40609e-06	4.91	6.31	4.86	4.96	6.3	6.32
ENSMUSG00000020483.14	Dynll2	DYNLL2	-1.4	5.92	5.39228e-07	5.451e-06	5.21	6.62	5.15	5.28	6.64	6.6
ENSMUSG00000025555.14	Farp1	FARP1	-1.4	5.92	6.05854e-07	5.78433e-06	5.22	6.62	5.29	5.15	6.64	6.61
ENSMUSG00000026721.16	Rabgap1l	RABGAP1L	-1.4	4.97	6.59235e-07	6.05898e-06	4.28	5.67	4.2	4.34	5.68	5.67
ENSMUSG00000025235.8	Bbs4	BBS4	-1.4	3.69	9.64151e-07	7.47291e-06	2.99	4.38	2.98	2.99	4.38	4.39
ENSMUSG00000056917.13	Sipa1	SIPA1	-1.4	3.74	1.05653e-06	7.83144e-06	3.04	4.44	3.06	3	4.42	4.45
ENSMUSG00000026510.10	Trp53bp2	TRP53BP2	-1.4	3.7	1.10398e-06	8.021e-06	3	4.39	2.97	3.03	4.4	4.39
ENSMUSG00000020231.15	Dip2a	DIP2A	-1.4	5.13	1.03636e-06	7.76434e-06	4.43	5.83	4.51	4.34	5.85	5.81
ENSMUSG00000004665.10	Cnn2	CNN2	-1.4	7.29	1.10113e-06	8.02008e-06	6.59	8	6.51	6.68	7.99	8.01
ENSMUSG00000045128.9	Rpl18a	RPL18A	-1.4	10.95	1.40257e-06	9.33364e-06	10.26	11.66	10.21	10.3	11.64	11.67
ENSMUSG00000027820.12	Mme	MME	-1.4	4.23	1.45475e-06	9.51573e-06	3.53	4.93	3.45	3.6	4.95	4.91
ENSMUSG00000024335.20	Brd2	BRD2	-1.4	7.7	1.35839e-06	9.14621e-06	7	8.39	7.09	6.91	8.41	8.38
ENSMUSG00000040943.12	Tet2	TET2	-1.4	5.54	4.18241e-06	1.92765e-05	4.85	6.24	4.98	4.71	6.27	6.21
ENSMUSG00000019790.17	Stxbp5	STXBP5	-1.4	4.65	4.52031e-06	2.03341e-05	3.95	5.34	4.08	3.81	5.35	5.34
ENSMUSG00000021486.7	Prelid1	PRELID1	-1.4	8.24	4.51729e-06	2.03322e-05	7.54	8.93	7.41	7.67	8.94	8.93
ENSMUSG00000047153.4	Khnyn	KHNYN	-1.4	6.04	4.81046e-06	2.12214e-05	5.34	6.73	5.48	5.2	6.71	6.76
ENSMUSG00000039377.7	Hlx	HLX	-1.4	1.98	1.46075e-05	4.78064e-05	1.29	2.68	1.25	1.32	2.66	2.7
ENSMUSG00000031299.10	Pdha1	PDHA1	-1.4	7.56	9.99624e-06	3.59042e-05	6.86	8.26	6.69	7.02	8.26	8.26
ENSMUSG00000016256.10	Ctsz	CTSZ	-1.4	6.64	1.29238e-05	4.35321e-05	5.95	7.35	5.77	6.12	7.33	7.36
ENSMUSG00000026389.16	Steap3	STEAP3	-1.4	2.37	2.38269e-05	7.05631e-05	1.68	3.07	1.53	1.81	3.09	3.04
ENSMUSG00000000594.7	Gm2a	GM2A	-1.4	3.93	2.35225e-05	6.98502e-05	3.22	4.63	3.03	3.42	4.66	4.6
ENSMUSG00000024654.8	Asrgl1	ASRGL1	-1.4	1.98	5.14818e-05	0.00013067	1.29	2.68	1.11	1.45	2.69	2.67
ENSMUSG00000038486.9	Sv2a	SV2A	-1.4	-0.73	0.00145148	0.00233053	-1.33	0	-1.28	-1.56	0.06	-0.12
ENSMUSG00000025372.16	Baiap2	BAIAP2	-1.39	5.79	2.06195e-07	3.53322e-06	5.09	6.48	5.09	5.1	6.49	6.47
ENSMUSG00000030216.12	Wbp11	WBP11	-1.39	5.73	2.13443e-07	3.62881e-06	5.04	6.43	5.04	5.03	6.41	6.44
ENSMUSG00000095115.2	Itpripl2	ITPRIPL2	-1.39	7.18	2.97261e-07	4.06518e-06	6.49	7.88	6.47	6.51	7.85	7.9
ENSMUSG00000053470.13	Kdm3a	KDM3A	-1.39	7.24	3.64217e-07	4.39482e-06	6.55	7.94	6.51	6.59	7.93	7.94
ENSMUSG00000024424.15	Ttc39c	TTC39C	-1.39	4.67	9.8387e-07	7.55427e-06	3.98	5.37	3.9	4.05	5.36	5.37
ENSMUSG00000019907.10	Ppp1r12a	PPP1R12A	-1.39	6.24	9.87206e-07	7.56145e-06	5.54	6.93	5.62	5.46	6.96	6.9
ENSMUSG00000062901.3	Klhl24	KLHL24	-1.39	7.22	1.25175e-06	8.68893e-06	6.53	7.92	6.44	6.62	7.93	7.9
ENSMUSG00000028413.13	B4galt1	B4GALT1	-1.39	7.31	1.30072e-06	8.88268e-06	6.62	8	6.52	6.71	8	8
ENSMUSG00000022433.19	Csnk1e	CSNK1E	-1.39	6.51	1.28563e-06	8.8315e-06	5.81	7.21	5.91	5.72	7.2	7.21
ENSMUSG00000030990.18	Pgap2	PGAP2	-1.39	5.07	3.23147e-06	1.61883e-05	4.38	5.77	4.25	4.5	5.74	5.79
ENSMUSG00000026112.7	Coa5	COA5	-1.39	6.12	3.52732e-06	1.71639e-05	5.43	6.81	5.3	5.56	6.82	6.81
ENSMUSG00000013629.16	Cad	CAD	-1.39	7.82	4.25254e-06	1.94996e-05	7.13	8.52	7.26	7.01	8.49	8.55
ENSMUSG00000031672.8	Got2	GOT2	-1.39	7.8	1.03372e-05	3.68339e-05	7.11	8.5	6.94	7.27	8.49	8.5
ENSMUSG00000021957.7	Tkt	TKT	-1.39	9.11	2.86158e-05	8.15629e-05	8.42	9.8	8.22	8.62	9.8	9.81
ENSMUSG00000022263.10	Trio	TRIO	-1.39	6.37	3.90502e-05	0.000104768	5.68	7.06	5.9	5.45	7.08	7.05
ENSMUSG00000018476.7	Kdm6b	KDM6B	-1.39	3.82	5.86032e-05	0.000145225	3.13	4.51	3.36	2.89	4.46	4.56
ENSMUSG00000054889.10	Dsp	DSP	-1.39	0.22	0.000743909	0.00128545	-0.43	0.92	-0.45	-0.5	1.12	0.7
ENSMUSG00000021010.8	Npas3	NPAS3	-1.39	-2.57	0.0750284	0.0883133	-2.91	-1.78	-4.22	-2.31	-1.58	-2.17
ENSMUSG00000109511.1	Nup62	NUP62	-1.38	6.11	2.61504e-07	3.84274e-06	5.43	6.8	5.4	5.45	6.79	6.82
ENSMUSG00000021843.17	Ktn1	KTN1	-1.38	7.27	5.62123e-07	5.5765e-06	6.57	7.96	6.52	6.63	7.97	7.95
ENSMUSG00000038000.10	Acd	ACD	-1.38	4.43	5.94999e-07	5.7347e-06	3.74	5.12	3.75	3.72	5.15	5.08
ENSMUSG00000021149.8	Gtpbp4	GTPBP4	-1.38	6.99	5.68199e-07	5.5991e-06	6.3	7.67	6.24	6.36	7.67	7.67
ENSMUSG00000030847.8	Bag3	BAG3	-1.38	4.21	7.90927e-07	6.66338e-06	3.53	4.9	3.56	3.48	4.92	4.88
ENSMUSG00000028496.17	Mllt3	MLLT3	-1.38	6.09	7.32092e-07	6.38863e-06	5.41	6.78	5.33	5.48	6.79	6.77
ENSMUSG00000066306.13	Numa1	NUMA1	-1.38	6.99	9.87682e-07	7.56145e-06	6.3	7.68	6.38	6.22	7.68	7.68
ENSMUSG00000010392.8	Gosr1	GOSR1	-1.38	4.93	1.08596e-06	7.95567e-06	4.24	5.62	4.16	4.32	5.64	5.6
ENSMUSG00000032867.8	Fbxw8	FBXW8	-1.38	6.64	1.95488e-06	1.15419e-05	5.96	7.33	5.85	6.06	7.31	7.35
ENSMUSG00000054871.5	Tmem158	TMEM158	-1.38	3.39	2.67491e-06	1.42889e-05	2.71	4.08	2.75	2.66	4.13	4.03
ENSMUSG00000068742.11	Cry2	CRY2	-1.38	3	2.84979e-06	1.49373e-05	2.32	3.7	2.32	2.31	3.71	3.67
ENSMUSG00000071547.4	Nt5dc2	NT5DC2	-1.38	7.89	2.36376e-06	1.31358e-05	7.2	8.58	7.09	7.3	8.58	8.58
ENSMUSG00000039953.13	Clstn1	CLSTN1	-1.38	6.79	2.47462e-06	1.35532e-05	6.11	7.48	5.99	6.22	7.5	7.47
ENSMUSG00000025140.15	Pycr1	PYCR1	-1.38	3.57	3.11018e-06	1.57756e-05	2.89	4.26	2.79	2.97	4.27	4.26
ENSMUSG00000040859.14	Bsdc1	BSDC1	-1.38	4.75	2.76074e-06	1.46169e-05	4.05	5.44	3.94	4.17	5.43	5.45
ENSMUSG00000042507.15	Elmsan1	ELMSAN1	-1.38	4.92	3.75579e-06	1.78606e-05	4.22	5.61	4.35	4.1	5.63	5.58
ENSMUSG00000027642.15	Rpn2	RPN2	-1.38	7.71	9.14868e-06	3.36703e-05	7.02	8.4	6.86	7.18	8.4	8.4
ENSMUSG00000028843.8	Sh3bgrl3	SH3BGRL3	-1.38	5.16	9.6987e-06	3.51672e-05	4.47	5.86	4.3	4.63	5.85	5.85
ENSMUSG00000073096.11	Lrrc61	LRRC61	-1.38	1.07	0.00014232	0.000303815	0.42	1.77	0.42	0.35	1.89	1.63
ENSMUSG00000029478.16	Ncor2	NCOR2	-1.38	4.75	0.000102232	0.000229694	4.06	5.44	4.33	3.79	5.41	5.46
ENSMUSG00000037649.10	H2-DMa	H2-DMA	-1.38	1.39	0.000327023	0.000620465	0.73	2.08	0.97	0.45	2.14	2.02
ENSMUSG00000045467.13	Ttll13	TTLL13	-1.38	-1.74	0.0180082	0.0232295	-2.24	-1	-2.26	-2.58	-0.56	-1.56
ENSMUSG00000039703.15	Nploc4	NPLOC4	-1.37	5.91	2.14644e-07	3.64432e-06	5.22	6.59	5.22	5.22	6.59	6.6
ENSMUSG00000033014.12	Trim33	TRIM33	-1.37	5.97	2.49067e-07	3.78112e-06	5.28	6.65	5.26	5.3	6.64	6.66
ENSMUSG00000032777.9	Gtf3c1	GTF3C1	-1.37	6.95	2.65216e-07	3.86116e-06	6.27	7.63	6.28	6.26	7.63	7.64
ENSMUSG00000030232.18	Aebp2	AEBP2	-1.37	6.51	3.0148e-07	4.08607e-06	5.82	7.2	5.84	5.81	7.22	7.16
ENSMUSG00000041782.14	Lad1	LAD1	-1.37	6.22	3.33001e-07	4.23464e-06	5.54	6.9	5.5	5.57	6.88	6.92
ENSMUSG00000032481.17	Smarcc1	SMARCC1	-1.37	7.08	3.80638e-07	4.49046e-06	6.39	7.76	6.35	6.43	7.77	7.75
ENSMUSG00000022141.7	Nipbl	NIPBL	-1.37	6.15	4.62213e-07	5.01003e-06	5.46	6.83	5.45	5.48	6.88	6.78
ENSMUSG00000033083.16	Tbc1d4	TBC1D4	-1.37	4.46	5.35051e-07	5.42128e-06	3.78	5.14	3.75	3.81	5.14	5.15
ENSMUSG00000033161.10	Atp1a1	ATP1A1	-1.37	7.82	1.01393e-06	7.6965e-06	7.13	8.5	7.05	7.21	8.51	8.5
ENSMUSG00000026915.16	Strbp	STRBP	-1.37	5.92	1.68492e-06	1.05006e-05	5.24	6.61	5.15	5.33	6.65	6.56
ENSMUSG00000031320.9	Rps4x	RPS4X	-1.37	10.8	3.52269e-06	1.71542e-05	10.12	11.49	10.03	10.21	11.47	11.51
ENSMUSG00000037242.8	Clic4	CLIC4	-1.37	8.06	1.13408e-05	3.94421e-05	7.38	8.75	7.21	7.54	8.74	8.76
ENSMUSG00000040875.12	Osbpl10	OSBPL10	-1.37	1.83	1.96168e-05	6.0349e-05	1.17	2.52	1.14	1.16	2.54	2.5
ENSMUSG00000091811.2	Inafm1	INAFM1	-1.37	3.07	2.60626e-05	7.57462e-05	2.39	3.75	2.56	2.21	3.77	3.73
ENSMUSG00000039395.8	Mreg	MREG	-1.37	3.02	3.58672e-05	9.79429e-05	2.34	3.7	2.19	2.47	3.59	3.82
ENSMUSG00000001794.13	Capns1	CAPNS1	-1.37	6.99	3.17412e-05	8.83661e-05	6.3	7.67	6.1	6.51	7.67	7.68
ENSMUSG00000051331.15	Cacna1c	CACNA1C	-1.37	2.34	7.53572e-05	0.000178336	1.67	3.03	1.87	1.46	3.06	3
ENSMUSG00000089774.2	Slc5a3	SLC5A3	-1.36	5.73	2.25601e-07	3.69069e-06	5.05	6.42	5.05	5.05	6.41	6.42
ENSMUSG00000038773.11	Kdm3b	KDM3B	-1.36	5.66	2.87174e-07	3.99274e-06	4.98	6.34	5	4.96	6.32	6.36
ENSMUSG00000029191.16	Rfc1	RFC1	-1.36	6.73	3.35136e-07	4.24889e-06	6.05	7.42	6.02	6.08	7.42	7.41
ENSMUSG00000024858.14	Grk2	GRK2	-1.36	5.43	3.53741e-07	4.35351e-06	4.75	6.11	4.72	4.78	6.08	6.14
ENSMUSG00000030835.6	Nomo1	NOMO1	-1.36	6.78	4.3318e-07	4.81209e-06	6.11	7.46	6.06	6.15	7.48	7.45
ENSMUSG00000026622.15	Nek2	NEK2	-1.36	5.66	4.50863e-07	4.94353e-06	4.98	6.34	4.94	5.02	6.37	6.3
ENSMUSG00000040990.17	Sh3kbp1	SH3KBP1	-1.36	4.59	5.54699e-07	5.55318e-06	3.91	5.27	3.87	3.94	5.28	5.25
ENSMUSG00000046731.4	Kctd11	KCTD11	-1.36	5.56	6.05872e-07	5.78433e-06	4.88	6.24	4.83	4.93	6.2	6.28
ENSMUSG00000042323.17	Pbrm1	PBRM1	-1.36	6.8	1.29027e-06	8.83907e-06	6.12	7.49	6.04	6.21	7.48	7.49
ENSMUSG00000031557.16	Plekha2	PLEKHA2	-1.36	7.95	1.99946e-06	1.17143e-05	7.27	8.63	7.17	7.37	8.63	8.63
ENSMUSG00000068699.12	Flnc	FLNC	-1.36	7.18	1.9715e-06	1.15856e-05	6.51	7.87	6.61	6.41	7.85	7.88
ENSMUSG00000041440.18	Gk5	GK5	-1.36	3.07	2.93817e-06	1.52222e-05	2.4	3.75	2.38	2.4	3.73	3.77
ENSMUSG00000029185.14	Fam114a1	FAM114A1	-1.36	5.51	2.87346e-06	1.50194e-05	4.83	6.19	4.71	4.95	6.2	6.18
ENSMUSG00000026944.18	Abca2	ABCA2	-1.36	4.34	3.35846e-06	1.66125e-05	3.66	5.02	3.77	3.55	5.02	5.02
ENSMUSG00000031103.12	Elf4	ELF4	-1.36	3.91	4.50657e-06	2.03061e-05	3.24	4.6	3.35	3.12	4.58	4.61
ENSMUSG00000050022.16	Amz1	AMZ1	-1.36	1.56	3.141e-05	8.75604e-05	0.9	2.25	0.87	0.9	2.24	2.25
ENSMUSG00000055538.7	Zcchc24	ZCCHC24	-1.36	5.17	1.90135e-05	5.87376e-05	4.49	5.86	4.3	4.68	5.86	5.85
ENSMUSG00000001419.17	Mef2d	MEF2D	-1.36	4.86	2.52891e-05	7.40117e-05	4.18	5.54	4.38	3.98	5.55	5.52
ENSMUSG00000041115.16	Iqsec2	IQSEC2	-1.36	1.01	0.000384677	0.000714741	0.36	1.69	0.57	0.09	1.64	1.73
ENSMUSG00000029561.17	Oasl2	OASL2	-1.36	-0.1	0.00130468	0.00211755	-0.72	0.6	-0.79	-0.78	0.36	0.82
ENSMUSG00000020580.10	Rock2	ROCK2	-1.35	6.55	2.92012e-07	4.01037e-06	5.88	7.22	5.86	5.89	7.24	7.21
ENSMUSG00000028821.8	Syf2	SYF2	-1.35	5.67	3.0879e-07	4.11718e-06	5	6.34	4.97	5.03	6.35	6.34
ENSMUSG00000023805.17	Synj2	SYNJ2	-1.35	4.74	3.87153e-07	4.52498e-06	4.07	5.42	4.07	4.07	5.42	5.42
ENSMUSG00000004056.15	Akt2	AKT2	-1.35	6.68	5.67294e-07	5.59854e-06	6	7.36	5.95	6.06	7.34	7.38
ENSMUSG00000020114.12	Cand1	CAND1	-1.35	7.79	9.05663e-07	7.21622e-06	7.12	8.46	7.05	7.18	8.46	8.47
ENSMUSG00000053128.15	Rnf26	RNF26	-1.35	4.59	1.05159e-06	7.80863e-06	3.92	5.27	3.95	3.89	5.21	5.32
ENSMUSG00000028161.17	Ppp3ca	PPP3CA	-1.35	6.26	1.36472e-06	9.1692e-06	5.58	6.94	5.49	5.68	6.95	6.93
ENSMUSG00000033792.12	Atp7a	ATP7A	-1.35	4.4	1.53351e-06	9.87529e-06	3.72	5.07	3.65	3.8	5.09	5.05
ENSMUSG00000031431.13	Tsc22d3	TSC22D3	-1.35	5.14	2.20314e-06	1.2542e-05	4.46	5.82	4.37	4.56	5.77	5.87
ENSMUSG00000000959.7	Oxa1l	OXA1L	-1.35	5.43	2.18944e-06	1.2481e-05	4.76	6.1	4.65	4.86	6.12	6.08
ENSMUSG00000039801.7	Cplane1	CPLANE1	-1.35	5.25	2.54101e-06	1.37957e-05	4.58	5.93	4.69	4.46	5.94	5.92
ENSMUSG00000022420.16	Dnal4	DNAL4	-1.35	4.32	4.1977e-06	1.93328e-05	3.64	4.99	3.53	3.76	4.97	5.02
ENSMUSG00000078302.5	Foxd1	FOXD1	-1.35	2.97	5.13041e-06	2.22353e-05	2.3	3.65	2.31	2.29	3.71	3.59
ENSMUSG00000031765.8	Mt1	MT1	-1.35	8.11	5.16455e-06	2.23159e-05	7.43	8.78	7.31	7.56	8.76	8.8
ENSMUSG00000037852.8	Cpe	CPE	-1.35	7.86	6.99569e-06	2.78409e-05	7.19	8.53	7.04	7.32	8.52	8.54
ENSMUSG00000018425.18	Dhx40	DHX40	-1.35	6.71	9.58173e-06	3.48437e-05	6.04	7.38	5.88	6.19	7.4	7.36
ENSMUSG00000042605.16	Atxn2	ATXN2	-1.35	5.72	1.47555e-05	4.82027e-05	5.04	6.39	5.22	4.86	6.41	6.38
ENSMUSG00000002028.13	Kmt2a	KMT2A	-1.35	5.03	9.32452e-05	0.000212735	4.36	5.7	4.61	4.1	5.73	5.67
ENSMUSG00000026649.14	Cfap126	CFAP126	-1.35	-1.19	0.0123926	0.0164414	-1.73	-0.47	-2.35	-1.37	-0.32	-0.69
ENSMUSG00000040857.15	Erf	ERF	-1.34	6.67	2.97927e-07	4.06518e-06	6	7.35	6.01	5.99	7.36	7.33
ENSMUSG00000026667.14	Uhmk1	UHMK1	-1.34	5.99	3.66945e-07	4.40609e-06	5.32	6.66	5.35	5.29	6.64	6.69
ENSMUSG00000044847.13	Lsm11	LSM11	-1.34	5.02	4.12954e-07	4.68686e-06	4.35	5.69	4.32	4.38	5.7	5.67
ENSMUSG00000018846.8	Pank3	PANK3	-1.34	6.95	7.65231e-07	6.52706e-06	6.28	7.62	6.21	6.34	7.64	7.6
ENSMUSG00000021196.14	Pfkp	PFKP	-1.34	6.6	9.22824e-07	7.28956e-06	5.94	7.28	5.86	6.01	7.27	7.28
ENSMUSG00000001418.13	Glmp	GLMP	-1.34	6.12	1.43318e-06	9.45329e-06	5.45	6.8	5.36	5.54	6.78	6.81
ENSMUSG00000039982.8	Dtx4	DTX4	-1.34	5.4	1.49638e-06	9.70603e-06	4.73	6.07	4.64	4.82	6.07	6.07
ENSMUSG00000060798.7	Intu	INTU	-1.34	3.49	1.95963e-06	1.1559e-05	2.83	4.16	2.85	2.79	4.18	4.14
ENSMUSG00000032387.15	Rbpms2	RBPMS2	-1.34	3.63	2.3026e-06	1.29041e-05	2.97	4.3	3.01	2.91	4.34	4.27
ENSMUSG00000031004.8	Mki67	MKI67	-1.34	6.27	2.07515e-06	1.20928e-05	5.6	6.93	5.7	5.49	6.93	6.93
ENSMUSG00000003458.12	Ncstn	NCSTN	-1.34	5.68	2.09033e-06	1.21307e-05	5.01	6.35	4.91	5.11	6.34	6.36
ENSMUSG00000001911.16	Nfix	NFIX	-1.34	5.18	2.75004e-06	1.45848e-05	4.51	5.85	4.62	4.39	5.85	5.85
ENSMUSG00000031447.7	Lamp1	LAMP1	-1.34	9.12	3.5105e-06	1.71152e-05	8.45	9.79	8.34	8.55	9.79	9.79
ENSMUSG00000026880.11	Stom	STOM	-1.34	6.54	3.23779e-06	1.6207e-05	5.87	7.21	5.75	5.98	7.23	7.19
ENSMUSG00000042035.11	Igsf3	IGSF3	-1.34	4.4	3.65968e-06	1.75967e-05	3.73	5.07	3.62	3.84	5.1	5.04
ENSMUSG00000052928.9	Ctif	CTIF	-1.34	2.77	5.84406e-06	2.43936e-05	2.1	3.45	2.09	2.1	3.49	3.39
ENSMUSG00000052397.8	Ezr	EZR	-1.34	7.71	1.48087e-05	4.83514e-05	7.04	8.38	6.87	7.2	8.36	8.4
ENSMUSG00000042359.18	Osbpl6	OSBPL6	-1.34	1.32	0.000163776	0.000342719	0.67	2	0.76	0.53	1.87	2.11
ENSMUSG00000025738.8	Fbxl16	FBXL16	-1.34	0.24	0.000670371	0.00117094	-0.39	0.92	-0.25	-0.62	0.84	0.98
ENSMUSG00000031543.18	Ank1	ANK1	-1.34	-0.31	0.000902255	0.00152406	-0.9	0.38	-0.88	-1.06	0.43	0.29
ENSMUSG00000103144.1	Pcdhga1	PCDHGA1	-1.34	-0.62	0.00398163	0.00579465	-1.2	0.08	-1.64	-0.93	0.08	0.02
ENSMUSG00000029528.19	Pxn	PXN	-1.33	6.38	2.67882e-07	3.87304e-06	5.71	7.04	5.7	5.72	7.04	7.05
ENSMUSG00000075702.9	Selenom	SELENOM	-1.33	5.06	3.62663e-07	4.38877e-06	4.4	5.72	4.41	4.39	5.73	5.71
ENSMUSG00000037966.15	Ninj1	NINJ1	-1.33	5.97	4.71185e-07	5.05981e-06	5.31	6.63	5.28	5.34	6.6	6.67
ENSMUSG00000037353.9	Letmd1	LETMD1	-1.33	4.87	4.93722e-07	5.19961e-06	4.21	5.54	4.17	4.24	5.54	5.53
ENSMUSG00000019256.17	Ahr	AHR	-1.33	4.81	6.53488e-07	6.01496e-06	4.14	5.47	4.19	4.1	5.49	5.45
ENSMUSG00000021709.14	Erbin	ERBIN	-1.33	7.75	8.19961e-07	6.76428e-06	7.08	8.41	7.02	7.14	8.42	8.41
ENSMUSG00000020919.11	Stat5b	STAT5B	-1.33	4.26	1.44783e-06	9.50237e-06	3.6	4.93	3.54	3.66	4.95	4.9
ENSMUSG00000031393.16	Mecp2	MECP2	-1.33	4.92	1.52469e-06	9.83882e-06	4.26	5.58	4.34	4.17	5.61	5.56
ENSMUSG00000015474.16	Ppt2	PPT2	-1.33	3.95	1.89567e-06	1.13239e-05	3.29	4.62	3.35	3.23	4.64	4.59
ENSMUSG00000038324.13	Trpc4ap	TRPC4AP	-1.33	6.61	1.71185e-06	1.05845e-05	5.95	7.28	5.85	6.04	7.27	7.28
ENSMUSG00000019818.15	Cd164	CD164	-1.33	7.75	2.13721e-06	1.22948e-05	7.1	8.41	6.99	7.19	8.41	8.42
ENSMUSG00000030557.17	Mef2a	MEF2A	-1.33	5.27	2.16663e-06	1.2396e-05	4.61	5.94	4.51	4.71	5.97	5.91
ENSMUSG00000048058.17	Ldlrad3	LDLRAD3	-1.33	5.41	5.00711e-06	2.18132e-05	4.75	6.08	4.61	4.88	6.07	6.08
ENSMUSG00000057963.9	Itpk1	ITPK1	-1.33	4.46	7.58599e-06	2.94896e-05	3.8	5.12	3.65	3.93	5.12	5.13
ENSMUSG00000039159.16	Ube2h	UBE2H	-1.33	6.08	9.6716e-06	3.50892e-05	5.41	6.74	5.27	5.56	6.79	6.69
ENSMUSG00000102748.1	Pcdhgb2	PCDHGB2	-1.33	3.66	1.29289e-05	4.35377e-05	3	4.32	2.87	3.12	4.39	4.25
ENSMUSG00000002496.10	Tsc2	TSC2	-1.33	5.47	1.77691e-05	5.56041e-05	4.8	6.13	4.98	4.62	6.13	6.14
ENSMUSG00000037032.16	Apbb1	APBB1	-1.33	5.22	2.0638e-05	6.2738e-05	4.56	5.89	4.37	4.74	5.85	5.92
ENSMUSG00000039512.12	Uhrf1bp1	UHRF1BP1	-1.33	4.67	2.45121e-05	7.20396e-05	4	5.34	4.19	3.82	5.29	5.38
ENSMUSG00000031227.8	Magee1	MAGEE1	-1.33	0.42	0.00231555	0.00354831	-0.21	1.1	-0.62	0.12	1.01	1.17
ENSMUSG00000027230.9	Creb3l1	CREB3L1	-1.33	-0.8	0.00431206	0.00623079	-1.37	-0.09	-1.33	-1.61	-0.4	0.15
ENSMUSG00000033949.12	Trim36	TRIM36	-1.33	-1.52	0.0125181	0.0165921	-2.04	-0.8	-2.44	-1.95	-1.2	-0.49
ENSMUSG00000022139.17	Mbnl2	MBNL2	-1.32	6.43	3.10404e-07	4.11718e-06	5.77	7.08	5.79	5.75	7.09	7.08
ENSMUSG00000033589.4	Reep4	REEP4	-1.32	5.61	3.16212e-07	4.11718e-06	4.95	6.27	4.93	4.96	6.28	6.26
ENSMUSG00000032228.16	Tcf12	TCF12	-1.32	6.67	3.64626e-07	4.39482e-06	6.01	7.33	6.02	5.99	7.35	7.31
ENSMUSG00000038520.15	Tbc1d17	TBC1D17	-1.32	5.33	3.90988e-07	4.55485e-06	4.67	6	4.71	4.64	6	5.99
ENSMUSG00000026083.12	Eif5b	EIF5B	-1.32	5.81	3.95067e-07	4.57899e-06	5.14	6.47	5.11	5.18	6.48	6.45
ENSMUSG00000029581.14	Fscn1	FSCN1	-1.32	8.09	4.6352e-07	5.01176e-06	7.44	8.75	7.44	7.42	8.74	8.77
ENSMUSG00000025019.17	Lcor	LCOR	-1.32	4.93	7.00074e-07	6.21167e-06	4.28	5.6	4.32	4.23	5.57	5.61
ENSMUSG00000031161.15	Hdac6	HDAC6	-1.32	5.31	6.94415e-07	6.1833e-06	4.65	5.97	4.59	4.71	5.97	5.98
ENSMUSG00000016933.17	Plcg1	PLCG1	-1.32	7.01	8.67814e-07	7.0298e-06	6.36	7.68	6.42	6.29	7.67	7.69
ENSMUSG00000038119.15	Cdon	CDON	-1.32	4.39	1.23793e-06	8.64554e-06	3.74	5.05	3.74	3.72	4.99	5.11
ENSMUSG00000021262.15	Evl	EVL	-1.32	5.01	1.25381e-06	8.69459e-06	4.35	5.68	4.31	4.39	5.74	5.6
ENSMUSG00000039239.14	Tgfb2	TGFB2	-1.32	3.46	2.44983e-06	1.34644e-05	2.8	4.12	2.75	2.84	4.11	4.12
ENSMUSG00000002778.14	Kdelr1	KDELR1	-1.32	6.14	2.94672e-06	1.52482e-05	5.49	6.8	5.38	5.6	6.81	6.79
ENSMUSG00000030824.17	Nucb1	NUCB1	-1.32	6.62	3.45005e-06	1.69259e-05	5.96	7.28	5.84	6.07	7.27	7.29
ENSMUSG00000047888.10	Tnrc6b	TNRC6B	-1.32	5.28	4.0574e-06	1.88792e-05	4.62	5.95	4.74	4.51	5.99	5.9
ENSMUSG00000032870.8	Smap2	SMAP2	-1.32	2.98	6.02805e-06	2.49215e-05	2.32	3.64	2.35	2.29	3.58	3.69
ENSMUSG00000011837.4	Snapc2	SNAPC2	-1.32	4.62	1.71621e-05	5.41906e-05	3.96	5.29	3.79	4.14	5.29	5.28
ENSMUSG00000028809.16	Srrm1	SRRM1	-1.32	6.1	1.85937e-05	5.76534e-05	5.45	6.76	5.62	5.27	6.77	6.75
ENSMUSG00000039852.17	Rere	RERE	-1.32	5.35	2.39028e-05	7.07455e-05	4.69	6.01	4.88	4.5	6.04	5.98
ENSMUSG00000027244.14	Atg13	ATG13	-1.32	3.19	4.86869e-05	0.000125067	2.54	3.86	2.33	2.73	3.84	3.86
ENSMUSG00000028799.15	Zfp362	ZFP362	-1.32	1.32	0.000220652	0.000443139	0.68	1.98	0.86	0.46	1.95	2.01
ENSMUSG00000044548.11	Dact1	DACT1	-1.32	-0.24	0.00101762	0.00169681	-0.83	0.44	-0.95	-0.84	0.55	0.29
ENSMUSG00000037321.17	Tap1	TAP1	-1.32	-1.64	0.00864114	0.0117663	-2.14	-0.92	-2.53	-2.08	-1.2	-0.75
ENSMUSG00000037933.16	Bicd2	BICD2	-1.31	6.18	3.39646e-07	4.27586e-06	5.53	6.84	5.52	5.53	6.81	6.86
ENSMUSG00000034269.12	Setd5	SETD5	-1.31	7.71	6.21584e-07	5.84987e-06	7.05	8.37	7.1	7.01	8.38	8.36
ENSMUSG00000017837.12	Nkiras2	NKIRAS2	-1.31	5.37	1.01284e-06	7.6937e-06	4.71	6.03	4.65	4.78	6.05	6
ENSMUSG00000030410.16	Dmwd	DMWD	-1.31	5.37	1.08193e-06	7.94007e-06	4.71	6.03	4.78	4.64	6.05	6
ENSMUSG00000028348.7	Cavin4	CAVIN4	-1.31	4.1	1.35417e-06	9.13482e-06	3.45	4.76	3.43	3.46	4.72	4.8
ENSMUSG00000030602.13	Pak4	PAK4	-1.31	5.05	1.40457e-06	9.34201e-06	4.39	5.7	4.31	4.47	5.71	5.69
ENSMUSG00000017009.3	Sdc4	SDC4	-1.31	8.77	2.50666e-06	1.36751e-05	8.11	9.43	8.03	8.2	9.42	9.43
ENSMUSG00000037652.15	Phc3	PHC3	-1.31	4.73	2.85507e-06	1.49588e-05	4.08	5.38	4.18	3.98	5.38	5.39
ENSMUSG00000093989.1	Rnasek	RNASEK	-1.31	4.32	3.61704e-06	1.74384e-05	3.66	4.97	3.56	3.77	4.99	4.96
ENSMUSG00000041936.18	Agrn	AGRN	-1.31	7.06	4.72043e-06	2.09644e-05	6.41	7.71	6.53	6.28	7.72	7.7
ENSMUSG00000055320.17	Tead1	TEAD1	-1.31	4.07	8.56582e-05	0.000198498	3.42	4.72	3.64	3.19	4.81	4.64
ENSMUSG00000063450.14	Syne2	SYNE2	-1.31	6.51	8.94577e-05	0.0002057	5.86	7.17	6.1	5.61	7.16	7.17
ENSMUSG00000024998.17	Plce1	PLCE1	-1.31	0.37	0.000430024	0.000789079	-0.24	1.03	-0.34	-0.24	1.13	0.91
ENSMUSG00000029359.13	Tesc	TESC	-1.31	0.53	0.000493188	0.000890289	-0.09	1.21	0.03	-0.28	1.09	1.28
ENSMUSG00000017167.6	Cntnap1	CNTNAP1	-1.31	2.7	0.000326029	0.000618766	2.06	3.36	2.35	1.75	3.38	3.33
ENSMUSG00000066842.18	Hmcn1	HMCN1	-1.31	0.22	0.0010498	0.00174443	-0.38	0.88	-0.31	-0.55	1.05	0.68
ENSMUSG00000034330.10	Plcg2	PLCG2	-1.31	-1.04	0.00271916	0.00409881	-1.59	-0.35	-1.84	-1.56	-0.32	-0.45
ENSMUSG00000007097.14	Atp1a2	ATP1A2	-1.31	-1.76	0.00493692	0.00704218	-2.24	-1.04	-2.44	-2.4	-1.14	-1.07
ENSMUSG00000020099.8	Unc5b	UNC5B	-1.3	6.2	3.77642e-07	4.4677e-06	5.54	6.85	5.57	5.51	6.86	6.84
ENSMUSG00000048285.9	Frmd6	FRMD6	-1.3	5.63	4.82711e-07	5.11796e-06	4.99	6.29	4.94	5.03	6.29	6.29
ENSMUSG00000071076.6	Jund	JUND	-1.3	6.36	5.92882e-07	5.72998e-06	5.71	7.01	5.76	5.67	7	7.02
ENSMUSG00000026142.15	Rhbdd1	RHBDD1	-1.3	4.94	7.7494e-07	6.58751e-06	4.29	5.59	4.27	4.3	5.54	5.64
ENSMUSG00000031642.9	Sh3rf1	SH3RF1	-1.3	4.53	8.65001e-07	7.01606e-06	3.88	5.18	3.85	3.91	5.15	5.2
ENSMUSG00000031095.15	Cul4b	CUL4B	-1.3	6.87	9.41245e-07	7.37729e-06	6.22	7.53	6.16	6.29	7.53	7.52
ENSMUSG00000028669.15	Pithd1	PITHD1	-1.3	4.91	1.01459e-06	7.6965e-06	4.27	5.56	4.2	4.33	5.56	5.57
ENSMUSG00000035891.16	Cerk	CERK	-1.3	4.82	1.07623e-06	7.91206e-06	4.18	5.47	4.1	4.23	5.47	5.47
ENSMUSG00000038398.8	Upf3a	UPF3A	-1.3	4.95	1.08981e-06	7.97922e-06	4.31	5.61	4.24	4.37	5.58	5.63
ENSMUSG00000025007.13	Aldh18a1	ALDH18A1	-1.3	6.53	1.43795e-06	9.46875e-06	5.88	7.17	5.79	5.96	7.17	7.18
ENSMUSG00000037214.12	Thap1	THAP1	-1.3	4.29	1.71439e-06	1.05898e-05	3.65	4.95	3.58	3.71	4.95	4.94
ENSMUSG00000032536.11	Trak1	TRAK1	-1.3	4.94	3.25395e-06	1.62556e-05	4.29	5.6	4.4	4.19	5.62	5.57
ENSMUSG00000069769.13	Msi2	MSI2	-1.3	6.16	3.88092e-06	1.82895e-05	5.52	6.8	5.4	5.62	6.83	6.78
ENSMUSG00000044533.15	Rps2	RPS2	-1.3	11.96	5.05355e-06	2.19698e-05	11.31	12.61	11.23	11.39	12.6	12.61
ENSMUSG00000039781.14	Cep131	CEP131	-1.3	3.57	5.51314e-06	2.33853e-05	2.92	4.22	3.01	2.83	4.19	4.24
ENSMUSG00000025782.12	Taf3	TAF3	-1.3	3.24	5.79658e-06	2.42357e-05	2.59	3.9	2.5	2.67	3.9	3.89
ENSMUSG00000034723.11	Tmx4	TMX4	-1.3	4.83	4.89508e-06	2.14457e-05	4.18	5.48	4.06	4.31	5.49	5.47
ENSMUSG00000027109.16	Sp3	SP3	-1.3	7.11	5.43504e-06	2.31008e-05	6.46	7.76	6.34	6.59	7.79	7.73
ENSMUSG00000002910.11	Arrdc2	ARRDC2	-1.3	3.47	8.36818e-06	3.16014e-05	2.82	4.12	2.92	2.71	4.08	4.15
ENSMUSG00000031217.8	Efnb1	EFNB1	-1.3	3.19	9.98554e-06	3.5876e-05	2.55	3.84	2.43	2.65	3.83	3.86
ENSMUSG00000044252.18	Osbpl1a	OSBPL1A	-1.3	4.38	1.37495e-05	4.55802e-05	3.73	5.03	3.57	3.89	5.03	5.03
ENSMUSG00000044320.14	1700001O22Rik	1700001O22RIK	-1.3	-1.08	0.0275955	0.0346432	-1.6	-0.4	-1.05	-2.4	-0.29	-0.59
ENSMUSG00000002319.16	Ipo4	IPO4	-1.29	6.33	3.2127e-07	4.16954e-06	5.69	6.98	5.68	5.69	6.98	6.98
ENSMUSG00000056952.13	Tatdn2	TATDN2	-1.29	6.78	3.6197e-07	4.38877e-06	6.13	7.42	6.14	6.13	7.42	7.42
ENSMUSG00000027330.16	Cdc25b	CDC25B	-1.29	5.32	3.86836e-07	4.52498e-06	4.68	5.96	4.68	4.68	5.98	5.95
ENSMUSG00000003031.14	Cdkn1b	CDKN1B	-1.29	7.7	4.55383e-07	4.97883e-06	7.05	8.34	7.07	7.04	8.33	8.35
ENSMUSG00000027598.16	Itch	ITCH	-1.29	6.14	4.56115e-07	4.97883e-06	5.5	6.79	5.46	5.53	6.8	6.77
ENSMUSG00000047412.16	Zbtb44	ZBTB44	-1.29	4.81	5.07066e-07	5.23482e-06	4.17	5.46	4.16	4.18	5.46	5.45
ENSMUSG00000024104.11	Washc2	WASHC2	-1.29	6.56	5.75371e-07	5.63003e-06	5.92	7.21	5.86	5.96	7.2	7.21
ENSMUSG00000030327.8	Necap1	NECAP1	-1.29	5.68	5.87559e-07	5.70437e-06	5.04	6.33	5.03	5.05	6.37	6.28
ENSMUSG00000002365.10	Snx9	SNX9	-1.29	5.91	5.91387e-07	5.72434e-06	5.27	6.55	5.23	5.31	6.58	6.53
ENSMUSG00000040043.16	Rbms2	RBMS2	-1.29	5.73	6.08206e-07	5.79709e-06	5.08	6.37	5.04	5.12	6.4	6.34
ENSMUSG00000070056.6	Mfhas1	MFHAS1	-1.29	4.48	1.02515e-06	7.71586e-06	3.84	5.13	3.89	3.79	5.13	5.13
ENSMUSG00000004897.16	Hdgf	HDGF	-1.29	8.52	1.54474e-06	9.9021e-06	7.88	9.16	7.81	7.94	9.16	9.17
ENSMUSG00000032194.9	Kank2	KANK2	-1.29	5.69	1.81353e-06	1.10127e-05	5.05	6.34	4.96	5.13	6.37	6.3
ENSMUSG00000038759.15	Nup205	NUP205	-1.29	7.67	1.8787e-06	1.12776e-05	7.03	8.32	6.94	7.11	8.32	8.31
ENSMUSG00000030105.8	Arl8b	ARL8B	-1.29	7.2	1.92406e-06	1.14298e-05	6.55	7.84	6.47	6.64	7.85	7.84
ENSMUSG00000032418.15	Me1	ME1	-1.29	5.34	2.60958e-06	1.40595e-05	4.7	5.99	4.59	4.8	5.98	5.99
ENSMUSG00000047454.12	Gphn	GPHN	-1.29	4.88	3.20827e-06	1.61083e-05	4.23	5.53	4.12	4.34	5.52	5.53
ENSMUSG00000047264.8	Zfp358	ZFP358	-1.29	4.21	3.56896e-06	1.72995e-05	3.56	4.86	3.48	3.65	4.81	4.91
ENSMUSG00000047284.14	Neurl4	NEURL4	-1.29	5.46	3.69994e-06	1.76959e-05	4.81	6.11	4.93	4.7	6.12	6.1
ENSMUSG00000057637.13	Prdm2	PRDM2	-1.29	4.72	4.23828e-06	1.9484e-05	4.08	5.37	4.19	3.97	5.38	5.35
ENSMUSG00000041757.16	Plekha6	PLEKHA6	-1.29	4.05	5.28553e-06	2.26721e-05	3.41	4.7	3.5	3.31	4.64	4.74
ENSMUSG00000031586.17	Rbpms	RBPMS	-1.29	4.14	5.37852e-06	2.29537e-05	3.5	4.79	3.4	3.59	4.84	4.73
ENSMUSG00000027184.14	Caprin1	CAPRIN1	-1.29	9.28	7.47666e-06	2.91729e-05	8.64	9.93	8.52	8.76	9.94	9.92
ENSMUSG00000021752.13	Kctd6	KCTD6	-1.29	3.76	8.55008e-06	3.20883e-05	3.12	4.41	3.24	3	4.4	4.42
ENSMUSG00000027349.5	Fam98b	FAM98B	-1.29	2.94	1.31522e-05	4.41005e-05	2.31	3.58	2.19	2.4	3.6	3.56
ENSMUSG00000014444.17	Piezo1	PIEZO1	-1.29	6.33	1.08163e-05	3.80554e-05	5.69	6.97	5.83	5.54	6.99	6.95
ENSMUSG00000037958.13	Nsrp1	NSRP1	-1.29	4.23	1.82657e-05	5.67763e-05	3.58	4.88	3.42	3.74	4.91	4.84
ENSMUSG00000032012.8	Nectin1	NECTIN1	-1.29	1.47	5.33005e-05	0.000134688	0.84	2.12	0.78	0.86	2.11	2.12
ENSMUSG00000051650.11	B3gnt2	B3GNT2	-1.29	5.09	0.000109277	0.000243001	4.45	5.73	4.67	4.22	5.84	5.62
ENSMUSG00000072494.7	Ppp1r3e	PPP1R3E	-1.29	1.11	0.000402011	0.000742556	0.49	1.76	0.69	0.24	1.73	1.77
ENSMUSG00000027950.7	Chrnb2	CHRNB2	-1.29	-1.38	0.00888887	0.0120774	-1.9	-0.68	-1.84	-2.23	-1.01	-0.45
ENSMUSG00000039770.6	Ypel5	YPEL5	-1.28	6.2	3.40468e-07	4.28192e-06	5.56	6.85	5.56	5.56	6.83	6.86
ENSMUSG00000003380.11	Rabac1	RABAC1	-1.28	6.12	6.1785e-07	5.83186e-06	5.48	6.77	5.44	5.52	6.73	6.8
ENSMUSG00000043421.8	Hilpda	HILPDA	-1.28	6.82	6.62915e-07	6.06618e-06	6.18	7.46	6.22	6.14	7.44	7.49
ENSMUSG00000034931.15	Dhx8	DHX8	-1.28	5.04	7.63268e-07	6.51865e-06	4.4	5.67	4.45	4.35	5.68	5.67
ENSMUSG00000019487.11	Trip10	TRIP10	-1.28	5.77	8.00854e-07	6.68413e-06	5.13	6.41	5.12	5.14	6.35	6.47
ENSMUSG00000020694.17	Tlk2	TLK2	-1.28	6.1	8.76376e-07	7.07042e-06	5.46	6.73	5.4	5.52	6.76	6.71
ENSMUSG00000020400.17	Tnip1	TNIP1	-1.28	5.12	3.4019e-06	1.67877e-05	4.48	5.75	4.38	4.58	5.79	5.72
ENSMUSG00000029064.15	Gnb1	GNB1	-1.28	8.34	4.22381e-06	1.94388e-05	7.7	8.98	7.59	7.81	8.98	8.98
ENSMUSG00000036854.14	Hspb6	HSPB6	-1.28	3.14	6.7871e-06	2.72638e-05	2.5	3.78	2.57	2.42	3.81	3.75
ENSMUSG00000030257.16	Srgap3	SRGAP3	-1.28	2.84	9.94414e-06	3.58092e-05	2.21	3.49	2.28	2.12	3.5	3.46
ENSMUSG00000031157.10	Pqbp1	PQBP1	-1.28	4.99	9.09453e-06	3.35281e-05	4.35	5.63	4.2	4.49	5.63	5.64
ENSMUSG00000030168.13	Adipor2	ADIPOR2	-1.28	7.14	1.08855e-05	3.82345e-05	6.5	7.79	6.35	6.65	7.78	7.79
ENSMUSG00000046794.9	Ppp1r3b	PPP1R3B	-1.28	0.18	0.000579857	0.00102944	-0.42	0.83	-0.36	-0.57	0.86	0.78
ENSMUSG00000032452.12	Clstn2	CLSTN2	-1.28	0.42	0.000838819	0.00142862	-0.18	1.08	-0.01	-0.43	0.99	1.14
ENSMUSG00000060404.3	Olfr1369-ps1	OLFR1369-PS1	-1.28	-1.4	0.00501449	0.00714471	-1.9	-0.72	-2.18	-1.89	-0.65	-0.87
ENSMUSG00000019817.18	Plagl1	PLAGL1	-1.28	-0.63	0.00834789	0.0114053	-1.18	0.04	-0.82	-1.71	-0.06	0.09
ENSMUSG00000032735.15	Ablim3	ABLIM3	-1.28	-2.78	0.0149877	0.0195743	-3.08	-2.02	-3.48	-3.35	-2.11	-2.17
ENSMUSG00000032548.14	Slco2a1	SLCO2A1	-1.28	-2.31	0.0247205	0.0312621	-2.7	-1.56	-3	-2.92	-2.11	-1.21
ENSMUSG00000003269.17	Cyth2	CYTH2	-1.27	6.29	3.606e-07	4.38877e-06	5.66	6.93	5.66	5.66	6.92	6.94
ENSMUSG00000024943.9	Smc5	SMC5	-1.27	6.45	3.62856e-07	4.38877e-06	5.81	7.08	5.82	5.81	7.09	7.08
ENSMUSG00000024052.17	Lpin2	LPIN2	-1.27	5.79	4.07003e-07	4.65295e-06	5.15	6.42	5.13	5.16	6.44	6.4
ENSMUSG00000032178.14	Ilf3	ILF3	-1.27	7.17	4.22098e-07	4.73081e-06	6.53	7.8	6.54	6.52	7.81	7.8
ENSMUSG00000024817.13	Uhrf2	UHRF2	-1.27	7.43	4.37257e-07	4.84453e-06	6.79	8.06	6.8	6.78	8.06	8.06
ENSMUSG00000032115.14	Hyou1	HYOU1	-1.27	7.47	7.00877e-07	6.2141e-06	6.84	8.11	6.79	6.88	8.1	8.11
ENSMUSG00000025265.14	Fgd1	FGD1	-1.27	4.45	7.52876e-07	6.46416e-06	3.83	5.08	3.82	3.81	5.08	5.09
ENSMUSG00000040560.10	Wdr7	WDR7	-1.27	4.53	7.48457e-07	6.46416e-06	3.9	5.17	3.9	3.89	5.15	5.19
ENSMUSG00000089872.10	Rps6kc1	RPS6KC1	-1.27	4.78	8.62378e-07	6.9993e-06	4.15	5.42	4.11	4.19	5.4	5.44
ENSMUSG00000026509.15	Capn2	CAPN2	-1.27	6.62	8.46365e-07	6.90951e-06	5.99	7.25	5.94	6.04	7.22	7.29
ENSMUSG00000034575.13	Tent4a	TENT4A	-1.27	5.44	8.59132e-07	6.97746e-06	4.81	6.07	4.86	4.75	6.1	6.05
ENSMUSG00000022241.6	Tars	TARS	-1.27	6.77	8.99757e-07	7.18662e-06	6.13	7.4	6.08	6.19	7.39	7.42
ENSMUSG00000078517.12	Emc1	EMC1	-1.27	6.11	1.31816e-06	8.96662e-06	5.48	6.75	5.55	5.41	6.71	6.78
ENSMUSG00000024527.10	Afg3l2	AFG3L2	-1.27	6.02	1.55928e-06	9.95974e-06	5.39	6.66	5.31	5.47	6.63	6.69
ENSMUSG00000021009.15	Ptpn21	PTPN21	-1.27	4.87	1.94106e-06	1.14927e-05	4.24	5.51	4.32	4.16	5.49	5.53
ENSMUSG00000026123.11	Plekhb2	PLEKHB2	-1.27	5.93	1.90358e-06	1.1351e-05	5.29	6.56	5.2	5.38	6.56	6.57
ENSMUSG00000023845.7	Lnpep	LNPEP	-1.27	7.45	2.23385e-06	1.26367e-05	6.82	8.08	6.73	6.9	8.09	8.07
ENSMUSG00000024483.19	Ankhd1	ANKHD1	-1.27	6.02	2.94474e-06	1.52442e-05	5.38	6.65	5.48	5.28	6.68	6.63
ENSMUSG00000032902.1	Slc16a1	SLC16A1	-1.27	8	3.54631e-06	1.7243e-05	7.37	8.63	7.27	7.47	8.63	8.63
ENSMUSG00000025212.17	Sfxn3	SFXN3	-1.27	4.75	3.91645e-06	1.84293e-05	4.12	5.39	4.23	4.01	5.4	5.37
ENSMUSG00000020715.9	Ern1	ERN1	-1.27	3.84	4.49776e-06	2.03061e-05	3.21	4.47	3.29	3.12	4.45	4.5
ENSMUSG00000022620.14	Arsa	ARSA	-1.27	4.32	5.04337e-06	2.19408e-05	3.68	4.95	3.57	3.79	4.94	4.96
ENSMUSG00000028793.15	Rnf19b	RNF19B	-1.27	4.89	4.81721e-06	2.12363e-05	4.25	5.53	4.14	4.37	5.53	5.52
ENSMUSG00000032590.14	Apeh	APEH	-1.27	6.24	4.6538e-06	2.07858e-05	5.61	6.88	5.49	5.73	6.89	6.86
ENSMUSG00000037108.13	Zcwpw1	ZCWPW1	-1.27	3.2	8.36524e-06	3.15998e-05	2.58	3.84	2.65	2.48	3.87	3.8
ENSMUSG00000060992.9	Copz1	COPZ1	-1.27	6.18	7.13391e-06	2.82746e-05	5.54	6.82	5.41	5.68	6.82	6.82
ENSMUSG00000049807.16	Arhgap23	ARHGAP23	-1.27	4.58	8.3829e-06	3.1638e-05	3.96	5.22	4.08	3.82	5.25	5.19
ENSMUSG00000030527.15	Crtc3	CRTC3	-1.27	3.5	1.14345e-05	3.96531e-05	2.88	4.14	2.99	2.75	4.14	4.13
ENSMUSG00000020263.14	Appl2	APPL2	-1.27	4.72	1.00266e-05	3.59824e-05	4.09	5.36	4.22	3.96	5.3	5.41
ENSMUSG00000073678.4	Pgap1	PGAP1	-1.27	4.73	1.66095e-05	5.2804e-05	4.09	5.37	3.93	4.25	5.4	5.32
ENSMUSG00000006567.11	Atp7b	ATP7B	-1.27	2.12	3.21158e-05	8.92707e-05	1.5	2.76	1.46	1.52	2.83	2.67
ENSMUSG00000023266.11	Frs3	FRS3	-1.27	1.48	5.70221e-05	0.000141951	0.86	2.13	0.86	0.83	2.09	2.15
ENSMUSG00000032458.6	Copb2	COPB2	-1.27	7.42	4.33985e-05	0.000113999	6.79	8.05	6.59	6.99	8.05	8.06
ENSMUSG00000003420.8	Fcgrt	FCGRT	-1.27	1.52	8.3811e-05	0.000195034	0.9	2.16	0.87	0.9	2.06	2.25
ENSMUSG00000033059.7	Pygb	PYGB	-1.27	5.66	4.77672e-05	0.000123183	5.02	6.29	4.81	5.23	6.27	6.31
ENSMUSG00000027386.9	Fbln7	FBLN7	-1.27	-0.82	0.00376982	0.00551257	-1.36	-0.16	-1.2	-1.71	-0.19	-0.19
ENSMUSG00000048108.13	Tmem72	TMEM72	-1.27	-2.12	0.0554873	0.0665656	-2.5	-1.42	-1.97	-3.53	-1.42	-1.56
ENSMUSG00000019189.13	Rnf145	RNF145	-1.26	6.18	4.05595e-07	4.64453e-06	5.55	6.81	5.56	5.55	6.83	6.79
ENSMUSG00000068040.10	Tm9sf4	TM9SF4	-1.26	5.31	4.11394e-07	4.67909e-06	4.68	5.94	4.68	4.68	5.94	5.94
ENSMUSG00000027007.16	Itprid2	ITPRID2	-1.26	5.37	4.1204e-07	4.68072e-06	4.74	6.01	4.73	4.75	6.02	6
ENSMUSG00000035614.11	Togaram1	TOGARAM1	-1.26	5.77	4.41526e-07	4.86608e-06	5.14	6.39	5.13	5.14	6.42	6.37
ENSMUSG00000061479.15	Snrpa	SNRPA	-1.26	6.32	5.0789e-07	5.23902e-06	5.7	6.95	5.68	5.71	6.98	6.92
ENSMUSG00000054008.9	Ndst1	NDST1	-1.26	6.27	5.61086e-07	5.5765e-06	5.64	6.9	5.68	5.6	6.92	6.89
ENSMUSG00000059288.14	Cdyl	CDYL	-1.26	4.55	8.27475e-07	6.80838e-06	3.92	5.18	3.95	3.89	5.19	5.17
ENSMUSG00000045973.18	Slc25a51	SLC25A51	-1.26	6.92	1.36245e-06	9.16374e-06	6.29	7.55	6.22	6.36	7.55	7.56
ENSMUSG00000038542.14	Pcid2	PCID2	-1.26	4.24	1.97839e-06	1.16152e-05	3.62	4.87	3.61	3.61	4.93	4.81
ENSMUSG00000014470.4	Rnf166	RNF166	-1.26	4.07	2.6241e-06	1.4084e-05	3.44	4.7	3.38	3.5	4.66	4.74
ENSMUSG00000029922.15	Mkrn1	MKRN1	-1.26	4.97	4.02715e-06	1.87675e-05	4.34	5.61	4.23	4.45	5.58	5.63
ENSMUSG00000112449.1	Srp54b	SRP54B	-1.26	5.77	5.21034e-06	2.24418e-05	5.14	6.39	5.03	5.25	6.44	6.35
ENSMUSG00000040462.13	Os9	OS9	-1.26	5.64	6.59123e-06	2.66964e-05	5.01	6.27	4.88	5.14	6.26	6.28
ENSMUSG00000056537.11	Rlim	RLIM	-1.26	7.7	7.71314e-06	2.9827e-05	7.08	8.33	6.95	7.2	8.34	8.32
ENSMUSG00000068758.8	Il3ra	IL3RA	-1.26	2.76	1.09457e-05	3.84031e-05	2.14	3.4	2.12	2.15	3.46	3.33
ENSMUSG00000032231.14	Anxa2	ANXA2	-1.26	9.53	1.34906e-05	4.49711e-05	8.9	10.16	8.76	9.04	10.15	10.16
ENSMUSG00000002625.10	Akap8l	AKAP8L	-1.26	5.33	1.469e-05	4.80387e-05	4.7	5.96	4.86	4.54	5.97	5.94
ENSMUSG00000010362.9	Rdm1	RDM1	-1.26	2.57	2.9173e-05	8.28091e-05	1.96	3.2	1.92	1.97	3.31	3.09
ENSMUSG00000022500.15	Litaf	LITAF	-1.26	7.11	2.18157e-05	6.55834e-05	6.48	7.74	6.31	6.65	7.76	7.72
ENSMUSG00000027962.14	Vcam1	VCAM1	-1.26	6.39	2.73814e-05	7.88422e-05	5.76	7.01	5.58	5.94	7.02	7.01
ENSMUSG00000054277.8	Arfgap3	ARFGAP3	-1.26	5.23	3.08884e-05	8.65134e-05	4.61	5.87	4.41	4.79	5.86	5.87
ENSMUSG00000005836.10	Gata6	GATA6	-1.26	0.81	0.000376772	0.00070213	0.21	1.44	0.34	0.01	1.45	1.42
ENSMUSG00000026430.16	Rassf5	RASSF5	-1.26	1.03	0.000803017	0.00137435	0.43	1.67	0.12	0.67	1.65	1.67
ENSMUSG00000037221.13	Mospd3	MOSPD3	-1.26	0.75	0.00116023	0.00190737	0.15	1.38	0.4	-0.16	1.31	1.44
ENSMUSG00000027824.5	Vmn2r1	VMN2R1	-1.26	-1.43	0.00498996	0.00711217	-1.92	-0.75	-1.97	-2.15	-0.9	-0.69
ENSMUSG00000070509.15	Rgma	RGMA	-1.26	-0.1	0.00546996	0.00772968	-0.66	0.55	-0.31	-1.14	0.61	0.45
ENSMUSG00000036693.12	Nop14	NOP14	-1.25	6.08	4.23861e-07	4.74211e-06	5.46	6.7	5.45	5.47	6.69	6.72
ENSMUSG00000040423.10	Rc3h1	RC3H1	-1.25	6.08	4.29843e-07	4.79622e-06	5.46	6.7	5.44	5.47	6.69	6.71
ENSMUSG00000034681.17	Rnps1	RNPS1	-1.25	7.31	4.75067e-07	5.07978e-06	6.68	7.94	6.67	6.69	7.93	7.94
ENSMUSG00000041570.14	Camsap2	CAMSAP2	-1.25	5.81	5.53085e-07	5.55318e-06	5.19	6.44	5.22	5.15	6.43	6.45
ENSMUSG00000061104.5	Sap18b	SAP18B	-1.25	6.15	6.32055e-07	5.90092e-06	5.53	6.78	5.48	5.57	6.77	6.78
ENSMUSG00000001472.17	Tcf25	TCF25	-1.25	8.35	6.93423e-07	6.1833e-06	7.73	8.98	7.74	7.72	8.97	8.98
ENSMUSG00000026740.12	Dnajc1	DNAJC1	-1.25	4.56	1.23463e-06	8.62732e-06	3.94	5.19	3.95	3.92	5.23	5.14
ENSMUSG00000069565.12	Dazap1	DAZAP1	-1.25	6.7	1.17653e-06	8.35607e-06	6.07	7.33	6.01	6.14	7.33	7.32
ENSMUSG00000022329.15	Stk3	STK3	-1.25	4.97	1.21028e-06	8.52385e-06	4.35	5.59	4.28	4.4	5.6	5.59
ENSMUSG00000055553.16	Kxd1	KXD1	-1.25	5.01	1.27195e-06	8.78701e-06	4.38	5.64	4.32	4.45	5.64	5.64
ENSMUSG00000031865.16	Dctn1	DCTN1	-1.25	5.98	1.54339e-06	9.89848e-06	5.36	6.61	5.28	5.43	6.57	6.64
ENSMUSG00000006740.14	Kif5b	KIF5B	-1.25	7.78	1.78306e-06	1.08871e-05	7.16	8.41	7.08	7.23	8.41	8.4
ENSMUSG00000021012.16	Zc3h14	ZC3H14	-1.25	7.58	1.83943e-06	1.11162e-05	6.96	8.21	6.88	7.04	8.2	8.21
ENSMUSG00000028958.15	Tmub1	TMUB1	-1.25	3.75	2.62421e-06	1.4084e-05	3.13	4.38	3.09	3.17	4.35	4.4
ENSMUSG00000001403.13	Ube2c	UBE2C	-1.25	6.43	2.56931e-06	1.39021e-05	5.81	7.06	5.72	5.91	7.05	7.07
ENSMUSG00000033653.18	Vps8	VPS8	-1.25	4.18	2.9958e-06	1.53755e-05	3.56	4.81	3.48	3.63	4.83	4.79
ENSMUSG00000028514.15	Usp24	USP24	-1.25	6.24	3.30164e-06	1.64154e-05	5.62	6.87	5.71	5.51	6.83	6.9
ENSMUSG00000032399.8	Rpl4	RPL4	-1.25	11.6	5.9236e-06	2.46161e-05	10.97	12.23	10.89	11.05	12.22	12.23
ENSMUSG00000060519.11	Tor3a	TOR3A	-1.25	3.24	8.9319e-06	3.31817e-05	2.62	3.87	2.53	2.69	3.91	3.81
ENSMUSG00000020473.13	Aebp1	AEBP1	-1.25	6.99	8.02977e-06	3.0636e-05	6.37	7.62	6.5	6.23	7.62	7.62
ENSMUSG00000021114.9	Atp6v1d	ATP6V1D	-1.25	6	9.73757e-06	3.52675e-05	5.38	6.63	5.23	5.52	6.65	6.61
ENSMUSG00000040481.17	Bptf	BPTF	-1.25	6.24	1.13716e-05	3.95221e-05	5.61	6.86	5.76	5.46	6.87	6.85
ENSMUSG00000000346.9	Dazap2	DAZAP2	-1.25	6.97	1.67194e-05	5.31265e-05	6.34	7.58	6.18	6.5	7.58	7.59
ENSMUSG00000032249.14	Anp32a	ANP32A	-1.25	7.41	1.95843e-05	6.02785e-05	6.79	8.03	6.62	6.95	8.02	8.04
ENSMUSG00000031822.20	Gse1	GSE1	-1.25	3.71	3.85401e-05	0.000103709	3.09	4.34	3.27	2.91	4.34	4.34
ENSMUSG00000007817.15	Zmiz1	ZMIZ1	-1.25	4.86	6.36204e-05	0.000155398	4.25	5.49	4.46	4.02	5.5	5.48
ENSMUSG00000014773.13	Dll1	DLL1	-1.25	1.08	0.00029115	0.000561131	0.48	1.7	0.59	0.32	1.78	1.61
ENSMUSG00000032265.14	Tent5a	TENT5A	-1.25	1.01	0.000341298	0.000643178	0.4	1.64	0.37	0.39	1.47	1.79
ENSMUSG00000019889.10	Ptprk	PTPRK	-1.24	6.94	5.04838e-07	5.23159e-06	6.32	7.56	6.31	6.34	7.57	7.56
ENSMUSG00000046841.5	Ckap4	CKAP4	-1.24	6.42	6.28311e-07	5.88673e-06	5.8	7.04	5.77	5.83	7.01	7.06
ENSMUSG00000035027.18	Map2k2	MAP2K2	-1.24	6.22	6.32432e-07	5.90092e-06	5.61	6.85	5.64	5.58	6.82	6.87
ENSMUSG00000028630.9	Dyrk2	DYRK2	-1.24	5.31	7.95345e-07	6.66338e-06	4.69	5.93	4.65	4.72	5.9	5.96
ENSMUSG00000037730.13	Mynn	MYNN	-1.24	5.8	1.02295e-06	7.71586e-06	5.18	6.43	5.24	5.12	6.41	6.44
ENSMUSG00000027506.15	Tpd52	TPD52	-1.24	7.72	2.27742e-06	1.28139e-05	7.1	8.34	7.02	7.18	8.34	8.33
ENSMUSG00000036371.6	Serbp1	SERBP1	-1.24	9.33	2.5167e-06	1.3712e-05	8.71	9.96	8.64	8.78	9.95	9.97
ENSMUSG00000031762.7	Mt2	MT2	-1.24	4.79	2.64977e-06	1.41727e-05	4.18	5.41	4.09	4.26	5.44	5.38
ENSMUSG00000032547.12	Ryk	RYK	-1.24	6.76	2.96772e-06	1.5319e-05	6.14	7.38	6.05	6.24	7.38	7.39
ENSMUSG00000029577.13	Ube3b	UBE3B	-1.24	6.2	4.01315e-06	1.87509e-05	5.59	6.82	5.69	5.48	6.83	6.81
ENSMUSG00000045817.8	Zfp36l2	ZFP36L2	-1.24	6.08	4.84072e-06	2.12945e-05	5.46	6.7	5.57	5.34	6.71	6.69
ENSMUSG00000026853.15	Crat	CRAT	-1.24	3.69	6.38816e-06	2.61011e-05	3.08	4.3	2.98	3.16	4.34	4.27
ENSMUSG00000044328.13	Trp53i13	TRP53I13	-1.24	2.77	8.69933e-06	3.25003e-05	2.16	3.38	2.15	2.15	3.35	3.42
ENSMUSG00000047648.13	Fbxo30	FBXO30	-1.24	5.98	7.3784e-06	2.89062e-05	5.36	6.6	5.23	5.49	6.57	6.62
ENSMUSG00000000782.15	Tcf7	TCF7	-1.24	3.13	2.11212e-05	6.3836e-05	2.51	3.75	2.39	2.63	3.8	3.69
ENSMUSG00000048562.7	Sp8	SP8	-1.24	3.33	3.45701e-05	9.4896e-05	2.72	3.95	2.86	2.56	4.01	3.89
ENSMUSG00000047193.16	Dync2h1	DYNC2H1	-1.24	3.57	3.40293e-05	9.37186e-05	2.95	4.19	3.12	2.78	4.16	4.21
ENSMUSG00000054693.14	Adam10	ADAM10	-1.24	7.12	3.57222e-05	9.76318e-05	6.51	7.74	6.32	6.69	7.73	7.75
ENSMUSG00000047656.9	Trpt1	TRPT1	-1.24	1.3	9.0364e-05	0.000207253	0.7	1.93	0.65	0.71	1.95	1.89
ENSMUSG00000032174.5	Icam5	ICAM5	-1.24	1	0.000154545	0.000325899	0.4	1.62	0.44	0.32	1.62	1.62
ENSMUSG00000024393.14	Prrc2a	PRRC2A	-1.24	6.98	0.000128383	0.000278152	6.37	7.61	6.61	6.12	7.61	7.6
ENSMUSG00000071604.5	Fam189a2	FAM189A2	-1.24	2.48	0.000325599	0.000618042	1.88	3.11	1.63	2.11	3.22	2.98
ENSMUSG00000074824.3	Rslcan18	RSLCAN18	-1.24	-1.1	0.00460708	0.00661372	-1.62	-0.44	-1.94	-1.52	-0.46	-0.51
ENSMUSG00000034593.16	Myo5a	MYO5A	-1.23	6.51	5.60102e-07	5.57495e-06	5.9	7.13	5.88	5.92	7.15	7.11
ENSMUSG00000025024.7	Smndc1	SMNDC1	-1.23	5.42	6.03047e-07	5.77431e-06	4.81	6.03	4.77	4.84	6.02	6.04
ENSMUSG00000029681.12	Bcl7b	BCL7B	-1.23	4.85	7.32221e-07	6.38863e-06	4.24	5.46	4.23	4.24	5.49	5.44
ENSMUSG00000038368.16	Focad	FOCAD	-1.23	5.21	7.54469e-07	6.46416e-06	4.59	5.82	4.56	4.62	5.85	5.79
ENSMUSG00000039879.9	Heca	HECA	-1.23	5.33	8.30714e-07	6.82028e-06	4.72	5.95	4.67	4.76	5.95	5.94
ENSMUSG00000071074.9	Yipf3	YIPF3	-1.23	4.51	1.16887e-06	8.31577e-06	3.9	5.12	3.87	3.92	5.15	5.09
ENSMUSG00000031149.7	Praf2	PRAF2	-1.23	5.75	1.09518e-06	8.00301e-06	5.13	6.36	5.07	5.19	6.37	6.35
ENSMUSG00000074582.10	Arfgef2	ARFGEF2	-1.23	4.65	1.3238e-06	8.99176e-06	4.03	5.27	4.08	3.98	5.25	5.28
ENSMUSG00000033128.9	Gga1	GGA1	-1.23	4.67	1.38216e-06	9.24903e-06	4.05	5.28	4.1	4.01	5.25	5.31
ENSMUSG00000004931.11	Apba3	APBA3	-1.23	4.93	1.39226e-06	9.28953e-06	4.31	5.54	4.28	4.35	5.49	5.59
ENSMUSG00000015094.16	Npdc1	NPDC1	-1.23	4.37	1.58032e-06	1.00329e-05	3.76	4.98	3.72	3.8	5.01	4.96
[truncated: 10,565 more rows]
