# Supplementary material for: The context-dependent epigenetic and organogenesis programs determine 3D vs. 2D cellular fitness of MYC-driven murine liver cancer cells
Source: eLife. 2025 May 6;14:RP101299. doi: 10.7554/eLife.101299 (PMC12055005; doi:10.7554/eLife.101299)
Supplement: Supplementary file 3. [file elife-101299-supp3.xlsx]

## Sheet: A3SS
ID	GeneID	geneSymbol	chr	strand	longExonStart_0base	longExonEnd	shortES	shortEE	flankingES	flankingEE	ID.1	IJC_SAMPLE_1	SJC_SAMPLE_1	IJC_SAMPLE_2	SJC_SAMPLE_2	IncFormLen	SkipFormLen	PValue	FDR	IncLevel1	IncLevel2	IncLevelDifference
29288	ENSMUSG00000029385.14	Ccng2	chr5	+	93273252	93273485	93273389	93273485	93271362	93271461	29288	0,0	1,2	4,1	0,0	198	99	1.724e-09	6.22604e-07	0.0,0.0	1.0,1.0	-1
29715	ENSMUSG00000067150.6	Xpo5	chr17	+	46222460	46222791	46222672	46222791	46221352	46221481	29715	0,0	13,3	1,1	0,0	198	99	6.24991e-09	1.83484e-06	0.0,0.0	1.0,1.0	-1
40138	ENSMUSG00000053453.9	Thoc7	chr14	-	13949011	13949378	13949011	13949350	13950131	13950296	40138	0,0	1,2	1,2	0,0	127	99	5.26483e-09	1.60712e-06	0.0,0.0	1.0,1.0	-1
45439	ENSMUSG00000041264.16	Uspl1	chr5	+	149200588	149200919	149200851	149200919	149198644	149198758	45439	0,0	1,2	1,1	0,0	198	99	5.94589e-09	1.76488e-06	0.0,0.0	1.0,1.0	-1
53052	ENSMUSG00000052911.9	Lamb2	chr9	+	108488235	108488442	108488282	108488442	108487946	108488131	53052	0,0	1,1	3,3	0,0	146	99	2.59507e-09	8.85079e-07	0.0,0.0	1.0,1.0	-1
53657	ENSMUSG00000031592.10	Pcm1	chr8	+	41270421	41270550	41270449	41270550	41267186	41267364	53657	0,0	2,1	1,1	0,0	127	99	9.45551e-09	2.64582e-06	0.0,0.0	1.0,1.0	-1
27060	ENSMUSG00000028070.7	Naxe	chr3	-	88056519	88056819	88056519	88056764	88056985	88057133	27060	0,0	1,3	2,10	0,1	154	99	1.59468e-10	7.58179e-08	0.0,0.0	1.0,0.865	-0.932
47151	ENSMUSG00000049555.10	Tmie	chr9	-	110873795	110874098	110873795	110874026	110875427	110875537	47151	3,0	8,3	3,1	0,0	171	99	5.89413e-10	2.39896e-07	0.178,0.0	1.0,1.0	-0.911
56553	ENSMUSG00000032396.17	Dis3l	chr9	-	64307010	64307343	64307010	64307243	64307429	64307604	56553	0,1	1,2	2,1	0,0	198	99	1.12297e-06	0.000176407	0.0,0.2	1.0,1.0	-0.9
31548	ENSMUSG00000032231.14	Anxa2	chr9	+	69491449	69491795	69491531	69491795	69489651	69489774	31548	2,0	3,2	1,1	0,0	181	99	4.53873e-09	1.41769e-06	0.267,0.0	1.0,1.0	-0.867
17211	ENSMUSG00000018651.14	Tada2a	chr11	-	84089987	84090085	84089987	84090000	84090548	84090659	17211	0,0	1,2	1,5	0,1	184	99	2.86434e-08	6.90076e-06	0.0,0.0	1.0,0.729	-0.865
22523	ENSMUSG00000054619.7	Mettl7a1	chr15	+	100305161	100305344	100305173	100305344	100304996	100305074	22523	0,0	4,2	6,2	2,0	111	99	3.79887e-09	1.25211e-06	0.0,0.0	0.728,1.0	-0.864
7285	ENSMUSG00000025188.15	Hps1	chr19	-	42765912	42766367	42765912	42765982	42766709	42766833	7285	4,0	5,2	3,2	0,0	198	99	2.1407e-09	7.46813e-07	0.286,0.0	1.0,1.0	-0.857
753	ENSMUSG00000007591.15	Tssk4	chr14	+	55651470	55651852	55651488	55651852	55650900	55651115	753	1,0	2,1	1,1	0,0	117	99	1.02099e-05	0.00112244	0.297,0.0	1.0,1.0	-0.852
38308	ENSMUSG00000026632.17	Tatdn3	chr1	-	191052859	191053011	191052859	191052974	191054855	191054911	38308	0,0	3,2	4,3	0,1	136	99	4.80635e-10	1.98632e-07	0.0,0.0	1.0,0.686	-0.843
32730	ENSMUSG00000031816.15	Mthfsd	chr8	-	121105978	121106292	121105978	121106021	121106869	121106973	32730	0,1	1,1	1,1	0,0	198	99	0.000271237	0.0151636	0.0,0.333	1.0,1.0	-0.834
33718	ENSMUSG00000038429.10	Usp5	chr6	-	124822726	124823019	124822726	124822752	124823452	124823623	33718	1,0	1,1	1,3	0,0	198	99	0.000271237	0.0151636	0.333,0.0	1.0,1.0	-0.834
48128	ENSMUSG00000035569.17	Ankrd11	chr8	-	122973075	122973508	122973075	122973245	122974728	122974793	48128	0,0	2,1	4,1	1,0	198	99	3.66251e-07	6.60296e-05	0.0,0.0	0.667,1.0	-0.834
4226	ENSMUSG00000026826.13	Nr4a2	chr2	-	57112950	57113289	57112950	57113072	57114717	57115038	4226	6,5	11,16	13,3	0,0	198	99	6.96171e-11	3.63124e-08	0.214,0.135	1.0,1.0	-0.826
16294	ENSMUSG00000020766.4	Galk1	chr11	-	116008456	116008711	116008456	116008703	116008802	116008965	16294	0,0	1,2	2,1	1,0	107	99	2.91514e-05	0.00262778	0.0,0.0	0.649,1.0	-0.825
22146	ENSMUSG00000029064.15	Gnb1	chr4	+	155557375	155557653	155557454	155557653	155557170	155557286	22146	0,1	1,1	2,2	0,0	178	99	0.000378439	0.0198164	0.0,0.357	1.0,1.0	-0.822
30005	ENSMUSG00000023892.8	Zfp51	chr17	+	21462628	21462748	21462696	21462748	21461660	21461787	30005	1,0	1,1	5,2	0,0	167	99	0.000462316	0.0232783	0.372,0.0	1.0,1.0	-0.814
47174	ENSMUSG00000066037.14	Hnrnpr	chr4	+	136314068	136314255	136314131	136314255	136311027	136311089	47174	0,2	5,2	3,4	0,0	162	99	2.74334e-10	1.20808e-07	0.0,0.379	1.0,1.0	-0.81
39229	ENSMUSG00000038172.14	Ttc39b	chr4	-	83231963	83232370	83231963	83232055	83232710	83233170	39229	0,0	2,1	2,3	0,1	198	99	2.72728e-07	5.14116e-05	0.0,0.0	1.0,0.6	-0.8
52084	ENSMUSG00000046879.7	Irgm1	chr11	-	48867833	48868015	48867833	48868007	48868561	48868780	52084	0,3	3,4	1,1	0,0	107	99	5.25562e-08	1.18638e-05	0.0,0.41	1.0,1.0	-0.795
56089	ENSMUSG00000042496.18	Prdm10	chr9	+	31315977	31316334	31316241	31316334	31313552	31313621	56089	1,4	4,4	1,2	0,0	198	99	1.79132e-09	6.37343e-07	0.111,0.333	1.0,1.0	-0.778
23895	ENSMUSG00000019261.3	Map1s	chr8	+	70912008	70912266	70912233	70912266	70911845	70911928	23895	2,1	3,2	1,1	0,0	198	99	8.94509e-07	0.000144751	0.25,0.2	1.0,1.0	-0.775
35393	ENSMUSG00000039178.9	Tbc1d19	chr5	+	53831366	53831488	53831388	53831488	53830454	53830500	35393	3,0	3,1	3,1	0,0	121	99	8.98063e-05	0.00631524	0.45,0.0	1.0,1.0	-0.775
41071	ENSMUSG00000031098.18	Syt8	chr7	+	142439633	142439984	142439850	142439984	142439359	142439521	41071	0,0	2,3	7,3	3,0	198	99	6.46635e-07	0.000109247	0.0,0.0	0.538,1.0	-0.769
23872	ENSMUSG00000040729.8	Cep126	chr9	-	8077703	8078358	8077703	8078034	8079494	8079559	23872	0,7	4,4	1,3	0,0	198	99	1.7489e-08	4.45305e-06	0.0,0.467	1.0,1.0	-0.766
13228	ENSMUSG00000095493.2	A630023A22Rik	chr14	-	34052469	34052776	34052469	34052765	34054869	34055089	13228	0,2	1,2	6,2	0,0	110	99	0.00106817	0.0436074	0.0,0.474	1.0,1.0	-0.763
36534	ENSMUSG00000031278.12	Acsl4	chrX	-	142351378	142351661	142351378	142351524	142360386	142360484	36534	0,1	3,2	5,1	1,0	198	99	2.01181e-06	0.000282944	0.0,0.2	0.714,1.0	-0.757
7450	ENSMUSG00000024780.7	Cdc37l1	chr19	+	29015841	29016192	29016005	29016192	29012787	29012910	7450	0,4	7,2	2,2	0,0	198	99	5.15566e-09	1.58279e-06	0.0,0.5	1.0,1.0	-0.75
33686	ENSMUSG00000026135.17	Zfp142	chr1	-	74579324	74579676	74579324	74579618	74585383	74585697	33686	0,3	4,10	3,1	1,0	157	99	0.000155007	0.00978587	0.0,0.159	0.654,1.0	-0.747
9519	ENSMUSG00000073434.12	Wdr90	chr17	-	25859857	25860153	25859857	25859925	25860371	25860817	9519	1,3	1,6	5,2	0,0	198	99	3.99316e-09	1.30812e-06	0.333,0.2	1.0,1.0	-0.734
41380	ENSMUSG00000034159.12	Mab21l4	chr1	-	93159600	93160350	93159600	93159926	93160801	93160870	41380	3,1	3,2	4,2	0,0	198	99	2.54042e-07	4.82275e-05	0.333,0.2	1.0,1.0	-0.734
9710	ENSMUSG00000044533.15	Rps2	chr17	+	24720943	24721142	24721019	24721142	24720533	24720731	9710	0,0	9,4	2,9	0,6	175	99	3.96357e-06	0.000498695	0.0,0.0	1.0,0.459	-0.73
15578	ENSMUSG00000024858.14	Grk2	chr19	-	4287822	4288109	4287822	4287919	4288411	4288507	15578	3,5	8,4	4,2	0,0	198	99	3.02118e-08	7.21392e-06	0.158,0.385	1.0,1.0	-0.728
12936	ENSMUSG00000087556.1	Gm15764	chr16	+	18421659	18421997	18421682	18421997	18421168	18421287	12936	0,0	1,1	2,2	0,2	122	99	6.80204e-05	0.00506851	0.0,0.0	1.0,0.448	-0.724
13025	ENSMUSG00000058655.9	Eif4b	chr15	+	102088615	102088753	102088617	102088753	102084678	102084795	13025	5,0	4,2	1,4	0,0	101	99	3.94378e-06	0.00049737	0.551,0.0	1.0,1.0	-0.724
490	ENSMUSG00000031283.16	Chrdl1	chrX	-	143327921	143328067	143327921	143328064	143365896	143365990	490	2,2	10,3	1,2	0,0	102	99	6.3696e-08	1.41408e-05	0.163,0.393	1.0,1.0	-0.722
8749	ENSMUSG00000041057.10	Wdr43	chr17	+	71657192	71657390	71657316	71657390	71653452	71653522	8749	0,0	3,2	3,2	2,0	198	99	6.5684e-05	0.0049424	0.0,0.0	0.429,1.0	-0.715
17771	ENSMUSG00000040746.15	Rnf167	chr11	+	70650766	70651091	70650890	70651091	70650125	70650219	17771	1,3	3,2	1,1	0,0	198	99	1.44933e-07	2.99482e-05	0.143,0.429	1.0,1.0	-0.714
39684	ENSMUSG00000058173.12	Smco4	chr9	+	15504991	15505225	15505075	15505225	15493431	15493629	39684	0,0	2,2	4,4	3,0	183	99	2.86622e-06	0.000383844	0.0,0.0	0.419,1.0	-0.71
10502	ENSMUSG00000022855.9	Senp2	chr16	+	22035532	22036646	22036474	22036646	22032103	22032164	10502	0,2	2,8	2,2	0,1	198	99	0.000104908	0.0071254	0.0,0.111	1.0,0.5	-0.695
56381	ENSMUSG00000032306.14	Mpi	chr9	-	57549294	57549421	57549294	57549344	57550572	57550773	56381	0,1	3,1	5,2	1,0	176	99	1.51183e-06	0.000221922	0.0,0.36	0.738,1.0	-0.689
26696	ENSMUSG00000005968.14	Tuft1	chr3	-	94622393	94622590	94622393	94622509	94622687	94622816	26696	0,0	1,1	1,5	1,0	180	99	7.55724e-07	0.000124927	0.0,0.0	0.355,1.0	-0.677
5407	ENSMUSG00000051113.9	Fam71e1	chr7	+	44497405	44497633	44497502	44497633	44496914	44497033	5407	1,1	2,2	8,6	0,1	196	99	1.11535e-05	0.00120326	0.202,0.202	1.0,0.752	-0.674
51418	ENSMUSG00000070426.12	Rnf121	chr7	-	102041898	102042075	102041898	102041983	102042626	102042664	51418	0,0	1,1	2,2	2,0	191	99	0.00100643	0.0418827	0.0,0.0	0.341,1.0	-0.67
48729	ENSMUSG00000023883.13	Phf10	chr17	-	14956733	14956888	14956733	14956858	14959418	14959527	48729	0,0	3,1	2,2	3,0	129	99	0.000500015	0.0248414	0.0,0.0	0.338,1.0	-0.669
55650	ENSMUSG00000038895.16	Zfp653	chr9	-	22057286	22057716	22057286	22057673	22057803	22058415	55650	1,1	1,2	1,1	0,0	142	99	0.000533164	0.0260057	0.411,0.258	1.0,1.0	-0.665
19440	ENSMUSG00000034667.8	Xpot	chr10	-	121602230	121602396	121602230	121602393	121603028	121603314	19440	0,0	2,3	1,4	2,0	102	99	8.53256e-06	0.000953092	0.0,0.0	0.327,1.0	-0.663
25608	ENSMUSG00000028138.8	Adh5	chr3	+	138448039	138448181	138448133	138448181	138447851	138447939	25608	1,2	1,2	1,3	0,0	193	99	8.62981e-05	0.00610852	0.339,0.339	1.0,1.0	-0.661
6242	ENSMUSG00000032400.18	Zwilch	chr9	-	64146824	64146938	64146824	64146920	64149398	64149427	6242	5,0	2,3	5,2	0,0	117	99	1.15987e-05	0.00124488	0.679,0.0	1.0,1.0	-0.66
16233	ENSMUSG00000020792.15	Exoc7	chr11	-	116296729	116296886	116296729	116296798	116300265	116300433	16233	5,4	8,11	31,15	0,3	187	99	2.62187e-08	6.37325e-06	0.249,0.161	1.0,0.726	-0.658
11245	ENSMUSG00000022614.8	Lmf2	chr15	-	89354426	89354646	89354426	89354495	89355355	89355659	11245	4,4	3,5	2,6	0,0	198	99	5.5103e-08	1.2335e-05	0.4,0.286	1.0,1.0	-0.657
54262	ENSMUSG00000030555.16	Ttc23	chr7	+	67660682	67661000	67660891	67661000	67647459	67647845	54262	3,2	6,4	4,5	0,1	198	99	1.95984e-05	0.00194626	0.2,0.2	1.0,0.714	-0.657
30563	ENSMUSG00000029836.15	Cbx3	chr6	+	51471431	51471868	51471815	51471868	51470745	51470884	30563	3,3	10,5	4,8	0,2	198	99	0.000126444	0.00822422	0.13,0.231	1.0,0.667	-0.653
49701	ENSMUSG00000019737.14	Syne4	chr7	+	30317908	30318042	30317967	30318042	30317019	30317141	49701	1,0	4,2	5,3	4,0	158	99	0.000180263	0.0110052	0.135,0.0	0.439,1.0	-0.652
9518	ENSMUSG00000073434.12	Wdr90	chr17	-	25859857	25860116	25859857	25859925	25860371	25860817	9518	2,3	1,6	14,3	0,0	198	99	1.20783e-08	3.24452e-06	0.5,0.2	1.0,1.0	-0.65
41779	ENSMUSG00000025534.17	Gusb	chr5	-	129989580	129989891	129989580	129989721	129990016	129990642	41779	1,2	2,1	1,2	0,0	198	99	0.000676993	0.0312738	0.2,0.5	1.0,1.0	-0.65
14056	ENSMUSG00000021458.17	Aopep	chr13	+	63301126	63301232	63301144	63301232	63298792	63298856	14056	0,0	1,1	4,1	0,2	117	99	2.57046e-05	0.00236875	0.0,0.0	1.0,0.297	-0.648
44320	ENSMUSG00000000915.15	Hip1r	chr5	+	123996694	123996843	123996725	123996843	123996519	123996581	44320	1,1	2,1	1,2	0,0	130	99	0.000861792	0.0376115	0.276,0.432	1.0,1.0	-0.646
41072	ENSMUSG00000031098.18	Syt8	chr7	+	142439790	142439984	142439850	142439984	142439359	142439521	41072	0,1	2,3	4,2	3,0	159	99	0.000492133	0.0245952	0.0,0.172	0.454,1.0	-0.641
48882	ENSMUSG00000056952.13	Tatdn2	chr6	+	113709539	113709919	113709821	113709919	113707275	113707393	48882	1,0	1,1	1,3	0,1	198	99	5.31621e-05	0.00418175	0.333,0.0	1.0,0.6	-0.634
11246	ENSMUSG00000022614.8	Lmf2	chr15	-	89354426	89354780	89354426	89354495	89355355	89355659	11246	5,4	3,5	2,8	0,0	198	99	3.52291e-08	8.23003e-06	0.455,0.286	1.0,1.0	-0.629
35007	ENSMUSG00000027466.15	Rbck1	chr2	-	152322937	152323374	152322937	152323323	152324266	152324440	35007	3,4	5,3	1,1	0,0	150	99	1.03385e-07	2.18676e-05	0.284,0.468	1.0,1.0	-0.624
37966	ENSMUSG00000035559.9	Mpv17l2	chr8	-	70759108	70759508	70759108	70759237	70760367	70760837	37966	11,3	5,5	8,12	0,0	198	99	5.88955e-08	1.31293e-05	0.524,0.231	1.0,1.0	-0.623
9389	ENSMUSG00000024220.14	Zfp523	chr17	+	28202144	28202478	28202434	28202478	28201350	28201440	9389	2,5	4,2	14,6	0,0	198	99	2.16167e-07	4.17754e-05	0.2,0.556	1.0,1.0	-0.622
8135	ENSMUSG00000024513.16	Mbd2	chr18	+	70625853	70626131	70625879	70626131	70622582	70622721	8135	0,8	2,2	1,3	0,0	125	99	0.000607193	0.0286656	0.0,0.76	1.0,1.0	-0.62
33468	ENSMUSG00000020719.14	Ddx5	chr11	-	106782468	106782802	106782468	106782642	106783958	106784018	33468	2,3	4,5	8,3	2,0	198	99	0.000923017	0.0394524	0.2,0.231	0.667,1.0	-0.618
49313	ENSMUSG00000040940.18	Arhgef1	chr7	+	24912075	24912352	24912309	24912352	24908310	24908424	49313	11,2	6,4	11,20	0,1	198	99	1.7397e-06	0.000250578	0.478,0.2	1.0,0.909	-0.616
37121	ENSMUSG00000026193.15	Fn1	chr1	-	71613762	71614033	71613762	71613858	71615359	71615551	37121	11,10	10,7	3,1	0,0	198	99	1.15971e-05	0.00124488	0.355,0.417	1.0,1.0	-0.614
44217	ENSMUSG00000028106.13	Rprd2	chr3	-	95773069	95773223	95773069	95773153	95774111	95774372	44217	0,0	3,4	1,4	2,0	169	99	0.000366023	0.019279	0.0,0.0	0.227,1.0	-0.614
44411	ENSMUSG00000029478.16	Ncor2	chr5	-	125041795	125041967	125041795	125041886	125042744	125042865	44411	10,4	7,4	5,5	0,0	180	99	4.64177e-07	8.09672e-05	0.44,0.355	1.0,1.0	-0.603
47153	ENSMUSG00000049555.10	Tmie	chr9	-	110873795	110874177	110873795	110874026	110875427	110875537	47153	4,9	8,3	5,5	0,0	198	99	3.09637e-07	5.74029e-05	0.2,0.6	1.0,1.0	-0.6
15425	ENSMUSG00000021000.17	Mia2	chr12	+	59162921	59163019	59162925	59163019	59160175	59160266	15425	2,1	4,1	3,8	0,0	103	99	3.15761e-06	0.000413763	0.325,0.49	1.0,1.0	-0.593
10095	ENSMUSG00000022956.11	Atp5o	chr16	-	91926852	91927019	91926852	91926970	91928898	91929009	10095	1,0	1,2	1,2	0,1	148	99	0.000145811	0.00929265	0.401,0.0	1.0,0.572	-0.586
14312	ENSMUSG00000046876.16	Atxn1	chr13	-	45836585	45836754	45836585	45836681	45852327	45852456	14312	0,1	1,1	1,4	0,2	172	99	0.00125347	0.0490835	0.0,0.365	1.0,0.535	-0.585
25976	ENSMUSG00000002625.10	Akap8l	chr17	-	32321895	32322026	32321895	32322021	32332478	32332916	25976	1,0	1,3	6,6	3,0	104	99	0.000145677	0.00929265	0.488,0.0	0.656,1.0	-0.584
37349	ENSMUSG00000032507.15	Fbxl2	chr9	-	113989393	113989886	113989393	113989474	113990617	113990713	37349	0,0	1,1	4,2	1,1	198	99	7.76043e-06	0.000879598	0.0,0.0	0.667,0.5	-0.584
41827	ENSMUSG00000027291.15	Vps39	chr2	-	120338465	120338774	120338465	120338586	120339318	120339502	41827	1,0	1,3	5,2	0,1	198	99	4.03752e-06	0.000505631	0.333,0.0	1.0,0.5	-0.584
46025	ENSMUSG00000002409.18	Dyrk1b	chr7	+	28184987	28185436	28185295	28185436	28184240	28184527	46025	3,4	3,2	13,18	0,0	198	99	2.04108e-06	0.000285566	0.333,0.5	1.0,1.0	-0.584
16658	ENSMUSG00000075528.13	Aarsd1	chr11	-	101416747	101416955	101416747	101416925	101417102	101417234	16658	0,0	5,2	7,2	2,2	129	99	2.7738e-07	5.20607e-05	0.0,0.0	0.729,0.434	-0.582
27512	ENSMUSG00000057229.11	Dmac2	chr7	+	25620085	25620464	25620377	25620464	25619413	25619460	27512	7,1	2,2	3,2	0,0	198	99	0.000178501	0.0109225	0.636,0.2	1.0,1.0	-0.582
27518	ENSMUSG00000057229.11	Dmac2	chr7	+	25621974	25622387	25622343	25622387	25621423	25621512	27518	2,1	1,3	8,4	1,0	198	99	8.24989e-05	0.0059164	0.5,0.143	0.8,1.0	-0.579
31440	ENSMUSG00000023150.14	Ivns1abp	chr1	+	151361145	151361635	151361461	151361635	151360931	151361058	31440	7,3	9,5	23,18	2,2	198	99	1.8518e-06	0.000263893	0.28,0.231	0.852,0.818	-0.579
55681	ENSMUSG00000043067.15	Dpy19l1	chr9	-	24421080	24421204	24421080	24421200	24422259	24422359	55681	1,4	4,2	1,6	0,0	103	99	5.02622e-06	0.000612322	0.194,0.658	1.0,1.0	-0.574
7967	ENSMUSG00000047656.9	Trpt1	chr19	+	6997981	6998366	6998191	6998366	6996695	6996777	7967	0,2	4,5	11,10	6,1	198	99	8.1751e-05	0.00589467	0.0,0.167	0.478,0.833	-0.572
6438	ENSMUSG00000019823.17	Mical1	chr10	+	41479325	41479499	41479394	41479499	41478962	41479067	6438	0,0	2,2	5,3	3,1	168	99	2.22412e-06	0.000308307	0.0,0.0	0.495,0.639	-0.567
34718	ENSMUSG00000035597.19	Prpf39	chr12	+	65051462	65051758	65051606	65051758	65048112	65048280	34718	1,0	2,2	3,1	0,1	198	99	8.68106e-05	0.00613288	0.2,0.0	1.0,0.333	-0.567
26385	ENSMUSG00000109771.1	Gm35315	chr5	-	110086924	110087012	110086924	110087009	110094330	110094420	26385	1,0	4,1	11,3	0,6	102	99	0.000214704	0.0127177	0.195,0.0	1.0,0.327	-0.566
36383	ENSMUSG00000058594.15	Fbh1	chr2	-	11748936	11749116	11748936	11749112	11749530	11749606	36383	0,2	4,4	2,8	1,2	103	99	0.000285426	0.0157013	0.0,0.325	0.658,0.794	-0.564
19940	ENSMUSG00000035620.15	Ric8b	chr10	+	85008656	85008793	85008693	85008793	85001781	85001901	19940	5,2	3,3	12,13	0,0	136	99	8.68874e-07	0.000141455	0.548,0.327	1.0,1.0	-0.562
32025	ENSMUSG00000028676.17	Srsf10	chr4	+	135861737	135861877	135861780	135861877	135858841	135859201	32025	7,10	10,17	28,19	3,2	142	99	8.68126e-09	2.45474e-06	0.328,0.291	0.867,0.869	-0.558
17900	ENSMUSG00000019461.12	Plscr3	chr11	+	69849882	69850173	69850017	69850173	69848213	69848375	17900	0,4	7,3	6,2	0,1	198	99	9.4376e-05	0.00657633	0.0,0.4	1.0,0.5	-0.55
33447	ENSMUSG00000020290.14	Xpo1	chr11	+	23268607	23268690	23268660	23268690	23267661	23267763	33447	3,5	5,2	2,3	0,0	152	99	6.58003e-07	0.000110473	0.281,0.62	1.0,1.0	-0.549
15576	ENSMUSG00000024858.14	Grk2	chr19	-	4287557	4287931	4287557	4287919	4288411	4288507	15576	4,7	8,4	4,2	0,0	111	99	1.52982e-06	0.000223341	0.308,0.609	1.0,1.0	-0.541
12935	ENSMUSG00000087556.1	Gm15764	chr16	+	18421659	18421997	18421679	18421997	18421168	18421287	12935	0,0	3,7	2,2	1,2	119	99	0.000309356	0.0167542	0.0,0.0	0.625,0.454	-0.539
31086	ENSMUSG00000025402.12	Nab2	chr10	-	127664924	127665032	127664924	127665029	127666375	127666710	31086	0,1	11,1	2,4	0,3	102	99	0.000143526	0.00919059	0.0,0.493	1.0,0.564	-0.536
34688	ENSMUSG00000098843.1	Gm27240	chr9	-	32709651	32709936	32709651	32709885	32710672	32710839	34688	3,1	3,1	10,6	1,0	150	99	0.000193125	0.0116277	0.398,0.398	0.868,1.0	-0.536
2318	ENSMUSG00000078517.12	Emc1	chr4	+	139364922	139365394	139365194	139365394	139364330	139364339	2318	38,25	72,32	61,53	8,8	198	99	0	0	0.209,0.281	0.792,0.768	-0.535
38958	ENSMUSG00000026857.9	Ntmt1	chr2	+	30808206	30808365	30808322	30808365	30807993	30808083	38958	13,3	6,2	3,12	0,0	198	99	1.42094e-06	0.000214683	0.52,0.429	1.0,1.0	-0.525
39459	ENSMUSG00000029439.14	Sfswap	chr5	+	129559449	129559608	129559468	129559608	129554442	129554708	39459	3,1	23,27	10,6	4,5	118	99	1.17092e-07	2.44776e-05	0.099,0.03	0.677,0.502	-0.525
11106	ENSMUSG00000023007.15	Prpf40b	chr15	+	99310641	99310846	99310658	99310846	99309943	99310035	11106	2,1	3,3	1,2	0,1	116	99	0.00124834	0.0489542	0.363,0.221	1.0,0.631	-0.524
56584	ENSMUSG00000041064.13	Pif1	chr9	+	65591813	65592230	65592123	65592230	65589947	65590054	56584	5,3	7,7	14,7	3,1	198	99	0.000170962	0.0105695	0.263,0.176	0.7,0.778	-0.519
7799	ENSMUSG00000024940.11	Ltbp3	chr19	+	5755655	5756099	5755931	5756099	5753928	5754048	7799	4,13	3,5	8,6	0,0	198	99	7.64555e-07	0.000125999	0.4,0.565	1.0,1.0	-0.518
1045	ENSMUSG00000021240.6	Abcd4	chr12	-	84612324	84612583	84612324	84612445	84612779	84612896	1045	7,4	4,2	28,11	0,0	198	99	1.74676e-06	0.000250921	0.467,0.5	1.0,1.0	-0.516
13926	ENSMUSG00000021576.6	Pdcd6	chr13	-	74303721	74304164	74303721	74303959	74305540	74305838	13926	1,3	5,1	5,6	1,0	198	99	0.000140371	0.0090425	0.091,0.6	0.714,1.0	-0.512
32418	ENSMUSG00000087230.10	Mroh3	chr1	-	136199522	136199611	136199522	136199607	136200342	136200478	32418	2,2	2,2	5,3	0,0	103	99	0.000143199	0.00918063	0.49,0.49	1.0,1.0	-0.51
25637	ENSMUSG00000028359.4	Orm3	chr4	+	63356466	63356639	63356570	63356639	63356161	63356313	25637	3,3	3,2	7,5	1,0	198	99	0.000221252	0.0130337	0.333,0.429	0.778,1.0	-0.508
32197	ENSMUSG00000057133.14	Chd6	chr2	-	160969338	160969555	160969338	160969550	160977458	160977519	32197	5,5	4,6	3,1	0,0	104	99	3.13456e-06	0.000412756	0.543,0.442	1.0,1.0	-0.507
38960	ENSMUSG00000026857.9	Ntmt1	chr2	+	30808219	30808365	30808322	30808365	30807993	30808083	38960	15,3	6,2	4,9	0,0	198	99	1.61118e-06	0.000232689	0.556,0.429	1.0,1.0	-0.507
8512	ENSMUSG00000024404.7	Riok3	chr18	+	12155198	12155258	12155223	12155258	12153912	12154020	8512	6,1	4,1	3,1	0,0	124	99	4.65565e-05	0.00376694	0.545,0.444	1.0,1.0	-0.505
23984	ENSMUSG00000025190.13	Got1	chr19	-	43504521	43504895	43504521	43504687	43506921	43507026	23984	3,1	1,4	18,9	1,1	198	99	0.000989007	0.0414142	0.6,0.111	0.9,0.818	-0.504
42225	ENSMUSG00000049728.14	Zfp668	chr7	-	127873769	127873927	127873769	127873923	127874676	127874758	42225	7,1	5,5	4,3	0,1	103	99	0.000280262	0.0155318	0.574,0.161	1.0,0.742	-0.504
23033	ENSMUSG00000028873.16	Cdca8	chr4	-	124919110	124919401	124919110	124919293	124919612	124919699	23033	0,1	4,0	2,2	0,0	198	99	0.000116868	0.00777665	0.0,1.0	1.0,1.0	-0.5
25883	ENSMUSG00000039865.8	Slc44a3	chr3	-	121509373	121509560	121509373	121509449	121510191	121510316	25883	0,1	3,0	2,2	0,0	198	99	0.000246191	0.0141619	0.0,1.0	1.0,1.0	-0.5
28536	ENSMUSG00000024937.15	Ehbp1l1	chr19	-	5708325	5708668	5708325	5708425	5708757	5708831	28536	8,2	2,2	12,8	0,0	198	99	0.000387491	0.0201725	0.667,0.333	1.0,1.0	-0.5
30840	ENSMUSG00000022771.17	Ppil2	chr16	-	17107178	17107443	17107178	17107254	17109644	17109694	30840	4,4	1,4	17,11	0,0	198	99	6.32147e-06	0.000749716	0.667,0.333	1.0,1.0	-0.5
30841	ENSMUSG00000022771.17	Ppil2	chr16	-	17107178	17107447	17107178	17107254	17109644	17109694	30841	4,4	1,4	12,12	0,0	198	99	6.344e-06	0.00075073	0.667,0.333	1.0,1.0	-0.5
35099	ENSMUSG00000026516.8	Nvl	chr1	-	181095192	181095689	181095192	181095287	181097135	181097224	35099	1,0	1,1	3,1	0,1	198	99	0.000119958	0.00793272	0.333,0.0	1.0,0.333	-0.5
37249	ENSMUSG00000112627.1	4933412E12Rik	chr10	+	116958884	116959069	116958979	116959069	116955527	116955657	37249	0,1	2,0	1,1	0,0	194	99	0.0012712	0.0496694	0.0,1.0	1.0,1.0	-0.5
41045	ENSMUSG00000032449.13	Slc25a36	chr9	-	97099081	97099179	97099081	97099165	97100074	97100239	41045	1,0	1,5	4,1	0,1	113	99	6.71998e-06	0.000781452	0.467,0.0	1.0,0.467	-0.5
41863	ENSMUSG00000027288.16	Zfp106	chr2	-	120531594	120532222	120531594	120531803	120555230	120555315	41863	0,1	3,0	1,2	0,0	198	99	0.000246202	0.0141619	0.0,1.0	1.0,1.0	-0.5
43333	ENSMUSG00000078864.10	Gm14322	chr2	+	177767738	177768131	177768043	177768131	177759287	177759375	43333	0,1	3,0	5,4	0,0	198	99	0.000246134	0.0141619	0.0,1.0	1.0,1.0	-0.5
51203	ENSMUSG00000033379.13	Atp6v0b	chr4	-	117885628	117885984	117885628	117885746	117886067	117886145	51203	0,1	2,0	1,1	0,0	198	99	0.00119564	0.0474765	0.0,1.0	1.0,1.0	-0.5
21869	ENSMUSG00000042508.16	Dmtf1	chr5	-	9121453	9121922	9121453	9121462	9124441	9124527	21869	5,4	5,2	19,12	2,0	198	99	0.000207164	0.0123255	0.333,0.5	0.826,1.0	-0.497
26510	ENSMUSG00000060166.6	Zdhhc8	chr16	-	18227031	18227473	18227031	18227188	18227775	18227878	26510	17,10	7,8	50,23	2,0	198	99	1.69445e-07	3.40953e-05	0.548,0.385	0.926,1.0	-0.497
28881	ENSMUSG00000039693.11	Msantd3	chr4	+	48549921	48549997	48549924	48549997	48540078	48540271	28881	3,3	6,8	7,10	1,4	102	99	0.00061082	0.0287358	0.327,0.267	0.872,0.708	-0.493
32415	ENSMUSG00000087230.10	Mroh3	chr1	-	136182717	136182951	136182717	136182777	136183319	136183422	32415	0,0	1,1	10,9	8,3	198	99	2.9112e-05	0.00262778	0.0,0.0	0.385,0.6	-0.492
41974	ENSMUSG00000031834.15	Pik3r2	chr8	-	70770583	70770969	70770583	70770940	70771053	70771162	41974	3,5	7,3	5,5	1,0	128	99	9.93864e-05	0.00685434	0.249,0.563	0.795,1.0	-0.491
37554	ENSMUSG00000068739.13	Sars	chr3	-	108431464	108431706	108431464	108431596	108433017	108433161	37554	4,1	7,10	6,6	1,3	198	99	0.000932311	0.0397527	0.222,0.048	0.75,0.5	-0.49
2967	ENSMUSG00000078902.3	Gm14443	chr2	-	175166254	175170460	175166254	175167159	175171594	175171655	2967	3,6	4,1	4,2	0,0	198	99	1.95548e-05	0.00194552	0.273,0.75	1.0,1.0	-0.488
15463	ENSMUSG00000035021.13	Baz1a	chr12	-	54923039	54923471	54923039	54923264	54927563	54927713	15463	5,3	33,16	8,8	1,8	198	99	0.000384733	0.0200873	0.07,0.086	0.8,0.333	-0.488
35207	ENSMUSG00000044328.13	Trp53i13	chr11	-	77512652	77513025	77512652	77512896	77513159	77513370	35207	15,14	13,10	10,22	1,1	198	99	2.87213e-06	0.000383844	0.366,0.412	0.833,0.917	-0.486
45649	ENSMUSG00000049960.4	Mrps16	chr14	-	20393177	20393372	20393177	20393271	20393480	20393634	45649	2,5	3,2	6,7	0,1	198	99	0.000357418	0.0188813	0.25,0.556	1.0,0.778	-0.486
55506	ENSMUSG00000032485.14	Scap	chr9	+	110374173	110374636	110374509	110374636	110373389	110373495	55506	6,3	2,2	14,9	0,0	198	99	0.000242677	0.0140041	0.6,0.429	1.0,1.0	-0.486
5269	ENSMUSG00000040940.18	Arhgef1	chr7	+	24918519	24919351	24919183	24919351	24917894	24918000	5269	5,5	7,9	3,11	1,1	198	99	0.000278422	0.0154847	0.263,0.217	0.6,0.846	-0.483
38961	ENSMUSG00000026857.9	Ntmt1	chr2	+	30808229	30808365	30808322	30808365	30807993	30808083	38961	13,4	6,2	8,10	0,0	192	99	2.3502e-06	0.000323756	0.528,0.508	1.0,1.0	-0.482
54980	ENSMUSG00000055835.10	Zfp1	chr8	+	111666057	111666204	111666060	111666204	111658385	111658441	54980	3,1	26,10	8,2	4,2	102	99	4.78957e-05	0.00384633	0.101,0.088	0.66,0.493	-0.482
37120	ENSMUSG00000026193.15	Fn1	chr1	-	71613762	71613873	71613762	71613858	71615359	71615551	37120	10,11	10,7	1,1	0,0	114	99	5.73488e-05	0.00441413	0.465,0.577	1.0,1.0	-0.479
24489	ENSMUSG00000028345.15	Tex10	chr4	-	48468280	48468748	48468280	48468465	48469883	48470072	24489	3,5	3,1	3,5	0,0	198	99	0.000269225	0.015114	0.333,0.714	1.0,1.0	-0.477
35320	ENSMUSG00000038886.10	Man2a2	chr7	-	80358909	80359008	80358909	80359004	80359279	80359394	35320	2,4	3,2	2,1	0,0	103	99	3.14492e-05	0.00276532	0.391,0.658	1.0,1.0	-0.476
15419	ENSMUSG00000021000.17	Mia2	chr12	+	59162844	59163019	59162925	59163019	59160175	59160266	15419	3,6	4,1	3,10	0,0	180	99	3.11065e-05	0.00275398	0.292,0.767	1.0,1.0	-0.471
22450	ENSMUSG00000021906.14	Oxnad1	chr14	+	32094216	32094361	32094265	32094361	32092067	32092131	22450	3,3	3,1	1,1	0,0	148	99	0.000298164	0.0162628	0.401,0.667	1.0,1.0	-0.466
44841	ENSMUSG00000004846.10	Plod3	chr5	+	136993910	136993986	136993980	136993986	136993208	136993313	44841	3,4	3,1	1,9	0,0	169	99	0.000312045	0.0168658	0.369,0.701	1.0,1.0	-0.465
51956	ENSMUSG00000024817.13	Uhrf2	chr19	+	30086150	30086316	30086295	30086316	30082733	30082840	51956	2,8	1,3	10,5	0,0	198	99	0.0002373	0.0137233	0.5,0.571	1.0,1.0	-0.465
39997	ENSMUSG00000038759.15	Nup205	chr6	+	35245504	35245579	35245508	35245579	35245247	35245376	39997	3,2	4,1	11,1	0,0	103	99	2.20056e-05	0.00211573	0.419,0.658	1.0,1.0	-0.462
6841	ENSMUSG00000008682.13	Rpl10	chrX	+	74272929	74273025	74272947	74273025	74272671	74272834	6841	3,2	1,3	4,2	0,0	117	99	0.000528509	0.0258128	0.717,0.361	1.0,1.0	-0.461
4652	ENSMUSG00000019178.17	Styxl1	chr5	-	135770255	135770362	135770255	135770359	135778250	135778291	4652	3,3	3,2	4,6	0,0	102	99	5.15776e-05	0.00406903	0.493,0.593	1.0,1.0	-0.457
33832	ENSMUSG00000024160.16	Spsb3	chr17	+	24890551	24890941	24890832	24890941	24890282	24890460	33832	13,4	6,4	21,19	0,3	198	99	0.000962274	0.0407393	0.52,0.333	1.0,0.76	-0.454
901	ENSMUSG00000005899.14	Smpd4	chr16	+	17638379	17638641	17638495	17638641	17635481	17635568	901	10,10	54,55	38,33	23,10	198	99	2.35012e-12	1.66132e-09	0.085,0.083	0.452,0.623	-0.453
33113	ENSMUSG00000036948.17	Map11	chr5	-	138262169	138262510	138262169	138262317	138262657	138262744	33113	17,5	6,3	46,36	0,1	198	99	4.09615e-07	7.36005e-05	0.586,0.455	1.0,0.947	-0.453
38889	ENSMUSG00000054766.13	Set	chr2	+	30062052	30062280	30062133	30062280	30061753	30061813	38889	8,5	2,4	2,3	0,0	180	99	6.62224e-06	0.000775119	0.688,0.407	1.0,1.0	-0.453
51947	ENSMUSG00000024817.13	Uhrf2	chr19	+	30085990	30086316	30086295	30086316	30082733	30082840	51947	2,9	1,3	8,6	0,0	198	99	0.00043209	0.0221508	0.5,0.6	1.0,1.0	-0.45
51954	ENSMUSG00000024817.13	Uhrf2	chr19	+	30086009	30086316	30086295	30086316	30082733	30082840	51954	2,9	1,3	8,5	0,0	198	99	0.000437675	0.0223518	0.5,0.6	1.0,1.0	-0.45
53996	ENSMUSG00000007888.15	Crlf1	chr8	+	70500866	70501278	70501109	70501278	70499329	70499499	53996	12,8	4,4	15,10	0,0	198	99	1.47706e-06	0.000218609	0.6,0.5	1.0,1.0	-0.45
5968	ENSMUSG00000056608.14	Chd9	chr8	+	91034904	91035065	91034907	91035065	91033338	91034244	5968	21,20	13,18	6,2	0,0	102	99	5.19737e-06	0.000630314	0.611,0.519	1.0,1.0	-0.435
18202	ENSMUSG00000020441.6	2310033P09Rik	chr11	+	59210269	59210738	59210271	59210738	59209972	59210104	18202	3,5	4,2	4,4	0,0	101	99	1.58607e-05	0.00162618	0.424,0.71	1.0,1.0	-0.433
20324	ENSMUSG00000109783.1	Gm45338	chr16	+	23554676	23554933	23554697	23554933	23527494	23527606	20324	0,0	5,1	9,2	4,6	120	99	1.08114e-05	0.00117105	0.0,0.0	0.65,0.216	-0.433
5111	ENSMUSG00000035632.16	Cnot3	chr7	+	3653144	3653419	3653196	3653419	3652032	3652128	5111	3,1	64,57	24,19	17,17	151	99	0	0	0.03,0.011	0.481,0.423	-0.431
39458	ENSMUSG00000029439.14	Sfswap	chr5	+	129559346	129559608	129559468	129559608	129554442	129554708	39458	3,3	23,27	12,6	4,5	198	99	1.47501e-06	0.000218609	0.061,0.053	0.6,0.375	-0.43
53998	ENSMUSG00000007888.15	Crlf1	chr8	+	70500970	70501278	70501109	70501278	70499329	70499499	53998	12,10	4,4	14,9	0,0	198	99	3.43516e-06	0.000445782	0.6,0.556	1.0,1.0	-0.422
54282	ENSMUSG00000031684.11	Slc10a7	chr8	+	78698429	78698571	78698522	78698571	78697173	78697331	54282	16,5	1,7	8,11	0,0	192	99	6.63842e-05	0.00497419	0.892,0.269	1.0,1.0	-0.419
35841	ENSMUSG00000009995.17	Taz	chrX	+	74288940	74289019	74288983	74289019	74288661	74288714	35841	6,8	3,5	25,19	1,0	142	99	4.62944e-06	0.000569146	0.582,0.527	0.946,1.0	-0.418
51942	ENSMUSG00000024817.13	Uhrf2	chr19	+	30085935	30086316	30086295	30086316	30082733	30082840	51942	3,8	1,3	9,5	0,0	198	99	0.000285531	0.0157013	0.6,0.571	1.0,1.0	-0.415
51951	ENSMUSG00000024817.13	Uhrf2	chr19	+	30086006	30086316	30086295	30086316	30082733	30082840	51951	3,8	1,3	8,5	0,0	198	99	0.000296451	0.0162023	0.6,0.571	1.0,1.0	-0.415
33697	ENSMUSG00000055991.15	Zkscan5	chr5	+	145212488	145212640	145212507	145212640	145211745	145211828	33697	7,5	6,2	5,1	0,0	118	99	3.88739e-06	0.000491412	0.495,0.677	1.0,1.0	-0.414
995	ENSMUSG00000037466.13	Tedc1	chr12	+	113157470	113157727	113157577	113157727	113157160	113157363	995	20,12	126,86	57,41	21,32	198	99	6.66134e-15	7.01726e-12	0.074,0.065	0.576,0.39	-0.413
6079	ENSMUSG00000024963.12	Dnajc4	chr19	-	6990717	6990831	6990717	6990811	6992548	6992572	6079	0,0	1,2	5,2	7,2	119	99	5.26679e-05	0.00414895	0.0,0.0	0.373,0.454	-0.413
56470	ENSMUSG00000022404.8	Slc25a17	chr15	-	81327040	81327409	81327040	81327348	81329049	81329166	56470	0,1	2,1	6,3	3,1	160	99	0.00073107	0.0333419	0.0,0.382	0.553,0.65	-0.411
52383	ENSMUSG00000053877.12	Srcap	chr7	+	127519656	127519832	127519659	127519832	127519580	127519602	52383	5,4	3,3	10,3	0,0	102	99	3.76143e-05	0.00321276	0.618,0.564	1.0,1.0	-0.409
45335	ENSMUSG00000025574.13	Tk1	chr11	-	117825211	117825500	117825211	117825235	117825600	117825632	45335	9,12	7,3	11,14	0,1	198	99	6.63057e-05	0.00497419	0.391,0.667	1.0,0.875	-0.408
5309	ENSMUSG00000037552.17	Plekhg2	chr7	-	28370237	28371042	28370237	28370497	28371114	28371245	5309	32,31	68,50	71,45	18,17	198	99	7.5735e-12	5.02329e-09	0.19,0.237	0.664,0.57	-0.403
34445	ENSMUSG00000036281.13	Snapc4	chr2	-	26373318	26373701	26373318	26373466	26374020	26374185	34445	15,25	141,84	74,42	32,26	198	99	0	0	0.051,0.13	0.536,0.447	-0.401
49297	ENSMUSG00000051768.9	Xrcc1	chr7	+	24566366	24566500	24566391	24566500	24566218	24566293	49297	9,12	26,18	15,8	4,4	124	99	0.00022528	0.013242	0.217,0.347	0.75,0.615	-0.401
57293	ENSMUSG00000027575.19	Arfgap1	chr2	+	180978013	180978441	180978411	180978441	180977319	180977352	57293	13,11	3,6	52,15	1,0	198	99	2.72038e-06	0.000369305	0.684,0.478	0.963,1.0	-0.401
54111	ENSMUSG00000046295.13	Ankle1	chr8	+	71407618	71407749	71407646	71407749	71406861	71406973	54111	1,2	12,4	11,4	5,3	127	99	0.000375224	0.0196672	0.061,0.28	0.632,0.51	-0.4
34446	ENSMUSG00000036281.13	Snapc4	chr2	-	26373318	26373707	26373318	26373466	26374020	26374185	34446	15,26	141,84	74,42	32,26	198	99	0	0	0.051,0.134	0.536,0.447	-0.399
47720	ENSMUSG00000036054.15	Sugp2	chr8	+	70261008	70261317	70261230	70261317	70260468	70260589	47720	27,35	79,56	60,61	23,19	198	99	6.8745e-13	5.35265e-10	0.146,0.238	0.566,0.616	-0.399
5308	ENSMUSG00000037552.17	Plekhg2	chr7	-	28370237	28371042	28370237	28370494	28371114	28371245	5308	35,34	42,53	71,45	8,21	198	99	3.42872e-05	0.00297459	0.294,0.243	0.816,0.517	-0.398
35846	ENSMUSG00000009995.17	Taz	chrX	+	74289128	74289348	74289298	74289348	74288661	74288714	35846	11,5	3,2	48,33	0,0	198	99	3.93595e-05	0.00332482	0.647,0.556	1.0,1.0	-0.398
2865	ENSMUSG00000046822.13	Slc39a3	chr10	-	81034917	81035009	81034917	81035005	81036987	81037250	2865	4,7	5,2	1,1	0,0	103	99	2.1605e-05	0.00209517	0.435,0.771	1.0,1.0	-0.397
39200	ENSMUSG00000023991.16	Foxp4	chr17	-	47880769	47880844	47880769	47880841	47888124	47888220	39200	2,9	3,2	8,3	0,0	102	99	0.000265752	0.0149817	0.393,0.814	1.0,1.0	-0.397
56680	ENSMUSG00000029089.8	5730480H06Rik	chr5	+	48397726	48397820	48397771	48397820	48396663	48396701	56680	3,5	1,3	7,17	0,0	144	99	0.000528404	0.0258128	0.673,0.534	1.0,1.0	-0.396
12320	ENSMUSG00000013236.17	Ptprs	chr17	-	56424879	56425162	56424879	56424977	56425326	56425926	12320	144126	576588	165132	76,74	198	99	0	0	0.111,0.097	0.521,0.471	-0.392
22378	ENSMUSG00000029003.11	Mad2l2	chr4	+	148144668	148145120	148145103	148145120	148144263	148144358	22378	9,12	3,7	29,22	0,2	198	99	4.15545e-05	0.00347744	0.6,0.462	1.0,0.846	-0.392
36520	ENSMUSG00000021474.9	Sfxn1	chr13	+	54093530	54093618	54093552	54093618	54093000	54093086	36520	0,1	6,6	2,3	2,3	121	99	0.000522576	0.0256631	0.0,0.12	0.45,0.45	-0.39
47721	ENSMUSG00000036054.15	Sugp2	chr8	+	70261015	70261317	70261230	70261317	70260468	70260589	47721	29,35	79,56	60,59	23,19	198	99	1.14597e-12	8.36747e-10	0.155,0.238	0.566,0.608	-0.39
33114	ENSMUSG00000036948.17	Map11	chr5	-	138262169	138262514	138262169	138262317	138262657	138262744	33114	25,6	6,3	52,41	0,1	198	99	2.22658e-06	0.000308307	0.676,0.5	1.0,0.953	-0.388
38895	ENSMUSG00000054766.13	Set	chr2	+	30069314	30069557	30069517	30069557	30068959	30069102	38895	20,23	8,7	82,47	2,0	198	99	1.5688e-08	4.07167e-06	0.556,0.622	0.953,1.0	-0.387
51478	ENSMUSG00000027247.16	Arhgap1	chr2	+	91651498	91651823	91651748	91651823	91650221	91650252	51478	51,21	49,32	31,36	6,10	198	99	1.46576e-06	0.000218138	0.342,0.247	0.721,0.643	-0.387
27517	ENSMUSG00000057229.11	Dmac2	chr7	+	25621972	25622387	25622343	25622387	25621423	25621512	27517	7,2	1,3	8,4	1,0	198	99	0.000667515	0.0308891	0.778,0.25	0.8,1.0	-0.386
23743	ENSMUSG00000024392.17	Bag6	chr17	+	35142559	35142839	35142726	35142839	35142306	35142384	23743	63,65	85,83	68,70	22,14	198	99	8.31941e-11	4.21661e-08	0.27,0.281	0.607,0.714	-0.385
11153	ENSMUSG00000003352.14	Cacnb3	chr15	+	98640963	98641257	98641176	98641257	98640688	98640750	11153	32,46	46,54	54,38	15,9	198	99	6.07752e-09	1.79404e-06	0.258,0.299	0.643,0.679	-0.383
23738	ENSMUSG00000024392.17	Bag6	chr17	+	35142484	35142839	35142726	35142839	35142306	35142384	23738	61,57	85,83	62,66	22,14	198	99	2.77674e-10	1.21285e-07	0.264,0.256	0.585,0.702	-0.383
23742	ENSMUSG00000024392.17	Bag6	chr17	+	35142514	35142839	35142726	35142839	35142306	35142384	23742	62,60	85,83	62,70	22,14	198	99	7.79882e-10	3.07829e-07	0.267,0.265	0.585,0.714	-0.383
57657	ENSMUSG00000038775.14	Vill	chr9	+	119069859	119070349	119070277	119070349	119068311	119068456	57657	22,25	20,9	50,33	0,7	198	99	0.000320323	0.0172959	0.355,0.581	1.0,0.702	-0.383
12124	ENSMUSG00000022412.14	Mief1	chr15	+	80234310	80234780	80234681	80234780	80234079	80234163	12124	6,7	2,2	33,17	0,0	198	99	0.000266702	0.0150037	0.6,0.636	1.0,1.0	-0.382
34657	ENSMUSG00000026785.14	Pkn3	chr2	+	30083063	30083382	30083238	30083382	30082815	30082962	34657	7,6	2,2	17,12	0,0	198	99	0.000280064	0.0155318	0.636,0.6	1.0,1.0	-0.382
1858	ENSMUSG00000063077.14	Kif1b	chr4	-	149257869	149258081	149257869	149258003	149261159	149261201	1858	28,10	31,26	19,13	4,6	177	99	0.000555197	0.0268237	0.336,0.177	0.727,0.548	-0.381
13813	ENSMUSG00000049658.13	Bdp1	chr13	-	100078733	100078797	100078733	100078748	100084140	100084195	13813	9,6	3,3	6,1	0,0	148	99	2.44585e-05	0.00227304	0.667,0.572	1.0,1.0	-0.381
28533	ENSMUSG00000034684.12	Sema3f	chr9	-	107687948	107688331	107687948	107688088	107689685	107689917	28533	7,20	5,2	9,6	0,0	198	99	3.06503e-05	0.00273083	0.412,0.833	1.0,1.0	-0.378
35844	ENSMUSG00000009995.17	Taz	chrX	+	74288940	74289348	74289298	74289348	74288661	74288714	35844	11,6	3,2	49,35	0,0	198	99	3.32147e-05	0.00289685	0.647,0.6	1.0,1.0	-0.377
38682	ENSMUSG00000032253.13	Phip	chr9	-	82974673	82975144	82974673	82974733	82975251	82975516	38682	16,11	4,4	21,13	0,0	198	99	4.21502e-06	0.000524195	0.667,0.579	1.0,1.0	-0.377
52503	ENSMUSG00000039199.6	Zdhhc1	chr8	-	105476023	105476409	105476023	105476136	105477016	105477118	52503	1,0	0,8	6,7	1,0	198	99	0.00014828	0.0094276	1.0,0.0	0.75,1.0	-0.375
56731	ENSMUSG00000032350.9	Gclc	chr9	+	77781206	77781367	77781269	77781367	77781083	77781142	56731	6,5	2,2	6,2	0,0	162	99	0.000655011	0.0303366	0.647,0.604	1.0,1.0	-0.375
1816	ENSMUSG00000029068.16	Ccnl2	chr4	+	155818538	155820428	155820328	155820428	155817922	155817987	1816	337313	271228	943691	123121	198	99	0	0	0.383,0.407	0.793,0.741	-0.372
44843	ENSMUSG00000004846.10	Plod3	chr5	+	136993910	136994289	136994202	136994289	136993208	136993313	44843	43,46	30,39	18,25	2,5	198	99	7.74613e-05	0.00562597	0.417,0.371	0.818,0.714	-0.372
39061	ENSMUSG00000002546.16	Golga2	chr2	+	32305182	32305295	32305212	32305295	32304958	32305034	39061	12,11	7,8	13,6	0,1	129	99	2.09874e-05	0.00205382	0.568,0.513	1.0,0.822	-0.371
27135	ENSMUSG00000028073.15	Pear1	chr3	-	87758339	87758546	87758339	87758417	87759093	87759194	27135	1,0	10,14	4,4	5,2	198	99	2.30522e-05	0.00218427	0.048,0.0	0.286,0.5	-0.369
54457	ENSMUSG00000060038.14	Dhps	chr8	+	85073502	85073746	85073680	85073746	85072451	85072616	54457	14,15	10,5	53,37	1,5	198	99	0.000167754	0.0103951	0.412,0.6	0.964,0.787	-0.369
54454	ENSMUSG00000060038.14	Dhps	chr8	+	85073272	85073746	85073680	85073746	85072451	85072616	54454	14,15	10,5	53,36	1,5	198	99	0.000191898	0.0115879	0.412,0.6	0.964,0.783	-0.367
5172	ENSMUSG00000085795.8	Zfp703	chr8	+	26978234	26978395	26978261	26978395	26977324	26977611	5172	8,4	5,3	5,3	1,0	126	99	0.000749386	0.0338895	0.557,0.512	0.797,1.0	-0.364
34658	ENSMUSG00000026785.14	Pkn3	chr2	+	30083087	30083382	30083238	30083382	30082815	30082962	34658	7,7	2,2	17,12	0,0	198	99	0.000356116	0.0188496	0.636,0.636	1.0,1.0	-0.364
54119	ENSMUSG00000034863.9	Ano8	chr8	-	71478720	71479055	71478720	71478831	71479150	71479342	54119	21,7	5,3	32,32	1,0	198	99	1.54114e-05	0.00158789	0.677,0.538	0.941,1.0	-0.363
55519	ENSMUSG00000036036.15	Zfp57	chr17	+	37004473	37004903	37004796	37004903	37003285	37003315	55519	45,31	148126	154112	69,72	198	99	0	0	0.132,0.11	0.527,0.438	-0.362
51025	ENSMUSG00000038943.16	Prc1	chr7	+	80313445	80313568	80313526	80313568	80313031	80313131	51025	10,8	59,38	16,11	11,7	180	99	1.2728e-07	2.65043e-05	0.085,0.104	0.444,0.464	-0.36
17036	ENSMUSG00000020863.15	Luc7l3	chr11	-	94292773	94293055	94292773	94293027	94293137	94293278	17036	0,0	2,1	3,7	6,7	127	99	2.37826e-05	0.00222212	0.0,0.0	0.28,0.438	-0.359
20553	ENSMUSG00000022178.11	Ajuba	chr14	-	54570244	54570402	54570244	54570296	54571600	54571663	20553	15,14	10,6	25,19	1,3	198	99	0.00072379	0.0330379	0.429,0.538	0.926,0.76	-0.359
45688	ENSMUSG00000045983.16	Eif4g1	chr16	+	20673911	20674314	20674227	20674314	20673598	20673655	45688	68,53	60,88	85,76	37,11	198	99	3.68132e-05	0.00315941	0.362,0.231	0.535,0.776	-0.359
45690	ENSMUSG00000045983.16	Eif4g1	chr16	+	20673919	20674314	20674227	20674314	20673598	20673655	45690	68,53	60,88	84,77	37,11	198	99	4.44058e-05	0.00364229	0.362,0.231	0.532,0.778	-0.359
53841	ENSMUSG00000025404.15	R3hdm2	chr10	+	127492314	127492738	127492589	127492738	127487774	127487875	53841	11,14	3,4	8,6	0,0	198	99	2.29587e-05	0.00217925	0.647,0.636	1.0,1.0	-0.359
57812	ENSMUSG00000090112.8	Shprh	chr10	+	11156988	11157238	11157099	11157238	11154658	11154788	57812	0,0	1,2	1,5	1,4	198	99	0.000209549	0.0124536	0.0,0.0	0.333,0.385	-0.359
41919	ENSMUSG00000056612.7	Ppp1r14b	chr19	+	6976825	6977250	6976914	6977250	6976543	6976627	41919	30,16	55,36	71,43	24,21	188	99	2.60152e-09	8.85079e-07	0.223,0.19	0.609,0.519	-0.358
55520	ENSMUSG00000036036.15	Zfp57	chr17	+	37004497	37004903	37004796	37004903	37003285	37003315	55520	45,31	148126	151111	69,72	198	99	0	0	0.132,0.11	0.522,0.435	-0.358
6234	ENSMUSG00000020175.15	Rab36	chr10	+	75049851	75049951	75049895	75049951	75048448	75048513	6234	0,1	3,3	4,4	2,6	143	99	0.00105432	0.0432724	0.0,0.188	0.581,0.316	-0.355
56577	ENSMUSG00000041064.13	Pif1	chr9	+	65589220	65589604	65589450	65589604	65589004	65589137	56577	8,11	5,1	27,12	0,0	198	99	2.37521e-05	0.00222212	0.444,0.846	1.0,1.0	-0.355
42560	ENSMUSG00000022433.19	Csnk1e	chr15	-	79438771	79439150	79438771	79438859	79442091	79442136	42560	29,23	21,14	43,25	9,2	198	99	0.000280425	0.0155318	0.408,0.451	0.705,0.862	-0.354
42608	ENSMUSG00000039678.12	Tbc1d13	chr2	+	30136867	30137223	30137120	30137223	30134796	30134870	42608	22,14	38,35	17,19	9,6	198	99	3.52351e-05	0.00304341	0.224,0.167	0.486,0.613	-0.354
14668	ENSMUSG00000037466.13	Tedc1	chr12	+	113157235	113157727	113157577	113157727	113156674	113156753	14668	18,11	6,5	56,39	0,4	198	99	0.000120545	0.00794634	0.6,0.524	1.0,0.83	-0.353
10530	ENSMUSG00000022843.17	Clcn2	chr16	-	20707418	20707732	20707418	20707457	20707842	20707916	10530	12,8	23,17	32,17	10,9	198	99	3.12131e-05	0.00275398	0.207,0.19	0.615,0.486	-0.352
20554	ENSMUSG00000022178.11	Ajuba	chr14	-	54570244	54570511	54570244	54570296	54571600	54571663	20554	21,16	10,6	37,30	1,3	198	99	8.18507e-05	0.00589467	0.512,0.571	0.949,0.833	-0.35
48013	ENSMUSG00000026858.18	Miga2	chr2	+	30383631	30384100	30383928	30384100	30382965	30383019	48013	5,4	34,11	14,19	7,13	198	99	9.62171e-07	0.000153847	0.068,0.154	0.5,0.422	-0.35
48014	ENSMUSG00000026858.18	Miga2	chr2	+	30383706	30384100	30383928	30384100	30382965	30383019	48014	5,4	34,11	14,19	7,13	198	99	9.62171e-07	0.000153847	0.068,0.154	0.5,0.422	-0.35
24745	ENSMUSG00000028453.10	Fancg	chr4	-	43004743	43005033	43004743	43005008	43005206	43005277	24745	14,9	8,6	12,16	2,0	124	99	0.000120695	0.00794647	0.583,0.545	0.827,1.0	-0.349
3685	ENSMUSG00000037366.14	Pafah2	chr4	+	134410778	134410972	134410903	134410972	134402969	134403104	3685	11,3	5,1	7,9	0,1	198	99	0.000574859	0.0275507	0.524,0.6	1.0,0.818	-0.347
47087	ENSMUSG00000030058.17	Copg1	chr6	+	87907778	87907981	87907839	87907981	87907372	87907515	47087	16,7	6,2	9,12	0,0	160	99	8.31099e-06	0.000934117	0.623,0.684	1.0,1.0	-0.347
35104	ENSMUSG00000026516.8	Nvl	chr1	-	181134791	181135060	181134791	181134986	181136872	181136930	35104	5,6	4,1	13,8	1,0	173	99	0.000855911	0.0374461	0.417,0.774	0.882,1.0	-0.346
10903	ENSMUSG00000022503.10	Nubp1	chr16	+	10421241	10421672	10421576	10421672	10420973	10421128	10903	26,24	4,10	57,56	0,0	198	99	1.45409e-08	3.81077e-06	0.765,0.545	1.0,1.0	-0.345
5960	ENSMUSG00000036879.15	Phkb	chr8	+	85843003	85843112	85843020	85843112	85840990	85841057	5960	9,14	9,2	2,9	0,0	116	99	3.22489e-05	0.00281893	0.46,0.857	1.0,1.0	-0.342
37542	ENSMUSG00000059981.12	Taok2	chr7	-	126866996	126867421	126866996	126867179	126868109	126868322	37542	20,34	90106	20,26	15,12	198	99	1.10818e-08	3.05317e-06	0.1,0.138	0.4,0.52	-0.341
20349	ENSMUSG00000035621.13	Midn	chr10	+	80151386	80151723	80151660	80151723	80149885	80150313	20349	33,22	13,6	59,34	4,0	198	99	1.54282e-05	0.00158789	0.559,0.647	0.881,1.0	-0.338
52340	ENSMUSG00000042492.12	Tbc1d10b	chr7	-	127199821	127200136	127199821	127199922	127200284	127200954	52340	16,12	3,4	14,9	0,0	198	99	1.82447e-05	0.00183557	0.727,0.6	1.0,1.0	-0.337
12125	ENSMUSG00000022412.14	Mief1	chr15	+	80234433	80234780	80234681	80234780	80234079	80234163	12125	7,9	2,2	33,15	0,0	198	99	0.000508422	0.0251519	0.636,0.692	1.0,1.0	-0.336
12906	ENSMUSG00000022185.19	Acin1	chr14	-	54650784	54651222	54650784	54650887	54651716	54651858	12906	45,33	11,13	126,85	2,3	198	99	4.28575e-09	1.3658e-06	0.672,0.559	0.969,0.934	-0.336
54125	ENSMUSG00000034863.9	Ano8	chr8	-	71484748	71485093	71484748	71484999	71485753	71485963	54125	1,0	0,5	4,1	1,0	193	99	0.000366683	0.0192948	1.0,0.0	0.672,1.0	-0.336
33989	ENSMUSG00000038685.18	Rtel1	chr2	+	181349852	181350203	181350125	181350203	181349668	181349709	33989	9,9	2,5	38,10	0,1	198	99	4.85167e-05	0.00388459	0.692,0.474	1.0,0.833	-0.334
37841	ENSMUSG00000062310.7	Glrp1	chr1	-	88503137	88503547	88503137	88503442	88509790	88510066	37841	6,4	6,0	4,4	0,0	198	99	0.00111738	0.0451703	0.333,1.0	1.0,1.0	-0.334
4872	ENSMUSG00000005069.12	Pex5	chr6	-	124413568	124413790	124413568	124413701	124414286	124414450	4872	24,22	9,6	45,35	1,1	188	99	2.64422e-06	0.000361478	0.584,0.659	0.96,0.949	-0.333
20325	ENSMUSG00000109783.1	Gm45338	chr16	+	23554694	23554933	23554697	23554933	23527494	23527606	20325	0,0	5,1	3,2	4,6	102	99	0.000228196	0.0133404	0.0,0.0	0.421,0.244	-0.333
10902	ENSMUSG00000022503.10	Nubp1	chr16	+	10421229	10421672	10421576	10421672	10420973	10421128	10902	27,26	4,10	58,55	0,0	198	99	1.84384e-08	4.62899e-06	0.771,0.565	1.0,1.0	-0.332
17951	ENSMUSG00000020894.16	Vamp2	chr11	+	69089575	69089889	69089730	69089889	69089105	69089226	17951	9,9	19,26	24,22	10,13	198	99	1.41049e-05	0.00147429	0.191,0.148	0.545,0.458	-0.332
35607	ENSMUSG00000031392.18	Irak1	chrX	-	74022472	74022777	74022472	74022661	74022848	74023065	35607	55,49	144132	85,70	35,46	198	99	9.50462e-13	7.16506e-10	0.16,0.157	0.548,0.432	-0.332
35836	ENSMUSG00000009995.17	Taz	chrX	+	74288940	74289182	74289104	74289182	74288450	74288513	35836	38,28	39,40	121109	31,39	198	99	9.38935e-09	2.64106e-06	0.328,0.259	0.661,0.583	-0.329
39045	ENSMUSG00000031320.9	Rps4x	chrX	-	102187626	102187972	102187626	102187937	102188293	102188371	39045	8,6	2,3	4,4	0,0	134	99	0.000193272	0.0116277	0.747,0.596	1.0,1.0	-0.329
1788	ENSMUSG00000062822.8	4833420G17Rik	chr13	+	119465279	119466304	119466010	119466304	119464564	119464690	1788	49,59	30,34	155,95	9,23	198	99	9.50439e-06	0.00105067	0.45,0.465	0.896,0.674	-0.328
46039	ENSMUSG00000043243.15	Fam129c	chr8	+	71605606	71605718	71605616	71605718	71604960	71605035	46039	11,6	3,4	19,12	0,0	109	99	1.50782e-05	0.00156379	0.769,0.577	1.0,1.0	-0.327
22376	ENSMUSG00000029003.11	Mad2l2	chr4	+	148144639	148145120	148145103	148145120	148144263	148144358	22376	14,14	3,7	32,23	0,2	198	99	0.00016674	0.0103562	0.7,0.5	1.0,0.852	-0.326
13924	ENSMUSG00000021576.6	Pdcd6	chr13	-	74303721	74304046	74303721	74303959	74305540	74305838	13924	9,5	5,1	12,8	1,0	186	99	0.000546341	0.0264434	0.489,0.727	0.865,1.0	-0.325
18526	ENSMUSG00000001228.14	Uhrf1	chr17	+	56305109	56305250	56305159	56305250	56303399	56303561	18526	13,7	3,3	4,5	0,0	149	99	5.64166e-05	0.00434861	0.742,0.608	1.0,1.0	-0.325
47564	ENSMUSG00000041477.14	Dcp1b	chr6	+	119217502	119217979	119217802	119217979	119214769	119215606	47564	8,5	30,18	7,14	8,5	198	99	0.00120647	0.0478004	0.118,0.122	0.304,0.583	-0.324
5498	ENSMUSG00000001909.16	Trmt1	chr8	+	84690772	84690947	84690784	84690947	84690516	84690572	5498	12,8	10,3	28,18	2,1	111	99	0.000122251	0.00801944	0.517,0.704	0.926,0.941	-0.323
32684	ENSMUSG00000057363.12	Uxs1	chr1	-	43764889	43765009	43764889	43765005	43774816	43774876	32684	5,5	4,2	9,15	1,0	103	99	0.00024881	0.0142966	0.546,0.706	0.896,1.0	-0.322
45972	ENSMUSG00000030432.12	Rpl28	chr7	+	4793760	4794177	4794049	4794177	4793592	4793626	45972	61,48	20,23	176107	11,8	198	99	6.79194e-09	1.95132e-06	0.604,0.511	0.889,0.87	-0.322
9228	ENSMUSG00000024299.17	Adamts10	chr17	+	33543393	33543781	33543635	33543781	33543197	33543305	9228	4,4	34,24	70,46	53,38	198	99	4.32079e-11	2.42407e-08	0.056,0.077	0.398,0.377	-0.321
3521	ENSMUSG00000042185.14	Nfrkb	chr9	+	31396793	31397137	31396999	31397137	31396322	31396497	3521	34,25	57,59	57,41	18,27	198	99	3.85374e-06	0.000488308	0.23,0.175	0.613,0.432	-0.32
6354	ENSMUSG00000030276.19	Ttll3	chr6	+	113394580	113394860	113394691	113394860	113393102	113393194	6354	0,0	4,9	10,4	7,7	198	99	3.57529e-06	0.00046063	0.0,0.0	0.417,0.222	-0.32
15424	ENSMUSG00000021000.17	Mia2	chr12	+	59162893	59163019	59162925	59163019	59160175	59160266	15424	7,5	4,1	3,10	0,0	131	99	0.000133584	0.00862599	0.569,0.791	1.0,1.0	-0.32
27926	ENSMUSG00000059851.15	Kmt5c	chr7	+	4742490	4742728	4742618	4742728	4742121	4742287	27926	43,23	158138	70,53	41,44	198	99	0	0	0.12,0.077	0.461,0.376	-0.32
33987	ENSMUSG00000038685.18	Rtel1	chr2	+	181349843	181350203	181350125	181350203	181349668	181349709	33987	12,8	2,5	39,10	0,1	198	99	9.512e-05	0.00659396	0.75,0.444	1.0,0.833	-0.32
50511	ENSMUSG00000030741.15	Spns1	chr7	-	126373769	126374110	126373769	126373836	126375066	126375203	50511	25,14	9,3	41,42	0,2	198	99	1.03981e-05	0.00113545	0.581,0.7	1.0,0.913	-0.316
9229	ENSMUSG00000024299.17	Adamts10	chr17	+	33543414	33543781	33543635	33543781	33543197	33543305	9229	4,4	34,24	72,42	53,38	198	99	6.87597e-11	3.62168e-08	0.056,0.077	0.404,0.356	-0.314
27091	ENSMUSG00000030309.16	Caprin2	chr6	-	148887670	148887794	148887670	148887790	148890608	148890671	27091	0,0	1,1	4,1	4,6	103	99	0.00038533	0.0200899	0.0,0.0	0.49,0.138	-0.314
54048	ENSMUSG00000000791.9	Il12rb1	chr8	+	70817208	70817346	70817211	70817346	70816883	70817039	54048	0,2	20,13	6,2	5,7	102	99	0.000648724	0.0301494	0.0,0.13	0.538,0.217	-0.312
29566	ENSMUSG00000045411.16	2410002F23Rik	chr7	+	44248039	44248295	44248251	44248295	44247250	44247416	29566	156119	147113	348264	66,92	198	99	3.71011e-10	1.55723e-07	0.347,0.345	0.725,0.589	-0.311
5073	ENSMUSG00000058290.4	Espl1	chr15	+	102296730	102296849	102296759	102296849	102296304	102296639	5073	11,17	4,9	10,11	0,1	128	99	5.91969e-05	0.00451114	0.68,0.594	1.0,0.895	-0.31
58340	ENSMUSG00000032480.17	Dhx30	chr9	-	110115035	110115211	110115035	110115155	110115490	110115582	58340	28,12	62,33	15,13	10,7	155	99	0.000199768	0.0119337	0.224,0.188	0.489,0.543	-0.31
50510	ENSMUSG00000030741.15	Spns1	chr7	-	126373769	126374025	126373769	126373836	126375066	126375203	50510	25,15	9,3	41,42	0,2	198	99	1.37559e-05	0.00144062	0.581,0.714	1.0,0.913	-0.309
22816	ENSMUSG00000073733.4	Cplane2	chr4	+	141217852	141218229	141218104	141218229	141217251	141217404	22816	0,1	13,5	6,3	5,3	198	99	2.88845e-05	0.00261249	0.0,0.091	0.375,0.333	-0.308
41784	ENSMUSG00000025534.17	Gusb	chr5	-	129993417	129993594	129993417	129993562	129997779	129997926	41784	8,5	4,2	19,9	0,1	131	99	0.000225739	0.0132525	0.602,0.654	1.0,0.872	-0.308
42558	ENSMUSG00000022433.19	Csnk1e	chr15	-	79438771	79439150	79438771	79438859	79441220	79441818	42558	29,23	11,5	43,25	1,1	198	99	1.9508e-05	0.00194447	0.569,0.697	0.956,0.926	-0.308
4456	ENSMUSG00000043587.15	Pxylp1	chr9	-	96860790	96861026	96860790	96861008	96862835	96862982	4456	8,5	1,4	13,12	0,0	117	99	0.000365585	0.0192748	0.871,0.514	1.0,1.0	-0.307
50509	ENSMUSG00000030741.15	Spns1	chr7	-	126373769	126373968	126373769	126373836	126375066	126375203	50509	28,13	9,3	36,39	0,2	198	99	2.26238e-05	0.00215126	0.609,0.684	1.0,0.907	-0.307
52363	ENSMUSG00000045251.13	Zfp688	chr7	-	127421404	127421696	127421404	127421518	127421808	127422034	52363	18,25	26,39	34,31	11,15	198	99	2.83827e-05	0.00257578	0.257,0.243	0.607,0.508	-0.307
22509	ENSMUSG00000015542.17	Nat9	chr11	-	115186748	115186837	115186748	115186834	115187098	115187262	22509	7,7	3,4	8,14	0,1	102	99	0.000266254	0.0149942	0.694,0.629	1.0,0.931	-0.304
7300	ENSMUSG00000011752.7	Pgam1	chr19	+	41915461	41915879	41915645	41915879	41912075	41912186	7300	44,34	15,20	48,37	6,3	198	99	0.000197889	0.0118524	0.595,0.459	0.8,0.86	-0.303
35838	ENSMUSG00000009995.17	Taz	chrX	+	74288963	74289182	74289104	74289182	74288450	74288513	35838	43,33	39,40	123112	31,39	198	99	7.52691e-08	1.63718e-05	0.355,0.292	0.665,0.589	-0.303
5370	ENSMUSG00000060601.13	Nr1h2	chr7	-	44551954	44552343	44551954	44552245	44552506	44552620	5370	40,43	127141	73,51	38,42	197	99	8.33145e-12	5.32865e-09	0.137,0.133	0.491,0.379	-0.3
32656	ENSMUSG00000061898.10	Rbak	chr5	-	143179485	143179642	143179485	143179545	143180548	143180775	32656	15,8	28,26	14,11	7,7	196	99	0.000571828	0.0274299	0.213,0.135	0.503,0.443	-0.299
45144	ENSMUSG00000029570.5	Lfng	chr5	+	140612261	140612656	140612502	140612656	140611849	140611898	45144	21,12	2,7	41,36	0,2	198	99	0.00053624	0.0260484	0.84,0.462	1.0,0.9	-0.299
45151	ENSMUSG00000029570.5	Lfng	chr5	+	140612334	140612656	140612502	140612656	140611849	140611898	45151	21,12	2,7	41,36	0,2	198	99	0.00053624	0.0260484	0.84,0.462	1.0,0.9	-0.299
53968	ENSMUSG00000002342.17	Tmem161a	chr8	+	70177395	70177508	70177451	70177508	70176844	70176925	53968	10,4	7,1	6,4	1,0	155	99	0.00104121	0.0429639	0.477,0.719	0.793,1.0	-0.299
54008	ENSMUSG00000007888.15	Crlf1	chr8	+	70503561	70504030	70503820	70504030	70503304	70503492	54008	26,18	43,34	26,15	12,7	198	99	8.5182e-05	0.00604545	0.232,0.209	0.52,0.517	-0.298
13424	ENSMUSG00000046873.18	Mbtps2	chrX	-	157572350	157572689	157572350	157572686	157572858	157572986	13424	12,5	5,2	6,3	0,0	102	99	9.12009e-05	0.00640492	0.7,0.708	1.0,1.0	-0.296
34719	ENSMUSG00000003813.15	Rad23a	chr8	-	84835619	84835759	84835619	84835674	84835819	84835919	34719	16,17	6,2	34,21	0,0	184	99	7.10044e-06	0.000816854	0.589,0.821	1.0,1.0	-0.295
25659	ENSMUSG00000031145.15	Prickle3	chrX	+	7663170	7663578	7663464	7663578	7659535	7659719	25659	3,8	48,32	17,6	13,6	198	99	6.7356e-07	0.000112732	0.03,0.111	0.395,0.333	-0.293
45149	ENSMUSG00000029570.5	Lfng	chr5	+	140612327	140612656	140612502	140612656	140611849	140611898	45149	19,14	2,7	42,40	0,2	198	99	0.000326302	0.0174781	0.826,0.5	1.0,0.909	-0.291
35837	ENSMUSG00000009995.17	Taz	chrX	+	74288940	74289348	74289298	74289348	74288450	74288513	35837	11,4	9,0	48,34	1,0	198	99	0.00100827	0.0419267	0.379,1.0	0.96,1.0	-0.29
48002	ENSMUSG00000118346.1	Tmem179b	chr19	-	8773289	8773705	8773289	8773424	8774334	8774467	48002	28,21	14,23	76,57	16,13	198	99	0.000608641	0.0286835	0.5,0.313	0.704,0.687	-0.289
52364	ENSMUSG00000045251.13	Zfp688	chr7	-	127421404	127421699	127421404	127421518	127421808	127422034	52364	17,27	26,39	30,30	11,15	198	99	8.69847e-05	0.00613288	0.246,0.257	0.577,0.5	-0.287
37801	ENSMUSG00000062310.7	Glrp1	chr1	-	88503042	88503541	88503042	88503442	88509790	88510066	37801	9,7	6,0	3,1	0,0	198	99	0.00102084	0.0423838	0.429,1.0	1.0,1.0	-0.285
39125	ENSMUSG00000070003.7	Ssbp4	chr8	-	70599524	70599730	70599524	70599595	70600395	70600485	39125	33,14	8,3	21,32	0,1	198	99	1.98001e-05	0.00196266	0.673,0.7	1.0,0.941	-0.284
49530	ENSMUSG00000025485.13	Ric8a	chr7	+	140857877	140858272	140857981	140858272	140857450	140857554	49530	17,11	6,1	32,21	0,0	198	99	1.61022e-05	0.00164154	0.586,0.846	1.0,1.0	-0.284
6275	ENSMUSG00000037020.16	Wdr62	chr7	-	30242745	30242935	30242745	30242877	30243042	30243141	6275	1,2	39,25	7,5	19,4	157	99	7.94456e-05	0.00576007	0.016,0.048	0.189,0.441	-0.283
9873	ENSMUSG00000033972.9	Zfp944	chr17	-	22343639	22343758	22343639	22343711	22358822	22358988	9873	0,0	5,5	4,2	5,5	146	99	8.50596e-05	0.00604474	0.0,0.0	0.352,0.213	-0.282
8362	ENSMUSG00000044201.10	Cdc25c	chr18	-	34744870	34745066	34744870	34745024	34747223	34747313	8362	0,0	4,1	5,1	5,4	141	99	0.000122207	0.00801944	0.0,0.0	0.413,0.149	-0.281
34716	ENSMUSG00000035597.19	Prpf39	chr12	+	65043665	65043877	65043714	65043877	65043326	65043357	34716	0,1	3,13	4,2	4,5	148	99	0.000525387	0.0257541	0.0,0.049	0.401,0.211	-0.281
5670	ENSMUSG00000025494.8	Sigirr	chr7	-	141094781	141095317	141094781	141094945	141096559	141096688	5670	30,25	26,19	67,86	15,25	198	99	4.40273e-05	0.00362033	0.366,0.397	0.691,0.632	-0.28
43638	ENSMUSG00000044005.13	Gls2	chr10	+	128204872	128205264	128205087	128205264	128204660	128204727	43638	12,9	2,2	36,16	0,0	198	99	0.00120518	0.0477849	0.75,0.692	1.0,1.0	-0.279
26291	ENSMUSG00000044791.16	Setd2	chr9	+	110545296	110545315	110545301	110545315	110532596	110532752	26291	14,8	5,3	8,1	0,0	104	99	7.74913e-05	0.00562597	0.727,0.717	1.0,1.0	-0.278
4717	ENSMUSG00000032827.15	Ppp1r9a	chr6	+	5134638	5134932	5134688	5134932	5134016	5134174	4717	26,10	113100	31,28	26,42	149	99	2.93188e-08	7.03192e-06	0.133,0.062	0.442,0.307	-0.277
1333	ENSMUSG00000037907.16	Ankrd13b	chr11	-	77470486	77471878	77470486	77471823	77472301	77472378	1333	94,67	56,70	49,40	7,15	154	99	0.000971209	0.040867	0.519,0.381	0.818,0.632	-0.275
36353	ENSMUSG00000031078.15	Cttn	chr7	-	144449550	144450017	144449550	144449615	144452026	144452137	36353	110102	250243	202143	100108	198	99	1.02585e-13	8.85233e-11	0.18,0.173	0.502,0.398	-0.274
36354	ENSMUSG00000031078.15	Cttn	chr7	-	144449550	144450021	144449550	144449615	144452026	144452137	36354	119114	250243	208152	100108	198	99	1.03806e-13	8.85233e-11	0.192,0.19	0.51,0.413	-0.271
17933	ENSMUSG00000059278.9	Naa38	chr11	+	69396147	69396360	69396173	69396360	69395813	69395972	17933	0,0	5,4	5,4	8,12	125	99	6.44805e-05	0.00485865	0.0,0.0	0.331,0.209	-0.27
49531	ENSMUSG00000025485.13	Ric8a	chr7	+	140857880	140858272	140857981	140858272	140857450	140857554	49531	17,14	6,1	34,20	0,0	198	99	2.92953e-05	0.00263192	0.586,0.875	1.0,1.0	-0.27
35592	ENSMUSG00000031392.18	Irak1	chrX	-	74017129	74017430	74017129	74017401	74018129	74018366	35592	9,19	5,2	10,13	0,0	128	99	0.000104555	0.00711515	0.582,0.88	1.0,1.0	-0.269
5499	ENSMUSG00000001909.16	Trmt1	chr8	+	84690772	84690947	84690801	84690947	84690516	84690572	5499	26,19	31,28	42,31	13,19	128	99	0.00103513	0.0428117	0.393,0.344	0.714,0.558	-0.268
17872	ENSMUSG00000018570.17	2810408A11Rik	chr11	-	69897465	69897740	69897465	69897492	69898102	69898410	17872	16,9	48,34	36,22	22,21	198	99	3.46466e-06	0.000448528	0.143,0.117	0.45,0.344	-0.267
18189	ENSMUSG00000036819.14	Jmjd4	chr11	+	59453808	59454059	59453877	59454059	59453510	59453645	18189	73,66	60,55	56,70	12,24	168	99	2.38867e-05	0.00222797	0.418,0.414	0.733,0.632	-0.267
3170	ENSMUSG00000031816.15	Mthfsd	chr8	-	121104391	121104558	121104391	121104505	121105717	121105831	3170	37,25	38,36	90,60	33,27	152	99	1.18372e-05	0.00126432	0.388,0.311	0.64,0.591	-0.266
33449	ENSMUSG00000020290.14	Xpo1	chr11	+	23268622	23268690	23268660	23268690	23267661	23267763	33449	14,11	5,2	7,5	0,0	137	99	7.39898e-05	0.00540096	0.669,0.799	1.0,1.0	-0.266
3990	ENSMUSG00000037266.18	Rsrp1	chr4	+	134926025	134926818	134926734	134926818	134925292	134925432	3990	403351	279213	10551005	196246	198	99	0	0	0.419,0.452	0.729,0.671	-0.264
18186	ENSMUSG00000036819.14	Jmjd4	chr11	+	59453779	59454059	59453877	59454059	59453510	59453645	18186	85,74	60,55	69,72	12,24	197	99	0.00011309	0.00757576	0.416,0.403	0.743,0.601	-0.262
20346	ENSMUSG00000035621.13	Midn	chr10	+	80151146	80151465	80151377	80151465	80149885	80150313	20346	43,46	601539	126,84	128116	198	99	0	0	0.035,0.041	0.33,0.266	-0.26
29728	ENSMUSG00000067150.6	Xpo5	chr17	+	46241539	46241890	46241725	46241890	46240814	46240922	29728	26,19	5,3	25,23	0,0	198	99	2.07991e-05	0.00203911	0.722,0.76	1.0,1.0	-0.259
1046	ENSMUSG00000021240.6	Abcd4	chr12	-	84612324	84612583	84612324	84612450	84612779	84612896	1046	5,3	36,48	25,10	15,27	198	99	2.16825e-05	0.0020989	0.065,0.03	0.455,0.156	-0.258
29725	ENSMUSG00000067150.6	Xpo5	chr17	+	46241441	46241890	46241725	46241890	46240814	46240922	29725	25,20	5,3	25,23	0,0	198	99	2.06044e-05	0.00202742	0.714,0.769	1.0,1.0	-0.258
53599	ENSMUSG00000031516.11	Dctn6	chr8	-	34104985	34105098	34104985	34105065	34106341	34106406	53599	15,7	2,3	2,6	0,0	132	99	0.000750424	0.0339079	0.849,0.636	1.0,1.0	-0.258
22593	ENSMUSG00000037791.15	Phf12	chr11	+	78024812	78025086	78024960	78025086	78023619	78023819	22593	45,38	248215	67,57	80,46	198	99	2.22045e-16	3.05881e-13	0.083,0.081	0.295,0.383	-0.257
15962	ENSMUSG00000037486.18	Asxl2	chr12	+	3476002	3476169	3476100	3476169	3474489	3474613	15962	61,42	11,7	25,21	0,0	197	99	3.075e-06	0.000406658	0.736,0.751	1.0,1.0	-0.256
30970	ENSMUSG00000078812.10	Eif5a	chr11	-	69919448	69919478	69919448	69919467	69920340	69920630	30970	12,14	4,4	12,16	0,0	110	99	3.35351e-05	0.00292005	0.73,0.759	1.0,1.0	-0.256
1401	ENSMUSG00000036819.14	Jmjd4	chr11	+	59453827	59454059	59453877	59454059	59453510	59453645	1401	67,61	60,55	55,55	12,24	149	99	0.000308688	0.0167349	0.426,0.424	0.753,0.604	-0.254
20356	ENSMUSG00000003068.16	Stk11	chr10	+	80126045	80126369	80126232	80126369	80125478	80125568	20356	31,26	21,22	64,40	20,9	198	99	0.000886076	0.0383907	0.425,0.371	0.615,0.69	-0.254
8166	ENSMUSG00000024525.7	Impa2	chr18	+	67306472	67306775	67306667	67306775	67302175	67302309	8166	0,0	4,12	8,0	4,4	198	99	0.0011188	0.0451936	0.0,0.0	0.5,0.0	-0.25
39237	ENSMUSG00000038740.9	Mvb12b	chr2	-	33873613	33873847	33873613	33873837	33874337	33874460	39237	13,6	1,4	7,13	0,0	109	99	0.00122532	0.0483336	0.922,0.577	1.0,1.0	-0.25
22985	ENSMUSG00000042446.16	Zmym4	chr4	-	126899931	126900083	126899931	126899963	126900604	126900748	22985	23,29	4,10	14,10	0,1	198	99	0.000324684	0.0174435	0.742,0.592	1.0,0.833	-0.249
4365	ENSMUSG00000039678.12	Tbc1d13	chr2	+	30135368	30135552	30135408	30135552	30134796	30134870	4365	6,8	63,47	16,10	15,23	139	99	8.47711e-05	0.00603222	0.064,0.108	0.432,0.236	-0.248
56393	ENSMUSG00000032316.8	Clk3	chr9	-	57758283	57758718	57758283	57758350	57760823	57761040	56393	18,12	32,25	48,29	23,22	198	99	0.000191963	0.0115879	0.22,0.194	0.511,0.397	-0.247
35831	ENSMUSG00000009995.17	Taz	chrX	+	74288303	74288513	74288450	74288513	74288177	74288219	35831	52,51	98,92	162151	77110	198	99	2.094e-08	5.18434e-06	0.21,0.217	0.513,0.407	-0.246
3702	ENSMUSG00000063229.15	Ldha	chr7	+	46847538	46847745	46847595	46847745	46847130	46847388	3702	117,79	53,52	185160	32,29	156	99	3.10921e-07	5.74029e-05	0.583,0.491	0.786,0.778	-0.245
35839	ENSMUSG00000009995.17	Taz	chrX	+	74288963	74289348	74289298	74289348	74288450	74288513	35839	16,9	9,0	50,37	1,0	198	99	0.000616919	0.0289214	0.471,1.0	0.962,1.0	-0.245
44589	ENSMUSG00000004929.12	Thop1	chr10	+	81077556	81078015	81077915	81078015	81076942	81077050	44589	1,0	14,16	4,2	3,7	198	99	0.000722016	0.032985	0.034,0.0	0.4,0.125	-0.245
14027	ENSMUSG00000021483.8	Cdk20	chr13	+	64437590	64438025	64437876	64438025	64437388	64437512	14027	13,6	43,39	17,23	18,20	198	99	7.30815e-06	0.000837165	0.131,0.071	0.321,0.365	-0.242
200	ENSMUSG00000024871.11	Doc2g	chr19	+	4006060	4006267	4006109	4006267	4004762	4004816	200	6,2	17,19	30,12	28,17	148	99	0.000597301	0.028348	0.191,0.066	0.417,0.321	-0.24
8027	ENSMUSG00000024871.11	Doc2g	chr19	+	4006025	4006133	4006109	4006133	4004762	4004816	8027	4,3	17,19	34,12	28,17	183	99	8.30235e-05	0.00593143	0.113,0.079	0.396,0.276	-0.24
4927	ENSMUSG00000057230.14	Aak1	chr6	+	86963992	86964225	86963995	86964225	86956258	86956572	4927	17,10	8,3	11,1	1,0	102	99	0.000821691	0.0362441	0.673,0.764	0.914,1.0	-0.239
21697	ENSMUSG00000062822.8	4833420G17Rik	chr13	+	119474064	119474194	119474112	119474194	119473832	119473956	21697	1,0	1,5	8,5	5,6	147	99	0.0009008	0.0388008	0.402,0.0	0.519,0.359	-0.238
49198	ENSMUSG00000023977.15	Ubr2	chr17	-	46980319	46980757	46980319	46980418	46981353	46981442	49198	7,15	216195	59,34	69,57	198	99	0	0	0.016,0.037	0.299,0.23	-0.238
860	ENSMUSG00000024045.6	Akap8	chr17	-	32312285	32313262	32312285	32312373	32314110	32314144	860	74,62	646566	220152	233216	198	99	0	0	0.054,0.052	0.321,0.26	-0.237
3290	ENSMUSG00000026135.17	Zfp142	chr1	-	74579324	74579927	74579324	74579618	74585383	74585697	3290	37,30	4,10	17,16	1,0	198	99	0.000303754	0.0165007	0.822,0.6	0.895,1.0	-0.237
22094	ENSMUSG00000029036.18	Atad3a	chr4	-	155750235	155750647	155750235	155750640	155750867	155750924	22094	12,4	4,1	4,5	0,0	106	99	0.00110344	0.0447305	0.737,0.789	1.0,1.0	-0.237
13574	ENSMUSG00000033111.16	3830406C13Rik	chr14	+	12301398	12301488	12301401	12301488	12301147	12301246	13574	14,15	4,8	16,14	2,0	102	99	0.000830435	0.0365398	0.773,0.645	0.886,1.0	-0.234
45539	ENSMUSG00000032827.15	Ppp1r9a	chr6	+	5134554	5134932	5134688	5134932	5134016	5134174	45539	29,13	113100	33,28	26,42	198	99	1.77627e-07	3.53445e-05	0.114,0.061	0.388,0.25	-0.232
382	ENSMUSG00000004865.16	Srpk1	chr17	-	28599470	28600456	28599470	28599869	28602687	28602853	382	80,60	17,12	191119	6,4	198	99	1.93386e-07	3.83382e-05	0.702,0.714	0.941,0.937	-0.231
34541	ENSMUSG00000010048.10	Ifrd2	chr9	+	107590775	107591110	107590931	107591110	107590504	107590662	34541	33,18	3,4	59,42	0,0	198	99	2.88581e-05	0.00261249	0.846,0.692	1.0,1.0	-0.231
53627	ENSMUSG00000031601.16	Cnot7	chr8	-	40502288	40502357	40502288	40502327	40507454	40507668	53627	0,0	23,7	1,8	13,9	129	99	9.38325e-05	0.00655547	0.0,0.0	0.056,0.406	-0.231
3550	ENSMUSG00000009995.17	Taz	chrX	+	74288928	74289019	74288983	74289019	74288661	74288714	3550	21,18	3,5	65,59	1,0	154	99	1.33268e-05	0.00140389	0.818,0.698	0.977,1.0	-0.23
5422	ENSMUSG00000063511.11	Snrnp70	chr7	-	45380716	45383184	45380716	45380818	45383803	45383885	5422	297245	27622612	921532	8171102	198	99	0	0	0.051,0.045	0.36,0.194	-0.229
35843	ENSMUSG00000009995.17	Taz	chrX	+	74288940	74289182	74289104	74289182	74288661	74288714	35843	38,30	95,87	122110	79109	198	99	1.38803e-08	3.67348e-06	0.167,0.147	0.436,0.335	-0.229
5924	ENSMUSG00000002393.14	Nr2f6	chr8	-	71378388	71378556	71378388	71378483	71380852	71380909	5924	56,49	12,18	94,53	9,2	172	99	0.000296759	0.0162026	0.729,0.61	0.857,0.938	-0.228
29176	ENSMUSG00000002014.12	Ssr4	chrX	+	73790328	73790811	73790653	73790811	73790030	73790120	29176	93,65	23,16	197150	15,6	198	99	1.50209e-06	0.000221095	0.669,0.67	0.868,0.926	-0.228
29184	ENSMUSG00000002014.12	Ssr4	chrX	+	73790407	73790811	73790653	73790811	73790030	73790120	29184	92,63	23,16	186151	15,6	198	99	1.88093e-06	0.000267336	0.667,0.663	0.861,0.926	-0.228
57141	ENSMUSG00000042286.13	Stab1	chr14	-	31146297	31146429	31146297	31146345	31146666	31146789	57141	1,4	31,41	8,3	7,10	183	99	0.000433548	0.0222044	0.017,0.05	0.382,0.14	-0.228
5369	ENSMUSG00000060601.13	Nr1h2	chr7	-	44551954	44552343	44551954	44552236	44552506	44552620	5369	47,61	156150	71,54	41,66	198	99	6.4719e-06	0.000760837	0.131,0.169	0.464,0.29	-0.227
2027	ENSMUSG00000014158.12	Trpv4	chr5	-	114628807	114629020	114628807	114628973	114629949	114630023	2027	0,2	44,41	6,3	7,16	146	99	5.07078e-05	0.00401219	0.0,0.032	0.368,0.113	-0.224
29733	ENSMUSG00000038705.13	Gmeb2	chr2	-	181264770	181265111	181264770	181265103	181265814	181265912	29733	18,18	4,8	12,14	0,1	107	99	0.000152055	0.00962086	0.806,0.676	1.0,0.928	-0.223
5872	ENSMUSG00000031626.17	Sorbs2	chr8	+	45823728	45823835	45823758	45823835	45819718	45819768	5872	62,49	11,13	2,10	0,0	129	99	0.000103796	0.0070857	0.812,0.743	1.0,1.0	-0.222
42276	ENSMUSG00000041215.16	Yeats2	chr16	+	20208418	20208577	20208431	20208577	20206083	20206245	42276	14,17	3,5	7,8	0,0	112	99	0.000103791	0.0070857	0.805,0.75	1.0,1.0	-0.222
53212	ENSMUSG00000031508.14	Ankrd10	chr8	-	11623359	11623858	11623359	11623825	11628438	11628530	53212	11,16	2,4	7,16	0,0	132	99	0.000401871	0.020837	0.805,0.75	1.0,1.0	-0.222
15465	ENSMUSG00000035021.13	Baz1a	chr12	-	54923384	54923640	54923384	54923471	54927563	54927713	15465	18,13	4,1	9,7	0,0	198	99	0.000607014	0.0286656	0.692,0.867	1.0,1.0	-0.221
29180	ENSMUSG00000002014.12	Ssr4	chrX	+	73790344	73790811	73790653	73790811	73790030	73790120	29180	95,67	23,16	190155	15,6	198	99	2.53673e-06	0.000348557	0.674,0.677	0.864,0.928	-0.221
14178	ENSMUSG00000034789.8	Rab24	chr13	-	55319879	55320236	55319879	55320205	55320311	55320374	14178	15,26	3,6	17,22	0,0	130	99	2.17827e-05	0.00210481	0.792,0.767	1.0,1.0	-0.22
18491	ENSMUSG00000036620.14	Mgat4b	chr11	+	50233293	50233657	50233463	50233657	50232944	50233075	18491	20,16	2,3	24,24	0,0	198	99	0.00094409	0.0401276	0.833,0.727	1.0,1.0	-0.22
18155	ENSMUSG00000000301.16	Pemt	chr11	-	59983442	59983558	59983442	59983554	60046339	60046489	18155	15,10	5,3	16,22	1,0	103	99	0.000188063	0.0114	0.743,0.762	0.939,1.0	-0.217
28729	ENSMUSG00000026643.16	Nmt2	chr2	+	3309466	3309611	3309487	3309611	3304811	3304947	28729	32,13	5,4	17,21	0,0	120	99	5.07038e-05	0.00401219	0.841,0.728	1.0,1.0	-0.216
1400	ENSMUSG00000036819.14	Jmjd4	chr11	+	59453791	59454059	59453877	59454059	59453510	59453645	1400	140117	60,55	88114	12,24	185	99	5.57347e-05	0.00431462	0.555,0.532	0.797,0.718	-0.214
15258	ENSMUSG00000032855.6	Pkd1	chr17	+	24587607	24588021	24587927	24588021	24587399	24587449	15258	18,15	4,1	3,3	0,0	198	99	0.000748832	0.0338895	0.692,0.882	1.0,1.0	-0.213
52168	ENSMUSG00000020827.18	Mink1	chr11	+	70606647	70607144	70606919	70607144	70606047	70606164	52168	21,23	169162	31,30	32,52	198	99	1.47055e-10	7.11758e-08	0.058,0.066	0.326,0.224	-0.213
46227	ENSMUSG00000034566.10	Atp5h	chr11	-	115418298	115418743	115418298	115418516	115419191	115419293	46227	96,71	30,41	214173	34,30	198	99	0.000363769	0.0191979	0.615,0.464	0.759,0.742	-0.211
39837	ENSMUSG00000022995.16	Enah	chr1	-	181921657	181922500	181921657	181921828	181923559	181923840	39837	16,21	4,1	9,5	0,0	198	99	0.00105093	0.0432007	0.667,0.913	1.0,1.0	-0.21
4216	ENSMUSG00000021097.15	Clmn	chr12	-	104773772	104773898	104773772	104773843	104774488	104774549	4216	2,1	63,73	2,4	5,8	154	99	0.000253521	0.0145207	0.02,0.009	0.205,0.243	-0.209
29949	ENSMUSG00000001138.13	Cnnm3	chr1	+	36520415	36520688	36520518	36520688	36520077	36520227	29949	16,11	106,83	27,20	25,40	198	99	6.38896e-07	0.00010828	0.07,0.062	0.351,0.2	-0.209
44334	ENSMUSG00000000915.15	Hip1r	chr5	+	123999467	123999907	123999770	123999907	123999041	123999128	44334	20,18	2,3	28,16	0,0	198	99	0.00119344	0.0474765	0.833,0.75	1.0,1.0	-0.209
30277	ENSMUSG00000037270.18	4932438A13Rik	chr3	+	37033261	37033401	37033264	37033401	37032364	37032526	30277	47,42	14,9	10,11	0,0	102	99	1.8999e-05	0.00190433	0.765,0.819	1.0,1.0	-0.208
44410	ENSMUSG00000029478.16	Ncor2	chr5	-	125041795	125041964	125041795	125041886	125042744	125042865	44410	32,46	7,4	28,15	0,0	177	99	4.58347e-05	0.00373445	0.719,0.865	1.0,1.0	-0.208
58329	ENSMUSG00000032480.17	Dhx30	chr9	-	110086318	110086659	110086318	110086326	110086931	110087195	58329	27,20	2,4	33,20	0,0	198	99	0.000184961	0.011243	0.871,0.714	1.0,1.0	-0.208
32343	ENSMUSG00000038607.12	Gng10	chr4	+	59035553	59035893	59035755	59035893	59035087	59035318	32343	0,0	8,2	6,1	5,13	198	99	0.000901962	0.0388008	0.0,0.0	0.375,0.037	-0.206
58073	ENSMUSG00000033629.6	Hacd3	chr9	-	65000061	65000194	65000061	65000177	65000980	65001091	58073	1,0	15,11	7,11	28,23	116	99	6.58603e-05	0.00494874	0.054,0.0	0.176,0.29	-0.206
51026	ENSMUSG00000038943.16	Prc1	chr7	+	80313445	80313568	80313529	80313568	80313031	80313131	51026	24,30	7,1	19,18	0,0	183	99	0.000173653	0.010699	0.65,0.942	1.0,1.0	-0.204
13810	ENSMUSG00000049658.13	Bdp1	chr13	-	100078658	100078752	100078658	100078748	100084140	100084195	13810	14,11	3,3	8,3	0,0	103	99	0.00106306	0.0434833	0.818,0.779	1.0,1.0	-0.202
16961	ENSMUSG00000020876.14	Snx11	chr11	-	96774440	96774642	96774440	96774495	96775373	96775433	16961	3,5	41,16	23,9	21,16	198	99	3.85597e-05	0.00328307	0.035,0.135	0.354,0.22	-0.202
631	ENSMUSG00000053411.16	Cbx7	chr15	-	79918752	79919104	79918752	79918825	79921371	79921438	631	5,9	30,25	36,24	33,31	198	99	9.46115e-05	0.0065842	0.077,0.153	0.353,0.279	-0.201
34631	ENSMUSG00000025212.17	Sfxn3	chr19	+	45050231	45050725	45050649	45050725	45049743	45049914	34631	23,21	4,3	84,47	0,2	198	99	0.000420756	0.021611	0.742,0.778	1.0,0.922	-0.201
700	ENSMUSG00000054263.12	Lifr	chr15	+	7185066	7185733	7185565	7185733	7184716	7184818	700	33,24	113121	30,34	46,29	198	99	3.58846e-06	0.000460977	0.127,0.09	0.246,0.37	-0.2
38992	ENSMUSG00000030695.16	Aldoa	chr7	-	126797638	126798126	126797638	126797776	126800287	126800447	38992	18201517	815729	9751167	197221	198	99	1.4666e-13	1.21221e-10	0.528,0.51	0.712,0.725	-0.199
54150	ENSMUSG00000031808.7	Slc27a1	chr8	+	71580459	71580876	71580701	71580876	71580144	71580214	54150	47,25	6,3	158,74	0,0	198	99	1.45986e-06	0.000217863	0.797,0.806	1.0,1.0	-0.198
54152	ENSMUSG00000031808.7	Slc27a1	chr8	+	71580510	71580876	71580701	71580876	71580144	71580214	54152	47,25	6,3	158,76	0,0	198	99	1.42256e-06	0.000214683	0.797,0.806	1.0,1.0	-0.198
12087	ENSMUSG00000014313.15	Cox6c	chr15	-	35931975	35932138	35931975	35932073	35935284	35938207	12087	17,13	4,1	32,36	0,0	164	99	0.00090626	0.0389199	0.72,0.887	1.0,1.0	-0.197
45988	ENSMUSG00000020070.18	Rufy2	chr10	+	63004613	63004776	63004656	63004776	63002256	63002280	45988	9,7	86,96	27,29	54,60	142	99	4.75166e-09	1.47562e-06	0.068,0.048	0.258,0.252	-0.197
3449	ENSMUSG00000026082.11	Rev1	chr1	-	38074314	38075023	38074314	38074443	38079289	38079398	3449	58,46	176158	114107	122103	198	99	4.03235e-11	2.30466e-08	0.141,0.127	0.318,0.342	-0.196
5669	ENSMUSG00000025494.8	Sigirr	chr7	-	141094781	141095317	141094781	141094945	141096054	141096123	5669	26,24	42,27	72101	53,45	198	99	0.00105203	0.0432114	0.236,0.308	0.404,0.529	-0.195
38991	ENSMUSG00000030695.16	Aldoa	chr7	-	126797638	126798035	126797638	126797776	126800001	126800046	38991	17901492	19851887	9641157	493601	198	99	2.84217e-14	2.72671e-11	0.311,0.283	0.494,0.49	-0.195
734	ENSMUSG00000022098.10	Bmp1	chr14	-	70507998	70508214	70507998	70508177	70508455	70508573	734	147161	11131005	198150	322293	136	99	0	0	0.088,0.104	0.309,0.271	-0.194
4406	ENSMUSG00000006019.15	Dhx34	chr7	-	16217987	16219184	16217987	16218950	16221997	16222037	4406	11,9	64,47	19,11	21,17	198	99	3.11692e-05	0.00275398	0.079,0.087	0.311,0.244	-0.194
7609	ENSMUSG00000010097.15	Nxf1	chr19	+	8766392	8766833	8766796	8766833	8764921	8765031	7609	344237	1073835	479304	360459	198	99	6.57642e-09	1.91707e-06	0.138,0.124	0.399,0.249	-0.193
12529	ENSMUSG00000022098.10	Bmp1	chr14	-	70486146	70486605	70486146	70486272	70490019	70490200	12529	138136	817795	192140	179293	198	99	1.23557e-11	7.55873e-09	0.078,0.079	0.349,0.193	-0.193
52369	ENSMUSG00000030822.15	Prr14	chr7	+	127471704	127471977	127471905	127471977	127470951	127471119	52369	165125	40,32	66,68	7,4	198	99	0.000293719	0.0160693	0.673,0.661	0.825,0.895	-0.193
630	ENSMUSG00000053411.16	Cbx7	chr15	-	79918752	79918927	79918752	79918825	79921371	79921438	630	3,10	30,25	35,21	33,31	198	99	0.000256524	0.0146303	0.048,0.167	0.347,0.253	-0.192
42554	ENSMUSG00000022433.19	Csnk1e	chr15	-	79424151	79424361	79424151	79424255	79424839	79424988	42554	62,67	234189	93,67	73,94	198	99	1.45589e-07	2.99686e-05	0.117,0.151	0.389,0.263	-0.192
14721	ENSMUSG00000002799.6	Jag2	chr12	-	112913615	112914070	112913615	112913729	112914125	112914278	14721	29,28	3,5	50,36	0,1	198	99	0.000142166	0.00912532	0.829,0.737	1.0,0.947	-0.191
3014	ENSMUSG00000023150.14	Ivns1abp	chr1	+	151355166	151356236	151356128	151356236	151354633	151354759	3014	573452	19551694	1035823	9401115	198	99	0	0	0.128,0.118	0.355,0.27	-0.19
16962	ENSMUSG00000020876.14	Snx11	chr11	-	96774440	96774642	96774440	96774495	96776967	96777061	16962	5,5	42,39	21,9	25,18	198	99	1.21697e-05	0.00129469	0.056,0.06	0.296,0.2	-0.19
17099	ENSMUSG00000020544.14	Cox11	chr11	+	90640322	90640532	90640364	90640532	90638172	90638552	17099	0,0	11,10	5,4	13,14	141	99	8.23937e-05	0.0059164	0.0,0.0	0.213,0.167	-0.19
733	ENSMUSG00000022098.10	Bmp1	chr14	-	70486146	70486930	70486146	70486272	70490019	70490200	733	700695	817795	497384	179293	198	99	0.000598194	0.0283654	0.3,0.304	0.581,0.396	-0.186
23710	ENSMUSG00000028560.11	Usp1	chr4	+	98926501	98926674	98926582	98926674	98923963	98924243	23710	34,18	3,3	15,19	0,0	180	99	0.000749255	0.0338895	0.862,0.767	1.0,1.0	-0.185
10181	ENSMUSG00000022867.10	Usp25	chr16	+	77113740	77113856	77113772	77113856	77111065	77111145	10181	34,25	12,1	8,7	0,0	131	99	0.000233813	0.0135655	0.682,0.95	1.0,1.0	-0.184
9363	ENSMUSG00000010110.17	Stx5a	chr19	+	8742017	8742497	8742253	8742497	8741488	8741575	9363	177165	222202	213199	97138	198	99	6.64461e-06	0.000776047	0.285,0.29	0.523,0.419	-0.183
25931	ENSMUSG00000014599.10	Csf1	chr3	-	107756616	107757069	107756616	107756739	107760024	107760469	25931	19,5	251161	41,34	84,61	198	99	0	0	0.036,0.015	0.196,0.218	-0.182
29223	ENSMUSG00000026502.13	Desi2	chr1	+	178244345	178244482	178244361	178244482	178242611	178242705	29223	15,16	4,2	5,5	0,0	115	99	0.0006247	0.0292607	0.763,0.873	1.0,1.0	-0.182
33855	ENSMUSG00000041935.10	AW549877	chr15	-	3991717	3992067	3991717	3991864	3992357	3992464	33855	40,20	185142	96,71	102134	198	99	4.78329e-10	1.98632e-07	0.098,0.066	0.32,0.209	-0.182
13017	ENSMUSG00000004561.14	Mettl17	chr14	+	51888955	51889217	51889146	51889217	51888741	51888836	13017	28,25	186142	61,50	65104	198	99	5.46153e-09	1.64008e-06	0.07,0.081	0.319,0.194	-0.181
3994	ENSMUSG00000039623.13	Ap5z1	chr5	+	142470382	142470556	142470393	142470556	142470289	142470327	3994	1,2	99,89	11,6	31,31	110	99	3.20477e-08	7.61843e-06	0.009,0.02	0.242,0.148	-0.18
11590	ENSMUSG00000068206.13	Pick1	chr15	+	79247921	79248296	79248151	79248296	79247264	79247315	11590	19,16	197160	92,50	104144	198	99	8.78975e-11	4.41336e-08	0.046,0.048	0.307,0.148	-0.18
34723	ENSMUSG00000003813.15	Rad23a	chr8	-	84838006	84838307	84838006	84838134	84838468	84838680	34723	29,22	5,2	38,47	1,0	198	99	0.000325006	0.0174435	0.744,0.846	0.95,1.0	-0.18
37620	ENSMUSG00000053332.13	Gas5	chr1	+	161036217	161036579	161036548	161036579	161035982	161036014	37620	582490	296206	17241262	315315	198	99	2.70193e-10	1.20808e-07	0.496,0.543	0.732,0.667	-0.18
37616	ENSMUSG00000053332.13	Gas5	chr1	+	161036192	161036579	161036548	161036579	161035982	161036014	37616	582491	296206	17241260	315315	198	99	3.19703e-10	1.37408e-07	0.496,0.544	0.732,0.667	-0.179
58148	ENSMUSG00000016262.14	Sertad4	chr1	-	192850951	192851143	192850951	192851100	192855442	192855756	58148	79,73	14,14	29,22	0,1	142	99	2.11153e-05	0.00206259	0.797,0.784	1.0,0.939	-0.179
12297	ENSMUSG00000015597.17	Zfp318	chr17	+	46409603	46409779	46409679	46409779	46409018	46409219	12297	3,1	110,82	9,5	22,12	175	99	3.72015e-08	8.5779e-06	0.015,0.007	0.188,0.191	-0.178
47307	ENSMUSG00000032119.5	Hinfp	chr9	-	44298333	44298626	44298333	44298411	44298872	44299025	47307	15,11	126,97	44,30	63,57	198	99	9.76775e-11	4.85901e-08	0.056,0.054	0.259,0.208	-0.178
6632	ENSMUSG00000043384.15	Gprasp1	chrX	+	135743441	135743731	135743562	135743731	135742732	135742978	6632	46,46	85,76	46,34	37,24	198	99	0.000417461	0.0214623	0.213,0.232	0.383,0.415	-0.177
37612	ENSMUSG00000053332.13	Gas5	chr1	+	161036094	161036579	161036548	161036579	161035982	161036014	37612	598500	296206	17391290	315315	198	99	2.59514e-10	1.17163e-07	0.503,0.548	0.734,0.672	-0.177
608	ENSMUSG00000062906.12	Hdac10	chr15	-	89124174	89124428	89124174	89124253	89124531	89124588	608	46,37	56,59	68,58	37,43	198	99	0.000588663	0.028062	0.291,0.239	0.479,0.403	-0.176
23206	ENSMUSG00000028962.14	Slc4a2	chr5	+	24439123	24439398	24439231	24439398	24438694	24438949	23206	31,23	4,2	39,33	0,0	198	99	0.000454703	0.0230028	0.795,0.852	1.0,1.0	-0.176
22880	ENSMUSG00000053730.15	Tmem39b	chr4	-	129692348	129692718	129692348	129692516	129693065	129693285	22880	8,12	45,56	8,17	11,24	198	99	0.000596716	0.028348	0.082,0.097	0.267,0.262	-0.175
5321	ENSMUSG00000026456.18	Cyb5r1	chr1	+	134407816	134408487	134408403	134408487	134407573	134407703	5321	118122	513417	356221	328375	198	99	3.1764e-10	1.37408e-07	0.103,0.128	0.352,0.228	-0.174
25098	ENSMUSG00000027601.13	Mtfr1	chr3	+	19208490	19208527	19208493	19208527	19206451	19206550	25098	15,14	2,4	4,9	0,0	102	99	0.000779748	0.0349391	0.879,0.773	1.0,1.0	-0.174
7610	ENSMUSG00000010097.15	Nxf1	chr19	+	8766741	8766833	8766796	8766833	8764921	8765031	7610	240150	1073835	317192	360459	154	99	2.63352e-08	6.37325e-06	0.126,0.104	0.361,0.212	-0.171
29727	ENSMUSG00000067150.6	Xpo5	chr17	+	46241466	46241890	46241725	46241890	46240814	46240922	29727	43,33	5,3	30,33	0,0	198	99	0.000147058	0.00936101	0.811,0.846	1.0,1.0	-0.171
18654	ENSMUSG00000020272.8	Stk10	chr11	+	32588535	32588950	32588755	32588950	32587312	32587385	18654	2,12	152147	15,8	28,19	198	99	1.72672e-09	6.22604e-07	0.007,0.039	0.211,0.174	-0.17
31876	ENSMUSG00000075225.14	Ccdc162	chr10	-	41580224	41580681	41580224	41580363	41581158	41581391	31876	0,0	1,3	13,15	46,27	198	99	0.000444918	0.0226571	0.0,0.0	0.124,0.217	-0.17
36737	ENSMUSG00000033159.14	Cnppd1	chr1	-	75141408	75141769	75141408	75141503	75142057	75142638	36737	371255	169177	198221	53,65	198	99	0.000156144	0.00980002	0.523,0.419	0.651,0.63	-0.17
50656	ENSMUSG00000026004.15	Kansl1l	chr1	-	66726686	66726808	66726686	66726805	66728443	66728575	50656	17,15	5,3	15,11	1,0	102	99	0.00115593	0.0464145	0.767,0.829	0.936,1.0	-0.17
55085	ENSMUSG00000110631.1	Gm42047	chr8	+	121837995	121838218	121838111	121838218	121836252	121837364	55085	103,94	32,19	165108	16,11	198	99	0.000536057	0.0260484	0.617,0.712	0.838,0.831	-0.17
27925	ENSMUSG00000059851.15	Kmt5c	chr7	+	4742490	4742728	4742618	4742728	4741849	4741981	27925	30,21	5,1	70,51	0,0	198	99	0.000235049	0.0136078	0.75,0.913	1.0,1.0	-0.168
24273	ENSMUSG00000025967.16	Eef1b2	chr1	+	63178022	63178565	63178422	63178565	63177486	63177876	24273	74,90	10,16	287236	16,5	198	99	2.62573e-05	0.0024089	0.787,0.738	0.9,0.959	-0.167
47385	ENSMUSG00000034269.12	Setd5	chr6	+	113110167	113110525	113110316	113110525	113109884	113109990	47385	23,14	403320	82,36	122120	198	99	0	0	0.028,0.021	0.252,0.13	-0.167
50144	ENSMUSG00000101166.6	Gm28496	chr7	+	44247909	44248295	44248251	44248295	44246773	44246823	50144	55,39	99104	75,66	65,63	198	99	1.22054e-05	0.00129592	0.217,0.158	0.366,0.344	-0.167
2242	ENSMUSG00000028689.14	Ccdc163	chr4	+	116711285	116711378	116711310	116711378	116710100	116710284	2242	13,7	65,64	30,17	44,55	124	99	0.000870162	0.0378845	0.138,0.08	0.352,0.198	-0.166
31019	ENSMUSG00000031577.10	Tti2	chr8	+	31152363	31152726	31152587	31152726	31150339	31151499	31019	0,1	3,0	1,4	1,0	198	99	0.00106482	0.0435037	0.0,1.0	0.333,1.0	-0.166
4428	ENSMUSG00000039671.18	Zmynd8	chr2	-	165846020	165846239	165846020	165846164	165851999	165852148	4428	665556	303310	203171	40,53	174	99	6.13624e-05	0.00465635	0.555,0.505	0.743,0.647	-0.165
56091	ENSMUSG00000042496.18	Prdm10	chr9	+	31316169	31316334	31316241	31316334	31313552	31313621	56091	48,27	4,4	16,20	0,0	171	99	0.000283476	0.0156524	0.874,0.796	1.0,1.0	-0.165
4086	ENSMUSG00000032966.14	Fkbp1a	chr2	+	151543905	151544140	151544012	151544140	151542817	151542865	4086	86,51	7,12	157100	2,6	198	99	0.000743629	0.0337428	0.86,0.68	0.975,0.893	-0.164
44664	ENSMUSG00000040751.12	Lat2	chr5	-	134603420	134603606	134603420	134603480	134604745	134604801	44664	0,0	8,9	5,2	10,7	198	99	0.000493839	0.0246494	0.0,0.0	0.2,0.125	-0.163
3093	ENSMUSG00000057649.6	Brd9	chr13	+	73942630	73942806	73942690	73942806	73941943	73942054	3093	54,34	116125	35,52	39,64	159	99	0.000150414	0.00952948	0.225,0.145	0.358,0.336	-0.162
11668	ENSMUSG00000033170.14	Card10	chr15	-	78789730	78790026	78789730	78789818	78791040	78791232	11668	34,38	3,4	8,11	0,0	198	99	0.000919311	0.0393859	0.85,0.826	1.0,1.0	-0.162
44875	ENSMUSG00000034748.16	Sirt6	chr10	-	81626489	81626973	81626489	81626617	81627471	81627797	44875	17,14	183218	71,38	106112	198	99	4.41869e-14	4.093e-11	0.044,0.031	0.251,0.145	-0.161
4321	ENSMUSG00000033124.15	Atg9a	chr1	-	75186189	75187186	75186189	75186938	75187684	75187826	4321	15,8	222222	34,10	44,50	198	99	1.95428e-09	6.90747e-07	0.033,0.018	0.279,0.091	-0.16
6919	ENSMUSG00000031328.15	Flna	chrX	-	74240815	74241300	74240815	74241258	74241386	74241549	6919	42,24	6,3	9,13	0,0	141	99	0.000289505	0.0158711	0.831,0.849	1.0,1.0	-0.16
44874	ENSMUSG00000034748.16	Sirt6	chr10	-	81626427	81626926	81626427	81626617	81627471	81627797	44874	15,17	183218	71,38	106112	198	99	8.90399e-14	7.97278e-11	0.039,0.038	0.251,0.145	-0.16
34946	ENSMUSG00000041997.16	Tlk1	chr2	-	70802979	70803133	70802979	70803130	70825192	70825728	34946	16,16	4,2	6,12	0,0	102	99	0.00121464	0.048018	0.795,0.886	1.0,1.0	-0.159
56251	ENSMUSG00000032301.13	Psma4	chr9	+	54952348	54952806	54952678	54952806	54952081	54952108	56251	38,27	3,3	64,60	0,0	198	99	0.000455757	0.0230335	0.864,0.818	1.0,1.0	-0.159
607	ENSMUSG00000053137.7	Mapk11	chr15	-	89145095	89145232	89145095	89145175	89145374	89145446	607	22,19	185159	52,35	83106	156	99	4.48767e-08	1.02596e-05	0.07,0.07	0.284,0.173	-0.158
10952	ENSMUSG00000039568.6	Ubald1	chr16	-	4876227	4876436	4876227	4876417	4879616	4880315	10952	17,20	5,1	2,7	0,0	118	99	0.000678792	0.03133	0.74,0.944	1.0,1.0	-0.158
30576	ENSMUSG00000101438.2	Gm19412	chr17	-	33919278	33919764	33919278	33919626	33920069	33920485	30576	0,0	18,9	8,4	13,23	198	99	5.87474e-05	0.00449602	0.0,0.0	0.235,0.08	-0.158
52783	ENSMUSG00000038611.17	Phrf1	chr7	+	141260845	141261114	141260959	141261114	141260396	141260707	52783	77,71	283268	40,47	50,65	198	99	2.36058e-07	4.52937e-05	0.12,0.117	0.286,0.266	-0.158
1966	ENSMUSG00000041530.16	Ago1	chr4	-	126460366	126460585	126460366	126460503	126460905	126461087	1966	7,9	169163	16,17	45,37	181	99	1.66126e-10	7.76097e-08	0.022,0.029	0.163,0.201	-0.157
17967	ENSMUSG00000020898.18	Ctc1	chr11	+	69033669	69034036	69033958	69034036	69033366	69033541	17967	7,4	344257	29,29	70,76	198	99	0	0	0.01,0.008	0.172,0.16	-0.157
17969	ENSMUSG00000020898.18	Ctc1	chr11	+	69033765	69034036	69033958	69034036	69033366	69033541	17969	7,4	344257	28,30	70,76	198	99	0	0	0.01,0.008	0.167,0.165	-0.157
19844	ENSMUSG00000019961.17	Tmpo	chr10	-	91153084	91153342	91153084	91153180	91158747	91158845	19844	17,25	178116	76,58	105123	198	99	6.25565e-11	3.32757e-08	0.046,0.097	0.266,0.191	-0.157
27016	ENSMUSG00000028059.15	Arhgef2	chr3	+	88629443	88629931	88629786	88629931	88616560	88616654	27016	10,11	218252	13,17	46,28	198	99	1.56819e-10	7.5224e-08	0.022,0.021	0.124,0.233	-0.157
46939	ENSMUSG00000071337.11	Tia1	chr6	+	86419324	86419794	86419693	86419794	86419100	86419133	46939	61,48	13,4	208113	7,4	198	99	0.000735294	0.0334777	0.701,0.857	0.937,0.934	-0.157
20950	ENSMUSG00000024556.4	Me2	chr18	-	73791608	73791700	73791608	73791694	73791800	73791910	20950	30,22	1,8	8,16	0,0	105	99	0.000470358	0.023661	0.966,0.722	1.0,1.0	-0.156
22440	ENSMUSG00000032101.6	Ddx25	chr9	-	35557684	35557751	35557684	35557728	35558337	35558528	22440	18,23	4,2	19,19	0,0	122	99	0.000943172	0.0401203	0.785,0.903	1.0,1.0	-0.156
44876	ENSMUSG00000034748.16	Sirt6	chr10	-	81626489	81626987	81626489	81626617	81627471	81627797	44876	19,16	183218	71,38	106112	198	99	7.24087e-13	5.55737e-10	0.049,0.035	0.251,0.145	-0.156
46941	ENSMUSG00000071337.11	Tia1	chr6	+	86419350	86419794	86419693	86419794	86419100	86419133	46941	61,48	13,4	206114	7,4	198	99	0.000756542	0.034127	0.701,0.857	0.936,0.934	-0.156
19612	ENSMUSG00000020166.15	Cnot2	chr10	-	116549032	116549173	116549032	116549105	116581452	116581511	19612	208225	95,69	109123	18,24	167	99	0.00080648	0.0357493	0.565,0.659	0.782,0.752	-0.155
47110	ENSMUSG00000002871.14	Tpra1	chr6	+	88905759	88906078	88905948	88906078	88902452	88902530	47110	11,8	176144	60,33	93118	198	99	9.60232e-13	7.16506e-10	0.03,0.027	0.244,0.123	-0.155
21051	ENSMUSG00000028063.15	Lmna	chr3	-	88483822	88484076	88483822	88483946	88484614	88484837	21051	27,25	6,0	39,23	0,0	198	99	0.000811855	0.0359283	0.692,1.0	1.0,1.0	-0.154
21052	ENSMUSG00000028063.15	Lmna	chr3	-	88483822	88484148	88483822	88483946	88484614	88484837	21052	27,26	6,0	37,22	0,0	198	99	0.000859292	0.0375634	0.692,1.0	1.0,1.0	-0.154
46942	ENSMUSG00000071337.11	Tia1	chr6	+	86419353	86419794	86419693	86419794	86419100	86419133	46942	63,48	13,4	206115	7,4	198	99	0.00077322	0.0347869	0.708,0.857	0.936,0.935	-0.153
6123	ENSMUSG00000036833.16	Pnpla7	chr2	+	24987113	24987199	24987118	24987199	24983489	24983649	6123	0,0	34,33	2,6	15,24	104	99	6.67779e-05	0.00498977	0.0,0.0	0.113,0.192	-0.152
4688	ENSMUSG00000001844.10	Zdhhc4	chr5	-	143324131	143324398	143324131	143324310	143324884	143324958	4688	75,48	143173	63,64	61,81	187	99	3.50354e-05	0.00303104	0.217,0.128	0.353,0.295	-0.151
19845	ENSMUSG00000019961.17	Tmpo	chr10	-	91153084	91153384	91153084	91153180	91158747	91158845	19845	18,26	178116	74,57	105123	198	99	3.45325e-10	1.46083e-07	0.048,0.101	0.261,0.188	-0.15
25435	ENSMUSG00000030231.11	Plekha5	chr6	+	140536607	140536763	140536647	140536763	140535174	140535360	25435	0,0	10,8	4,8	19,28	139	99	0.000143894	0.0092032	0.0,0.0	0.13,0.169	-0.15
31064	ENSMUSG00000026349.14	Ccnt2	chr1	+	127797530	127797886	127797840	127797886	127795254	127795317	31064	24,25	168142	68,34	69126	198	99	0.000120043	0.00793272	0.067,0.081	0.33,0.119	-0.15
10531	ENSMUSG00000022843.17	Clcn2	chr16	-	20707572	20707732	20707572	20707632	20707842	20707916	10531	22,20	221196	54,25	70,96	198	99	7.95118e-08	1.71557e-05	0.047,0.049	0.278,0.115	-0.149
17964	ENSMUSG00000020898.18	Ctc1	chr11	+	69033664	69034036	69033958	69034036	69033366	69033541	17964	14,7	344257	29,29	70,76	198	99	0	0	0.02,0.013	0.172,0.16	-0.149
41358	ENSMUSG00000025157.8	Zdhhc16	chr19	+	41934741	41934883	41934807	41934883	41933521	41933665	41358	50,49	3,9	45,62	0,1	165	99	5.52526e-05	0.00429795	0.909,0.766	1.0,0.974	-0.149
4908	ENSMUSG00000030032.12	Wdr54	chr6	-	83155069	83155240	83155069	83155136	83155477	83155540	4908	15,6	76,54	34,33	46,82	198	99	3.40613e-05	0.00296108	0.09,0.053	0.27,0.168	-0.148
5500	ENSMUSG00000001909.16	Trmt1	chr8	+	84690772	84690947	84690810	84690947	84690516	84690572	5500	46,33	400387	85,64	183218	137	99	1.25833e-12	9.01381e-10	0.077,0.058	0.251,0.175	-0.145
53101	ENSMUSG00000019470.12	Xab2	chr8	-	3613158	3613483	3613158	3613290	3613589	3613709	53101	44,29	3,3	79,57	0,0	198	99	0.000650905	0.0302068	0.88,0.829	1.0,1.0	-0.145
30361	ENSMUSG00000028431.11	Elp1	chr4	-	56774687	56775082	56774687	56774766	56775424	56775540	30361	37,45	6,2	49,26	1,0	198	99	0.000971474	0.040867	0.755,0.918	0.961,1.0	-0.144
5855	ENSMUSG00000036977.8	Anapc10	chr8	+	79713104	79713279	79713152	79713279	79711819	79711844	5855	71,71	97,69	204144	122,99	147	99	0.000902042	0.0388008	0.33,0.409	0.53,0.495	-0.143
3335	ENSMUSG00000026584.14	Scyl3	chr1	+	163941020	163941218	163941106	163941218	163939880	163939983	3335	59,43	203153	48,42	66,61	185	99	1.03624e-05	0.00113385	0.135,0.131	0.28,0.269	-0.142
12595	ENSMUSG00000034327.17	Kctd9	chr14	+	67737559	67737711	67737605	67737711	67733346	67733442	12595	1,3	51,55	4,6	17,17	145	99	0.00043539	0.0222563	0.013,0.036	0.138,0.194	-0.142
31065	ENSMUSG00000026349.14	Ccnt2	chr1	+	127797632	127797886	127797840	127797886	127795254	127795317	31065	30,27	168142	67,36	69126	198	99	0.000385532	0.0200899	0.082,0.087	0.327,0.125	-0.142
9360	ENSMUSG00000002250.16	Ppard	chr17	+	28298583	28299034	28298790	28299034	28298276	28298479	9360	67,56	4,6	17,28	0,0	198	99	0.000287674	0.0158029	0.893,0.824	1.0,1.0	-0.141
8990	ENSMUSG00000023912.10	Slc25a27	chr17	-	43659815	43660098	43659815	43659898	43661613	43661698	8990	0,0	24,21	4,7	24,14	198	99	3.66233e-05	0.00314814	0.0,0.0	0.077,0.2	-0.139
9178	ENSMUSG00000092595.2	Gm20427	chr17	-	34030565	34031262	34030565	34030734	34031547	34031580	9178	50,49	4,4	42,32	0,0	198	99	0.00036925	0.0193919	0.862,0.86	1.0,1.0	-0.139
30362	ENSMUSG00000028431.11	Elp1	chr4	-	56774687	56775131	56774687	56774766	56775424	56775540	30362	39,45	6,2	49,26	1,0	198	99	0.00104501	0.0430875	0.765,0.918	0.961,1.0	-0.139
30363	ENSMUSG00000028431.11	Elp1	chr4	-	56774687	56775162	56774687	56774766	56775424	56775540	30363	39,44	6,2	49,26	1,0	198	99	0.00100005	0.041714	0.765,0.917	0.961,1.0	-0.139
3669	ENSMUSG00000026203.16	Dnajb2	chr1	+	75239107	75239333	75239279	75239333	75237454	75237564	3669	9,7	137113	26,16	41,74	198	99	2.12718e-07	4.15574e-05	0.032,0.03	0.241,0.098	-0.138
4490	ENSMUSG00000030780.15	BC017158	chr7	-	128274632	128274723	128274632	128274703	128276085	128276143	4490	8,8	114,64	15,11	35,48	119	99	0.000554461	0.0268123	0.055,0.094	0.263,0.16	-0.137
14766	ENSMUSG00000064326.13	Siva1	chr12	+	112646822	112646985	112646841	112646985	112644966	112645084	14766	0,0	20,22	9,4	33,35	118	99	4.49181e-05	0.00366752	0.0,0.0	0.186,0.087	-0.137
32027	ENSMUSG00000028676.17	Srsf10	chr4	+	135861770	135861877	135861780	135861877	135858841	135859201	32027	79,68	10,17	95,71	3,2	109	99	1.33149e-05	0.00140389	0.878,0.784	0.966,0.97	-0.137
56398	ENSMUSG00000036986.16	Pml	chr9	-	58229985	58230364	58229985	58230086	58230490	58230628	56398	14,21	307226	21,23	56,52	198	99	2.79947e-11	1.65277e-08	0.022,0.044	0.158,0.181	-0.136
14252	ENSMUSG00000037816.10	Fbxw17	chr13	+	50432100	50432339	50432170	50432339	50431539	50431750	14252	11,5	79,62	18,16	38,45	169	99	0.000100211	0.00690232	0.075,0.045	0.217,0.172	-0.135
30364	ENSMUSG00000028431.11	Elp1	chr4	-	56774687	56775166	56774687	56774766	56775424	56775540	30364	40,47	6,2	49,27	1,0	198	99	0.00114195	0.045956	0.769,0.922	0.961,1.0	-0.135
54647	ENSMUSG00000027330.16	Cdc25b	chr2	+	131192777	131193148	131193067	131193148	131192556	131192688	54647	22,8	237191	47,28	88100	198	99	3.91454e-12	2.73128e-09	0.044,0.021	0.211,0.123	-0.134
35292	ENSMUSG00000021339.4	Mrs2	chr13	-	24998793	24999072	24998793	24999055	25001626	25001800	35292	15,6	227164	31,20	111,92	116	99	1.88539e-08	4.71129e-06	0.053,0.03	0.192,0.156	-0.133
5025	ENSMUSG00000038346.18	Zfp384	chr6	+	125024413	125024552	125024504	125024552	125024032	125024270	5025	25,14	152100	41,13	50,53	190	99	0.000452661	0.0229507	0.079,0.068	0.299,0.113	-0.132
9712	ENSMUSG00000044533.15	Rps2	chr17	+	24720943	24721302	24721142	24721302	24720533	24720731	9712	0,0	24,20	2,9	13,19	198	99	1.92831e-05	0.00192803	0.0,0.0	0.071,0.191	-0.131
34788	ENSMUSG00000031862.11	Atp13a1	chr8	+	69798492	69798561	69798560	69798561	69797940	69797996	34788	56,52	2,8	98,86	0,0	167	99	1.76935e-05	0.00179355	0.943,0.794	1.0,1.0	-0.131
1392	ENSMUSG00000001034.17	Mapk7	chr11	-	61492903	61493185	61492903	61493069	61493646	61494266	1392	33,24	95112	26,24	39,35	198	99	0.000581954	0.0278128	0.148,0.097	0.25,0.255	-0.13
40681	ENSMUSG00000027134.4	Lpcat4	chr2	+	112242978	112243062	112243003	112243062	112242719	112242761	40681	9,2	221194	38,21	119160	124	99	3.43484e-11	1.98427e-08	0.031,0.008	0.203,0.095	-0.13
4264	ENSMUSG00000040296.15	Ddx58	chr4	-	40227965	40228200	40227965	40228113	40229494	40229676	4264	1,1	37,55	2,6	10,14	186	99	0.000179717	0.0109844	0.014,0.01	0.096,0.186	-0.129
20562	ENSMUSG00000022178.11	Ajuba	chr14	-	54571765	54572227	54571765	54571833	54573391	54573493	20562	86,54	11811023	136,92	279330	198	99	0	0	0.035,0.026	0.196,0.122	-0.129
21934	ENSMUSG00000040473.15	Cfap69	chr5	-	5644423	5644560	5644423	5644500	5646935	5647045	21934	0,4	42,24	6,12	20,31	159	99	0.00025904	0.0147269	0.0,0.094	0.157,0.194	-0.129
39765	ENSMUSG00000005774.12	Rfx5	chr3	+	94955668	94955828	94955745	94955828	94955351	94955385	39765	8,13	89100	20,12	44,34	176	99	5.51795e-05	0.00429795	0.048,0.068	0.204,0.166	-0.127
49851	ENSMUSG00000060601.13	Nr1h2	chr7	-	44551954	44552343	44551954	44552234	44552506	44552620	49851	44,58	2,6	65,46	0,0	198	99	0.000158603	0.00991749	0.917,0.829	1.0,1.0	-0.127
312	ENSMUSG00000050410.15	Tcf19	chr17	-	35515877	35516539	35515877	35516430	35516758	35516820	312	44,41	90105	58,34	57,45	198	99	0.000929876	0.0396952	0.196,0.163	0.337,0.274	-0.126
26631	ENSMUSG00000028107.14	Tars2	chr3	-	95750700	95750979	95750700	95750765	95751505	95751630	26631	48,33	8,0	66,60	0,0	198	99	0.000183742	0.0111922	0.75,1.0	1.0,1.0	-0.125
53102	ENSMUSG00000019470.12	Xab2	chr8	-	3613158	3613518	3613158	3613290	3613589	3613709	53102	57,33	3,3	98,77	0,0	198	99	0.00121741	0.0480921	0.905,0.846	1.0,1.0	-0.125
2507	ENSMUSG00000030761.16	Myo7a	chr7	-	98065611	98065895	98065611	98065781	98066340	98066467	2507	59,47	189183	40,43	78,52	198	99	0.000191843	0.0115879	0.135,0.114	0.204,0.293	-0.124
3225	ENSMUSG00000025280.8	Polr3a	chr14	-	24469264	24469443	24469264	24469429	24470533	24470672	3225	9,5	233216	10,26	83,87	113	99	1.65456e-08	4.27362e-06	0.033,0.02	0.095,0.207	-0.124
3414	ENSMUSG00000028049.15	Scamp3	chr3	+	89180038	89180380	89180251	89180380	89179316	89179437	3414	19,9	343283	85,39	163210	198	99	1.77636e-15	2.12077e-12	0.027,0.016	0.207,0.085	-0.124
11290	ENSMUSG00000015377.10	Dennd6b	chr15	-	89188458	89188540	89188458	89188521	89188610	89188690	11290	3,1	65,35	11,11	58,45	118	99	0.000152215	0.00962086	0.037,0.023	0.137,0.17	-0.124
47386	ENSMUSG00000034269.12	Setd5	chr6	+	113110167	113110525	113110373	113110525	113109884	113109990	47386	226232	598557	149,98	160139	198	99	4.71624e-07	8.17354e-05	0.159,0.172	0.318,0.261	-0.124
12339	ENSMUSG00000013236.17	Ptprs	chr17	-	56437785	56437933	56437785	56437878	56447359	56447470	12339	49,41	2,6	13,17	0,0	154	99	0.000947918	0.0401632	0.94,0.815	1.0,1.0	-0.123
16073	ENSMUSG00000025137.15	Pcyt2	chr11	-	120612000	120612112	120612000	120612083	120612462	120612601	16073	24,10	185154	53,42	136180	128	99	1.45078e-06	0.000217112	0.091,0.048	0.232,0.153	-0.123
53021	ENSMUSG00000039176.17	Polg	chr7	-	79454810	79455094	79454810	79454864	79455434	79455595	53021	36,27	299261	56,33	95115	198	99	5.30501e-09	1.61024e-06	0.057,0.049	0.228,0.125	-0.123
15106	ENSMUSG00000021244.15	Ylpm1	chr12	+	85060240	85060314	85060262	85060314	85057221	85057302	15106	3,0	84,66	6,1	21,9	121	99	0.000776945	0.0348716	0.028,0.0	0.189,0.083	-0.122
26974	ENSMUSG00000068917.12	Clk2	chr3	+	89169963	89170115	89170048	89170115	89169617	89169702	26974	8,2	214221	31,22	84104	184	99	5.55112e-16	6.77804e-13	0.02,0.005	0.166,0.102	-0.122
47375	ENSMUSG00000026620.11	Mark1	chr1	-	184929321	184929395	184929321	184929370	184943205	184943259	47375	3,0	85,73	6,5	24,34	124	99	5.75122e-05	0.00442038	0.027,0.0	0.166,0.105	-0.122
1397	ENSMUSG00000032633.12	Flcn	chr11	-	59795140	59795575	59795140	59795264	59795749	59795863	1397	44,24	320278	69,47	114181	198	99	1.46393e-08	3.81794e-06	0.064,0.041	0.232,0.115	-0.121
3847	ENSMUSG00000031314.18	Taf1	chrX	+	101540759	101541001	101540822	101541001	101539067	101539187	3847	355271	95,80	145197	20,31	162	99	0.000923066	0.0394524	0.695,0.674	0.816,0.795	-0.121
34880	ENSMUSG00000037679.9	Inf2	chr12	+	112612544	112612604	112612547	112612604	112611409	112612036	34880	17,20	200191	17,11	55,49	102	99	0.000685125	0.0315951	0.076,0.092	0.231,0.179	-0.121
4459	ENSMUSG00000031562.15	Dctd	chr8	+	48138178	48138878	48138781	48138878	48137257	48137374	4459	42,41	312291	88,65	164177	198	99	4.33151e-11	2.42407e-08	0.063,0.066	0.212,0.155	-0.119
35209	ENSMUSG00000044328.13	Trp53i13	chr11	-	77512667	77512965	77512667	77512896	77513159	77513370	35209	108107	13,10	42,54	1,1	168	99	0.000449823	0.0228635	0.83,0.863	0.961,0.97	-0.119
47714	ENSMUSG00000038346.18	Zfp384	chr6	+	125024383	125024552	125024504	125024552	125024032	125024270	47714	21,13	152100	37,11	50,53	198	99	0.000392513	0.0204141	0.065,0.061	0.27,0.094	-0.119
522	ENSMUSG00000022843.17	Clcn2	chr16	-	20709569	20709724	20709569	20709680	20709879	20709949	522	22,19	199191	31,31	104,86	143	99	1.9764e-06	0.000278694	0.071,0.064	0.171,0.2	-0.118
46045	ENSMUSG00000002413.15	Braf	chr6	-	39677377	39677472	39677377	39677454	39677571	39677641	46045	58,41	11,4	28,21	0,1	117	99	0.000262911	0.014875	0.817,0.897	1.0,0.947	-0.117
1892	ENSMUSG00000035735.10	Dagla	chr19	-	10254806	10255062	10254806	10254949	10255660	10255741	1892	7,1	80,62	13,2	20,26	198	99	0.000972897	0.040867	0.042,0.008	0.245,0.037	-0.116
51082	ENSMUSG00000032363.15	Adamts7	chr9	+	90195422	90195850	90195676	90195850	90195157	90195310	51082	2,3	61,70	5,6	15,21	198	99	0.000199736	0.0119337	0.016,0.021	0.143,0.125	-0.116
37621	ENSMUSG00000053332.13	Gas5	chr1	+	161036525	161036579	161036548	161036579	161035982	161036014	37621	70,38	296206	150124	315315	122	99	8.88415e-06	0.000986159	0.161,0.13	0.279,0.242	-0.115
16335	ENSMUSG00000020752.11	Recql5	chr11	-	115927328	115927582	115927328	115927434	115927967	115928486	16335	4,4	95,82	21,14	55,55	198	99	7.25433e-08	1.5843e-05	0.021,0.024	0.16,0.113	-0.114
46314	ENSMUSG00000044465.19	Fam160a2	chr7	-	105381398	105381859	105381398	105381577	105383780	105384572	46314	10,7	139141	17,13	48,41	198	99	3.42514e-07	6.28039e-05	0.035,0.024	0.15,0.137	-0.114
361	ENSMUSG00000024220.14	Zfp523	chr17	+	28197750	28197973	28197773	28197973	28195147	28195225	361	17,9	134129	21,20	65,83	122	99	0.00026005	0.0147531	0.093,0.054	0.208,0.164	-0.113
4693	ENSMUSG00000026199.17	Ankzf1	chr1	+	75195568	75195712	75195599	75195712	75195062	75195256	4693	21,21	162170	29,27	68110	130	99	0.000265391	0.014977	0.09,0.086	0.245,0.157	-0.113
13150	ENSMUSG00000023908.8	Pkmyt1	chr17	+	23734682	23735123	23734965	23735123	23732336	23734316	13150	16,12	125135	40,16	70,67	198	99	5.04519e-06	0.000613242	0.06,0.043	0.222,0.107	-0.113
4700	ENSMUSG00000029625.16	Cpsf4	chr5	+	145178783	145178928	145178835	145178928	145177229	145177302	4700	52,41	278205	74,59	162138	151	99	4.94276e-06	0.000604897	0.109,0.116	0.23,0.219	-0.112
28468	ENSMUSG00000002602.16	Axl	chr7	-	25773098	25773405	25773098	25773125	25774514	25774725	28468	42,26	160,80	41,27	53,54	198	99	0.000814559	0.0359887	0.116,0.14	0.279,0.2	-0.112
36847	ENSMUSG00000026211.17	Obsl1	chr1	-	75492066	75492399	75492066	75492342	75492505	75492793	36847	2,4	64,74	5,8	24,27	156	99	0.00044055	0.0224772	0.019,0.033	0.117,0.158	-0.112
2742	ENSMUSG00000038733.14	Wdr26	chr1	-	181203023	181203224	181203023	181203160	181209002	181209107	2742	11,13	299259	21,22	80,85	163	99	1.8148e-10	8.40517e-08	0.022,0.03	0.138,0.136	-0.111
23009	ENSMUSG00000041530.16	Ago1	chr4	-	126460366	126460678	126460366	126460503	126460905	126461087	23009	9,9	169163	13,13	45,37	198	99	4.4624e-07	7.86041e-05	0.026,0.027	0.126,0.149	-0.111
5060	ENSMUSG00000056673.14	Kdm5d	chrY	+	927602	927891	927709	927891	927244	927439	5060	47,38	166127	61,65	97105	198	99	7.44715e-05	0.00542874	0.124,0.13	0.239,0.236	-0.11
56591	ENSMUSG00000032387.15	Rbpms2	chr9	+	65651585	65651704	65651660	65651704	65650932	65651083	56591	133,61	4,7	32,34	0,0	174	99	0.000773761	0.0347869	0.95,0.832	1.0,1.0	-0.109
1958	ENSMUSG00000053730.15	Tmem39b	chr4	-	129692432	129692673	129692432	129692516	129693065	129693285	1958	2,2	45,56	2,10	11,24	198	99	0.000119224	0.00789803	0.022,0.018	0.083,0.172	-0.108
5502	ENSMUSG00000001909.16	Trmt1	chr8	+	84690784	84690947	84690810	84690947	84690516	84690572	5502	44,28	400387	59,47	183218	125	99	2.33036e-08	5.71683e-06	0.08,0.054	0.203,0.146	-0.107
52173	ENSMUSG00000020827.18	Mink1	chr11	+	70610039	70610181	70610077	70610181	70609553	70609717	52173	6,10	208190	14,12	59,61	137	99	1.2623e-06	0.000193763	0.02,0.037	0.146,0.124	-0.107
788	ENSMUSG00000004562.16	Arhgef40	chr14	+	52004878	52005035	52004988	52005035	52004611	52004742	788	167137	414378	92,82	114126	198	99	5.4518e-05	0.00426343	0.168,0.153	0.287,0.246	-0.106
5841	ENSMUSG00000032525.15	Nktr	chr9	+	121742564	121742787	121742639	121742787	121741597	121741743	5841	319294	59,29	193141	11,8	174	99	0.000601229	0.028459	0.755,0.852	0.909,0.909	-0.106
23084	ENSMUSG00000023051.11	Tarbp2	chr15	+	102520887	102521213	102521120	102521213	102520474	102520577	23084	31,39	268241	83,93	196230	198	99	8.84078e-10	3.44182e-07	0.055,0.075	0.175,0.168	-0.106
4231	ENSMUSG00000038671.15	Arfrp1	chr2	-	181364013	181364195	181364013	181364096	181364310	181364398	4231	63,32	286242	130105	271242	198	99	1.22129e-08	3.26437e-06	0.099,0.062	0.193,0.178	-0.105
5213	ENSMUSG00000030374.15	Strn4	chr7	+	16831345	16831580	16831464	16831580	16831024	16831138	5213	16,7	162144	31,13	73,55	198	99	1.58211e-07	3.21966e-05	0.047,0.024	0.175,0.106	-0.105
34018	ENSMUSG00000026584.14	Scyl3	chr1	+	163940758	163941218	163941106	163941218	163939880	163939983	34018	44,39	203153	36,32	66,61	198	99	0.000185813	0.01128	0.098,0.113	0.214,0.208	-0.105
41977	ENSMUSG00000031834.15	Pik3r2	chr8	-	70772602	70772953	70772602	70772695	70774655	70775352	41977	49,49	13781324	75,97	288321	198	99	0	0	0.017,0.018	0.115,0.131	-0.105
5071	ENSMUSG00000035569.17	Ankrd11	chr8	-	122899978	122900183	122899978	122900149	122908667	122908806	5071	54,28	579510	30,25	112109	133	99	7.92486e-08	1.71557e-05	0.065,0.039	0.166,0.146	-0.104
8030	ENSMUSG00000024843.15	Chka	chr19	+	3875366	3875788	3875734	3875788	3864647	3864759	8030	12,19	172133	39,32	74143	198	99	4.62714e-06	0.000569146	0.034,0.067	0.209,0.101	-0.104
49188	ENSMUSG00000023977.15	Ubr2	chr17	-	46945045	46945389	46945045	46945101	46946017	46946166	49188	5,6	263201	15,16	65,54	198	99	9.38583e-12	5.93239e-09	0.009,0.015	0.103,0.129	-0.104
4468	ENSMUSG00000029165.17	Agbl5	chr5	+	30905017	30905155	30905108	30905155	30904702	30904815	4468	2,0	35,27	5,4	16,20	190	99	0.000964865	0.0407617	0.029,0.0	0.14,0.094	-0.103
4698	ENSMUSG00000029625.16	Cpsf4	chr5	+	145178757	145178928	145178835	145178928	145177229	145177302	4698	132126	278205	142128	162138	177	99	0.00064654	0.0300739	0.21,0.256	0.329,0.342	-0.103
12799	ENSMUSG00000002319.16	Ipo4	chr14	-	55626153	55626467	55626153	55626223	55627339	55627444	12799	27,35	733616	82,55	218265	198	99	0	0	0.018,0.028	0.158,0.094	-0.103
35069	ENSMUSG00000026811.18	St6galnac6	chr2	+	32619339	32619529	32619343	32619529	32618496	32618604	35069	220190	56,45	145160	10,24	103	99	0.000341582	0.0181698	0.791,0.802	0.933,0.865	-0.103
56592	ENSMUSG00000032387.15	Rbpms2	chr9	+	65651618	65651704	65651660	65651704	65650932	65651083	56592	112,53	4,7	29,29	0,0	141	99	0.000845177	0.0370368	0.952,0.842	1.0,1.0	-0.103
5503	ENSMUSG00000001909.16	Trmt1	chr8	+	84690801	84690947	84690810	84690947	84690516	84690572	5503	51,42	400387	56,52	183218	108	99	6.88796e-06	0.000799256	0.105,0.09	0.219,0.179	-0.102
481	ENSMUSG00000071533.11	Pcnp	chr16	-	56024223	56024438	56024223	56024386	56029602	56029696	481	725682	231224	774769	172131	151	99	0.000101448	0.00695628	0.673,0.666	0.747,0.794	-0.101
1822	ENSMUSG00000042508.16	Dmtf1	chr5	-	9126539	9126802	9126539	9126749	9127956	9128108	1822	38,23	197183	38,46	126103	152	99	8.1392e-05	0.00588531	0.112,0.076	0.164,0.225	-0.101
3404	ENSMUSG00000025212.17	Sfxn3	chr19	+	45050635	45050725	45050649	45050725	45050227	45050326	3404	5,6	299210	15,6	72,55	113	99	2.52083e-07	4.80254e-05	0.014,0.024	0.154,0.087	-0.101
5420	ENSMUSG00000003190.12	Bcl2l12	chr7	-	44994362	44994476	44994362	44994449	44996543	44996686	5420	18,9	200191	30,25	117125	126	99	3.59515e-06	0.000460977	0.066,0.036	0.168,0.136	-0.101
5673	ENSMUSG00000025494.8	Sigirr	chr7	-	141094781	141095317	141094781	141094945	141096619	141096739	5673	29,31	249226	81,91	199256	198	99	2.60293e-09	8.85079e-07	0.055,0.064	0.169,0.151	-0.101
35601	ENSMUSG00000031392.18	Irak1	chrX	-	74022237	74022558	74022237	74022249	74022848	74023065	35601	89,59	4,4	66,59	0,0	198	99	0.000947688	0.0401632	0.918,0.881	1.0,1.0	-0.101
38010	ENSMUSG00000031310.16	Zmym3	chrX	-	101414747	101415038	101414747	101414898	101415187	101415406	38010	10,5	115,97	13,8	31,38	198	99	0.000162142	0.010094	0.042,0.025	0.173,0.095	-0.101
40507	ENSMUSG00000026238.14	Ptma	chr1	+	86529464	86529786	86529730	86529786	86529172	86529244	40507	790599	163,99	908801	92,82	198	99	2.45391e-05	0.00227304	0.708,0.752	0.832,0.83	-0.101
40510	ENSMUSG00000026238.14	Ptma	chr1	+	86529482	86529786	86529730	86529786	86529172	86529244	40510	790598	163,99	908802	92,82	198	99	2.35297e-05	0.00220617	0.708,0.751	0.832,0.83	-0.101
40512	ENSMUSG00000026238.14	Ptma	chr1	+	86529530	86529786	86529730	86529786	86529172	86529244	40512	794598	163,99	908801	92,82	198	99	2.60804e-05	0.00239926	0.709,0.751	0.832,0.83	-0.101
40513	ENSMUSG00000026238.14	Ptma	chr1	+	86529536	86529786	86529730	86529786	86529172	86529244	40513	790598	163,99	912801	92,82	198	99	2.23391e-05	0.00213515	0.708,0.751	0.832,0.83	-0.101
44032	ENSMUSG00000042744.16	Hectd4	chr5	+	121317201	121317283	121317204	121317283	121315316	121315506	44032	90107	0,2	29,37	4,4	102	99	0.000400971	0.0208137	1.0,0.981	0.876,0.9	0.102
9230	ENSMUSG00000024299.17	Adamts10	chr17	+	33545303	33545437	33545314	33545437	33544954	33545057	9230	27,19	0,0	56,49	7,4	110	99	0.00035168	0.0186515	1.0,1.0	0.878,0.917	0.103
34080	ENSMUSG00000085396.7	Firre	chrX	-	50612104	50612241	50612104	50612237	50612704	50612850	34080	10,17	0,0	52,46	2,9	103	99	0.000903567	0.0388353	1.0,1.0	0.962,0.831	0.104
42405	ENSMUSG00000020576.10	Nbas	chr12	+	13474126	13474237	13474129	13474237	13469840	13470070	42405	125,93	1,2	26,27	3,4	102	99	0.00116044	0.046526	0.992,0.978	0.894,0.868	0.104
55383	ENSMUSG00000071302.10	2610044O15Rik8	chr8	-	129221543	129221990	129221543	129221904	129233904	129234046	55383	36,31	0,0	50,65	2,6	185	99	0.000615013	0.0288889	1.0,1.0	0.93,0.853	0.109
1468	ENSMUSG00000034175.13	Rhbdd3	chr11	+	5105180	5105347	5105184	5105347	5104020	5104404	1468	8,5	63,39	0,0	24,23	103	99	0.000149242	0.00947755	0.109,0.11	0.0,0.0	0.11
3283	ENSMUSG00000041459.15	Tardbp	chr4	-	148617565	148617825	148617565	148617705	148618673	148618791	3283	16891450	123104	11741204	213155	198	99	1.27977e-08	3.40375e-06	0.873,0.875	0.734,0.795	0.11
19741	ENSMUSG00000005682.9	Pan2	chr10	+	128315513	128315657	128315601	128315657	128315097	128315236	19741	130143	0,1	63,56	7,2	187	99	6.44713e-05	0.00485865	1.0,0.987	0.827,0.937	0.112
51330	ENSMUSG00000032812.18	Arap1	chr7	+	101400882	101400988	101400884	101400988	101400391	101400604	51330	116109	1,0	31,37	3,6	101	99	3.56977e-05	0.00307843	0.991,1.0	0.91,0.858	0.112
1731	ENSMUSG00000024924.14	Vldlr	chr19	+	27241234	27241453	27241299	27241453	27240465	27240637	1731	831704	17,7	94168	14,9	164	99	8.34473e-07	0.000136268	0.967,0.984	0.802,0.918	0.115
53003	ENSMUSG00000031075.18	Ano1	chr7	-	144648171	144648640	144648171	144648345	144650502	144650554	53003	703657	4,2	152160	12,10	198	99	5.61711e-11	3.04827e-08	0.989,0.994	0.864,0.889	0.115
5399	ENSMUSG00000032235.15	Ice2	chr9	+	69407116	69407366	69407264	69407366	69400476	69400581	5399	209222	4,4	153196	17,14	198	99	1.10026e-05	0.00118936	0.963,0.965	0.818,0.875	0.117
9521	ENSMUSG00000073434.12	Wdr90	chr17	-	25860018	25860133	25860018	25860116	25860371	25860817	9521	71,52	1,0	43,28	10,1	116	99	4.36508e-05	0.00360791	0.984,1.0	0.786,0.96	0.119
3643	ENSMUSG00000031278.12	Acsl4	chrX	-	142351378	142351908	142351378	142351618	142360386	142360436	3643	232174	238225	125122	256295	198	99	3.03023e-06	0.000401974	0.328,0.279	0.196,0.171	0.12
36806	ENSMUSG00000011958.17	Bnip2	chr9	+	69998044	69998306	69998279	69998306	69997175	69997257	36806	15,6	0,0	61,53	10,0	198	99	0.00117145	0.0468625	1.0,1.0	0.753,1.0	0.123
18458	ENSMUSG00000059142.16	Zfp945	chr17	-	22861731	22861980	22861731	22861852	22865246	22865336	18458	5,5	15,16	0,1	38,19	198	99	6.65897e-05	0.00498264	0.143,0.135	0.0,0.026	0.126
22344	ENSMUSG00000028991.15	Mtor	chr4	+	148465890	148466096	148465997	148466096	148464946	148465162	22344	146143	1,1	61,51	8,2	198	99	4.40706e-05	0.00362033	0.986,0.986	0.792,0.927	0.126
18257	ENSMUSG00000037275.14	Gemin5	chr11	-	58165892	58166040	58165892	58165953	58167708	58167869	18257	193162	3,1	48,62	6,4	186	99	0.000255167	0.0145839	0.972,0.989	0.81,0.892	0.129
3642	ENSMUSG00000031278.12	Acsl4	chrX	-	142351378	142351908	142351378	142351615	142360386	142360436	3642	259208	97,69	141141	76,96	198	99	0.00105728	0.0433274	0.572,0.601	0.481,0.423	0.135
30196	ENSMUSG00000055296.14	Tmem245	chr4	-	56899025	56899171	56899025	56899136	56899305	56899428	30196	143147	2,5	86,88	12,14	134	99	2.30276e-06	0.000318036	0.981,0.956	0.841,0.823	0.136
2179	ENSMUSG00000028453.10	Fancg	chr4	-	43004743	43005033	43004743	43005008	43005210	43005277	2179	95,54	3,0	25,49	5,5	124	99	0.00078118	0.0349741	0.962,1.0	0.8,0.887	0.137
3956	ENSMUSG00000024727.9	Trpm6	chr19	+	18825750	18825879	18825790	18825879	18823332	18823479	3956	120104	3,1	60,57	9,7	139	99	2.31841e-05	0.00218904	0.966,0.987	0.826,0.853	0.137
6965	ENSMUSG00000067873.11	Htatsf1	chrX	+	57056886	57057204	57056890	57057204	57056499	57056654	6965	3,4	20,22	0,0	29,16	103	99	0.000632614	0.0295541	0.126,0.149	0.0,0.0	0.138
12324	ENSMUSG00000013236.17	Ptprs	chr17	-	56426386	56426653	56426386	56426455	56427938	56428132	12324	201216	1,0	47,49	4,4	198	99	2.9792e-05	0.00267208	0.99,1.0	0.855,0.86	0.138
17646	ENSMUSG00000055670.14	Zzef1	chr11	+	72873863	72873957	72873867	72873957	72872603	72872683	17646	105104	0,0	33,22	3,5	103	99	3.93536e-05	0.00332482	1.0,1.0	0.914,0.809	0.138
31962	ENSMUSG00000044037.15	Als2cl	chr9	+	110894295	110894685	110894565	110894685	110893986	110894160	31962	391410	37,25	216222	49,34	198	99	1.82141e-05	0.00183557	0.841,0.891	0.688,0.766	0.139
9645	ENSMUSG00000024170.15	Telo2	chr17	-	25113115	25113257	25113115	25113133	25114936	25115312	9645	128104	1,0	35,51	5,2	198	99	0.000321496	0.0173125	0.985,1.0	0.778,0.927	0.14
52051	ENSMUSG00000030655.15	Smg1	chr7	-	118195810	118196035	118195810	118195931	118198190	118198364	52051	263228	13,15	84,78	12,14	198	99	0.00101455	0.042155	0.91,0.884	0.778,0.736	0.14
10546	ENSMUSG00000022843.17	Clcn2	chr16	-	20712056	20712182	20712056	20712136	20712311	20712787	10546	203203	12,12	111107	16,27	145	99	3.08801e-05	0.0027422	0.92,0.92	0.826,0.73	0.142
10817	ENSMUSG00000060657.8	Marf1	chr16	-	14140182	14140372	14140182	14140309	14141642	14141801	10817	229180	3,3	24,61	4,5	162	99	0.000799744	0.0355093	0.979,0.973	0.786,0.882	0.142
5780	ENSMUSG00000028060.14	Khdc4	chr3	+	88709829	88709942	88709857	88709942	88708779	88708941	5780	378359	118123	173231	140110	127	99	0.000992773	0.0415072	0.714,0.695	0.491,0.621	0.148
12323	ENSMUSG00000013236.17	Ptprs	chr17	-	56426386	56426563	56426386	56426455	56427938	56428132	12323	196215	1,0	45,44	4,4	198	99	2.0463e-05	0.0020172	0.99,1.0	0.849,0.846	0.148
39019	ENSMUSG00000001750.16	Tcirg1	chr19	-	3898547	3898757	3898547	3898638	3898979	3899119	39019	11,13	0,0	36,23	5,1	198	99	0.000565924	0.0271825	1.0,1.0	0.783,0.92	0.148
45889	ENSMUSG00000070056.6	Mfhas1	chr8	+	35671603	35671831	35671721	35671831	35664667	35664794	45889	5,2	10,9	0,0	2,3	198	99	0.000817968	0.0361096	0.2,0.1	0.0,0.0	0.15
46773	ENSMUSG00000031015.8	Swap70	chr7	+	110225644	110225739	110225670	110225739	110221754	110221909	46773	5,1	11,17	0,0	5,12	125	99	0.00119518	0.0474765	0.265,0.045	0.0,0.0	0.155
29383	ENSMUSG00000041058.15	Wwp1	chr4	-	19672418	19672543	19672418	19672527	19673155	19673294	29383	147101	13,13	58,66	21,18	115	99	0.00014459	0.00923673	0.907,0.87	0.704,0.759	0.157
19737	ENSMUSG00000005682.9	Pan2	chr10	+	128315486	128315657	128315601	128315657	128315097	128315236	19737	91111	0,1	42,43	7,2	198	99	3.1557e-05	0.00277026	1.0,0.982	0.75,0.915	0.158
53842	ENSMUSG00000025404.15	R3hdm2	chr10	+	127492568	127492724	127492630	127492724	127487774	127487875	53842	74,69	0,0	21,18	6,0	161	99	0.000625728	0.0292833	1.0,1.0	0.683,1.0	0.158
19753	ENSMUSG00000021024.14	Psma6	chr12	+	55418205	55418310	55418307	55418310	55414403	55414498	19753	20,18	0,0	40,30	5,2	198	99	0.000342196	0.0181844	1.0,1.0	0.8,0.882	0.159
33081	ENSMUSG00000097781.1	9330136K24Rik	chr17	-	21534427	21534476	21534427	21534471	21535822	21535878	33081	4,1	0,0	18,18	8,0	104	99	0.00124766	0.0489542	1.0,1.0	0.682,1.0	0.159
30401	ENSMUSG00000029177.9	Cenpa	chr5	+	30673266	30673441	30673296	30673441	30672981	30673059	30401	40,45	2,1	83,79	16,16	129	99	8.25322e-05	0.0059164	0.939,0.972	0.799,0.791	0.16
39513	ENSMUSG00000039623.13	Ap5z1	chr5	+	142470393	142470556	142470438	142470556	142470289	142470327	39513	99,89	4,2	31,31	6,5	144	99	0.00107537	0.0438115	0.944,0.968	0.78,0.81	0.161
10761	ENSMUSG00000063358.17	Mapk1	chr16	+	17018285	17018475	17018379	17018475	16983566	16983739	10761	1,1	1,0	1,0	0,7	193	99	0.000435342	0.0222563	0.339,1.0	1.0,0.0	0.169
4420	ENSMUSG00000059713.12	Rcan3	chr4	-	135412307	135416598	135412307	135412490	135418379	135418551	4420	376308	9,8	132178	17,27	198	99	1.76909e-09	6.3363e-07	0.954,0.951	0.795,0.767	0.171
33039	ENSMUSG00000074829.10	2010315B03Rik	chr9	-	124311675	124311857	124311675	124311718	124312559	124312696	33039	19,22	0,0	21,22	0,6	198	99	0.000757396	0.0341368	1.0,1.0	1.0,0.647	0.176
39335	ENSMUSG00000025878.16	Uimc1	chr13	-	55076297	55076453	55076297	55076375	55077402	55077527	39335	20,15	0,0	26,24	8,0	177	99	0.000453247	0.0229507	1.0,1.0	0.645,1.0	0.177
41754	ENSMUSG00000030059.15	Tmf1	chr6	-	97158460	97158588	97158460	97158536	97160242	97160335	41754	99,78	5,2	38,75	9,13	151	99	8.37212e-05	0.00597333	0.928,0.962	0.735,0.791	0.182
33949	ENSMUSG00000110723.1	Gm49353	chr10	+	29218040	29218296	29218054	29218296	29198953	29199280	33949	7,6	24,27	0,0	2,4	113	99	0.000405849	0.0209858	0.204,0.163	0.0,0.0	0.183
3279	ENSMUSG00000041459.15	Tardbp	chr4	-	148617565	148617825	148617565	148617705	148618664	148618791	3279	16901460	140111	12081225	293292	198	99	0	0	0.858,0.868	0.673,0.677	0.188
3421	ENSMUSG00000031862.11	Atp13a1	chr8	+	69799761	69799937	69799831	69799937	69799320	69799478	3421	1188936	73,52	422427	105,88	169	99	0	0	0.905,0.913	0.702,0.74	0.188
19739	ENSMUSG00000005682.9	Pan2	chr10	+	128315491	128315657	128315601	128315657	128315097	128315236	19739	52,69	0,1	31,35	7,2	198	99	6.00507e-05	0.00456972	1.0,0.972	0.689,0.897	0.193
19758	ENSMUSG00000021024.14	Psma6	chr12	+	55418280	55418310	55418307	55418310	55414403	55414498	19758	21,14	0,0	19,16	5,2	126	99	0.000101512	0.00695628	1.0,1.0	0.749,0.863	0.194
39855	ENSMUSG00000074884.12	Serf2	chr2	+	121457591	121457701	121457645	121457701	121449974	121450083	39855	35,24	2,0	52,36	8,9	153	99	0.000444303	0.0226472	0.919,1.0	0.808,0.721	0.195
56935	ENSMUSG00000056919.9	Cep162	chr9	-	87217067	87217173	87217067	87217135	87218504	87218617	56935	113,84	3,2	30,18	8,3	137	99	7.03051e-05	0.00519552	0.965,0.968	0.73,0.813	0.195
15642	ENSMUSG00000024891.6	Slc29a2	chr19	+	5029211	5029320	5029251	5029320	5028840	5028971	15642	94,73	7,9	61,39	14,18	139	99	0.00069989	0.0322207	0.905,0.852	0.756,0.607	0.197
21484	ENSMUSG00000039765.15	Cc2d2a	chr5	+	43699938	43700079	43699942	43700079	43696581	43696632	21484	57,66	1,1	11,16	8,0	103	99	0.00114283	0.0459568	0.982,0.984	0.569,1.0	0.199
42069	ENSMUSG00000027379.13	Bub1	chr2	-	127817251	127817439	127817251	127817436	127819212	127819364	42069	2,5	11,11	1,0	16,8	102	99	0.000796402	0.0354488	0.15,0.306	0.057,0.0	0.199
5725	ENSMUSG00000036473.16	Tbc1d24	chr17	-	24183693	24183852	24183693	24183848	24185203	24186201	5725	55,55	0,0	21,15	2,7	103	99	5.30882e-06	0.000640935	1.0,1.0	0.91,0.673	0.208
38062	ENSMUSG00000070858.12	Gm1673	chr5	+	33983756	33984153	33984051	33984153	33983469	33983639	38062	214217	10,11	274231	56,51	198	99	6.60563e-10	2.6288e-07	0.915,0.908	0.71,0.694	0.21
830	ENSMUSG00000021916.16	Glt8d1	chr14	+	31004694	31004790	31004717	31004790	31001403	31001428	830	16,12	0,0	15,17	3,4	122	99	0.000203626	0.0121284	1.0,1.0	0.802,0.775	0.212
1840	ENSMUSG00000026988.15	Wdsub1	chr2	-	59861560	59861740	59861560	59861737	59862619	59862726	1840	103,85	37,36	29,38	26,40	102	99	0.000118093	0.00784246	0.73,0.696	0.52,0.48	0.213
58353	ENSMUSG00000010461.15	Eya4	chr10	-	23116552	23116713	23116552	23116645	23116819	23116878	58353	208180	12,11	60,50	10,19	167	99	4.03483e-05	0.00339767	0.911,0.907	0.781,0.609	0.214
19759	ENSMUSG00000021024.14	Psma6	chr12	+	55418283	55418310	55418307	55418310	55414403	55414498	19759	4,5	0,0	19,11	5,2	123	99	0.000288135	0.0158121	1.0,1.0	0.754,0.816	0.215
35586	ENSMUSG00000031392.18	Irak1	chrX	-	74017129	74017401	74017129	74017240	74018129	74018366	35586	5,2	7,5	0,0	8,8	198	99	0.000112779	0.0075738	0.263,0.167	0.0,0.0	0.215
51065	ENSMUSG00000038563.14	Efl1	chr7	+	82674367	82674544	82674404	82674544	82672809	82672947	51065	214209	17,16	68,71	18,29	136	99	1.00964e-07	2.14398e-05	0.902,0.905	0.733,0.641	0.216
44583	ENSMUSG00000048495.16	Tyw5	chr1	-	57393584	57393694	57393584	57393691	57394046	57394091	44583	3,8	0,0	17,10	1,6	102	99	0.000457645	0.0230864	1.0,1.0	0.943,0.618	0.22
11746	ENSMUSG00000022546.5	Gpt	chr15	+	76699004	76699348	76699235	76699348	76698714	76698889	11746	15,11	0,0	20,30	3,4	198	99	0.000232081	0.0135087	1.0,1.0	0.769,0.789	0.221
3278	ENSMUSG00000041459.15	Tardbp	chr4	-	148617565	148617737	148617565	148617705	148618664	148618791	3278	633516	140111	483470	293292	131	99	3.77476e-15	4.13875e-12	0.774,0.778	0.555,0.549	0.224
24288	ENSMUSG00000025967.16	Eef1b2	chr1	+	63179249	63179360	63179256	63179360	63178831	63178898	24288	14,14	0,1	14,27	6,7	106	99	0.00010732	0.00723437	1.0,0.929	0.685,0.783	0.231
7968	ENSMUSG00000047656.9	Trpt1	chr19	+	6998657	6998768	6998705	6998768	6998508	6998565	7968	35,44	1,3	18,22	4,8	147	99	0.000877225	0.0381232	0.959,0.908	0.752,0.649	0.233
43781	ENSMUSG00000041341.10	Atg2b	chr12	-	105648988	105649161	105648988	105649088	105649474	105649632	43781	192173	29,22	60,68	34,22	172	99	3.43275e-05	0.00297459	0.792,0.819	0.504,0.64	0.233
6635	ENSMUSG00000043384.15	Gprasp1	chrX	+	135750514	135750586	135750535	135750586	135748655	135748782	6635	3,9	8,9	0,1	4,3	120	99	0.00122863	0.0484287	0.236,0.452	0.0,0.216	0.236
28562	ENSMUSG00000028478.18	Clta	chr4	+	44025414	44025560	44025448	44025560	44018812	44018850	28562	23,34	0,2	31,32	5,14	133	99	8.07271e-05	0.0058451	1.0,0.927	0.822,0.63	0.238
47168	ENSMUSG00000049555.10	Tmie	chr9	-	110873795	110874177	110873795	110874098	110875627	110876021	47168	2,8	7,8	0,0	2,3	178	99	0.000106036	0.00718384	0.137,0.357	0.0,0.0	0.247
47213	ENSMUSG00000068394.4	Cep152	chr2	-	125614287	125614431	125614287	125614393	125618372	125618541	47213	8,2	9,5	1,1	10,15	137	99	0.000701105	0.032249	0.391,0.224	0.067,0.046	0.251
50536	ENSMUSG00000097415.2	AU020206	chr7	-	75769761	75770240	75769761	75770237	75780624	75780756	50536	5,1	6,15	0,0	15,21	102	99	0.000352318	0.0186669	0.447,0.061	0.0,0.0	0.254
33303	ENSMUSG00000049624.14	Slc17a5	chr9	-	78569569	78569944	78569569	78569920	78571021	78571108	33303	15,6	0,0	10,11	4,2	123	99	7.32275e-05	0.00535258	1.0,1.0	0.668,0.816	0.258
4	ENSMUSG00000031342.17	Gpm6b	chrX	+	166385390	166388988	166386951	166388988	166383934	166384000	4	279272	116123	122123	150175	198	99	1.21791e-13	1.02238e-10	0.546,0.525	0.289,0.26	0.261
55535	ENSMUSG00000031821.11	Gins2	chr8	-	120586092	120586214	120586092	120586192	120588925	120589304	55535	11,8	0,0	22,13	2,8	121	99	7.12586e-05	0.00524889	1.0,1.0	0.9,0.571	0.264
21093	ENSMUSG00000025047.9	Pdcd11	chr19	+	47092532	47092900	47092787	47092900	47090767	47090867	21093	12,4	9,5	0,1	11,3	198	99	1.65044e-05	0.00167935	0.4,0.286	0.0,0.143	0.271
39105	ENSMUSG00000079442.12	St6galnac4	chr2	+	32596820	32597189	32596834	32597189	32595693	32595801	39105	1,4	4,6	0,0	1,2	113	99	0.000384547	0.0200873	0.18,0.369	0.0,0.0	0.274
46995	ENSMUSG00000020899.16	Pfas	chr11	-	69000873	69001339	69000873	69001277	69001732	69001838	46995	12,11	1,0	10,13	4,3	161	99	0.000645554	0.0300541	0.881,1.0	0.606,0.727	0.274
55061	ENSMUSG00000031818.12	Cox4i1	chr8	+	120672728	120672885	120672738	120672885	120669308	120669382	55061	5,1	0,0	7,11	3,3	109	99	0.000201322	0.0120045	1.0,1.0	0.679,0.769	0.276
35894	ENSMUSG00000021470.19	Ercc6l2	chr13	+	63848747	63848860	63848781	63848860	63847340	63847454	35894	21,22	0,0	10,15	5,2	133	99	3.02493e-05	0.00270406	1.0,1.0	0.598,0.848	0.277
20803	ENSMUSG00000049606.16	Zfp644	chr5	-	106690603	106690877	106690603	106690873	106695642	106695699	20803	13,15	0,0	12,6	5,2	103	99	3.865e-05	0.00328556	1.0,1.0	0.698,0.742	0.28
22891	ENSMUSG00000028798.16	Eif3i	chr4	-	129591959	129592165	129591959	129592128	129592266	129592359	22891	3,2	3,9	0,0	18,6	136	99	0.00103072	0.0426622	0.421,0.139	0.0,0.0	0.28
33597	ENSMUSG00000023938.8	Aars2	chr17	+	45514784	45515065	45514922	45515065	45514491	45514637	33597	120,91	8,5	13,35	4,12	198	99	7.08166e-05	0.00522613	0.882,0.901	0.619,0.593	0.285
4430	ENSMUSG00000029510.15	Gpc2	chr5	-	138278214	138278537	138278214	138278454	138278838	138278997	4430	88,81	32,40	38,31	66,39	182	99	3.62853e-08	8.4027e-06	0.599,0.524	0.238,0.302	0.291
17107	ENSMUSG00000020546.14	Stxbp4	chr11	-	90621654	90621748	90621654	90621732	90622191	90622261	17107	12,8	0,0	5,6	2,2	115	99	0.00100422	0.0418555	1.0,1.0	0.683,0.721	0.298
30726	ENSMUSG00000026626.11	Ppp2r5a	chr1	-	191358924	191359079	191358924	191359068	191362248	191362341	30726	4,1	9,2	0,0	3,4	110	99	0.000793214	0.0353362	0.286,0.31	0.0,0.0	0.298
53840	ENSMUSG00000025404.15	R3hdm2	chr10	+	127492314	127492724	127492630	127492724	127487774	127487875	53840	11,14	0,0	8,6	6,0	198	99	0.000933537	0.0397716	1.0,1.0	0.4,1.0	0.3
57332	ENSMUSG00000020253.15	Ppm1m	chr9	-	106197534	106197897	106197534	106197823	106198100	106198338	57332	29,27	1,1	14,24	5,7	173	99	0.000133757	0.00862675	0.943,0.939	0.616,0.662	0.302
18271	ENSMUSG00000037331.15	Larp1	chr11	+	58049663	58050089	58049699	58050089	58047976	58048146	18271	12,11	13,9	0,1	7,2	135	99	0.000118338	0.00784901	0.404,0.473	0.0,0.268	0.304
24978	ENSMUSG00000028080.16	Lrba	chr3	+	86775997	86776194	86776000	86776194	86773099	86773201	24978	35,41	0,2	4,5	1,4	102	99	0.000930224	0.0396952	1.0,0.952	0.795,0.548	0.304
50079	ENSMUSG00000096054.3	Syne1	chr10	-	5157620	5157759	5157620	5157734	5161451	5161561	50079	58,45	2,1	14,7	6,3	124	99	2.3438e-05	0.00220176	0.959,0.973	0.651,0.651	0.315
51079	ENSMUSG00000032363.15	Adamts7	chr9	+	90180624	90180771	90180700	90180771	90179322	90179472	51079	82,48	18,14	24,26	26,22	175	99	2.73584e-06	0.000369305	0.72,0.66	0.343,0.401	0.318
14176	ENSMUSG00000034789.8	Rab24	chr13	-	55319742	55320205	55319742	55320165	55320311	55320374	14176	3,6	4,10	0,0	5,4	139	99	2.92816e-05	0.00263192	0.348,0.299	0.0,0.0	0.324
16070	ENSMUSG00000025137.15	Pcyt2	chr11	-	120611112	120611473	120611112	120611178	120611627	120612109	16070	14,14	0,0	19,11	2,5	198	99	2.41234e-05	0.00224615	1.0,1.0	0.826,0.524	0.325
27930	ENSMUSG00000059851.15	Kmt5c	chr7	+	4745708	4745908	4745837	4745908	4743246	4743266	27930	1,5	2,3	0,0	7,2	198	99	4.88058e-05	0.00390055	0.2,0.455	0.0,0.0	0.328
4782	ENSMUSG00000060771.14	Tsga10	chr1	-	37841184	37841352	37841184	37841308	37842454	37842520	4782	19,16	3,0	7,18	3,11	143	99	0.000717263	0.0328516	0.814,1.0	0.618,0.531	0.333
50599	ENSMUSG00000087159.7	Gm15246	chrX	+	169323001	169323101	169323004	169323101	169322749	169322842	50599	2,6	0,0	5,5	1,5	102	99	5.88498e-05	0.00449745	1.0,1.0	0.829,0.493	0.339
57172	ENSMUSG00000037286.15	Stag1	chr9	+	100663228	100663298	100663249	100663298	100643769	100643796	57172	4,2	5,4	0,0	3,3	120	99	4.32518e-05	0.00358429	0.398,0.292	0.0,0.0	0.345
42797	ENSMUSG00000025995.16	Wdr75	chr1	+	45818683	45818917	45818721	45818917	45818169	45818264	42797	5,7	0,0	12,7	6,2	137	99	1.02358e-05	0.00112244	1.0,1.0	0.591,0.717	0.346
56944	ENSMUSG00000017167.6	Cntnap1	chr11	+	101178814	101178999	101178818	101178999	101178235	101178439	56944	17,30	0,0	10,5	3,4	103	99	5.64506e-06	0.000677378	1.0,1.0	0.762,0.546	0.346
14410	ENSMUSG00000042167.6	Tent2	chr13	-	93148365	93148473	93148365	93148459	93148880	93148960	14410	4,1	4,3	0,0	4,2	113	99	0.000142006	0.00912532	0.467,0.226	0.0,0.0	0.347
12163	ENSMUSG00000096883.2	Shisa8	chr15	-	82207193	82207593	82207193	82207590	82207750	82207897	12163	1,3	2,5	0,0	2,1	102	99	0.00117142	0.0468625	0.327,0.368	0.0,0.0	0.348
24748	ENSMUSG00000028453.10	Fancg	chr4	-	43005206	43005374	43005206	43005312	43006461	43006613	24748	5,2	0,0	4,7	1,3	161	99	0.000966762	0.0408007	1.0,1.0	0.711,0.589	0.35
10574	ENSMUSG00000003235.13	Eif2b5	chr16	+	20504588	20504790	20504640	20504790	20502529	20502842	10574	2,8	0,0	6,4	3,1	151	99	0.000970761	0.040867	1.0,1.0	0.567,0.724	0.355
10543	ENSMUSG00000022843.17	Clcn2	chr16	-	20711689	20712169	20711689	20712136	20712311	20712787	10543	29,16	12,12	5,11	16,27	132	99	5.08784e-05	0.00401977	0.644,0.5	0.19,0.234	0.36
27169	ENSMUSG00000071291.10	Zfp58	chr13	-	67499901	67499970	67499901	67499917	67500370	67500555	27169	4,3	0,1	10,7	13,3	152	99	0.000785115	0.0350914	1.0,0.661	0.334,0.603	0.362
27168	ENSMUSG00000071291.10	Zfp58	chr13	-	67499901	67499960	67499901	67499917	67500370	67500555	27168	4,3	0,1	7,9	13,3	142	99	0.000912103	0.0391083	1.0,0.677	0.273,0.677	0.363
53959	ENSMUSG00000036120.10	Rfxank	chr8	-	70135290	70135772	70135290	70135614	70136209	70136290	53959	10,8	0,1	7,17	7,3	198	99	0.000461861	0.0232772	1.0,0.8	0.333,0.739	0.364
8265	ENSMUSG00000024481.5	Lvrn	chr18	+	46876882	46877037	46876910	46877037	46873781	46873908	8265	4,2	0,0	6,5	2,3	127	99	0.000120387	0.00794568	1.0,1.0	0.7,0.565	0.368
43309	ENSMUSG00000045751.16	Mms22l	chr4	+	24496831	24497044	24496841	24497044	24496464	24496634	43309	8,10	0,0	22,8	8,6	109	99	4.16919e-06	0.000519698	1.0,1.0	0.714,0.548	0.369
57042	ENSMUSG00000022744.12	Cldnd1	chr16	+	58729442	58729747	58729502	58729747	58728047	58728084	57042	3,13	0,0	5,6	2,2	159	99	0.000494477	0.0246494	1.0,1.0	0.609,0.651	0.37
14012	ENSMUSG00000015478.13	Rnf5	chr17	-	34601740	34601963	34601740	34601858	34602084	34602197	14012	8,6	0,0	12,12	9,1	198	99	2.18844e-05	0.00211084	1.0,1.0	0.4,0.857	0.371
24534	ENSMUSG00000028333.10	Anp32b	chr4	+	46469885	46469968	46469897	46469968	46468558	46468787	24534	17,15	0,0	9,5	23,0	111	99	0.000507427	0.0251258	1.0,1.0	0.259,1.0	0.371
39205	ENSMUSG00000051586.16	Mical3	chr6	-	120973402	120973647	120973402	120973644	120982531	120982727	39205	50,62	7,13	6,6	6,7	102	99	0.000233796	0.0135655	0.874,0.822	0.493,0.454	0.374
10430	ENSMUSG00000022801.13	Lrch3	chr16	+	32988425	32988481	32988433	32988481	32986738	32986888	10430	8,7	9,6	1,1	9,7	107	99	0.000405611	0.0209858	0.451,0.519	0.093,0.117	0.38
36816	ENSMUSG00000052144.8	Ppp4r2	chr6	+	100865798	100865987	100865849	100865987	100865073	100865217	36816	3,3	0,1	3,2	4,1	150	99	0.00120754	0.0478078	1.0,0.664	0.331,0.569	0.382
33444	ENSMUSG00000040721.9	Zfhx2	chr14	-	55072546	55073064	55072546	55072974	55073212	55075284	33444	10,5	0,0	5,6	9,0	189	99	0.00113379	0.0457649	1.0,1.0	0.225,1.0	0.387
52036	ENSMUSG00000030655.15	Smg1	chr7	-	118168607	118168742	118168607	118168684	118168857	118169002	52036	14,22	0,1	5,8	4,2	157	99	8.81004e-05	0.0062034	1.0,0.933	0.441,0.716	0.388
36043	ENSMUSG00000025968.16	Ndufs1	chr1	-	63147289	63147424	63147289	63147417	63149956	63150111	36043	17,10	2,0	13,6	5,9	106	99	0.000199913	0.0119337	0.888,1.0	0.708,0.384	0.398
27171	ENSMUSG00000071291.10	Zfp58	chr13	-	67499901	67500005	67499901	67499917	67500370	67500555	27171	5,7	0,1	11,12	13,3	187	99	0.000384444	0.0200873	1.0,0.787	0.309,0.679	0.399
20039	ENSMUSG00000054452.10	Aes	chr10	+	81564812	81564910	81564820	81564910	81564672	81564717	20039	18,5	0,0	4,3	1,4	107	99	9.48597e-05	0.00659283	1.0,1.0	0.787,0.41	0.401
39136	ENSMUSG00000025510.14	Cd151	chr7	+	141470085	141470136	141470101	141470136	141469936	141470011	39136	5,1	0,1	2,1	7,1	115	99	0.00023411	0.013568	1.0,0.463	0.197,0.463	0.402
13473	ENSMUSG00000021816.11	Ppp3cb	chr14	-	20523778	20524095	20523778	20523856	20524356	20524502	13473	7,7	0,0	10,9	5,2	198	99	3.75012e-06	0.000477492	1.0,1.0	0.5,0.692	0.404
18930	ENSMUSG00000020473.13	Aebp1	chr11	+	5862744	5862972	5862940	5862972	5861946	5862398	18930	7,6	0,0	9,4	2,2	198	99	0.000803341	0.0356395	1.0,1.0	0.692,0.5	0.404
27170	ENSMUSG00000071291.10	Zfp58	chr13	-	67499901	67499991	67499901	67499917	67500370	67500555	27170	5,6	0,1	12,8	13,3	173	99	0.000223489	0.0131511	1.0,0.774	0.346,0.604	0.412
49882	ENSMUSG00000038535.17	Zfp280d	chr9	+	72301683	72302006	72301866	72302006	72298726	72298848	49882	2,8	0,1	14,7	9,3	198	99	0.000533424	0.0260057	1.0,0.8	0.438,0.538	0.412
10433	ENSMUSG00000014075.15	Tctex1d2	chr16	+	32425240	32426921	32426857	32426921	32422819	32422965	10433	6,3	0,0	4,8	1,4	198	99	2.24404e-05	0.0021376	1.0,1.0	0.667,0.5	0.416
13933	ENSMUSG00000021576.6	Pdcd6	chr13	-	74304953	74305135	74304953	74305006	74305540	74305838	13933	4,1	2,1	0,0	3,1	198	99	0.000141417	0.00909895	0.5,0.333	0.0,0.0	0.416
50299	ENSMUSG00000030796.17	Tead2	chr7	+	45225630	45225795	45225652	45225795	45220642	45220701	50299	8,6	6,5	1,1	7,10	121	99	9.90162e-05	0.00683759	0.522,0.495	0.105,0.076	0.418
16879	ENSMUSG00000001441.13	Npepps	chr11	-	97231888	97232022	97231888	97231996	97235054	97235115	16879	8,8	0,0	9,2	1,4	125	99	0.00040712	0.0210313	1.0,1.0	0.877,0.284	0.419
7622	ENSMUSG00000024970.5	Spindoc	chr19	-	7374021	7374464	7374021	7374147	7374520	7374850	7622	8,3	0,0	15,3	1,4	198	99	0.000251926	0.0144447	1.0,1.0	0.882,0.273	0.422
56038	ENSMUSG00000022359.10	Wdyhv1	chr15	+	58155138	58155325	58155143	58155325	58153579	58153704	56038	11,11	1,0	5,2	1,6	104	99	0.000324353	0.0174433	0.913,1.0	0.826,0.241	0.423
49553	ENSMUSG00000028247.2	Coq3	chr4	+	21881087	21881204	21881134	21881204	21879672	21879796	49553	2,5	0,0	4,2	2,1	146	99	0.00125989	0.0492631	1.0,1.0	0.576,0.576	0.424
12583	ENSMUSG00000002496.10	Tsc2	chr17	-	24597891	24598365	24597891	24598323	24599024	24599111	12583	3,2	1,0	3,1	3,1	141	99	0.00119318	0.0474765	0.678,1.0	0.412,0.413	0.426
19904	ENSMUSG00000035529.10	Prdm4	chr10	-	85893406	85893463	85893406	85893437	85899174	85899343	19904	8,5	2,9	0,1	3,3	125	99	0.000512764	0.0252736	0.76,0.306	0.0,0.209	0.429
5057	ENSMUSG00000042826.13	Fgf11	chr11	-	69798563	69798762	69798563	69798678	69799351	69799455	5057	3,4	1,0	5,3	4,3	183	99	0.000744734	0.0337644	0.619,1.0	0.403,0.351	0.432
33225	ENSMUSG00000002957.11	Ap2a2	chr7	+	141620839	141621023	141620898	141621023	141620471	141620569	33225	4,7	3,2	0,1	5,2	158	99	7.24398e-05	0.00530945	0.455,0.687	0.0,0.239	0.452
28201	ENSMUSG00000037364.12	Srrt	chr5	-	137299748	137300140	137299748	137300101	137300243	137300731	28201	3,2	0,0	3,4	4,1	138	99	3.22688e-05	0.00281893	1.0,1.0	0.35,0.742	0.454
25633	ENSMUSG00000000058.6	Cav2	chr6	+	17281854	17282045	17281898	17282045	17281358	17281510	25633	6,2	1,0	2,2	1,3	143	99	0.000866993	0.0377771	0.806,1.0	0.581,0.316	0.455
28973	ENSMUSG00000028232.13	Tmem68	chr4	-	3562019	3562146	3562019	3562143	3564092	3564257	28973	4,1	2,1	1,0	3,1	102	99	0.000972882	0.040867	0.66,0.493	0.244,0.0	0.455
32063	ENSMUSG00000041763.14	Tpp2	chr1	+	43972555	43972687	43972594	43972687	43971563	43971732	32063	10,16	0,1	5,8	5,4	138	99	1.06197e-05	0.00115495	1.0,0.92	0.418,0.589	0.457
12431	ENSMUSG00000022016.16	Akap11	chr14	-	78514806	78515069	78514806	78514994	78516322	78516457	12431	4,2	1,4	0,0	1,3	174	99	6.09466e-05	0.00463133	0.695,0.221	0.0,0.0	0.458
29111	ENSMUSG00000038733.14	Wdr26	chr1	-	181197574	181197713	181197574	181197687	181198846	181198944	29111	19,28	4,4	4,7	11,6	125	99	8.17274e-05	0.00589467	0.79,0.847	0.224,0.48	0.467
40304	ENSMUSG00000039834.17	Zfp335	chr2	-	164900277	164900643	164900277	164900515	164901417	164901530	40304	10,10	1,0	2,9	4,2	198	99	0.000271049	0.0151636	0.833,1.0	0.2,0.692	0.471
13313	ENSMUSG00000021916.16	Glt8d1	chr14	+	31004588	31004790	31004717	31004790	31001403	31001428	13313	9,3	0,0	6,10	3,4	198	99	5.68053e-06	0.000679643	1.0,1.0	0.5,0.556	0.472
57480	ENSMUSG00000025650.13	Col7a1	chr9	+	108957219	108957326	108957224	108957326	108956986	108957136	57480	2,4	1,9	0,0	2,5	104	99	4.91521e-05	0.00391214	0.656,0.297	0.0,0.0	0.477
6442	ENSMUSG00000010476.14	Ebf3	chr7	-	137198491	137198689	137198491	137198581	137200382	137200560	6442	4,7	3,1	1,0	2,2	198	99	0.000270341	0.0151608	0.4,0.778	0.2,0.0	0.489
2770	ENSMUSG00000039742.15	Fam71f1	chr6	+	29330642	29330686	29330648	29330686	29326572	29326694	2770	6,5	7,4	0,0	3,5	105	99	1.90498e-06	0.000270039	0.447,0.541	0.0,0.0	0.494
57356	ENSMUSG00000038578.15	Susd1	chr4	-	59329462	59329721	59329462	59329659	59332936	59333033	57356	1,1	0,0	8,12	6,6	161	99	1.54021e-05	0.00158789	1.0,1.0	0.451,0.552	0.498
8918	ENSMUSG00000023952.13	Gtpbp2	chr17	+	46165773	46165997	46165822	46165997	46165454	46165629	8918	1,8	0,0	1,0	0,3	148	99	0.000577453	0.0276503	1.0,1.0	1.0,0.0	0.5
26486	ENSMUSG00000045327.7	6330549D23Rik	chr3	-	96624526	96624630	96624526	96624627	96629457	96629820	26486	1,2	0,0	0,1	4,0	102	99	0.000792157	0.0353184	1.0,1.0	0.0,1.0	0.5
31614	ENSMUSG00000034854.8	Mfsd12	chr10	+	81360121	81360292	81360200	81360292	81357551	81357886	31614	1,1	0,0	0,1	7,0	178	99	4.60857e-05	0.00374577	1.0,1.0	0.0,1.0	0.5
33239	ENSMUSG00000020917.17	Acly	chr11	-	100492504	100492996	100492504	100492851	100493536	100493618	33239	3,5	0,0	0,1	2,0	198	99	0.00119564	0.0474765	1.0,1.0	0.0,1.0	0.5
36929	ENSMUSG00000058135.12	Gstm1	chr3	-	108014944	108015145	108014944	108015037	108016327	108016428	36929	4,2	0,0	0,1	6,0	198	99	4.72385e-05	0.00379923	1.0,1.0	0.0,1.0	0.5
45722	ENSMUSG00000045983.16	Eif4g1	chr16	+	20686762	20686859	20686780	20686859	20686539	20686631	45722	1,2	1,0	0,2	1,2	117	99	0.000901823	0.0388008	0.458,1.0	0.0,0.458	0.5
52971	ENSMUSG00000037519.17	Ppfia1	chr7	-	144481084	144481430	144481084	144481316	144481710	144481779	52971	1,4	0,0	1,0	0,2	198	99	0.00119564	0.0474765	1.0,1.0	1.0,0.0	0.5
57072	ENSMUSG00000032411.15	Tfdp2	chr9	+	96202321	96202764	96202624	96202764	96202155	96202188	57072	1,1	0,0	1,0	0,4	198	99	0.000116873	0.00777665	1.0,1.0	1.0,0.0	0.5
57647	ENSMUSG00000038775.14	Vill	chr9	+	119064875	119065277	119065236	119065277	119063601	119063702	57647	4,5	1,0	7,1	4,2	198	99	0.000671885	0.0310646	0.667,1.0	0.467,0.2	0.5
1273	ENSMUSG00000022286.16	Grhl2	chr15	+	37344652	37344747	37344655	37344747	37337772	37337804	1273	1,1	0,0	1,2	1,2	102	99	0.000835027	0.0366818	1.0,1.0	0.493,0.493	0.507
54100	ENSMUSG00000046295.13	Ankle1	chr8	+	71407212	71407749	71407618	71407749	71406861	71406973	54100	13,8	1,2	5,4	11,4	198	99	0.000128681	0.00834949	0.867,0.667	0.185,0.333	0.508
16404	ENSMUSG00000018861.8	Fdxr	chr11	-	115269696	115270181	115269696	115269896	115270322	115270430	16404	1,3	0,1	2,1	1,6	198	99	0.00106351	0.0434833	1.0,0.6	0.5,0.077	0.512
49554	ENSMUSG00000028247.2	Coq3	chr4	+	21881087	21881204	21881173	21881204	21879672	21879796	49554	2,5	0,0	4,3	4,1	185	99	4.12576e-06	0.000515481	1.0,1.0	0.349,0.616	0.518
47624	ENSMUSG00000084950.7	Gm5577	chr6	+	87983894	87984172	87983924	87984172	87982959	87983108	47624	5,2	0,0	1,9	4,2	129	99	2.0322e-05	0.00200699	1.0,1.0	0.161,0.775	0.532
27332	ENSMUSG00000097145.5	9230114K14Rik	chr5	+	52194797	52194890	52194800	52194890	52190712	52190937	27332	2,3	4,1	0,0	6,4	102	99	2.98965e-05	0.00267698	0.327,0.744	0.0,0.0	0.535
56818	ENSMUSG00000005505.12	Kbtbd4	chr2	+	90905418	90905617	90905440	90905617	90904768	90904909	56818	6,2	3,2	0,0	5,2	121	99	5.94384e-07	0.000101055	0.621,0.45	0.0,0.0	0.535
16152	ENSMUSG00000039976.4	Tbc1d16	chr11	-	119175346	119175394	119175346	119175391	119208770	119209368	16152	4,13	2,3	2,0	3,4	102	99	0.00063417	0.0295754	0.66,0.808	0.393,0.0	0.537
19443	ENSMUSG00000034667.8	Xpot	chr10	-	121602230	121602414	121602230	121602396	121603028	121603314	19443	6,6	0,0	2,2	1,4	117	99	7.18092e-06	0.000824348	1.0,1.0	0.629,0.297	0.537
31349	ENSMUSG00000037533.19	Rapgef6	chr11	+	54687543	54687654	54687588	54687654	54683891	54684026	31349	9,9	2,3	1,2	3,7	144	99	0.00013065	0.00846705	0.756,0.673	0.186,0.164	0.54
20400	ENSMUSG00000035722.15	Abca7	chr10	+	80013557	80013760	80013670	80013760	80013311	80013418	20400	6,3	1,0	1,1	1,1	198	99	0.000511186	0.0252375	0.75,1.0	0.333,0.333	0.542
5731	ENSMUSG00000066235.7	Pomgnt2	chr9	-	121995066	121995117	121995066	121995113	121995875	121996009	5731	4,2	3,1	1,0	7,7	103	99	4.29983e-05	0.00357598	0.562,0.658	0.121,0.0	0.55
25025	ENSMUSG00000034973.16	Dop1a	chr9	+	86512557	86513179	86512560	86513179	86510614	86510751	25025	6,5	0,1	2,2	2,7	102	99	1.071e-05	0.00116241	1.0,0.829	0.493,0.217	0.559
9462	ENSMUSG00000024193.8	Phf1	chr17	+	26936962	26937134	26937056	26937134	26936770	26936865	9462	6,5	0,1	2,2	3,2	193	99	8.42639e-05	0.00600408	1.0,0.719	0.255,0.339	0.562
37432	ENSMUSG00000015961.8	Adss	chr1	-	177772071	177772184	177772071	177772172	177773574	177773701	37432	5,2	0,0	1,2	3,1	111	99	0.000155911	0.00980002	1.0,1.0	0.229,0.641	0.565
13472	ENSMUSG00000021816.11	Ppp3cb	chr14	-	20523778	20524091	20523778	20523856	20524356	20524502	13472	4,4	0,0	11,2	5,2	198	99	8.04118e-07	0.000131711	1.0,1.0	0.524,0.333	0.572
16596	ENSMUSG00000002320.15	Tm9sf1	chr14	-	55637858	55638096	55637858	55638070	55640384	55640570	16596	7,8	0,0	7,0	1,4	125	99	0.000197502	0.0118424	1.0,1.0	0.847,0.0	0.577
31133	ENSMUSG00000025538.15	Sumf2	chr5	+	129854639	129854748	129854694	129854748	129854022	129854067	31133	9,1	0,0	5,6	6,4	154	99	1.74413e-07	3.4834e-05	1.0,1.0	0.349,0.491	0.58
7741	ENSMUSG00000038274.13	Fau	chr19	+	6059332	6059486	6059360	6059486	6059143	6059199	7741	2,3	0,0	5,1	6,1	127	99	3.08068e-06	0.000406658	1.0,1.0	0.394,0.438	0.584
9684	ENSMUSG00000079641.3	Rpl39	chrX	-	37083984	37084240	37083984	37084125	37085124	37085402	9684	2,2	0,0	4,2	2,2	198	99	6.43714e-05	0.00485865	1.0,1.0	0.5,0.333	0.584
40865	ENSMUSG00000040952.16	Rps19	chr7	+	24887168	24887636	24887538	24887636	24885451	24885552	40865	2,4	5,0	0,0	4,2	198	99	0.000421746	0.0216412	0.167,1.0	0.0,0.0	0.584
9685	ENSMUSG00000079641.3	Rpl39	chrX	-	37083984	37084360	37083984	37084125	37085124	37085402	9685	2,3	0,0	6,1	2,2	198	99	0.000114615	0.00766835	1.0,1.0	0.6,0.2	0.6
32064	ENSMUSG00000041763.14	Tpp2	chr1	+	43972565	43972687	43972594	43972687	43971563	43971732	32064	9,10	0,1	1,6	5,4	128	99	7.42359e-06	0.000846778	1.0,0.886	0.134,0.537	0.608
43034	ENSMUSG00000074579.14	Lekr1	chr3	+	65669503	65669613	65669507	65669613	65669089	65669178	43034	3,4	0,0	1,6	4,4	103	99	8.74585e-07	0.000141955	1.0,1.0	0.194,0.59	0.608
22142	ENSMUSG00000029064.15	Gnb1	chr4	+	155557372	155557653	155557375	155557653	155557170	155557286	22142	10,7	0,1	1,1	2,2	102	99	4.08046e-05	0.00342002	1.0,0.872	0.327,0.327	0.609
18113	ENSMUSG00000020537.9	Drg2	chr11	+	60462165	60462271	60462175	60462271	60461513	60461604	18113	4,3	1,1	1,1	10,4	109	99	1.7733e-05	0.00179417	0.784,0.732	0.083,0.185	0.624
36995	ENSMUSG00000020368.15	Canx	chr11	-	50311654	50312109	50311654	50312086	50325492	50325673	36995	3,3	2,1	0,0	3,3	122	99	1.44547e-06	0.000216921	0.549,0.709	0.0,0.0	0.629
46607	ENSMUSG00000039205.16	Ciz1	chr2	+	32370800	32371101	32370868	32371101	32370241	32370344	46607	6,8	1,1	6,0	7,6	167	99	0.000122136	0.00801944	0.781,0.826	0.337,0.0	0.635
41025	ENSMUSG00000040479.11	Dgkz	chr2	-	91939909	91940405	91939909	91940339	91940604	91940676	41025	7,11	0,1	2,3	3,4	165	99	3.37782e-06	0.000439403	1.0,0.868	0.286,0.31	0.636
43833	ENSMUSG00000067274.10	Rplp0	chr5	+	115562445	115562505	115562458	115562505	115561332	115561518	43833	2,3	0,7	0,0	4,6	112	99	0.000276002	0.015382	1.0,0.275	0.0,0.0	0.637
47625	ENSMUSG00000084950.7	Gm5577	chr6	+	87983899	87984172	87983924	87984172	87982959	87983108	47625	2,1	0,0	1,3	4,2	124	99	5.00726e-07	8.65e-05	1.0,1.0	0.166,0.545	0.644
43819	ENSMUSG00000067274.10	Rplp0	chr5	+	115560800	115560952	115560836	115560952	115559786	115559888	43819	4,1	0,0	3,3	4,4	135	99	1.3688e-06	0.000207737	1.0,1.0	0.355,0.355	0.645
23652	ENSMUSG00000063849.6	Ppcdc	chr9	-	57385094	57385377	57385094	57385367	57398760	57398845	23652	2,1	0,0	3,1	3,3	109	99	6.55836e-07	0.000110454	1.0,1.0	0.476,0.232	0.646
41985	ENSMUSG00000062604.11	Srpk2	chr5	-	23620754	23620926	23620754	23620836	23629331	23629477	41985	5,1	0,0	4,3	6,2	189	99	1.8223e-08	4.5964e-06	1.0,1.0	0.259,0.44	0.65
50794	ENSMUSG00000028949.13	Smarcd3	chr5	-	24601135	24601268	24601135	24601265	24601780	24602012	50794	4,5	1,0	2,0	2,2	102	99	9.40287e-05	0.00656064	0.795,1.0	0.493,0.0	0.651
14388	ENSMUSG00000069259.10	Prl6a1	chr13	+	27315278	27315457	27315281	27315457	27312626	27312692	14388	2,3	0,0	7,0	3,4	102	99	5.69269e-06	0.000679643	1.0,1.0	0.694,0.0	0.653
35351	ENSMUSG00000039318.12	Rab3gap2	chr1	+	185260376	185260498	185260404	185260498	185259313	185259527	35351	5,9	5,1	0,0	6,4	127	99	1.34791e-07	2.79601e-05	0.438,0.875	0.0,0.0	0.656
34195	ENSMUSG00000037022.3	Mmaa	chr8	-	79284208	79284446	79284208	79284418	79294913	79294937	34195	1,2	0,0	0,5	2,2	127	99	0.00017408	0.010713	1.0,1.0	0.0,0.661	0.669
23010	ENSMUSG00000041530.16	Ago1	chr4	-	126460366	126460678	126460366	126460585	126460905	126461087	23010	2,1	0,1	0,0	3,4	192	99	0.000484426	0.0242326	1.0,0.34	0.0,0.0	0.67
33687	ENSMUSG00000026135.17	Zfp142	chr1	-	74579324	74579927	74579324	74579676	74585383	74585697	33687	11,9	0,3	2,0	3,1	198	99	0.000595486	0.028337	1.0,0.6	0.25,0.0	0.675
19096	ENSMUSG00000086049.1	Gm12735	chr11	-	3193515	3193714	3193515	3193702	3193811	3194263	19096	13,3	0,0	0,4	2,2	111	99	0.000176299	0.0108248	1.0,1.0	0.0,0.641	0.679
35972	ENSMUSG00000028896.13	Rcc1	chr4	-	132335418	132335873	132335418	132335855	132337730	132337910	35972	2,3	3,0	0,0	4,2	117	99	1.48553e-05	0.0015467	0.361,1.0	0.0,0.0	0.68
26306	ENSMUSG00000036810.16	Cnep1r1	chr8	+	88130263	88130401	88130340	88130401	88129694	88129804	26306	4,3	0,0	2,2	2,3	176	99	1.27929e-06	0.000195811	1.0,1.0	0.36,0.273	0.683
40947	ENSMUSG00000020064.9	Herc4	chr10	+	63283184	63283341	63283212	63283341	63278402	63278465	40947	5,3	1,0	1,2	3,6	127	99	5.64849e-06	0.000677378	0.796,1.0	0.206,0.206	0.692
34136	ENSMUSG00000056167.7	Cnot10	chr9	-	114591515	114591681	114591515	114591669	114597478	114598835	34136	3,7	0,1	0,1	2,1	111	99	1.20825e-05	0.00128796	1.0,0.862	0.0,0.471	0.696
21918	ENSMUSG00000024640.9	Psat1	chr19	-	15916838	15917279	15916838	15917240	15918205	15918411	21918	4,1	2,0	0,1	3,3	138	99	0.000173495	0.010699	0.589,1.0	0.0,0.193	0.698
30844	ENSMUSG00000022771.17	Ppil2	chr16	-	17107288	17107781	17107288	17107443	17109644	17109694	30844	2,5	0,0	0,3	5,1	198	99	1.10255e-07	2.31385e-05	1.0,1.0	0.0,0.6	0.7
54180	ENSMUSG00000003037.16	Rab8a	chr8	+	72176101	72176388	72176275	72176388	72175839	72175929	54180	4,1	1,0	4,0	6,1	198	99	0.00052333	0.0256766	0.667,1.0	0.25,0.0	0.709
55760	ENSMUSG00000052738.14	Suclg1	chr6	+	73252276	73252547	73252281	73252547	73248667	73248753	55760	3,2	4,0	0,0	8,3	104	99	2.15072e-05	0.00209325	0.417,1.0	0.0,0.0	0.709
9683	ENSMUSG00000079641.3	Rpl39	chrX	-	37083984	37084171	37083984	37084125	37085124	37085402	9683	4,4	0,0	4,0	2,2	145	99	4.58769e-05	0.00373445	1.0,1.0	0.577,0.0	0.712
54190	ENSMUSG00000006276.10	Eps15l1	chr8	-	72382326	72382763	72382326	72382760	72384766	72384924	54190	6,6	0,0	4,0	3,1	102	99	0.000892658	0.0385826	1.0,1.0	0.564,0.0	0.718
33399	ENSMUSG00000044783.16	Hjurp	chr1	-	88266348	88266650	88266348	88266594	88267947	88268026	33399	2,1	0,0	2,0	1,2	155	99	0.000176586	0.01083	1.0,1.0	0.561,0.0	0.72
56513	ENSMUSG00000032400.18	Zwilch	chr9	-	64146824	64146938	64146824	64146920	64147367	64147376	56513	3,1	1,0	0,2	2,5	117	99	5.91676e-05	0.00451114	0.717,1.0	0.0,0.253	0.732
30615	ENSMUSG00000062580.9	Timm17a	chr1	-	135304429	135304564	135304429	135304561	135306088	135306217	30615	3,2	1,0	1,1	5,8	102	99	5.79948e-06	0.000690858	0.744,1.0	0.163,0.108	0.736
32843	ENSMUSG00000028034.15	Fubp1	chr3	+	152233602	152233702	152233607	152233702	152231876	152232022	32843	3,3	1,1	0,0	3,1	104	99	1.04241e-06	0.000165691	0.741,0.741	0.0,0.0	0.741
56460	ENSMUSG00000007656.13	Arpp19	chr9	+	75042938	75043298	75043208	75043298	75037916	75037961	56460	10,2	0,0	5,4	6,7	198	99	1.81818e-08	4.5964e-06	1.0,1.0	0.294,0.222	0.742
9589	ENSMUSG00000039615.9	Stub1	chr17	-	25831520	25831976	25831520	25831954	25832045	25832941	9589	2,2	0,0	1,1	2,3	121	99	1.15115e-06	0.000179784	1.0,1.0	0.29,0.214	0.748
35976	ENSMUSG00000028896.13	Rcc1	chr4	-	132335716	132335944	132335716	132335855	132337730	132337910	35976	10,1	3,0	1,0	4,2	188	99	3.93065e-05	0.00332482	0.637,1.0	0.116,0.0	0.76
30899	ENSMUSG00000068798.10	Rap1a	chr3	-	105728642	105728996	105728642	105728957	105731955	105732071	30899	1,2	0,0	1,1	3,2	138	99	7.40104e-07	0.000122722	1.0,1.0	0.193,0.264	0.771
24773	ENSMUSG00000016503.17	Gtf3a	chr5	+	146955295	146955535	146955342	146955535	146955123	146955183	24773	2,1	0,0	1,2	3,4	146	99	3.05535e-07	5.6996e-05	1.0,1.0	0.184,0.253	0.781
12683	ENSMUSG00000021993.10	Mipep	chr14	+	60798147	60798316	60798229	60798316	60796171	60796235	12683	2,1	0,0	1,1	3,2	181	99	2.78109e-07	5.20607e-05	1.0,1.0	0.154,0.215	0.816
26900	ENSMUSG00000040481.17	Bptf	chr11	-	107086711	107086897	107086711	107086894	107095715	107095925	26900	20,5	0,1	1,0	4,2	102	99	3.31898e-09	1.10753e-06	1.0,0.829	0.195,0.0	0.817
37105	ENSMUSG00000026193.15	Fn1	chr1	-	71593070	71593510	71593070	71593231	71595663	71595802	37105	3,7	0,2	0,0	3,1	198	99	6.64031e-08	1.46811e-05	1.0,0.636	0.0,0.0	0.818
49135	ENSMUSG00000002043.17	Trappc6a	chr7	+	19509075	19509562	19509352	19509562	19508729	19508832	49135	6,6	0,0	8,0	7,1	198	99	1.05845e-07	2.23001e-05	1.0,1.0	0.364,0.0	0.818
16337	ENSMUSG00000020782.18	Llgl2	chr11	+	115855059	115855105	115855062	115855105	115854546	115854575	16337	5,4	0,2	0,0	3,2	102	99	1.14763e-09	4.4357e-07	1.0,0.66	0.0,0.0	0.83
10572	ENSMUSG00000003235.13	Eif2b5	chr16	+	20504524	20504790	20504640	20504790	20502529	20502842	10572	4,1	0,0	0,1	3,1	198	99	8.46797e-09	2.4071e-06	1.0,1.0	0.0,0.333	0.834
31198	ENSMUSG00000068264.11	Ap5s1	chr2	+	131212825	131213514	131213077	131213514	131212446	131212736	31198	3,4	0,1	0,0	2,5	198	99	4.32174e-09	1.3658e-06	1.0,0.667	0.0,0.0	0.834
48345	ENSMUSG00000040112.9	Mrps35	chr6	+	147061204	147061492	147061208	147061492	147060233	147060251	48345	2,3	0,0	0,1	2,2	103	99	1.65794e-07	3.36124e-05	1.0,1.0	0.0,0.325	0.838
25949	ENSMUSG00000033400.14	Agl	chr3	-	116781242	116781344	116781242	116781339	116782519	116782643	25949	13,11	0,0	2,0	4,1	104	99	3.49946e-07	6.37317e-05	1.0,1.0	0.322,0.0	0.839
35213	ENSMUSG00000027433.5	Xrn2	chr2	+	147024690	147024823	147024719	147024823	147024507	147024635	35213	6,2	2,0	0,0	1,2	128	99	1.68763e-08	4.31753e-06	0.699,1.0	0.0,0.0	0.849
12670	ENSMUSG00000022450.6	Ndufa6	chr15	-	82350719	82351126	82350719	82351106	82354080	82354322	12670	1,1	0,0	1,0	3,6	119	99	6.66656e-12	4.47701e-09	1.0,1.0	0.217,0.0	0.891
30578	ENSMUSG00000101438.2	Gm19412	chr17	-	33919573	33919957	33919573	33919764	33920069	33920485	30578	5,1	0,0	3,0	8,4	198	99	2.73799e-10	1.20808e-07	1.0,1.0	0.158,0.0	0.921
15905	ENSMUSG00000020594.14	Pum2	chr12	+	8728947	8729149	8728953	8729149	8728633	8728777	15905	2,1	0,0	0,0	1,2	105	99	5.49084e-09	1.64008e-06	1.0,1.0	0.0,0.0	1
16921	ENSMUSG00000078700.10	D030028A08Rik	chr11	+	96959335	96959451	96959339	96959451	96958852	96959024	16921	1,2	0,0	0,0	1,1	103	99	1.12972e-08	3.08093e-06	1.0,1.0	0.0,0.0	1
18837	ENSMUSG00000000384.15	Tbrg4	chr11	-	6618996	6619099	6618996	6619096	6619555	6619713	18837	2,2	0,0	0,0	5,1	102	99	3.36682e-10	1.43557e-07	1.0,1.0	0.0,0.0	1
19579	ENSMUSG00000034024.8	Cct2	chr10	-	117052903	117053149	117052903	117053145	117054039	117054139	19579	1,2	0,0	0,0	1,1	103	99	1.12972e-08	3.08093e-06	1.0,1.0	0.0,0.0	1
28998	ENSMUSG00000032501.9	Trib1	chr15	+	59653069	59653294	59653094	59653294	59651478	59651771	28998	1,1	0,0	0,0	3,1	124	99	4.3069e-09	1.3658e-06	1.0,1.0	0.0,0.0	1
31191	ENSMUSG00000034135.15	Sik3	chr9	+	46201718	46202070	46202003	46202070	46198551	46198707	31191	1,2	0,0	0,0	1,1	198	99	1.17288e-08	3.16649e-06	1.0,1.0	0.0,0.0	1
43477	ENSMUSG00000023191.9	P3h3	chr6	-	124854310	124854452	124854310	124854447	124854581	124854827	43477	2,1	0,0	0,0	2,1	104	99	5.49493e-09	1.64008e-06	1.0,1.0	0.0,0.0	1
47619	ENSMUSG00000084950.7	Gm5577	chr6	+	87983836	87984172	87983924	87984172	87982959	87983108	47619	1,2	0,0	0,0	4,2	187	99	1.28386e-09	4.82347e-07	1.0,1.0	0.0,0.0	1

## Sheet: A5SS
ID	GeneID	geneSymbol	chr	strand	longExonStart_0base	longExonEnd	shortES	shortEE	flankingES	flankingEE	ID.1	IJC_SAMPLE_1	SJC_SAMPLE_1	IJC_SAMPLE_2	SJC_SAMPLE_2	IncFormLen	SkipFormLen	PValue	FDR	IncLevel1	IncLevel2	IncLevelDifference
10398	ENSMUSG00000020629.12	Adi1	chr12	+	28675483	28675846	28675483	28675608	28677777	28677897	10398	0,0	1,3	1,1	0,0	198	99	7.86416e-09	1.31294e-06	0.0,0.0	1.0,1.0	-1
11219	ENSMUSG00000078700.10	D030028A08Rik	chr11	+	96958852	96959024	96958852	96958978	96959339	96959451	11219	0,0	7,3	1,1	0,0	145	99	2.69814e-09	5.09503e-07	0.0,0.0	1.0,1.0	-1
13155	ENSMUSG00000022994.9	Adcy6	chr15	-	98600143	98600289	98600171	98600289	98599899	98600027	13155	0,0	2,2	3,1	0,0	127	99	1.2889e-09	2.6817e-07	0.0,0.0	1.0,1.0	-1
20293	ENSMUSG00000051469.14	Zfp24	chr18	-	24017286	24017431	24017321	24017431	24013924	24014685	20293	0,0	1,2	1,1	0,0	134	99	9.04814e-09	1.48512e-06	0.0,0.0	1.0,1.0	-1
22740	ENSMUSG00000036752.4	Tubb4b	chr2	-	25224376	25224654	25224427	25224654	25224123	25224232	22740	0,0	3,4	1,1	0,0	150	99	3.23316e-09	5.98905e-07	0.0,0.0	1.0,1.0	-1
22874	ENSMUSG00000059995.12	Atxn7l3	chr11	-	102294074	102294163	102294084	102294163	102293843	102293941	22874	0,0	3,2	1,1	0,0	109	99	2.41053e-09	4.64205e-07	0.0,0.0	1.0,1.0	-1
27645	ENSMUSG00000026784.14	Pdss1	chr2	+	22915392	22915528	22915392	22915524	22935558	22935639	27645	0,0	5,1	3,1	0,0	103	99	3.3416e-10	7.97473e-08	0.0,0.0	1.0,1.0	-1
27694	ENSMUSG00000022708.16	Zbtb20	chr16	+	43193464	43193857	43193464	43193538	43232758	43232820	27694	0,0	2,1	2,1	0,0	198	99	3.9232e-09	7.09825e-07	0.0,0.0	1.0,1.0	-1
35252	ENSMUSG00000030435.16	U2af2	chr7	+	5062142	5062616	5062142	5062611	5066402	5067041	35252	0,0	4,1	2,1	0,0	104	99	1.31804e-09	2.72723e-07	0.0,0.0	1.0,1.0	-1
39308	ENSMUSG00000031838.8	Ifi30	chr8	-	70765943	70766304	70766201	70766304	70764919	70765102	39308	0,0	2,2	3,1	0,0	198	99	8.73558e-10	1.90907e-07	0.0,0.0	1.0,1.0	-1
41969	ENSMUSG00000025785.5	Exosc7	chr9	+	123113214	123113298	123113214	123113251	123118890	123118992	41969	0,0	1,2	2,5	0,0	146	99	6.22811e-10	1.40857e-07	0.0,0.0	1.0,1.0	-1
17783	ENSMUSG00000062006.12	Rpl34	chr3	-	130729862	130730321	130729951	130730321	130729228	130729302	17783	0,1	1,8	1,1	0,0	188	99	1.03311e-08	1.63591e-06	0.0,0.062	1.0,1.0	-0.969
21874	ENSMUSG00000020464.15	Pnpt1	chr11	+	29156836	29157090	29156836	29156943	29159324	29159403	21874	0,1	1,2	9,3	0,0	198	99	1.12171e-06	0.00011141	0.0,0.2	1.0,1.0	-0.9
30930	ENSMUSG00000025240.9	Sacm1l	chr9	+	123548314	123548535	123548314	123548329	123548861	123548989	30930	0,2	1,4	1,1	0,0	198	99	3.83979e-09	6.97981e-07	0.0,0.2	1.0,1.0	-0.9
14842	ENSMUSG00000026594.14	Ralgps2	chr1	-	156938973	156939387	156939351	156939387	156907638	156907778	14842	2,0	3,2	3,2	0,0	198	99	2.46607e-09	4.72562e-07	0.25,0.0	1.0,1.0	-0.875
32517	ENSMUSG00000029716.13	Tfr2	chr5	+	137569850	137569959	137569850	137569934	137570071	137570118	32517	0,0	1,5	3,1	1,0	124	99	7.31468e-07	7.75316e-05	0.0,0.0	0.705,1.0	-0.853
5415	ENSMUSG00000024287.8	Thoc1	chr18	+	9959254	9959677	9959254	9959319	9960485	9961171	5415	0,2	1,2	5,9	0,0	198	99	6.13031e-05	0.00338187	0.0,0.333	1.0,1.0	-0.834
9421	ENSMUSG00000047879.17	Usp14	chr18	-	10029638	10030081	10029912	10030081	10017990	10018095	9421	0,0	1,4	1,4	0,1	198	99	3.62106e-07	4.19224e-05	0.0,0.0	1.0,0.667	-0.834
18339	ENSMUSG00000029920.9	Smarcad1	chr6	+	65042582	65042980	65042582	65042914	65043205	65043561	18339	0,1	1,1	2,1	0,0	165	99	0.000480158	0.0177887	0.0,0.375	1.0,1.0	-0.812
10393	ENSMUSG00000020629.12	Adi1	chr12	+	28675230	28675661	28675230	28675608	28677777	28677897	10393	0,3	1,3	4,3	0,0	152	99	2.21722e-05	0.00143503	0.0,0.394	1.0,1.0	-0.803
5582	ENSMUSG00000061950.17	Ppp4r1	chr17	+	65814305	65814644	65814305	65814418	65815922	65816050	5582	1,0	4,1	5,1	1,0	198	99	1.42058e-06	0.000136784	0.111,0.0	0.714,1.0	-0.801
7929	ENSMUSG00000041841.8	Rpl37	chr15	+	5116644	5117055	5116644	5116879	5117286	5117422	7929	0,0	1,1	3,2	1,0	198	99	2.73769e-07	3.2768e-05	0.0,0.0	0.6,1.0	-0.8
11999	ENSMUSG00000094845.2	Tmem95	chr11	-	69877135	69877201	69877180	69877201	69876960	69877041	11999	0,1	3,1	3,5	0,0	144	99	5.50183e-08	7.61641e-06	0.0,0.407	1.0,1.0	-0.796
38709	ENSMUSG00000096401.2	Gm21811	chr8	+	20147548	20147921	20147548	20147716	20151480	20151665	38709	1,4	4,13	10,1	1,0	198	99	2.91358e-07	3.42412e-05	0.111,0.133	0.833,1.0	-0.794
12038	ENSMUSG00000020898.18	Ctc1	chr11	+	69015910	69016189	69015910	69016077	69021029	69022614	12038	3,0	2,1	2,6	0,0	198	99	0.00049957	0.0183506	0.429,0.0	1.0,1.0	-0.785
18808	ENSMUSG00000074457.10	S100a16	chr3	+	90540976	90541317	90540976	90541190	90541993	90542172	18808	1,0	2,1	16,25	1,2	198	99	1.50884e-05	0.00102611	0.2,0.0	0.889,0.862	-0.775
26571	ENSMUSG00000033021.16	Gmppa	chr1	+	75435929	75436319	75435929	75436239	75436777	75436838	26571	3,0	2,1	1,2	0,0	179	99	0.00079178	0.0259541	0.453,0.0	1.0,1.0	-0.773
4195	ENSMUSG00000031189.12	Aff2	chrX	+	69725412	69725464	69725412	69725446	69767181	69767278	4195	0,1	2,1	1,2	0,0	117	99	1.2027e-05	0.000835448	0.0,0.458	1.0,1.0	-0.771
20832	ENSMUSG00000025956.10	Mettl21a	chr1	-	64613995	64614268	64614053	64614268	64607955	64608137	20832	0,3	1,2	6,2	0,0	157	99	0.00142751	0.039921	0.0,0.486	1.0,1.0	-0.757
16053	ENSMUSG00000002083.13	Bbc3	chr7	+	16308392	16308861	16308392	16308508	16312125	16312414	16053	2,4	5,4	1,1	0,0	198	99	5.81548e-09	1.00992e-06	0.167,0.333	1.0,1.0	-0.75
22228	ENSMUSG00000036555.14	Iqce	chr5	-	140701793	140701969	140701941	140701969	140699684	140699732	22228	0,0	5,1	2,1	1,0	198	99	0.000430575	0.0162615	0.0,0.0	0.5,1.0	-0.75
30515	ENSMUSG00000037514.17	Pank2	chr2	+	131285167	131285400	131285167	131285269	131287473	131287597	30515	2,0	1,4	1,4	0,0	198	99	1.38381e-08	2.13612e-06	0.5,0.0	1.0,1.0	-0.75
17402	ENSMUSG00000025437.15	Usp33	chr3	+	152356348	152356531	152356348	152356464	152357839	152357971	17402	1,5	4,5	3,1	0,0	166	99	1.02536e-08	1.63591e-06	0.13,0.374	1.0,1.0	-0.748
15186	ENSMUSG00000029003.11	Mad2l2	chr4	+	148144263	148144718	148144263	148144358	148145103	148145196	15186	0,6	3,7	28,15	0,2	198	99	3.87258e-07	4.43068e-05	0.0,0.3	1.0,0.789	-0.745
36316	ENSMUSG00000046364.14	Rpl27a	chr7	+	109519146	109519304	109519146	109519226	109519584	109521153	36316	0,6	2,3	3,5	0,0	177	99	2.06246e-06	0.000186148	0.0,0.528	1.0,1.0	-0.736
6278	ENSMUSG00000014769.10	Psmb1	chr17	-	15499232	15499751	15499661	15499751	15494415	15494523	6278	2,1	2,2	4,4	0,0	198	99	3.72162e-06	0.00030934	0.333,0.2	1.0,1.0	-0.734
40833	ENSMUSG00000029310.13	Nudt9	chr5	+	104047153	104047603	104047153	104047383	104050577	104050817	40833	2,0	4,3	1,4	0,1	198	99	4.92592e-05	0.00282614	0.2,0.0	1.0,0.667	-0.734
15664	ENSMUSG00000053841.15	Txlna	chr4	-	129640847	129640978	129640955	129640978	129640255	129640427	15664	0,0	5,3	4,4	0,3	198	99	3.66316e-06	0.000306633	0.0,0.0	1.0,0.4	-0.7
15947	ENSMUSG00000001323.17	Srr	chr11	-	74925275	74925682	74925583	74925682	74919436	74919662	15947	1,0	2,1	3,1	1,0	198	99	3.92417e-05	0.00234126	0.2,0.0	0.6,1.0	-0.7
24439	ENSMUSG00000038685.18	Rtel1	chr2	+	181319962	181320429	181319962	181320043	181320805	181321057	24439	3,0	1,3	5,1	0,0	198	99	5.19588e-06	0.000407652	0.6,0.0	1.0,1.0	-0.7
14334	ENSMUSG00000024924.14	Vldlr	chr19	+	27239621	27239966	27239621	27239741	27240465	27240637	14334	4,6	16,29	8,8	1,1	198	99	9.86161e-09	1.59177e-06	0.111,0.094	0.8,0.8	-0.698
26800	ENSMUSG00000021327.19	Zkscan3	chr13	-	21394385	21394763	21394758	21394763	21393961	21394085	26800	3,4	5,6	7,13	0,1	198	99	1.91355e-07	2.36639e-05	0.231,0.25	1.0,0.867	-0.693
38060	ENSMUSG00000028032.13	Papss1	chr3	+	131565591	131565780	131565591	131565643	131565947	131566060	38060	3,2	2,4	3,2	0,0	198	99	4.17716e-08	5.82407e-06	0.429,0.2	1.0,1.0	-0.685
4238	ENSMUSG00000054737.11	Zfp182	chrX	-	21061567	21061986	21061925	21061986	21060502	21060557	4238	3,0	8,4	11,2	5,0	198	99	0.00189129	0.0492444	0.158,0.0	0.524,1.0	-0.683
10544	ENSMUSG00000020594.14	Pum2	chr12	+	8678169	8678524	8678169	8678233	8698090	8698159	10544	1,0	2,1	8,5	0,2	198	99	2.9956e-05	0.00187346	0.2,0.0	1.0,0.556	-0.678
41106	ENSMUSG00000022404.8	Slc25a17	chr15	-	81360651	81360727	81360700	81360727	81344100	81344161	41106	1,1	2,2	8,4	1,0	148	99	2.66775e-05	0.00169015	0.251,0.251	0.843,1.0	-0.67
38471	ENSMUSG00000058454.15	Dhcr7	chr7	+	143829625	143829902	143829625	143829739	143830138	143830265	38471	2,1	2,1	1,1	0,0	198	99	8.97693e-05	0.00466848	0.333,0.333	1.0,1.0	-0.667
5777	ENSMUSG00000019432.15	Ddx39b	chr17	+	35243729	35243911	35243729	35243792	35244135	35244263	5777	0,0	2,3	1,2	1,0	198	99	0.000555871	0.019838	0.0,0.0	0.333,1.0	-0.666
6590	ENSMUSG00000002846.9	Timmdc1	chr16	-	38522404	38522641	38522638	38522641	38518366	38518532	6590	0,0	1,5	2,3	2,0	198	99	9.27703e-05	0.00479252	0.0,0.0	0.333,1.0	-0.666
25114	ENSMUSG00000038079.14	Tmem237	chr1	-	59119911	59120382	59120317	59120382	59117974	59118006	25114	0,0	4,8	2,3	2,0	198	99	9.21944e-05	0.0047691	0.0,0.0	0.333,1.0	-0.666
30379	ENSMUSG00000068580.11	Zfyve19	chr2	+	119209011	119209140	119209011	119209087	119210481	119210603	30379	0,2	1,2	4,1	1,0	152	99	0.000248217	0.0105669	0.0,0.394	0.723,1.0	-0.664
31409	ENSMUSG00000039069.19	Mtg2	chr2	+	180070587	180071084	180070587	180070847	180071793	180071886	31409	2,1	3,4	8,4	2,0	198	99	0.000253154	0.0107157	0.25,0.111	0.667,1.0	-0.653
4478	ENSMUSG00000049164.7	Zfp518a	chr19	+	40894704	40894821	40894704	40894786	40897083	40897165	4478	2,1	4,1	2,4	0,0	134	99	6.6878e-07	7.22654e-05	0.27,0.425	1.0,1.0	-0.652
31854	ENSMUSG00000032187.16	Smarca4	chr9	+	21672042	21672470	21672042	21672114	21673169	21673336	31854	0,1	3,2	2,1	1,0	198	99	0.00045019	0.0168713	0.0,0.2	0.5,1.0	-0.65
34993	ENSMUSG00000003378.9	Grik5	chr7	-	25062877	25063056	25062882	25063056	25060729	25060783	34993	0,1	3,4	6,1	0,1	104	99	6.81153e-07	7.33498e-05	0.0,0.192	1.0,0.488	-0.648
17235	ENSMUSG00000034254.17	Agpat1	chr17	+	34610536	34610926	34610536	34610644	34611790	34611866	17235	5,2	3,3	21,14	0,0	198	99	1.0318e-07	1.35141e-05	0.455,0.25	1.0,1.0	-0.647
266	ENSMUSG00000067942.6	Zfp160	chr17	+	21011675	21011777	21011675	21011772	21018828	21018889	266	0,1	7,1	6,7	0,2	104	99	1.73767e-06	0.000161051	0.0,0.488	1.0,0.769	-0.641
32843	ENSMUSG00000025574.13	Tk1	chr11	-	117825794	117825847	117825839	117825847	117825600	117825632	32843	2,0	2,2	3,4	1,0	144	99	5.53767e-05	0.00311294	0.407,0.0	0.673,1.0	-0.633
22389	ENSMUSG00000028906.16	Epb41	chr4	-	131955527	131955578	131955542	131955578	131937014	131937464	22389	5,3	5,7	1,1	0,0	114	99	1.05303e-06	0.000105847	0.465,0.271	1.0,1.0	-0.632
5918	ENSMUSG00000024018.18	Ccdc167	chr17	-	29706661	29706749	29706678	29706749	29705488	29705583	5918	0,1	1,2	4,3	0,2	116	99	0.000153069	0.00719997	0.0,0.299	1.0,0.561	-0.631
8816	ENSMUSG00000024045.6	Akap8	chr17	-	32320470	32320658	32320616	32320658	32318770	32318809	8816	1,7	2,3	2,2	0,0	198	99	3.55313e-06	0.000301885	0.2,0.538	1.0,1.0	-0.631
30649	ENSMUSG00000001768.16	Rin2	chr2	+	145677083	145677179	145677083	145677175	145701196	145701322	30649	2,0	2,1	3,3	0,1	103	99	0.00152563	0.0421199	0.49,0.0	1.0,0.742	-0.626
33880	ENSMUSG00000053470.13	Kdm3a	chr6	-	71632755	71632905	71632862	71632905	71632496	71632579	33880	2,4	3,2	1,1	0,0	198	99	9.69795e-07	9.8769e-05	0.25,0.5	1.0,1.0	-0.625
8461	ENSMUSG00000049295.17	Zfp219	chr14	-	52014430	52014912	52014850	52014912	52009969	52010058	8461	4,2	7,4	3,4	0,1	198	99	0.000114512	0.00568905	0.222,0.2	1.0,0.667	-0.623
12985	ENSMUSG00000090841.2	Myl6	chr10	-	128493705	128493847	128493835	128493847	128493538	128493566	12985	3,2	2,2	6,4	0,0	198	99	3.01936e-05	0.00188528	0.429,0.333	1.0,1.0	-0.619
17326	ENSMUSG00000020652.17	Cenpo	chr12	-	4231445	4231682	4231515	4231682	4216518	4216778	17326	2,1	1,2	4,4	0,0	169	99	0.00141507	0.0396874	0.54,0.227	1.0,1.0	-0.617
2063	ENSMUSG00000024483.19	Ankhd1	chr18	+	36641398	36641505	36641398	36641478	36641576	36641693	2063	0,1	2,3	2,1	0,1	126	99	7.04197e-05	0.00383122	0.0,0.208	1.0,0.44	-0.616
39701	ENSMUSG00000036712.15	Cyld	chr8	+	88697027	88697525	88697027	88697401	88705225	88705879	39701	7,4	6,3	5,5	0,0	198	99	5.90285e-07	6.5606e-05	0.368,0.4	1.0,1.0	-0.616
38043	ENSMUSG00000036893.17	Ehmt1	chr2	-	24919190	24919574	24919304	24919574	24887002	24887069	38043	3,6	4,3	1,2	0,0	198	99	1.23301e-07	1.57777e-05	0.273,0.5	1.0,1.0	-0.613
6596	ENSMUSG00000002846.9	Timmdc1	chr16	-	38522599	38522641	38522638	38522641	38518366	38518532	6596	1,1	1,5	9,2	2,0	138	99	0.000113554	0.00566314	0.418,0.125	0.763,1.0	-0.61
27756	ENSMUSG00000037822.12	Smim14	chr5	-	65491836	65492311	65492267	65492311	65468392	65468501	27756	0,5	1,4	3,3	1,0	198	99	0.000886165	0.0282788	0.0,0.385	0.6,1.0	-0.608
37017	ENSMUSG00000108427.1	Gm36696	chr7	+	72110760	72111142	72110760	72111115	72113373	72113456	37017	0,0	2,1	12,8	5,5	126	99	6.68963e-06	0.000506278	0.0,0.0	0.653,0.557	-0.605
39977	ENSMUSG00000022051.15	Bnip3l	chr14	-	66993616	66993949	66993872	66993949	66989433	66989509	39977	1,4	3,6	3,1	1,0	198	99	0.00159935	0.0434522	0.143,0.25	0.6,1.0	-0.604
5917	ENSMUSG00000024018.18	Ccdc167	chr17	-	29706465	29706749	29706678	29706749	29705488	29705583	5917	0,0	1,2	4,1	0,2	198	99	0.000938443	0.0295234	0.0,0.0	1.0,0.2	-0.6
31294	ENSMUSG00000031628.9	Casp3	chr8	+	46632316	46632738	46632316	46632454	46634197	46635082	31294	0,0	2,1	4,1	0,2	198	99	0.000938443	0.0295234	0.0,0.0	1.0,0.2	-0.6
9440	ENSMUSG00000021408.15	Ripk1	chr13	+	34002873	34003158	34002873	34002953	34009600	34009820	9440	7,4	2,10	2,1	0,0	198	99	4.8832e-07	5.51249e-05	0.636,0.167	1.0,1.0	-0.599
5357	ENSMUSG00000034445.8	Cyb561a3	chr19	+	10577171	10577565	10577171	10577483	10577733	10578083	5357	4,3	2,4	4,1	0,0	181	99	3.84736e-07	4.41482e-05	0.522,0.291	1.0,1.0	-0.594
13547	ENSMUSG00000054708.17	Ankrd24	chr10	+	81639306	81639712	81639306	81639344	81639855	81639936	13547	0,2	2,5	7,9	3,1	198	99	0.000159155	0.00739104	0.0,0.167	0.538,0.818	-0.594
36433	ENSMUSG00000038695.13	Josd2	chr7	+	44468181	44468482	44468181	44468417	44468809	44468970	36433	0,2	4,3	5,3	0,2	164	99	0.000456298	0.0170509	0.0,0.287	1.0,0.475	-0.594
9563	ENSMUSG00000039738.16	Slx4	chr16	-	4003526	4003752	4003751	4003752	4001200	4001678	9563	5,9	4,6	4,6	0,0	198	99	9.11118e-07	9.40119e-05	0.385,0.429	1.0,1.0	-0.593
8550	ENSMUSG00000037544.14	Dlgap5	chr14	-	47407582	47407911	47407651	47407911	47406338	47406418	8550	3,2	1,5	1,3	0,0	168	99	1.11232e-06	0.000110993	0.639,0.191	1.0,1.0	-0.585
30817	ENSMUSG00000027487.11	Cdk5rap1	chr2	-	154372375	154372691	154372581	154372691	154370673	154370955	30817	0,0	5,1	2,4	1,1	198	99	3.20289e-06	0.000276258	0.0,0.0	0.5,0.667	-0.584
41126	ENSMUSG00000032249.14	Anp32a	chr9	+	62344798	62344993	62344798	62344871	62371719	62371869	41126	4,6	4,3	5,5	0,0	198	99	1.93384e-07	2.38058e-05	0.333,0.5	1.0,1.0	-0.584
6920	ENSMUSG00000022677.15	Fopnl	chr16	-	14316834	14317078	14316932	14317078	14313815	14314013	6920	0,0	6,3	6,5	4,1	197	99	6.16795e-07	6.79489e-05	0.0,0.0	0.43,0.715	-0.573
17236	ENSMUSG00000034254.17	Agpat1	chr17	+	34610536	34611005	34610536	34610644	34611790	34611866	17236	5,4	3,3	20,14	0,0	198	99	8.98917e-07	9.29997e-05	0.455,0.4	1.0,1.0	-0.573
41084	ENSMUSG00000032294.17	Pkm	chr9	+	59665862	59666015	59665862	59666013	59668548	59668680	41084	1,1	4,5	5,8	3,1	101	99	0.000326381	0.0129951	0.197,0.164	0.62,0.887	-0.573
5782	ENSMUSG00000024403.16	Atp6v1g2	chr17	+	35235494	35235979	35235494	35235558	35237116	35237217	5782	0,0	3,3	5,3	1,2	198	99	1.42834e-06	0.000137191	0.0,0.0	0.714,0.429	-0.572
31326	ENSMUSG00000037570.16	Mcrs1	chr15	-	99251656	99251955	99251721	99251955	99249875	99250014	31326	0,2	3,4	7,1	0,1	164	99	3.89151e-05	0.00232892	0.0,0.232	1.0,0.376	-0.572
7111	ENSMUSG00000023021.15	Cers5	chr15	-	99772738	99772885	99772839	99772885	99751235	99751341	7111	1,0	2,2	1,3	1,0	198	99	8.68106e-05	0.00453889	0.2,0.0	0.333,1.0	-0.567
24471	ENSMUSG00000026436.15	Elk4	chr1	+	132008296	132008923	132008296	132008612	132014382	132014598	24471	0,1	1,2	2,1	0,1	198	99	0.000560883	0.0199709	0.0,0.2	1.0,0.333	-0.567
29582	ENSMUSG00000040952.16	Rps19	chr7	+	24887168	24887636	24887168	24887202	24888281	24888465	29582	4,2	1,4	1,2	0,0	198	99	3.79467e-06	0.000313403	0.667,0.2	1.0,1.0	-0.567
19861	ENSMUSG00000040265.16	Dnm3	chr1	-	162273603	162273649	162273619	162273649	162231653	162231767	19861	9,0	3,2	6,2	1,0	115	99	0.00119786	0.0352472	0.721,0.0	0.838,1.0	-0.558
36345	ENSMUSG00000051444.9	Bbs12	chr3	+	37312555	37312941	37312555	37312585	37319135	37321453	36345	1,0	3,9	3,7	0,10	198	99	0.000461315	0.0172219	0.143,0.0	1.0,0.259	-0.558
7221	ENSMUSG00000022462.7	Slc38a2	chr15	-	96697911	96698263	96698181	96698263	96695435	96695509	7221	33,24	57,55	85,63	15,9	198	99	0	0	0.224,0.179	0.739,0.778	-0.557
8822	ENSMUSG00000024045.6	Akap8	chr17	-	32320616	32321104	32320906	32321104	32318770	32318809	8822	5,9	3,7	42,12	1,0	198	99	3.59783e-08	5.08929e-06	0.455,0.391	0.955,1.0	-0.554
32918	ENSMUSG00000041313.14	Slc7a1	chr5	-	148399672	148399791	148399786	148399791	148365161	148365251	32918	5,12	6,4	4,5	0,0	198	99	6.18352e-07	6.79489e-05	0.294,0.6	1.0,1.0	-0.553
26389	ENSMUSG00000028648.13	Ndufs5	chr4	-	123718022	123718186	123718035	123718186	123715863	123716081	26389	0,1	3,1	3,3	2,0	112	99	0.000142202	0.00673773	0.0,0.469	0.57,1.0	-0.55
28475	ENSMUSG00000074604.9	Mgst2	chr3	+	51676935	51677123	51676935	51677060	51677564	51677635	28475	4,0	1,2	6,7	0,1	162	99	0.00125879	0.0365426	0.71,0.0	1.0,0.811	-0.55
20739	ENSMUSG00000028953.10	Abcf2	chr5	-	24577259	24577467	24577299	24577467	24576518	24576727	20739	0,2	3,3	1,4	1,0	139	99	0.000122485	0.00597826	0.0,0.322	0.416,1.0	-0.547
12650	ENSMUSG00000031157.10	Pqbp1	chrX	-	7898876	7899000	7898965	7899000	7898550	7898636	12650	5,2	2,2	8,2	0,0	188	99	0.000141092	0.00669326	0.568,0.345	1.0,1.0	-0.544
26271	ENSMUSG00000034826.14	Nup54	chr5	-	92434347	92434546	92434511	92434546	92431038	92431122	26271	17,8	11,13	27,16	2,1	198	99	1.26031e-06	0.000123492	0.436,0.235	0.871,0.889	-0.544
28341	ENSMUSG00000023971.9	Rrp36	chr17	-	46674177	46674255	46674196	46674255	46672524	46672591	28341	1,2	2,2	6,3	1,0	118	99	0.000470525	0.0175488	0.296,0.456	0.834,1.0	-0.541
12713	ENSMUSG00000020473.13	Aebp1	chr11	+	5862744	5862782	5862744	5862765	5863938	5864277	12713	3,1	3,1	4,1	0,0	116	99	0.000124892	0.00608048	0.46,0.46	1.0,1.0	-0.54
16852	ENSMUSG00000044813.15	Shb	chr4	-	45489384	45489794	45489670	45489794	45489054	45489175	16852	3,8	7,4	9,6	0,1	198	99	3.74146e-05	0.00226702	0.176,0.5	1.0,0.75	-0.537
36223	ENSMUSG00000066571.13	4931406P16Rik	chr7	-	34257441	34257727	34257631	34257727	34256411	34256570	36223	4,6	4,4	20,10	0,1	198	99	3.26641e-06	0.000280756	0.333,0.429	1.0,0.833	-0.535
33806	ENSMUSG00000006215.12	Zbtb17	chr4	+	141448042	141448226	141448042	141448136	141461768	141461975	33806	5,2	1,4	3,4	0,0	189	99	1.16449e-05	0.000813263	0.724,0.208	1.0,1.0	-0.534
7946	ENSMUSG00000085615.2	A330035P11Rik	chr14	-	122106278	122106953	122106772	122106953	122105783	122106170	7946	4,3	4,1	3,1	0,0	198	99	2.82932e-06	0.000246221	0.333,0.6	1.0,1.0	-0.533
22029	ENSMUSG00000002778.14	Kdelr1	chr7	+	45873126	45873433	45873126	45873235	45873758	45873859	22029	1,0	1,2	7,4	0,3	198	99	0.000306934	0.0123472	0.333,0.0	1.0,0.4	-0.533
14301	ENSMUSG00000001552.14	Jup	chr11	-	100397551	100397763	100397635	100397763	100386172	100386385	14301	5,4	41,30	5,14	3,3	183	99	6.47216e-08	8.74191e-06	0.062,0.067	0.474,0.716	-0.53
38778	ENSMUSG00000031708.16	Tecr	chr8	-	83572575	83573045	83573027	83573045	83572397	83572455	38778	24,23	23,25	68,64	5,6	198	99	1.15463e-13	6.41645e-11	0.343,0.315	0.872,0.842	-0.528
38775	ENSMUSG00000031708.16	Tecr	chr8	-	83572551	83573045	83573027	83573045	83572397	83572455	38775	24,23	23,25	68,62	5,6	198	99	1.7053e-13	9.34314e-11	0.343,0.315	0.872,0.838	-0.526
10630	ENSMUSG00000018012.11	Rac3	chr11	+	120721469	120721945	120721469	120721799	120722230	120722302	10630	2,5	1,3	1,3	0,0	198	99	0.000108752	0.00545863	0.5,0.455	1.0,1.0	-0.522
36556	ENSMUSG00000030796.17	Tead2	chr7	+	45215752	45216038	45215752	45215870	45217212	45217450	36556	0,2	7,7	5,5	3,1	198	99	7.44354e-05	0.00400489	0.0,0.125	0.455,0.714	-0.522
27516	ENSMUSG00000021466.12	Ptch1	chr13	-	63564143	63564535	63564457	63564535	63563622	63563815	27516	9,14	10,15	70,34	8,3	198	99	7.15559e-09	1.21551e-06	0.31,0.318	0.814,0.85	-0.518
9366	ENSMUSG00000057531.14	Dtnbp1	chr13	-	44999519	44999714	44999603	44999714	44993684	44993738	9366	6,2	2,2	2,3	0,0	183	99	0.000255938	0.0107983	0.619,0.351	1.0,1.0	-0.515
38215	ENSMUSG00000040167.16	Ikzf5	chr7	-	131410197	131410405	131410386	131410405	131408930	131409078	38215	9,3	6,7	22,18	4,1	198	99	0.000278203	0.0114884	0.429,0.176	0.733,0.9	-0.514
15347	ENSMUSG00000028917.14	Plekhm2	chr4	-	141631267	141631574	141631509	141631574	141630571	141630660	15347	5,5	7,1	6,3	0,0	198	99	1.66181e-06	0.00015577	0.263,0.714	1.0,1.0	-0.512
26183	ENSMUSG00000039096.10	Rsad1	chr11	-	94548217	94548602	94548470	94548602	94544634	94544785	26183	3,3	6,2	13,16	2,1	198	99	0.000241182	0.0103783	0.2,0.429	0.765,0.889	-0.512
20793	ENSMUSG00000023348.11	Trip6	chr5	-	137310600	137310831	137310732	137310831	137310284	137310405	20793	4,11	2,6	3,7	0,0	198	99	4.04203e-06	0.000333125	0.5,0.478	1.0,1.0	-0.511
22030	ENSMUSG00000002778.14	Kdelr1	chr7	+	45873126	45873433	45873126	45873261	45873758	45873859	22030	1,0	2,3	7,4	0,7	198	99	0.000552379	0.0197678	0.2,0.0	1.0,0.222	-0.511
2913	ENSMUSG00000034071.15	Zfp551	chr7	-	12421762	12421846	12421807	12421846	12418542	12418666	2913	1,2	17,15	3,5	2,2	144	99	4.43113e-05	0.00258815	0.039,0.084	0.508,0.632	-0.509
12646	ENSMUSG00000031157.10	Pqbp1	chrX	-	7898774	7899000	7898965	7899000	7898550	7898636	12646	5,3	2,2	6,9	0,0	198	99	0.000156553	0.00731083	0.556,0.429	1.0,1.0	-0.507
3773	ENSMUSG00000024530.8	Prelid3a	chr18	+	67476963	67477120	67476963	67477066	67479071	67479352	3773	2,0	4,2	11,14	7,3	153	99	0.00136371	0.0386369	0.244,0.0	0.504,0.751	-0.505
35343	ENSMUSG00000023883.13	Phf10	chr17	-	14946240	14946721	14946654	14946721	14945013	14945184	35343	9,4	13,11	22,22	5,4	198	99	1.73885e-06	0.000161051	0.257,0.154	0.688,0.733	-0.505
28705	ENSMUSG00000042138.8	Msantd2	chr9	+	37513613	37513772	37513613	37513703	37517216	37517472	28705	4,1	4,3	2,2	1,0	168	99	0.00161798	0.0437991	0.371,0.164	0.541,1.0	-0.503
40725	ENSMUSG00000056153.15	Socs6	chr18	-	88886991	88887305	88887208	88887305	88851381	88854501	40725	2,8	2,3	20,4	1,0	198	99	0.000181149	0.00821294	0.333,0.571	0.909,1.0	-0.503
38799	ENSMUSG00000031708.16	Tecr	chr8	-	83607769	83607971	83607890	83607971	83574477	83574528	38799	3,1	1,4	2,5	0,1	198	99	0.000558986	0.0199308	0.6,0.111	1.0,0.714	-0.502
39963	ENSMUSG00000031728.10	Zfp821	chr8	+	109705545	109705984	109705545	109705564	109706356	109706419	39963	3,7	5,6	9,3	0,1	198	99	0.000108197	0.00543782	0.231,0.368	1.0,0.6	-0.501
39964	ENSMUSG00000031728.10	Zfp821	chr8	+	109705545	109706020	109705545	109705564	109706356	109706419	39964	3,7	5,6	9,3	0,1	198	99	0.000108197	0.00543782	0.231,0.368	1.0,0.6	-0.501
7859	ENSMUSG00000022201.16	Zfr	chr15	+	12117830	12118070	12117830	12117873	12118238	12118341	7859	4,4	1,4	7,2	0,0	198	99	6.4304e-06	0.00048856	0.667,0.333	1.0,1.0	-0.5
12714	ENSMUSG00000020473.13	Aebp1	chr11	+	5862744	5862972	5862744	5862765	5863938	5864277	12714	4,3	3,1	9,2	0,0	198	99	0.000127746	0.00619615	0.4,0.6	1.0,1.0	-0.5
15348	ENSMUSG00000028917.14	Plekhm2	chr4	-	141631289	141631574	141631509	141631574	141630571	141630660	15348	4,7	7,1	4,3	0,0	198	99	7.25037e-06	0.000541342	0.222,0.778	1.0,1.0	-0.5
16434	ENSMUSG00000091586.2	Cyp4f17	chr17	+	32528046	32528363	32528046	32528111	32528716	32530143	16434	4,3	1,3	4,2	0,0	198	99	0.000162692	0.00753418	0.667,0.333	1.0,1.0	-0.5
22641	ENSMUSG00000021546.18	Hnrnpk	chr13	-	58401790	58401914	58401797	58401914	58400341	58400417	22641	0,0	2,2	4,0	0,1	106	99	0.00106004	0.0322909	0.0,0.0	1.0,0.0	-0.5
24272	ENSMUSG00000015804.14	Med28	chr5	+	45520302	45520798	45520302	45520643	45522435	45522502	24272	1,0	0,2	2,1	0,0	198	99	0.00119564	0.0352084	1.0,0.0	1.0,1.0	-0.5
24280	ENSMUSG00000024160.16	Spsb3	chr17	+	24887164	24887445	24887164	24887245	24887779	24887917	24280	4,0	4,2	1,6	1,0	198	99	0.00106618	0.0324018	0.333,0.0	0.333,1.0	-0.5
30816	ENSMUSG00000027487.11	Cdk5rap1	chr2	-	154372318	154372691	154372581	154372691	154370673	154370955	30816	0,0	5,1	1,4	1,1	198	99	8.4958e-05	0.00447208	0.0,0.0	0.333,0.667	-0.5
32427	ENSMUSG00000026207.16	Speg	chr1	+	75430438	75430741	75430438	75430514	75431258	75432320	32427	0,1	2,0	1,4	0,0	198	99	0.00119564	0.0352084	0.0,1.0	1.0,1.0	-0.5
32823	ENSMUSG00000038722.17	Bud31	chr5	+	145146381	145146633	145146381	145146606	145147834	145148078	32823	0,0	2,3	4,0	0,1	126	99	0.00177926	0.0469492	0.0,0.0	1.0,0.0	-0.5
33941	ENSMUSG00000038880.13	Mrps34	chr17	+	24895115	24895320	24895115	24895182	24895661	24895704	33941	0,1	2,0	2,1	0,0	198	99	0.00119564	0.0352084	0.0,1.0	1.0,1.0	-0.5
5665	ENSMUSG00000023980.7	Taf8	chr17	-	47501782	47502272	47501867	47502272	47501283	47501440	5665	7,3	2,3	2,4	0,0	184	99	1.22787e-05	0.000851411	0.653,0.35	1.0,1.0	-0.498
40843	ENSMUSG00000048537.16	Phldb1	chr9	-	44708282	44708519	44708393	44708519	44707884	44708040	40843	6,1	18,15	10,5	2,3	198	99	4.93303e-05	0.00282614	0.143,0.032	0.714,0.455	-0.497
37703	ENSMUSG00000036606.17	Plxnb2	chr15	-	89166387	89166766	89166583	89166766	89165905	89166006	37703	7,3	1,5	12,5	0,0	198	99	1.02085e-05	0.00073133	0.778,0.231	1.0,1.0	-0.495
33343	ENSMUSG00000027678.17	Ncoa3	chr2	+	166049139	166049317	166049139	166049236	166050065	166050240	33343	3,3	4,3	16,10	1,2	180	99	0.000661041	0.0226161	0.292,0.355	0.898,0.733	-0.492
27169	ENSMUSG00000020458.16	Rtn4	chr11	+	29693773	29693983	29693773	29693962	29733632	29733840	27169	0,0	5,3	1,4	3,1	120	99	0.000171604	0.00788121	0.0,0.0	0.216,0.767	-0.491
27226	ENSMUSG00000025232.8	Hexa	chr9	+	59561942	59562347	59561942	59562026	59562866	59563050	27226	0,5	4,5	22,8	6,2	198	99	0.00164333	0.0441779	0.0,0.333	0.647,0.667	-0.491
16359	ENSMUSG00000025646.9	Atrip	chr9	-	109073658	109074120	109073853	109074120	109072606	109072737	16359	5,7	4,2	1,8	0,0	198	99	2.52057e-06	0.000222336	0.385,0.636	1.0,1.0	-0.49
4759	ENSMUSG00000024944.6	Arl2	chr19	-	6137618	6137840	6137729	6137840	6135978	6136059	4759	0,1	3,1	9,10	5,1	198	99	0.000155968	0.00730103	0.0,0.333	0.474,0.833	-0.487
9564	ENSMUSG00000039738.16	Slx4	chr16	-	4003557	4003752	4003751	4003752	4001200	4001678	9564	12,9	4,6	3,7	0,0	198	99	1.28515e-06	0.000124981	0.6,0.429	1.0,1.0	-0.486
31158	ENSMUSG00000039671.18	Zmynd8	chr2	-	165883062	165883398	165883327	165883398	165875704	165875775	31158	2,7	3,1	2,3	0,0	198	99	0.000399441	0.0152635	0.25,0.778	1.0,1.0	-0.486
6265	ENSMUSG00000023882.15	Zfp54	chr17	+	21430194	21430317	21430194	21430311	21433402	21435640	6265	0,0	1,1	2,1	2,1	105	99	0.00109043	0.0329695	0.0,0.0	0.485,0.485	-0.485
26749	ENSMUSG00000040018.9	Cox15	chr19	-	43752567	43752715	43752651	43752715	43751343	43751534	26749	0,0	5,3	3,1	1,1	183	99	0.000965443	0.0300686	0.0,0.0	0.619,0.351	-0.485
42385	ENSMUSG00000032480.17	Dhx30	chr9	-	110116838	110117108	110116859	110117108	110116677	110116755	42385	5,2	3,2	3,2	0,0	120	99	3.6716e-05	0.00223164	0.579,0.452	1.0,1.0	-0.485
23162	ENSMUSG00000028541.14	B4galt2	chr4	-	117877193	117877577	117877438	117877577	117876879	117876984	23162	9,4	7,11	13,17	4,1	198	99	0.000658452	0.0225672	0.391,0.154	0.619,0.895	-0.484
21382	ENSMUSG00000028149.12	Rap1gds1	chr3	-	138969903	138969975	138969907	138969975	138965867	138965996	21382	6,3	2,7	1,2	0,0	103	99	6.96587e-06	0.000523112	0.742,0.292	1.0,1.0	-0.483
5095	ENSMUSG00000042439.13	Zfp532	chr18	+	65582187	65582398	65582187	65582362	65582896	65583006	5095	13,7	6,7	14,14	0,0	135	99	1.03882e-07	1.35605e-05	0.614,0.423	1.0,1.0	-0.482
23498	ENSMUSG00000075040.9	Zfp408	chr2	-	91648935	91649313	91649150	91649313	91648015	91648077	23498	24,32	39,30	105,47	7,12	198	99	9.68697e-09	1.5701e-06	0.235,0.348	0.882,0.662	-0.481
36554	ENSMUSG00000030796.17	Tead2	chr7	+	45215752	45215995	45215752	45215870	45217212	45217450	36554	0,2	7,7	3,6	3,1	198	99	0.00039911	0.0152635	0.0,0.125	0.333,0.75	-0.479
11918	ENSMUSG00000020828.13	Pld2	chr11	+	70552453	70552751	70552453	70552564	70553334	70553461	11918	3,5	3,1	1,3	0,0	198	99	0.000269793	0.0112366	0.333,0.714	1.0,1.0	-0.477
32920	ENSMUSG00000041313.14	Slc7a1	chr5	-	148399724	148399791	148399786	148399791	148365161	148365251	32920	7,11	6,4	4,5	0,0	161	99	1.71814e-06	0.000160277	0.418,0.628	1.0,1.0	-0.477
10329	ENSMUSG00000020954.16	Strn3	chr12	-	51651155	51651226	51651166	51651226	51650103	51650230	10329	3,2	2,2	2,2	0,0	110	99	0.000383384	0.0148247	0.574,0.474	1.0,1.0	-0.476
30667	ENSMUSG00000030720.16	Cln3	chr7	-	126584367	126584786	126584605	126584786	126584173	126584280	30667	0,1	1,1	7,6	1,3	198	99	0.00092076	0.0291958	0.0,0.333	0.778,0.5	-0.473
41933	ENSMUSG00000037373.12	Ctbp1	chr5	-	33274359	33274579	33274547	33274579	33269441	33269634	41933	16,16	9,20	61,36	4,4	198	99	1.0487e-07	1.36436e-05	0.471,0.286	0.884,0.818	-0.473
26530	ENSMUSG00000026202.13	Tuba4a	chr1	-	75218424	75218624	75218525	75218624	75217211	75217434	26530	5,6	2,3	6,12	0,0	198	99	3.30768e-05	0.0020359	0.556,0.5	1.0,1.0	-0.472
35344	ENSMUSG00000023883.13	Phf10	chr17	-	14946312	14946721	14946654	14946721	14945013	14945184	35344	10,6	13,11	21,25	5,4	198	99	5.05787e-06	0.000399089	0.278,0.214	0.677,0.758	-0.472
2509	ENSMUSG00000034101.14	Ctnnd1	chr2	-	84650320	84650745	84650405	84650745	84626019	84626137	2509	10,10	10,8	34,21	0,5	184	99	5.80756e-05	0.00324124	0.35,0.402	1.0,0.693	-0.471
20085	ENSMUSG00000028053.13	Ash1l	chr3	+	88999727	88999924	88999727	88999875	89001772	89001874	20085	0,0	8,5	7,1	4,1	148	99	9.26902e-07	9.51359e-05	0.0,0.0	0.539,0.401	-0.47
15116	ENSMUSG00000049580.12	Tsku	chr7	-	98361067	98361288	98361241	98361288	98359357	98359467	15116	12,13	32,29	23,19	5,7	198	99	6.12854e-08	8.30662e-06	0.158,0.183	0.697,0.576	-0.466
32998	ENSMUSG00000040520.7	Manea	chr4	-	26346774	26346891	26346837	26346891	26340750	26340998	32998	6,5	5,6	9,9	1,1	162	99	0.000534667	0.0192804	0.423,0.337	0.846,0.846	-0.466
19471	ENSMUSG00000028389.12	Zfp37	chr4	-	62208189	62208446	62208319	62208446	62205023	62205108	19471	3,1	1,3	5,4	0,1	198	99	0.000596061	0.0209267	0.6,0.143	1.0,0.667	-0.462
8465	ENSMUSG00000049295.17	Zfp219	chr14	-	52019596	52019995	52019747	52019995	52009969	52010058	8465	5,7	14,12	23,5	4,2	198	99	2.62838e-05	0.00166793	0.152,0.226	0.742,0.556	-0.46
37880	ENSMUSG00000055720.10	Ubl7	chr9	+	57910985	57911136	57910985	57911059	57914553	57914673	37880	2,3	2,2	3,5	0,1	176	99	0.000881191	0.0282376	0.36,0.458	1.0,0.738	-0.46
14661	ENSMUSG00000015942.9	Gtf2ird2	chr5	+	134191179	134191427	134191179	134191277	134192575	134192714	14661	6,7	3,7	12,9	2,0	198	99	0.000783985	0.0258012	0.5,0.333	0.75,1.0	-0.459
9961	ENSMUSG00000002768.8	Mea1	chr17	+	46681179	46681408	46681179	46681272	46681616	46681897	9961	0,1	5,9	6,7	6,2	198	99	8.76132e-06	0.00064063	0.0,0.053	0.333,0.636	-0.458
2396	ENSMUSG00000034032.15	Rpap1	chr2	-	119787186	119787297	119787220	119787297	119783733	119783970	2396	2,5	50,23	27,13	14,10	133	99	2.88336e-11	9.19366e-09	0.029,0.139	0.589,0.492	-0.456
16365	ENSMUSG00000086035.1	Gm12610	chr4	+	89460928	89461035	89460928	89460964	89463254	89463487	16365	2,9	2,2	4,5	0,0	170	99	0.000924961	0.0293005	0.368,0.724	1.0,1.0	-0.454
6750	ENSMUSG00000000134.17	Tfe3	chrX	+	7763948	7764160	7763948	7764028	7765506	7765620	6750	9,6	3,6	31,18	3,0	198	99	0.000475246	0.0176474	0.6,0.333	0.838,1.0	-0.453
6196	ENSMUSG00000034681.17	Rnps1	chr17	+	24414564	24414881	24414564	24414744	24415040	24416838	6196	1,4	3,1	2,5	0,1	198	99	0.00140355	0.0394495	0.143,0.667	1.0,0.714	-0.452
8754	ENSMUSG00000048154.17	Kmt2d	chr15	-	98856606	98856828	98856612	98856828	98856269	98856389	8754	12,12	14,6	6,6	0,0	105	99	1.47808e-06	0.000140925	0.447,0.653	1.0,1.0	-0.45
10205	ENSMUSG00000097061.2	9330151L19Rik	chr12	+	69197210	69197615	69197210	69197301	69197727	69199867	10205	6,4	2,2	5,4	0,0	198	99	0.000322612	0.0128846	0.6,0.5	1.0,1.0	-0.45
31014	ENSMUSG00000006019.15	Dhx34	chr7	-	16221683	16221993	16221848	16221993	16217987	16218950	31014	7,7	2,4	7,2	0,0	198	99	5.35141e-06	0.000415509	0.636,0.467	1.0,1.0	-0.449
4875	ENSMUSG00000063904.4	Dpp3	chr19	-	4927950	4928247	4928214	4928247	4926784	4927059	4875	5,5	17,10	16,10	4,4	198	99	1.60618e-05	0.00108285	0.128,0.2	0.667,0.556	-0.448
35523	ENSMUSG00000030079.15	Ruvbl1	chr6	+	88465726	88465950	88465726	88465823	88467565	88467652	35523	3,2	4,1	2,4	0,1	198	99	0.0010347	0.0317179	0.273,0.5	1.0,0.667	-0.447
11454	ENSMUSG00000020516.15	Rps6kb1	chr11	-	86517150	86517249	86517232	86517249	86516090	86516191	11454	7,11	12,5	13,7	1,1	181	99	0.000553771	0.0197812	0.242,0.546	0.877,0.793	-0.441
34116	ENSMUSG00000001158.13	Snrnp27	chr6	-	86684224	86684491	86684228	86684491	86682855	86682976	34116	9,6	12,15	7,10	1,4	103	99	0.0009838	0.03048	0.419,0.278	0.871,0.706	-0.44
3087	ENSMUSG00000032641.18	Gpr19	chr6	-	134896857	134897213	134897161	134897213	134887629	134887785	3087	29,16	45,40	68,56	24,12	198	99	8.78366e-11	2.47597e-08	0.244,0.167	0.586,0.7	-0.438
16521	ENSMUSG00000009418.16	Nav1	chr1	-	135453832	135454142	135454044	135454142	135453192	135453288	16521	11,1	29,29	19,9	7,5	198	99	1.58296e-07	1.99926e-05	0.159,0.017	0.576,0.474	-0.437
38421	ENSMUSG00000037772.13	Mrpl23	chr7	+	142533011	142533191	142533011	142533166	142535004	142535127	38421	0,1	6,5	1,5	3,1	124	99	0.000769787	0.0254199	0.0,0.138	0.21,0.8	-0.436
5371	ENSMUSG00000024423.6	Impact	chr18	+	12974297	12974540	12974297	12974475	12974712	12974841	5371	7,8	3,4	17,5	0,0	164	99	4.59517e-06	0.000370855	0.585,0.547	1.0,1.0	-0.434
18793	ENSMUSG00000001025.8	S100a6	chr3	+	90613726	90614059	90613726	90613908	90614190	90614414	18793	8,2	2,2	7,13	0,1	198	99	0.00159802	0.0434522	0.667,0.333	1.0,0.867	-0.433
23159	ENSMUSG00000028541.14	B4galt2	chr4	-	117877086	117877577	117877438	117877577	117876879	117876984	23159	11,7	7,11	15,17	4,1	198	99	0.0014332	0.0399939	0.44,0.241	0.652,0.895	-0.433
9682	ENSMUSG00000009739.17	Pou6f1	chr15	-	100586336	100586772	100586643	100586772	100585874	100586128	9682	11,21	19,15	2,4	1,0	198	99	0.00133162	0.0379765	0.224,0.412	0.5,1.0	-0.432
18592	ENSMUSG00000053192.9	Mllt11	chr3	-	95229994	95230472	95230370	95230472	95229051	95229205	18592	0,2	3,6	11,3	8,1	198	99	0.00114414	0.0341849	0.0,0.143	0.407,0.6	-0.432
21893	ENSMUSG00000026409.14	Pfkfb2	chr1	-	130697882	130698085	130697905	130698085	130691014	130691148	21893	12,4	8,6	3,4	0,1	122	99	0.000490438	0.0181006	0.549,0.351	1.0,0.764	-0.432
34560	ENSMUSG00000034908.16	Sidt2	chr9	-	45952739	45952913	45952748	45952913	45951950	45952052	34560	17,5	8,5	6,6	0,0	108	99	4.74569e-06	0.000380634	0.661,0.478	1.0,1.0	-0.43
2232	ENSMUSG00000026193.15	Fn1	chr1	-	71597280	71598463	71598373	71598463	71590766	71590892	2232	16,19	9,11	46,38	3,2	198	99	9.68477e-07	9.8769e-05	0.471,0.463	0.885,0.905	-0.428
29117	ENSMUSG00000009687.14	Fxyd5	chr7	-	31041727	31042078	31042046	31042078	31041396	31041457	29117	11,8	6,5	25,14	0,2	198	99	5.76723e-05	0.00322335	0.478,0.444	1.0,0.778	-0.428
14465	ENSMUSG00000039842.15	Mcph1	chr8	+	18627106	18627318	18627106	18627297	18629545	18629635	14465	5,4	6,4	5,3	0,1	120	99	0.000197431	0.00874723	0.407,0.452	1.0,0.712	-0.426
16222	ENSMUSG00000024387.13	Csnk2b	chr17	-	35120679	35121030	35121024	35121030	35120444	35120527	16222	5,4	9,3	24,16	6,2	198	99	0.000945469	0.0296951	0.217,0.4	0.667,0.8	-0.425
27770	ENSMUSG00000059555.6	Tor4a	chr2	-	25196481	25196771	25196545	25196771	25195791	25195925	27770	5,6	3,2	5,8	0,0	163	99	3.75481e-05	0.00226848	0.503,0.646	1.0,1.0	-0.425
25469	ENSMUSG00000039178.9	Tbc1d19	chr5	+	53830454	53830555	53830454	53830500	53831388	53831488	25469	3,5	3,1	15,6	0,0	154	99	0.000686815	0.0231317	0.391,0.763	1.0,1.0	-0.423
12192	ENSMUSG00000032633.12	Flcn	chr11	-	59795473	59795575	59795506	59795575	59795140	59795264	12192	7,3	6,1	3,3	0,0	132	99	3.50585e-06	0.000299074	0.467,0.692	1.0,1.0	-0.42
31897	ENSMUSG00000044134.9	Pheta1	chr5	+	121851167	121851652	121851167	121851265	121852550	121854632	31897	8,7	1,6	6,4	0,0	198	99	1.23791e-05	0.00085532	0.8,0.368	1.0,1.0	-0.416
11919	ENSMUSG00000020828.13	Pld2	chr11	+	70552453	70552754	70552453	70552564	70553334	70553461	11919	5,5	3,1	1,2	0,0	198	99	0.000451206	0.0168931	0.455,0.714	1.0,1.0	-0.415
27997	ENSMUSG00000054766.13	Set	chr2	+	30068959	30069413	30068959	30069102	30069517	30069631	27997	24,14	8,7	53,39	2,0	198	99	1.72181e-07	2.1606e-05	0.6,0.5	0.93,1.0	-0.415
33529	ENSMUSG00000029669.14	Tspan12	chr6	-	21852405	21852515	21852435	21852515	21852011	21852167	33529	6,7	2,6	7,6	0,0	129	99	2.34319e-06	0.000208581	0.697,0.472	1.0,1.0	-0.415
17006	ENSMUSG00000028443.6	Nudt2	chr4	+	41469770	41469887	41469770	41469880	41477513	41477647	17006	5,6	6,2	7,4	0,0	106	99	4.83217e-06	0.000386772	0.438,0.737	1.0,1.0	-0.412
34559	ENSMUSG00000034908.16	Sidt2	chr9	-	45952535	45952913	45952748	45952913	45951950	45952052	34559	31,11	8,5	13,11	0,0	198	99	3.00959e-06	0.000261324	0.66,0.524	1.0,1.0	-0.408
29309	ENSMUSG00000026238.14	Ptma	chr1	+	86529172	86529516	86529172	86529244	86529730	86529804	29309	93,62	163,99	360260	92,82	198	99	0	0	0.222,0.238	0.662,0.613	-0.407
37131	ENSMUSG00000036580.15	Spg20	chr3	+	55112386	55112808	55112386	55112491	55116983	55117795	37131	26,23	68,46	39,27	13,10	198	99	1.24367e-10	3.33646e-08	0.16,0.2	0.6,0.574	-0.407
5096	ENSMUSG00000042439.13	Zfp532	chr18	+	65582187	65582657	65582187	65582362	65582896	65583006	5096	20,18	6,7	42,28	0,0	198	99	1.116e-08	1.74346e-06	0.625,0.563	1.0,1.0	-0.406
24075	ENSMUSG00000028041.17	Adam15	chr3	-	89340862	89341250	89341113	89341250	89340054	89340179	24075	6,10	6,2	12,21	1,0	198	99	7.02009e-05	0.00382467	0.333,0.714	0.857,1.0	-0.405
29551	ENSMUSG00000033970.15	Rfc3	chr5	-	151650723	151651195	151650909	151651195	151649871	151650009	29551	0,0	8,9	4,2	1,6	198	99	0.000250676	0.0106455	0.0,0.0	0.667,0.143	-0.405
40434	ENSMUSG00000036036.15	Zfp57	chr17	+	37003269	37003517	37003269	37003315	37004796	37004903	40434	43,42	148126	211125	69,72	198	99	0	0	0.127,0.143	0.605,0.465	-0.4
26171	ENSMUSG00000012296.16	Tjap1	chr17	-	46282378	46282695	46282651	46282695	46264882	46264978	26171	4,22	5,1	27,11	0,0	198	99	0.00017616	0.00803358	0.286,0.917	1.0,1.0	-0.398
37868	ENSMUSG00000014782.16	Plekhg4	chr8	+	105374558	105374981	105374558	105374899	105375463	105375855	37868	13,13	6,9	13,9	2,0	181	99	0.00085573	0.0276019	0.542,0.441	0.78,1.0	-0.398
32575	ENSMUSG00000019518.11	Ap4m1	chr5	+	138172067	138172515	138172067	138172248	138172786	138172893	32575	8,15	5,9	26,38	2,4	198	99	0.000172743	0.00790553	0.444,0.455	0.867,0.826	-0.397
29310	ENSMUSG00000026238.14	Ptma	chr1	+	86529172	86529546	86529172	86529244	86529730	86529804	29310	108,64	163,99	364269	92,82	198	99	0	0	0.249,0.244	0.664,0.621	-0.396
3344	ENSMUSG00000035713.15	Usp35	chr7	-	97315079	97315178	97315086	97315178	97314733	97314927	3344	1,0	1,2	2,7	5,0	106	99	0.0015611	0.0428258	0.483,0.0	0.272,1.0	-0.395
19069	ENSMUSG00000029012.11	Orc5	chr5	-	22549930	22550304	22550100	22550304	22547923	22548016	19069	1,0	3,1	5,7	3,4	198	99	0.000499367	0.0183506	0.143,0.0	0.455,0.467	-0.39
2598	ENSMUSG00000001248.15	Gramd1a	chr7	-	31135525	31135739	31135596	31135739	31134413	31134517	2598	132132	157160	311220	49,72	170	99	3.76366e-14	2.36139e-11	0.329,0.325	0.787,0.64	-0.387
3090	ENSMUSG00000022538.20	Lsg1	chr16	-	30577798	30577997	30577898	30577997	30574545	30574606	3090	11,7	7,3	36,41	1,5	198	99	0.00056114	0.0199709	0.44,0.538	0.947,0.804	-0.386
6749	ENSMUSG00000000134.17	Tfe3	chrX	+	7763948	7764160	7763948	7763998	7765506	7765620	6749	10,4	41,34	21,14	7,14	198	99	3.63605e-06	0.000306633	0.109,0.056	0.6,0.333	-0.384
24115	ENSMUSG00000026031.15	Cflar	chr1	+	58713570	58713949	58713570	58713659	58726305	58726732	24115	38,27	43,31	78,53	12,17	198	99	1.91415e-07	2.36639e-05	0.306,0.303	0.765,0.609	-0.383
39659	ENSMUSG00000036879.15	Phkb	chr8	+	85840990	85841390	85840990	85841057	85843020	85843112	39659	17,12	9,2	10,9	0,0	198	99	4.17668e-06	0.000341329	0.486,0.75	1.0,1.0	-0.382
3541	ENSMUSG00000002342.17	Tmem161a	chr8	+	70180705	70180868	70180705	70180849	70181148	70181323	3541	11,7	4,5	19,15	0,0	118	99	9.87031e-07	0.000100249	0.698,0.54	1.0,1.0	-0.381
24480	ENSMUSG00000004317.14	Clcn5	chrX	-	7318282	7318488	7318383	7318488	7316658	7316823	24480	0,0	15,14	3,5	2,5	198	99	1.56157e-06	0.000147798	0.0,0.0	0.429,0.333	-0.381
16364	ENSMUSG00000086035.1	Gm12610	chr4	+	89460928	89461000	89460928	89460964	89463254	89463487	16364	3,7	2,2	6,5	0,0	135	99	0.00139187	0.0392388	0.524,0.72	1.0,1.0	-0.378
20145	ENSMUSG00000027642.15	Rpn2	chr2	+	157279425	157279799	157279425	157279546	157283583	157283777	20145	15,5	2,3	16,3	0,0	198	99	0.000115766	0.005737	0.789,0.455	1.0,1.0	-0.378
30721	ENSMUSG00000033285.15	Wdr3	chr3	-	100160817	100161200	100161019	100161200	100159765	100159920	30721	13,11	19,17	34,27	8,10	198	99	1.42545e-05	0.000973039	0.255,0.244	0.68,0.574	-0.378
26659	ENSMUSG00000071644.10	Eef1g	chr19	+	8967040	8967522	8967040	8967349	8968215	8968374	26659	34,14	7,6	25,17	0,0	198	99	1.01453e-06	0.000102774	0.708,0.538	1.0,1.0	-0.377
5204	ENSMUSG00000044024.16	Rell2	chr18	+	37956327	37956821	37956327	37956567	37956928	37956994	5204	2,2	5,8	9,6	4,3	198	99	0.00162738	0.0439314	0.167,0.111	0.529,0.5	-0.375
18606	ENSMUSG00000005968.14	Tuft1	chr3	-	94622393	94622590	94622509	94622590	94622050	94622145	18606	2,6	3,3	15,2	0,1	198	99	0.000527198	0.0191306	0.25,0.5	1.0,0.5	-0.375
26584	ENSMUSG00000033021.16	Gmppa	chr1	+	75436153	75436445	75436153	75436312	75436783	75436838	26584	20,14	46,29	56,44	11,33	198	99	0.000121346	0.00593755	0.179,0.194	0.718,0.4	-0.372
18522	ENSMUSG00000025337.10	Sbds	chr5	-	130255089	130255405	130255143	130255405	130253938	130254009	18522	1,0	2,7	3,3	2,2	153	99	0.000311347	0.0125118	0.244,0.0	0.493,0.493	-0.371
275	ENSMUSG00000080316.11	Spaca6	chr17	+	17837664	17837771	17837664	17837769	17838086	17838243	275	2,0	14,6	3,7	6,6	101	99	0.000668776	0.0227011	0.123,0.0	0.329,0.533	-0.37
25783	ENSMUSG00000026260.12	Ndufa10	chr1	-	92462930	92462988	92462949	92462988	92462290	92462345	25783	0,1	5,7	3,5	4,5	118	99	0.000169218	0.00780852	0.0,0.107	0.386,0.456	-0.368
13736	ENSMUSG00000035697.14	Arhgap45	chr10	+	80026656	80026750	80026656	80026734	80026822	80026927	13736	0,0	3,8	1,6	1,14	115	99	8.66513e-05	0.00453666	0.0,0.0	0.463,0.27	-0.367
16596	ENSMUSG00000097207.7	6030443J06Rik	chr5	+	22553758	22553858	22553758	22553803	22553986	22558170	16596	3,6	4,1	9,8	1,0	154	99	0.0011487	0.0342934	0.325,0.794	0.853,1.0	-0.367
41312	ENSMUSG00000051396.15	Gm45902	chr2	-	3510992	3511097	3511014	3511097	3508292	3509095	41312	5,1	26,16	14,13	17,10	121	99	2.02104e-05	0.00131689	0.136,0.049	0.403,0.515	-0.367
42160	ENSMUSG00000042502.10	Cd2bp2	chr7	-	127195539	127195942	127195914	127195942	127195360	127195461	42160	21,19	47,28	71,33	16,18	198	99	2.77627e-06	0.000242957	0.183,0.253	0.689,0.478	-0.365
24463	ENSMUSG00000026436.15	Elk4	chr1	+	132008098	132008419	132008098	132008187	132014382	132014598	24463	17,22	13,6	39,38	2,3	198	99	0.000157115	0.00732826	0.395,0.647	0.907,0.864	-0.364
18562	ENSMUSG00000022144.4	Gdnf	chr15	+	7815588	7815765	7815588	7815687	7834347	7837575	18562	12,5	3,2	4,6	0,0	177	99	0.000172301	0.00789458	0.691,0.583	1.0,1.0	-0.363
39351	ENSMUSG00000002393.14	Nr2f6	chr8	-	71380825	71380909	71380852	71380909	71378388	71378483	39351	2,1	12,18	6,3	9,2	126	99	0.00142076	0.0398183	0.116,0.042	0.344,0.541	-0.363
8484	ENSMUSG00000035953.14	Pip4p1	chr14	-	50928744	50929051	50929005	50929051	50927865	50928037	8484	32,33	16,10	108,87	4,4	198	99	2.19651e-08	3.26123e-06	0.5,0.623	0.931,0.916	-0.362
16736	ENSMUSG00000042625.16	Safb2	chr17	-	56576627	56576905	56576877	56576905	56575354	56576012	16736	29,25	132103	44,38	29,19	198	99	7.77156e-16	7.19795e-13	0.099,0.108	0.431,0.5	-0.362
19730	ENSMUSG00000059851.15	Kmt5c	chr7	+	4742103	4742529	4742103	4742287	4742618	4742728	19730	28,22	158138	86,51	41,44	198	99	0	0	0.081,0.074	0.512,0.367	-0.362
2688	ENSMUSG00000078923.10	Ube2v1	chr2	-	167629068	167629288	167629169	167629288	167617828	167617977	2688	12,9	28,26	31,17	10,11	198	99	1.00511e-05	0.000722712	0.176,0.148	0.608,0.436	-0.36
15127	ENSMUSG00000060860.8	Ube2s	chr7	-	4811761	4812124	4812008	4812124	4811408	4811556	15127	20,28	52,40	107,54	39,21	198	99	2.31764e-10	5.70609e-08	0.161,0.259	0.578,0.562	-0.36
22792	ENSMUSG00000044037.15	Als2cl	chr9	+	110880205	110880500	110880205	110880229	110884014	110884146	22792	7,8	20,11	36,16	14,6	198	99	3.30417e-05	0.0020359	0.149,0.267	0.563,0.571	-0.359
26914	ENSMUSG00000020069.16	Hnrnph3	chr10	-	63023698	63023847	63023744	63023847	63019392	63019527	26914	0,1	10,13	7,4	3,15	145	99	0.00011981	0.00588461	0.0,0.05	0.614,0.154	-0.359
5823	ENSMUSG00000015474.16	Ppt2	chr17	-	34627121	34627581	34627324	34627581	34626804	34626995	5823	11,5	68,59	51,26	22,31	198	99	1.23737e-09	2.60181e-07	0.075,0.041	0.537,0.295	-0.358
5827	ENSMUSG00000015474.16	Ppt2	chr17	-	34627165	34627581	34627324	34627581	34626804	34626995	5827	11,5	68,59	51,26	22,31	198	99	1.23737e-09	2.60181e-07	0.075,0.041	0.537,0.295	-0.358
5830	ENSMUSG00000015474.16	Ppt2	chr17	-	34627175	34627581	34627324	34627581	34626804	34626995	5830	11,5	68,59	51,26	22,31	198	99	1.23737e-09	2.60181e-07	0.075,0.041	0.537,0.295	-0.358
8819	ENSMUSG00000024045.6	Akap8	chr17	-	32320484	32320725	32320616	32320725	32318770	32318809	8819	10,8	2,3	2,3	0,0	198	99	0.00010207	0.005197	0.714,0.571	1.0,1.0	-0.358
32358	ENSMUSG00000040734.14	Ppp1r13l	chr7	+	19360645	19360836	19360645	19360734	19361026	19361316	32358	14,9	8,1	4,1	0,0	198	99	1.62479e-05	0.0010935	0.467,0.818	1.0,1.0	-0.358
38826	ENSMUSG00000031557.16	Plekha2	chr8	-	25101487	25101771	25101491	25101771	25088341	25088505	38826	18,15	11,7	3,3	0,0	103	99	3.42829e-05	0.00210017	0.611,0.673	1.0,1.0	-0.358
40065	ENSMUSG00000031818.12	Cox4i1	chr8	+	120668221	120668602	120668221	120668502	120669308	120669821	40065	0,2	8,0	9,5	0,1	198	99	0.00140579	0.0394839	0.0,1.0	1.0,0.714	-0.357
3880	ENSMUSG00000025261.17	Huwe1	chrX	+	151803260	151803569	151803260	151803382	151804445	151804540	3880	10,11	2,4	2,5	0,0	198	99	3.59818e-05	0.00219388	0.714,0.579	1.0,1.0	-0.354
12417	ENSMUSG00000036620.14	Mgat4b	chr11	+	50232944	50233338	50232944	50233075	50233463	50233657	12417	8,10	2,3	10,13	0,0	198	99	0.000153679	0.00721122	0.667,0.625	1.0,1.0	-0.354
5832	ENSMUSG00000015474.16	Ppt2	chr17	-	34627246	34627581	34627324	34627581	34626804	34626995	5832	12,4	68,59	45,23	22,31	177	99	9.22898e-09	1.50212e-06	0.09,0.037	0.534,0.293	-0.35
35488	ENSMUSG00000045482.16	Trrap	chr5	+	144768543	144768940	144768543	144768721	144771088	144771249	35488	4,3	32,40	25,14	14,15	198	99	1.34891e-09	2.76171e-07	0.059,0.036	0.472,0.318	-0.348
7396	ENSMUSG00000022476.8	Polr3h	chr15	-	81925104	81925447	81925227	81925447	81922408	81922505	7396	20,19	48,40	51,25	18,14	198	99	6.63724e-08	8.93386e-06	0.172,0.192	0.586,0.472	-0.347
39758	ENSMUSG00000001062.18	Vps9d1	chr8	-	123248550	123248676	123248613	123248676	123248153	123248206	39758	3,0	35,44	23,17	30,14	162	99	2.44504e-12	9.90752e-10	0.05,0.0	0.319,0.426	-0.347
30906	ENSMUSG00000038241.16	Cep250	chr2	+	155988311	155988609	155988311	155988432	155989498	155989620	30906	11,6	208178	55,28	41,28	198	99	0	0	0.026,0.017	0.401,0.333	-0.345
31050	ENSMUSG00000027285.13	Haus2	chr2	+	120609594	120609673	120609594	120609658	120612337	120612430	31050	0,0	5,6	2,5	6,5	114	99	2.17634e-05	0.00141099	0.0,0.0	0.224,0.465	-0.345
35785	ENSMUSG00000033773.14	Rpap2	chr5	+	107601730	107601981	107601730	107601841	107603525	107603624	35785	10,10	4,3	27,15	2,0	198	99	0.00122439	0.0358652	0.556,0.625	0.871,1.0	-0.345
26608	ENSMUSG00000006576.16	Slc4a3	chr1	+	75547232	75547532	75547232	75547398	75547943	75548221	26608	25,19	8,4	38,25	0,0	198	99	1.83597e-07	2.28908e-05	0.61,0.704	1.0,1.0	-0.343
25828	ENSMUSG00000040883.17	Tmem205	chr9	-	21927180	21927288	21927199	21927288	21926248	21926357	25828	5,5	4,2	4,8	0,1	118	99	0.000746522	0.0247779	0.512,0.677	1.0,0.87	-0.341
33416	ENSMUSG00000002409.18	Dyrk1b	chr7	+	28185295	28185749	28185295	28185436	28185833	28186029	33416	15,19	40,31	24,17	15,5	198	99	0.000185888	0.00833071	0.158,0.235	0.444,0.63	-0.341
13552	ENSMUSG00000022336.3	Eif3e	chr15	-	43282390	43282626	43282404	43282626	43278307	43278422	13552	14,3	1,4	5,8	0,0	113	99	0.00119946	0.0352675	0.925,0.397	1.0,1.0	-0.339
19832	ENSMUSG00000028044.6	Cks1b	chr3	-	89417721	89418219	89418108	89418219	89416273	89416401	19832	0,0	1,1	2,3	1,7	198	99	0.00168671	0.045064	0.0,0.0	0.5,0.176	-0.338
28489	ENSMUSG00000006395.16	Hyi	chr4	+	118359998	118360439	118359998	118360231	118361615	118361730	28489	2,3	13,24	22,24	29,11	198	99	8.3626e-06	0.000613375	0.071,0.059	0.275,0.522	-0.334
41063	ENSMUSG00000001964.14	Emd	chrX	+	74254686	74255029	74254686	74254871	74255207	74255315	41063	0,1	2,0	3,4	0,1	198	99	0.0014231	0.0398263	0.0,1.0	1.0,0.667	-0.334
28938	ENSMUSG00000086389.1	Gm15998	chr3	+	89315956	89316121	89315956	89316118	89317827	89318907	28938	1,0	11,5	9,1	5,8	102	99	0.000764392	0.0252848	0.081,0.0	0.636,0.108	-0.332
13215	ENSMUSG00000055531.12	Cpsf6	chr10	-	117355781	117356140	117355934	117356140	117349038	117349501	13215	42,39	57,50	62,46	19,16	198	99	2.74626e-08	3.97136e-06	0.269,0.281	0.62,0.59	-0.33
29947	ENSMUSG00000045302.13	Preb	chr5	-	30958232	30958543	30958470	30958543	30950852	30955737	29947	16,7	4,2	51,47	1,0	198	99	3.98762e-05	0.00237547	0.667,0.636	0.962,1.0	-0.33
10161	ENSMUSG00000051367.8	Six1	chr12	-	73044988	73045291	73045013	73045291	73043773	73043829	10161	5,5	3,3	11,5	0,1	124	99	0.000393379	0.0150912	0.571,0.571	1.0,0.8	-0.329
12174	ENSMUSG00000020537.9	Drg2	chr11	+	60456221	60456706	60456221	60456667	60459441	60459531	12174	12,8	2,5	9,5	0,0	138	99	2.84643e-05	0.00179033	0.811,0.534	1.0,1.0	-0.327
13818	ENSMUSG00000042570.14	Mier2	chr10	-	79542032	79542481	79542404	79542481	79541513	79541934	13818	34,49	139130	90,56	30,59	198	99	3.65663e-06	0.000306633	0.109,0.159	0.6,0.322	-0.327
16476	ENSMUSG00000028483.13	Snapc3	chr4	+	83453040	83453214	83453040	83453129	83453953	83454148	16476	6,11	6,0	7,10	0,0	184	99	0.00158885	0.0433425	0.35,1.0	1.0,1.0	-0.325
15520	ENSMUSG00000016510.11	Mtif3	chr5	-	146963432	146963800	146963765	146963800	146958947	146959276	15520	0,0	11,8	7,3	6,4	198	99	1.88203e-06	0.000171054	0.0,0.0	0.368,0.273	-0.321
33781	ENSMUSG00000087177.7	E130307A14Rik	chr10	-	39654288	39654688	39654521	39654688	39645555	39645808	33781	11,10	3,2	4,10	0,0	198	99	0.00032617	0.0129951	0.647,0.714	1.0,1.0	-0.32
39249	ENSMUSG00000031858.16	Mau2	chr8	-	70023610	70023697	70023613	70023697	70022355	70022699	39249	6,5	2,3	5,9	0,0	102	99	0.000274887	0.0113877	0.744,0.618	1.0,1.0	-0.319
36321	ENSMUSG00000046364.14	Rpl27a	chr7	+	109519584	109519917	109519584	109519648	109520467	109520642	36321	76,78	60,71	241158	52,37	198	99	2.93054e-12	1.17524e-09	0.388,0.355	0.699,0.681	-0.318
1955	ENSMUSG00000044783.16	Hjurp	chr1	-	88275027	88275097	88275041	88275097	88267947	88268026	1955	61,68	115,89	106,74	34,40	113	99	1.0312e-08	1.63591e-06	0.317,0.401	0.732,0.618	-0.316
22849	ENSMUSG00000018501.17	Ncor1	chr11	-	62403280	62403462	62403435	62403462	62401200	62401267	22849	63,46	117,88	48,65	22,29	198	99	1.53137e-10	3.97136e-08	0.212,0.207	0.522,0.528	-0.316
36322	ENSMUSG00000046364.14	Rpl27a	chr7	+	109519584	109520023	109519584	109519648	109520467	109520642	36322	76,80	60,71	240159	52,37	198	99	4.45677e-12	1.72413e-09	0.388,0.36	0.698,0.682	-0.316
21896	ENSMUSG00000026409.14	Pfkfb2	chr1	-	130715376	130715734	130715713	130715734	130714465	130714576	21896	8,8	1,3	1,2	0,0	198	99	0.00165709	0.0443945	0.8,0.571	1.0,1.0	-0.315
12700	ENSMUSG00000025871.18	4833439L19Rik	chr13	-	54564184	54564619	54564514	54564619	54556526	54556651	12700	30,20	6,7	26,34	1,0	198	99	4.98239e-06	0.000395541	0.714,0.588	0.929,1.0	-0.314
1171	ENSMUSG00000070425.13	Xntrpc	chr7	+	102078732	102078897	102078732	102078818	102079004	102079177	1171	21,23	30,33	53,46	18,20	178	99	2.61752e-06	0.000230366	0.28,0.279	0.621,0.561	-0.311
2092	ENSMUSG00000024163.17	Mapk8ip3	chr17	-	24917994	24918136	24918087	24918136	24914458	24914705	2092	86102	31,23	101,74	4,1	192	99	1.07829e-09	2.31743e-07	0.589,0.696	0.929,0.974	-0.309
12390	ENSMUSG00000007850.16	Hnrnph1	chr11	+	50383241	50383727	50383241	50383314	50383830	50383920	12390	9,7	84,51	59,46	41,50	198	99	7.66054e-15	5.51843e-12	0.051,0.064	0.418,0.315	-0.309
19470	ENSMUSG00000028389.12	Zfp37	chr4	-	62208189	62208361	62208328	62208361	62205023	62205108	19470	3,1	15,16	5,8	8,4	198	99	0.000697911	0.0234041	0.091,0.03	0.238,0.5	-0.308
26047	ENSMUSG00000038564.11	Ift172	chr5	-	31285920	31286117	31286077	31286117	31285762	31285828	26047	7,1	126118	23,20	24,21	198	99	0	0	0.027,0.004	0.324,0.323	-0.308
41793	ENSMUSG00000060450.14	Rnf14	chr18	+	38297271	38297575	38297271	38297431	38299753	38299926	41793	46,30	16,9	47,58	0,6	198	99	6.21074e-05	0.00341722	0.59,0.625	1.0,0.829	-0.307
5634	ENSMUSG00000002831.14	Plin4	chr17	-	56108517	56108629	56108587	56108629	56106116	56107374	5634	6,1	42,39	5,12	4,18	169	99	1.14475e-05	0.000803807	0.077,0.015	0.423,0.281	-0.306
12773	ENSMUSG00000020424.3	Castor1	chr11	+	4218224	4218426	4218224	4218340	4218947	4219018	12773	15,8	2,3	4,2	0,0	185	99	0.000252074	0.0106932	0.801,0.588	1.0,1.0	-0.305
41190	ENSMUSG00000021280.9	Exoc3l4	chr12	+	111428656	111429086	111428656	111428809	111429414	111429536	41190	0,0	8,2	3,4	2,9	198	99	0.00015894	0.00739104	0.0,0.0	0.429,0.182	-0.305
2698	ENSMUSG00000044976.17	Wdr72	chr9	+	74148201	74148383	74148201	74148347	74148720	74148817	2698	9,11	6,5	4,5	1,0	135	99	0.000911209	0.0289355	0.524,0.617	0.746,1.0	-0.302
2790	ENSMUSG00000061904.12	Slc25a3	chr10	-	91122107	91122331	91122206	91122331	91119526	91119706	2790	136138	41,39	409267	16,9	198	99	0	0	0.624,0.639	0.927,0.937	-0.301
18677	ENSMUSG00000028494.12	Plin2	chr4	-	86669533	86669768	86669700	86669768	86668649	86668705	18677	16,24	14,16	54,52	11,12	198	99	0.000220777	0.0095744	0.364,0.429	0.711,0.684	-0.301
39069	ENSMUSG00000031634.13	Ufsp2	chr8	+	45975577	45975798	45975577	45975777	45979208	45979295	39069	16,8	5,6	7,10	1,0	120	99	0.000261872	0.0109744	0.725,0.524	0.852,1.0	-0.301
39261	ENSMUSG00000002342.17	Tmem161a	chr8	+	70177240	70177508	70177240	70177338	70180538	70180599	39261	30,19	8,8	45,29	2,2	198	99	0.000287763	0.0117956	0.652,0.543	0.918,0.879	-0.301
10033	ENSMUSG00000021243.14	Fcf1	chr12	+	84970896	84971346	84970896	84970965	84972989	84973061	10033	0,1	2,0	5,3	0,1	198	99	0.00153352	0.0422659	0.0,1.0	1.0,0.6	-0.3
15521	ENSMUSG00000016510.11	Mtif3	chr5	-	146963502	146963800	146963765	146963800	146958947	146959276	15521	0,0	11,8	8,2	6,4	198	99	4.05868e-06	0.00033379	0.0,0.0	0.4,0.2	-0.3
22525	ENSMUSG00000047193.16	Dync2h1	chr9	-	7183791	7184216	7184017	7184216	7176762	7177230	22525	0,1	2,0	1,3	0,1	198	99	0.00153787	0.0423076	0.0,1.0	1.0,0.6	-0.3
40515	ENSMUSG00000032178.14	Ilf3	chr9	+	21387682	21388150	21387682	21387797	21388508	21388753	40515	34,20	43,37	47,18	13,11	198	99	0.000256976	0.0108303	0.283,0.213	0.644,0.45	-0.299
7193	ENSMUSG00000003352.14	Cacnb3	chr15	+	98640341	98640779	98640341	98640750	98641176	98641257	7193	3,3	46,54	18,3	15,9	128	99	6.05892e-06	0.000463049	0.048,0.041	0.481,0.205	-0.298
2847	ENSMUSG00000032827.15	Ppp1r9a	chr6	+	5154008	5154318	5154008	5154207	5156120	5156240	2847	1,6	101,98	43,7	20,28	198	99	1.2121e-07	1.56019e-05	0.005,0.03	0.518,0.111	-0.297
2080	ENSMUSG00000035597.19	Prpf39	chr12	+	65043231	65043877	65043231	65043357	65044005	65044124	2080	132127	127117	331232	56,99	198	99	4.99436e-06	0.000395684	0.342,0.352	0.747,0.54	-0.296
34554	ENSMUSG00000034908.16	Sidt2	chr9	-	45947540	45947723	45947628	45947723	45946983	45947055	34554	49,53	95,80	82,51	36,25	187	99	1.28915e-09	2.6817e-07	0.214,0.26	0.547,0.519	-0.296
34708	ENSMUSG00000063870.12	Chd4	chr6	+	125096568	125096991	125096568	125096971	125097086	125097371	34708	10,9	5,2	1,3	0,0	119	99	5.9242e-05	0.00329687	0.625,0.789	1.0,1.0	-0.293
13080	ENSMUSG00000025410.10	Dctn2	chr10	+	127277502	127277881	127277502	127277772	127278119	127278222	13080	12,8	2,3	45,19	0,1	198	99	0.000549316	0.0196863	0.75,0.571	1.0,0.905	-0.292
35050	ENSMUSG00000033732.10	Sf3b3	chr8	-	110846557	110846727	110846562	110846727	110844462	110844599	35050	3,8	4,4	7,2	0,1	104	99	0.00113364	0.0340005	0.417,0.656	1.0,0.656	-0.292
8814	ENSMUSG00000024045.6	Akap8	chr17	-	32320457	32320658	32320616	32320658	32318770	32318809	8814	12,12	2,3	18,5	0,0	198	99	0.000374175	0.0145409	0.75,0.667	1.0,1.0	-0.291
5132	ENSMUSG00000024613.16	Tcof1	chr18	-	60832279	60832624	60832426	60832624	60831773	60831995	5132	12,8	37,13	12,10	6,6	198	99	0.000786366	0.0258577	0.14,0.235	0.5,0.455	-0.29
1134	ENSMUSG00000029060.17	Mib2	chr4	-	155658893	155659265	155659122	155659265	155657854	155657959	1134	115106	45,33	73,93	4,8	198	99	6.70249e-08	8.99058e-06	0.561,0.616	0.901,0.853	-0.288
2394	ENSMUSG00000034858.16	Fam214a	chr9	+	75023584	75023746	75023584	75023653	75025650	75025847	2394	14,7	72,88	48,25	29,40	192	99	1.49518e-08	2.28088e-06	0.091,0.039	0.46,0.244	-0.287
13945	ENSMUSG00000033434.15	Gtpbp6	chr5	-	110105224	110105335	110105247	110105335	110104907	110105098	13945	1,0	2,6	4,2	2,5	122	99	0.00175281	0.0463524	0.289,0.0	0.619,0.245	-0.287
39747	ENSMUSG00000022555.12	Dgat1	chr15	-	76504067	76504369	76504348	76504369	76503864	76503972	39747	13,6	5,1	32,22	2,0	198	99	0.00185145	0.0484016	0.565,0.75	0.889,1.0	-0.287
41998	ENSMUSG00000020993.9	Trappc6b	chr12	-	59051219	59051708	59051607	59051708	59050267	59050385	41998	1,0	3,4	5,2	4,2	198	99	0.000763366	0.0252723	0.143,0.0	0.385,0.333	-0.287
24062	ENSMUSG00000078580.3	E430018J23Rik	chr7	-	127393207	127393629	127393289	127393629	127393000	127393114	24062	13,18	15,23	23,18	7,8	181	99	0.00161232	0.0437067	0.322,0.3	0.642,0.552	-0.286
29777	ENSMUSG00000038437.11	Mllt6	chr11	+	97672456	97672682	97672456	97672592	97673492	97673548	29777	31,23	8,5	36,38	1,0	189	99	1.88164e-06	0.000171054	0.67,0.707	0.95,1.0	-0.286
37299	ENSMUSG00000024982.10	Zdhhc6	chr19	-	55315516	55315988	55315554	55315988	55314300	55314772	37299	8,6	2,2	6,4	0,0	137	99	0.00183453	0.0479913	0.743,0.684	1.0,1.0	-0.286
26513	ENSMUSG00000033159.14	Cnppd1	chr1	-	75141699	75142071	75142057	75142071	75141415	75141503	26513	47,39	169177	71,82	53,65	198	99	0	0	0.122,0.099	0.401,0.387	-0.284
41125	ENSMUSG00000032249.14	Anp32a	chr9	+	62344798	62344887	62344798	62344871	62371719	62371869	41125	15,7	4,3	4,9	0,0	115	99	8.13402e-05	0.00433399	0.763,0.668	1.0,1.0	-0.284
19937	ENSMUSG00000029817.11	Tra2a	chr6	-	49252802	49253108	49253029	49253108	49252381	49252515	19937	0,2	6,6	3,6	3,5	198	99	0.00181068	0.0475274	0.0,0.143	0.333,0.375	-0.282
25196	ENSMUSG00000038876.12	Rnf146	chr10	-	29361963	29362442	29361983	29362442	29354066	29354442	25196	15,5	1,4	9,4	0,0	119	99	0.00117579	0.0349682	0.926,0.51	1.0,1.0	-0.282
32390	ENSMUSG00000028465.16	Tln1	chr4	-	43558084	43558460	43558380	43558460	43556620	43556783	32390	16,26	6,2	14,3	0,0	198	99	5.84144e-05	0.00325547	0.571,0.867	1.0,1.0	-0.281
26675	ENSMUSG00000024740.10	Ddb1	chr19	+	10609791	10609974	10609791	10609827	10610701	10610816	26675	68,36	243206	111,84	72,87	198	99	3.33067e-16	3.16007e-13	0.123,0.08	0.435,0.326	-0.279
29516	ENSMUSG00000028410.13	Dnaja1	chr4	+	40722921	40723285	40722921	40723136	40723702	40723844	29516	55,34	106,98	89,58	36,52	198	99	4.15553e-06	0.000340316	0.206,0.148	0.553,0.358	-0.279
29518	ENSMUSG00000028410.13	Dnaja1	chr4	+	40722921	40723384	40722921	40723136	40723702	40723844	29518	56,33	106,98	89,58	36,52	198	99	4.21828e-06	0.000344007	0.209,0.144	0.553,0.358	-0.279
3548	ENSMUSG00000002908.17	Kcnn1	chr8	-	70848174	70848302	70848199	70848302	70846763	70846772	3548	3,6	0,6	2,5	0,0	124	99	0.00106207	0.0323276	1.0,0.444	1.0,1.0	-0.278
6038	ENSMUSG00000024188.16	Luc7l	chr17	+	26253973	26254393	26253973	26254044	26255030	26255125	6038	100,88	65,62	236224	47,50	198	99	4.19957e-10	9.84116e-08	0.435,0.415	0.715,0.691	-0.278
29517	ENSMUSG00000028410.13	Dnaja1	chr4	+	40722921	40723325	40722921	40723136	40723702	40723844	29517	55,35	106,98	90,58	36,52	198	99	5.33373e-06	0.000414964	0.206,0.152	0.556,0.358	-0.278
29525	ENSMUSG00000028410.13	Dnaja1	chr4	+	40723001	40723253	40723001	40723136	40723702	40723844	29525	57,35	106,98	89,60	36,52	198	99	3.15499e-06	0.000272731	0.212,0.152	0.553,0.366	-0.278
2372	ENSMUSG00000052446.17	Zfp961	chr8	+	71965793	71965990	71965793	71965916	71966099	71966160	2372	1,3	8,12	11,13	12,11	173	99	0.000861429	0.0277397	0.067,0.125	0.344,0.403	-0.277
20276	ENSMUSG00000027424.11	Mgme1	chr2	+	144270899	144271072	144270899	144270947	144271914	144272484	20276	57,47	38,34	60,63	12,15	198	99	1.63676e-05	0.00109965	0.429,0.409	0.714,0.677	-0.277
26676	ENSMUSG00000024740.10	Ddb1	chr19	+	10609791	10610072	10609791	10609827	10610701	10610816	26676	64,38	243206	111,82	72,87	198	99	9.99201e-16	8.83384e-13	0.116,0.084	0.435,0.32	-0.277
2508	ENSMUSG00000034101.14	Ctnnd1	chr2	-	84650320	84650745	84650405	84650745	84622010	84622082	2508	10,10	151119	34,21	25,44	184	99	1.56198e-10	4.02392e-08	0.034,0.043	0.423,0.204	-0.275
17359	ENSMUSG00000078485.3	Plekhn1	chr4	-	156230913	156231173	156231084	156231173	156230504	156230686	17359	16,23	3,6	85,50	3,0	198	99	0.00011783	0.00582098	0.727,0.657	0.934,1.0	-0.275
33821	ENSMUSG00000039205.16	Ciz1	chr2	+	32374341	32374755	32374341	32374466	32375484	32375572	33821	9,12	222174	53,37	54,49	198	99	0	0	0.02,0.033	0.329,0.274	-0.275
38846	ENSMUSG00000110148.1	5830408C22Rik	chr8	+	25102178	25102643	25102178	25102211	25109253	25109571	38846	7,4	19,30	17,8	10,9	198	99	0.000153406	0.00720711	0.156,0.062	0.459,0.308	-0.275
7659	ENSMUSG00000022580.13	Rhpn1	chr15	+	75708988	75709119	75708988	75709117	75709236	75709312	7659	0,0	3,2	3,2	6,7	101	99	0.000670839	0.0227512	0.0,0.0	0.329,0.219	-0.274
34692	ENSMUSG00000030330.15	Ing4	chr6	+	125047481	125047741	125047481	125047587	125047901	125047940	34692	19,22	15,16	72,66	22,13	198	99	0.000690015	0.0231793	0.388,0.407	0.621,0.717	-0.272
933	ENSMUSG00000083844.8	Ube2d-ps	chr11	+	5780205	5780653	5780205	5780635	5783891	5784710	933	19,28	20,18	25,35	5,10	117	99	0.00127327	0.0367163	0.446,0.568	0.809,0.748	-0.271
32690	ENSMUSG00000031360.14	Ctps2	chrX	+	162901604	162901839	162901604	162901708	162903433	162903638	32690	18,9	30,20	19,29	11,15	198	99	0.000295296	0.0120509	0.231,0.184	0.463,0.492	-0.27
35469	ENSMUSG00000005575.16	Ube2m	chr7	-	13037362	13037627	13037554	13037627	13036565	13036660	35469	4,10	19,26	22,14	12,15	198	99	0.000427902	0.016192	0.095,0.161	0.478,0.318	-0.27
3959	ENSMUSG00000043384.15	Gprasp1	chrX	+	135743441	135743731	135743441	135743522	135744498	135744575	3959	8,11	29,36	22,15	16,12	198	99	2.42102e-05	0.00155409	0.121,0.133	0.407,0.385	-0.269
24523	ENSMUSG00000085396.7	Firre	chrX	-	50573007	50573351	50573223	50573351	50569276	50570291	24523	0,4	34,19	12,10	28,6	198	99	4.75008e-05	0.00273745	0.0,0.095	0.176,0.455	-0.268
31001	ENSMUSG00000001729.14	Akt1	chr12	-	112673705	112673944	112673840	112673944	112671515	112671654	31001	17,16	3,3	8,13	0,0	198	99	0.000248574	0.0105678	0.739,0.727	1.0,1.0	-0.267
33613	ENSMUSG00000002968.9	Med25	chr7	-	44892094	44892419	44892144	44892419	44891782	44891907	33613	4,0	33,8	9,2	9,5	149	99	0.00084864	0.0274643	0.075,0.0	0.399,0.21	-0.267
2147	ENSMUSG00000009995.17	Taz	chrX	+	74288450	74289019	74288450	74288513	74289104	74289182	2147	38,45	39,40	117101	31,39	198	99	4.72395e-06	0.000379673	0.328,0.36	0.654,0.564	-0.265
25776	ENSMUSG00000009995.17	Taz	chrX	+	74288303	74288718	74288303	74288513	74289104	74289182	25776	20,19	39,40	62,58	31,39	198	99	1.46219e-06	0.000139752	0.204,0.192	0.5,0.426	-0.265
39264	ENSMUSG00000002342.17	Tmem161a	chr8	+	70180705	70181047	70180705	70180849	70181148	70181323	39264	29,22	4,5	67,45	0,0	198	99	1.35701e-06	0.000131313	0.784,0.688	1.0,1.0	-0.264
23741	ENSMUSG00000039630.10	Hnrnpu	chr1	-	178329221	178329407	178329285	178329407	178325242	178325313	23741	0,0	3,3	7,2	7,7	163	99	7.97253e-05	0.0042542	0.0,0.0	0.378,0.148	-0.263
33021	ENSMUSG00000049600.8	Zbtb45	chr7	-	13009422	13009800	13009691	13009800	13008248	13008329	33021	26,20	4,6	22,14	1,0	198	99	0.000216222	0.00941886	0.765,0.625	0.917,1.0	-0.263
41726	ENSMUSG00000006676.16	Usp19	chr9	+	108494372	108494687	108494372	108494523	108494811	108494927	41726	37,30	4,8	44,41	0,0	198	99	1.16385e-06	0.000114617	0.822,0.652	1.0,1.0	-0.263
18672	ENSMUSG00000028494.12	Plin2	chr4	-	86669303	86669768	86669700	86669768	86668649	86668705	18672	22,25	14,16	54,54	11,12	198	99	0.000920906	0.0291958	0.44,0.439	0.711,0.692	-0.262
27215	ENSMUSG00000050605.17	Zfp61	chr7	-	24295709	24295981	24295978	24295981	24294954	24295081	27215	12,5	47,23	29,19	19,22	198	99	1.13558e-05	0.000798809	0.113,0.098	0.433,0.302	-0.262
26877	ENSMUSG00000039105.6	Atp6v1g1	chr4	+	63544771	63545126	63544771	63544980	63548584	63548685	26877	1,0	3,8	11,4	7,7	198	99	0.000106401	0.0053823	0.143,0.0	0.44,0.222	-0.26
41311	ENSMUSG00000051396.15	Gm45902	chr2	-	3510992	3511097	3511014	3511097	3508292	3509020	41311	6,1	31,18	14,11	18,20	121	99	0.000377961	0.0146587	0.137,0.043	0.389,0.31	-0.26
41460	ENSMUSG00000097177.8	9330159M07Rik	chr9	-	88857424	88857871	88857813	88857871	88843509	88844266	41460	34,17	3,5	37,21	0,0	198	99	2.80723e-05	0.00177275	0.85,0.63	1.0,1.0	-0.26
12391	ENSMUSG00000007850.16	Hnrnph1	chr11	+	50383241	50383730	50383241	50383314	50383830	50383920	12391	26,17	84,51	68,52	41,50	198	99	3.20455e-08	4.58297e-06	0.134,0.143	0.453,0.342	-0.259
20501	ENSMUSG00000012126.16	Ubxn11	chr4	+	134123771	134124140	134123771	134123919	134124833	134124954	20501	0,0	4,6	4,3	5,5	198	99	0.000186545	0.00835054	0.0,0.0	0.286,0.231	-0.259
1046	ENSMUSG00000058392.13	Rrp1b	chr17	+	32045928	32046229	32045928	32046011	32048552	32048638	1046	57,40	9,15	95,66	5,2	198	99	7.68517e-05	0.00411781	0.76,0.571	0.905,0.943	-0.258
1326	ENSMUSG00000031832.15	Taf1c	chr8	-	119602757	119602904	119602830	119602904	119601541	119601780	1326	20,10	77,57	41,26	37,28	172	99	2.0754e-08	3.10511e-06	0.13,0.092	0.389,0.348	-0.258
16123	ENSMUSG00000015880.13	Ncapg	chr5	+	45669918	45670390	45669918	45670238	45671019	45671223	16123	1,0	9,8	3,8	5,8	198	99	4.45756e-05	0.00259969	0.053,0.0	0.231,0.333	-0.256
42378	ENSMUSG00000032480.17	Dhx30	chr9	-	110116774	110117087	110116838	110117087	110115490	110115582	42378	9,8	33,31	24,20	22,19	163	99	3.91522e-05	0.00233951	0.142,0.136	0.399,0.39	-0.256
1575	ENSMUSG00000037364.12	Srrt	chr5	-	137301317	137302314	137302125	137302314	137300243	137300413	1575	208156	821615	469366	330388	198	99	0	0	0.112,0.113	0.415,0.32	-0.255
3709	ENSMUSG00000090626.9	Tex9	chr9	-	72479923	72480775	72480596	72480775	72478339	72478422	3709	8,7	80,43	40,45	59,37	198	99	2.08012e-10	5.1638e-08	0.048,0.075	0.253,0.378	-0.254
13082	ENSMUSG00000025410.10	Dctn2	chr10	+	127277502	127278000	127277502	127277772	127278119	127278222	13082	11,12	2,3	45,19	0,1	198	99	0.000616075	0.0214167	0.733,0.667	1.0,0.905	-0.253
515	ENSMUSG00000004561.14	Mettl17	chr14	+	51889146	51889397	51889146	51889217	51889527	51889635	515	63,61	195156	113104	65101	198	99	5.31437e-10	1.21605e-07	0.139,0.164	0.465,0.34	-0.251
3400	ENSMUSG00000032637.15	Atxn2l	chr7	-	126492757	126493001	126492811	126493001	126492443	126492608	3400	29,26	18,13	40,20	6,4	153	99	0.00138684	0.0391494	0.51,0.564	0.812,0.764	-0.251
18355	ENSMUSG00000061859.17	Patj	chr4	+	98395790	98395924	98395790	98395865	98405378	98405434	18355	75,71	57,24	42,26	5,5	158	99	0.00113475	0.0340075	0.452,0.65	0.84,0.765	-0.251
1268	ENSMUSG00000048677.9	Tpcn2	chr7	-	145260026	145260138	145260088	145260138	145258514	145258614	1268	1,1	16,24	8,5	8,14	161	99	4.77044e-05	0.00274512	0.037,0.025	0.381,0.18	-0.249
1812	ENSMUSG00000010608.15	Rbm25	chr12	+	83639127	83639375	83639127	83639191	83642401	83642519	1812	13,15	41,37	24,18	20,12	198	99	7.35844e-05	0.00396459	0.137,0.169	0.375,0.429	-0.249
2201	ENSMUSG00000022961.18	Son	chr16	+	91671348	91674141	91671348	91671465	91674694	91674774	2201	40,40	35,23	68,45	15,13	198	99	0.000267753	0.0111755	0.364,0.465	0.694,0.634	-0.249
16146	ENSMUSG00000063245.11	Zfp993	chr4	+	146644458	146644527	146644458	146644504	146654898	146654956	16146	0,3	16,18	9,3	10,10	122	99	0.00163434	0.0440134	0.0,0.119	0.422,0.196	-0.249
21942	ENSMUSG00000078812.10	Eif5a	chr11	-	69920805	69921190	69921177	69921190	69919150	69919336	21942	13,18	2,5	32,19	0,1	198	99	0.000198799	0.00878917	0.765,0.643	1.0,0.905	-0.249
39761	ENSMUSG00000001062.18	Vps9d1	chr8	-	123248557	123248676	123248613	123248676	123248153	123248206	39761	2,0	35,44	13,10	30,14	155	99	6.49038e-09	1.11223e-06	0.035,0.0	0.217,0.313	-0.247
3234	ENSMUSG00000029267.17	Mtf2	chr5	+	108069161	108069523	108069161	108069363	108073306	108073454	3234	88,69	51,47	137124	28,32	198	99	2.50009e-06	0.000221031	0.463,0.423	0.71,0.66	-0.242
10650	ENSMUSG00000025137.15	Pcyt2	chr11	-	120612845	120613083	120613029	120613083	120612385	120612601	10650	55,61	112,81	238139	107,93	198	99	2.30183e-08	3.3662e-06	0.197,0.274	0.527,0.428	-0.242
25771	ENSMUSG00000009995.17	Taz	chrX	+	74288177	74288339	74288177	74288219	74288450	74288718	25771	71,38	98,92	176136	77110	198	99	1.1072e-05	0.000783094	0.266,0.171	0.533,0.382	-0.239
29233	ENSMUSG00000032126.16	Hmbs	chr9	-	44337424	44337690	44337651	44337690	44337117	44337171	29233	10,18	1,4	27,25	0,0	198	99	0.000402078	0.0153492	0.833,0.692	1.0,1.0	-0.238
2316	ENSMUSG00000028797.20	Tmem234	chr4	+	129600982	129601314	129600982	129601243	129601869	129601961	2316	11,12	90,69	50,35	51,55	170	99	4.40752e-10	1.02666e-07	0.066,0.092	0.363,0.27	-0.237
3818	ENSMUSG00000032480.17	Dhx30	chr9	-	110115035	110115582	110115490	110115582	110109025	110109121	3818	19,10	3,2	37,33	1,0	198	99	0.000947003	0.0296951	0.76,0.714	0.949,1.0	-0.237
585	ENSMUSG00000097333.7	Zfp87	chr13	-	67521147	67521319	67521192	67521319	67520625	67520721	585	11,26	108,98	66,59	83,80	144	99	4.89972e-10	1.12781e-07	0.065,0.154	0.353,0.336	-0.235
33020	ENSMUSG00000049600.8	Zbtb45	chr7	-	13009417	13009800	13009691	13009800	13008248	13008329	33020	31,24	4,6	28,20	1,0	198	99	0.000159221	0.00739104	0.795,0.667	0.933,1.0	-0.235
14966	ENSMUSG00000041936.18	Agrn	chr4	-	156173295	156173587	156173542	156173587	156173002	156173130	14966	42,27	576473	128,66	133127	198	99	0	0	0.035,0.028	0.325,0.206	-0.234
5310	ENSMUSG00000042834.15	Nrep	chr18	-	33463741	33464029	33463852	33464029	33463377	33463419	5310	1,0	4,6	2,6	4,5	198	99	0.000663162	0.0226687	0.111,0.0	0.2,0.375	-0.232
31421	ENSMUSG00000029165.17	Agbl5	chr5	+	30904709	30905155	30904709	30904815	30905630	30905761	31421	35,38	7,8	15,27	1,0	198	99	7.944e-05	0.00425041	0.714,0.704	0.882,1.0	-0.232
34316	ENSMUSG00000030061.16	Uba3	chr6	-	97204914	97205154	97205102	97205154	97203473	97203594	34316	6,5	28,21	23,15	23,15	198	99	7.16005e-05	0.0038846	0.097,0.106	0.333,0.333	-0.232
21602	ENSMUSG00000030924.16	Rexo5	chr7	+	119827302	119827567	119827302	119827376	119828091	119828206	21602	1,0	11,3	3,5	3,12	198	99	0.000952808	0.0297944	0.043,0.0	0.333,0.172	-0.231
3124	ENSMUSG00000002028.13	Kmt2a	chr9	-	44817604	44817786	44817705	44817786	44816594	44816659	3124	2,0	28,33	9,4	12,7	198	99	6.16241e-07	6.79489e-05	0.034,0.0	0.273,0.222	-0.23
31233	ENSMUSG00000018362.14	Kpna2	chr11	-	106998375	106998779	106998745	106998779	106997237	106997335	31233	42,32	9,8	76,86	0,9	198	99	0.00123616	0.0361494	0.7,0.667	1.0,0.827	-0.23
39764	ENSMUSG00000001062.18	Vps9d1	chr8	-	123248591	123248676	123248613	123248676	123248153	123248206	39764	1,1	35,44	8,8	30,14	121	99	1.56954e-06	0.000148192	0.023,0.018	0.179,0.319	-0.229
8383	ENSMUSG00000022185.19	Acin1	chr14	-	54653213	54653566	54653534	54653566	54651716	54651858	8383	289237	150128	346304	64,66	198	99	3.53344e-10	8.38114e-08	0.491,0.481	0.73,0.697	-0.228
12388	ENSMUSG00000007850.16	Hnrnph1	chr11	+	50379820	50380281	50379820	50379964	50382536	50382715	12388	266274	95124	935679	97121	198	99	3.5537e-11	1.10591e-08	0.583,0.525	0.828,0.737	-0.228
21134	ENSMUSG00000039801.7	Cplane1	chr15	+	8178336	8178448	8178336	8178443	8179757	8179914	21134	3,5	121106	13,8	23,37	104	99	3.81106e-07	4.3861e-05	0.023,0.043	0.35,0.171	-0.228
7793	ENSMUSG00000023067.14	Cdkn1a	chr17	+	29093768	29094267	29093768	29093861	29098396	29098837	7793	79,65	12881160	265133	238369	198	99	0	0	0.03,0.027	0.358,0.153	-0.227
21936	ENSMUSG00000078812.10	Eif5a	chr11	-	69920780	69921190	69921177	69921190	69919150	69919336	21936	14,23	2,5	41,26	0,1	198	99	0.00020081	0.00886539	0.778,0.697	1.0,0.929	-0.227
22795	ENSMUSG00000044037.15	Als2cl	chr9	+	110883854	110883931	110883854	110883927	110884017	110884146	22795	11,8	6,2	8,3	1,0	103	99	0.0016007	0.0434522	0.638,0.794	0.885,1.0	-0.227
2089	ENSMUSG00000026811.18	St6galnac6	chr2	+	32608041	32608225	32608041	32608096	32609225	32609316	2089	35,25	95,74	55,52	48,41	198	99	5.83689e-08	8.02314e-06	0.156,0.145	0.364,0.388	-0.226
38856	ENSMUSG00000032525.15	Nktr	chr9	+	121752346	121752827	121752346	121752463	121752990	121753092	38856	10,6	109119	37,25	35,59	198	99	3.69557e-11	1.14093e-08	0.044,0.025	0.346,0.175	-0.226
29550	ENSMUSG00000033970.15	Rfc3	chr5	-	151650723	151651195	151650822	151651195	151649871	151650009	29550	0,0	5,2	4,2	6,4	198	99	0.000818715	0.0266288	0.0,0.0	0.25,0.2	-0.225
345	ENSMUSG00000022702.16	Hira	chr16	+	18895902	18896046	18895902	18895927	18896453	18896564	345	51,42	14,7	61,28	1,2	198	99	8.64654e-05	0.00453303	0.646,0.75	0.968,0.875	-0.224
1836	ENSMUSG00000026107.11	Nabp1	chr1	-	51477721	51478399	51477824	51478399	51477477	51477616	1836	28,15	143128	122,86	110140	198	99	9.5024e-13	4.40052e-10	0.089,0.055	0.357,0.235	-0.224
9660	ENSMUSG00000021171.8	Esyt2	chr12	+	116369991	116370288	116369991	116370061	116389433	116391050	9660	21,15	8,1	18,16	0,1	198	99	0.000666152	0.0226884	0.568,0.882	1.0,0.889	-0.22
16157	ENSMUSG00000020372.15	Rack1	chr11	+	48801632	48801911	48801632	48801776	48802272	48802667	16157	0,1	4,2	2,7	2,8	198	99	0.00134975	0.0383143	0.0,0.2	0.333,0.304	-0.218
39763	ENSMUSG00000001062.18	Vps9d1	chr8	-	123248586	123248676	123248613	123248676	123248153	123248206	39763	2,3	35,44	9,9	30,14	126	99	0.000112241	0.00560698	0.043,0.051	0.191,0.336	-0.217
3266	ENSMUSG00000003190.12	Bcl2l12	chr7	-	44993810	44994271	44994179	44994271	44992743	44993031	3266	72,69	195160	182112	109125	198	99	2.8428e-07	3.37149e-05	0.156,0.177	0.455,0.309	-0.216
37405	ENSMUSG00000032737.13	Inppl1	chr7	-	101837888	101838229	101838152	101838229	101836570	101836951	37405	25,29	9,5	6,9	1,0	198	99	0.00152871	0.0421749	0.581,0.744	0.75,1.0	-0.213
42326	ENSMUSG00000020088.10	Sar1a	chr10	+	61683874	61684331	61683874	61684187	61684879	61684953	42326	27,20	72,79	44,44	32,54	198	99	5.20831e-06	0.000407652	0.158,0.112	0.407,0.289	-0.213
958	ENSMUSG00000022974.12	Paxbp1	chr16	-	91030415	91030556	91030432	91030556	91027229	91027329	958	113102	147194	186151	86139	116	99	0.000298774	0.0121319	0.396,0.31	0.649,0.481	-0.212
30940	ENSMUSG00000008129.14	4930432K21Rik	chr8	+	84148837	84149176	84148837	84148885	84159444	84159607	30940	0,1	11,9	1,5	5,4	198	99	0.00140321	0.0394495	0.0,0.053	0.091,0.385	-0.211
4479	ENSMUSG00000049164.7	Zfp518a	chr19	+	40894704	40895070	40894704	40894786	40897083	40897165	4479	17,18	4,1	7,8	0,0	198	99	0.000882451	0.0282376	0.68,0.9	1.0,1.0	-0.21
33122	ENSMUSG00000045983.16	Eif4g1	chr16	+	20673570	20673961	20673570	20673655	20675343	20675520	33122	44,27	3,8	60,47	1,1	198	99	0.000416596	0.0158103	0.88,0.628	0.968,0.959	-0.21
25779	ENSMUSG00000009995.17	Taz	chrX	+	74288303	74288714	74288303	74288513	74289298	74289348	25779	22,21	9,0	61,58	1,0	198	99	0.000493286	0.0181685	0.55,1.0	0.968,1.0	-0.209
33298	ENSMUSG00000042489.15	Clspn	chr4	+	126561757	126561952	126561757	126561904	126563906	126563984	33298	22,17	4,7	7,6	1,0	147	99	0.00188796	0.049203	0.787,0.621	0.825,1.0	-0.209
70	ENSMUSG00000025188.15	Hps1	chr19	-	42766685	42766833	42766709	42766833	42765912	42765982	70	14,21	5,2	9,19	0,0	123	99	0.000182833	0.0082508	0.693,0.894	1.0,1.0	-0.207
2592	ENSMUSG00000014763.8	Fam120b	chr17	+	15401744	15404397	15401744	15403129	15405754	15405935	2592	151114	188186	114131	51,96	198	99	1.15896e-05	0.000810858	0.287,0.235	0.528,0.406	-0.206
2974	ENSMUSG00000068329.12	Htra2	chr6	-	83053000	83053070	83053037	83053070	83052697	83052726	2974	54,39	35,25	103,71	21,23	136	99	0.000375604	0.0145818	0.529,0.532	0.781,0.692	-0.206
12403	ENSMUSG00000007850.16	Hnrnph1	chr11	+	50383679	50383929	50383679	50383769	50384643	50384736	12403	85,55	290213	259160	210214	198	99	6.51501e-12	2.39089e-09	0.128,0.114	0.381,0.272	-0.206
16909	ENSMUSG00000028468.15	Rgp1	chr4	+	43579374	43579557	43579374	43579424	43579886	43580023	16909	114100	11,19	74,60	1,0	198	99	1.48816e-07	1.88594e-05	0.838,0.725	0.974,1.0	-0.206
1410	ENSMUSG00000116138.1	C030006K11Rik	chr15	-	76723376	76723840	76723654	76723840	76723170	76723219	1410	45,56	103,96	40,32	23,30	198	99	0.00018938	0.0084097	0.179,0.226	0.465,0.348	-0.204
36748	ENSMUSG00000022721.19	Trmt2a	chr16	+	18250771	18251270	18250771	18251001	18251548	18251660	36748	36,15	4,3	86,52	1,1	198	99	0.00100073	0.0309201	0.818,0.714	0.977,0.963	-0.204
2402	ENSMUSG00000038860.15	Garnl3	chr2	-	33104848	33105023	33104852	33105023	33085874	33085944	2402	0,0	7,18	1,5	11,10	103	99	0.00023158	0.00999828	0.0,0.0	0.08,0.325	-0.203
14179	ENSMUSG00000035851.14	Ythdc1	chr5	+	86827954	86828409	86827954	86828121	86830553	86830636	14179	175179	460342	212142	129150	198	99	6.04418e-08	8.24977e-06	0.16,0.207	0.451,0.321	-0.203
29469	ENSMUSG00000062646.12	Ganc	chr2	+	120404209	120404644	120404209	120404290	120406265	120406328	29469	11,16	5,1	9,29	1,0	198	99	0.00154346	0.0424016	0.524,0.889	0.818,1.0	-0.203
1100	ENSMUSG00000062822.8	4833420G17Rik	chr13	+	119473832	119474194	119473832	119473956	119474832	119474924	1100	28,39	362311	155,90	165207	198	99	1.11022e-16	1.07969e-13	0.037,0.059	0.32,0.179	-0.202
3366	ENSMUSG00000042404.16	Dennd4b	chr3	+	90270054	90270128	90270054	90270121	90270212	90270271	3366	2,0	22,35	3,4	12,9	106	99	0.00104028	0.0318386	0.078,0.0	0.189,0.293	-0.202
28737	ENSMUSG00000005774.12	Rfx5	chr3	+	94954200	94954639	94954200	94954251	94955014	94955146	28737	2,6	102101	50,8	45,43	198	99	1.97876e-08	2.97195e-06	0.01,0.029	0.357,0.085	-0.202
25199	ENSMUSG00000021905.14	Dph3	chr14	-	32085496	32085692	32085551	32085692	32084906	32084981	25199	0,0	6,2	1,5	4,9	154	99	0.000300696	0.0121718	0.0,0.0	0.138,0.263	-0.201
9659	ENSMUSG00000021171.8	Esyt2	chr12	+	116369991	116370227	116369991	116370061	116389433	116391050	9659	24,18	8,1	22,18	0,1	198	99	0.000665908	0.0226884	0.6,0.9	1.0,0.9	-0.2
36419	ENSMUSG00000027326.13	Knl1	chr2	+	119047118	119047237	119047118	119047223	119057280	119057331	36419	0,0	38,28	2,4	13,9	113	99	0.000259024	0.0108813	0.0,0.0	0.119,0.28	-0.2
40318	ENSMUSG00000025899.14	Alkbh8	chr9	+	3335139	3335612	3335139	3335250	3338455	3338591	40318	0,0	10,7	2,4	4,8	198	99	0.000628503	0.021771	0.0,0.0	0.2,0.2	-0.2
34196	ENSMUSG00000030083.11	Abtb1	chr6	-	88839045	88839262	88839184	88839262	88838844	88838961	34196	7,10	53,54	38,13	30,36	198	99	0.000176997	0.00805406	0.062,0.085	0.388,0.153	-0.197
41371	ENSMUSG00000004980.16	Hnrnpa2b1	chr6	-	51463216	51463493	51463410	51463493	51461919	51462055	41371	281269	123109	770556	102126	198	99	2.20419e-07	2.67112e-05	0.533,0.552	0.791,0.688	-0.197
5266	ENSMUSG00000117694.1	Gm28285	chr18	+	35557336	35557396	35557336	35557369	35571842	35572285	5266	129130	144136	230174	86109	126	99	3.79228e-05	0.00228661	0.413,0.429	0.678,0.556	-0.196
5267	ENSMUSG00000117694.1	Gm28285	chr18	+	35557336	35557422	35557336	35557369	35571842	35572285	5267	275241	144136	456398	86109	152	99	1.03454e-08	1.63591e-06	0.554,0.536	0.775,0.704	-0.195
362	ENSMUSG00000022545.13	Ercc4	chr16	+	13130133	13131022	13130133	13130734	13132857	13132950	362	8,6	59,39	11,12	12,23	198	99	0.00016531	0.00763723	0.063,0.071	0.314,0.207	-0.194
36740	ENSMUSG00000022721.19	Trmt2a	chr16	+	18249061	18249298	18249061	18249234	18249485	18250033	36740	6,13	0,5	11,7	0,0	163	99	0.00137784	0.0389941	1.0,0.612	1.0,1.0	-0.194
241	ENSMUSG00000073434.12	Wdr90	chr17	-	25860654	25860817	25860708	25860817	25860371	25860542	241	14,10	66,45	23,13	27,22	153	99	0.000201243	0.00886563	0.121,0.126	0.355,0.277	-0.193
1468	ENSMUSG00000073471.3	Rsph3a	chr17	+	7952548	7952636	7952548	7952633	7970146	7970288	1468	17,23	5,4	10,11	0,0	102	99	0.000128385	0.00621942	0.767,0.848	1.0,1.0	-0.193
2570	ENSMUSG00000038437.11	Mllt6	chr11	+	97672456	97672682	97672456	97672592	97673459	97674071	2570	37,27	312274	36,42	62,63	189	99	2.10942e-15	1.74588e-12	0.058,0.049	0.233,0.259	-0.193
3579	ENSMUSG00000005150.16	Wdr83	chr8	-	85080053	85080225	85080119	85080225	85079788	85079837	3579	45,39	195139	61,62	69,85	165	99	4.27577e-09	7.66485e-07	0.122,0.144	0.347,0.304	-0.193
3580	ENSMUSG00000005150.16	Wdr83	chr8	-	85080060	85080225	85080119	85080225	85079788	85079837	3580	44,32	195139	55,59	69,85	158	99	4.22623e-09	7.61112e-07	0.124,0.126	0.333,0.303	-0.193
36155	ENSMUSG00000058239.13	Usf2	chr7	-	30955880	30956238	30956148	30956238	30955289	30955440	36155	28,22	45,28	56,33	34,20	198	99	0.000945897	0.0296951	0.237,0.282	0.452,0.452	-0.193
40912	ENSMUSG00000000167.14	Pih1d2	chr9	+	50618445	50618833	50618445	50618649	50619754	50619878	40912	1,4	20,11	13,10	15,14	198	99	0.000871867	0.0280063	0.024,0.154	0.302,0.263	-0.193
29470	ENSMUSG00000062646.12	Ganc	chr2	+	120404223	120405408	120404223	120404290	120406265	120406328	29470	12,16	5,1	9,29	1,0	198	99	0.00157907	0.0431361	0.545,0.889	0.818,1.0	-0.192
33011	ENSMUSG00000032827.15	Ppp1r9a	chr6	+	5143227	5143495	5143227	5143467	5154008	5154318	33011	20,18	3,4	7,3	0,0	127	99	0.000586407	0.0206437	0.839,0.778	1.0,1.0	-0.192
3353	ENSMUSG00000047767.17	Atg16l2	chr7	-	101291714	101291999	101291878	101291999	101291486	101291592	3353	19,21	141138	37,43	57,58	198	99	2.57713e-11	8.28515e-09	0.063,0.071	0.245,0.27	-0.191
15486	ENSMUSG00000003534.17	Ddr1	chr17	-	35701652	35702044	35702003	35702044	35693787	35693917	15486	6,9	84118	13,5	16,13	198	99	2.77933e-06	0.000242957	0.034,0.037	0.289,0.161	-0.189
25313	ENSMUSG00000024163.17	Mapk8ip3	chr17	-	24917994	24918139	24918087	24918139	24916503	24916629	25313	90,87	28,20	104,83	12,6	192	99	0.000363628	0.014202	0.624,0.692	0.817,0.877	-0.189
886	ENSMUSG00000001034.17	Mapk7	chr11	-	61493523	61493954	61493646	61493954	61492903	61493069	886	70,64	95112	67,47	39,35	198	99	3.7973e-05	0.00228661	0.269,0.222	0.462,0.402	-0.187
19178	ENSMUSG00000035545.13	Leng8	chr7	+	4142833	4143309	4142833	4143037	4143418	4143697	19178	46,41	85,61	117,85	56,87	198	99	0.00151559	0.0419024	0.213,0.252	0.511,0.328	-0.187
12964	ENSMUSG00000090841.2	Myl6	chr10	-	128491719	128492155	128492058	128492155	128491289	128491347	12964	192154	215167	355244	129169	198	99	0.000289943	0.011861	0.309,0.316	0.579,0.419	-0.186
13990	ENSMUSG00000049606.16	Zfp644	chr5	-	106695136	106695699	106695642	106695699	106638279	106638635	13990	61,56	8,12	77,74	0,6	198	99	0.000959974	0.0299483	0.792,0.7	1.0,0.86	-0.184
37402	ENSMUSG00000032737.13	Inppl1	chr7	-	101837510	101837803	101837720	101837803	101836570	101836951	37402	148126	262209	108,73	69,59	198	99	2.2465e-07	2.71394e-05	0.22,0.232	0.439,0.382	-0.184
7307	ENSMUSG00000062906.12	Hdac10	chr15	-	89126562	89126706	89126629	89126706	89126377	89126437	7307	0,0	8,11	6,3	10,16	166	99	0.000149999	0.00706413	0.0,0.0	0.264,0.101	-0.182
13208	ENSMUSG00000020184.15	Mdm2	chr10	-	117709653	117710117	117709945	117710117	117705154	117705229	13208	78,81	229242	174112	141153	198	99	3.85555e-08	5.41448e-06	0.146,0.143	0.382,0.268	-0.181
1057	ENSMUSG00000035851.14	Ythdc1	chr5	+	86827954	86829479	86827954	86828121	86830553	86830636	1057	256260	460342	249170	129150	198	99	9.97307e-06	0.000719763	0.218,0.275	0.491,0.362	-0.18
2146	ENSMUSG00000029062.14	Cdk11b	chr4	+	155625530	155625773	155625530	155625654	155626773	155626889	2146	96,87	254215	87,86	80,85	198	99	7.90218e-09	1.31365e-06	0.159,0.168	0.352,0.336	-0.18
4741	ENSMUSG00000024949.17	Sf1	chr19	+	6365663	6365955	6365663	6365792	6368363	6368467	4741	58,53	12101034	203125	325305	198	99	0	0	0.023,0.025	0.238,0.17	-0.18
21343	ENSMUSG00000031591.14	Asah1	chr8	-	41343405	41343853	41343729	41343853	41342884	41342941	21343	0,0	10,8	3,5	6,13	198	99	0.000257681	0.0108365	0.0,0.0	0.2,0.161	-0.18
28732	ENSMUSG00000005774.12	Rfx5	chr3	+	94954107	94954551	94954107	94954251	94955014	94955146	28732	15,22	102101	59,13	45,43	198	99	0.000671631	0.0227582	0.068,0.098	0.396,0.131	-0.18
30663	ENSMUSG00000078570.10	1110065P20Rik	chr4	-	124850060	124850330	124850192	124850330	124849545	124849962	30663	0,0	8,1	4,5	8,13	198	99	0.000246783	0.0105609	0.0,0.0	0.2,0.161	-0.18
31794	ENSMUSG00000066952.11	Myo1h	chr5	+	114357405	114357568	114357405	114357439	114357918	114358078	31794	33,37	6,3	41,53	1,0	198	99	0.000112284	0.00560698	0.733,0.86	0.953,1.0	-0.18
35480	ENSMUSG00000041596.12	Nlrp5-ps	chr7	-	14603139	14603190	14603148	14603190	14598274	14598451	35480	12,25	2,6	14,12	0,0	108	99	0.000145101	0.00685005	0.846,0.793	1.0,1.0	-0.18
2885	ENSMUSG00000040690.15	Col16a1	chr4	+	130081434	130081521	130081434	130081479	130083121	130083175	2885	13,15	243263	9,15	27,33	141	99	1.78675e-08	2.69397e-06	0.036,0.039	0.19,0.242	-0.178
16732	ENSMUSG00000042625.16	Safb2	chr17	-	56570933	56571319	56571209	56571319	56568990	56569022	16732	44,27	223203	95,44	116,79	198	99	3.02536e-13	1.56915e-10	0.09,0.062	0.291,0.218	-0.178
2345	ENSMUSG00000027829.15	Ccnl1	chr3	-	65950024	65950226	65950212	65950226	65948690	65948790	2345	95,87	15,20	207183	8,14	198	99	4.22553e-05	0.00250187	0.76,0.685	0.928,0.867	-0.175
3602	ENSMUSG00000036672.5	Cenpt	chr8	-	105846164	105846391	105846315	105846391	105845259	105845436	3602	73,58	276243	80,58	82,89	198	99	1.00325e-09	2.16813e-07	0.117,0.107	0.328,0.246	-0.175
12124	ENSMUSG00000001034.17	Mapk7	chr11	-	61493437	61493881	61493646	61493881	61492903	61493069	12124	58,56	95112	58,39	39,35	198	99	8.29828e-05	0.00439188	0.234,0.2	0.426,0.358	-0.175
24320	ENSMUSG00000041935.10	AW549877	chr15	-	3991988	3992464	3992357	3992464	3991717	3991864	24320	25,18	185142	77,66	102134	198	99	4.78062e-13	2.40688e-10	0.063,0.06	0.274,0.198	-0.175
26765	ENSMUSG00000063229.15	Ldha	chr7	+	46847241	46847496	46847241	46847388	46847595	46847745	26765	156145	53,52	236166	32,29	198	99	3.45445e-05	0.00211286	0.595,0.582	0.787,0.741	-0.175
23029	ENSMUSG00000029283.17	Cdc7	chr5	+	106974600	106975010	106974600	106974696	106975484	106975660	23029	46,19	152175	145101	173164	198	99	5.24636e-12	1.98139e-09	0.131,0.051	0.295,0.235	-0.174
23027	ENSMUSG00000029283.17	Cdc7	chr5	+	106974600	106974974	106974600	106974696	106975484	106975660	23027	46,18	152175	143101	173164	198	99	6.05715e-12	2.24403e-09	0.131,0.049	0.292,0.235	-0.173
20516	ENSMUSG00000042626.13	Shc1	chr3	+	89421641	89421748	89421641	89421721	89422177	89422345	20516	12,17	0,7	6,11	0,0	126	99	0.000561649	0.0199709	1.0,0.656	1.0,1.0	-0.172
40048	ENSMUSG00000031837.14	Necab2	chr8	+	119450081	119450322	119450081	119450106	119452081	119452190	40048	2,0	32,41	5,5	7,20	198	99	6.13779e-05	0.00338187	0.03,0.0	0.263,0.111	-0.172
2742	ENSMUSG00000024002.18	Brd4	chr17	-	32252996	32253200	32253040	32253200	32229416	32229735	2742	0,2	33,26	7,1	15,4	143	99	0.000257542	0.0108365	0.0,0.051	0.244,0.148	-0.171
22229	ENSMUSG00000036555.14	Iqce	chr5	-	140701793	140702265	140702181	140702265	140699684	140699732	22229	0,5	82,91	20,30	62,50	198	99	4.06009e-13	2.07812e-10	0.0,0.027	0.139,0.231	-0.171
23028	ENSMUSG00000029283.17	Cdc7	chr5	+	106974600	106974983	106974600	106974696	106975484	106975660	23028	46,18	152175	140100	173164	198	99	1.15511e-11	4.04809e-09	0.131,0.049	0.288,0.234	-0.171
3764	ENSMUSG00000090112.8	Shprh	chr10	+	11171872	11172001	11171872	11171994	11178733	11178822	3764	5,2	168135	16,8	47,46	106	99	5.78091e-09	1.00992e-06	0.027,0.014	0.241,0.14	-0.17
20711	ENSMUSG00000086328.1	2700033N17Rik	chr2	-	116066954	116067444	116067048	116067444	116066217	116066618	20711	0,0	5,5	0,6	2,6	193	99	0.000972403	0.0302128	0.0,0.0	0.0,0.339	-0.17
37129	ENSMUSG00000036580.15	Spg20	chr3	+	55112107	55112530	55112107	55112217	55116983	55117795	37129	23,34	392341	44,39	91,69	198	99	0	0	0.029,0.047	0.195,0.22	-0.17
40717	ENSMUSG00000063524.13	Eno1	chr4	+	150241766	150242171	150241766	150241825	150244004	150244074	40717	159154	26,13	339238	3,4	198	99	1.26699e-10	3.37575e-08	0.754,0.856	0.983,0.967	-0.17
15109	ENSMUSG00000049580.12	Tsku	chr7	-	98360975	98361288	98361241	98361288	98350867	98353130	15109	7,12	157144	22,19	35,50	198	99	5.77502e-11	1.71487e-08	0.022,0.04	0.239,0.16	-0.169
15111	ENSMUSG00000049580.12	Tsku	chr7	-	98360997	98361288	98361241	98361288	98350867	98353130	15111	7,12	157144	22,19	35,50	198	99	5.77502e-11	1.71487e-08	0.022,0.04	0.239,0.16	-0.169
17828	ENSMUSG00000029247.17	Paics	chr5	+	76954440	76954561	76954440	76954557	76956545	76956846	17828	0,0	15,17	2,4	19,12	103	99	0.000767107	0.025353	0.0,0.0	0.092,0.243	-0.167
6039	ENSMUSG00000024188.16	Luc7l	chr17	+	26279934	26280236	26279934	26280128	26281624	26285504	6039	185139	177161	199188	89115	198	99	1.8118e-05	0.00120067	0.343,0.302	0.528,0.45	-0.166
14732	ENSMUSG00000028959.14	Fastk	chr5	-	24441161	24441465	24441335	24441465	24438440	24439918	14732	33,30	3,4	101,60	0,1	198	99	0.000162983	0.00753867	0.846,0.789	1.0,0.968	-0.166
24169	ENSMUSG00000026135.17	Zfp142	chr1	-	74587367	74587656	74587563	74587656	74585383	74585697	24169	8,7	66,57	32,9	32,35	198	99	0.000172111	0.00789458	0.057,0.058	0.333,0.114	-0.166
884	ENSMUSG00000001034.17	Mapk7	chr11	-	61493505	61493954	61493646	61493954	61492903	61493069	884	64,63	95112	59,41	39,35	198	99	0.000248281	0.0105669	0.252,0.22	0.431,0.369	-0.164
28085	ENSMUSG00000030695.16	Aldoa	chr7	-	126798675	126799141	126799044	126799141	126797973	126798126	28085	580464	13391172	620549	479717	198	99	3.0214e-08	4.337e-06	0.178,0.165	0.393,0.277	-0.164
315	ENSMUSG00000034206.15	Polq	chr16	+	37013106	37013448	37013106	37013286	37015078	37015209	315	2,2	57,62	15,10	34,23	198	99	1.0528e-08	1.65805e-06	0.017,0.016	0.181,0.179	-0.163
39602	ENSMUSG00000052926.16	Rnaseh2a	chr8	-	84969273	84969767	84969721	84969767	84967662	84967868	39602	9,6	51,61	26,25	47,40	198	99	2.1278e-06	0.000191158	0.081,0.047	0.217,0.238	-0.163
23893	ENSMUSG00000005087.17	Cd44	chr2	-	102832167	102832572	102832482	102832572	102831329	102831536	23893	1,1	31,39	6,3	9,13	198	99	8.79132e-05	0.00459037	0.016,0.013	0.25,0.103	-0.162
13673	ENSMUSG00000047417.18	Rexo1	chr10	-	80547527	80547921	80547772	80547921	80546301	80546465	13673	8,4	164161	25,21	57,48	198	99	5.55112e-15	4.23409e-12	0.024,0.012	0.18,0.179	-0.161
61	ENSMUSG00000024985.19	Tcf7l2	chr19	+	55910578	55910681	55910578	55910669	55912558	55912645	61	30,35	7,4	15,9	0,0	111	99	0.000183591	0.00826582	0.793,0.886	1.0,1.0	-0.16
12397	ENSMUSG00000007850.16	Hnrnph1	chr11	+	50383679	50383881	50383679	50383763	50384643	50384736	12397	62,45	11,5	154110	2,6	198	99	0.000320879	0.0128286	0.738,0.818	0.975,0.902	-0.16
12723	ENSMUSG00000020473.13	Aebp1	chr11	+	5866872	5867109	5866872	5867000	5867639	5867749	12723	38,43	4,6	59,50	1,1	198	99	0.000904602	0.0287492	0.826,0.782	0.967,0.962	-0.16
31589	ENSMUSG00000079487.11	Med12	chrX	+	101283667	101284035	101283667	101283799	101284145	101284373	31589	5,7	139,83	12,9	18,31	198	99	7.85035e-07	8.25348e-05	0.018,0.04	0.25,0.127	-0.16
20870	ENSMUSG00000045411.16	2410002F23Rik	chr7	+	44247230	44247538	44247230	44247416	44247909	44248059	20870	47,34	128104	98,70	102,86	198	99	8.89961e-07	9.23186e-05	0.155,0.14	0.325,0.289	-0.159
30943	ENSMUSG00000027624.19	Epb41l1	chr2	+	156483464	156483698	156483464	156483666	156493903	156494094	30943	28,22	3,4	11,7	0,0	131	99	0.00085512	0.0276019	0.876,0.806	1.0,1.0	-0.159
29471	ENSMUSG00000062646.12	Ganc	chr2	+	120404972	120405408	120404972	120405059	120406265	120406328	29471	1,1	30,22	10,3	11,35	198	99	0.000532824	0.019245	0.016,0.022	0.312,0.041	-0.158
22231	ENSMUSG00000036555.14	Iqce	chr5	-	140701817	140702265	140702181	140702265	140699684	140699732	22231	2,5	82,91	18,29	62,50	198	99	1.03103e-10	2.82443e-08	0.012,0.027	0.127,0.225	-0.157
25630	ENSMUSG00000054387.13	Mdm4	chr1	-	133008982	133009151	133009136	133009151	133003790	133003890	25630	6,11	133109	42,17	58,64	198	99	5.59165e-09	9.84232e-07	0.022,0.048	0.266,0.117	-0.157
318	ENSMUSG00000022906.15	Parp9	chr16	+	35943368	35943510	35943368	35943402	35947500	35948354	318	0,0	4,8	0,10	15,11	198	99	0.000933111	0.0294866	0.0,0.0	0.0,0.312	-0.156
381	ENSMUSG00000023007.15	Prpf40b	chr15	+	99315479	99315581	99315479	99315569	99315722	99315900	381	11,6	78,73	15,19	48,45	111	99	0.000276022	0.0114226	0.112,0.068	0.218,0.274	-0.156
30400	ENSMUSG00000001248.15	Gramd1a	chr7	-	31135525	31135739	31135557	31135739	31134413	31134517	30400	37,29	3,6	82,62	0,0	131	99	1.24178e-05	0.000856474	0.903,0.785	1.0,1.0	-0.156
3236	ENSMUSG00000029267.17	Mtf2	chr5	+	108069161	108069523	108069161	108069363	108080824	108081023	3236	82,70	117107	133123	79111	198	99	0.00031978	0.0127978	0.259,0.246	0.457,0.357	-0.155
4682	ENSMUSG00000071662.4	Polr2g	chr19	-	8798026	8798333	8798200	8798333	8797235	8797395	4682	0,0	6,8	6,1	8,13	198	99	0.000885723	0.0282788	0.0,0.0	0.273,0.037	-0.155
15112	ENSMUSG00000049580.12	Tsku	chr7	-	98361067	98361288	98361241	98361288	98350867	98353130	15112	9,22	157144	23,19	35,50	198	99	7.70147e-08	1.02598e-05	0.028,0.071	0.247,0.16	-0.154
33912	ENSMUSG00000061046.9	Haghl	chr17	-	25785284	25785543	25785461	25785543	25785003	25785194	33912	0,0	4,5	8,0	9,7	198	99	0.000852756	0.0275722	0.0,0.0	0.308,0.0	-0.154
926	ENSMUSG00000035455.12	Fignl1	chr11	-	11808884	11808962	11808894	11808962	11800287	11803063	926	0,2	44,25	7,4	17,32	109	99	0.000384922	0.0148694	0.0,0.068	0.272,0.102	-0.153
2259	ENSMUSG00000008305.18	Tle1	chr4	-	72169091	72169196	72169121	72169196	72145309	72145420	2259	11,18	152119	17,20	44,50	129	99	9.72072e-06	0.000704164	0.053,0.104	0.229,0.235	-0.153
36204	ENSMUSG00000038535.17	Zfp280d	chr9	+	72301683	72302006	72301683	72301766	72307950	72308068	36204	160140	21,12	150115	1,2	198	99	1.1322e-07	1.4632e-05	0.792,0.854	0.987,0.966	-0.153
1045	ENSMUSG00000058392.13	Rrp1b	chr17	+	32045928	32046229	32045928	32046011	32047673	32047731	1045	76,52	432328	106,81	157155	198	99	1.57652e-14	1.09512e-11	0.081,0.073	0.252,0.207	-0.152
7082	ENSMUSG00000000346.9	Dazap2	chr15	+	100616104	100616495	100616104	100616200	100616912	100617031	7082	42,23	4,3	34,30	0,1	198	99	0.00162715	0.0439314	0.84,0.793	1.0,0.938	-0.152
41570	ENSMUSG00000049751.6	Rpl36al	chr12	-	69183278	69183571	69183439	69183571	69182740	69183165	41570	1,0	7,5	5,4	8,13	198	99	0.00179694	0.0472942	0.067,0.0	0.238,0.133	-0.152
12386	ENSMUSG00000007850.16	Hnrnph1	chr11	+	50379820	50380281	50379820	50379964	50381458	50382137	12386	265274	31002697	935680	15551790	198	99	0	0	0.041,0.048	0.231,0.16	-0.151
13951	ENSMUSG00000033434.15	Gtpbp6	chr5	-	110107669	110108140	110107855	110108140	110107059	110107197	13951	29,24	295283	126,64	205179	198	99	0	0	0.047,0.041	0.235,0.152	-0.15
23358	ENSMUSG00000053646.13	Plxnb1	chr9	+	109103612	109103773	109103612	109103769	109104027	109104136	23358	5,3	111101	19,6	49,54	103	99	2.01641e-05	0.00131608	0.041,0.028	0.272,0.096	-0.149
3304	ENSMUSG00000025505.16	Tmem80	chr7	+	141332909	141333008	141332909	141332929	141333637	141333731	3304	79,86	16,15	93107	7,6	178	99	0.00147524	0.0409612	0.733,0.761	0.881,0.908	-0.148
35858	ENSMUSG00000013155.10	Enkd1	chr8	-	105704346	105704760	105704634	105704760	105704112	105704249	35858	44,35	9,1	82,40	0,1	198	99	0.000106548	0.00538275	0.71,0.946	1.0,0.952	-0.148
37928	ENSMUSG00000046897.17	Zfp740	chr15	+	102204985	102205305	102204985	102205086	102207770	102207920	37928	251210	161134	125128	39,51	198	99	0.000638808	0.0220494	0.438,0.439	0.616,0.557	-0.148
12402	ENSMUSG00000007850.16	Hnrnph1	chr11	+	50383679	50383881	50383679	50383769	50384643	50384736	12402	40,20	290213	135,82	210214	198	99	2.30926e-14	1.5488e-11	0.065,0.045	0.243,0.161	-0.147
14160	ENSMUSG00000020262.15	Adarb1	chr10	-	77325357	77325691	77325618	77325691	77321648	77322583	14160	80,48	9,5	103,58	0,2	198	99	4.55555e-05	0.00264007	0.816,0.828	1.0,0.935	-0.146
40541	ENSMUSG00000006235.6	Epor	chr9	-	21961690	21961866	21961694	21961866	21961483	21961605	40541	16,21	5,1	11,9	0,0	103	99	0.00109079	0.0329695	0.755,0.953	1.0,1.0	-0.146
40809	ENSMUSG00000109324.2	Prmt1	chr7	-	44983734	44983973	44983770	44983973	44983485	44983587	40809	13,13	48,52	35,36	60,58	135	99	0.00174161	0.0461188	0.166,0.155	0.3,0.313	-0.146
499	ENSMUSG00000047153.4	Khnyn	chr14	+	55893991	55894159	55893991	55894099	55894286	55894388	499	52,50	105128	67,43	61,58	159	99	0.000622534	0.0216026	0.236,0.196	0.406,0.316	-0.145
803	ENSMUSG00000020918.14	Kat2a	chr11	-	100710249	100710636	100710444	100710636	100709382	100709489	803	23,17	608605	79,62	188179	198	99	0	0	0.019,0.014	0.174,0.148	-0.144
6201	ENSMUSG00000034681.17	Rnps1	chr17	+	24414662	24415081	24414662	24414734	24418037	24418218	6201	65,78	486491	107,74	157179	198	99	6.21725e-14	3.60972e-11	0.063,0.074	0.254,0.171	-0.144
3766	ENSMUSG00000033396.13	Spg11	chr2	-	122107708	122108485	122108036	122108485	122103907	122104053	3766	25,20	125,99	21,17	38,25	198	99	0.000139818	0.00664093	0.091,0.092	0.216,0.254	-0.143
31160	ENSMUSG00000039671.18	Zmynd8	chr2	-	165883797	165884210	165884178	165884210	165875704	165875775	31160	0,1	51,46	9,1	13,12	198	99	1.66411e-05	0.00111418	0.0,0.011	0.257,0.04	-0.143
12031	ENSMUSG00000018474.17	Chd3	chr11	-	69348764	69349056	69348920	69349056	69348392	69348521	12031	5,3	80,82	13,3	19,18	198	99	2.68524e-05	0.00169847	0.03,0.018	0.255,0.077	-0.142
35402	ENSMUSG00000002028.13	Kmt2a	chr9	-	44843197	44843422	44843357	44843422	44842532	44842916	35402	0,4	44,36	10,2	16,9	198	99	0.000117991	0.00582098	0.0,0.053	0.238,0.1	-0.142
35809	ENSMUSG00000001999.15	Blvra	chr2	+	127070664	127071000	127070664	127070932	127080529	127080658	35809	0,0	6,10	0,6	2,9	167	99	0.000667749	0.0227011	0.0,0.0	0.0,0.283	-0.141
1208	ENSMUSG00000011257.19	Pabpc4	chr4	+	123288958	123289213	123288958	123289074	123290198	123290338	1208	254249	18441629	269224	477466	198	99	0	0	0.064,0.071	0.22,0.194	-0.14
12737	ENSMUSG00000020473.13	Aebp1	chr11	+	5870487	5870980	5870487	5870653	5871244	5872088	12737	34,40	3,3	34,39	0,0	198	99	0.00133021	0.0379765	0.85,0.87	1.0,1.0	-0.14
41095	ENSMUSG00000032289.15	Thsd4	chr9	-	60521794	60522046	60521865	60522046	60497097	60497205	41095	0,0	12,23	6,0	9,5	170	99	0.00108112	0.0327791	0.0,0.0	0.28,0.0	-0.14
1967	ENSMUSG00000079484.12	Phyhd1	chr2	+	30277622	30277829	30277622	30277644	30279954	30280083	1967	4,2	24,27	15,12	22,38	198	99	0.00148764	0.0412761	0.077,0.036	0.254,0.136	-0.139
31154	ENSMUSG00000039671.18	Zmynd8	chr2	-	165845743	165846235	165846020	165846235	165842782	165842877	31154	13,5	807741	48,22	91124	198	99	0	0	0.008,0.003	0.209,0.081	-0.139
26581	ENSMUSG00000033021.16	Gmppa	chr1	+	75436153	75436445	75436153	75436312	75436777	75436838	26581	21,17	215206	59,45	105135	198	99	1.71485e-12	7.25084e-10	0.047,0.04	0.219,0.143	-0.138
39274	ENSMUSG00000003573.15	Homer3	chr8	+	70291480	70291952	70291480	70291603	70292974	70294361	39274	96,94	532491	118100	165225	198	99	1.17828e-11	4.0562e-09	0.083,0.087	0.263,0.182	-0.138
1719	ENSMUSG00000055296.14	Tmem245	chr4	-	56903353	56904049	56903917	56904049	56899305	56899428	1719	3,3	174119	27,19	83,52	198	99	2.9976e-15	2.37973e-12	0.009,0.012	0.14,0.154	-0.137
13664	ENSMUSG00000035370.9	Gm49322	chr10	+	80609329	80609458	80609329	80609424	80611027	80611129	13664	21,25	0,7	3,6	0,0	133	99	0.00130729	0.0375025	1.0,0.727	1.0,1.0	-0.137
25017	ENSMUSG00000040187.15	Arntl2	chr6	+	146824907	146825276	146824907	146825228	146827215	146827324	25017	0,1	31,21	3,6	12,21	147	99	0.000181594	0.00822355	0.0,0.031	0.144,0.161	-0.137
1237	ENSMUSG00000015305.6	Sash1	chr10	-	8750652	8751485	8751138	8751485	8746115	8746190	1237	0,0	22,31	5,2	12,9	198	99	0.000244394	0.0104933	0.0,0.0	0.172,0.1	-0.136
12735	ENSMUSG00000020473.13	Aebp1	chr11	+	5870487	5870840	5870487	5870653	5871244	5872088	12735	35,42	3,3	32,39	0,0	198	99	0.00157273	0.0430241	0.854,0.875	1.0,1.0	-0.135
2810	ENSMUSG00000019518.11	Ap4m1	chr5	+	138172348	138172479	138172348	138172437	138172786	138172893	2810	30,30	321288	82,49	170204	141	99	4.89462e-09	8.73398e-07	0.062,0.068	0.253,0.144	-0.134
7998	ENSMUSG00000033004.15	Mycbp2	chr14	-	103262681	103262821	103262701	103262821	103260195	103260277	7998	4,2	135155	9,6	37,32	119	99	1.12269e-06	0.00011141	0.024,0.011	0.168,0.135	-0.134
3280	ENSMUSG00000002781.19	Tmem143	chr7	+	45897434	45897749	45897434	45897666	45899631	45899736	3280	8,12	138138	24,25	67,62	182	99	7.0411e-09	1.20131e-06	0.031,0.045	0.163,0.18	-0.133
3465	ENSMUSG00000055850.12	Rnf181	chr6	-	72361116	72361226	72361121	72361226	72360874	72361013	3465	38,45	7,5	37,19	0,0	104	99	4.98497e-05	0.00284333	0.838,0.895	1.0,1.0	-0.133
37376	ENSMUSG00000042700.16	Sipa1l1	chr12	+	82170015	82170410	82170015	82170076	82234462	82235788	37376	9,7	111,81	9,13	51,18	198	99	0.000806928	0.0263556	0.039,0.041	0.081,0.265	-0.133
38097	ENSMUSG00000070371.11	Prss36	chr7	-	127934354	127934516	127934509	127934516	127933370	127933492	38097	57,69	6,6	139,92	1,2	198	99	0.000206476	0.00905517	0.826,0.852	0.986,0.958	-0.133
662	ENSMUSG00000024948.15	Map4k2	chr19	+	6346691	6346817	6346691	6346809	6351179	6351238	662	1,1	33,26	6,5	31,22	107	99	0.0012562	0.0365426	0.027,0.034	0.152,0.174	-0.132
2368	ENSMUSG00000026634.16	Angel2	chr1	+	190940873	190941458	190940873	190941295	190942120	190942247	2368	18,17	277257	43,42	101120	198	99	6.55032e-15	4.80768e-12	0.031,0.032	0.176,0.149	-0.131
10981	ENSMUSG00000034773.16	BC030867	chr11	+	102250678	102250966	102250678	102250729	102254953	102256021	10981	6,0	63,58	9,4	16,21	198	99	0.000211013	0.00921258	0.045,0.0	0.22,0.087	-0.131
12398	ENSMUSG00000007850.16	Hnrnph1	chr11	+	50383679	50383929	50383679	50383763	50384643	50384736	12398	83,56	11,5	196137	2,6	198	99	0.000323585	0.0129102	0.79,0.848	0.98,0.919	-0.131
13096	ENSMUSG00000006731.10	B4galnt1	chr10	+	127165377	127165856	127165377	127165519	127166003	127166222	13096	29,34	168171	34,25	51,57	198	99	7.40113e-06	0.000550485	0.079,0.09	0.25,0.18	-0.131
33178	ENSMUSG00000029672.16	Fam3c	chr6	-	22355601	22356098	22355994	22356098	22355013	22355234	33178	69,52	1,10	42,27	1,0	198	99	0.00135077	0.0383143	0.972,0.722	0.955,1.0	-0.131
38095	ENSMUSG00000070371.11	Prss36	chr7	-	127934138	127934516	127934509	127934516	127933370	127933492	38095	59,71	6,6	137,96	1,2	198	99	0.000238502	0.0102744	0.831,0.855	0.986,0.96	-0.13
2729	ENSMUSG00000027881.14	Prpf38b	chr3	-	108908325	108908404	108908335	108908404	108907931	108908083	2729	48,53	385330	75,84	219230	109	99	7.76691e-08	1.03117e-05	0.102,0.127	0.237,0.249	-0.129
26805	ENSMUSG00000021327.19	Zkscan3	chr13	-	21402391	21402755	21402671	21402755	21396438	21396574	26805	8,12	78,86	20,32	78,46	198	99	9.29465e-05	0.00479525	0.049,0.065	0.114,0.258	-0.129
31173	ENSMUSG00000004565.15	Pnpla6	chr8	+	3516660	3517001	3516660	3516749	3517076	3517164	31173	10,5	88,81	17,13	34,40	198	99	1.08909e-05	0.000774505	0.054,0.03	0.2,0.14	-0.128
33184	ENSMUSG00000029672.16	Fam3c	chr6	-	22355756	22356098	22355994	22356098	22355013	22355234	33184	71,54	1,10	46,32	1,0	198	99	0.00110843	0.0333987	0.973,0.73	0.958,1.0	-0.128
10660	ENSMUSG00000060147.15	Serpinb6a	chr13	-	33918626	33918792	33918686	33918792	33918231	33918442	10660	0,0	5,10	6,0	11,4	159	99	0.000937365	0.0295234	0.0,0.0	0.254,0.0	-0.127
13310	ENSMUSG00000036676.14	Tmtc3	chr10	-	100485050	100485185	100485065	100485185	100477975	100478022	13310	41,40	12,3	13,14	0,1	114	99	0.00113335	0.0340005	0.748,0.921	1.0,0.924	-0.127
2673	ENSMUSG00000024174.9	Pot1b	chr17	-	55672771	55672893	55672830	55672893	55669739	55669896	2673	3,2	55,51	19,16	68,53	158	99	4.6571e-06	0.000375075	0.033,0.024	0.149,0.159	-0.126
39435	ENSMUSG00000006276.10	Eps15l1	chr8	-	72373005	72373076	72373025	72373076	72371685	72371822	39435	45,34	285239	41,42	97128	119	99	1.01649e-05	0.000729544	0.116,0.106	0.26,0.214	-0.126
14325	ENSMUSG00000029213.11	Commd8	chr5	-	72167962	72168156	72168071	72168156	72165350	72165506	14325	73,58	7,5	98101	2,1	198	99	0.000668778	0.0227011	0.839,0.853	0.961,0.981	-0.125
15106	ENSMUSG00000106864.3	Gtf3c2	chr5	-	31179617	31179909	31179883	31179909	31174231	31174495	15106	23,20	400427	58,35	130130	198	99	0	0	0.028,0.023	0.182,0.119	-0.125
15237	ENSMUSG00000024426.17	Atat1	chr17	-	35909621	35910009	35909928	35910009	35909430	35909491	15237	22,26	59,68	47,60	61,75	198	99	0.00127626	0.0367753	0.157,0.16	0.278,0.286	-0.124
15396	ENSMUSG00000026925.16	Inpp5e	chr2	-	26401785	26402206	26402099	26402206	26401600	26401698	15396	3,0	123101	20,16	64,56	198	99	1.23335e-12	5.45195e-10	0.012,0.0	0.135,0.125	-0.124
28353	ENSMUSG00000066456.14	Hmgn3	chr9	-	83110787	83111102	83110992	83111102	83109947	83110429	28353	63,78	328298	136129	222232	198	99	8.30099e-10	1.84519e-07	0.088,0.116	0.234,0.218	-0.124
2526	ENSMUSG00000026792.16	Lrsam1	chr2	-	32960935	32961255	32961043	32961255	32959516	32959613	2526	27,25	106111	41,27	55,58	198	99	0.000184863	0.0083135	0.113,0.101	0.272,0.189	-0.123
5962	ENSMUSG00000010110.17	Stx5a	chr19	+	8741469	8741960	8741469	8741575	8742253	8742670	5962	11,6	222202	39,37	97138	198	99	1.55431e-15	1.31441e-12	0.024,0.015	0.167,0.118	-0.123
39753	ENSMUSG00000001062.18	Vps9d1	chr8	-	123246440	123246930	123246724	123246930	123245943	123246073	39753	5,6	56,63	20,7	28,46	198	99	0.00118585	0.0352084	0.043,0.045	0.263,0.071	-0.123
13209	ENSMUSG00000020184.15	Mdm2	chr10	-	117709699	117710117	117709945	117710117	117705154	117705229	13209	777760	229242	905793	141153	198	99	1.00471e-05	0.000722712	0.629,0.611	0.762,0.722	-0.122
26803	ENSMUSG00000021327.19	Zkscan3	chr13	-	21402391	21402695	21402686	21402695	21396099	21396577	26803	47,27	5,1	33,43	0,0	198	99	0.00121504	0.0356181	0.825,0.931	1.0,1.0	-0.122
30844	ENSMUSG00000039678.12	Tbc1d13	chr2	+	30136552	30136901	30136552	30136713	30137120	30137182	30844	4,4	141159	22,18	55,79	198	99	3.36875e-12	1.32368e-09	0.014,0.012	0.167,0.102	-0.122
33183	ENSMUSG00000029672.16	Fam3c	chr6	-	22355741	22356098	22355994	22356098	22355013	22355234	33183	68,57	1,10	42,27	1,0	198	99	0.0014222	0.0398263	0.971,0.74	0.955,1.0	-0.122
34141	ENSMUSG00000096916.7	Zfp850	chr7	-	28012327	28012450	28012335	28012450	28008383	28008436	34141	4,2	87,59	8,13	48,54	107	99	0.000137958	0.00656865	0.041,0.03	0.134,0.182	-0.122
1701	ENSMUSG00000027405.16	Nop56	chr2	+	130277031	130277314	130277031	130277132	130277475	130277624	1701	23212039	33362891	43363676	31473366	198	99	5.85918e-08	8.02542e-06	0.258,0.261	0.408,0.353	-0.121
9919	ENSMUSG00000063018.6	2010204K13Rik	chrX	-	7422870	7422988	7422874	7422988	7412105	7412532	9919	0,0	12,7	6,0	18,8	103	99	0.000893946	0.0284916	0.0,0.0	0.243,0.0	-0.121
1316	ENSMUSG00000028468.15	Rgp1	chr4	+	43579374	43579509	43579374	43579424	43579886	43580023	1316	214174	11,19	118,99	1,0	184	99	6.60438e-07	7.15628e-05	0.913,0.831	0.984,1.0	-0.12
1632	ENSMUSG00000005417.17	Mprip	chr11	+	59737071	59737582	59737071	59737228	59741119	59741261	1632	267219	959816	207153	283284	198	99	2.02009e-10	5.06978e-08	0.122,0.118	0.268,0.212	-0.12
2641	ENSMUSG00000035762.11	Tmem161b	chr13	+	84283984	84284185	84283984	84284125	84286684	84286798	2641	43,35	109,91	77,49	99,70	159	99	0.00133681	0.0380687	0.197,0.193	0.326,0.304	-0.12
3042	ENSMUSG00000031169.13	Porcn	chrX	-	8198205	8199152	8199066	8199152	8197974	8198085	3042	3,2	33,20	7,12	20,27	198	99	0.00160021	0.0434522	0.043,0.048	0.149,0.182	-0.12
3223	ENSMUSG00000037103.8	Dcaf15	chr8	-	84097622	84097852	84097736	84097852	84097071	84097508	3223	186162	426297	155177	153209	198	99	6.03398e-06	0.000462051	0.179,0.214	0.336,0.297	-0.12
39553	ENSMUSG00000042694.17	Stn1	chr19	-	47536922	47537024	47536974	47537024	47536289	47536371	39553	78,71	6,10	69,60	2,0	151	99	0.000136314	0.00652177	0.895,0.823	0.958,1.0	-0.12
3446	ENSMUSG00000019082.18	Slc25a22	chr7	-	141432613	141432753	141432662	141432753	141432020	141432139	3446	3,4	89,75	15,9	54,38	148	99	7.87693e-06	0.000583643	0.022,0.034	0.157,0.137	-0.119
7592	ENSMUSG00000059323.14	Tonsl	chr15	-	76638678	76639023	76638839	76639023	76638556	76638601	7592	0,3	63,75	7,4	17,21	198	99	2.02742e-05	0.00131884	0.0,0.02	0.171,0.087	-0.119
18593	ENSMUSG00000092607.9	Scnm1	chr3	-	95132790	95132913	95132824	95132913	95129728	95129883	18593	0,1	27,18	6,5	24,27	133	99	0.000312698	0.012537	0.0,0.04	0.157,0.121	-0.119
28351	ENSMUSG00000066456.14	Hmgn3	chr9	-	83110774	83111102	83110992	83111102	83109947	83110429	28351	68,83	328298	136130	222232	198	99	8.04891e-09	1.33235e-06	0.094,0.122	0.234,0.219	-0.119
31452	ENSMUSG00000023191.9	P3h3	chr6	-	124854581	124854924	124854847	124854924	124854310	124854447	31452	4,1	68,65	8,2	13,24	198	99	0.0011631	0.0346435	0.029,0.008	0.235,0.04	-0.119
33181	ENSMUSG00000029672.16	Fam3c	chr6	-	22355661	22356098	22355994	22356098	22355013	22355234	33181	68,59	1,10	42,28	1,0	198	99	0.00143188	0.0399858	0.971,0.747	0.955,1.0	-0.119
22800	ENSMUSG00000044037.15	Als2cl	chr9	+	110885387	110885490	110885387	110885453	110885782	110885948	22800	11,14	396400	29,34	150133	136	99	5.88418e-15	4.40182e-12	0.02,0.025	0.123,0.157	-0.118
26309	ENSMUSG00000037761.16	Actr5	chr2	+	158631462	158631684	158631462	158631680	158632271	158632454	26309	2,3	88,66	7,8	41,41	103	99	0.000296546	0.0120792	0.021,0.042	0.141,0.158	-0.118
535	ENSMUSG00000021893.14	Capn7	chr14	+	31360124	31361245	31360124	31360245	31363478	31363623	535	40,31	294284	49,50	98141	198	99	8.4715e-10	1.86182e-07	0.064,0.052	0.2,0.151	-0.117
14738	ENSMUSG00000028959.14	Fastk	chr5	-	24444809	24445194	24445065	24445194	24443894	24444305	14738	26,40	409458	100,39	181193	198	99	5.49261e-12	2.05445e-09	0.031,0.042	0.216,0.092	-0.117
5184	ENSMUSG00000024498.16	Tcerg1	chr18	+	42552491	42552931	42552491	42552627	42553407	42553497	5184	53,30	403365	45,40	114100	198	99	9.50431e-11	2.65984e-08	0.062,0.039	0.165,0.167	-0.116
16356	ENSMUSG00000019261.3	Map1s	chr8	+	70911817	70912266	70911817	70911928	70912512	70912653	16356	21,11	340303	37,21	83,97	198	99	5.1914e-13	2.55627e-10	0.03,0.018	0.182,0.098	-0.116
38103	ENSMUSG00000070371.11	Prss36	chr7	-	127934354	127934516	127934389	127934516	127934138	127934280	38103	1,0	17,16	4,5	24,19	134	99	0.00151515	0.0419024	0.042,0.0	0.11,0.163	-0.116
27233	ENSMUSG00000027397.14	Slc20a1	chr2	+	129204058	129204304	129204058	129204155	129206366	129206486	27233	6,19	363268	39,37	112132	198	99	0	0	0.008,0.034	0.148,0.123	-0.115
30780	ENSMUSG00000033862.7	Cdk10	chr8	+	123230267	123230375	123230267	123230327	123230593	123230931	30780	0,5	60,58	14,10	50,48	147	99	3.30546e-05	0.0020359	0.0,0.055	0.159,0.123	-0.114
37048	ENSMUSG00000030609.18	Aen	chr7	+	78895926	78896254	78895926	78896014	78902229	78902830	37048	28,14	358273	68,34	143157	198	99	7.40075e-13	3.46854e-10	0.038,0.025	0.192,0.098	-0.114
1093	ENSMUSG00000015942.9	Gtf2ird2	chr5	+	134191179	134191427	134191179	134191277	134192652	134192791	1093	7,6	89,72	14,12	41,32	198	99	4.9797e-05	0.00284333	0.038,0.04	0.146,0.158	-0.113
3418	ENSMUSG00000070371.11	Prss36	chr7	-	127934389	127934627	127934509	127934627	127933370	127933492	3418	80,74	6,6	163119	1,2	198	99	0.000202843	0.00891258	0.87,0.86	0.988,0.967	-0.113
6274	ENSMUSG00000014767.17	Tbp	chr17	+	15499927	15500337	15499927	15500024	15501153	15501357	6274	10,10	53,64	25,25	48,58	198	99	0.000536544	0.0193255	0.086,0.072	0.207,0.177	-0.113
21729	ENSMUSG00000021413.9	Prpf4b	chr13	+	34899200	34899455	34899200	34899223	34899830	34899982	21729	32,30	402314	103,55	216207	198	99	2.62013e-14	1.67087e-11	0.038,0.046	0.193,0.117	-0.113
32576	ENSMUSG00000019518.11	Ap4m1	chr5	+	138172348	138172515	138172348	138172437	138172786	138172893	32576	28,21	321288	76,46	170204	177	99	3.44599e-11	1.08104e-08	0.047,0.039	0.2,0.112	-0.113
36114	ENSMUSG00000020648.3	Dus4l	chr12	-	31654341	31654806	31654689	31654806	31652290	31652441	36114	12,3	88,56	44,24	84100	198	99	2.28663e-05	0.00147512	0.064,0.026	0.208,0.107	-0.113
19963	ENSMUSG00000028961.15	Pgd	chr4	-	149159880	149160128	149160058	149160128	149157960	149158095	19963	15,19	200168	40,29	82109	198	99	2.87028e-08	4.13533e-06	0.036,0.054	0.196,0.117	-0.112
20755	ENSMUSG00000073609.9	D2hgdh	chr1	+	93826466	93826871	93826466	93826640	93829205	93829263	20755	11,16	109,83	29,24	50,76	198	99	8.14433e-05	0.00433399	0.048,0.088	0.225,0.136	-0.112
21651	ENSMUSG00000024561.10	Mbd1	chr18	+	74277516	74277847	74277516	74277578	74278678	74281234	21651	14,5	86,87	23,10	43,38	198	99	9.78975e-05	0.00501081	0.075,0.028	0.211,0.116	-0.112
25885	ENSMUSG00000028896.13	Rcc1	chr4	-	132338983	132339241	132339202	132339241	132338050	132338238	25885	6,13	103,87	17,16	38,50	198	99	4.24557e-05	0.00250232	0.028,0.07	0.183,0.138	-0.112
3276	ENSMUSG00000063511.11	Snrnp70	chr7	-	45381824	45383184	45383124	45383184	45380716	45380818	3276	148126	12,18	499332	22,11	198	99	0.000602299	0.0210696	0.86,0.778	0.919,0.938	-0.11
34378	ENSMUSG00000030103.11	Bhlhe40	chr6	+	108661160	108661392	108661160	108661230	108661504	108661612	34378	48,40	906773	70,54	162262	198	99	0	0	0.026,0.025	0.178,0.093	-0.11
1732	ENSMUSG00000037270.18	4932438A13Rik	chr3	+	36889822	36889996	36889822	36889902	36890794	36890945	1732	3,7	46,57	17,7	35,29	193	99	0.000673041	0.0227862	0.032,0.059	0.199,0.11	-0.109
10345	ENSMUSG00000022386.12	Trmu	chr15	+	85893962	85894283	85893962	85894020	85894925	85895026	10345	10,6	106,95	31,36	102,94	198	99	1.76867e-07	2.21226e-05	0.045,0.031	0.132,0.161	-0.109
37157	ENSMUSG00000032363.15	Adamts7	chr9	+	90191364	90191647	90191364	90191500	90191835	90191962	37157	1,2	58,52	14,3	27,36	198	99	2.0066e-05	0.00131188	0.009,0.019	0.206,0.04	-0.109
3069	ENSMUSG00000027411.17	Vps16	chr2	+	130440899	130441028	130440899	130441008	130441164	130441299	3069	34,30	521401	80,70	297345	119	99	1.98509e-11	6.48908e-09	0.051,0.059	0.183,0.144	-0.108
13287	ENSMUSG00000025369.15	Smarcc2	chr10	+	128487933	128488089	128487933	128488017	128488895	128490172	13287	3,4	148100	6,4	17,26	171	99	0.000247348	0.0105669	0.012,0.023	0.17,0.082	-0.108
26865	ENSMUSG00000039105.6	Atp6v1g1	chr4	+	63544771	63545126	63544771	63544789	63548584	63548685	26865	1,0	13,9	11,4	25,25	198	99	0.000666574	0.0226884	0.037,0.0	0.18,0.074	-0.108
41134	ENSMUSG00000085457.3	1110046J04Rik	chr13	+	33936031	33936097	33936031	33936083	33953316	33953541	41134	45,43	6,5	73,66	0,2	113	99	0.000188892	0.00839761	0.868,0.883	1.0,0.967	-0.108
969	ENSMUSG00000005682.9	Pan2	chr10	+	128318162	128318365	128318162	128318342	128318944	128319038	969	9,8	135115	13,11	48,56	122	99	0.000523538	0.0190678	0.051,0.053	0.18,0.137	-0.107
1291	ENSMUSG00000038828.13	Tmem214	chr5	+	30872686	30872904	30872686	30872768	30873042	30873144	1291	47,35	529430	81,48	157236	198	99	1.10608e-10	3.00885e-08	0.043,0.039	0.205,0.092	-0.107
1956	ENSMUSG00000044783.16	Hjurp	chr1	-	88275027	88275097	88275041	88275097	88272728	88272765	1956	62,66	797716	105,73	336420	113	99	1.54615e-09	3.11634e-07	0.064,0.075	0.215,0.132	-0.104
22102	ENSMUSG00000040459.11	Arglu1	chr8	-	8681823	8682263	8681890	8682263	8681383	8681467	22102	70,79	9,5	227134	1,5	166	99	0.0002778	0.011484	0.823,0.904	0.993,0.941	-0.104
16851	ENSMUSG00000044813.15	Shb	chr4	-	45489320	45489794	45489670	45489794	45489054	45489175	16851	80,66	7,4	40,37	0,1	198	99	0.00101562	0.0312314	0.851,0.892	1.0,0.949	-0.103
27203	ENSMUSG00000053332.13	Gas5	chr1	+	161036604	161037103	161036604	161036852	161037287	161037547	27203	729591	42503865	22751602	45154441	198	99	0	0	0.079,0.071	0.201,0.153	-0.102
5169	ENSMUSG00000024807.18	Syvn1	chr19	+	6050521	6050833	6050521	6050685	6050940	6051069	5169	1,1	48,38	6,4	20,19	198	99	0.000180338	0.00818569	0.01,0.013	0.13,0.095	-0.101
17673	ENSMUSG00000078578.9	Ube2d3	chr3	+	135438532	135438780	135438532	135438562	135439643	135439798	17673	316327	21,15	326226	35,33	198	99	0.000502409	0.0184201	0.883,0.916	0.823,0.774	0.101
30028	ENSMUSG00000025747.12	Tyms	chr5	-	30071226	30071707	30071633	30071707	30069833	30069955	30028	111,97	2,2	224188	25,10	198	99	0.00024668	0.0105609	0.965,0.96	0.818,0.904	0.101
352	ENSMUSG00000041720.14	Pi4ka	chr16	-	17322987	17323070	17323036	17323070	17318482	17318553	352	236181	4,0	38,39	6,1	148	99	0.00174551	0.0461908	0.975,1.0	0.809,0.963	0.102
5309	ENSMUSG00000042834.15	Nrep	chr18	-	33463599	33463854	33463741	33463854	33463377	33463419	5309	70,82	1,0	73,55	2,6	198	99	0.000980778	0.0304245	0.972,1.0	0.948,0.821	0.102
1697	ENSMUSG00000024911.7	Fibp	chr19	+	5463170	5463325	5463170	5463304	5463603	5463712	1697	202194	256261	146143	298302	120	99	0.000875045	0.0280852	0.394,0.38	0.288,0.281	0.103
6226	ENSMUSG00000041482.17	Piezo2	chr18	-	63146795	63147006	63146890	63147006	63144914	63145128	6226	244237	0,1	59,71	7,1	194	99	0.000185102	0.00831462	1.0,0.992	0.811,0.973	0.104
17671	ENSMUSG00000078578.9	Ube2d3	chr3	+	135438532	135438769	135438532	135438562	135439643	135439798	17671	310325	21,15	314222	35,33	198	99	0.000389013	0.0149828	0.881,0.915	0.818,0.771	0.104
17675	ENSMUSG00000078578.9	Ube2d3	chr3	+	135438532	135438876	135438532	135438562	135439643	135439798	17675	311325	21,15	313223	35,33	198	99	0.000379886	0.0147187	0.881,0.915	0.817,0.772	0.104
22302	ENSMUSG00000079658.9	Eloc	chr1	-	16656586	16657042	16656991	16657042	16656295	16656459	22302	50,38	1,0	89,39	8,2	198	99	0.000787331	0.0258675	0.962,1.0	0.848,0.907	0.104
17672	ENSMUSG00000078578.9	Ube2d3	chr3	+	135438532	135438774	135438532	135438562	135439643	135439798	17672	312326	21,15	313222	35,33	198	99	0.000349096	0.0137448	0.881,0.916	0.817,0.771	0.105
22816	ENSMUSG00000044037.15	Als2cl	chr9	+	110890084	110890183	110890084	110890179	110890300	110890462	22816	520451	22,35	154142	53,11	103	99	0.000129388	0.00625818	0.958,0.925	0.736,0.925	0.111
31415	ENSMUSG00000039069.19	Mtg2	chr2	+	180084450	180084589	180084450	180084582	180085379	180085902	31415	123115	10,8	111169	25,35	106	99	0.000136471	0.00652177	0.92,0.931	0.806,0.819	0.113
29164	ENSMUSG00000002833.11	Hdgfl2	chr17	+	56081316	56081716	56081316	56081390	56082099	56082176	29164	118115	0,1	58,71	5,4	198	99	0.000131922	0.00634334	1.0,0.983	0.853,0.899	0.116
8298	ENSMUSG00000047153.4	Khnyn	chr14	+	55887713	55887844	55887713	55887837	55887920	55888017	8298	112114	2,2	61,32	4,8	106	99	0.000220655	0.0095744	0.981,0.982	0.934,0.789	0.12
28168	ENSMUSG00000073791.11	Efcab7	chr4	+	99829439	99829554	99829439	99829535	99831389	99831580	28168	33,35	2,0	60,65	11,8	118	99	0.000605652	0.0211489	0.933,1.0	0.821,0.872	0.12
31810	ENSMUSG00000032754.14	Slc8b1	chr5	+	120525658	120525800	120525658	120525796	120527740	120527862	31810	45,41	0,1	36,30	6,4	103	99	0.000161657	0.00749517	1.0,0.975	0.852,0.878	0.123
32208	ENSMUSG00000034211.14	Mrps17	chr5	+	129715496	129715984	129715496	129715945	129716726	129716866	32208	0,6	10,13	0,0	12,11	138	99	0.00162129	0.0438279	0.0,0.249	0.0,0.0	0.124
10734	ENSMUSG00000034120.18	Srsf2	chr11	-	116850700	116850961	116850855	116850961	116850107	116850353	10734	112,71	184117	55,55	220233	198	99	9.348e-08	1.23686e-05	0.233,0.233	0.111,0.106	0.125
9832	ENSMUSG00000046675.7	Tmem251	chr12	+	102743761	102744166	102743761	102743770	102744599	102747561	9832	241203	72,65	252239	135120	198	99	0.00102951	0.0315837	0.626,0.61	0.483,0.499	0.127
2489	ENSMUSG00000053453.9	Thoc7	chr14	-	13957459	13957631	13957553	13957631	13954538	13954656	2489	234235	23,26	510361	109,81	193	99	8.39709e-05	0.00443814	0.839,0.823	0.706,0.696	0.13
19174	ENSMUSG00000027995.10	Tlr2	chr3	-	83840888	83841136	83841023	83841136	83836271	83838789	19174	32,22	1,0	28,35	1,6	198	99	0.00185697	0.0484807	0.941,1.0	0.933,0.745	0.131
41928	ENSMUSG00000037373.12	Ctbp1	chr5	-	33250307	33250501	33250385	33250501	33249586	33249714	41928	15,3	29,17	1,0	10,14	177	99	0.000132154	0.00634666	0.224,0.09	0.053,0.0	0.131
17285	ENSMUSG00000028689.14	Ccdc163	chr4	+	116708963	116709273	116708963	116709094	116709437	116709619	17285	90,71	4,0	79,72	13,4	198	99	0.00155588	0.0427126	0.918,1.0	0.752,0.9	0.133
17556	ENSMUSG00000053317.11	Sec61b	chr4	+	47474763	47474839	47474763	47474777	47474911	47475009	17556	3,15	0,0	24,27	0,6	161	99	0.00123433	0.036129	1.0,1.0	1.0,0.735	0.133
20036	ENSMUSG00000018572.10	Phf23	chr11	+	69996940	69997290	69996940	69997061	69997596	69997628	20036	5,2	15,7	0,0	4,6	198	99	0.00191783	0.0498489	0.143,0.125	0.0,0.0	0.134
29038	ENSMUSG00000053453.9	Thoc7	chr14	-	13957061	13957559	13957553	13957559	13954538	13954656	29038	172198	23,26	407313	109,81	198	99	0.000295541	0.0120509	0.789,0.792	0.651,0.659	0.135
34704	ENSMUSG00000063870.12	Chd4	chr6	+	125096568	125096971	125096568	125096571	125097086	125097371	34704	5,2	9,18	0,0	5,4	198	99	0.00171821	0.0456701	0.217,0.053	0.0,0.0	0.135
18349	ENSMUSG00000109771.1	Gm35315	chr5	-	110080483	110080818	110080737	110080818	110076135	110079380	18349	53,59	0,1	87,81	7,8	198	99	6.30663e-05	0.00346508	1.0,0.967	0.861,0.835	0.136
39943	ENSMUSG00000037993.8	Dhx38	chr8	-	109554147	109554260	109554160	109554260	109553344	109553553	39943	452406	9,10	100118	16,21	112	99	1.37997e-11	4.62767e-09	0.978,0.973	0.847,0.832	0.136
1052	ENSMUSG00000062012.14	Zfp13	chr17	-	23581056	23581270	23581077	23581270	23580770	23580862	1052	108123	5,10	39,70	7,18	120	99	0.000347203	0.0136848	0.947,0.91	0.821,0.762	0.137
3125	ENSMUSG00000002028.13	Kmt2a	chr9	-	44833897	44834020	44833906	44834020	44832860	44833045	3125	12,8	48,38	0,1	18,12	108	99	0.000190924	0.00846858	0.186,0.162	0.0,0.071	0.138
11866	ENSMUSG00000040599.13	Mis12	chr11	+	71019610	71019976	71019610	71019723	71024549	71024711	11866	234242	27,39	134121	38,32	198	99	0.00129843	0.0372759	0.812,0.756	0.638,0.654	0.138
21741	ENSMUSG00000021413.9	Prpf4b	chr13	+	34903188	34903602	34903188	34903273	34904043	34904089	21741	108,98	76,79	192113	260167	198	99	0.000143444	0.00678002	0.415,0.383	0.27,0.253	0.138
9312	ENSMUSG00000037851.13	Iars	chr13	+	49682190	49682644	49682190	49682308	49687385	49687511	9312	24,15	46,41	2,1	15,21	198	99	0.000147863	0.00697194	0.207,0.155	0.062,0.023	0.139
2348	ENSMUSG00000027333.18	Smox	chr2	+	131520094	131521171	131520094	131520268	131522058	131522219	2348	399346	28,21	111145	16,29	198	99	6.71732e-05	0.00367	0.877,0.892	0.776,0.714	0.14
40448	ENSMUSG00000031821.11	Gins2	chr8	-	120588728	120589034	120588925	120589034	120586092	120586192	40448	27,13	0,0	67,54	2,8	198	99	0.000430019	0.0162563	1.0,1.0	0.944,0.771	0.143
10745	ENSMUSG00000020806.15	Rhbdf2	chr11	-	116604377	116604506	116604382	116604506	116603931	116604050	10745	101,90	6,5	31,36	8,8	104	99	0.000936811	0.0295234	0.941,0.945	0.787,0.811	0.144
34451	ENSMUSG00000066621.12	Tecpr1	chr5	-	144217225	144217408	144217268	144217408	144216902	144217025	34451	197134	0,5	71108	15,9	142	99	4.2454e-07	4.843e-05	1.0,0.949	0.767,0.893	0.144
34075	ENSMUSG00000021428.9	Riok1	chr13	+	38043908	38045315	38043908	38043978	38047244	38047350	34075	344230	8,2	140183	13,23	198	99	2.22148e-08	3.27276e-06	0.956,0.983	0.843,0.799	0.149
20044	ENSMUSG00000018572.10	Phf23	chr11	+	69996990	69997290	69996990	69997059	69997596	69997628	20044	5,2	8,15	0,0	5,11	198	99	0.000778547	0.0256439	0.238,0.062	0.0,0.0	0.15
15593	ENSMUSG00000026035.15	Ppil3	chr1	-	58445027	58445369	58445366	58445369	58444588	58444639	15593	194170	26,8	212205	34,57	198	99	0.0015963	0.0434522	0.789,0.914	0.757,0.643	0.152
15599	ENSMUSG00000026035.15	Ppil3	chr1	-	58445027	58445486	58445331	58445486	58444588	58444639	15599	317294	36,46	363336	125,81	198	99	1.52036e-05	0.00103215	0.815,0.762	0.592,0.675	0.155
32015	ENSMUSG00000031352.10	Hccs	chrX	-	169319782	169320280	169320114	169320280	169319437	169319590	32015	76,91	85,89	54,32	100123	198	99	1.09237e-05	0.000775423	0.309,0.338	0.213,0.115	0.16
26814	ENSMUSG00000028677.19	Rnf220	chr4	-	117289202	117289446	117289405	117289446	117289025	117289068	26814	80,73	1,0	37,23	3,3	198	99	0.000697841	0.0234041	0.976,1.0	0.86,0.793	0.161
15587	ENSMUSG00000026035.15	Ppil3	chr1	-	58444810	58445429	58445366	58445429	58444588	58444639	15587	197174	26,8	204196	34,57	198	99	0.000795186	0.0260377	0.791,0.916	0.75,0.632	0.162
1692	ENSMUSG00000041147.10	Brca2	chr5	+	150531683	150532402	150531683	150531733	150534592	150534642	1692	98,98	1,0	31,26	2,4	198	99	0.000523997	0.0190678	0.98,1.0	0.886,0.765	0.164
15609	ENSMUSG00000026035.15	Ppil3	chr1	-	58445082	58445486	58445331	58445486	58444588	58444639	15609	307284	36,46	342312	125,81	198	99	5.88738e-06	0.000452607	0.81,0.755	0.578,0.658	0.164
22506	ENSMUSG00000040852.6	Plekhh2	chr17	+	84565970	84566935	84565970	84566102	84569875	84569951	22506	141105	0,0	40,31	4,3	198	99	5.1244e-05	0.00290503	1.0,1.0	0.833,0.838	0.165
36670	ENSMUSG00000037148.8	Arhgap10	chr8	-	77365097	77365160	77365125	77365160	77358546	77358634	36670	209201	39,24	80,90	43,24	127	99	0.000607446	0.0211833	0.807,0.867	0.592,0.745	0.168
15603	ENSMUSG00000026035.15	Ppil3	chr1	-	58445082	58445369	58445366	58445369	58444588	58444639	15603	184160	26,8	191181	34,57	198	99	0.00106465	0.0323807	0.78,0.909	0.737,0.614	0.169
19499	ENSMUSG00000020646.17	Mboat2	chr12	+	24830878	24830985	24830878	24830899	24878190	24878336	19499	9,7	0,0	7,18	0,5	185	99	0.00139202	0.0392388	1.0,1.0	1.0,0.658	0.171
2695	ENSMUSG00000063810.7	Alms1	chr6	+	85608985	85610532	85608985	85609125	85610817	85610936	2695	85,80	68,41	42,33	54,49	198	99	0.00159467	0.0434522	0.385,0.494	0.28,0.252	0.173
10243	ENSMUSG00000035451.7	Foxa1	chr12	-	57546448	57546916	57546543	57546916	57545833	57546111	10243	8,4	10,34	0,0	5,8	194	99	0.000475436	0.0176474	0.29,0.057	0.0,0.0	0.173
17369	ENSMUSG00000078485.3	Plekhn1	chr4	-	156233223	156233445	156233290	156233445	156232628	156232745	17369	133122	17,6	76,73	17,21	166	99	0.000548268	0.0196749	0.824,0.924	0.727,0.675	0.173
30005	ENSMUSG00000050565.16	Tor1aip2	chr1	+	156051278	156051727	156051278	156051623	156059410	156059587	30005	784720	170119	275287	111117	198	99	1.27947e-07	1.63185e-05	0.698,0.752	0.553,0.551	0.173
2060	ENSMUSG00000036281.13	Snapc4	chr2	-	26372730	26372825	26372758	26372825	26370832	26370880	2060	117135	9,7	62,36	15,10	127	99	7.26352e-05	0.00392978	0.91,0.938	0.763,0.737	0.174
14071	ENSMUSG00000029334.14	Prkg2	chr5	-	98971851	98972005	98971874	98972005	98969936	98970073	14071	69,66	1,3	33,40	6,10	122	99	3.87792e-05	0.00232436	0.982,0.947	0.817,0.764	0.174
29486	ENSMUSG00000028047.11	Thbs3	chr3	+	89219054	89219264	89219054	89219257	89219388	89219537	29486	92,70	7,5	54,36	22,8	106	99	5.19138e-05	0.00293524	0.925,0.929	0.696,0.808	0.175
1975	ENSMUSG00000041459.15	Tardbp	chr4	-	148618646	148618791	148618664	148618791	148612381	148617705	1975	836685	140111	670664	293292	117	99	4.42979e-14	2.69248e-11	0.835,0.839	0.659,0.658	0.178
507	ENSMUSG00000040701.16	Ap1g2	chr14	-	55104581	55104927	55104830	55104927	55104362	55104458	507	128131	1,1	73,81	19,2	198	99	6.95822e-06	0.000523112	0.985,0.985	0.658,0.953	0.179
41313	ENSMUSG00000032342.13	Mto1	chr9	+	78461519	78461691	78461519	78461594	78464883	78465002	41313	160141	13,9	60,83	18,13	196	99	0.00104427	0.0319241	0.861,0.888	0.627,0.763	0.179
17358	ENSMUSG00000078485.3	Plekhn1	chr4	-	156230900	156230974	156230913	156230974	156230504	156230686	17358	117109	8,6	82,57	19,20	112	99	2.23228e-06	0.000199164	0.928,0.941	0.792,0.716	0.18
36411	ENSMUSG00000001755.12	Coasy	chr11	+	101082617	101083105	101082617	101082690	101084315	101084530	36411	72,87	25,37	83,62	59,58	198	99	0.000676875	0.0228801	0.59,0.54	0.413,0.348	0.184
36424	ENSMUSG00000032067.6	Pts	chr9	-	50528145	50528646	50528289	50528646	50526869	50526949	36424	17,15	0,0	39,29	5,3	198	99	0.000169444	0.00780967	1.0,1.0	0.796,0.829	0.188
37493	ENSMUSG00000015126.9	Tsr3	chr17	+	25240169	25240642	25240169	25240345	25241063	25241257	37493	24,15	0,0	23,20	2,3	198	99	0.00181037	0.0475274	1.0,1.0	0.852,0.769	0.19
8696	ENSMUSG00000057411.9	Fam173a	chr17	-	25792052	25792798	25792727	25792798	25791571	25791676	8696	154157	34,16	153163	78,46	198	99	0.00163023	0.0439777	0.694,0.831	0.495,0.639	0.196
25898	ENSMUSG00000044768.16	D1Ertd622e	chr1	-	97660730	97661676	97661287	97661676	97654599	97654689	25898	154130	15,12	49,73	13,21	198	99	0.000266397	0.0111309	0.837,0.844	0.653,0.635	0.197
2943	ENSMUSG00000030960.16	Eef1akmt2	chr7	-	132850590	132850709	132850594	132850709	132831359	132831576	2943	16,11	0,0	22,15	8,2	103	99	4.24524e-05	0.00250232	1.0,1.0	0.726,0.878	0.198
31499	ENSMUSG00000027637.3	Rab5if	chr2	+	156863138	156863632	156863138	156863616	156865256	156866987	31499	10,6	0,0	15,12	1,5	115	99	0.000284542	0.0116882	1.0,1.0	0.928,0.674	0.199
12225	ENSMUSG00000037243.17	Zfp692	chr11	+	58307068	58307256	58307068	58307194	58307573	58307761	12225	17,23	0,0	44,12	11,1	161	99	1.55309e-05	0.0010507	1.0,1.0	0.711,0.881	0.204
25865	ENSMUSG00000038126.17	Mphosph9	chr5	-	124298621	124298967	124298688	124298967	124297554	124297710	25865	140146	18,13	57,57	17,21	166	99	7.06262e-05	0.00383709	0.823,0.87	0.667,0.618	0.204
3148	ENSMUSG00000066894.14	Vsig10	chr5	+	117334767	117335067	117334767	117335042	117338206	117338461	3148	71,52	0,1	19,22	5,4	124	99	6.96493e-06	0.000523112	1.0,0.976	0.752,0.815	0.205
17993	ENSMUSG00000108037.2	Gm44597	chr6	+	125048367	125050052	125048367	125048600	125050433	125050649	17993	1,4	0,0	27,20	2,4	198	99	0.000351165	0.0137894	1.0,1.0	0.871,0.714	0.208
38834	ENSMUSG00000031557.16	Plekha2	chr8	-	25101491	25101771	25101646	25101771	25088341	25088505	38834	12,8	16,23	0,0	5,13	198	99	7.01201e-06	0.000524552	0.273,0.148	0.0,0.0	0.211
34085	ENSMUSG00000071337.11	Tia1	chr6	+	86424961	86425074	86424961	86425058	86425449	86425545	34085	9,7	0,0	19,10	2,4	115	99	0.000262088	0.0109744	1.0,1.0	0.891,0.683	0.213
10429	ENSMUSG00000062054.7	Iah1	chr12	+	21316435	21316646	21316435	21316512	21317929	21318046	10429	2,7	0,0	17,29	5,1	198	99	0.000399264	0.0152635	1.0,1.0	0.63,0.935	0.218
17778	ENSMUSG00000062006.12	Rpl34	chr3	-	130729524	130729790	130729747	130729790	130729228	130729302	17778	10,2	0,0	13,12	5,0	198	99	0.00170905	0.0455118	1.0,1.0	0.565,1.0	0.218
20035	ENSMUSG00000018572.10	Phf23	chr11	+	69996940	69997290	69996940	69997036	69997596	69997628	20035	5,2	8,4	0,0	3,1	198	99	0.000529924	0.0191759	0.238,0.2	0.0,0.0	0.219
25589	ENSMUSG00000043542.12	Zc2hc1a	chr3	+	7503482	7503955	7503482	7503951	7516455	7516532	25589	4,3	14,10	0,0	2,6	103	99	0.000385374	0.0148721	0.215,0.224	0.0,0.0	0.22
23739	ENSMUSG00000039630.10	Hnrnpu	chr1	-	178329117	178329407	178329221	178329407	178325242	178325313	23739	100,54	0,0	25,44	7,2	198	99	9.50415e-06	0.00068976	1.0,1.0	0.641,0.917	0.221
35193	ENSMUSG00000006333.14	Rps9	chr7	+	3703992	3704149	3703992	3704060	3704326	3704448	35193	18,14	0,0	16,17	2,3	188	99	0.000979161	0.0303985	1.0,1.0	0.808,0.749	0.222
3700	ENSMUSG00000074259.10	Gramd2	chr9	+	59712083	59712179	59712083	59712146	59713795	59713940	3700	5,7	8,12	2,0	7,17	132	99	0.000525916	0.019118	0.319,0.304	0.176,0.0	0.224
12561	ENSMUSG00000025384.15	Faap100	chr11	-	120373881	120374651	120374416	120374651	120372109	120372226	12561	3,3	4,7	0,0	1,1	198	99	0.000815849	0.02658	0.273,0.176	0.0,0.0	0.225
37492	ENSMUSG00000015126.9	Tsr3	chr17	+	25240169	25240364	25240169	25240345	25241063	25241257	37492	10,8	0,0	12,9	2,3	118	99	0.00113304	0.0340005	1.0,1.0	0.834,0.716	0.225
30936	ENSMUSG00000022822.16	Abcc5	chr16	-	20425536	20425921	20425847	20425921	20422304	20422485	30936	7,5	9,12	0,0	4,15	198	99	1.1555e-05	0.000809891	0.28,0.172	0.0,0.0	0.226
36978	ENSMUSG00000043831.12	Lysmd4	chr7	+	67222615	67223038	67222615	67222649	67223608	67223891	36978	16,17	0,0	9,36	2,3	198	99	0.00183154	0.0479777	1.0,1.0	0.692,0.857	0.226
26943	ENSMUSG00000046909.9	Tefm	chr11	-	80140405	80140570	80140465	80140570	80139865	80140323	26943	0,8	7,6	0,0	10,11	159	99	0.000763264	0.0252723	0.0,0.454	0.0,0.0	0.227
31659	ENSMUSG00000025027.18	Xpnpep1	chr19	-	53032613	53032703	53032624	53032703	53032008	53032097	31659	3,7	18,13	0,0	2,8	110	99	0.000127717	0.00619615	0.13,0.326	0.0,0.0	0.228
15703	ENSMUSG00000042446.16	Zmym4	chr4	-	126967638	126967899	126967811	126967899	126948433	126948479	15703	6,3	7,8	0,0	3,5	198	99	0.000114212	0.00568139	0.3,0.158	0.0,0.0	0.229
23420	ENSMUSG00000004768.14	Rab23	chr1	+	33719886	33720376	33719886	33720020	33721607	33721712	23420	4,2	14,2	0,0	3,2	198	99	0.00124229	0.0362442	0.125,0.333	0.0,0.0	0.229
2788	ENSMUSG00000048495.16	Tyw5	chr1	-	57393584	57393694	57393669	57393694	57393349	57393487	2788	3,13	1,0	28,24	9,12	184	99	0.000664149	0.0226825	0.617,1.0	0.626,0.518	0.236
30424	ENSMUSG00000001248.15	Gramd1a	chr7	-	31143512	31143564	31143548	31143564	31142807	31142888	30424	11,3	0,0	17,6	5,1	135	99	0.000131057	0.00631736	1.0,1.0	0.714,0.815	0.236
20746	ENSMUSG00000000823.16	Zfp512b	chr2	-	181592413	181592758	181592653	181592758	181590859	181590985	20746	31,32	1,0	14,17	2,4	198	99	0.00040661	0.0154918	0.939,1.0	0.778,0.68	0.24
22008	ENSMUSG00000108621.1	Gm37494	chr7	+	39552499	39552970	39552499	39552905	39553227	39553750	22008	4,2	6,5	0,0	5,2	164	99	0.000369352	0.0143966	0.287,0.194	0.0,0.0	0.24
14609	ENSMUSG00000037339.17	Fam53a	chr5	-	33629124	33629583	33629277	33629583	33628852	33628977	14609	5,1	6,2	0,0	3,4	198	99	0.000280642	0.0115769	0.294,0.2	0.0,0.0	0.247
21162	ENSMUSG00000031671.11	Setd6	chr8	+	95716637	95716978	95716637	95716801	95717920	95718066	21162	14,14	0,1	32,19	4,7	198	99	0.000534795	0.0192804	1.0,0.875	0.8,0.576	0.25
23424	ENSMUSG00000087381.8	Gm16008	chr4	-	156030164	156030516	156030421	156030516	156028474	156028554	23424	2,4	3,6	0,0	10,5	198	99	0.000305589	0.0123123	0.25,0.25	0.0,0.0	0.25
20345	ENSMUSG00000029312.12	Klhl8	chr5	-	103911115	103911259	103911209	103911259	103885906	103886290	20345	20,14	0,0	21,11	2,3	193	99	0.000622197	0.0216026	1.0,1.0	0.843,0.653	0.252
22252	ENSMUSG00000005718.8	Tfap4	chr16	-	4558568	4558783	4558664	4558783	4551934	4552100	22252	2,6	1,0	1,0	0,2	195	99	0.00181522	0.0475821	0.504,1.0	1.0,0.0	0.252
39895	ENSMUSG00000031897.9	Psmb10	chr8	-	105936496	105936981	105936807	105936981	105936013	105936147	39895	1,5	10,3	0,0	13,11	198	99	0.0012509	0.0364494	0.048,0.455	0.0,0.0	0.252
7498	ENSMUSG00000068220.6	Lgals1	chr15	+	78926724	78926830	78926724	78926802	78927969	78928049	7498	1,4	4,6	0,0	14,2	127	99	0.000549596	0.0196863	0.163,0.342	0.0,0.0	0.253
7143	ENSMUSG00000038009.7	Dnajc22	chr15	+	99099411	99099600	99099411	99099484	99100822	99101775	7143	15,12	0,0	40,57	9,7	198	99	3.14179e-05	0.00194921	1.0,1.0	0.69,0.803	0.254
22007	ENSMUSG00000108621.1	Gm37494	chr7	+	39552499	39552970	39552499	39552899	39553227	39553750	22007	4,2	5,5	0,0	1,5	170	99	0.000188623	0.00839522	0.318,0.189	0.0,0.0	0.254
12566	ENSMUSG00000020459.14	Mtif2	chr11	+	29526407	29526800	29526407	29526482	29529928	29530228	12566	19,18	0,0	21,18	2,5	198	99	4.69608e-05	0.00271035	1.0,1.0	0.84,0.643	0.258
26908	ENSMUSG00000020069.16	Hnrnph3	chr10	-	63023637	63023847	63023698	63023847	63019392	63019527	26908	35,57	0,1	22,24	7,4	160	99	2.72349e-06	0.000239151	1.0,0.972	0.66,0.788	0.262
20612	ENSMUSG00000026817.14	Ak1	chr2	+	32629503	32629914	32629503	32629880	32630234	32630398	20612	69,67	9,3	21,22	12,7	133	99	0.00020101	0.00886539	0.851,0.943	0.566,0.701	0.264
21078	ENSMUSG00000041147.10	Brca2	chr5	+	150522629	150522926	150522629	150522898	150523174	150523279	21078	4,1	4,8	0,0	2,6	127	99	0.00123745	0.0361494	0.438,0.089	0.0,0.0	0.264
23055	ENSMUSG00000050953.10	Gja1	chr10	+	56379087	56379387	56379087	56379140	56387533	56390415	23055	1,6	4,4	0,0	1,6	198	99	0.000187344	0.00836701	0.111,0.429	0.0,0.0	0.27
38388	ENSMUSG00000045777.14	Ifitm10	chr7	-	142371830	142372259	142372165	142372259	142371142	142371310	38388	4,1	7,1	0,0	1,9	198	99	0.0015862	0.0433005	0.222,0.333	0.0,0.0	0.278
28858	ENSMUSG00000030301.17	Ccdc91	chr6	+	147475827	147475939	147475827	147475895	147507783	147507827	28858	4,3	6,5	0,1	5,15	143	99	0.000290571	0.0118731	0.316,0.293	0.0,0.044	0.282
9535	ENSMUSG00000015672.4	Mrpl32	chr13	-	14612907	14613015	14612979	14613015	14611422	14611604	9535	11,8	12,6	4,2	13,17	171	99	0.000881517	0.0282376	0.347,0.436	0.151,0.064	0.284
22757	ENSMUSG00000075225.14	Ccdc162	chr10	-	41553072	41553565	41553415	41553565	41552317	41552470	22757	5,1	0,0	20,15	2,5	198	99	6.63051e-05	0.00362766	1.0,1.0	0.833,0.6	0.284
12012	ENSMUSG00000020921.6	Tmem101	chr11	-	102156143	102156355	102156234	102156355	102155814	102155904	12012	11,6	0,0	10,7	7,0	190	99	0.000701075	0.0234899	1.0,1.0	0.427,1.0	0.286
28898	ENSMUSG00000060373.15	Hnrnpc	chr14	-	52097321	52098544	52098014	52098544	52092079	52092327	28898	23,18	2,0	18,21	5,6	198	99	0.000984135	0.03048	0.852,1.0	0.643,0.636	0.286
37378	ENSMUSG00000042700.16	Sipa1l1	chr12	+	82170015	82170425	82170015	82170410	82234462	82235788	37378	4,3	8,7	0,0	8,10	114	99	6.3274e-05	0.00347159	0.303,0.271	0.0,0.0	0.287
14800	ENSMUSG00000010936.11	Vac14	chr8	+	110632448	110632744	110632448	110632611	110633452	110633515	14800	7,8	0,1	6,9	1,5	198	99	0.00133137	0.0379765	1.0,0.8	0.75,0.474	0.288
6577	ENSMUSG00000002846.9	Timmdc1	chr16	-	38522325	38522641	38522404	38522641	38518366	38518532	6577	4,5	0,0	12,10	2,3	178	99	0.000346449	0.0136821	1.0,1.0	0.769,0.65	0.29
21164	ENSMUSG00000031671.11	Setd6	chr8	+	95716637	95717062	95716637	95716801	95717920	95718101	21164	11,10	0,1	26,13	4,7	198	99	0.000586216	0.0206437	1.0,0.833	0.765,0.481	0.293
36757	ENSMUSG00000030498.15	Gas2	chr7	+	51992876	51993188	51992876	51993010	51993290	51994975	36757	1,3	0,0	7,2	5,0	198	99	0.00125862	0.0365426	1.0,1.0	0.412,1.0	0.294
35192	ENSMUSG00000006333.14	Rps9	chr7	+	3703992	3704113	3703992	3704060	3704326	3704448	35192	5,8	0,0	8,10	2,3	152	99	0.000483911	0.0178767	1.0,1.0	0.723,0.685	0.296
35001	ENSMUSG00000022538.20	Lsg1	chr16	-	30577898	30577997	30577927	30577997	30574545	30574606	35001	12,5	0,0	8,7	3,2	128	99	0.000390451	0.0150233	1.0,1.0	0.673,0.73	0.298
10515	ENSMUSG00000020594.14	Pum2	chr12	+	8674133	8674288	8674133	8674264	8698090	8698159	10515	5,3	4,2	0,1	5,1	123	99	0.000715644	0.0238957	0.502,0.547	0.0,0.446	0.301
15629	ENSMUSG00000026035.15	Ppil3	chr1	-	58445363	58445439	58445371	58445439	58444588	58444639	15629	19,13	2,1	12,11	4,11	107	99	0.00126821	0.0366237	0.898,0.923	0.735,0.481	0.303
21383	ENSMUSG00000028149.12	Rap1gds1	chr3	-	139021765	139021935	139021769	139021935	139015545	139015671	21383	2,5	1,0	4,2	3,2	103	99	0.00164827	0.044219	0.658,1.0	0.562,0.49	0.303
26141	ENSMUSG00000090553.8	Snrpe	chr1	-	133610181	133610215	133610190	133610215	133608896	133608959	26141	19,8	12,6	25,12	58,33	108	99	0.000351126	0.0137894	0.592,0.55	0.283,0.25	0.304
33069	ENSMUSG00000019373.11	Cops3	chr11	-	59825375	59825674	59825569	59825674	59824313	59824448	33069	10,6	1,0	10,6	3,2	198	99	0.00165835	0.0443976	0.833,1.0	0.625,0.6	0.304
17712	ENSMUSG00000028165.9	Cisd2	chr3	-	135410952	135411219	135411085	135411219	135406411	135408890	17712	4,1	2,4	0,0	4,5	198	99	0.00134171	0.0381805	0.5,0.111	0.0,0.0	0.305
5285	ENSMUSG00000003779.16	Kif20a	chr18	+	34624612	34625012	34624612	34624852	34625457	34625641	5285	9,4	3,14	1,0	4,8	198	99	0.000530437	0.0191766	0.6,0.125	0.111,0.0	0.307
34086	ENSMUSG00000071337.11	Tia1	chr6	+	86424961	86425129	86424961	86425058	86425449	86425545	34086	10,8	0,0	19,8	2,4	170	99	9.06699e-05	0.0047011	1.0,1.0	0.847,0.538	0.307
1584	ENSMUSG00000031387.14	Renbp	chrX	-	73930186	73930262	73930228	73930262	73930004	73930080	1584	3,4	0,0	7,7	4,1	141	99	0.000187622	0.00836983	1.0,1.0	0.551,0.831	0.309
23690	ENSMUSG00000055660.9	Mettl4	chr17	-	94749736	94749892	94749829	94749892	94747616	94748417	23690	7,11	0,1	6,10	3,2	192	99	0.00172455	0.0457917	1.0,0.85	0.508,0.721	0.31
38071	ENSMUSG00000030814.17	Bcl7c	chr7	-	127707486	127707958	127707879	127707958	127707175	127707304	38071	21,21	1,1	9,23	5,5	198	99	0.00161454	0.0437364	0.913,0.913	0.474,0.697	0.328
10516	ENSMUSG00000020594.14	Pum2	chr12	+	8674133	8674438	8674133	8674264	8698090	8698159	10516	2,5	4,2	1,0	5,1	198	99	0.00141149	0.0396153	0.2,0.556	0.091,0.0	0.333
6383	ENSMUSG00000022965.8	Ifngr2	chr16	+	91554947	91555227	91554947	91555066	91557884	91558078	6383	1,4	0,1	1,0	0,5	198	99	0.000351294	0.0137894	1.0,0.667	1.0,0.0	0.334
11152	ENSMUSG00000017404.12	Rpl19	chr11	+	98026956	98027454	98026956	98027026	98027822	98028147	11152	10,9	6,6	2,3	14,9	198	99	0.000185492	0.00832256	0.455,0.429	0.067,0.143	0.337
25856	ENSMUSG00000024983.10	Vti1a	chr19	+	55499242	55499315	55499242	55499304	55576473	55577001	25856	1,7	2,3	1,0	2,3	110	99	0.000951502	0.0297775	0.31,0.677	0.31,0.0	0.339
29468	ENSMUSG00000062646.12	Ganc	chr2	+	120404200	120404290	120404200	120404269	120406265	120406328	29468	5,1	4,2	1,0	6,4	120	99	0.000582561	0.0205641	0.508,0.292	0.121,0.0	0.34
15623	ENSMUSG00000026035.15	Ppil3	chr1	-	58445336	58445439	58445371	58445439	58444588	58444639	15623	19,10	2,1	10,11	4,11	134	99	0.00120755	0.0354518	0.875,0.881	0.649,0.425	0.341
5286	ENSMUSG00000003779.16	Kif20a	chr18	+	34624612	34625052	34624612	34624852	34625457	34625641	5286	14,3	3,14	1,0	4,8	198	99	0.000630957	0.0218365	0.7,0.097	0.111,0.0	0.343
11220	ENSMUSG00000078700.10	D030028A08Rik	chr11	+	96959335	96959713	96959335	96959615	96960860	96960996	11220	27,19	0,1	9,13	6,2	197	99	6.12449e-05	0.00338187	1.0,0.905	0.43,0.766	0.355
21604	ENSMUSG00000030924.16	Rexo5	chr7	+	119831292	119831550	119831292	119831476	119832670	119832780	21604	7,1	0,0	19,10	3,6	173	99	1.79201e-05	0.00118957	1.0,1.0	0.784,0.488	0.364
29545	ENSMUSG00000033970.15	Rfc3	chr5	-	151650576	151650749	151650723	151650749	151649871	151650009	29545	17,6	0,0	10,10	4,2	198	99	1.35684e-05	0.000930886	1.0,1.0	0.556,0.714	0.365
18709	ENSMUSG00000034744.13	Nagk	chr6	+	83796906	83797092	83796906	83797070	83797176	83797275	18709	9,7	1,0	4,4	3,2	121	99	0.000666655	0.0226884	0.88,1.0	0.522,0.621	0.368
19028	ENSMUSG00000041736.7	Tspo	chr15	+	83563591	83563786	83563591	83563640	83571384	83571595	19028	11,9	1,0	8,8	2,5	198	99	0.000302603	0.0122362	0.846,1.0	0.667,0.444	0.368
8896	ENSMUSG00000068184.7	Ndufaf2	chr13	-	108090713	108090856	108090787	108090856	108081352	108081393	8896	2,5	2,1	0,1	2,1	173	99	0.00131513	0.0376443	0.364,0.741	0.0,0.364	0.37
17475	ENSMUSG00000028256.16	Odf2l	chr3	+	145119525	145119717	145119525	145119702	145124210	145124375	17475	8,6	0,0	7,3	1,4	114	99	0.00028753	0.0117956	1.0,1.0	0.859,0.394	0.373
35811	ENSMUSG00000001999.15	Blvra	chr2	+	127070664	127071120	127070664	127071000	127080529	127080658	35811	5,5	0,0	2,4	0,6	198	99	0.00150222	0.0416214	1.0,1.0	1.0,0.25	0.375
42123	ENSMUSG00000074923.10	Pak6	chr2	+	118696102	118696292	118696102	118696228	118696406	118698020	42123	10,1	4,2	1,0	7,8	163	99	4.35415e-05	0.00255998	0.603,0.233	0.08,0.0	0.378
26811	ENSMUSG00000028677.19	Rnf220	chr4	-	117288315	117288772	117288369	117288772	117285928	117285972	26811	3,3	5,2	0,0	2,3	153	99	5.64312e-05	0.00316307	0.28,0.493	0.0,0.0	0.387
33730	ENSMUSG00000030960.16	Eef1akmt2	chr7	-	132852211	132852379	132852317	132852379	132851425	132851491	33730	10,17	0,0	10,16	4,4	198	99	4.06773e-06	0.000333829	1.0,1.0	0.556,0.667	0.388
20250	ENSMUSG00000025764.14	Jade1	chr3	+	41564919	41565402	41564919	41565010	41581194	41581272	20250	33,27	13,11	5,3	7,21	198	99	4.27098e-06	0.000347576	0.559,0.551	0.263,0.067	0.39
7109	ENSMUSG00000023021.15	Cers5	chr15	-	99772674	99772885	99772738	99772885	99751235	99751341	7109	4,3	1,0	5,1	1,3	163	99	0.00134721	0.0383089	0.708,1.0	0.752,0.168	0.394
13158	ENSMUSG00000022994.9	Adcy6	chr15	-	98600171	98600486	98600394	98600486	98599899	98600027	13158	2,7	1,0	3,1	1,4	198	99	0.000683661	0.0230654	0.5,1.0	0.6,0.111	0.395
21948	ENSMUSG00000078812.10	Eif5a	chr11	-	69921177	69921190	69921181	69921190	69919150	69919336	21948	2,5	5,2	0,1	5,4	103	99	0.000656946	0.0225553	0.278,0.706	0.0,0.194	0.395
16314	ENSMUSG00000047909.11	Ankrd16	chr2	+	11779884	11780190	11779884	11780128	11781476	11783756	16314	3,4	4,1	0,1	3,2	161	99	0.00115306	0.0343973	0.316,0.711	0.0,0.235	0.396
27718	ENSMUSG00000116461.1	Gm44502	chr15	-	89422124	89422396	89422288	89422396	89421344	89421540	27718	8,6	0,0	8,7	2,3	198	99	5.48804e-05	0.00308951	1.0,1.0	0.667,0.538	0.397
10245	ENSMUSG00000035451.7	Foxa1	chr12	-	57546448	57546916	57546780	57546916	57545833	57546111	10245	9,4	2,7	0,1	3,4	198	99	0.000353705	0.0138631	0.692,0.222	0.0,0.111	0.401
28473	ENSMUSG00000074604.9	Mgst2	chr3	+	51676935	51677060	51676935	51677024	51677564	51677635	28473	1,2	0,0	2,4	1,2	135	99	0.00192474	0.0499816	1.0,1.0	0.595,0.595	0.405
36262	ENSMUSG00000029267.17	Mtf2	chr5	+	108072570	108072789	108072570	108072655	108073306	108073454	36262	4,3	0,1	2,5	2,3	198	99	0.00152421	0.0421107	1.0,0.6	0.333,0.455	0.406
840	ENSMUSG00000038178.16	Slc43a2	chr11	+	75531697	75531778	75531697	75531741	75532587	75532788	840	4,5	0,0	8,2	4,1	136	99	0.000137814	0.00656865	1.0,1.0	0.593,0.593	0.407
35437	ENSMUSG00000012848.15	Rps5	chr7	+	12925822	12926290	12925822	12925856	12926395	12926494	35437	4,2	1,0	8,8	6,5	198	99	0.00178628	0.0470774	0.667,1.0	0.4,0.444	0.411
30922	ENSMUSG00000074643.12	Cpne1	chr2	-	156111597	156111965	156111785	156111965	156098229	156098372	30922	4,6	3,3	1,0	6,1	198	99	0.000105864	0.00536212	0.4,0.5	0.077,0.0	0.412
6135	ENSMUSG00000079641.3	Rpl39	chrX	-	37084636	37085016	37084899	37085016	37083984	37084088	6135	6,2	0,0	5,5	1,3	198	99	0.000448409	0.0168207	1.0,1.0	0.714,0.455	0.415
16435	ENSMUSG00000091586.2	Cyp4f17	chr17	+	32528275	32528363	32528275	32528358	32528716	32530143	16435	3,1	0,1	2,0	1,3	104	99	0.000650589	0.0223766	1.0,0.488	0.656,0.0	0.416
42088	ENSMUSG00000030970.16	Ctbp2	chr7	-	133112573	133112699	133112620	133112699	133081756	133081860	42088	8,1	2,6	0,0	3,1	146	99	0.000134801	0.00645783	0.731,0.102	0.0,0.0	0.416
42072	ENSMUSG00000090290.2	Tarbp1	chr8	-	126443896	126444325	126444134	126444325	126440753	126440874	42072	1,5	0,0	10,4	1,4	198	99	9.43042e-05	0.00485243	1.0,1.0	0.833,0.333	0.417
31164	ENSMUSG00000029510.15	Gpc2	chr5	-	138276185	138276338	138276251	138276338	138275928	138276075	31164	3,3	1,0	5,2	4,2	165	99	0.0010364	0.0317447	0.643,1.0	0.429,0.375	0.419
15841	ENSMUSG00000003873.11	Bax	chr7	-	45466499	45466775	45466767	45466775	45466219	45466271	15841	9,9	0,1	7,3	3,2	198	99	0.000474971	0.0176474	1.0,0.818	0.538,0.429	0.425
14813	ENSMUSG00000029068.16	Ccnl2	chr4	+	155818538	155819000	155818538	155818749	155820328	155820428	14813	5,1	0,0	2,1	6,0	198	99	0.000961973	0.0299846	1.0,1.0	0.143,1.0	0.428
4992	ENSMUSG00000053950.10	Adnp2	chr18	-	80138152	80138304	80138243	80138304	80137483	80137573	4992	7,10	0,0	4,5	1,3	190	99	0.000341582	0.0135449	1.0,1.0	0.676,0.465	0.429
33182	ENSMUSG00000029672.16	Fam3c	chr6	-	22355741	22356073	22355756	22356073	22355013	22355234	33182	1,5	4,2	0,0	4,5	114	99	4.54497e-05	0.00264007	0.178,0.685	0.0,0.0	0.431
28406	ENSMUSG00000024218.13	Taf11	chr17	-	27908769	27909139	27908991	27909139	27907808	27908243	28406	23,5	1,0	5,4	2,2	198	99	0.000529753	0.0191759	0.92,1.0	0.556,0.5	0.432
39571	ENSMUSG00000003808.18	Farsa	chr8	+	84861830	84862041	84861830	84861915	84864057	84864150	39571	4,2	0,0	5,4	3,1	198	99	0.000299239	0.0121381	1.0,1.0	0.455,0.667	0.439
33444	ENSMUSG00000029687.16	Ezh2	chr6	-	47595183	47595341	47595282	47595341	47577543	47577667	33444	15,18	0,0	5,5	2,2	198	99	9.89596e-05	0.00505187	1.0,1.0	0.556,0.556	0.444
27965	ENSMUSG00000040482.16	Dxo	chr17	+	34837392	34837785	34837392	34837703	34837900	34838359	27965	14,10	0,0	9,7	3,4	181	99	2.04678e-06	0.000185162	1.0,1.0	0.621,0.489	0.445
17599	ENSMUSG00000004127.12	Trmt10a	chr3	+	138143860	138143995	138143860	138143957	138146286	138146393	17599	10,10	0,0	4,8	5,2	137	99	4.86968e-06	0.000388975	1.0,1.0	0.366,0.743	0.446
22682	ENSMUSG00000033852.16	Gm28042	chr2	+	120030815	120030918	120030815	120030876	120031574	120031651	22682	3,1	0,0	1,1	6,0	141	99	0.0008943	0.0284916	1.0,1.0	0.105,1.0	0.448
27136	ENSMUSG00000008305.18	Tle1	chr4	-	72160068	72160209	72160108	72160209	72158271	72158417	27136	3,2	3,1	0,1	8,6	139	99	0.000481008	0.0178033	0.416,0.588	0.0,0.106	0.449
24864	ENSMUSG00000015092.9	Edf1	chr2	+	25560539	25560739	25560539	25560732	25560968	25561361	24864	1,3	1,0	0,3	2,2	106	99	0.00157276	0.0430241	0.483,1.0	0.0,0.583	0.45
21664	ENSMUSG00000024454.16	Hdac3	chr18	-	37954330	37954764	37954404	37954764	37952595	37952613	21664	5,4	2,1	0,1	2,1	173	99	0.000423315	0.016034	0.589,0.696	0.0,0.364	0.46
28113	ENSMUSG00000001750.16	Tcirg1	chr19	-	3898757	3899119	3898979	3899119	3898547	3898638	28113	5,2	0,0	7,4	5,1	198	99	2.82843e-06	0.000246221	1.0,1.0	0.412,0.667	0.461
41040	ENSMUSG00000032308.9	Ulk3	chr9	+	57590323	57590776	57590323	57590753	57591213	57591318	41040	11,5	1,1	3,3	3,5	122	99	0.000516007	0.0188476	0.899,0.802	0.448,0.327	0.463
35000	ENSMUSG00000022538.20	Lsg1	chr16	-	30577798	30577997	30577927	30577997	30574545	30574606	35000	5,4	0,0	8,4	3,2	198	99	5.6972e-05	0.00318879	1.0,1.0	0.571,0.5	0.465
6055	ENSMUSG00000036775.13	Decr2	chr17	-	26087109	26087459	26087323	26087459	26083844	26083938	6055	3,1	1,1	0,0	4,2	198	99	0.00132643	0.037912	0.6,0.333	0.0,0.0	0.467
41964	ENSMUSG00000062127.11	Cttnbp2nl	chr3	-	105052794	105053146	105053032	105053146	105038864	105038987	41964	6,3	2,3	0,0	4,1	198	99	5.00957e-06	0.000396082	0.6,0.333	0.0,0.0	0.467
41366	ENSMUSG00000005510.9	Ndufs3	chr2	-	90904152	90904488	90904418	90904488	90902846	90902944	41366	15,10	3,0	11,13	10,9	198	99	0.00102671	0.0315226	0.714,1.0	0.355,0.419	0.47
22567	ENSMUSG00000026718.17	Stam	chr2	+	14074426	14074764	14074426	14074547	14102400	14102485	22567	4,4	5,1	0,0	3,4	198	99	1.71801e-05	0.00114829	0.286,0.667	0.0,0.0	0.477
12464	ENSMUSG00000020397.15	Med7	chr11	+	46436924	46437243	46436924	46437235	46439805	46439975	12464	4,1	0,0	4,2	3,2	107	99	7.56805e-05	0.00406626	1.0,1.0	0.552,0.481	0.484
21962	ENSMUSG00000078812.10	Eif5a	chr11	-	69920780	69921064	69921041	69921064	69920340	69920434	21962	1,6	0,0	4,8	1,7	198	99	7.22029e-07	7.69505e-05	1.0,1.0	0.667,0.364	0.484
38916	ENSMUSG00000046111.17	Cep295	chr9	-	15343663	15343931	15343667	15343931	15343472	15343557	38916	1,3	3,1	0,0	2,2	103	99	0.000868853	0.0279326	0.243,0.742	0.0,0.0	0.492
27957	ENSMUSG00000047649.9	Cd3eap	chr7	-	19359368	19359481	19359402	19359481	19359089	19359231	27957	3,14	0,0	3,5	4,2	133	99	3.26948e-06	0.000280756	1.0,1.0	0.358,0.65	0.496
10633	ENSMUSG00000018012.11	Rac3	chr11	+	120721572	120721799	120721572	120721620	120722230	120722302	10633	4,10	0,1	7,1	2,2	198	99	0.000272527	0.0113141	1.0,0.833	0.636,0.2	0.498
11360	ENSMUSG00000054079.12	Utp18	chr11	-	93860586	93860687	93860659	93860687	93859242	93860068	11360	3,3	0,0	0,1	3,0	172	99	0.000370936	0.0144294	1.0,1.0	0.0,1.0	0.5
14739	ENSMUSG00000028959.14	Fastk	chr5	-	24444809	24445206	24445016	24445206	24443894	24444305	14739	2,3	0,0	0,1	2,0	198	99	0.00119564	0.0352084	1.0,1.0	0.0,1.0	0.5
17750	ENSMUSG00000028029.10	Aimp1	chr3	-	132683363	132683590	132683466	132683590	132677004	132677138	17750	2,4	0,0	0,1	2,0	198	99	0.00119564	0.0352084	1.0,1.0	0.0,1.0	0.5
19551	ENSMUSG00000060121.15	Gemin2	chr12	+	59013392	59013690	59013392	59013523	59013969	59014054	19551	1,4	0,0	1,0	0,2	198	99	0.00119564	0.0352084	1.0,1.0	1.0,0.0	0.5
20559	ENSMUSG00000059796.16	Eif4a1	chr11	-	69671243	69671450	69671379	69671450	69670927	69670976	20559	1,1	0,0	0,1	2,0	198	99	0.00119564	0.0352084	1.0,1.0	0.0,1.0	0.5
26534	ENSMUSG00000026202.13	Tuba4a	chr1	-	75218525	75218624	75218535	75218624	75217211	75217434	26534	2,4	0,0	1,0	0,4	109	99	0.000651187	0.0223774	1.0,1.0	1.0,0.0	0.5
27643	ENSMUSG00000026784.14	Pdss1	chr2	+	22896047	22896426	22896047	22896252	22901280	22901345	27643	2,4	1,2	0,0	1,2	198	99	6.04302e-05	0.00334868	0.5,0.5	0.0,0.0	0.5
29084	ENSMUSG00000032966.14	Fkbp1a	chr2	+	151542736	151543198	151542736	151543122	151543905	151544140	29084	2,1	0,0	1,0	0,2	175	99	0.00173328	0.0459609	1.0,1.0	1.0,0.0	0.5
31207	ENSMUSG00000030536.10	Iqgap1	chr7	-	80802895	80803263	80803164	80803263	80799849	80799949	31207	4,1	0,0	0,1	2,0	198	99	0.00119564	0.0352084	1.0,1.0	0.0,1.0	0.5
40894	ENSMUSG00000056531.11	Ccdc18	chr5	+	108197136	108197607	108197136	108197241	108197756	108197970	40894	1,2	0,0	1,0	0,2	198	99	0.00119564	0.0352084	1.0,1.0	1.0,0.0	0.5
11011	ENSMUSG00000075528.13	Aarsd1	chr11	-	101416848	101416925	101416857	101416925	101413936	101414096	11011	5,2	1,0	6,2	7,3	108	99	0.00017487	0.00798997	0.821,1.0	0.44,0.379	0.501
21712	ENSMUSG00000062580.9	Timm17a	chr1	-	135313554	135313691	135313582	135313691	135309770	135309870	21712	7,1	1,4	0,0	3,5	127	99	4.63944e-05	0.00268164	0.845,0.163	0.0,0.0	0.504
15219	ENSMUSG00000067916.9	Zfp991	chr4	+	147132037	147132360	147132037	147132189	147134571	147134664	15219	2,2	1,0	1,1	1,3	198	99	0.000447199	0.0167916	0.5,1.0	0.333,0.143	0.512
15702	ENSMUSG00000042446.16	Zmym4	chr4	-	126967638	126967899	126967806	126967899	126948433	126948479	15702	6,3	1,4	0,0	1,1	198	99	1.74244e-05	0.00116262	0.75,0.273	0.0,0.0	0.512
11147	ENSMUSG00000017404.12	Rpl19	chr11	+	98026923	98027313	98026923	98027113	98027822	98028147	11147	3,4	0,0	5,2	3,1	198	99	9.41862e-05	0.00485243	1.0,1.0	0.455,0.5	0.522
41438	ENSMUSG00000108592.1	Gm38973	chr7	-	27650869	27651059	27650998	27651059	27649425	27650242	41438	7,4	0,1	5,9	7,8	198	99	7.9545e-05	0.00425041	1.0,0.667	0.263,0.36	0.522
19334	ENSMUSG00000078784.8	1810022K09Rik	chr3	-	14606834	14607071	14606949	14607071	14606292	14606408	19334	7,10	1,0	3,3	2,4	198	99	3.66713e-05	0.00223164	0.778,1.0	0.429,0.273	0.538
40287	ENSMUSG00000074129.14	Rpl13a	chr7	-	45128128	45128626	45128404	45128626	45127495	45127568	40287	3,3	0,0	5,10	6,3	198	99	6.58878e-07	7.15628e-05	1.0,1.0	0.294,0.625	0.54
7589	ENSMUSG00000053929.17	Cyhr1	chr15	-	76659709	76660108	76659954	76660108	76659218	76659505	7589	3,3	0,0	6,2	1,5	198	99	8.36439e-06	0.000613375	1.0,1.0	0.75,0.167	0.541
41173	ENSMUSG00000029146.14	Snx17	chr5	+	31193226	31193638	31193226	31193473	31193868	31193943	41173	7,15	0,3	3,5	5,4	198	99	0.00145849	0.0406412	1.0,0.714	0.231,0.385	0.549
32329	ENSMUSG00000048495.16	Tyw5	chr1	-	57393586	57393691	57393669	57393691	57393349	57393487	32329	2,7	1,0	5,5	9,12	182	99	6.8016e-05	0.00371083	0.521,1.0	0.232,0.185	0.552
11291	ENSMUSG00000020868.15	Xylt2	chr11	-	94667012	94667233	94667089	94667233	94666226	94666531	11291	7,5	1,0	0,4	2,1	176	99	0.000996343	0.030809	0.797,1.0	0.0,0.692	0.553
17725	ENSMUSG00000073147.3	5031425E22Rik	chr5	-	23386592	23387037	23386963	23387037	23385074	23385172	17725	3,5	0,1	2,3	2,4	198	99	0.000202996	0.00891258	1.0,0.714	0.333,0.273	0.554
17751	ENSMUSG00000028029.10	Aimp1	chr3	-	132683363	132683836	132683619	132683836	132677004	132677138	17751	2,4	4,0	0,1	3,5	198	99	0.000996287	0.030809	0.2,1.0	0.0,0.091	0.554
3084	ENSMUSG00000037363.9	Letm2	chr8	-	25593718	25594166	25593750	25594166	25592451	25592595	3084	6,8	1,0	0,12	2,4	131	99	0.000576808	0.0204352	0.819,1.0	0.0,0.694	0.562
17415	ENSMUSG00000020739.11	Nup85	chr11	+	115564433	115564699	115564433	115564556	115565153	115565247	17415	1,3	1,0	0,1	1,2	198	99	9.60896e-05	0.00493776	0.333,1.0	0.0,0.2	0.567
29882	ENSMUSG00000074519.11	Zfp971	chr2	+	178023283	178023560	178023283	178023353	178031254	178031381	29882	7,5	4,0	0,2	4,2	198	99	0.0016095	0.0436608	0.467,1.0	0.0,0.333	0.567
11153	ENSMUSG00000017404.12	Rpl19	chr11	+	98026956	98027454	98026956	98027113	98027822	98028147	11153	10,9	0,0	2,3	3,1	198	99	4.84718e-05	0.00278516	1.0,1.0	0.25,0.6	0.575
6967	ENSMUSG00000068663.14	Clec16a	chr16	+	10545397	10545890	10545397	10545725	10560020	10560149	6967	3,2	0,5	0,0	3,2	198	99	0.00139405	0.0392392	1.0,0.167	0.0,0.0	0.584
22432	ENSMUSG00000029071.16	Dvl1	chr4	+	155853616	155853926	155853616	155853758	155854329	155854468	22432	2,4	1,1	0,0	3,1	198	99	4.89027e-06	0.000389022	0.5,0.667	0.0,0.0	0.584
41054	ENSMUSG00000032316.8	Clk3	chr9	-	57764444	57764853	57764472	57764853	57761715	57761867	41054	2,1	1,0	0,1	2,1	127	99	7.59933e-05	0.00407743	0.609,1.0	0.0,0.438	0.586
4045	ENSMUSG00000047694.12	Yipf6	chrX	+	98937272	98937412	98937272	98937321	98938185	98938288	4045	5,3	4,0	1,0	2,1	190	99	0.000791968	0.0259541	0.394,1.0	0.207,0.0	0.594
20344	ENSMUSG00000029312.12	Klhl8	chr5	-	103911053	103911259	103911209	103911259	103885906	103886290	20344	1,4	0,0	5,2	2,3	198	99	1.90223e-06	0.000172487	1.0,1.0	0.556,0.25	0.597
29575	ENSMUSG00000040952.16	Rps19	chr7	+	24884916	24885383	24884916	24885336	24885451	24885552	29575	8,3	1,0	5,0	2,2	146	99	0.000382058	0.0147881	0.844,1.0	0.629,0.0	0.607
21965	ENSMUSG00000078812.10	Eif5a	chr11	-	69920805	69921064	69921041	69921064	69920340	69920434	21965	5,1	0,0	3,3	1,7	198	99	1.21527e-07	1.56019e-05	1.0,1.0	0.6,0.176	0.612
16313	ENSMUSG00000047909.11	Ankrd16	chr2	+	11779884	11780190	11779884	11780084	11781476	11783756	16313	3,4	2,0	0,1	7,2	198	99	4.42613e-05	0.00258815	0.429,1.0	0.0,0.2	0.615
22572	ENSMUSG00000002307.16	Daxx	chr17	+	33909413	33909493	33909413	33909463	33910430	33910671	22572	2,4	2,0	0,2	1,6	129	99	0.00132233	0.0378226	0.434,1.0	0.0,0.204	0.615
38828	ENSMUSG00000031557.16	Plekha2	chr8	-	25101487	25101771	25101640	25101771	25088341	25088505	38828	18,15	0,0	3,3	3,2	198	99	1.65059e-06	0.000155468	1.0,1.0	0.333,0.429	0.619
27204	ENSMUSG00000053332.13	Gas5	chr1	+	161036604	161037103	161036604	161036956	161037287	161037547	27204	10,5	3,0	3,2	7,4	198	99	0.000704976	0.0236003	0.625,1.0	0.176,0.2	0.625
25399	ENSMUSG00000024906.10	Mus81	chr19	-	5486212	5486348	5486254	5486348	5486028	5486114	25399	2,1	0,0	3,1	2,3	141	99	1.2705e-06	0.000123866	1.0,1.0	0.513,0.19	0.648
27962	ENSMUSG00000048856.9	Slc25a47	chr12	+	108836045	108836580	108836045	108836180	108837428	108837497	27962	4,5	0,0	1,2	2,1	198	99	0.000676993	0.0228801	1.0,1.0	0.2,0.5	0.65
32107	ENSMUSG00000038023.12	Atp6v0a2	chr5	+	124714113	124714408	124714113	124714236	124716304	124716515	32107	2,2	0,1	0,1	3,2	198	99	2.84887e-05	0.00179033	1.0,0.5	0.0,0.2	0.65
33984	ENSMUSG00000052369.8	Tmem106c	chr15	+	97964199	97964378	97964199	97964283	97964839	97965030	33984	4,2	0,1	1,0	2,2	194	99	4.37166e-06	0.00035355	1.0,0.505	0.203,0.0	0.651
11660	ENSMUSG00000058546.8	Rpl23a	chr11	-	78183158	78183584	78183508	78183584	78182802	78182986	11660	3,1	0,1	0,0	1,2	198	99	4.10295e-05	0.00243672	1.0,0.333	0.0,0.0	0.666
20335	ENSMUSG00000115149.1	9330188P03Rik	chr14	+	105589973	105590263	105589973	105590159	105592691	105593299	20335	1,4	1,0	0,0	2,5	198	99	6.58837e-06	0.000499586	0.333,1.0	0.0,0.0	0.666
12500	ENSMUSG00000040594.19	Ranbp17	chr11	-	33512949	33513094	33513046	33513094	33504681	33504828	12500	1,3	1,0	0,0	1,3	196	99	3.85807e-05	0.00231961	0.336,1.0	0.0,0.0	0.668
26465	ENSMUSG00000026021.15	Sumo1	chr1	-	59645126	59645170	59645140	59645170	59644516	59644594	26465	2,2	0,0	2,0	1,2	113	99	0.00077117	0.025444	1.0,1.0	0.637,0.0	0.681
14602	ENSMUSG00000037339.17	Fam53a	chr5	-	33628848	33628970	33628852	33628970	33600355	33600880	14602	1,1	0,0	4,1	6,3	103	99	2.10178e-07	2.56299e-05	1.0,1.0	0.391,0.243	0.683
16006	ENSMUSG00000037608.16	Bclaf1	chr10	+	20312468	20312730	20312468	20312567	20318007	20318111	16006	3,5	0,0	4,3	8,2	198	99	7.21761e-09	1.22072e-06	1.0,1.0	0.2,0.429	0.685
39205	ENSMUSG00000029776.11	Hibadh	chr6	-	52628940	52629367	52629116	52629367	52622850	52622960	39205	2,3	0,0	3,1	2,2	198	99	1.321e-05	0.000909504	1.0,1.0	0.429,0.2	0.685
33985	ENSMUSG00000052369.8	Tmem106c	chr15	+	97964199	97964399	97964199	97964283	97964839	97965030	33985	2,3	0,1	1,0	2,2	198	99	7.32122e-06	0.000545585	1.0,0.6	0.2,0.0	0.7
16971	ENSMUSG00000028453.10	Fancg	chr4	-	43005206	43005277	43005210	43005277	43004743	43005008	16971	9,6	3,0	2,0	5,5	103	99	9.90841e-06	0.000716426	0.743,1.0	0.278,0.0	0.732
18478	ENSMUSG00000022828.10	Gtf2e1	chr16	-	37539476	37539776	37539696	37539776	37535720	37536193	18478	8,9	1,0	0,1	1,1	198	99	0.000271237	0.0112846	0.8,1.0	0.0,0.333	0.734
16080	ENSMUSG00000038712.16	Mindy1	chr3	+	95291906	95292013	95291906	95291965	95292124	95292283	16080	6,1	0,0	0,3	3,2	147	99	2.71208e-07	3.25617e-05	1.0,1.0	0.0,0.503	0.748
13214	ENSMUSG00000020184.15	Mdm2	chr10	-	117710669	117710758	117710742	117710758	117709945	117710028	13214	2,2	0,0	2,1	3,2	172	99	1.43673e-06	0.000137657	1.0,1.0	0.277,0.223	0.75
15445	ENSMUSG00000092356.1	Gm20532	chr2	+	26632603	26632738	26632603	26632729	26634986	26635163	15445	3,5	0,0	0,3	4,3	108	99	5.53496e-08	7.63511e-06	1.0,1.0	0.0,0.478	0.761
31560	ENSMUSG00000021606.8	Ndufs6	chr13	-	73320286	73320385	73320306	73320385	73319878	73320060	31560	2,2	0,0	0,1	1,1	119	99	0.00134889	0.0383143	1.0,1.0	0.0,0.454	0.773
38837	ENSMUSG00000031557.16	Plekha2	chr8	-	25101508	25101771	25101640	25101771	25088341	25088505	38837	4,1	0,0	2,1	3,2	198	99	6.87344e-07	7.36576e-05	1.0,1.0	0.25,0.2	0.775
20300	ENSMUSG00000051469.14	Zfp24	chr18	-	24020229	24020370	24020349	24020370	24017970	24018168	20300	4,1	0,0	1,1	4,1	198	99	3.52122e-09	6.49172e-07	1.0,1.0	0.111,0.333	0.778
38832	ENSMUSG00000031557.16	Plekha2	chr8	-	25101491	25101771	25101508	25101771	25088341	25088505	38832	11,7	4,1	0,0	2,1	116	99	6.08624e-07	6.74515e-05	0.701,0.857	0.0,0.0	0.779
4562	ENSMUSG00000038658.15	Ric1	chr19	+	29578884	29579015	29578884	29578976	29579764	29581489	4562	2,1	0,0	1,1	4,2	138	99	1.61625e-08	2.44639e-06	1.0,1.0	0.152,0.264	0.792
35552	ENSMUSG00000006024.13	Napa	chr7	+	16115103	16115345	16115103	16115303	16115599	16115650	35552	3,7	0,0	0,1	1,1	141	99	0.000788252	0.0258759	1.0,1.0	0.0,0.413	0.793
9749	ENSMUSG00000007411.16	Mark3	chr12	+	111597983	111598387	111597983	111598126	111604510	111604564	9749	5,1	0,0	0,4	1,3	198	99	1.8345e-05	0.00121364	1.0,1.0	0.0,0.4	0.8
18121	ENSMUSG00000027884.16	Clcc1	chr3	+	108653989	108654345	108653989	108654069	108661354	108661495	18121	4,6	0,0	1,1	2,2	198	99	1.02022e-06	0.000103082	1.0,1.0	0.2,0.2	0.8
32256	ENSMUSG00000034442.11	Trmt5	chr12	-	73286447	73286709	73286623	73286709	73285903	73285975	32256	3,1	1,0	0,0	2,3	198	99	1.09835e-05	0.000778246	0.6,1.0	0.0,0.0	0.8
41963	ENSMUSG00000062127.11	Cttnbp2nl	chr3	-	105052794	105053146	105052984	105053146	105038864	105038987	41963	6,3	2,0	0,0	1,2	198	99	1.69157e-07	2.12952e-05	0.6,1.0	0.0,0.0	0.8
37825	ENSMUSG00000033904.16	Ccp110	chr7	+	118712551	118712795	118712551	118712737	118714105	118714248	37825	1,2	0,0	0,1	2,1	157	99	3.33599e-06	0.000285208	1.0,1.0	0.0,0.387	0.806
5458	ENSMUSG00000024248.14	Cox7a2l	chr17	-	83513995	83514330	83514017	83514330	83504099	83504228	5458	2,1	1,0	0,0	3,1	121	99	4.96394e-05	0.00283967	0.621,1.0	0.0,0.0	0.81
31045	ENSMUSG00000041859.10	Mcm3	chr1	-	20803780	20803962	20803852	20803962	20803164	20803654	31045	1,2	0,0	0,2	1,2	171	99	0.000120014	0.00588624	1.0,1.0	0.0,0.367	0.817
41509	ENSMUSG00000051234.6	Rnf7	chr9	-	96473842	96474005	96473919	96474005	96471762	96471852	41509	4,1	0,0	1,6	6,9	176	99	9.56429e-08	1.25693e-05	1.0,1.0	0.086,0.273	0.821
16813	ENSMUSG00000057541.14	Pus7	chr5	-	23749994	23750112	23749998	23750112	23749804	23749866	16813	2,1	1,0	0,0	13,10	103	99	2.47362e-05	0.00158003	0.658,1.0	0.0,0.0	0.829
24519	ENSMUSG00000085396.7	Firre	chrX	-	50560440	50560609	50560576	50560609	50558346	50558384	24519	2,2	0,0	1,1	3,2	198	99	1.48839e-07	1.88594e-05	1.0,1.0	0.143,0.2	0.829
25180	ENSMUSG00000013033.16	Adgrl1	chr8	+	83928667	83928895	83928667	83928891	83929463	83930264	25180	5,6	0,3	0,0	2,4	103	99	5.80029e-09	1.00992e-06	1.0,0.658	0.0,0.0	0.829
17727	ENSMUSG00000073147.3	5031425E22Rik	chr5	-	23433775	23434269	23434134	23434269	23403725	23403816	17727	1,1	0,0	2,0	2,2	198	99	2.87223e-07	3.39604e-05	1.0,1.0	0.333,0.0	0.834
38484	ENSMUSG00000037519.17	Ppfia1	chr7	-	144514871	144515220	144515099	144515220	144514440	144514524	38484	13,9	0,0	2,0	2,1	198	99	6.13031e-05	0.00338187	1.0,1.0	0.333,0.0	0.834
40608	ENSMUSG00000036833.16	Pnpla7	chr2	+	24983489	24983653	24983489	24983649	24987113	24987199	40608	2,2	0,0	1,0	2,4	103	99	3.66785e-10	8.64724e-08	1.0,1.0	0.325,0.0	0.838
10052	ENSMUSG00000021241.7	Isca2	chr12	+	84773250	84773339	84773250	84773295	84773574	84774336	10052	1,2	0,0	2,0	4,3	143	99	2.9241e-10	7.02145e-08	1.0,1.0	0.257,0.0	0.871
23189	ENSMUSG00000070814.15	Zswim9	chr7	-	13269334	13269647	13269537	13269647	13260899	13261640	23189	7,13	0,0	2,0	3,1	198	99	3.2423e-07	3.76495e-05	1.0,1.0	0.25,0.0	0.875
7142	ENSMUSG00000038009.7	Dnajc22	chr15	+	99099128	99099619	99099128	99099484	99100822	99101775	7142	1,2	0,0	0,1	9,7	198	99	2.29034e-09	4.43256e-07	1.0,1.0	0.0,0.067	0.967
5355	ENSMUSG00000034445.8	Cyb561a3	chr19	+	10577171	10577483	10577171	10577257	10577733	10578083	5355	2,4	0,0	0,0	2,1	198	99	1.1442e-09	2.44557e-07	1.0,1.0	0.0,0.0	1
9404	ENSMUSG00000038991.17	Txndc5	chr13	-	38527773	38527914	38527799	38527914	38523328	38523478	9404	3,2	0,0	0,0	1,2	125	99	1.63914e-09	3.26988e-07	1.0,1.0	0.0,0.0	1
11752	ENSMUSG00000045374.18	Wdr81	chr11	-	75447830	75448029	75447834	75448029	75445403	75446093	11752	2,3	0,0	0,0	1,1	103	99	2.95608e-09	5.50199e-07	1.0,1.0	0.0,0.0	1
17015	ENSMUSG00000000568.15	Hnrnpd	chr5	-	99974762	99975248	99975171	99975248	99967307	99967387	17015	1,1	0,0	0,0	1,2	198	99	5.94589e-09	1.02798e-06	1.0,1.0	0.0,0.0	1
23698	ENSMUSG00000034432.11	Cops8	chr1	+	90610860	90611280	90610860	90611164	90611539	90611587	23698	2,1	0,0	0,0	1,3	198	99	1.32944e-09	2.73626e-07	1.0,1.0	0.0,0.0	1
25165	ENSMUSG00000041997.16	Tlk1	chr2	-	70784715	70784810	70784725	70784810	70770003	70770075	25165	1,1	0,0	0,0	1,1	109	99	2.21755e-08	3.27276e-06	1.0,1.0	0.0,0.0	1
26619	ENSMUSG00000026341.16	Actr3	chr1	-	125435625	125435707	125435630	125435707	125435284	125435457	26619	2,7	0,0	0,0	1,1	104	99	2.24064e-09	4.35805e-07	1.0,1.0	0.0,0.0	1
27980	ENSMUSG00000043051.17	Disc1	chr8	+	125261014	125261369	125261014	125261149	125261595	125261858	27980	2,1	0,0	0,0	1,1	198	99	1.17288e-08	1.81773e-06	1.0,1.0	0.0,0.0	1
38833	ENSMUSG00000031557.16	Plekha2	chr8	-	25101491	25101771	25101640	25101771	25088341	25088505	38833	11,7	0,0	0,0	3,2	198	99	1.82077e-12	7.61589e-10	1.0,1.0	0.0,0.0	1
39286	ENSMUSG00000019428.16	Fkbp8	chr8	+	70527723	70527954	70527723	70527728	70529390	70530598	39286	3,1	0,0	0,0	2,1	198	99	2.59669e-09	4.92739e-07	1.0,1.0	0.0,0.0	1
42192	ENSMUSG00000019818.15	Cd164	chr10	+	41520043	41520384	41520043	41520151	41521917	41522007	42192	1,1	0,0	0,0	1,3	198	99	7.86416e-09	1.31294e-06	1.0,1.0	0.0,0.0	1

## Sheet: MXE
ID	GeneID	geneSymbol	chr	strand	X1stExonStart_0base	X1stExonEnd	X2ndExonStart_0base	X2ndExonEnd	upstreamES	upstreamEE	downstreamES	downstreamEE	ID.1	IJC_SAMPLE_1	SJC_SAMPLE_1	IJC_SAMPLE_2	SJC_SAMPLE_2	IncFormLen	SkipFormLen	PValue	FDR	IncLevel1	IncLevel2	IncLevelDifference
8292	ENSMUSG00000044533.15	Rps2	chr17	+	24720943	24721142	24721229	24721306	24720533	24720731	24721622	24721727	8292	0,0	7,2	2,10	0,0	198	176	2.15494e-13	5.81538e-10	0.0,0.0	1.0,1.0	-1
12468	ENSMUSG00000028552.13	Eps15	chr4	+	109298035	109298118	109298785	109298909	109297186	109297228	109304750	109304840	12468	0,0	4,2	2,1	0,0	182	198	7.80481e-10	5.97415e-07	0.0,0.0	1.0,1.0	-1
12804	ENSMUSG00000000568.15	Hnrnpd	chr5	-	99972894	99972991	99975171	99975248	99967307	99967387	99976533	99976590	12804	0,0	1,2	3,3	0,0	176	196	5.88087e-10	5.29008e-07	0.0,0.0	1.0,1.0	-1
12805	ENSMUSG00000000568.15	Hnrnpd	chr5	-	99972894	99972991	99975909	99975982	99967307	99967387	99976533	99976590	12805	0,0	1,2	1,1	0,0	172	196	1.17033e-08	4.43267e-06	0.0,0.0	1.0,1.0	-1
13087	ENSMUSG00000038398.8	Upf3a	chr8	+	13789291	13789422	13789927	13789967	13787364	13787471	13791881	13791980	13087	0,0	4,1	1,1	0,0	198	139	4.86854e-09	2.28493e-06	0.0,0.0	1.0,1.0	-1
13464	ENSMUSG00000032640.10	Chsy1	chr7	+	66126075	66126233	66162680	66162778	66125241	66125737	66170831	66173798	13464	0,0	1,2	3,2	0,0	198	197	1.38486e-09	9.64442e-07	0.0,0.0	1.0,1.0	-1
13959	ENSMUSG00000041966.18	Dcaf17	chr2	+	71057052	71057153	71057557	71057664	71056494	71056598	71060352	71060443	13959	0,0	1,3	2,1	0,0	198	198	2.75158e-09	1.55445e-06	0.0,0.0	1.0,1.0	-1
15073	ENSMUSG00000032712.16	Resf1	chr6	+	149319905	149320008	149324735	149324795	149317634	149317708	149325404	149329784	15073	0,0	1,3	2,1	0,0	198	159	2.37764e-09	1.50973e-06	0.0,0.0	1.0,1.0	-1
16551	ENSMUSG00000035642.16	Aamdc	chr7	-	97577241	97577364	97578592	97579032	97575587	97575691	97579365	97579497	16551	0,0	2,1	2,2	0,0	198	198	2.74465e-09	1.55445e-06	0.0,0.0	1.0,1.0	-1
19145	ENSMUSG00000025862.14	Stag2	chrX	+	42171675	42171775	42196448	42196555	42151013	42151088	42201854	42201994	19145	0,0	1,4	1,1	0,0	198	198	2.80807e-09	1.55445e-06	0.0,0.0	1.0,1.0	-1
19255	ENSMUSG00000041264.16	Uspl1	chr5	+	149200588	149200692	149200851	149200919	149198644	149198758	149201759	149201889	19255	0,0	2,2	1,5	0,0	198	167	3.93488e-10	4.36263e-07	0.0,0.0	1.0,1.0	-1
20799	ENSMUSG00000058761.5	Rnf169	chr7	-	99943625	99943748	99947381	99947494	99942958	99943105	99955466	99955540	20799	0,0	1,2	2,2	0,0	198	198	2.74465e-09	1.55445e-06	0.0,0.0	1.0,1.0	-1
20937	ENSMUSG00000074802.11	Gas2l3	chr10	-	89437557	89437660	89442158	89442410	89436502	89436609	89443854	89443967	20937	0,0	7,4	3,1	0,0	198	198	8.55498e-11	1.67903e-07	0.0,0.0	1.0,1.0	-1
21140	ENSMUSG00000039219.18	Arid4b	chr13	+	14130175	14130213	14131369	14131475	14129174	14129265	14132435	14132515	21140	0,0	1,2	1,2	0,0	137	198	4.9955e-09	2.29463e-06	0.0,0.0	1.0,1.0	-1
21857	ENSMUSG00000007908.14	Hmgcll1	chr9	+	76114887	76114929	76128921	76129063	76084302	76084491	76130311	76130437	21857	0,0	1,1	2,1	0,0	141	198	8.76186e-09	3.78319e-06	0.0,0.0	1.0,1.0	-1
14774	ENSMUSG00000040025.17	Ythdf2	chr4	-	132190585	132190692	132203585	132203648	132186749	132186947	132204131	132205715	14774	1,0	9,3	2,1	0,0	162	198	2.06696e-10	3.1874e-07	0.12,0.0	1.0,1.0	-0.94
9449	ENSMUSG00000068184.7	Ndufaf2	chr13	-	108123106	108123202	108157436	108157501	108091533	108091623	108158442	108158623	9449	0,0	4,2	1,3	0,1	164	195	8.12508e-08	2.27808e-05	0.0,0.0	1.0,0.781	-0.891
14697	ENSMUSG00000022771.17	Ppil2	chr16	-	17107178	17107254	17107288	17107443	17100255	17100307	17109644	17109694	14697	0,1	1,3	5,1	0,0	198	175	1.06238e-07	2.86696e-05	0.0,0.228	1.0,1.0	-0.886
9672	ENSMUSG00000046876.16	Atxn1	chr13	-	45825261	45825447	45840019	45840137	45795542	45795637	45852327	45852456	9672	0,0	2,1	8,3	3,0	198	198	1.00995e-08	4.11392e-06	0.0,0.0	0.727,1.0	-0.863
8298	ENSMUSG00000044533.15	Rps2	chr17	+	24720957	24721142	24721229	24721306	24720533	24720731	24721622	24721727	8298	3,0	7,2	1,1	0,0	198	176	9.25879e-09	3.91937e-06	0.276,0.0	1.0,1.0	-0.862
10992	ENSMUSG00000020319.9	Wdpcp	chr11	+	21636377	21636542	21646304	21646381	21572304	21572370	21648069	21648123	10992	0,0	7,1	7,5	0,2	198	176	3.56702e-10	4.27825e-07	0.0,0.0	1.0,0.69	-0.845
9666	ENSMUSG00000086889.1	Phf2os1	chr13	+	48871502	48871681	48872851	48873255	48871111	48871203	48875233	48875460	9666	0,1	3,2	2,2	0,0	198	198	3.56797e-09	1.79137e-06	0.0,0.333	1.0,1.0	-0.834
18551	ENSMUSG00000038014.7	Fam120a	chr13	-	48887921	48888072	48888798	48888926	48885736	48885878	48889123	48889261	18551	0,1	1,2	1,1	0,0	198	198	2.08611e-05	0.00171243	0.0,0.333	1.0,1.0	-0.834
22136	ENSMUSG00000027132.3	Katnbl1	chr2	+	112381339	112381480	112397633	112397749	112379225	112379357	112404160	112404276	22136	0,0	3,2	6,2	4,0	198	198	1.73799e-07	4.41428e-05	0.0,0.0	0.6,1.0	-0.8
22210	ENSMUSG00000016933.17	Plcg1	chr2	+	160741048	160741140	160747049	160747117	160731732	160732033	160747774	160747927	22210	2,2	10,5	6,1	0,0	191	167	6.31054e-09	2.78037e-06	0.149,0.259	1.0,1.0	-0.796
8293	ENSMUSG00000044533.15	Rps2	chr17	+	24720943	24721142	24721229	24721487	24720533	24720731	24721622	24721727	8293	0,0	4,3	2,10	1,1	198	198	2.71787e-10	3.54767e-07	0.0,0.0	0.667,0.909	-0.788
12797	ENSMUSG00000000568.15	Hnrnpd	chr5	-	99970223	99970284	99975171	99975248	99967307	99967387	99976533	99976590	12797	0,0	1,1	3,3	0,2	176	160	8.67786e-08	2.40188e-05	0.0,0.0	1.0,0.577	-0.788
22456	ENSMUSG00000019978.16	Epb41l2	chr10	+	25519454	25519550	25521588	25521648	25512972	25513081	25522296	25523519	22456	2,1	6,3	4,2	0,0	195	159	7.38145e-08	2.09682e-05	0.214,0.214	1.0,1.0	-0.786
21218	ENSMUSG00000031508.14	Ankrd10	chr8	-	11620769	11620901	11623774	11623910	11619258	11619297	11628438	11628530	21218	1,1	4,3	1,1	0,0	198	198	9.38866e-07	0.00016891	0.2,0.25	1.0,1.0	-0.775
17819	ENSMUSG00000057110.15	Cntrl	chr2	+	35158231	35158301	35158944	35159050	35157595	35157788	35160247	35160378	17819	0,0	4,1	1,2	1,0	169	198	1.2484e-05	0.00114155	0.0,0.0	0.54,1.0	-0.77
20541	ENSMUSG00000030498.15	Gas2	chr7	+	51965582	51965636	51992876	51993010	51953193	51953301	51993290	51994975	20541	0,0	3,1	6,7	7,0	153	198	7.37894e-08	2.09682e-05	0.0,0.0	0.526,1.0	-0.763
20510	ENSMUSG00000036199.9	Ndufa13	chr8	-	69895406	69895525	69901210	69901410	69895241	69895320	69901541	69901732	20510	0,1	3,1	2,1	0,0	198	198	5.53437e-07	0.00010862	0.0,0.5	1.0,1.0	-0.75
20948	ENSMUSG00000030759.16	Far1	chr7	+	113528204	113528276	113538826	113538873	113525987	113526038	113539272	113539466	20948	1,1	2,3	7,1	0,0	171	146	1.04959e-06	0.000182739	0.299,0.222	1.0,1.0	-0.74
20538	ENSMUSG00000030498.15	Gas2	chr7	+	51965579	51965636	51992876	51993010	51953193	51953301	51993290	51994975	20538	0,0	3,1	5,10	7,0	156	198	6.74703e-08	1.9684e-05	0.0,0.0	0.476,1.0	-0.738
14545	ENSMUSG00000031357.3	Syap1	chrX	-	162866188	162866236	162870923	162871070	162863059	162863208	162872514	162872654	14545	0,3	2,2	2,1	0,0	198	147	2.59016e-05	0.00200427	0.0,0.527	1.0,1.0	-0.736
10852	ENSMUSG00000052298.12	Cdc42se2	chr11	-	54756695	54756846	54779212	54779308	54756405	54756559	54787559	54787675	10852	1,0	2,2	4,3	1,0	195	198	1.98624e-06	0.00030412	0.337,0.0	0.802,1.0	-0.733
16830	ENSMUSG00000053332.13	Gas5	chr1	+	161035760	161036244	161036819	161037103	161035187	161035194	161037287	161037547	16830	0,0	10,5	5,10	3,2	198	198	8.02494e-10	5.97415e-07	0.0,0.0	0.625,0.833	-0.729
16877	ENSMUSG00000053332.13	Gas5	chr1	+	161035995	161036244	161036819	161037103	161035751	161035804	161037287	161037547	16877	0,0	10,8	5,10	3,2	198	198	2.75807e-10	3.54767e-07	0.0,0.0	0.625,0.833	-0.729
18480	ENSMUSG00000031629.14	Cenpu	chr8	+	46556299	46556400	46559022	46559099	46556081	46556193	46559868	46559971	18480	0,0	4,2	6,5	3,1	198	176	3.16741e-08	1.00561e-05	0.0,0.0	0.64,0.816	-0.728
10604	ENSMUSG00000018697.14	Aatf	chr11	-	84457702	84457892	84466763	84467171	84449119	84449187	84467460	84467544	10604	0,0	2,4	1,3	0,4	198	198	0.00105901	0.0298861	0.0,0.0	1.0,0.429	-0.715
11320	ENSMUSG00000074781.5	Ube2n	chr10	+	95519115	95519372	95522072	95522151	95515184	95515237	95541204	95541822	11320	1,0	2,1	1,6	0,2	198	178	0.000151312	0.00769454	0.31,0.0	1.0,0.73	-0.71
8879	ENSMUSG00000010830.8	Kdelr3	chr15	+	79524834	79524962	79525666	79525905	79522810	79522911	79527071	79527739	8879	1,1	3,2	2,2	0,0	198	198	2.90248e-06	0.000403398	0.25,0.333	1.0,1.0	-0.709
14464	ENSMUSG00000022307.16	Oxr1	chr15	+	41813580	41813726	41817081	41817204	41801581	41801695	41819838	41820578	14464	2,3	7,5	4,2	0,0	198	198	5.24786e-08	1.61852e-05	0.222,0.375	1.0,1.0	-0.702
11559	ENSMUSG00000049606.16	Zfp644	chr5	-	106641497	106641630	106655018	106655120	106638426	106638635	106666784	106666845	11559	0,0	10,6	3,2	0,3	198	198	4.6381e-06	0.000568931	0.0,0.0	1.0,0.4	-0.7
14418	ENSMUSG00000034586.14	Hid1	chr11	-	115360345	115360492	115361638	115361844	115359694	115359808	115367543	115367756	14418	2,0	8,7	2,3	0,2	198	198	0.000142413	0.00737764	0.2,0.0	1.0,0.6	-0.7
17946	ENSMUSG00000026566.15	Mpzl1	chr1	-	165612397	165612496	165620631	165620728	165608437	165608604	165634302	165634538	17946	6,0	4,1	1,2	0,0	196	198	0.000543718	0.019149	0.602,0.0	1.0,1.0	-0.699
9528	ENSMUSG00000112964.1	E430024I08Rik	chr13	-	74455591	74455756	74461401	74461566	74450235	74450362	74462581	74462719	9528	2,0	5,4	2,2	0,1	198	198	2.86133e-05	0.0021599	0.286,0.0	1.0,0.667	-0.691
9529	ENSMUSG00000112964.1	E430024I08Rik	chr13	-	74455591	74455756	74461401	74461745	74450235	74450362	74462581	74462719	9529	2,0	5,4	4,2	0,1	198	198	5.24814e-06	0.000619137	0.286,0.0	1.0,0.667	-0.691
14529	ENSMUSG00000027593.15	Raly	chr2	+	154851327	154851491	154851911	154852012	154821006	154821089	154857268	154857533	14529	4,0	10,1	2,3	1,0	198	198	0.000102397	0.0058483	0.286,0.0	0.667,1.0	-0.691
19732	ENSMUSG00000030074.9	Gxylt2	chr6	+	100794378	100794544	100796559	100796653	100787210	100787334	100798100	100798273	19732	0,5	2,3	5,3	0,0	198	193	3.39922e-05	0.00247925	0.0,0.619	1.0,1.0	-0.691
18993	ENSMUSG00000029446.14	Psph	chr5	-	129786146	129786381	129786590	129786660	129779380	129779444	129786954	129787449	18993	0,0	2,2	2,1	0,2	169	198	0.000717618	0.0229861	0.0,0.0	1.0,0.369	-0.684
11214	ENSMUSG00000037058.16	Paip2	chr18	+	35605613	35605678	35609256	35609328	35598648	35598759	35610870	35611034	11214	2,0	4,4	7,2	3,0	164	171	0.000583523	0.020161	0.343,0.0	0.709,1.0	-0.683
15913	ENSMUSG00000031862.11	Atp13a1	chr8	+	69798391	69798513	69798560	69798721	69797940	69797996	69799320	69799478	15913	3,4	6,9	4,3	0,0	198	198	1.38784e-07	3.60988e-05	0.333,0.308	1.0,1.0	-0.679
11600	ENSMUSG00000049606.16	Zfp644	chr5	-	106681903	106682013	106690670	106690873	106666784	106666845	106695642	106695699	11600	4,1	16,4	6,2	2,0	198	198	6.17711e-05	0.00387667	0.2,0.2	0.75,1.0	-0.675
21985	ENSMUSG00000021273.11	Fdft1	chr14	-	63156543	63156750	63159017	63159355	63152326	63152503	63163301	63163485	21985	0,1	1,2	1,2	0,1	198	198	2.0954e-05	0.00171355	0.0,0.333	1.0,0.667	-0.667
12967	ENSMUSG00000029238.11	Clock	chr5	-	76268406	76268847	76269414	76269554	76266799	76266889	76273958	76274043	12967	1,0	13,1	7,5	2,3	198	198	3.61835e-07	7.97107e-05	0.071,0.0	0.778,0.625	-0.666
12968	ENSMUSG00000029238.11	Clock	chr5	-	76268415	76268847	76269414	76269554	76266799	76266889	76273958	76274043	12968	1,0	13,1	7,5	2,3	198	198	3.61835e-07	7.97107e-05	0.071,0.0	0.778,0.625	-0.666
15251	ENSMUSG00000039046.15	Usp6nl	chr2	+	6330963	6331096	6334603	6334774	6322771	6322954	6336367	6336459	15251	2,0	1,3	2,1	0,0	198	198	6.01202e-05	0.00379513	0.667,0.0	1.0,1.0	-0.666
20695	ENSMUSG00000033184.14	Tmed7	chr18	-	46590055	46590486	46591351	46591452	46588560	46588688	46593248	46593494	20695	2,0	1,2	3,2	0,0	198	198	0.00144914	0.0374229	0.667,0.0	1.0,1.0	-0.666
13873	ENSMUSG00000039286.12	Fndc3b	chr3	-	27625605	27625705	27630205	27630310	27620604	27620680	27642950	27643089	13873	2,1	3,13	16,6	1,1	198	198	1.2422e-07	3.27047e-05	0.4,0.071	0.941,0.857	-0.663
16882	ENSMUSG00000053332.13	Gas5	chr1	+	161035995	161036244	161036819	161036856	161035751	161035804	161037504	161038037	16882	3,0	1,4	2,3	0,0	198	136	3.57778e-06	0.000468125	0.673,0.0	1.0,1.0	-0.663
14310	ENSMUSG00000039987.15	Phtf2	chr5	-	20840362	20840415	20853123	20853152	20813239	20813296	20855121	20855201	14310	0,0	1,1	1,3	1,1	128	152	9.84882e-06	0.000988958	0.0,0.0	0.543,0.781	-0.662
22442	ENSMUSG00000073236.4	2500004C02Rik	chr2	-	153345117	153345178	153345345	153345755	153342634	153342864	153345876	153346073	22442	1,0	5,9	3,3	0,3	198	160	4.19217e-05	0.00285504	0.139,0.0	1.0,0.447	-0.654
16223	ENSMUSG00000024983.10	Vti1a	chr19	+	55398842	55398924	55431232	55431294	55381013	55381019	55446177	55446979	16223	1,1	3,1	1,8	0,0	181	161	1.36064e-05	0.00122907	0.229,0.471	1.0,1.0	-0.65
15976	ENSMUSG00000013033.16	Adgrl1	chr8	+	83926258	83926276	83928667	83928895	83923091	83923108	83929463	83930264	15976	2,5	12,9	1,1	0,0	117	198	5.13289e-06	0.000608868	0.22,0.485	1.0,1.0	-0.647
22188	ENSMUSG00000015501.10	Hivep2	chr10	+	14032303	14032489	14066361	14066444	14004200	14004275	14066582	14066684	22188	1,0	4,1	3,1	3,0	198	182	0.00197013	0.0460808	0.187,0.0	0.479,1.0	-0.646
20542	ENSMUSG00000030498.15	Gas2	chr7	+	51965582	51965636	51992876	51993188	51953193	51953301	51993290	51994975	20542	0,0	4,4	6,7	9,2	153	198	3.87211e-07	8.35951e-05	0.0,0.0	0.463,0.819	-0.641
9630	ENSMUSG00000034789.8	Rab24	chr13	-	55320702	55320844	55321101	55321173	55320502	55320553	55321389	55321946	9630	0,0	2,2	5,1	0,3	171	198	5.5696e-06	0.000638928	0.0,0.0	1.0,0.278	-0.639
20539	ENSMUSG00000030498.15	Gas2	chr7	+	51965579	51965636	51992876	51993188	51953193	51953301	51993290	51994975	20539	0,0	4,4	5,10	9,2	156	198	3.77693e-07	8.23637e-05	0.0,0.0	0.414,0.864	-0.639
20947	ENSMUSG00000030759.16	Far1	chr7	+	113528204	113528276	113538383	113538873	113525987	113526038	113539272	113539466	20947	1,1	2,2	7,1	0,0	171	198	3.31586e-05	0.00245941	0.367,0.367	1.0,1.0	-0.633
14419	ENSMUSG00000034586.14	Hid1	chr11	-	115360432	115360492	115361638	115361844	115359694	115359808	115367543	115367756	14419	2,0	4,5	2,3	0,2	198	159	0.00107524	0.0302277	0.286,0.0	1.0,0.546	-0.63
11859	ENSMUSG00000048874.15	Phf3	chr1	-	30842302	30842375	30852895	30852950	30837104	30837266	30862986	30863256	11859	1,0	6,2	7,2	1,2	154	172	1.51116e-05	0.00134257	0.157,0.0	0.887,0.528	-0.629
13872	ENSMUSG00000039286.12	Fndc3b	chr3	-	27625605	27625705	27630165	27630310	27620604	27620680	27642950	27643089	13872	1,1	3,13	10,2	1,1	198	198	1.81747e-07	4.51005e-05	0.25,0.071	0.909,0.667	-0.628
14321	ENSMUSG00000027499.12	Pkia	chr3	+	7386488	7386639	7406713	7406828	7366669	7366752	7437337	7437515	14321	0,0	4,6	5,4	6,1	198	198	3.34485e-07	7.76473e-05	0.0,0.0	0.455,0.8	-0.628
9674	ENSMUSG00000046876.16	Atxn1	chr13	-	45836585	45836681	45840019	45840137	45795542	45795637	45852327	45852456	9674	0,0	3,5	8,3	0,9	198	195	3.03062e-06	0.000411498	0.0,0.0	1.0,0.247	-0.623
9642	ENSMUSG00000034789.8	Rab24	chr13	-	55320778	55320844	55321101	55321173	55320502	55320553	55321389	55321946	9642	0,0	1,1	5,1	0,3	171	165	2.29962e-05	0.00185712	0.0,0.0	1.0,0.243	-0.621
18994	ENSMUSG00000029446.14	Psph	chr5	-	129786238	129786381	129786590	129786660	129779380	129779444	129786954	129787449	18994	0,0	1,3	2,1	1,1	169	198	0.0016821	0.0413138	0.0,0.0	0.701,0.54	-0.621
20537	ENSMUSG00000030498.15	Gas2	chr7	+	51965579	51965636	51967657	51967804	51953193	51953301	51993290	51994975	20537	0,0	8,11	5,10	5,6	156	198	5.5301e-09	2.48728e-06	0.0,0.0	0.559,0.679	-0.619
1682	ENSMUSG00000001036.17	Epn2	chr11	-	61553509	61553579	61565821	61565894	61548007	61548042	61579566	61579658	1682	4,3	13,12	7,2	0,1	172	169	1.74893e-06	0.000273606	0.232,0.197	1.0,0.663	-0.617
8966	ENSMUSG00000097039.8	Pvt1	chr15	+	62166003	62166141	62171623	62171696	62159996	62160128	62175466	62175548	8966	1,1	2,1	5,1	0,0	198	172	0.00186918	0.0443936	0.303,0.465	1.0,1.0	-0.616
13386	ENSMUSG00000029463.5	Fam216a	chr5	-	122367535	122367728	122369516	122369634	122366313	122366396	122370514	122370573	13386	1,0	5,1	3,2	0,3	198	198	0.000294175	0.0126374	0.167,0.0	1.0,0.4	-0.616
12858	ENSMUSG00000005813.12	Metap1	chr3	-	138478292	138478339	138478369	138478427	138474986	138475078	138478869	138478930	12858	1,3	4,2	5,1	0,0	157	146	1.28945e-06	0.000216883	0.189,0.582	1.0,1.0	-0.615
16224	ENSMUSG00000024983.10	Vti1a	chr19	+	55398842	55398924	55431232	55431294	55391783	55391868	55446177	55446979	16224	1,3	2,3	1,5	0,0	181	161	5.59347e-06	0.000638928	0.308,0.471	1.0,1.0	-0.611
16556	ENSMUSG00000026193.15	Fn1	chr1	-	71590775	71590892	71593070	71593231	71590097	71590204	71595663	71595802	16556	0,4	23,18	4,3	1,2	198	198	4.66297e-05	0.0030975	0.0,0.182	0.8,0.6	-0.609
12901	ENSMUSG00000085101.7	Platr16	chr4	+	145446495	145446625	145447904	145448007	145412186	145412280	145449466	145449756	12901	0,1	2,1	4,5	0,2	198	198	0.000167723	0.00822949	0.0,0.5	1.0,0.714	-0.607
12905	ENSMUSG00000085101.7	Platr16	chr4	+	145446495	145446771	145447904	145448007	145412186	145412280	145449466	145449756	12905	0,1	2,1	5,5	0,2	198	198	0.000148706	0.00759042	0.0,0.5	1.0,0.714	-0.607
20540	ENSMUSG00000030498.15	Gas2	chr7	+	51965582	51965636	51967657	51967804	51953193	51953301	51993290	51994975	20540	0,0	8,11	6,7	5,6	153	198	1.59053e-08	5.82e-06	0.0,0.0	0.608,0.602	-0.605
9638	ENSMUSG00000034789.8	Rab24	chr13	-	55320738	55320844	55321101	55321173	55320502	55320553	55321389	55321946	9638	0,0	2,3	5,1	0,5	171	198	4.92186e-05	0.00323957	0.0,0.0	1.0,0.188	-0.594
12368	ENSMUSG00000027423.15	Snx5	chr2	-	144257913	144257993	144259056	144259392	144257099	144257195	144260724	144260835	12368	5,0	1,5	7,9	0,0	198	179	6.44237e-05	0.00402338	0.819,0.0	1.0,1.0	-0.591
18096	ENSMUSG00000027176.8	Cstf3	chr2	+	104637821	104637972	104638030	104638108	104609090	104609186	104644288	104644321	18096	0,1	1,1	2,1	1,0	198	177	0.00169888	0.0414899	0.0,0.472	0.641,1.0	-0.585
9664	ENSMUSG00000086889.1	Phf2os1	chr13	+	48871502	48871681	48872851	48873040	48871111	48871203	48875233	48875460	9664	0,1	1,2	2,2	2,0	198	198	0.0003901	0.0154247	0.0,0.333	0.5,1.0	-0.584
13420	ENSMUSG00000028107.14	Tars2	chr3	-	95749217	95749323	95749870	95749975	95748576	95748633	95750338	95750417	13420	1,0	2,3	3,2	0,2	198	198	0.000109714	0.00613633	0.333,0.0	1.0,0.5	-0.584
19516	ENSMUSG00000032312.7	Csk	chr9	-	57634205	57634257	57644045	57644224	57631366	57631443	57644994	57645653	19516	5,6	9,4	4,5	0,0	198	151	3.58828e-07	7.97107e-05	0.298,0.534	1.0,1.0	-0.584
12366	ENSMUSG00000027423.15	Snx5	chr2	-	144257913	144257993	144259056	144259157	144257099	144257195	144260724	144260835	12366	6,0	1,5	7,8	0,0	198	179	0.000112292	0.00623164	0.844,0.0	1.0,1.0	-0.578
10515	ENSMUSG00000020863.15	Luc7l3	chr11	-	94292926	94293032	94293084	94293273	94292406	94292472	94295919	94296080	10515	10,0	17,7	11,11	4,3	198	198	0.000339271	0.013925	0.37,0.0	0.733,0.786	-0.575
12801	ENSMUSG00000000568.15	Hnrnpd	chr5	-	99970227	99970284	99975171	99975248	99967307	99967387	99976533	99976590	12801	0,0	1,2	3,3	2,2	176	156	1.24597e-05	0.00114155	0.0,0.0	0.571,0.571	-0.571
17617	ENSMUSG00000028096.13	Gpr89	chr3	-	96890891	96890923	96892865	96892967	96889908	96889989	96897332	96897436	17617	0,0	1,2	4,1	0,4	198	131	0.00118406	0.0324398	0.0,0.0	1.0,0.142	-0.571
9735	ENSMUSG00000046351.11	Zfp322a	chr13	-	23358959	23359092	23359247	23359427	23357633	23357713	23362579	23362654	9735	2,3	8,3	7,10	0,2	198	198	4.04213e-05	0.00279697	0.2,0.5	1.0,0.833	-0.567
14699	ENSMUSG00000022771.17	Ppil2	chr16	-	17107178	17107254	17107288	17107777	17100255	17100307	17109644	17109694	14699	2,1	1,3	3,4	0,0	198	175	0.000148722	0.00759042	0.639,0.228	1.0,1.0	-0.567
19359	ENSMUSG00000038836.15	Agbl3	chr6	+	34782110	34782218	34783569	34783593	34780889	34781059	34785190	34785683	19359	0,0	1,2	3,3	2,1	198	123	7.21483e-06	0.000778805	0.0,0.0	0.482,0.651	-0.567
22008	ENSMUSG00000056531.11	Ccdc18	chr5	+	108197136	108197241	108197499	108197607	108195995	108196159	108197756	108197970	22008	2,0	1,4	4,2	1,0	198	198	0.000161225	0.00800159	0.667,0.0	0.8,1.0	-0.567
15616	ENSMUSG00000016833.14	Mrps18c	chr5	+	100799583	100799613	100801911	100802079	100798746	100798860	100803052	100803110	15616	1,1	2,2	4,6	0,0	129	198	8.0406e-05	0.00480855	0.434,0.434	1.0,1.0	-0.566
16876	ENSMUSG00000053332.13	Gas5	chr1	+	161035995	161036244	161036819	161036956	161035751	161035804	161037287	161037547	16876	0,0	3,3	5,10	7,4	198	198	1.56939e-06	0.000252419	0.0,0.0	0.417,0.714	-0.566
12969	ENSMUSG00000029238.11	Clock	chr5	-	76268772	76268847	76269414	76269554	76266799	76266889	76273958	76274043	12969	1,0	15,4	7,5	2,6	198	174	2.12033e-06	0.000322364	0.055,0.0	0.755,0.423	-0.561
8435	ENSMUSG00000116930.1	Gm49711	chr16	+	92059009	92059252	92062430	92062507	92058315	92058480	92099593	92099733	8435	3,1	2,2	2,1	0,0	198	176	0.000228734	0.0105067	0.571,0.308	1.0,1.0	-0.56
8438	ENSMUSG00000116930.1	Gm49711	chr16	+	92059009	92059292	92062430	92062507	92058315	92058480	92099593	92099733	8438	3,1	2,2	1,1	0,0	198	176	0.00022931	0.0105108	0.571,0.308	1.0,1.0	-0.56
9571	ENSMUSG00000074867.4	Zfp808	chr13	+	62130248	62130339	62167415	62167696	62129932	62130028	62169441	62169568	9571	0,0	2,4	6,1	4,1	190	198	1.28454e-06	0.000216883	0.0,0.0	0.61,0.51	-0.56
9796	ENSMUSG00000041886.7	Macc1	chr12	+	119396917	119397064	119413398	119413455	119392582	119392640	119443401	119443524	9796	0,0	4,1	4,1	0,6	198	156	0.00121014	0.0328618	0.0,0.0	1.0,0.116	-0.558
18510	ENSMUSG00000025533.15	Asl	chr5	-	130020054	130020264	130023635	130023733	130019709	130019856	130024041	130025019	18510	0,0	1,1	4,4	9,1	197	198	7.76539e-06	0.000825847	0.0,0.0	0.309,0.801	-0.555
9676	ENSMUSG00000046876.16	Atxn1	chr13	-	45836585	45836754	45840019	45840137	45795542	45795637	45852327	45852456	9676	0,0	2,5	8,3	1,11	198	198	9.09317e-06	0.000943809	0.0,0.0	0.889,0.214	-0.551
15978	ENSMUSG00000013033.16	Adgrl1	chr8	+	83926258	83926276	83928667	83928991	83923091	83923108	83929463	83930264	15978	2,5	9,5	1,1	0,0	117	198	5.4191e-06	0.000628995	0.273,0.629	1.0,1.0	-0.549
10823	ENSMUSG00000020455.16	Trim11	chr11	+	58982728	58982800	58986970	58987054	58981992	58982223	58987632	58987680	10823	0,8	2,6	2,2	1,0	171	183	0.00132673	0.0348877	0.0,0.588	0.682,1.0	-0.547
13798	ENSMUSG00000028405.9	Aco1	chr4	+	40143669	40143840	40146330	40146460	40143080	40143541	40163718	40163845	13798	3,2	4,2	1,4	0,0	198	198	8.02651e-06	0.000849433	0.429,0.5	1.0,1.0	-0.535
17747	ENSMUSG00000028433.14	Ubap2	chr4	-	41211433	41211894	41216565	41216904	41209352	41209569	41218310	41218363	17747	0,1	3,5	5,2	1,3	198	198	0.000159863	0.00797064	0.0,0.167	0.833,0.4	-0.533
18509	ENSMUSG00000025533.15	Asl	chr5	-	130020054	130020114	130023635	130023954	130019709	130019856	130024041	130025019	18509	0,1	2,6	5,7	8,1	198	159	0.000152804	0.00772574	0.0,0.118	0.334,0.849	-0.532
14322	ENSMUSG00000027499.12	Pkia	chr3	+	7386488	7386639	7430650	7430838	7366669	7366752	7437337	7437515	14322	0,0	4,6	5,4	4,4	198	198	1.33232e-06	0.000218502	0.0,0.0	0.556,0.5	-0.528
2462	ENSMUSG00000063245.11	Zfp993	chr4	+	146613509	146613602	146644458	146644504	146610960	146611128	146654898	146654956	2462	17,1	7,4	9,8	0,1	192	145	9.48775e-05	0.00548412	0.647,0.159	1.0,0.858	-0.526
18508	ENSMUSG00000025533.15	Asl	chr5	-	130020054	130020114	130023635	130023733	130019709	130019856	130024041	130025019	18508	0,0	2,6	4,4	8,1	197	159	1.01637e-05	0.00100057	0.0,0.0	0.288,0.764	-0.526
8340	ENSMUSG00000041482.17	Piezo2	chr18	-	63344876	63344982	63370161	63370614	63326566	63326662	63386205	63387183	8340	2,1	4,7	2,1	0,1	198	198	0.000538577	0.01903	0.333,0.125	1.0,0.5	-0.521
21331	ENSMUSG00000037296.7	Lsm1	chr8	+	25786276	25786586	25788066	25788175	25785586	25785717	25792156	25792327	21331	5,0	2,2	3,3	1,0	198	198	0.00216947	0.0495626	0.714,0.0	0.75,1.0	-0.518
11590	ENSMUSG00000049606.16	Zfp644	chr5	-	106681903	106682010	106690670	106690873	106666784	106666845	106695136	106695699	11590	7,2	17,3	5,3	2,0	198	198	0.000725392	0.0231322	0.292,0.4	0.714,1.0	-0.511
18952	ENSMUSG00000049971.17	Glt1d1	chr5	+	127689840	127689880	127690989	127691139	127678090	127678140	127694226	127694325	18952	1,0	5,4	2,2	1,3	139	198	0.0007785	0.0242876	0.222,0.0	0.74,0.487	-0.502
7747	ENSMUSG00000001127.12	Araf	chrX	+	20858745	20858873	20859684	20859861	20858393	20858512	20859978	20860519	7747	2,0	2,3	1,3	1,0	198	198	0.000256808	0.0114238	0.5,0.0	0.5,1.0	-0.5
7749	ENSMUSG00000001127.12	Araf	chrX	+	20858782	20858873	20859684	20859861	20858393	20858512	20859978	20860519	7749	2,0	2,3	1,1	1,0	190	198	0.00214566	0.0492271	0.51,0.0	0.51,1.0	-0.5
8715	ENSMUSG00000001576.15	Ergic1	chr17	+	26631925	26632026	26632197	26632337	26629554	26629679	26634416	26634521	8715	1,0	5,4	2,3	1,3	198	198	0.000449411	0.0170451	0.167,0.0	0.667,0.5	-0.5
9464	ENSMUSG00000021710.11	Nln	chr13	-	104076428	104076596	104078787	104079119	104072762	104073022	104109415	104109614	9464	0,0	8,7	1,4	2,2	198	198	1.82786e-05	0.00154147	0.0,0.0	0.333,0.667	-0.5
11631	ENSMUSG00000038845.11	Phb	chr11	+	95669619	95669720	95669876	95669984	95668036	95668151	95671386	95671642	11631	0,0	12,4	1,3	1,3	198	198	9.11291e-05	0.00528867	0.0,0.0	0.5,0.5	-0.5
12065	ENSMUSG00000026594.14	Ralgps2	chr1	-	156891480	156891640	156898000	156898121	156887946	156888030	156900585	156900636	12065	6,1	3,2	6,5	0,0	198	198	7.25079e-05	0.00442196	0.667,0.333	1.0,1.0	-0.5
12913	ENSMUSG00000085101.7	Platr16	chr4	+	145446560	145446771	145447904	145448007	145412186	145412280	145449466	145449756	12913	0,1	2,1	2,2	0,2	198	198	0.000619536	0.0210301	0.0,0.5	1.0,0.5	-0.5
13418	ENSMUSG00000028107.14	Tars2	chr3	-	95749217	95749308	95749870	95749975	95748576	95748633	95750338	95750417	13418	1,0	1,2	3,2	0,2	198	190	0.000401846	0.0157164	0.49,0.0	1.0,0.49	-0.5
17544	ENSMUSG00000029439.14	Sfswap	chr5	+	129502479	129502865	129503457	129503608	129501448	129501596	129503982	129504152	17544	4,1	4,1	4,1	0,0	198	198	6.6945e-05	0.00415309	0.5,0.5	1.0,1.0	-0.5
17817	ENSMUSG00000057110.15	Cntrl	chr2	+	35158225	35158301	35158944	35159050	35157595	35157788	35160247	35160378	17817	0,1	4,1	1,3	1,0	175	198	1.12105e-05	0.00106151	0.0,0.531	0.531,1.0	-0.5
20694	ENSMUSG00000033184.14	Tmed7	chr18	-	46590055	46590446	46591351	46591452	46588560	46588688	46593248	46593494	20694	2,0	1,2	3,2	0,1	198	198	0.00161597	0.040239	0.667,0.0	1.0,0.667	-0.5
21020	ENSMUSG00000030844.11	Rgs10	chr7	-	128410331	128410718	128412191	128412293	128404358	128404477	128418065	128418173	21020	1,2	1,2	1,2	0,0	198	198	0.000836389	0.0254321	0.5,0.5	1.0,1.0	-0.5
21325	ENSMUSG00000037296.7	Lsm1	chr8	+	25786276	25786297	25788066	25788175	25785586	25785717	25792156	25792327	21325	0,0	2,2	0,2	1,0	120	198	0.00213348	0.0489996	0.0,0.0	0.0,1.0	-0.5
17738	ENSMUSG00000028779.16	Pef1	chr4	+	130102935	130103274	130106319	130106526	130102557	130102727	130107362	130107650	17738	0,1	7,3	8,4	4,3	198	198	1.96345e-05	0.00163034	0.0,0.25	0.667,0.571	-0.494
21158	ENSMUSG00000037519.17	Ppfia1	chr7	-	144514871	144514946	144515099	144515220	144514440	144514524	144515985	144516120	21158	0,0	21,16	3,2	5,1	198	174	6.82377e-05	0.00419591	0.0,0.0	0.345,0.637	-0.491
14794	ENSMUSG00000035439.13	Haus8	chr8	-	71270155	71270245	71271244	71271312	71269225	71269284	71272283	71272934	14794	4,3	5,10	2,6	1,0	167	189	3.81983e-05	0.00266881	0.475,0.253	0.694,1.0	-0.483
9634	ENSMUSG00000034789.8	Rab24	chr13	-	55320730	55320844	55321101	55321173	55320502	55320553	55321389	55321946	9634	0,0	2,2	5,1	4,2	171	198	4.04627e-06	0.000510848	0.0,0.0	0.591,0.367	-0.479
22489	ENSMUSG00000026355.11	Mcm6	chr1	-	128351594	128351682	128353459	128353673	128349303	128349469	128355512	128355659	22489	1,7	4,1	11,1	0,0	198	187	0.00052446	0.0188082	0.191,0.869	1.0,1.0	-0.47
15981	ENSMUSG00000013033.16	Adgrl1	chr8	+	83926261	83926276	83928667	83928895	83924205	83924355	83929463	83930264	15981	3,6	7,6	1,1	0,0	114	198	1.77081e-05	0.0015292	0.427,0.635	1.0,1.0	-0.469
19208	ENSMUSG00000029642.11	Polr1d	chr5	+	147079087	147079165	147094456	147094659	147077563	147077693	147101228	147101303	19208	0,1	2,5	2,2	3,1	177	198	0.0017481	0.0424167	0.0,0.183	0.427,0.691	-0.467
8876	ENSMUSG00000010830.8	Kdelr3	chr15	+	79524785	79524962	79525666	79525905	79522810	79522911	79527071	79527739	8876	2,4	3,2	2,4	0,0	198	198	3.76436e-05	0.00265696	0.4,0.667	1.0,1.0	-0.466
11058	ENSMUSG00000041961.14	Znrf3	chr11	-	5317546	5317699	5329878	5330004	5289662	5289737	5338637	5338763	11058	3,3	2,10	18,13	1,3	198	198	0.000323268	0.0135062	0.6,0.231	0.947,0.812	-0.464
22265	ENSMUSG00000028788.14	Ptp4a2	chr4	+	129833579	129833713	129838386	129838402	129820707	129820799	129838977	129839678	22265	4,2	2,1	1,2	0,0	198	115	0.000995731	0.0285104	0.537,0.537	1.0,1.0	-0.463
9665	ENSMUSG00000086889.1	Phf2os1	chr13	+	48871502	48871681	48872851	48873062	48871111	48871203	48875233	48875460	9665	0,1	3,3	2,2	1,2	198	198	0.00131356	0.0347271	0.0,0.25	0.667,0.5	-0.459
20940	ENSMUSG00000074802.11	Gas2l3	chr10	-	89437557	89437660	89443592	89443745	89436502	89436609	89443854	89443967	20940	8,5	7,4	1,2	0,0	198	198	1.91479e-05	0.00159608	0.533,0.556	1.0,1.0	-0.456
3840	ENSMUSG00000070814.15	Zswim9	chr7	-	13269334	13269647	13277145	13277428	13260899	13261640	13278643	13278721	3840	14,10	10,13	24,8	2,0	198	198	8.59282e-07	0.000157212	0.583,0.435	0.923,1.0	-0.453
15193	ENSMUSG00000070814.15	Zswim9	chr7	-	13269334	13269647	13277099	13277428	13260899	13261640	13278643	13278721	15193	14,10	10,13	23,7	2,0	198	198	1.57842e-06	0.000252419	0.583,0.435	0.92,1.0	-0.451
14465	ENSMUSG00000022307.16	Oxr1	chr15	+	41813580	41813726	41817081	41817270	41801581	41801695	41819838	41820578	14465	2,3	3,3	4,2	1,0	198	198	0.000605363	0.0207118	0.4,0.5	0.8,1.0	-0.45
16406	ENSMUSG00000032349.13	Elovl5	chr9	+	77921875	77922040	77948428	77948560	77917433	77917526	77957140	77957732	16406	6,4	4,4	1,2	0,0	198	198	1.09244e-05	0.0010482	0.6,0.5	1.0,1.0	-0.45
18924	ENSMUSG00000032038.7	St3gal4	chr9	-	35056418	35056531	35098898	35099162	35055573	35055649	35116697	35116873	18924	2,9	8,8	20,22	3,7	198	198	0.00154626	0.039181	0.2,0.529	0.87,0.759	-0.45
21999	ENSMUSG00000048537.16	Phldb1	chr9	-	44708393	44708519	44710296	44710487	44707884	44708040	44710922	44711060	21999	2,0	18,17	3,2	2,3	198	198	0.000685578	0.0222571	0.1,0.0	0.6,0.4	-0.45
6192	ENSMUSG00000037363.9	Letm2	chr8	-	25585348	25585468	25586606	25586807	25581672	25581786	25587295	25587433	6192	6,4	8,6	6,8	0,3	198	198	0.00202458	0.0470997	0.429,0.4	1.0,0.727	-0.449
13898	ENSMUSG00000044934.13	Zfp367	chr13	-	64150069	64150108	64150895	64151024	64145529	64145680	64152388	64152485	13898	1,0	3,3	6,1	2,1	198	138	0.000189593	0.00907566	0.189,0.0	0.676,0.411	-0.449
17225	ENSMUSG00000059939.13	9430015G10Rik	chr4	+	156116403	156116645	156116715	156116848	156113888	156114001	156117009	156117103	17225	0,0	3,4	4,5	4,8	198	198	5.39153e-06	0.000628995	0.0,0.0	0.5,0.385	-0.443
12033	ENSMUSG00000047221.5	Fam185a	chr5	+	21465999	21466122	21478714	21478977	21459158	21459293	21480331	21482124	12033	4,3	8,6	10,7	3,2	198	198	0.001283	0.0340697	0.333,0.333	0.769,0.778	-0.441
8746	ENSMUSG00000023044.2	Csad	chr15	-	102200697	102200783	102200974	102201082	102188934	102188962	102202443	102202574	8746	8,11	9,13	11,11	0,3	198	185	0.000127951	0.00687146	0.454,0.442	1.0,0.774	-0.439
14308	ENSMUSG00000039987.15	Phtf2	chr5	-	20813377	20813519	20853123	20853152	20813239	20813296	20855121	20855201	14308	0,0	2,3	1,3	3,4	128	198	0.00036153	0.0145417	0.0,0.0	0.34,0.537	-0.439
20598	ENSMUSG00000040268.17	Plekha1	chr7	+	130892517	130892594	130895059	130895203	130892180	130892278	130897324	130897450	20598	3,4	3,3	4,4	0,0	176	198	3.3739e-05	0.00247752	0.529,0.6	1.0,1.0	-0.435
20534	ENSMUSG00000030498.15	Gas2	chr7	+	51965276	51965636	51967657	51967804	51953193	51953301	51993290	51994975	20534	2,0	8,11	4,10	5,6	198	198	6.84126e-05	0.00419591	0.2,0.0	0.444,0.625	-0.434
11366	ENSMUSG00000096856.7	Gm10778	chr10	+	81650638	81650730	81658313	81658425	81649058	81649166	81661997	81662124	11366	0,0	1,12	3,2	2,6	191	198	8.92184e-05	0.00523406	0.0,0.0	0.609,0.257	-0.433
22464	ENSMUSG00000074923.10	Pak6	chr2	+	118696102	118696228	118696228	118696292	118695206	118695341	118696406	118698020	22464	13,4	13,6	9,18	2,2	198	163	0.000142268	0.00737764	0.452,0.354	0.787,0.881	-0.431
15554	ENSMUSG00000029319.8	Coq2	chr5	-	100664774	100664870	100667471	100667504	100663579	100663701	100667891	100668058	15554	0,0	6,2	1,4	6,3	132	195	7.82214e-05	0.00469089	0.0,0.0	0.198,0.663	-0.43
21560	ENSMUSG00000036990.13	Otud4	chr8	+	79650256	79650373	79650829	79650886	79646297	79646348	79651005	79651052	21560	3,6	2,3	8,4	0,0	198	156	0.000106762	0.00601798	0.542,0.612	1.0,1.0	-0.423
13270	ENSMUSG00000020547.5	Bzw2	chr12	-	36100604	36100743	36101340	36101749	36092966	36093089	36104261	36104400	13270	0,1	7,3	5,4	7,2	198	198	0.000229938	0.0105172	0.0,0.25	0.417,0.667	-0.417
8583	ENSMUSG00000022843.17	Clcn2	chr16	-	20709063	20709315	20709569	20709629	20708633	20708767	20709879	20709949	8583	2,5	5,5	4,2	0,1	159	198	0.000368963	0.0148058	0.332,0.555	1.0,0.714	-0.413
8588	ENSMUSG00000022843.17	Clcn2	chr16	-	20709063	20709315	20709573	20709724	20708633	20708767	20709879	20709949	8588	5,7	5,5	6,10	0,1	198	198	3.02642e-05	0.00227657	0.5,0.583	1.0,0.909	-0.413
22114	ENSMUSG00000032294.17	Pkm	chr9	+	59659465	59659576	59663790	59663858	59656597	59656649	59665199	59665367	22114	8,4	2,5	4,1	0,0	198	167	1.62216e-05	0.00142101	0.771,0.403	1.0,1.0	-0.413
11343	ENSMUSG00000020056.16	Washc3	chr10	+	88204629	88204743	88213178	88213291	88201811	88201910	88213646	88213712	11343	1,0	2,1	4,5	5,2	198	198	0.00220669	0.04995	0.333,0.0	0.444,0.714	-0.412
3055	ENSMUSG00000028370.7	Pappa	chr4	+	65180860	65181154	65189262	65189455	65176208	65176354	65196770	65196892	3055	17,16	31,17	6,4	1,1	198	198	0.00113485	0.0314508	0.354,0.485	0.857,0.8	-0.409
18936	ENSMUSG00000032038.7	St3gal4	chr9	-	35116018	35116111	35116275	35116406	35055573	35055649	35116697	35116873	18936	0,0	2,15	4,1	4,2	198	192	4.87778e-05	0.00322038	0.0,0.0	0.492,0.327	-0.409
12539	ENSMUSG00000040028.10	Elavl1	chr8	-	4321071	4321270	4322702	4322832	4311598	4311786	4324885	4325413	12539	4,22	8,10	10,6	2,0	198	198	0.00138597	0.0361373	0.333,0.688	0.833,1.0	-0.406
15877	ENSMUSG00000098090.8	2700099C18Rik	chr17	+	94756695	94756789	94759632	94759694	94756433	94756523	94761497	94761604	15877	2,1	3,1	2,6	1,0	193	161	0.000679102	0.0222129	0.357,0.455	0.625,1.0	-0.406
21812	ENSMUSG00000031987.6	Egln1	chr8	-	124917806	124917938	124941660	124941777	124915660	124915780	124948232	124949324	21812	9,3	2,5	2,4	0,0	198	198	4.40114e-05	0.00296926	0.818,0.375	1.0,1.0	-0.403
13635	ENSMUSG00000041977.18	Arhgef11	chr3	+	87660541	87660691	87681859	87681892	87618760	87618792	87683485	87683577	13635	3,4	8,1	4,4	1,0	198	132	0.000751917	0.023698	0.2,0.727	0.727,1.0	-0.4
22368	ENSMUSG00000054836.12	Elp6	chr9	+	110309054	110309202	110309784	110309987	110305239	110305349	110310094	110310173	22368	3,3	2,2	3,5	0,0	198	198	0.000512501	0.0184714	0.6,0.6	1.0,1.0	-0.4
21351	ENSMUSG00000036501.7	Fam13b	chr18	-	34464214	34464336	34464482	34464560	34462960	34463009	34465155	34465220	21351	1,1	10,14	5,4	4,7	177	198	0.000533972	0.0189569	0.101,0.074	0.583,0.39	-0.399
15529	ENSMUSG00000029319.8	Coq2	chr5	-	100663317	100663693	100666067	100666161	100661865	100661922	100667891	100668058	15529	1,0	1,2	9,7	3,6	193	198	0.00190688	0.0450411	0.506,0.0	0.755,0.545	-0.397
20028	ENSMUSG00000012848.15	Rps5	chr7	+	12925712	12925865	12926395	12926498	12925391	12925601	12926571	12926686	20028	0,0	2,4	2,5	2,12	198	198	3.75543e-05	0.00265696	0.0,0.0	0.5,0.294	-0.397
14491	ENSMUSG00000055296.14	Tmem245	chr4	-	56903211	56903247	56903353	56903523	56899305	56899428	56903917	56904049	14491	1,0	4,3	4,3	1,8	198	135	0.00175399	0.0424993	0.146,0.0	0.732,0.204	-0.395
22178	ENSMUSG00000007815.13	Rhoa	chr9	+	108318397	108318590	108326518	108326617	108315307	108315382	108327583	108327741	22178	1,0	10,9	3,4	11,2	198	198	0.000409449	0.0159418	0.091,0.0	0.214,0.667	-0.395
10801	ENSMUSG00000062115.15	Rai1	chr11	+	60140654	60140882	60150673	60150950	60140258	60140370	60185095	60192025	10801	2,5	2,2	4,1	0,0	198	198	0.00158301	0.0395551	0.5,0.714	1.0,1.0	-0.393
20575	ENSMUSG00000087159.7	Gm15246	chrX	+	169323004	169323101	169330697	169330779	169322749	169322842	169360986	169361095	20575	0,0	5,4	1,6	6,3	196	181	8.23935e-05	0.00490026	0.0,0.0	0.133,0.649	-0.391
10270	ENSMUSG00000020594.14	Pum2	chr12	+	8678359	8678524	8692417	8692609	8678169	8678231	8698090	8698159	10270	1,0	13,11	9,6	10,10	198	198	2.22924e-06	0.000331077	0.071,0.0	0.474,0.375	-0.389
11365	ENSMUSG00000096856.7	Gm10778	chr10	+	81650638	81650730	81658310	81658425	81649058	81649166	81661997	81662124	11365	0,0	1,4	3,2	4,4	191	198	0.000148567	0.00759042	0.0,0.0	0.437,0.341	-0.389
20599	ENSMUSG00000040268.17	Plekha1	chr7	+	130892517	130892594	130895059	130895519	130892180	130892278	130897324	130897450	20599	3,4	3,2	4,4	0,0	176	198	0.000112573	0.00623164	0.529,0.692	1.0,1.0	-0.389
22110	ENSMUSG00000032294.17	Pkm	chr9	+	59659445	59659576	59663790	59663858	59656597	59656649	59665199	59665367	22110	11,4	2,5	2,1	0,0	198	167	4.61565e-05	0.00309171	0.823,0.403	1.0,1.0	-0.387
8777	ENSMUSG00000022996.15	Wnt10b	chr15	-	98775372	98775554	98775662	98776155	98774411	98774497	98776517	98776780	8777	0,0	2,2	1,4	4,3	198	198	0.000131509	0.0069691	0.0,0.0	0.2,0.571	-0.385
18482	ENSMUSG00000031629.14	Cenpu	chr8	+	46556302	46556400	46559022	46559099	46556081	46556193	46559868	46559971	18482	1,0	4,2	3,1	3,1	197	176	0.00181925	0.043543	0.183,0.0	0.472,0.472	-0.38
22487	ENSMUSG00000026355.11	Mcm6	chr1	-	128351594	128351682	128353459	128353568	128349303	128349469	128355512	128355659	22487	3,5	4,1	11,1	0,0	198	187	0.000177936	0.00861312	0.415,0.825	1.0,1.0	-0.38
17521	ENSMUSG00000045838.8	Ccdc9b	chr2	-	118760584	118760749	118761288	118761465	118760320	118760449	118761644	118761758	17521	5,9	4,4	2,1	0,0	198	198	2.33119e-05	0.00185712	0.556,0.692	1.0,1.0	-0.376
17524	ENSMUSG00000045838.8	Ccdc9b	chr2	-	118760584	118760909	118761288	118761465	118760320	118760449	118761644	118761758	17524	5,9	4,4	2,1	0,0	198	198	2.33119e-05	0.00185712	0.556,0.692	1.0,1.0	-0.376
18741	ENSMUSG00000021606.8	Ndufs6	chr13	-	73320286	73320385	73327415	73327487	73319878	73320060	73328338	73328542	18741	2,3	2,3	6,4	0,1	171	198	0.000654521	0.0217058	0.537,0.537	1.0,0.822	-0.374
15875	ENSMUSG00000098090.8	2700099C18Rik	chr17	+	94756695	94756789	94759594	94759694	94756433	94756523	94761497	94761604	15875	2,1	1,3	2,6	1,0	193	198	0.00183369	0.0437278	0.672,0.255	0.672,1.0	-0.373
19955	ENSMUSG00000052296.7	Ppp6r1	chr7	-	4651819	4651931	4657562	4657701	4646707	4646940	4658480	4659019	19955	7,7	17,4	4,2	0,1	198	198	0.000475171	0.017601	0.292,0.636	1.0,0.667	-0.37
14023	ENSMUSG00000026749.11	Nek6	chr2	+	38523950	38524091	38534937	38534989	38511667	38511793	38550552	38550671	14023	0,3	9,1	2,1	0,1	198	151	0.00150465	0.0383971	0.0,0.696	1.0,0.433	-0.369
17737	ENSMUSG00000028779.16	Pef1	chr4	+	130102935	130103274	130106308	130106526	130102557	130102727	130107362	130107650	17737	0,1	11,1	8,4	4,3	198	198	0.000114855	0.00630943	0.0,0.5	0.667,0.571	-0.369
17518	ENSMUSG00000045838.8	Ccdc9b	chr2	-	118760584	118760681	118761288	118761465	118760320	118760449	118761644	118761758	17518	5,9	3,5	2,1	0,0	198	196	7.33526e-05	0.00446087	0.623,0.641	1.0,1.0	-0.368
6717	ENSMUSG00000042423.9	Fbrs	chr7	+	127480866	127480902	127480988	127481018	127479935	127480115	127482782	127482831	6717	23,15	22,13	30,14	2,3	135	129	3.19941e-06	0.000426371	0.5,0.524	0.935,0.817	-0.364
13811	ENSMUSG00000037376.14	Trmt6	chr2	-	132812936	132813079	132815630	132815686	132812047	132812175	132815803	132816055	13811	6,2	1,4	1,2	0,0	155	198	0.000791194	0.0245066	0.885,0.39	1.0,1.0	-0.363
16699	ENSMUSG00000020111.15	Micu1	chr10	+	59708643	59708784	59721399	59721470	59702657	59702687	59727956	59728118	16699	0,0	4,7	2,7	5,7	198	170	6.21489e-06	0.000691615	0.0,0.0	0.256,0.462	-0.359
10084	ENSMUSG00000022035.6	Ccdc25	chr14	+	65863705	65863869	65863942	65864033	65860169	65860215	65865129	65866607	10084	0,0	2,2	2,2	3,4	198	190	0.00119394	0.0325454	0.0,0.0	0.39,0.324	-0.357
15247	ENSMUSG00000089872.10	Rps6kc1	chr1	-	190903509	190903748	190903790	190903905	190899450	190899571	190905082	190905118	15247	11,3	3,3	5,2	0,0	198	198	9.51685e-05	0.00548412	0.786,0.5	1.0,1.0	-0.357
19510	ENSMUSG00000029913.14	Prdm5	chr6	+	65887927	65887988	65892815	65892901	65886084	65886178	65901773	65901859	19510	3,1	19,12	19,8	16,16	160	185	0.000409667	0.0159418	0.154,0.088	0.579,0.366	-0.351
17546	ENSMUSG00000029439.14	Sfswap	chr5	+	129502479	129502920	129503457	129503608	129501448	129501596	129503982	129504152	17546	4,4	4,1	4,1	0,0	198	198	0.000146744	0.00754297	0.5,0.8	1.0,1.0	-0.35
18928	ENSMUSG00000032038.7	St3gal4	chr9	-	35056418	35056531	35116275	35116406	35055573	35055649	35116697	35116873	18928	0,0	8,8	4,1	3,7	198	198	0.000452633	0.017069	0.0,0.0	0.571,0.125	-0.348
14521	ENSMUSG00000027593.15	Raly	chr2	+	154826828	154826890	154851911	154852012	154821006	154821089	154857268	154857533	14521	4,5	10,1	6,12	1,0	161	198	0.00033044	0.0136848	0.33,0.86	0.881,1.0	-0.346
11514	ENSMUSG00000022884.15	Eif4a2	chr16	+	23111202	23111263	23111502	23111972	23110698	23110723	23113166	23114136	11514	0,0	4,1	1,4	8,4	160	198	0.00030465	0.0129726	0.0,0.0	0.134,0.553	-0.344
18396	ENSMUSG00000029802.13	Abcg2	chr6	+	58614733	58614989	58635496	58635680	58596974	58597108	58655637	58655856	18396	0,0	6,6	2,4	5,6	198	198	2.77238e-05	0.00212999	0.0,0.0	0.286,0.4	-0.343
22366	ENSMUSG00000054836.12	Elp6	chr9	+	110308936	110309202	110309784	110309987	110305239	110305349	110310094	110310173	22366	5,3	2,2	3,5	0,0	198	198	0.00190487	0.0450411	0.714,0.6	1.0,1.0	-0.343
19956	ENSMUSG00000052296.7	Ppp6r1	chr7	-	4651819	4651931	4657562	4657777	4646707	4646940	4658480	4659019	19956	8,8	17,4	4,2	0,1	198	198	0.000650303	0.0216355	0.32,0.667	1.0,0.667	-0.34
6452	ENSMUSG00000030468.12	Siglecg	chr7	+	43410942	43411206	43411413	43411461	43410483	43410556	43411561	43411756	6452	29,15	17,8	6,5	1,0	198	147	0.000244896	0.0110608	0.559,0.582	0.817,1.0	-0.338
15565	ENSMUSG00000029319.8	Coq2	chr5	-	100665869	100666268	100667471	100667504	100663579	100663701	100667891	100668058	15565	0,0	4,1	1,4	4,9	132	198	0.00012238	0.00660518	0.0,0.0	0.273,0.4	-0.337
19036	ENSMUSG00000026207.16	Speg	chr1	+	75384827	75384844	75384884	75385164	75384655	75384745	75387797	75389104	19036	7,3	51,50	18,5	21,15	116	198	0.000181058	0.00870571	0.19,0.093	0.594,0.363	-0.337
16187	ENSMUSG00000026020.9	Nop58	chr1	+	59692343	59692389	59695977	59696090	59690485	59690562	59698322	59698459	16187	0,0	4,2	0,6	3,4	145	198	0.00170694	0.0416397	0.0,0.0	0.0,0.672	-0.336
9448	ENSMUSG00000068184.7	Ndufaf2	chr13	-	108123106	108123202	108135399	108135497	108091533	108091623	108158442	108158623	9448	0,1	4,2	5,0	0,1	197	195	0.00137152	0.0358602	0.0,0.331	1.0,0.0	-0.335
17739	ENSMUSG00000028779.16	Pef1	chr4	+	130102935	130103274	130106357	130106526	130102557	130102727	130107362	130107650	17739	0,1	6,1	8,4	4,4	198	198	0.000550948	0.0192778	0.0,0.5	0.667,0.5	-0.334
16215	ENSMUSG00000024983.10	Vti1a	chr19	+	55336581	55336758	55340713	55340879	55328345	55328456	55380941	55383929	16215	0,0	4,6	4,2	8,4	198	198	0.000131721	0.0069691	0.0,0.0	0.333,0.333	-0.333
9568	ENSMUSG00000074867.4	Zfp808	chr13	+	62130248	62130339	62142008	62142169	62129932	62130028	62169441	62169568	9568	0,0	2,1	6,1	10,3	190	198	3.71715e-05	0.00265696	0.0,0.0	0.385,0.258	-0.322
21349	ENSMUSG00000036501.7	Fam13b	chr18	-	34464162	34464336	34464482	34464560	34462960	34463009	34465155	34465220	21349	1,1	15,16	5,4	7,9	177	198	0.000574325	0.0199342	0.069,0.065	0.444,0.332	-0.321
11601	ENSMUSG00000049606.16	Zfp644	chr5	-	106681903	106682013	106690729	106690873	106666784	106666845	106695642	106695699	11601	12,14	16,4	11,15	2,0	198	198	0.000318064	0.0133593	0.429,0.778	0.846,1.0	-0.32
8823	ENSMUSG00000054863.9	Tafa5	chr15	+	87726701	87727128	87737644	87737730	87720501	87720629	87757296	87759364	8823	8,4	3,2	4,4	0,0	198	185	0.000563493	0.0196214	0.714,0.651	1.0,1.0	-0.318
9569	ENSMUSG00000074867.4	Zfp808	chr13	+	62130248	62130339	62142023	62142169	62129932	62130028	62169441	62169568	9569	0,0	2,1	6,1	11,3	190	198	5.94593e-05	0.00376442	0.0,0.0	0.362,0.258	-0.31
13286	ENSMUSG00000109771.1	Gm35315	chr5	-	110086924	110087009	110092906	110092996	110080737	110080864	110094330	110094420	13286	1,0	12,5	4,5	5,15	189	184	0.000372628	0.0148975	0.075,0.0	0.438,0.245	-0.304
3211	ENSMUSG00000051331.15	Cacna1c	chr6	-	118674345	118674405	118674554	118674614	118670349	118670456	118675819	118675949	3211	17,11	7,5	7,3	0,0	159	159	3.43438e-05	0.00248808	0.708,0.688	1.0,1.0	-0.302
10265	ENSMUSG00000020594.14	Pum2	chr12	+	8678169	8678524	8692507	8692609	8674469	8674480	8698090	8698159	10265	2,0	15,11	8,5	10,13	198	198	0.000400323	0.0157067	0.118,0.0	0.444,0.278	-0.302
16939	ENSMUSG00000053332.13	Gas5	chr1	+	161036192	161036244	161036819	161037103	161035982	161036014	161037287	161037547	16939	0,0	31,20	5,10	25,20	151	198	3.3294e-07	7.76473e-05	0.0,0.0	0.208,0.396	-0.302
22209	ENSMUSG00000016933.17	Plcg1	chr2	+	160741048	160741140	160747049	160747090	160731732	160732033	160747774	160747927	22209	2,2	5,1	6,1	0,1	191	140	0.00121972	0.0330094	0.227,0.594	1.0,0.423	-0.301
9736	ENSMUSG00000046351.11	Zfp322a	chr13	-	23358959	23359092	23359297	23359427	23357633	23357713	23362579	23362654	9736	8,12	8,3	13,18	0,2	198	198	0.00066926	0.0220537	0.5,0.8	1.0,0.9	-0.3
10268	ENSMUSG00000020594.14	Pum2	chr12	+	8678169	8678524	8692417	8692609	8674764	8674839	8698090	8698159	10268	1,1	12,12	8,5	11,10	198	198	0.00049374	0.0180361	0.077,0.077	0.421,0.333	-0.3
13372	ENSMUSG00000031536.6	Polb	chr8	-	22648802	22648832	22649324	22649424	22648181	22648256	22650488	22650555	13372	0,0	7,4	2,3	5,3	198	129	0.000514723	0.0185206	0.0,0.0	0.207,0.394	-0.3
10264	ENSMUSG00000020594.14	Pum2	chr12	+	8678169	8678524	8692417	8692609	8674469	8674480	8698090	8698159	10264	2,0	14,12	8,5	10,13	198	198	0.000391696	0.0154594	0.125,0.0	0.444,0.278	-0.298
15983	ENSMUSG00000013033.16	Adgrl1	chr8	+	83926261	83926276	83928667	83928991	83924205	83924355	83929463	83930264	15983	3,6	4,2	1,1	0,0	114	198	0.000225529	0.0104037	0.566,0.839	1.0,1.0	-0.298
22000	ENSMUSG00000048537.16	Phldb1	chr9	-	44708393	44708522	44710296	44710487	44707884	44708040	44710922	44711060	22000	2,0	27,28	3,2	6,4	198	198	0.00163507	0.0404811	0.069,0.0	0.333,0.333	-0.298
10269	ENSMUSG00000020594.14	Pum2	chr12	+	8678169	8678524	8692507	8692609	8674764	8674839	8698090	8698159	10269	1,1	12,11	8,5	11,10	198	198	0.000637828	0.0213821	0.077,0.083	0.421,0.333	-0.297
22474	ENSMUSG00000044876.15	Zfp444	chr7	+	6181423	6181500	6183597	6183694	6174034	6174101	6183861	6184202	22474	4,8	3,2	1,2	0,0	176	196	0.000508085	0.0184333	0.598,0.817	1.0,1.0	-0.292
12600	ENSMUSG00000037876.17	Jmjd1c	chr10	+	67164086	67164222	67185854	67186306	67157906	67158071	67189735	67191750	12600	2,0	14,15	1,7	5,6	198	198	0.00183556	0.0437278	0.125,0.0	0.167,0.538	-0.29
15576	ENSMUSG00000029319.8	Coq2	chr5	-	100666067	100666268	100667471	100667504	100663579	100663701	100667891	100668058	15576	0,0	10,2	1,4	3,19	132	198	0.000850491	0.0257521	0.0,0.0	0.333,0.24	-0.286
15567	ENSMUSG00000029319.8	Coq2	chr5	-	100666067	100666157	100667471	100667504	100663579	100663701	100667891	100668058	15567	0,0	9,1	1,4	4,13	132	189	0.000553528	0.0193368	0.0,0.0	0.264,0.306	-0.285
8585	ENSMUSG00000022843.17	Clcn2	chr16	-	20709063	20709315	20709569	20709724	20708633	20708767	20709879	20709949	8585	8,15	5,5	10,13	0,1	198	198	0.000120569	0.00653592	0.615,0.75	1.0,0.929	-0.282
9205	ENSMUSG00000040618.7	Pck2	chr14	+	55540825	55540855	55541581	55541696	55540412	55540513	55542405	55543261	9205	5,5	3,3	3,1	0,0	129	198	0.000484779	0.0178295	0.719,0.719	1.0,1.0	-0.281
16938	ENSMUSG00000053332.13	Gas5	chr1	+	161036192	161036244	161036819	161036956	161035982	161036014	161037287	161037547	16938	0,0	24,15	5,10	29,22	151	198	2.19234e-06	0.000328683	0.0,0.0	0.184,0.373	-0.278
17744	ENSMUSG00000028779.16	Pef1	chr4	+	130103109	130103274	130106319	130106526	130102557	130102727	130107362	130107650	17744	0,1	7,3	5,1	4,3	198	198	0.00107574	0.0302277	0.0,0.25	0.556,0.25	-0.278
2053	ENSMUSG00000049606.16	Zfp644	chr5	-	106681903	106682013	106690670	106690877	106666784	106666845	106695642	106695699	2053	17,16	16,4	13,6	2,0	198	198	0.00218795	0.0498265	0.515,0.8	0.867,1.0	-0.276
20210	ENSMUSG00000025873.16	Faf2	chr13	+	54629414	54629464	54631034	54631080	54621837	54621903	54638249	54638318	20210	10,6	2,6	7,13	1,0	149	145	0.00048997	0.0179592	0.83,0.493	0.872,1.0	-0.274
13800	ENSMUSG00000028405.9	Aco1	chr4	+	40143669	40143846	40146330	40146460	40143080	40143541	40163718	40163845	13800	6,12	4,2	1,7	0,0	198	198	0.000175444	0.00852302	0.6,0.857	1.0,1.0	-0.272
214	ENSMUSG00000024958.13	Gpr137	chr19	-	6939260	6939410	6940351	6940401	6938755	6938874	6940482	6940839	214	8,5	2,4	5,2	0,0	149	198	0.000154902	0.00774918	0.842,0.624	1.0,1.0	-0.267
11591	ENSMUSG00000049606.16	Zfp644	chr5	-	106681903	106682010	106690729	106690873	106666784	106666845	106695136	106695699	11591	15,15	17,3	10,16	2,0	198	198	0.000933064	0.0274067	0.469,0.833	0.833,1.0	-0.265
12136	ENSMUSG00000028936.15	Rpl22	chr4	+	152327486	152327585	152330003	152330181	152325868	152325895	152332279	152334071	12136	1,0	4,4	9,6	15,11	198	198	0.000847843	0.025708	0.2,0.0	0.375,0.353	-0.264
15722	ENSMUSG00000085396.7	Firre	chrX	-	50598133	50598288	50600743	50600811	50595460	50595615	50603438	50603525	15722	0,0	31,11	2,5	32,7	167	198	0.000210249	0.00984614	0.0,0.0	0.069,0.459	-0.264
3340	ENSMUSG00000030779.16	Rbbp6	chr7	+	122978575	122978612	122982962	122983007	122975935	122976035	122984992	122985081	3340	97,99	130103	55,40	20,16	136	144	6.26751e-07	0.000120812	0.441,0.504	0.744,0.726	-0.262
15246	ENSMUSG00000089872.10	Rps6kc1	chr1	-	190903509	190903665	190903790	190903905	190899450	190899571	190905082	190905118	15246	11,3	4,1	5,2	0,0	198	198	0.0010674	0.0300835	0.733,0.75	1.0,1.0	-0.258
21217	ENSMUSG00000031508.14	Ankrd10	chr8	-	11620769	11620901	11623774	11623858	11619258	11619297	11628438	11628530	21217	8,13	4,3	6,16	0,0	183	198	7.60834e-05	0.00458817	0.684,0.824	1.0,1.0	-0.246
16804	ENSMUSG00000053332.13	Gas5	chr1	+	161035751	161035804	161036819	161037103	161035166	161035194	161037287	161037547	16804	13,10	10,5	37,14	3,2	152	198	0.000252421	0.0113061	0.629,0.723	0.941,0.901	-0.245
18491	ENSMUSG00000058318.15	Phf21a	chr2	+	92210229	92210402	92213306	92213421	92201511	92201538	92214048	92214598	18491	9,9	2,4	7,8	0,0	198	198	0.000132028	0.0069691	0.818,0.692	1.0,1.0	-0.245
2448	ENSMUSG00000029290.12	Zfp326	chr5	+	105886186	105886276	105886316	105888839	105878748	105878793	105891117	105891316	2448	134119	288240	154137	99125	189	198	1.65453e-09	1.11624e-06	0.328,0.342	0.62,0.534	-0.242
18789	ENSMUSG00000025027.18	Xpnpep1	chr19	-	53032361	53032556	53032624	53032703	53032008	53032097	53038513	53040214	18789	17,12	5,5	2,7	0,0	178	198	0.000120794	0.00653592	0.791,0.727	1.0,1.0	-0.241
8289	ENSMUSG00000044533.15	Rps2	chr17	+	24720943	24721142	24721142	24721306	24720533	24720731	24721622	24721727	8289	0,0	27,20	2,10	13,19	198	198	2.33074e-06	0.000337707	0.0,0.0	0.133,0.345	-0.239
18797	ENSMUSG00000020220.16	Vps13d	chr4	-	145126409	145126465	145126665	145126796	145122443	145122706	145127936	145128049	18797	0,0	40,28	1,6	5,9	198	155	9.68322e-06	0.000981461	0.0,0.0	0.135,0.343	-0.239
6924	ENSMUSG00000031626.17	Sorbs2	chr8	+	45782801	45782960	45785268	45785325	45775588	45775703	45789975	45790025	6924	32,37	8,9	4,6	0,0	198	156	0.000112549	0.00623164	0.759,0.764	1.0,1.0	-0.238
11594	ENSMUSG00000049606.16	Zfp644	chr5	-	106681903	106682010	106690729	106690873	106666784	106666845	106696531	106696830	11594	18,19	15,4	11,17	2,0	198	198	0.000680907	0.0222129	0.545,0.826	0.846,1.0	-0.238
16996	ENSMUSG00000053332.13	Gas5	chr1	+	161036217	161036244	161036819	161037103	161035982	161036014	161037287	161037547	16996	0,0	31,20	1,9	25,20	126	198	5.48238e-05	0.00350175	0.0,0.0	0.059,0.414	-0.236
19144	ENSMUSG00000025862.14	Stag2	chrX	+	42167707	42167756	42196448	42196555	42151013	42151088	42201854	42201994	19144	7,5	1,4	5,4	0,0	148	198	0.00122579	0.0330796	0.904,0.626	1.0,1.0	-0.235
18623	ENSMUSG00000028069.16	Gpatch4	chr3	+	88043466	88043611	88046437	88046531	88043123	88043179	88051161	88051289	18623	16,6	1,4	7,14	0,0	198	193	0.00215926	0.0494865	0.94,0.594	1.0,1.0	-0.233
8290	ENSMUSG00000044533.15	Rps2	chr17	+	24720943	24721142	24721142	24721487	24720533	24720731	24721622	24721727	8290	0,0	24,21	2,10	14,20	198	198	3.55774e-06	0.000468125	0.0,0.0	0.125,0.333	-0.229
2606	ENSMUSG00000027936.18	Crtc2	chr3	+	90257116	90257218	90259153	90259222	90254162	90254558	90259385	90259492	2606	65,42	42,43	70,66	26,17	198	168	0.000431216	0.0165356	0.568,0.453	0.696,0.767	-0.221
16995	ENSMUSG00000053332.13	Gas5	chr1	+	161036217	161036244	161036819	161036956	161035982	161036014	161037287	161037547	16995	0,0	24,15	1,9	29,22	126	198	0.000105547	0.00596507	0.0,0.0	0.051,0.391	-0.221
22055	ENSMUSG00000032294.17	Pkm	chr9	+	59657874	59657926	59659537	59659576	59656597	59656649	59665199	59665367	22055	25,16	4,6	1,7	0,0	151	138	0.000213761	0.00998891	0.851,0.709	1.0,1.0	-0.22
17262	ENSMUSG00000026632.17	Tatdn3	chr1	-	191052859	191052974	191054855	191054911	191049281	191049362	191055261	191055371	17262	21,23	21,11	61,78	13,15	155	198	0.00057606	0.0199624	0.561,0.728	0.857,0.869	-0.218
9461	ENSMUSG00000021710.11	Nln	chr13	-	104075510	104075657	104078787	104079119	104072762	104073022	104109415	104109614	9461	0,0	40,49	1,4	4,13	198	198	0.000476509	0.0176153	0.0,0.0	0.2,0.235	-0.217
3864	ENSMUSG00000089872.10	Rps6kc1	chr1	-	190871591	190871951	190888648	190888764	190844486	190844602	190899450	190899571	3864	207156	147174	150135	45,53	198	198	1.49242e-06	0.000242255	0.585,0.473	0.769,0.718	-0.215
4645	ENSMUSG00000020458.16	Rtn4	chr11	+	29705534	29705591	29706409	29708770	29692946	29693693	29733632	29733840	4645	216208	394368	49,99	42,65	156	198	1.46534e-07	3.76609e-05	0.41,0.418	0.597,0.659	-0.214
21211	ENSMUSG00000031508.14	Ankrd10	chr8	-	11620769	11620901	11623359	11623858	11619258	11619297	11628438	11628530	21211	11,16	4,3	7,16	0,0	198	198	0.000124018	0.00667685	0.733,0.842	1.0,1.0	-0.213
3458	ENSMUSG00000029647.15	Pan3	chr5	+	147455117	147455188	147488110	147488258	147453251	147453318	147519504	147519752	3458	548479	527452	440351	153138	170	198	1.35114e-13	4.16711e-10	0.548,0.552	0.77,0.748	-0.209
6880	ENSMUSG00000032525.15	Nktr	chr9	+	121731477	121731565	121741121	121741151	121729996	121730024	121741597	121741743	6880	76,55	48,45	56,65	14,23	187	129	0.00059074	0.0203405	0.522,0.457	0.734,0.661	-0.208
15720	ENSMUSG00000085396.7	Firre	chrX	-	50598133	50598201	50600743	50600811	50595460	50595615	50603438	50603525	15720	0,0	22,10	2,5	32,9	167	167	0.000438966	0.0167423	0.0,0.0	0.059,0.357	-0.208
20329	ENSMUSG00000029267.17	Mtf2	chr5	+	108067459	108067572	108069165	108069523	108065756	108065965	108080824	108081023	20329	17,24	7,13	28,36	6,2	198	198	0.00208787	0.048153	0.708,0.649	0.824,0.947	-0.207
4533	ENSMUSG00000022150.16	Dab2	chr15	+	6424634	6424697	6429295	6429949	6424196	6424250	6430953	6431107	4533	50,49	105,85	28,26	19,26	162	198	0.00155412	0.039334	0.368,0.413	0.643,0.55	-0.206
6321	ENSMUSG00000044456.16	Rin3	chr12	+	102325794	102325912	102350881	102350954	102312974	102313182	102358704	102358796	6321	108,72	95,80	47,36	20,15	198	172	0.000439608	0.0167423	0.497,0.439	0.671,0.676	-0.206
11602	ENSMUSG00000049606.16	Zfp644	chr5	-	106681903	106682013	106690729	106690877	106666784	106666845	106695642	106695699	11602	25,29	16,4	18,19	2,0	198	198	0.000636886	0.0213821	0.61,0.879	0.9,1.0	-0.206
10207	ENSMUSG00000020585.4	Laptm4a	chr12	+	8933569	8933818	8934003	8934284	8931627	8931748	8934695	8934772	10207	0,1	16,17	3,3	6,20	198	198	0.00194816	0.0457659	0.0,0.056	0.333,0.13	-0.204
18689	ENSMUSG00000089917.7	Uckl1	chr2	-	181571237	181571257	181572469	181572618	181570499	181570598	181573073	181573136	18689	41,32	1,11	23,28	0,0	198	119	9.02728e-05	0.0052673	0.961,0.636	1.0,1.0	-0.202
12135	ENSMUSG00000028936.15	Rpl22	chr4	+	152327486	152327585	152330003	152330111	152325868	152325895	152332279	152334071	12135	1,0	4,4	9,6	23,13	198	198	0.00187219	0.0444161	0.2,0.0	0.281,0.316	-0.198
12903	ENSMUSG00000085101.7	Platr16	chr4	+	145446495	145446771	145447859	145448007	145412186	145412280	145449466	145449756	12903	0,1	13,8	5,5	19,12	198	198	0.00058366	0.020161	0.0,0.111	0.208,0.294	-0.196
766	ENSMUSG00000022607.17	Ptk2	chr15	-	73391758	73391880	73392343	73392447	73343284	73343359	73394647	73394744	766	63,50	75,66	78,49	38,32	198	198	0.000178548	0.00862343	0.457,0.431	0.672,0.605	-0.195
2559	ENSMUSG00000037876.17	Jmjd1c	chr10	+	67189735	67189849	67215269	67215375	67185749	67186311	67216982	67217107	2559	72,42	137102	36,47	38,40	198	198	0.000206799	0.00970563	0.344,0.292	0.486,0.54	-0.195
13357	ENSMUSG00000028218.19	Fam92a	chr4	-	12166568	12166639	12166843	12166922	12164120	12164192	12168222	12168324	13357	15,11	1,5	12,25	0,0	178	170	0.000335363	0.0137908	0.935,0.678	1.0,1.0	-0.194
19485	ENSMUSG00000085412.7	Halr1	chr6	+	52106770	52106885	52111940	52112085	52103002	52103036	52112351	52112528	19485	9,14	1,6	83,82	0,1	198	198	2.42482e-05	0.00190362	0.9,0.7	1.0,0.988	-0.194
20783	ENSMUSG00000020680.15	Taf15	chr11	+	83488924	83488942	83497261	83497296	83487222	83487413	83497893	83497926	20783	34,41	141162	19,25	35,36	117	134	0.00035783	0.0144928	0.216,0.225	0.383,0.443	-0.193
2327	ENSMUSG00000070425.13	Xntrpc	chr7	+	102078732	102078818	102079004	102079177	102077748	102077927	102080528	102080604	2327	63,73	83,83	61,72	33,41	185	198	0.000140963	0.00735083	0.448,0.485	0.664,0.653	-0.192
15985	ENSMUSG00000013033.16	Adgrl1	chr8	+	83928297	83928382	83928667	83928895	83923091	83923108	83929463	83930264	15985	39,46	12,9	3,3	0,0	184	198	0.000340436	0.0139463	0.778,0.846	1.0,1.0	-0.188
3308	ENSMUSG00000026743.16	Mllt10	chr2	+	18126133	18126229	18146776	18146872	18123708	18123812	18159455	18159590	3308	242245	288252	276248	127140	195	195	2.35255e-08	7.81374e-06	0.457,0.493	0.685,0.639	-0.187
11592	ENSMUSG00000049606.16	Zfp644	chr5	-	106681903	106682010	106690729	106690877	106666784	106666845	106695136	106695699	11592	27,29	17,3	16,26	2,0	198	198	0.000631077	0.0212548	0.614,0.906	0.889,1.0	-0.184
18395	ENSMUSG00000029802.13	Abcg2	chr6	+	58614733	58614989	58635496	58635661	58596974	58597108	58655637	58655856	18395	0,0	20,6	2,4	13,13	198	198	0.000535039	0.0189569	0.0,0.0	0.133,0.235	-0.184
15569	ENSMUSG00000029319.8	Coq2	chr5	-	100666067	100666161	100667471	100667504	100663579	100663701	100667891	100668058	15569	0,0	11,1	1,4	9,20	132	193	0.00193667	0.0455456	0.0,0.0	0.14,0.226	-0.183
6259	ENSMUSG00000029461.17	Fam168a	chr7	+	100812919	100813000	100824131	100824257	100786803	100786891	100831327	100831470	6259	193129	194169	56,72	27,43	180	198	0.000128468	0.00688212	0.523,0.456	0.695,0.648	-0.182
3869	ENSMUSG00000039046.15	Usp6nl	chr2	+	6391054	6391122	6394472	6394555	6336367	6336459	6400279	6400319	3869	96,85	175126	72,63	45,62	167	182	0.000473142	0.0175812	0.374,0.424	0.636,0.525	-0.181
21575	ENSMUSG00000039887.11	Alg14	chr3	+	121328079	121328383	121360861	121360980	121320079	121320211	121361555	121363094	21575	12,8	4,1	7,3	0,0	198	198	0.00179999	0.0433222	0.75,0.889	1.0,1.0	-0.18
12899	ENSMUSG00000085101.7	Platr16	chr4	+	145446495	145446625	145447859	145448007	145412186	145412280	145449466	145449756	12899	0,1	13,8	4,5	19,12	198	198	0.000934755	0.0274103	0.0,0.111	0.174,0.294	-0.178
21574	ENSMUSG00000039887.11	Alg14	chr3	+	121328079	121328174	121360861	121360980	121320079	121320211	121361555	121363094	21574	13,7	4,1	8,6	0,0	194	198	0.00202242	0.0470997	0.768,0.877	1.0,1.0	-0.177
15599	ENSMUSG00000051285.17	Pcmtd1	chr1	+	7155083	7155271	7158771	7158978	7147636	7147739	7160891	7161063	15599	26,30	7,10	8,12	1,0	198	198	0.000354994	0.0144331	0.788,0.75	0.889,1.0	-0.175
6003	ENSMUSG00000025019.17	Lcor	chr19	+	41545874	41546007	41555607	41555701	41528560	41528640	41581777	41586536	6003	119,93	81,81	58,66	24,20	198	193	0.000424234	0.0162968	0.589,0.528	0.702,0.763	-0.174
9301	ENSMUSG00000021911.16	Parg	chr14	+	32203673	32203784	32204782	32204841	32202435	32202465	32208156	32208223	9301	14,10	6,0	9,7	0,0	198	158	0.00078134	0.0243411	0.651,1.0	1.0,1.0	-0.174
18398	ENSMUSG00000029802.13	Abcg2	chr6	+	58614733	58614989	58635517	58635680	58596974	58597108	58655637	58655856	18398	0,0	23,23	2,4	10,18	198	198	0.000454653	0.0171002	0.0,0.0	0.167,0.182	-0.174
3264	ENSMUSG00000035236.17	Scai	chr2	-	39102320	39102399	39103202	39103304	39099375	39099475	39103663	39103765	3264	88,67	55,39	162171	44,45	198	178	5.3997e-05	0.00346947	0.59,0.607	0.768,0.774	-0.172
7750	ENSMUSG00000001924.15	Uba1	chrX	+	20659199	20659296	20667473	20667644	20658420	20658526	20668448	20668565	7750	24,13	3,4	12,15	0,0	196	198	0.000316842	0.0133574	0.89,0.767	1.0,1.0	-0.171
20662	ENSMUSG00000056737.14	Capg	chr6	+	72545783	72545865	72552946	72553019	72544390	72544466	72555272	72555308	20662	3,1	31,32	6,10	25,26	181	172	0.00103481	0.0294731	0.084,0.029	0.186,0.268	-0.171
21882	ENSMUSG00000036644.15	Tbc1d9b	chr11	+	50164161	50164212	50165592	50165676	50163824	50163896	50168168	50168225	21882	25,21	8,4	1,13	0,0	150	183	0.000160425	0.00798023	0.792,0.865	1.0,1.0	-0.171
7326	ENSMUSG00000040433.16	Zbtb38	chr9	-	96718209	96718309	96731291	96731742	96682769	96689029	96732247	96732313	7326	277211	360310	142120	82100	198	198	3.42469e-05	0.00248808	0.435,0.405	0.634,0.545	-0.169
4059	ENSMUSG00000033257.14	Ttll4	chr1	+	74672843	74673010	74680353	74680463	74661749	74661889	74681299	74681409	4059	181144	235187	120120	82,76	198	198	2.10514e-05	0.00171501	0.435,0.435	0.594,0.612	-0.168
5526	ENSMUSG00000039671.18	Zmynd8	chr2	-	165846020	165846164	165851999	165852148	165842763	165842877	165875704	165875775	5526	647520	810741	152166	93124	198	198	1.06435e-06	0.000183825	0.444,0.412	0.62,0.572	-0.168
7500	ENSMUSG00000019947.10	Arid5b	chr10	-	68118250	68118348	68126698	68126751	68101894	68102093	68128788	68128993	7500	174172	501412	41,47	53,62	152	197	0.000175679	0.00852302	0.31,0.351	0.501,0.496	-0.168
14142	ENSMUSG00000060743.12	H3f3a	chr1	-	180810108	180810270	180811798	180811944	180803130	180803205	180813470	180813632	14142	0,0	1,4	6,0	12,6	198	198	0.000739066	0.0234298	0.0,0.0	0.333,0.0	-0.167
12500	ENSMUSG00000063455.16	D630045J12Rik	chr6	-	38178830	38178890	38181313	38181421	38177606	38177755	38183964	38184092	12500	0,0	50,18	8,0	13,6	198	159	8.99299e-05	0.00526151	0.0,0.0	0.331,0.0	-0.166
22380	ENSMUSG00000073664.11	Nbeal1	chr1	+	60211366	60211434	60217195	60217281	60206333	60206416	60224624	60224731	22380	0,0	92,68	4,7	30,31	167	185	7.37303e-07	0.0001389	0.0,0.0	0.129,0.2	-0.165
3863	ENSMUSG00000089872.10	Rps6kc1	chr1	-	190871591	190871951	190885333	190885427	190844486	190844602	190888648	190888764	3863	257210	143179	142159	45,52	193	198	5.42309e-05	0.00347415	0.648,0.546	0.764,0.758	-0.164
16113	ENSMUSG00000019916.14	P4ha1	chr10	+	59343682	59343794	59348180	59348539	59342683	59342835	59350403	59350600	16113	23,29	6,4	14,12	0,0	198	198	0.000145977	0.00752146	0.793,0.879	1.0,1.0	-0.164
17540	ENSMUSG00000021288.18	Klc1	chr12	+	111800343	111800410	111801194	111801640	111795547	111795678	111806007	111806074	17540	16,9	6,1	13,5	0,0	166	198	0.000269647	0.0117604	0.761,0.915	1.0,1.0	-0.162
20443	ENSMUSG00000021876.15	Rnase4	chr14	+	51096378	51096473	51101385	51101791	51091076	51091253	51104806	51106151	20443	17,9	74,63	41,40	91,86	194	198	0.000509065	0.0184333	0.19,0.127	0.315,0.322	-0.16
20742	ENSMUSG00000001472.17	Tcf25	chr8	+	123401057	123401147	123402804	123402860	123400624	123400697	123403149	123403835	20742	48,39	8,7	25,35	0,1	189	155	5.0643e-05	0.0033232	0.831,0.82	1.0,0.966	-0.158
10742	ENSMUSG00000005204.12	Senp3	chr11	-	69674907	69675042	69676616	69676758	69674468	69674606	69677089	69677167	10742	0,0	7,3	0,5	3,11	198	198	0.00190142	0.0450411	0.0,0.0	0.0,0.312	-0.156
22179	ENSMUSG00000007815.13	Rhoa	chr9	+	108324704	108324853	108326518	108326617	108315307	108315382	108327583	108327741	22179	0,0	10,9	5,0	11,2	198	198	0.00162945	0.0404347	0.0,0.0	0.312,0.0	-0.156
15849	ENSMUSG00000031922.12	Cep57	chr9	-	13823257	13823435	13826541	13826653	13821526	13821683	13826855	13827107	15849	21,22	3,5	23,23	0,0	198	198	0.000186743	0.00895909	0.875,0.815	1.0,1.0	-0.155
21077	ENSMUSG00000054612.4	Mgmt	chr7	+	136906452	136906608	136919861	136920012	136894613	136894687	136951267	136951404	21077	1,3	41,31	7,12	47,29	198	198	0.00161456	0.040239	0.024,0.088	0.13,0.293	-0.155
14527	ENSMUSG00000027593.15	Raly	chr2	+	154847248	154847395	154851911	154852012	154821006	154821089	154857268	154857533	14527	22,39	10,1	34,25	1,0	198	198	0.000517815	0.0186008	0.688,0.975	0.971,1.0	-0.154
4336	ENSMUSG00000042185.14	Nfrkb	chr9	+	31396793	31397137	31397719	31397793	31396322	31396497	31398559	31398644	4336	15,14	137147	23,11	56,37	198	173	2.35777e-05	0.00187139	0.087,0.077	0.264,0.206	-0.153
18104	ENSMUSG00000115074.1	Ndor1	chr2	-	25246679	25246805	25247959	25248070	25246331	25246595	25248121	25248240	18104	0,0	19,19	7,0	16,11	198	198	0.00037045	0.0148379	0.0,0.0	0.304,0.0	-0.152
2525	ENSMUSG00000015522.18	Arnt	chr3	+	95448371	95448483	95452584	95452629	95434387	95434561	95460376	95460421	2525	212219	141148	125111	39,45	198	144	0.000294438	0.0126374	0.522,0.518	0.7,0.642	-0.151
7332	ENSMUSG00000028580.15	Pum1	chr4	+	130719172	130719351	130730277	130730548	130718153	130718262	130741462	130741556	7332	676555	554481	427350	186157	198	198	2.90279e-07	6.88663e-05	0.55,0.536	0.697,0.69	-0.15
7095	ENSMUSG00000025558.18	Dock9	chr14	-	121591310	121591354	121591811	121591948	121586226	121586342	121594335	121594383	7095	132112	36,17	38,52	3,2	198	143	0.000440486	0.0167423	0.726,0.826	0.901,0.949	-0.149
324	ENSMUSG00000049411.15	Tmem241	chr18	-	12104098	12104180	12113394	12113472	12083991	12084069	12118403	12118450	324	73,65	82,62	88,75	51,41	177	181	0.00220404	0.04995	0.477,0.517	0.638,0.652	-0.148
4884	ENSMUSG00000024727.9	Trpm6	chr19	+	18825790	18825879	18827370	18827622	18823332	18823479	18829830	18830005	4884	3,1	90,73	9,8	46,40	188	198	1.25317e-05	0.00114155	0.034,0.014	0.171,0.174	-0.148
20441	ENSMUSG00000021876.15	Rnase4	chr14	+	51096378	51096473	51101385	51101489	51091076	51091253	51104806	51106151	20441	17,9	76,62	41,40	94,94	194	198	0.00103845	0.0294845	0.186,0.129	0.308,0.303	-0.148
21078	ENSMUSG00000054612.4	Mgmt	chr7	+	136906452	136906608	136919923	136920012	136894613	136894687	136951267	136951404	21078	1,3	42,31	7,12	41,32	198	188	0.000964458	0.0278365	0.022,0.084	0.139,0.263	-0.148
3111	ENSMUSG00000020646.17	Mboat2	chr12	+	24882716	24882794	24934566	24934622	24878190	24878336	24939293	24939348	3111	263216	146145	313280	99,89	177	155	1.17918e-05	0.00110684	0.612,0.566	0.735,0.734	-0.145
15989	ENSMUSG00000013033.16	Adgrl1	chr8	+	83928297	83928382	83928667	83928895	83924205	83924355	83929463	83930264	15989	33,41	7,6	4,2	0,0	184	198	0.000935725	0.0274103	0.835,0.88	1.0,1.0	-0.143
17997	ENSMUSG00000002109.14	Ddb2	chr2	-	91216665	91216808	91217052	91217203	91212449	91212614	91217306	91217406	17997	0,3	41,22	22,10	62,60	198	198	0.000227967	0.0104938	0.0,0.12	0.262,0.143	-0.143
22060	ENSMUSG00000032294.17	Pkm	chr9	+	59657874	59657926	59663790	59663858	59656597	59656649	59665199	59665367	22060	25,16	2,5	1,7	0,0	151	167	0.00134337	0.0352394	0.933,0.78	1.0,1.0	-0.143
4058	ENSMUSG00000033257.14	Ttll4	chr1	+	74672843	74673010	74678897	74680463	74661744	74661889	74681299	74681409	4058	181144	258216	120120	110,89	198	198	0.000259537	0.0114709	0.412,0.4	0.522,0.574	-0.142
7094	ENSMUSG00000025558.18	Dock9	chr14	-	121591310	121591354	121591811	121591879	121586226	121586342	121594335	121594383	7094	118115	36,17	36,49	3,2	167	143	0.000561396	0.0195799	0.737,0.853	0.911,0.955	-0.138
1216	ENSMUSG00000011158.8	Brf1	chr12	-	112983026	112983058	112983732	112983849	112979684	112979757	112986458	112986519	1216	4,6	60,54	8,13	24,34	198	131	0.000466613	0.0174285	0.042,0.068	0.181,0.202	-0.137
1817	ENSMUSG00000034377.10	Tulp4	chr17	+	6201699	6201834	6206890	6207057	6198671	6198852	6213383	6213608	1817	406409	277238	145120	48,40	198	198	8.60109e-05	0.00507347	0.594,0.632	0.751,0.75	-0.137
9619	ENSMUSG00000021495.10	Fam193b	chr13	-	55555982	55556120	55564519	55564580	55554216	55554448	55569704	55571120	9619	16,12	127117	40,38	177109	160	198	0.000412402	0.0159418	0.135,0.113	0.219,0.301	-0.136
15987	ENSMUSG00000013033.16	Adgrl1	chr8	+	83928297	83928382	83928667	83928991	83923091	83923108	83929463	83930264	15987	39,46	9,5	3,3	0,0	184	198	0.00109306	0.0306072	0.823,0.908	1.0,1.0	-0.135
7571	ENSMUSG00000043384.15	Gprasp1	chrX	+	135761728	135761847	135797552	135797629	135751944	135752017	135797787	135797864	7571	64,52	9,15	55,41	2,3	198	176	0.00122014	0.0330094	0.863,0.755	0.961,0.924	-0.134
3862	ENSMUSG00000089872.10	Rps6kc1	chr1	-	190844486	190844602	190871591	190871951	190834005	190834098	190885333	190885427	3862	192170	156121	85117	40,45	198	198	0.000871834	0.026178	0.552,0.584	0.68,0.722	-0.133
3706	ENSMUSG00000023150.14	Ivns1abp	chr1	+	151355166	151356236	151359621	151359751	151354633	151354759	151359952	151360177	3706	319223	20041825	471412	12871313	198	198	3.64153e-14	1.31028e-10	0.137,0.109	0.268,0.239	-0.131
12904	ENSMUSG00000085101.7	Platr16	chr4	+	145446495	145446771	145447904	145448003	145412186	145412280	145449466	145449756	12904	0,1	19,9	5,5	28,19	198	198	0.00104427	0.0295474	0.0,0.1	0.152,0.208	-0.13
15082	ENSMUSG00000026571.12	Dcaf6	chr1	-	165411463	165411599	165420110	165420253	165399653	165399868	165422855	165423041	15082	5,1	232205	22,19	150102	198	198	4.32288e-12	9.33266e-09	0.021,0.005	0.128,0.157	-0.13
11471	ENSMUSG00000045098.19	Kmt5b	chr19	+	3782755	3782852	3783593	3783775	3782219	3782279	3786388	3786627	11471	36,40	10,4	20,20	1,0	196	198	0.000358476	0.0144928	0.784,0.91	0.953,1.0	-0.129
2447	ENSMUSG00000029290.12	Zfp326	chr5	+	105878748	105878793	105886186	105886222	105876564	105876698	105886316	105886428	2447	153133	111,78	102106	36,41	144	135	0.00208911	0.048153	0.564,0.615	0.726,0.708	-0.128
3121	ENSMUSG00000038495.14	Otud7b	chr3	+	96108710	96108768	96130230	96130343	96104526	96104819	96136473	96136624	3121	31,25	304249	11,18	54,59	157	198	0.00156397	0.0394446	0.114,0.112	0.204,0.278	-0.128
2665	ENSMUSG00000048000.15	Gigyf2	chr1	+	87334269	87334334	87354403	87354486	87327002	87327092	87364103	87364233	2665	234249	351352	134136	124112	164	182	0.000462593	0.0173384	0.425,0.44	0.545,0.574	-0.127
1911	ENSMUSG00000020166.15	Cnot2	chr10	-	116517316	116517383	116537220	116537278	116507040	116507188	116549032	116549175	1911	65,66	622549	68,65	216251	157	166	2.86509e-08	9.37187e-06	0.099,0.113	0.25,0.215	-0.126
3293	ENSMUSG00000026604.17	Ptpn14	chr1	+	189798511	189798681	189822588	189822686	189786635	189786948	189825029	189825097	3293	439435	328325	173140	82,55	198	197	0.000324606	0.0135062	0.571,0.571	0.677,0.717	-0.126
17937	ENSMUSG00000028364.15	Tnc	chr4	-	63982650	63982923	63993026	63993175	63976445	63976568	63995540	63995813	17937	6,6	474381	7,6	44,36	198	198	5.20499e-07	0.00010601	0.013,0.016	0.137,0.143	-0.126
17938	ENSMUSG00000028364.15	Tnc	chr4	-	63982650	63982923	63993026	63993227	63976445	63976568	63995540	63995813	17938	5,7	474381	7,6	44,36	198	198	5.20241e-07	0.00010601	0.01,0.018	0.137,0.143	-0.126
2597	ENSMUSG00000035325.16	Sec31a	chr5	-	100375207	100375331	100378827	100379001	100368293	100368352	100381159	100381333	2597	1094930	599539	259359	97,91	198	198	1.02061e-05	0.00100057	0.646,0.633	0.728,0.798	-0.124
15002	ENSMUSG00000028538.12	St3gal3	chr4	-	118054435	118054697	118096242	118096308	118031839	118031882	118107548	118107693	15002	8,6	112130	11,8	44,55	165	198	0.00220388	0.04995	0.079,0.052	0.231,0.149	-0.124
6032	ENSMUSG00000033216.9	Eefsec	chr6	-	88297576	88298236	88355482	88355647	88281548	88281705	88376203	88376411	6032	7,5	143,93	10,12	63,46	198	198	0.000265143	0.0116109	0.047,0.051	0.137,0.207	-0.123
1107	ENSMUSG00000021495.10	Fam193b	chr13	-	55555982	55556225	55564519	55564580	55554216	55554448	55569704	55571120	1107	16,12	134126	40,38	203119	160	198	0.000887745	0.0265185	0.129,0.105	0.196,0.283	-0.122
6086	ENSMUSG00000034269.12	Setd5	chr6	+	113104934	113105121	113109884	113109990	113077364	113077712	113110373	113110525	6086	1061926	609576	465439	166140	198	198	4.71955e-06	0.000575652	0.635,0.617	0.737,0.758	-0.122
18798	ENSMUSG00000020220.16	Vps13d	chr4	-	145126409	145126622	145126665	145126796	145122443	145122706	145127936	145128049	18798	0,0	125,95	1,6	32,22	198	198	0.000461445	0.0173255	0.0,0.0	0.03,0.214	-0.122
4564	ENSMUSG00000052707.8	Tnrc6a	chr7	+	123162493	123162877	123169535	123172118	123152163	123152185	123173232	123173409	4564	322236	253196	168136	76,71	198	198	0.000897715	0.026769	0.56,0.546	0.689,0.657	-0.12
238	ENSMUSG00000024851.14	Pitpnm1	chr19	+	4110494	4110659	4110947	4110990	4109926	4109996	4111078	4111189	238	331290	136152	159154	42,43	198	142	0.00149539	0.038251	0.636,0.578	0.731,0.72	-0.119
6115	ENSMUSG00000034908.16	Sidt2	chr9	-	45947540	45947552	45947628	45947697	45946983	45947055	45947835	45947888	6115	167140	19,23	39,41	2,1	168	111	0.00159841	0.0398937	0.853,0.801	0.928,0.964	-0.119
18397	ENSMUSG00000029802.13	Abcg2	chr6	+	58614733	58614989	58635517	58635661	58596974	58597108	58655637	58655856	18397	0,0	37,23	2,4	18,25	198	198	0.00149509	0.038251	0.0,0.0	0.1,0.138	-0.119
381	ENSMUSG00000071054.12	Safb	chr17	+	56595651	56595714	56597787	56597815	56593834	56594041	56598643	56599220	381	396306	130121	147149	27,30	162	127	0.000621148	0.0210517	0.705,0.665	0.81,0.796	-0.118
4151	ENSMUSG00000026737.12	Pip4k2a	chr2	-	18889051	18889204	18906228	18906325	18872283	18872430	18908054	18908152	4151	245231	235211	163227	91134	196	198	0.000825146	0.0252324	0.513,0.525	0.644,0.631	-0.118
6081	ENSMUSG00000024201.12	Kdm4b	chr17	+	56355862	56356056	56369122	56369172	56353524	56353639	56372423	56372527	6081	508579	283261	152149	43,47	198	149	0.00127118	0.0338808	0.575,0.625	0.727,0.705	-0.116
12900	ENSMUSG00000085101.7	Platr16	chr4	+	145446495	145446625	145447904	145448003	145412186	145412280	145449466	145449756	12900	0,1	19,9	4,5	28,19	198	198	0.00197878	0.0461836	0.0,0.1	0.125,0.208	-0.116
14090	ENSMUSG00000029056.13	Pank4	chr4	+	154971372	154971554	154972429	154972569	154970873	154971027	154974629	154974785	14090	133112	240216	197161	211200	198	198	0.000958725	0.0277452	0.357,0.341	0.483,0.446	-0.116
22382	ENSMUSG00000073664.11	Nbeal1	chr1	+	60211366	60211434	60222068	60222373	60206333	60206416	60224624	60224731	22382	0,0	134,96	4,7	60,44	167	198	6.81203e-06	0.000746522	0.0,0.0	0.073,0.159	-0.116
3860	ENSMUSG00000032667.17	Pon2	chr6	-	5268977	5269178	5272324	5272451	5266964	5267046	5273000	5273166	3860	181183	196161	230214	146125	198	198	0.00119302	0.0325454	0.48,0.532	0.612,0.631	-0.115
4788	ENSMUSG00000027829.15	Ccnl1	chr3	-	65951433	65951554	65955203	65955276	65948690	65950544	65956852	65956962	4788	72,70	454403	119,88	324305	172	198	1.2139e-05	0.00112476	0.154,0.167	0.297,0.249	-0.113
5521	ENSMUSG00000039671.18	Zmynd8	chr2	-	165839997	165840090	165846020	165846239	165838811	165838899	165851999	165852148	5521	314265	722572	107,92	124148	198	192	0.00169867	0.0414899	0.297,0.31	0.456,0.376	-0.113
5524	ENSMUSG00000039671.18	Zmynd8	chr2	-	165842763	165842877	165846020	165846239	165839997	165840090	165851999	165852148	5524	315265	756640	106,93	141150	198	198	0.000632367	0.0212651	0.294,0.293	0.429,0.383	-0.113
7331	ENSMUSG00000028580.15	Pum1	chr4	+	130719172	130719351	130727997	130728164	130718153	130718262	130730277	130730548	7331	665540	469411	421346	174170	198	198	0.000119337	0.00650599	0.586,0.568	0.708,0.671	-0.113
5232	ENSMUSG00000074519.11	Zfp971	chr2	+	178031254	178031381	178031589	178031650	178023378	178023381	178032800	178034022	5232	158135	52,28	155105	14,17	198	160	0.000951578	0.0276495	0.711,0.796	0.899,0.833	-0.112
7262	ENSMUSG00000032366.15	Tpm1	chr9	-	67031950	67032026	67032465	67032541	67031451	67031514	67032793	67032864	7262	93268035	1884816916	42605067	56886230	175	175	2.68498e-06	0.000378864	0.331,0.322	0.428,0.449	-0.112
7501	ENSMUSG00000019947.10	Arid5b	chr10	-	68243003	68243229	68277929	68278184	68183823	68186256	68278689	68278721	7501	256215	482420	212153	249188	198	198	0.000529614	0.0189302	0.347,0.339	0.46,0.449	-0.112
11447	ENSMUSG00000109783.1	Gm45338	chr16	+	23534550	23534799	23554694	23554933	23527494	23527606	23559771	23560080	11447	0,1	12,7	10,5	33,38	198	198	0.00176893	0.0427174	0.0,0.125	0.233,0.116	-0.112
20665	ENSMUSG00000056737.14	Capg	chr6	+	72547942	72548026	72552946	72553019	72544390	72544466	72555272	72555308	20665	0,0	31,32	2,5	25,26	183	172	0.000957615	0.0277452	0.0,0.0	0.07,0.153	-0.112
1355	ENSMUSG00000020954.16	Strn3	chr12	-	51633578	51633719	51643103	51643214	51629373	51629507	51647993	51648135	1355	256256	249236	220257	124165	198	198	0.00124194	0.0333486	0.507,0.52	0.64,0.609	-0.111
13284	ENSMUSG00000109771.1	Gm35315	chr5	-	110080483	110080544	110080737	110080818	110076135	110079380	110094330	110094420	13284	0,1	27,34	9,7	55,46	180	160	0.00010765	0.00605224	0.0,0.025	0.127,0.119	-0.111
14460	ENSMUSG00000029647.15	Pan3	chr5	+	147503084	147503202	147519504	147519677	147488110	147488258	147521829	147521934	14460	70,60	528453	50,37	153139	198	198	1.62285e-05	0.00142101	0.117,0.117	0.246,0.21	-0.111
4646	ENSMUSG00000070738.10	Dgkd	chr1	+	87881858	87881939	87915099	87915204	87880367	87880478	87915491	87915624	4646	490374	550454	254313	217204	180	198	0.000492031	0.0180042	0.495,0.475	0.563,0.628	-0.11
2437	ENSMUSG00000022246.14	Rai14	chr15	-	10587837	10587924	10589258	10589345	10583781	10583836	10591586	10591615	2437	236195	758684	100125	207237	186	186	0.000190073	0.00907849	0.237,0.222	0.326,0.345	-0.106
15266	ENSMUSG00000040123.17	Zmym5	chr14	-	56805919	56805981	56810739	56810859	56804414	56804863	56811333	56811464	15266	76,64	7,12	91,88	5,1	198	161	0.000954228	0.0276893	0.898,0.813	0.937,0.986	-0.106
3109	ENSMUSG00000020646.17	Mboat2	chr12	+	24882716	24882794	24924198	24924294	24878190	24878336	24934566	24934622	3109	304271	226229	360336	170181	177	195	0.000799993	0.0247436	0.597,0.566	0.7,0.672	-0.105
6591	ENSMUSG00000020680.15	Taf15	chr11	+	83487222	83487413	83488924	83489045	83484976	83485079	83497261	83497296	6591	530396	257256	173175	56,64	198	198	0.001714	0.0417646	0.673,0.607	0.755,0.732	-0.104
16163	ENSMUSG00000029062.14	Cdk11b	chr4	+	155630643	155630846	155634088	155634216	155630193	155630332	155638519	155638642	16163	4,0	336198	25,4	111104	198	198	6.53115e-10	5.64004e-07	0.012,0.0	0.184,0.037	-0.104
7572	ENSMUSG00000043384.15	Gprasp1	chrX	+	135761728	135761847	135797552	135797697	135751944	135752017	135797787	135797864	7572	64,52	5,13	55,41	1,2	198	198	0.000924585	0.0272317	0.928,0.8	0.982,0.953	-0.103
8773	ENSMUSG00000116358.1	Gm49450	chr15	-	98932691	98933062	98950849	98951336	98932136	98932562	98951468	98951691	8773	1307611032	1317010714	1162711967	71018333	198	198	3.76711e-05	0.00265696	0.498,0.507	0.621,0.59	-0.103
8775	ENSMUSG00000116358.1	Gm49450	chr15	-	98932691	98933062	98951187	98951336	98932136	98932562	98951468	98951691	8775	1307511032	1317010714	1162711967	71018333	198	198	3.76091e-05	0.00265696	0.498,0.507	0.621,0.59	-0.103
14459	ENSMUSG00000029647.15	Pan3	chr5	+	147492499	147492571	147503084	147503202	147488110	147488258	147519504	147519752	14459	4,2	154141	19,4	96,67	171	198	8.47585e-06	0.000883986	0.029,0.016	0.186,0.065	-0.103
407	ENSMUSG00000039656.17	Rxrb	chr17	+	34032826	34033044	34033554	34033711	34032195	34032484	34034021	34034201	407	216156	597571	164186	354320	198	198	0.000215498	0.0100267	0.266,0.215	0.317,0.368	-0.102
1033	ENSMUSG00000021709.14	Erbin	chr13	-	103868819	103868898	103884142	103884260	103868042	103868132	103886140	103886338	1033	18961660	18251681	644629	397438	198	178	0.000254138	0.0113594	0.483,0.47	0.593,0.564	-0.102
6543	ENSMUSG00000024566.10	Atp9b	chr18	-	80795289	80795432	80808611	80808772	80778862	80778975	80844526	80844602	6543	31,14	335324	38,32	199156	198	198	1.64857e-06	0.00026039	0.085,0.041	0.16,0.17	-0.102
20838	ENSMUSG00000027247.16	Arhgap1	chr2	+	91651498	91651654	91651748	91651823	91650221	91650252	91654072	91654207	20838	31,15	459392	16,17	84,84	198	174	4.01413e-06	0.000510549	0.056,0.033	0.143,0.151	-0.102
1417	ENSMUSG00000071454.13	Dtnb	chr12	+	3596648	3596862	3632809	3632964	3591905	3591986	3643916	3644022	1417	246213	408327	138141	341364	198	198	0.00072483	0.0231322	0.376,0.394	0.288,0.279	0.102
5330	ENSMUSG00000027201.16	Myef2	chr2	-	125097976	125098075	125098449	125098518	125095911	125096120	125098796	125098847	5330	575476	813706	194257	501504	168	198	0.000323462	0.0135062	0.455,0.443	0.313,0.375	0.105
20546	ENSMUSG00000025326.12	Ube3a	chr7	+	59247291	59247434	59262021	59262058	59247172	59247217	59271946	59272236	20546	9,0	23,17	0,0	13,9	198	136	0.000784562	0.0244062	0.212,0.0	0.0,0.0	0.106
21170	ENSMUSG00000031075.18	Ano1	chr7	-	144648171	144648290	144650502	144650554	144648023	144648079	144654203	144654258	21170	17321584	41,38	243297	48,53	151	198	0	0	0.982,0.982	0.869,0.88	0.107
21181	ENSMUSG00000030850.17	Ate1	chr7	-	130503721	130503850	130504702	130504822	130481682	130481715	130507481	130507699	21181	134101	238205	56,52	159190	198	198	0.00131861	0.0348014	0.36,0.33	0.26,0.215	0.107
1415	ENSMUSG00000071454.13	Dtnb	chr12	+	3596648	3596862	3617605	3617691	3591905	3591986	3632809	3632964	1415	248213	238191	141150	215206	198	185	0.001805	0.0433945	0.493,0.51	0.38,0.405	0.109
14843	ENSMUSG00000079658.9	Eloc	chr1	-	16653597	16653712	16656362	16656459	16647954	16648007	16656821	16656915	14843	26,11	0,0	35,38	5,4	196	198	0.000742758	0.0234903	1.0,1.0	0.876,0.906	0.109
787	ENSMUSG00000034311.3	Kif4	chrX	+	100715580	100715751	100716270	100716378	100713877	100714007	100717330	100717408	787	331273	343302	91109	152185	198	198	0.00166391	0.0409602	0.491,0.475	0.374,0.371	0.11
14134	ENSMUSG00000038733.14	Wdr26	chr1	-	181178505	181178716	181180465	181180648	181177674	181177831	181181303	181181489	14134	136126	9,9	48,58	9,14	198	198	0.001154	0.0317373	0.938,0.933	0.842,0.806	0.111
12890	ENSMUSG00000085101.7	Platr16	chr4	+	145433748	145433814	145446495	145446625	145412186	145412280	145449466	145449756	12890	24,25	0,1	22,29	4,5	165	198	0.000924428	0.0272317	1.0,0.968	0.868,0.874	0.113
5331	ENSMUSG00000027201.16	Myef2	chr2	-	125097976	125098075	125098796	125098847	125095911	125096120	125100318	125100420	5331	568512	785692	231222	494495	150	198	0.000114179	0.0062883	0.489,0.494	0.382,0.372	0.114
5823	ENSMUSG00000025198.16	Erlin1	chr19	-	44039172	44039252	44040746	44040836	44034943	44037148	44047634	44047726	5823	223149	177146	103146	165182	189	179	0.00169086	0.0413878	0.544,0.491	0.372,0.432	0.116
[truncated: 336 more rows]

## Sheet: RI
ID	GeneID	geneSymbol	chr	strand	riExonStart_0base	riExonEnd	upstreamES	upstreamEE	downstreamES	downstreamEE	ID.1	IJC_SAMPLE_1	SJC_SAMPLE_1	IJC_SAMPLE_2	SJC_SAMPLE_2	IncFormLen	SkipFormLen	PValue	FDR	IncLevel1	IncLevel2	IncLevelDifference
[truncated: 2,780 more rows]

[truncated: 1 more sheets: SE]
