# Supplementary material for: The context-dependent epigenetic and organogenesis programs determine 3D vs. 2D cellular fitness of MYC-driven murine liver cancer cells
Source: eLife. 2025 May 6;14:RP101299. doi: 10.7554/eLife.101299 (PMC12055005; doi:10.7554/eLife.101299)
Supplement: Supplementary file 4. [file elife-101299-supp4.xlsx]

## Sheet: A3SS
ID	GeneID	geneSymbol	chr	strand	longExonStart_0base	longExonEnd	shortES	shortEE	flankingES	flankingEE	ID.1	IJC_SAMPLE_1	SJC_SAMPLE_1	IJC_SAMPLE_2	SJC_SAMPLE_2	IncFormLen	SkipFormLen	PValue	FDR	IncLevel1	IncLevel2	IncLevelDifference
856	ENSMUSG00000021962.9	Dcp1a	chr14	+	30487449	30487498	30487464	30487498	30484458	30484586	856	0,0	5,12	1,2	0,0	114	99	3.2235e-10	7.06678e-08	0.0,0.0	1.0,1.0	-1
4373	ENSMUSG00000004565.15	Pnpla6	chr8	+	3516506	3516568	3516509	3516568	3515636	3515690	4373	0,0	2,1	2,3	0,0	102	99	1.4172e-09	2.66117e-07	0.0,0.0	1.0,1.0	-1
7844	ENSMUSG00000008301.11	Phax	chr18	+	56586861	56587189	56586903	56587189	56584290	56584374	7844	0,0	1,1	1,1	0,0	141	99	2.097e-08	2.96263e-06	0.0,0.0	1.0,1.0	-1
10650	ENSMUSG00000003778.14	Brd8	chr18	-	34611187	34611490	34611187	34611332	34613036	34613101	10650	0,0	1,2	2,1	0,0	198	99	3.9232e-09	6.66389e-07	0.0,0.0	1.0,1.0	-1
20311	ENSMUSG00000002825.8	Qtrt1	chr9	+	21412397	21412441	21412410	21412441	21412232	21412301	20311	0,0	1,2	3,2	0,0	112	99	1.53005e-09	2.84902e-07	0.0,0.0	1.0,1.0	-1
33621	ENSMUSG00000031320.9	Rps4x	chrX	-	102187626	102188024	102187626	102187937	102188293	102188371	33621	0,0	9,4	1,4	0,0	186	99	3.42956e-11	9.30644e-09	0.0,0.0	1.0,1.0	-1
37686	ENSMUSG00000031691.14	Tnpo2	chr8	+	85051224	85051570	85051519	85051570	85050358	85050530	37686	0,0	2,1	2,1	0,0	198	99	3.9232e-09	6.66389e-07	0.0,0.0	1.0,1.0	-1
40375	ENSMUSG00000066037.14	Hnrnpr	chr4	+	136314068	136314255	136314131	136314255	136311027	136311089	40375	0,0	2,2	3,4	0,0	162	99	2.56954e-10	5.77537e-08	0.0,0.0	1.0,1.0	-1
31226	ENSMUSG00000020288.13	Ahsa2	chr11	-	23492217	23492638	23492217	23492306	23496690	23496881	31226	2,0	23,8	7,2	0,0	198	99	1.18006e-12	3.94857e-10	0.042,0.0	1.0,1.0	-0.979
3592	ENSMUSG00000029304.14	Spp1	chr5	+	104436265	104436442	104436271	104436442	104435157	104435248	3592	0,0	5,4	14,5	2,0	105	99	1.3652e-11	4.05036e-09	0.0,0.0	0.868,1.0	-0.934
28336	ENSMUSG00000042272.17	Sestd1	chr2	-	77246172	77246344	77246172	77246312	77280554	77280592	28336	0,0	2,2	8,3	1,0	131	99	8.9582e-11	2.2397e-08	0.0,0.0	0.858,1.0	-0.929
25223	ENSMUSG00000039713.16	Plekhg5	chr4	+	152107490	152107861	152107711	152107861	152106905	152107001	25223	4,2	12,18	13,14	0,0	198	99	1.11022e-16	5.74515e-14	0.143,0.053	1.0,1.0	-0.902
19223	ENSMUSG00000041936.18	Agrn	chr4	-	156177821	156178216	156177821	156178116	156178428	156178635	19223	0,1	2,2	1,2	0,0	198	99	5.42564e-09	8.90986e-07	0.0,0.2	1.0,1.0	-0.9
25754	ENSMUSG00000067150.6	Xpo5	chr17	+	46222460	46222791	46222672	46222791	46221352	46221481	25754	1,0	2,1	1,1	0,0	198	99	1.12297e-06	9.93546e-05	0.2,0.0	1.0,1.0	-0.9
37144	ENSMUSG00000078864.10	Gm14322	chr2	+	177767738	177768131	177768043	177768131	177759287	177759375	37144	1,2	4,5	5,4	0,0	198	99	4.73003e-09	7.88391e-07	0.111,0.167	1.0,1.0	-0.861
40986	ENSMUSG00000030346.16	Rad51ap1	chr6	-	126927537	126927994	126927537	126927687	126929992	126930102	40986	2,3	5,10	4,2	0,0	198	99	3.09572e-08	4.25213e-06	0.167,0.13	1.0,1.0	-0.851
21007	ENSMUSG00000038406.17	Scaf1	chr7	-	45013251	45013749	45013251	45013740	45016079	45016363	21007	1,1	3,10	2,1	0,0	108	99	1.51316e-09	2.82941e-07	0.234,0.084	1.0,1.0	-0.841
41729	ENSMUSG00000028603.15	Scp2	chr4	-	108047589	108047809	108047589	108047669	108071256	108071419	41729	8,2	48,52	12,7	0,1	198	99	2.77556e-15	1.21099e-12	0.077,0.019	1.0,0.778	-0.841
1701	ENSMUSG00000047793.13	Sned1	chr1	+	93281607	93281765	93281651	93281765	93281236	93281350	1701	0,0	1,1	3,6	0,2	143	99	1.83878e-08	2.62279e-06	0.0,0.0	1.0,0.675	-0.838
9555	ENSMUSG00000022837.14	Iqcb1	chr16	+	36831496	36831614	36831501	36831614	36828446	36828492	9555	5,2	17,16	3,2	0,0	104	99	1.024e-07	1.24959e-05	0.219,0.106	1.0,1.0	-0.838
35492	ENSMUSG00000048661.14	Lemd3	chr10	-	120931720	120932023	120931720	120931823	120977783	120979332	35492	3,5	8,12	7,3	0,0	198	99	5.51446e-09	8.98938e-07	0.158,0.172	1.0,1.0	-0.835
15321	ENSMUSG00000017421.18	Zfp207	chr11	+	80388979	80389145	80388981	80389145	80387801	80387940	15321	0,0	1,1	6,2	3,0	101	99	4.76022e-08	6.21244e-06	0.0,0.0	0.662,1.0	-0.831
26052	ENSMUSG00000028886.15	Eya3	chr4	+	132672355	132672500	132672358	132672500	132670188	132670255	26052	0,0	2,6	2,2	1,0	102	99	2.39653e-07	2.59496e-05	0.0,0.0	0.66,1.0	-0.83
22548	ENSMUSG00000002625.10	Akap8l	chr17	-	32321895	32322026	32321895	32322021	32332478	32332916	22548	0,0	4,2	6,6	3,0	104	99	5.44586e-09	8.91019e-07	0.0,0.0	0.656,1.0	-0.828
44215	ENSMUSG00000044807.13	Zfp354c	chr11	-	50817288	50817359	50817288	50817293	50817808	50817935	44215	1,0	1,1	2,2	0,0	165	99	0.000480158	0.0154063	0.375,0.0	1.0,1.0	-0.812
17043	ENSMUSG00000034667.8	Xpot	chr10	-	121596183	121596330	121596183	121596273	121599586	121599634	17043	0,1	1,1	2,7	0,0	156	99	0.000572862	0.0175942	0.0,0.388	1.0,1.0	-0.806
34015	ENSMUSG00000075376.10	Rc3h2	chr2	-	37377133	37377400	37377133	37377268	37377850	37377935	34015	7,1	11,14	15,21	1,0	198	99	4.73066e-13	1.632e-10	0.241,0.034	0.882,1.0	-0.804
41116	ENSMUSG00000056673.14	Kdm5d	chrY	+	910451	910750	910685	910750	900478	900613	41116	0,3	1,2	5,1	0,0	198	99	0.000500107	0.0158633	0.0,0.429	1.0,1.0	-0.785
27599	ENSMUSG00000028676.17	Srsf10	chr4	+	135861737	135861877	135861780	135861877	135858841	135859201	27599	4,3	25,26	28,19	3,2	142	99	0	0	0.1,0.074	0.867,0.869	-0.781
44916	ENSMUSG00000039199.6	Zdhhc1	chr8	-	105476023	105476409	105476023	105476136	105477016	105477118	44916	0,1	3,2	6,7	1,0	198	99	3.86447e-08	5.14911e-06	0.0,0.2	0.75,1.0	-0.775
35979	ENSMUSG00000035107.13	Dcbld2	chr16	+	58448451	58448947	58448815	58448947	58433325	58433463	35979	0,5	5,3	12,3	0,0	198	99	2.74735e-09	4.83262e-07	0.0,0.455	1.0,1.0	-0.772
45963	ENSMUSG00000018841.17	Rad51d	chr11	-	82889691	82890100	82889691	82889810	82890337	82890614	45963	0,1	1,1	14,10	1,0	198	99	0.000241211	0.00897543	0.0,0.333	0.875,1.0	-0.771
28186	ENSMUSG00000062981.5	Mrpl42	chr10	-	95490534	95490866	95490534	95490581	95493630	95493715	28186	0,1	5,3	18,7	1,1	198	99	1.40532e-09	2.65004e-07	0.0,0.143	0.9,0.778	-0.767
47662	ENSMUSG00000063524.13	Eno1	chr4	+	150244004	150244368	150244240	150244368	150241044	150241140	47662	178128	243242	99,68	0,0	198	99	0	0	0.268,0.209	1.0,1.0	-0.762
31216	ENSMUSG00000031078.15	Cttn	chr7	-	144449550	144450021	144449550	144449615	144454675	144454786	31216	31,35	50,49	199142	0,0	198	99	0	0	0.237,0.263	1.0,1.0	-0.75
45962	ENSMUSG00000018841.17	Rad51d	chr11	-	82889691	82890025	82889691	82889810	82890337	82890614	45962	0,1	1,1	10,10	1,0	198	99	0.000271146	0.0097945	0.0,0.333	0.833,1.0	-0.75
16488	ENSMUSG00000021597.16	Slf1	chr13	-	77091184	77091365	77091184	77091343	77100921	77101056	16488	0,1	6,3	1,3	0,1	121	99	2.86338e-06	0.000224743	0.0,0.214	1.0,0.711	-0.748
39128	ENSMUSG00000045983.16	Eif4g1	chr16	+	20673919	20674314	20674227	20674314	20672822	20672876	39128	29,27	67,57	84,77	5,2	198	99	0	0	0.178,0.191	0.894,0.951	-0.738
28185	ENSMUSG00000062981.5	Mrpl42	chr10	-	95490534	95490862	95490534	95490581	95493630	95493715	28185	0,1	5,3	12,6	1,1	198	99	1.77253e-08	2.55285e-06	0.0,0.143	0.857,0.75	-0.732
39381	ENSMUSG00000030432.12	Rpl28	chr7	+	4793760	4794177	4794049	4794177	4793592	4793626	39381	15,11	37,37	176107	11,8	198	99	0	0	0.169,0.129	0.889,0.87	-0.73
14835	ENSMUSG00000019303.14	Psmc3ip	chr11	-	101093471	101093814	101093471	101093786	101094935	101095025	14835	1,0	2,1	25,17	3,2	127	99	0.000109084	0.00476952	0.28,0.0	0.867,0.869	-0.728
20193	ENSMUSG00000023353.14	Agap3	chr5	+	24499659	24499812	24499663	24499812	24492957	24493126	20193	0,0	2,1	4,6	1,3	103	99	9.25032e-08	1.14671e-05	0.0,0.0	0.794,0.658	-0.726
1223	ENSMUSG00000034947.13	Tmem106a	chr11	+	101582500	101582704	101582624	101582704	101582241	101582325	1223	0,2	1,2	1,7	0,1	198	99	7.38233e-05	0.00346923	0.0,0.333	1.0,0.778	-0.723
14014	ENSMUSG00000097055.2	Gm4419	chr12	+	21418629	21418834	21418646	21418834	21418215	21418290	14014	0,2	1,2	9,11	0,1	116	99	0.000622484	0.0187052	0.0,0.46	1.0,0.904	-0.722
34016	ENSMUSG00000075376.10	Rc3h2	chr2	-	37377133	37377430	37377133	37377268	37377850	37377935	34016	12,3	11,14	16,25	1,0	198	99	5.33269e-11	1.396e-08	0.353,0.097	0.889,1.0	-0.72
14360	ENSMUSG00000062825.15	Actg1	chr11	-	120347084	120347536	120347084	120347370	120347635	120347875	14360	1,2	5,6	13,8	0,2	198	99	7.0524e-07	6.63537e-05	0.091,0.143	1.0,0.667	-0.717
21048	ENSMUSG00000066151.11	Fkbp15	chr4	-	62340233	62340691	62340233	62340332	62345507	62345577	21048	2,0	5,8	3,3	1,0	198	99	3.06444e-06	0.000236355	0.167,0.0	0.6,1.0	-0.717
22735	ENSMUSG00000022360.8	Atad2	chr15	-	58126047	58126257	58126047	58126139	58126548	58126714	22735	7,0	6,2	8,9	1,0	198	99	1.2333e-05	0.000777419	0.368,0.0	0.8,1.0	-0.716
27742	ENSMUSG00000006494.11	Pdk1	chr2	+	71887509	71887817	71887685	71887817	71885981	71886059	27742	2,2	2,3	7,6	0,0	198	99	6.39864e-07	6.1107e-05	0.333,0.25	1.0,1.0	-0.709
45417	ENSMUSG00000002949.15	Timm44	chr8	-	4266112	4266473	4266112	4266451	4266555	4266680	45417	4,1	4,5	2,2	0,0	121	99	4.20004e-08	5.54642e-06	0.45,0.141	1.0,1.0	-0.705
40176	ENSMUSG00000030016.14	Zfp638	chr6	+	83976210	83976350	83976285	83976350	83972245	83972283	40176	1,0	1,2	24,28	3,1	174	99	2.80813e-05	0.00154284	0.363,0.0	0.82,0.941	-0.699
48222	ENSMUSG00000027132.3	Katnbl1	chr2	+	112408260	112408433	112408382	112408433	112406073	112406353	48222	5,4	18,14	21,8	2,1	198	99	8.72593e-11	2.19396e-08	0.122,0.125	0.84,0.8	-0.697
28845	ENSMUSG00000025816.15	Sec61a2	chr2	-	5886498	5886858	5886498	5886577	5893153	5893221	28845	2,4	6,9	5,3	1,0	198	99	1.56847e-05	0.00095619	0.143,0.182	0.714,1.0	-0.695
20797	ENSMUSG00000062937.7	Mtap	chr4	+	89156399	89156613	89156445	89156613	89148188	89148275	20797	13,9	26,11	19,14	0,0	145	99	7.50511e-14	2.83051e-11	0.254,0.358	1.0,1.0	-0.694
374	ENSMUSG00000004865.16	Srpk1	chr17	-	28599470	28600456	28599470	28599869	28602687	28602853	374	15,17	23,23	191119	6,4	198	99	0	0	0.246,0.27	0.941,0.937	-0.681
15108	ENSMUSG00000091228.1	Gm20390	chr11	-	93949818	93950059	93949818	93950028	93951899	93952012	15108	0,0	2,2	2,2	3,0	130	99	0.000519524	0.0163626	0.0,0.0	0.337,1.0	-0.668
26474	ENSMUSG00000027954.9	Efna1	chr3	-	89272771	89273002	89272771	89272822	89276129	89276425	26474	4,16	16,9	23,20	0,1	198	99	3.26021e-09	5.6019e-07	0.111,0.471	1.0,0.909	-0.663
36379	ENSMUSG00000053510.12	Nrd1	chr4	+	109058262	109058634	109058581	109058634	109056509	109056648	36379	1,2	3,2	9,8	0,1	198	99	6.45881e-06	0.000445638	0.143,0.333	1.0,0.8	-0.662
17106	ENSMUSG00000060181.6	Slc35e3	chr10	-	117744624	117744847	117744624	117744844	117745784	117746365	17106	4,0	4,2	11,9	1,1	102	99	0.000881298	0.0244974	0.493,0.0	0.914,0.897	-0.659
49194	ENSMUSG00000038775.14	Vill	chr9	+	119069859	119070349	119070277	119070349	119068311	119068456	49194	3,2	4,8	50,33	0,7	198	99	2.23024e-07	2.45067e-05	0.273,0.111	1.0,0.702	-0.659
25104	ENSMUSG00000042626.13	Shc1	chr3	+	89421676	89421748	89421721	89421748	89418613	89418709	25104	1,2	5,1	2,7	0,0	144	99	2.81849e-07	2.98645e-05	0.121,0.579	1.0,1.0	-0.65
26862	ENSMUSG00000032239.10	Rp9	chr9	-	22452108	22452454	22452108	22452336	22453778	22453870	26862	1,2	2,1	2,2	0,0	198	99	0.000676993	0.0199525	0.2,0.5	1.0,1.0	-0.65
29344	ENSMUSG00000056211.13	R3hdm1	chr1	+	128174954	128175232	128175091	128175232	128168978	128169057	29344	7,4	6,4	8,2	0,0	198	99	3.42959e-07	3.55774e-05	0.368,0.333	1.0,1.0	-0.649
44553	ENSMUSG00000046879.7	Irgm1	chr11	-	48867833	48868015	48867833	48868007	48868561	48868780	44553	1,3	3,3	1,1	0,0	107	99	7.64813e-07	7.07619e-05	0.236,0.481	1.0,1.0	-0.641
19436	ENSMUSG00000057409.7	Zfp53	chr17	+	21496178	21496283	21496181	21496283	21491255	21491316	19436	1,0	1,1	1,7	0,2	102	99	0.0022482	0.0498761	0.493,0.0	1.0,0.773	-0.64
3933	ENSMUSG00000037266.18	Rsrp1	chr4	+	134926025	134926818	134926734	134926818	134925292	134925432	3933	128132	1103845	10551005	196246	198	99	0	0	0.055,0.072	0.729,0.671	-0.636
18809	ENSMUSG00000037313.16	Tacc3	chr5	+	33663824	33664283	33664266	33664283	33661520	33661645	18809	4,3	2,5	27,19	0,0	198	99	1.11967e-08	1.67773e-06	0.5,0.231	1.0,1.0	-0.635
49381	ENSMUSG00000031660.13	Brd7	chr8	-	88334104	88334219	88334104	88334216	88334304	88334424	49381	1,5	7,3	1,4	0,0	102	99	5.92036e-07	5.74116e-05	0.122,0.618	1.0,1.0	-0.63
22983	ENSMUSG00000020580.10	Rock2	chr12	+	16957205	16957305	16957225	16957305	16954906	16954967	22983	3,0	60,31	3,1	0,2	119	99	0.000652233	0.0193743	0.04,0.0	1.0,0.294	-0.627
42915	ENSMUSG00000001755.12	Coasy	chr11	+	101085538	101085887	101085789	101085887	101085281	101085346	42915	1,2	2,2	22,12	3,0	198	99	0.00118139	0.0306563	0.2,0.333	0.786,1.0	-0.627
44859	ENSMUSG00000030802.14	Bckdk	chr7	+	127905705	127905992	127905872	127905992	127905369	127905480	44859	3,5	7,4	93,35	2,3	198	99	1.47659e-08	2.16873e-06	0.176,0.385	0.959,0.854	-0.626
5190	ENSMUSG00000040940.18	Arhgef1	chr7	+	24918519	24919351	24919183	24919351	24917894	24918000	5190	0,1	2,2	3,11	1,1	198	99	6.29069e-06	0.000437429	0.0,0.2	0.6,0.846	-0.623
17009	ENSMUSG00000006731.10	B4galnt1	chr10	+	127169708	127170168	127169977	127170168	127167700	127167881	17009	1,3	1,2	19,10	0,0	198	99	0.00118875	0.0307873	0.333,0.429	1.0,1.0	-0.619
43212	ENSMUSG00000036199.9	Ndufa13	chr8	-	69894179	69894429	69894179	69894400	69894503	69894575	43212	0,0	1,1	2,3	5,0	128	99	0.000149752	0.00609177	0.0,0.0	0.236,1.0	-0.618
9043	ENSMUSG00000044533.15	Rps2	chr17	+	24720957	24721142	24721121	24721142	24720533	24720731	9043	2,3	5,1	1,1	0,0	198	99	3.52121e-07	3.6107e-05	0.167,0.6	1.0,1.0	-0.617
8269	ENSMUSG00000041057.10	Wdr43	chr17	+	71657192	71657390	71657316	71657390	71653452	71653522	8269	1,0	2,1	3,2	2,0	198	99	0.000833134	0.0233629	0.2,0.0	0.429,1.0	-0.615
37945	ENSMUSG00000028106.13	Rprd2	chr3	-	95773069	95773223	95773069	95773153	95774111	95774372	37945	0,0	2,9	1,4	2,0	169	99	0.000365498	0.0124389	0.0,0.0	0.227,1.0	-0.614
37123	ENSMUSG00000045751.16	Mms22l	chr4	+	24502747	24503091	24502931	24503091	24497837	24497963	37123	47,37	25,45	6,5	0,0	198	99	7.42684e-07	6.92907e-05	0.485,0.291	1.0,1.0	-0.612
40361	ENSMUSG00000049555.10	Tmie	chr9	-	110873795	110874177	110873795	110874098	110875427	110875537	40361	0,0	2,2	5,5	3,1	178	99	8.22176e-07	7.52866e-05	0.0,0.0	0.481,0.736	-0.609
3052	ENSMUSG00000029283.17	Cdc7	chr5	+	106974600	106975660	106975484	106975660	106973776	106974020	3052	19,18	27,40	312234	23,32	198	99	0	0	0.26,0.184	0.872,0.785	-0.607
5001	ENSMUSG00000060733.13	Ipmk	chr10	+	71372704	71372880	71372707	71372880	71347835	71348090	5001	4,5	17,9	1,3	0,1	102	99	0.00023648	0.00888488	0.186,0.35	1.0,0.744	-0.604
16029	ENSMUSG00000036819.14	Jmjd4	chr11	+	59453808	59454059	59453827	59454059	59453510	59453645	16029	1,0	2,2	7,15	6,0	118	99	0.000112728	0.00488855	0.296,0.0	0.495,1.0	-0.6
2872	ENSMUSG00000040428.19	Plekha4	chr7	+	45530481	45530658	45530568	45530658	45526329	45526441	2872	8,0	9,15	2,6	1,0	186	99	4.20575e-05	0.00217048	0.321,0.0	0.516,1.0	-0.598
4852	ENSMUSG00000101655.1	2310040G24Rik	chr6	-	86483375	86483717	86483375	86483699	86487794	86488227	4852	1,0	1,1	4,8	2,0	117	99	0.00127951	0.0325012	0.458,0.0	0.629,1.0	-0.586
16569	ENSMUSG00000041164.15	Zmiz2	chr11	+	6398246	6398724	6398555	6398724	6397506	6397686	16569	3,4	2,3	18,7	0,0	198	99	4.25816e-06	0.000313225	0.429,0.4	1.0,1.0	-0.586
18810	ENSMUSG00000037313.16	Tacc3	chr5	+	33663834	33664283	33664266	33664283	33661520	33661645	18810	6,3	2,5	23,17	0,0	198	99	1.01609e-07	1.2457e-05	0.6,0.231	1.0,1.0	-0.585
10307	ENSMUSG00000062906.12	Hdac10	chr15	-	89124174	89124428	89124174	89124256	89124531	89124588	10307	3,2	3,5	12,21	3,0	198	99	9.30213e-05	0.00418577	0.333,0.167	0.667,1.0	-0.584
49196	ENSMUSG00000038775.14	Vill	chr9	+	119069864	119070349	119070277	119070349	119068311	119068456	49196	7,2	4,8	63,38	0,7	198	99	1.55579e-05	0.000949756	0.467,0.111	1.0,0.731	-0.576
16734	ENSMUSG00000017548.15	Suz12	chr11	+	80024895	80025311	80025167	80025311	80022091	80022269	16734	13,7	10,4	11,13	0,0	198	99	2.92511e-08	4.03022e-06	0.394,0.467	1.0,1.0	-0.57
23420	ENSMUSG00000059743.12	Fdps	chr3	-	89095055	89095472	89095055	89095102	89095598	89095983	23420	1,0	1,3	21,20	2,6	198	99	3.18635e-05	0.00171052	0.333,0.0	0.84,0.625	-0.566
27452	ENSMUSG00000063897.3	CAAA01118383.1	chrGL456216.1	+	34085	34345	34137	34345	15880	16407	27452	8,2	3,4	2,3	0,0	151	99	1.41371e-06	0.000121692	0.636,0.247	1.0,1.0	-0.558
32414	ENSMUSG00000053332.13	Gas5	chr1	+	161036109	161036579	161036548	161036579	161035982	161036014	32414	113,57	244260	17241260	315315	198	99	0	0	0.188,0.099	0.732,0.667	-0.556
32422	ENSMUSG00000053332.13	Gas5	chr1	+	161036217	161036579	161036548	161036579	161035982	161036014	32422	112,58	244260	17241262	315315	198	99	0	0	0.187,0.1	0.732,0.667	-0.556
37623	ENSMUSG00000067274.10	Rplp0	chr5	+	115563288	115563727	115563334	115563727	115562425	115562566	37623	3,2	1,5	1,2	0,0	145	99	2.98996e-06	0.000231413	0.672,0.215	1.0,1.0	-0.556
32418	ENSMUSG00000053332.13	Gas5	chr1	+	161036192	161036579	161036548	161036579	161035982	161036014	32418	114,57	244260	17241260	315315	198	99	0	0	0.189,0.099	0.732,0.667	-0.555
43519	ENSMUSG00000078515.4	Ddi2	chr4	-	141709265	141709414	141709265	141709338	141713396	141713526	43519	3,2	3,1	2,3	0,0	175	99	6.76919e-05	0.00324622	0.361,0.531	1.0,1.0	-0.554
12842	ENSMUSG00000057531.14	Dtnbp1	chr13	-	44930995	44931192	44930995	44931151	44970045	44970178	12842	16,16	39,34	20,21	3,5	140	99	3.29974e-10	7.19844e-08	0.225,0.25	0.825,0.748	-0.549
28019	ENSMUSG00000029713.15	Gnb2	chr5	-	137529602	137530030	137529602	137529707	137530183	137530290	28019	4,8	4,3	4,2	0,0	198	99	4.61858e-07	4.60853e-05	0.333,0.571	1.0,1.0	-0.548
42845	ENSMUSG00000046364.14	Rpl27a	chr7	+	109520446	109520567	109520541	109520567	109519917	109519993	42845	5,3	6,1	1,5	0,0	194	99	2.51767e-07	2.70638e-05	0.298,0.605	1.0,1.0	-0.548
7031	ENSMUSG00000035342.14	Lzts2	chr19	+	45015161	45015323	45015183	45015323	45014853	45014953	7031	2,0	1,2	3,5	1,0	121	99	0.000577586	0.0177118	0.621,0.0	0.711,1.0	-0.545
40878	ENSMUSG00000036054.15	Sugp2	chr8	+	70261008	70261317	70261230	70261317	70260468	70260589	40878	3,3	41,25	60,61	23,19	198	99	0	0	0.035,0.057	0.566,0.616	-0.545
6311	ENSMUSG00000031660.13	Brd7	chr8	-	88334104	88334219	88334104	88334216	88339408	88339520	6311	1,3	1,4	1,4	0,0	102	99	2.68757e-05	0.00149506	0.493,0.421	1.0,1.0	-0.543
20625	ENSMUSG00000024392.17	Bag6	chr17	+	35142514	35142839	35142726	35142839	35142306	35142384	20625	40,40	177155	62,70	22,14	198	99	0	0	0.102,0.114	0.585,0.714	-0.541
8453	ENSMUSG00000023944.14	Hsp90ab1	chr17	-	45570257	45570692	45570257	45570557	45571017	45571177	8453	77,94	80,32	169123	0,0	198	99	0	0	0.325,0.595	1.0,1.0	-0.54
3219	ENSMUSG00000028041.17	Adam15	chr3	-	89347151	89347485	89347151	89347228	89348517	89348627	3219	9,7	6,6	14,23	1,0	198	99	1.75418e-07	1.99149e-05	0.429,0.368	0.875,1.0	-0.539
43236	ENSMUSG00000030505.17	Prmt3	chr7	+	49848498	49848824	49848736	49848824	49828943	49829030	43236	0,1	8,2	5,5	2,1	198	99	6.21674e-06	0.000434322	0.0,0.2	0.556,0.714	-0.535
20626	ENSMUSG00000024392.17	Bag6	chr17	+	35142559	35142839	35142726	35142839	35142306	35142384	20626	50,46	177155	68,70	22,14	198	99	0	0	0.124,0.129	0.607,0.714	-0.534
6403	ENSMUSG00000040621.14	Gemin8	chrX	+	166189227	166189342	166189322	166189342	166180445	166180809	6403	1,0	1,1	8,7	6,0	194	99	0.00087057	0.0242447	0.338,0.0	0.405,1.0	-0.533
35273	ENSMUSG00000029227.15	Fip1l1	chr5	+	74545748	74546160	74546052	74546160	74542008	74542112	35273	5,6	5,2	2,9	0,0	198	99	3.46861e-07	3.5734e-05	0.333,0.6	1.0,1.0	-0.533
2557	ENSMUSG00000026821.16	Ralgds	chr2	+	28542854	28542950	28542890	28542950	28542289	28542483	2557	48,53	89,72	65,68	5,13	135	99	0	0	0.283,0.351	0.905,0.793	-0.532
43453	ENSMUSG00000001909.16	Trmt1	chr8	+	84690703	84690933	84690772	84690933	84690516	84690572	43453	14,5	27,25	48,40	15,8	168	99	9.38957e-11	2.30864e-08	0.234,0.105	0.653,0.747	-0.53
8452	ENSMUSG00000023944.14	Hsp90ab1	chr17	-	45570257	45570685	45570257	45570557	45571017	45571177	8452	81,99	80,32	169123	0,0	198	99	0	0	0.336,0.607	1.0,1.0	-0.528
9766	ENSMUSG00000072214.7	2022-09-05	chr16	-	18623104	18623388	18623104	18623240	18624110	18624212	9766	8,0	5,3	5,2	0,1	198	99	0.000701798	0.0204985	0.444,0.0	1.0,0.5	-0.528
37067	ENSMUSG00000040455.17	Usp45	chr4	+	21810718	21810823	21810741	21810823	21798604	21798735	37067	0,0	4,1	3,5	2,4	122	99	6.06836e-06	0.000425292	0.0,0.0	0.549,0.504	-0.526
32409	ENSMUSG00000053332.13	Gas5	chr1	+	161036094	161036579	161036548	161036579	161035982	161036014	32409	144,76	244260	17391290	315315	198	99	0	0	0.228,0.128	0.734,0.672	-0.525
23304	ENSMUSG00000036427.5	Gpi1	chr7	-	34229282	34229437	34229282	34229373	34229539	34229794	23304	231159	336289	29,29	4,5	163	99	4.79616e-14	1.85603e-11	0.295,0.25	0.815,0.779	-0.524
11970	ENSMUSG00000095493.2	A630023A22Rik	chr14	-	34052469	34052776	34052469	34052765	34053576	34053772	11970	1,4	2,2	3,3	0,0	110	99	0.000491249	0.0156332	0.31,0.643	1.0,1.0	-0.523
16459	ENSMUSG00000049811.16	Fam161a	chr11	+	23015654	23015884	23015658	23015884	23008346	23008631	16459	1,4	5,1	2,4	0,0	103	99	3.5585e-05	0.00187635	0.161,0.794	1.0,1.0	-0.522
30903	ENSMUSG00000027206.13	Cops2	chr2	-	125842432	125842696	125842432	125842510	125844809	125844935	30903	43,54	43,52	32,43	4,2	198	99	2.24942e-11	6.3016e-09	0.333,0.342	0.8,0.915	-0.52
28941	ENSMUSG00000026113.17	Inpp4a	chr1	+	37408126	37410736	37410289	37410736	37398765	37398920	28941	2,5	3,1	2,9	0,0	198	99	0.00018479	0.00725836	0.25,0.714	1.0,1.0	-0.518
33635	ENSMUSG00000002546.16	Golga2	chr2	+	32305182	32305295	32305212	32305295	32304958	32305034	33635	13,9	11,15	13,6	0,1	129	99	5.92138e-07	5.74116e-05	0.476,0.315	1.0,0.822	-0.516
33790	ENSMUSG00000023991.16	Foxp4	chr17	-	47880769	47880844	47880769	47880841	47888124	47888220	33790	2,2	2,2	8,3	0,0	102	99	0.000114016	0.00492428	0.493,0.493	1.0,1.0	-0.507
33983	ENSMUSG00000029439.14	Sfswap	chr5	+	129559449	129559608	129559468	129559608	129554442	129554708	33983	2,2	18,19	10,6	4,5	118	99	1.84628e-06	0.000153355	0.085,0.081	0.677,0.502	-0.507
44815	ENSMUSG00000053877.12	Srcap	chr7	+	127519656	127519832	127519659	127519832	127519580	127519602	44815	2,3	1,6	10,3	0,0	102	99	1.30543e-06	0.000114137	0.66,0.327	1.0,1.0	-0.506
734	ENSMUSG00000007591.15	Tssk4	chr14	+	55651427	55651852	55651488	55651852	55650900	55651115	734	1,0	0,2	3,4	0,0	160	99	0.00224532	0.0498371	1.0,0.0	1.0,1.0	-0.5
2833	ENSMUSG00000026365.15	Cfh	chr1	-	140108757	140108943	140108757	140108940	140112432	140112606	2833	0,1	3,3	3,1	0,3	102	99	0.00139314	0.0349092	0.0,0.244	1.0,0.244	-0.5
20848	ENSMUSG00000025190.13	Got1	chr19	-	43504521	43504895	43504521	43504687	43506921	43507026	20848	5,1	4,1	18,9	1,1	198	99	0.000989729	0.0266299	0.385,0.333	0.9,0.818	-0.5
25907	ENSMUSG00000001138.13	Cnnm3	chr1	+	36520485	36520915	36520818	36520915	36520077	36520227	25907	0,1	2,0	8,10	0,0	198	99	0.00119564	0.0308283	0.0,1.0	1.0,1.0	-0.5
36752	ENSMUSG00000024359.10	Hspa9	chr18	-	34938266	34938407	34938266	34938374	34938583	34938724	36752	0,1	3,0	1,2	0,0	132	99	0.000812343	0.0229389	0.0,1.0	1.0,1.0	-0.5
36781	ENSMUSG00000028617.10	Lrrc42	chr4	-	107240901	107241245	107240901	107241010	107243207	107243527	36781	1,0	0,2	2,4	0,0	198	99	0.00119564	0.0308283	1.0,0.0	1.0,1.0	-0.5
42913	ENSMUSG00000038782.7	1700028J19Rik	chr7	-	44232355	44232556	44232355	44232462	44246582	44246695	42913	0,1	2,0	11,12	0,0	193	99	0.00127568	0.0324596	0.0,1.0	1.0,1.0	-0.5
46557	ENSMUSG00000057551.10	Zfp317	chr9	+	19625734	19625995	19625894	19625995	19625499	19625637	46557	1,0	0,4	2,1	0,0	198	99	0.000116871	0.00501069	1.0,0.0	1.0,1.0	-0.5
5994	ENSMUSG00000025899.14	Alkbh8	chr9	+	3349357	3349490	3349419	3349490	3345780	3345876	5994	2,4	34,25	23,6	8,4	161	99	3.34171e-10	7.25444e-08	0.035,0.09	0.639,0.48	-0.497
21077	ENSMUSG00000025967.16	Eef1b2	chr1	+	63178022	63178208	63178027	63178208	63177753	63177876	21077	44,33	67,51	24,22	3,3	104	99	3.64537e-11	9.77289e-09	0.385,0.381	0.884,0.875	-0.496
9037	ENSMUSG00000044533.15	Rps2	chr17	+	24720943	24721142	24721121	24721142	24720533	24720731	9037	7,3	5,1	2,10	0,0	198	99	1.36324e-06	0.000117802	0.412,0.6	1.0,1.0	-0.494
11062	ENSMUSG00000024191.15	Bnip1	chr17	+	26783266	26783537	26783444	26783537	26782577	26782631	11062	3,1	2,2	3,7	1,0	198	99	0.000448791	0.0146105	0.429,0.2	0.6,1.0	-0.486
42919	ENSMUSG00000101166.6	Gm28496	chr7	+	44248234	44248295	44248251	44248295	44246725	44246808	42919	1,1	3,4	29,25	8,14	116	99	0.00162832	0.0391704	0.221,0.176	0.756,0.604	-0.481
43286	ENSMUSG00000030741.15	Spns1	chr7	-	126373769	126373968	126373769	126373836	126375066	126375203	43286	25,27	13,16	36,39	0,2	198	99	7.83961e-10	1.57867e-07	0.49,0.458	1.0,0.907	-0.48
45042	ENSMUSG00000019795.17	Pcmt1	chr10	-	7648466	7648663	7648466	7648660	7649050	7649155	45042	0,0	5,6	7,6	8,6	102	99	1.11994e-06	9.93546e-05	0.0,0.0	0.459,0.493	-0.476
31505	ENSMUSG00000030037.9	Mrpl53	chr6	+	83109524	83109939	83109568	83109939	83109313	83109426	31505	0,1	1,1	8,15	4,3	143	99	0.00149474	0.0366504	0.0,0.409	0.581,0.776	-0.474
25120	ENSMUSG00000005417.17	Mprip	chr11	+	59740176	59740666	59740508	59740666	59737071	59737582	25120	6,2	18,20	24,22	18,4	198	99	9.15814e-06	0.000605061	0.143,0.048	0.4,0.733	-0.471
24291	ENSMUSG00000026821.16	Ralgds	chr2	+	28542851	28542950	28542890	28542950	28542332	28542483	24291	19,28	89,72	19,23	5,13	138	99	2.12217e-08	2.97927e-06	0.133,0.218	0.732,0.559	-0.47
16692	ENSMUSG00000020430.12	Pes1	chr11	+	3977291	3977783	3977685	3977783	3977015	3977200	16692	0,0	1,1	3,4	2,2	198	99	2.45786e-05	0.00139784	0.0,0.0	0.429,0.5	-0.465
33620	ENSMUSG00000031320.9	Rps4x	chrX	-	102187626	102187972	102187626	102187937	102188293	102188371	33620	13,7	9,4	4,4	0,0	134	99	5.41535e-06	0.000383757	0.516,0.564	1.0,1.0	-0.46
46268	ENSMUSG00000007610.15	Gtpbp3	chr8	+	71499352	71499583	71499402	71499583	71499154	71499264	46268	0,0	5,1	1,8	1,5	149	99	2.54799e-06	0.000204681	0.0,0.0	0.399,0.515	-0.457
46723	ENSMUSG00000010205.11	Raver1	chr9	-	21080083	21080191	21080083	21080168	21080704	21080817	46723	9,8	13,9	12,15	2,2	122	99	2.63298e-05	0.00147021	0.36,0.419	0.83,0.859	-0.455
19046	ENSMUSG00000045934.15	Mtmr11	chr3	+	96168561	96168765	96168645	96168765	96168072	96168143	19046	0,1	3,2	19,16	6,9	183	99	6.33121e-05	0.00306259	0.0,0.213	0.631,0.49	-0.454
26577	ENSMUSG00000022771.17	Ppil2	chr16	-	17091855	17092233	17091855	17091889	17092684	17092791	26577	8,4	5,10	16,23	4,2	198	99	0.000607863	0.0183549	0.444,0.167	0.667,0.852	-0.454
34417	ENSMUSG00000038759.15	Nup205	chr6	+	35245504	35245579	35245508	35245579	35245247	35245376	34417	4,2	5,1	11,1	0,0	103	99	5.38606e-06	0.00038229	0.435,0.658	1.0,1.0	-0.454
49710	ENSMUSG00000020078.16	Vps26a	chr10	-	62458923	62459063	62458923	62459033	62463690	62463759	49710	1,0	5,1	4,6	3,4	129	99	0.000251227	0.00924759	0.133,0.0	0.506,0.535	-0.454
3303	ENSMUSG00000027652.15	Ralgapb	chr2	+	158450176	158450310	158450188	158450310	158448319	158448449	3303	24,24	43,56	82,69	17,26	111	99	2.29261e-13	8.16224e-11	0.332,0.277	0.811,0.703	-0.453
45146	ENSMUSG00000038611.17	Phrf1	chr7	+	141247198	141247317	141247226	141247317	141246846	141246944	45146	0,0	4,5	3,1	1,3	127	99	0.00186529	0.0431227	0.0,0.0	0.7,0.206	-0.453
10932	ENSMUSG00000037119.4	Fam91a1	chr15	+	58442931	58443274	58443160	58443274	58441577	58441726	10932	5,5	50,35	41,19	12,15	198	99	9.20093e-11	2.27483e-08	0.048,0.067	0.631,0.388	-0.452
31949	ENSMUSG00000026193.15	Fn1	chr1	-	71613762	71614033	71613762	71613858	71615359	71615551	31949	11,10	3,6	3,1	0,0	198	99	2.72435e-06	0.000216117	0.647,0.455	1.0,1.0	-0.449
42690	ENSMUSG00000038535.17	Zfp280d	chr9	+	72298681	72298848	72298719	72298848	72295974	72296035	42690	5,7	4,3	20,18	0,0	137	99	9.92982e-07	8.96363e-05	0.475,0.628	1.0,1.0	-0.449
25002	ENSMUSG00000038717.8	Atp5l	chr9	-	44913216	44913488	44913216	44913462	44914650	44915085	25002	2,5	2,2	4,1	0,0	125	99	0.00071982	0.02091	0.442,0.664	1.0,1.0	-0.447
2735	ENSMUSG00000033793.12	Atp6v1h	chr1	+	5093362	5095728	5095614	5095728	5089008	5089111	2735	430337	167145	9871083	0,5	198	99	0	0	0.563,0.537	1.0,0.991	-0.446
44697	ENSMUSG00000073838.10	Tufm	chr7	+	126488265	126488754	126488649	126488754	126487628	126487782	44697	12,3	7,7	48,55	10,6	198	99	0.000590434	0.0179973	0.462,0.176	0.706,0.821	-0.444
6168	ENSMUSG00000028923.14	Necap2	chr4	-	141071580	141071717	141071580	141071695	141072528	141072637	6168	5,4	25,17	17,15	6,13	121	99	1.25314e-05	0.000786009	0.141,0.161	0.699,0.486	-0.442
20054	ENSMUSG00000027423.15	Snx5	chr2	-	144259310	144259562	144259310	144259558	144260724	144260835	20054	8,6	24,28	10,6	4,4	103	99	7.92661e-05	0.00370155	0.243,0.171	0.706,0.59	-0.441
18915	ENSMUSG00000062822.8	4833420G17Rik	chr13	+	119474064	119474194	119474112	119474194	119473832	119473956	18915	0,0	1,2	8,5	5,6	147	99	1.57851e-05	0.000960834	0.0,0.0	0.519,0.359	-0.439
33706	ENSMUSG00000070003.7	Ssbp4	chr8	-	70602400	70602676	70602400	70602462	70608124	70608314	33706	7,5	5,1	21,8	0,0	198	99	3.85739e-06	0.000289145	0.412,0.714	1.0,1.0	-0.437
1144	ENSMUSG00000025144.17	Cenpx	chr11	-	120711702	120711895	120711702	120711756	120713692	120713738	1144	29,17	12,10	179194	10,2	198	99	2.10354e-11	6.0396e-09	0.547,0.459	0.899,0.98	-0.436
5154	ENSMUSG00000030409.15	Dmpk	chr7	+	19092417	19092632	19092542	19092632	19092207	19092254	5154	0,1	4,3	30,6	7,6	198	99	2.71333e-05	0.00150375	0.0,0.143	0.682,0.333	-0.436
3852	ENSMUSG00000015790.16	Surf1	chr2	-	26915595	26915784	26915595	26915769	26916256	26916345	3852	6,4	22,29	19,6	7,6	114	99	1.74064e-05	0.00104823	0.191,0.107	0.702,0.465	-0.434
39626	ENSMUSG00000021748.9	Pdhb	chr14	-	8169344	8169807	8169344	8169436	8170160	8170446	39626	45,21	23,7	48,38	1,0	198	99	5.31508e-11	1.396e-08	0.495,0.6	0.96,1.0	-0.432
47928	ENSMUSG00000019087.13	Atp6ap1	chrX	+	74300249	74300627	74300577	74300627	74297622	74297749	47928	894928	386350	634636	5,4	198	99	0	0	0.537,0.57	0.984,0.988	-0.432
4570	ENSMUSG00000026207.16	Speg	chr1	+	75384033	75384068	75384038	75384068	75383136	75383179	4570	5,5	10,14	14,18	5,7	104	99	6.76176e-05	0.00324615	0.322,0.254	0.727,0.71	-0.43
39625	ENSMUSG00000021748.9	Pdhb	chr14	-	8169344	8169765	8169344	8169436	8170160	8170446	39625	46,21	23,7	48,39	1,0	198	99	4.72289e-11	1.25109e-08	0.5,0.6	0.96,1.0	-0.43
5153	ENSMUSG00000030409.15	Dmpk	chr7	+	19092417	19092632	19092546	19092632	19091938	19092254	5153	0,1	4,3	31,6	8,6	198	99	2.70059e-05	0.00149856	0.0,0.143	0.66,0.333	-0.425
25388	ENSMUSG00000003617.16	Cp	chr3	+	19988905	19989065	19989057	19989065	19987932	19988072	25388	12,4	4,3	25,24	1,1	198	99	0.000493661	0.0156812	0.6,0.4	0.926,0.923	-0.425
11221	ENSMUSG00000013236.17	Ptprs	chr17	-	56424879	56425162	56424879	56424977	56425326	56425926	11221	36,31	236201	165132	76,74	198	99	0	0	0.071,0.072	0.521,0.471	-0.424
35686	ENSMUSG00000028273.15	Pdlim5	chr3	-	142303220	142303421	142303220	142303254	142303942	142303979	35686	17,16	9,4	9,9	0,0	198	99	2.76678e-06	0.000219093	0.486,0.667	1.0,1.0	-0.423
27713	ENSMUSG00000097195.9	Snhg5	chr9	-	88522306	88522628	88522306	88522579	88522850	88522929	27713	8,4	7,3	18,24	2,2	148	99	0.00026333	0.00959655	0.433,0.471	0.858,0.889	-0.421
36368	ENSMUSG00000094365.1	Gm21982	chr7	-	30645666	30646026	30645666	30645842	30647559	30647634	36368	5,7	10,5	17,18	5,2	198	99	0.00148628	0.0365033	0.2,0.412	0.63,0.818	-0.418
4791	ENSMUSG00000031826.20	Usp10	chr8	+	119941109	119942138	119941112	119942138	119931848	119931917	4791	12,8	20,20	5,14	2,4	102	99	0.000162054	0.00654437	0.368,0.28	0.708,0.773	-0.416
5965	ENSMUSG00000025316.16	Banp	chr8	+	122007090	122007162	122007099	122007162	122005551	122005682	5965	29,32	136112	149143	84,94	108	99	0	0	0.164,0.208	0.619,0.582	-0.415
15719	ENSMUSG00000020886.17	Dlg4	chr11	+	70030554	70030654	70030603	70030654	70030398	70030452	15719	21,19	80,57	16,13	6,8	148	99	4.2692e-07	4.29847e-05	0.149,0.182	0.641,0.521	-0.415
47855	ENSMUSG00000035382.9	Pcsk7	chr9	+	45925914	45926067	45925917	45926067	45919791	45919894	47855	1,0	1,2	5,5	5,1	102	99	0.00184183	0.0426871	0.493,0.0	0.493,0.829	-0.415
1487	ENSMUSG00000036916.13	Zfp280c	chrX	-	48578379	48578556	48578379	48578529	48591672	48591761	1487	31,20	18,12	32,17	1,0	126	99	1.73891e-09	3.1916e-07	0.575,0.567	0.962,1.0	-0.41
9434	ENSMUSG00000024830.17	Rps6kb2	chr19	-	4158065	4158366	4158065	4158363	4158609	4158919	9434	0,0	4,1	5,1	5,2	102	99	1.5543e-05	0.000949756	0.0,0.0	0.493,0.327	-0.41
14959	ENSMUSG00000049807.16	Arhgap23	chr11	+	97448110	97448523	97448444	97448523	97446508	97446551	14959	6,6	4,1	4,5	0,0	198	99	2.99042e-05	0.00162494	0.429,0.75	1.0,1.0	-0.41
45386	ENSMUSG00000019470.12	Xab2	chr8	-	3610846	3611190	3610846	3611018	3611393	3611584	45386	4,7	4,1	27,11	1,0	198	99	0.000182584	0.00720989	0.333,0.778	0.931,1.0	-0.41
41567	ENSMUSG00000019254.16	Ppp1r12c	chr7	-	4484449	4484913	4484449	4484897	4485010	4485084	41567	3,6	3,2	5,2	0,0	115	99	7.30251e-05	0.00343534	0.463,0.721	1.0,1.0	-0.408
9868	ENSMUSG00000022789.15	Dnm1l	chr16	-	16340995	16341465	16340995	16341067	16345997	16346145	9868	10,4	24,39	21,18	14,6	198	99	5.17531e-07	5.1068e-05	0.172,0.049	0.429,0.6	-0.404
49397	ENSMUSG00000026171.12	Rnf25	chr1	-	74598692	74599159	74598692	74598792	74601324	74601397	49397	15,11	2,8	36,26	0,0	198	99	1.10084e-06	9.81835e-05	0.789,0.407	1.0,1.0	-0.402
33982	ENSMUSG00000029439.14	Sfswap	chr5	+	129559346	129559608	129559468	129559608	129554442	129554708	33982	4,3	18,19	12,6	4,5	198	99	4.74679e-05	0.00238697	0.1,0.073	0.6,0.375	-0.401
10609	ENSMUSG00000033088.19	Triobp	chr15	+	78960945	78961105	78960948	78961105	78959854	78960074	10609	0,2	28,13	9,4	9,5	102	99	1.019e-06	9.16133e-05	0.0,0.13	0.493,0.437	-0.4
15721	ENSMUSG00000020886.17	Dlg4	chr11	+	70030597	70030654	70030603	70030654	70030398	70030452	15721	15,18	80,57	11,10	6,8	105	99	9.41739e-06	0.000619058	0.15,0.229	0.634,0.541	-0.398
2979	ENSMUSG00000027282.17	Mtch2	chr2	+	90853023	90853113	90853050	90853113	90849597	90849704	2979	29,16	135,88	82101	57,70	126	99	0	0	0.144,0.125	0.531,0.531	-0.397
12418	ENSMUSG00000049658.13	Bdp1	chr13	-	100078658	100078799	100078658	100078752	100089352	100089447	12418	4,4	3,1	6,9	0,0	146	99	0.000694678	0.0203256	0.475,0.731	1.0,1.0	-0.397
39642	ENSMUSG00000032182.15	Yipf2	chr9	-	21592295	21592661	21592295	21592588	21592736	21592772	39642	11,6	29,22	18,28	5,21	172	99	6.55751e-05	0.00316174	0.179,0.136	0.674,0.434	-0.397
42978	ENSMUSG00000002963.17	Pnkp	chr7	+	44860047	44860431	44860359	44860431	44859887	44859945	42978	4,6	9,7	30,22	5,10	198	99	0.000959853	0.0261422	0.182,0.3	0.75,0.524	-0.396
42980	ENSMUSG00000002963.17	Pnkp	chr7	+	44860055	44860431	44860359	44860431	44859887	44859945	42980	4,6	9,7	31,21	5,10	198	99	0.00117842	0.0306149	0.182,0.3	0.756,0.512	-0.393
16709	ENSMUSG00000075702.9	Selenom	chr11	+	3516444	3516920	3516841	3516920	3516260	3516296	16709	7,12	24,21	46,48	14,23	198	99	2.15429e-07	2.39083e-05	0.127,0.222	0.622,0.511	-0.392
39703	ENSMUSG00000085412.7	Halr1	chr6	+	52112347	52112528	52112351	52112528	52106770	52106896	39703	1,0	9,2	8,9	9,12	103	99	6.89761e-05	0.00329361	0.096,0.0	0.461,0.419	-0.392
5502	ENSMUSG00000030929.17	Eri2	chr7	-	119786738	119787485	119786738	119786827	119787733	119787834	5502	12,12	7,13	120120	20,14	198	99	9.16677e-06	0.000605061	0.462,0.316	0.75,0.811	-0.391
23316	ENSMUSG00000031697.12	Orc6	chr8	+	85302840	85302959	85302861	85302959	85301108	85301238	23316	0,0	2,1	4,4	10,3	120	99	3.2232e-05	0.00172406	0.0,0.0	0.248,0.524	-0.386
2250	ENSMUSG00000022587.14	Ly6e	chr15	+	74957776	74957877	74957779	74957877	74956554	74956713	2250	51,38	37,19	27,34	0,0	102	99	2.54574e-13	8.99152e-11	0.572,0.66	1.0,1.0	-0.384
5882	ENSMUSG00000056608.14	Chd9	chr8	+	91034904	91035065	91034907	91035065	91033338	91034244	5882	3,8	1,8	6,2	0,0	102	99	5.02566e-06	0.000361319	0.744,0.493	1.0,1.0	-0.381
25270	ENSMUSG00000002014.12	Ssr4	chrX	+	73790407	73790811	73790653	73790811	73790030	73790120	25270	43,37	19,19	186151	15,6	198	99	2.41802e-11	6.72558e-09	0.531,0.493	0.861,0.926	-0.381
37812	ENSMUSG00000042726.14	Trafd1	chr5	-	121373137	121374067	121373137	121373474	121375015	121375199	37812	44,26	12,10	189223	1,2	198	99	2.22045e-15	9.88165e-13	0.647,0.565	0.99,0.982	-0.38
25262	ENSMUSG00000002014.12	Ssr4	chrX	+	73790328	73790811	73790653	73790811	73790030	73790120	25262	44,38	19,19	197150	15,6	198	99	1.91218e-11	5.56195e-09	0.537,0.5	0.868,0.926	-0.379
25266	ENSMUSG00000002014.12	Ssr4	chrX	+	73790344	73790811	73790653	73790811	73790030	73790120	25266	46,36	19,19	190155	15,6	198	99	2.25143e-11	6.3016e-09	0.548,0.486	0.864,0.928	-0.379
878	ENSMUSG00000005899.14	Smpd4	chr16	+	17638379	17638641	17638495	17638641	17635481	17635568	878	4,1	5,14	38,33	23,10	198	99	0.000107066	0.00470359	0.286,0.034	0.452,0.623	-0.378
27206	ENSMUSG00000027282.17	Mtch2	chr2	+	90852792	90853062	90853050	90853062	90849597	90849704	27206	31,28	135,88	126122	57,70	198	99	0	0	0.103,0.137	0.525,0.466	-0.376
18978	ENSMUSG00000028986.12	Klhl7	chr5	+	24134938	24135170	24134963	24135170	24100647	24100874	18978	5,9	2,5	2,3	0,0	124	99	4.0701e-05	0.00211356	0.666,0.59	1.0,1.0	-0.372
22420	ENSMUSG00000024767.11	Otub1	chr19	-	7199662	7200107	7199662	7199747	7204057	7204156	22420	8,13	2,5	109,85	0,1	198	99	6.69482e-07	6.35266e-05	0.667,0.565	1.0,0.977	-0.372
27208	ENSMUSG00000027282.17	Mtch2	chr2	+	90852815	90853062	90853050	90853062	90849597	90849704	27208	31,30	135,88	123122	57,70	198	99	0	0	0.103,0.146	0.519,0.466	-0.368
3971	ENSMUSG00000003166.20	Dgcr2	chr16	-	17858359	17858579	17858359	17858570	17859403	17859526	3971	61,75	194172	169155	70114	108	99	1.11799e-13	4.07821e-11	0.224,0.286	0.689,0.555	-0.367
4783	ENSMUSG00000039205.16	Ciz1	chr2	+	32363432	32363656	32363622	32363656	32363060	32363158	4783	60,38	24,18	72,48	5,2	198	99	4.5981e-08	6.0185e-06	0.556,0.514	0.878,0.923	-0.366
38591	ENSMUSG00000019518.11	Ap4m1	chr5	+	138172552	138172893	138172786	138172893	138172348	138172479	38591	6,11	2,5	125102	6,3	198	99	0.000457944	0.0148433	0.6,0.524	0.912,0.944	-0.366
42740	ENSMUSG00000043671.14	Dpy19l3	chr7	-	35721544	35721679	35721544	35721635	35725290	35725436	42740	10,3	4,2	12,10	0,1	143	99	0.000405904	0.0134806	0.634,0.509	1.0,0.874	-0.366
2281	ENSMUSG00000078517.12	Emc1	chr4	+	139364922	139365394	139365194	139365394	139364330	139364339	2281	10,8	5,8	61,53	8,8	198	99	0.000766765	0.0218739	0.5,0.333	0.792,0.768	-0.364
36669	ENSMUSG00000026860.16	Sh3glb2	chr2	-	30346058	30346145	30346058	30346073	30346352	30346453	36669	8,1	19,14	24,18	13,13	171	99	3.392e-05	0.00180783	0.196,0.04	0.517,0.445	-0.363
8890	ENSMUSG00000073434.12	Wdr90	chr17	-	25859099	25859483	25859099	25859318	25859857	25859925	8890	6,7	3,1	17,16	0,0	198	99	0.00096545	0.0262303	0.5,0.778	1.0,1.0	-0.361
13199	ENSMUSG00000002799.6	Jag2	chr12	-	112920071	112920503	112920071	112920480	112921999	112922057	13199	7,5	3,4	8,9	0,1	122	99	0.000238534	0.00891309	0.654,0.504	1.0,0.88	-0.361
44917	ENSMUSG00000039199.6	Zdhhc1	chr8	-	105476038	105476529	105476038	105476136	105477016	105477118	44917	8,6	3,2	16,16	1,0	198	99	0.000367746	0.0124835	0.571,0.6	0.889,1.0	-0.359
5009	ENSMUSG00000033439.12	Trmt13	chr3	-	116582493	116582923	116582493	116582724	116585195	116585270	5009	30,16	23,14	203202	45,28	198	99	1.45721e-07	1.70428e-05	0.395,0.364	0.693,0.783	-0.358
42591	ENSMUSG00000006315.9	Tmem147	chr7	-	30728081	30728556	30728081	30728289	30729201	30729321	42591	14,7	5,3	56,93	2,5	198	99	0.000617461	0.0185794	0.583,0.538	0.933,0.903	-0.358
11099	ENSMUSG00000022253.15	Nadk2	chr15	+	9103000	9103379	9103325	9103379	9100155	9100202	11099	25,19	12,5	14,18	1,0	198	99	1.3257e-05	0.000826573	0.51,0.655	0.875,1.0	-0.355
46485	ENSMUSG00000052566.8	Hook2	chr8	+	85001154	85001237	85001158	85001237	84998203	84998291	46485	5,7	5,4	10,14	2,0	103	99	0.000445758	0.0145224	0.49,0.627	0.828,1.0	-0.355
2596	ENSMUSG00000033955.13	Tnks1bp1	chr2	+	85058059	85059487	85058125	85059487	85051924	85052555	2596	5,6	1,3	11,15	0,0	165	99	0.000986034	0.0265787	0.75,0.545	1.0,1.0	-0.353
43782	ENSMUSG00000021140.9	Pcnx	chr12	+	81950100	81950318	81950149	81950318	81948357	81948415	43782	9,9	2,5	3,3	0,0	148	99	1.60772e-05	0.000974773	0.751,0.546	1.0,1.0	-0.351
25092	ENSMUSG00000116594.1	Gm49601	chr16	-	18623104	18623453	18623104	18623240	18624110	18624212	25092	10,4	5,3	6,3	0,1	198	99	0.00128773	0.032654	0.5,0.4	1.0,0.6	-0.35
6258	ENSMUSG00000054792.15	Klhl18	chr9	-	110436010	110436248	110436010	110436233	110437346	110437483	6258	0,0	4,3	3,5	4,10	114	99	4.3101e-05	0.00221493	0.0,0.0	0.394,0.303	-0.349
44073	ENSMUSG00000027247.16	Arhgap1	chr2	+	91651498	91651823	91651748	91651823	91650221	91650252	44073	13,5	13,5	31,36	6,10	198	99	0.000725534	0.0210122	0.333,0.333	0.721,0.643	-0.349
477	ENSMUSG00000002372.9	Ranbp3	chr17	+	56701022	56702890	56702762	56702890	56696717	56696789	477	253289	76,90	422497	7,8	198	99	0	0	0.625,0.616	0.968,0.969	-0.348
2048	ENSMUSG00000037876.17	Jmjd1c	chr10	+	67218037	67218181	67218116	67218181	67215269	67215375	2048	50,35	25,30	51,55	7,7	178	99	2.65461e-06	0.000211717	0.527,0.394	0.802,0.814	-0.348
13103	ENSMUSG00000024236.18	Svil	chr18	+	5046594	5046877	5046827	5046877	5040227	5040239	13103	15,6	6,1	4,11	0,0	198	99	7.5924e-06	0.000512723	0.556,0.75	1.0,1.0	-0.347
18268	ENSMUSG00000029484.12	Anxa3	chr5	+	96838541	96838706	96838551	96838706	96838292	96838415	18268	0,1	2,1	4,5	4,2	109	99	0.00222829	0.0495221	0.0,0.476	0.476,0.694	-0.347
39977	ENSMUSG00000053470.13	Kdm3a	chr6	-	71632055	71632512	71632055	71632271	71632837	71632990	39977	55,60	73,66	33,29	5,14	198	99	0.000451295	0.0146658	0.274,0.312	0.767,0.509	-0.345
1591	ENSMUSG00000020167.14	Tcf3	chr10	-	80418765	80418818	80418765	80418815	80420020	80420088	1591	9,5	6,4	3,5	0,1	102	99	0.000571107	0.0175525	0.593,0.548	1.0,0.829	-0.344
38280	ENSMUSG00000020526.12	Znhit3	chr11	-	84914210	84914283	84914210	84914280	84916098	84916130	38280	2,0	6,6	20,10	19,13	102	99	0.00115276	0.0302129	0.244,0.0	0.505,0.427	-0.344
20941	ENSMUSG00000037876.17	Jmjd1c	chr10	+	67218089	67218181	67218116	67218181	67215269	67215375	20941	17,12	25,30	16,15	7,7	126	99	0.000272516	0.00982804	0.348,0.239	0.642,0.627	-0.341
12801	ENSMUSG00000037960.11	Card19	chr13	-	49203717	49203884	49203717	49203789	49205191	49205345	12801	98,87	33,63	24,26	1,4	194	99	0.000376711	0.012729	0.602,0.413	0.925,0.768	-0.339
39136	ENSMUSG00000045983.16	Eif4g1	chr16	+	20673911	20674314	20674227	20674314	20673598	20673655	39136	26,27	24,34	85,76	37,11	198	99	0.000148652	0.00605258	0.351,0.284	0.535,0.776	-0.338
3528	ENSMUSG00000005442.13	Cic	chr7	+	25292413	25292568	25292416	25292568	25292063	25292314	3528	51,36	92,80	95,89	64,31	102	99	3.61812e-08	4.83814e-06	0.35,0.304	0.59,0.736	-0.336
12700	ENSMUSG00000021495.10	Fam193b	chr13	-	55552961	55553349	55552961	55553228	55554216	55554448	12700	32,22	11,15	115115	16,6	198	99	3.52873e-05	0.00186507	0.593,0.423	0.782,0.906	-0.336
39139	ENSMUSG00000045983.16	Eif4g1	chr16	+	20673919	20674314	20674227	20674314	20673598	20673655	39139	27,27	24,34	84,77	37,11	198	99	0.000226124	0.00862312	0.36,0.284	0.532,0.778	-0.333
39141	ENSMUSG00000045983.16	Eif4g1	chr16	+	20673942	20674314	20674227	20674314	20673598	20673655	39141	27,27	24,34	84,76	37,11	198	99	0.000227237	0.00864374	0.36,0.284	0.532,0.776	-0.332
28363	ENSMUSG00000029406.15	Pitpnm2	chr5	-	124129163	124129402	124129163	124129362	124130206	124130326	28363	16,9	4,6	20,16	0,1	139	99	3.18126e-05	0.00170985	0.74,0.517	1.0,0.919	-0.331
32352	ENSMUSG00000059981.12	Taok2	chr7	-	126866996	126867421	126866996	126867179	126868109	126868322	32352	5,1	14,4	20,26	15,12	198	99	0.000462846	0.0149695	0.152,0.111	0.4,0.52	-0.329
47265	ENSMUSG00000027752.15	Exosc8	chr3	-	54733657	54733744	54733657	54733731	54734295	54734802	47265	11,7	5,6	16,22	2,1	112	99	0.000554648	0.0172612	0.66,0.508	0.876,0.951	-0.329
10232	ENSMUSG00000036167.16	Pphln1	chr15	+	93399005	93399493	93399226	93399493	93398431	93398461	10232	1,3	54,41	5,3	2,9	198	99	0.00029799	0.0105417	0.009,0.035	0.556,0.143	-0.328
12253	ENSMUSG00000033111.16	3830406C13Rik	chr14	+	12301398	12301488	12301401	12301488	12301147	12301246	12253	6,4	2,4	16,14	2,0	102	99	0.00219014	0.0488678	0.744,0.493	0.886,1.0	-0.325
45802	ENSMUSG00000031516.11	Dctn6	chr8	-	34104985	34105101	34104985	34105039	34106341	34106406	45802	1,4	11,11	11,18	10,12	161	99	0.000325426	0.0113396	0.053,0.183	0.403,0.48	-0.324
27226	ENSMUSG00000027944.13	Hax1	chr3	-	89997519	89998103	89997519	89997997	89998527	89998780	27226	17,13	9,16	44,43	7,11	198	99	0.00117278	0.0305289	0.486,0.289	0.759,0.662	-0.323
35955	ENSMUSG00000033808.16	Tmem87a	chr2	-	120362878	120362997	120362878	120362937	120363361	120363435	35955	1,0	2,2	5,9	4,7	159	99	0.000813233	0.0229495	0.237,0.0	0.438,0.445	-0.323
6460	ENSMUSG00000025332.14	Kdm5c	chrX	+	152271865	152272274	152272074	152272274	152271011	152271593	6460	22,21	8,3	9,19	0,0	198	99	7.12425e-06	0.000485529	0.579,0.778	1.0,1.0	-0.322
31214	ENSMUSG00000031078.15	Cttn	chr7	-	144449550	144450021	144449550	144449615	144452026	144452137	31214	33,34	122,89	208152	100108	198	99	1.11022e-16	5.74515e-14	0.119,0.16	0.51,0.413	-0.322
38124	ENSMUSG00000049971.17	Glt1d1	chr5	+	127663717	127664076	127664012	127664076	127663341	127663378	38124	11,10	5,1	2,1	0,0	198	99	5.60612e-05	0.00276902	0.524,0.833	1.0,1.0	-0.322
11061	ENSMUSG00000024191.15	Bnip1	chr17	+	26783243	26783537	26783444	26783537	26782577	26782631	11061	3,3	2,2	2,6	1,0	198	99	0.00164451	0.0394318	0.429,0.429	0.5,1.0	-0.321
12605	ENSMUSG00000021482.10	Prxl2c	chr13	-	64297015	64297179	64297015	64297174	64297254	64297386	12605	27,35	37,33	18,25	10,2	104	99	0.00179484	0.0419516	0.41,0.502	0.631,0.922	-0.321
47290	ENSMUSG00000071302.10	2610044O15Rik8	chr8	-	129221543	129221904	129221543	129221604	129233904	129234046	47290	0,0	1,3	8,9	12,7	198	99	6.1372e-05	0.00298823	0.0,0.0	0.25,0.391	-0.321
5004	ENSMUSG00000058290.4	Espl1	chr15	+	102296730	102296849	102296759	102296849	102296304	102296639	5004	23,4	6,3	10,11	0,1	128	99	0.000511483	0.0161436	0.748,0.508	1.0,0.895	-0.32
31614	ENSMUSG00000026203.16	Dnajb2	chr1	+	75244562	75244804	75244793	75244804	75243457	75243661	31614	17,12	96,83	54,45	28,53	198	99	2.50539e-10	5.65977e-08	0.081,0.067	0.491,0.298	-0.32
36074	ENSMUSG00000086416.1	Gm14002	chr2	-	125207528	125210111	125207528	125207865	125211664	125211739	36074	0,1	6,3	56,40	35,39	198	99	1.37204e-05	0.000851602	0.0,0.143	0.444,0.339	-0.32
5157	ENSMUSG00000037262.7	Kin	chr2	+	10090112	10090363	10090240	10090363	10085729	10085824	5157	28,23	10,6	97107	2,5	198	99	1.56822e-06	0.000132179	0.583,0.657	0.96,0.915	-0.318
45051	ENSMUSG00000031068.8	Glrx3	chr7	+	137458842	137459295	137459194	137459295	137453412	137453614	45051	0,0	3,2	2,5	3,4	198	99	6.9705e-05	0.00331773	0.0,0.0	0.25,0.385	-0.318
42838	ENSMUSG00000046364.14	Rpl27a	chr7	+	109520404	109520567	109520541	109520567	109519917	109519993	42838	12,13	6,1	4,7	0,0	198	99	4.83358e-05	0.00242787	0.5,0.867	1.0,1.0	-0.317
13709	ENSMUSG00000060073.9	Psma3	chr12	+	70984437	70984594	70984496	70984594	70983323	70983442	13709	27,32	32,44	125112	43,39	158	99	1.62311e-08	2.36057e-06	0.346,0.313	0.646,0.643	-0.315
28883	ENSMUSG00000028041.17	Adam15	chr3	-	89347151	89347483	89347151	89347228	89347868	89347945	28883	12,7	19,16	14,22	9,7	198	99	0.00113466	0.0298614	0.24,0.179	0.438,0.611	-0.315
2503	ENSMUSG00000026812.16	Tsc1	chr2	+	28678951	28679118	28678966	28679118	28678161	28678205	2503	20,25	19,28	34,52	9,13	114	99	8.68071e-06	0.000580582	0.478,0.437	0.766,0.776	-0.314
23509	ENSMUSG00000030309.16	Caprin2	chr6	-	148887670	148887794	148887670	148887790	148890608	148890671	23509	0,0	2,1	4,1	4,6	103	99	0.000384826	0.0129004	0.0,0.0	0.49,0.138	-0.314
31213	ENSMUSG00000031078.15	Cttn	chr7	-	144449550	144450017	144449550	144449615	144452026	144452137	31213	31,34	122,89	202143	100108	198	99	9.99201e-16	4.73058e-13	0.113,0.16	0.502,0.398	-0.314
42587	ENSMUSG00000006315.9	Tmem147	chr7	-	30728081	30728568	30728081	30728289	30729201	30729271	42587	14,10	5,3	56,93	2,5	198	99	0.00124358	0.031788	0.583,0.625	0.933,0.903	-0.314
24	ENSMUSG00000051323.16	Pcdh19	chrX	-	133625268	133625441	133625268	133625438	133632894	133632953	24	10,9	30,22	14,19	8,17	102	99	0.000713841	0.0207499	0.244,0.284	0.629,0.52	-0.31
40148	ENSMUSG00000001436.15	Slc19a1	chr10	+	77044622	77044720	77044641	77044720	77042790	77042974	40148	0,1	2,2	10,7	10,7	118	99	0.00141598	0.0352631	0.0,0.296	0.456,0.456	-0.308
17072	ENSMUSG00000034667.8	Xpot	chr10	-	121614990	121615217	121614990	121615147	121616614	121616684	17072	14,9	15,23	26,49	14,17	169	99	0.00038431	0.0128981	0.353,0.186	0.521,0.628	-0.305
24416	ENSMUSG00000116275.1	Zc3h11a	chr1	-	133653972	133654438	133653972	133654032	133661236	133661380	24416	22,11	33,28	41,28	11,24	198	99	0.00207437	0.0468371	0.25,0.164	0.651,0.368	-0.303
1870	ENSMUSG00000040606.13	Kazn	chr4	-	142147017	142147148	142147017	142147145	142150845	142151035	1870	0,0	3,1	1,5	4,7	102	99	8.09377e-05	0.00375989	0.0,0.0	0.195,0.409	-0.302
2095	ENSMUSG00000038524.13	Fchsd1	chr18	-	37967759	37967901	37967759	37967895	37968213	37968281	2095	0,1	16,34	5,8	12,14	105	99	5.22129e-07	5.14077e-05	0.0,0.027	0.282,0.35	-0.302
5970	ENSMUSG00000025558.18	Dock9	chr14	-	121597641	121597756	121597641	121597753	121599687	121599821	5970	21,13	37,26	23,31	18,11	102	99	0.000617183	0.0185794	0.355,0.327	0.554,0.732	-0.302
36402	ENSMUSG00000020576.10	Nbas	chr12	+	13441858	13441946	13441861	13441946	13441466	13441580	36402	28,23	44,55	31,15	14,10	102	99	5.89786e-05	0.00288749	0.382,0.289	0.682,0.593	-0.302
48442	ENSMUSG00000025041.17	Nt5c2	chr19	-	46898327	46898542	46898327	46898415	46898621	46898679	48442	1,0	2,3	7,4	8,2	198	99	0.0010593	0.0280941	0.2,0.0	0.304,0.5	-0.302
31639	ENSMUSG00000033021.16	Gmppa	chr1	+	75436153	75436312	75436193	75436312	75435981	75436011	31639	7,4	3,5	2,6	1,0	139	99	0.00143891	0.0357543	0.624,0.363	0.588,1.0	-0.301
39773	ENSMUSG00000029913.14	Prdm5	chr6	+	65861090	65861566	65861448	65861566	65859356	65859478	39773	0,1	2,0	3,3	1,0	198	99	0.00153608	0.037525	0.0,1.0	0.6,1.0	-0.3
37422	ENSMUSG00000044005.13	Gls2	chr10	+	128203783	128203855	128203822	128203855	128201558	128201617	37422	30,18	175173	141151	134204	138	99	0	0	0.11,0.069	0.43,0.347	-0.299
3208	ENSMUSG00000030091.17	Nup210	chr6	-	91013069	91014496	91013069	91013316	91015823	91015907	3208	18,15	3,6	79,65	3,1	198	99	0.000241457	0.00897707	0.75,0.556	0.929,0.97	-0.296
22136	ENSMUSG00000022587.14	Ly6e	chr15	+	74957334	74957463	74957414	74957463	74955671	74955717	22136	0,0	2,1	1,7	3,5	179	99	7.18244e-05	0.00339037	0.0,0.0	0.156,0.436	-0.296
22271	ENSMUSG00000031145.15	Prickle3	chrX	+	7663170	7663578	7663464	7663578	7659535	7659719	22271	3,3	18,24	17,6	13,6	198	99	6.92848e-06	0.000473638	0.077,0.059	0.395,0.333	-0.296
29645	ENSMUSG00000039824.4	Myl6b	chr10	-	128497200	128497417	128497200	128497398	128498627	128498685	29645	17,10	4,5	10,4	0,0	118	99	2.97385e-05	0.00161989	0.781,0.627	1.0,1.0	-0.296
6254	ENSMUSG00000030276.19	Ttll3	chr6	+	113394580	113394860	113394691	113394860	113393102	113393194	6254	1,0	10,4	10,4	7,7	198	99	3.86675e-05	0.00201737	0.048,0.0	0.417,0.222	-0.295
42223	ENSMUSG00000051768.9	Xrcc1	chr7	+	24570816	24570926	24570874	24570926	24570529	24570578	42223	28,15	13,12	42,30	6,5	157	99	0.00101481	0.0271734	0.576,0.441	0.815,0.791	-0.294
12601	ENSMUSG00000021483.8	Cdk20	chr13	+	64437590	64438025	64437876	64438025	64437388	64437512	12601	2,0	9,9	17,23	18,20	198	99	9.58493e-06	0.000629142	0.1,0.0	0.321,0.365	-0.293
2319	ENSMUSG00000036864.16	Proser3	chr7	-	30546124	30546228	30546124	30546225	30546302	30546427	2319	0,0	7,5	7,5	15,13	102	99	2.45941e-05	0.00139784	0.0,0.0	0.312,0.272	-0.292
49758	ENSMUSG00000032480.17	Dhx30	chr9	-	110115035	110115211	110115035	110115155	110115490	110115582	49758	13,9	21,28	15,13	10,7	155	99	0.00142215	0.0353774	0.283,0.17	0.489,0.543	-0.29
2291	ENSMUSG00000020389.19	Cdkl3	chr11	+	52004909	52005092	52004912	52005092	52004240	52004417	2291	0,0	8,8	7,2	16,5	102	99	1.94344e-05	0.00115165	0.0,0.0	0.298,0.28	-0.289
5039	ENSMUSG00000035632.16	Cnot3	chr7	+	3653144	3653419	3653196	3653419	3652032	3652128	5039	4,7	18,17	24,19	17,17	151	99	0.000348377	0.0119721	0.127,0.213	0.481,0.423	-0.282
14564	ENSMUSG00000020747.17	Tmem94	chr11	+	115777294	115777377	115777298	115777377	115765441	115765487	14564	8,5	6,3	3,4	1,0	103	99	0.00106615	0.0282421	0.562,0.616	0.742,1.0	-0.282
14598	ENSMUSG00000018858.15	Mrpl58	chr11	+	115409980	115410251	115410059	115410251	115403781	115403960	14598	11,13	4,2	36,50	1,0	178	99	8.97846e-05	0.00406893	0.605,0.783	0.952,1.0	-0.282
43454	ENSMUSG00000001909.16	Trmt1	chr8	+	84690703	84690933	84690801	84690933	84690516	84690572	43454	32,19	19,18	75,63	13,19	197	99	0.000605782	0.0183146	0.458,0.347	0.744,0.625	-0.282
37749	ENSMUSG00000020326.7	Ccng1	chr11	-	40751260	40751515	40751260	40751359	40752103	40752357	37749	14,15	27,21	84100	47,40	198	99	7.9641e-06	0.000536197	0.206,0.263	0.472,0.556	-0.28
592	ENSMUSG00000062906.12	Hdac10	chr15	-	89124174	89124428	89124174	89124253	89124531	89124588	592	7,5	17,14	68,58	37,43	198	99	4.61269e-05	0.00234069	0.171,0.152	0.479,0.403	-0.279
1028	ENSMUSG00000021240.6	Abcd4	chr12	-	84612324	84612583	84612324	84612450	84612779	84612896	1028	1,2	31,26	25,10	15,27	198	99	1.03921e-06	9.32422e-05	0.016,0.037	0.455,0.156	-0.279
3851	ENSMUSG00000015790.16	Surf1	chr2	-	26915595	26915784	26915595	26915769	26915954	26916006	3851	2,3	69,80	18,9	22,31	114	99	1.78509e-08	2.56264e-06	0.025,0.032	0.415,0.201	-0.279
4630	ENSMUSG00000038225.15	Primpol	chr8	-	46592592	46593703	46592592	46592755	46599718	46599866	4630	31,22	5,5	57,43	0,0	198	99	5.99819e-07	5.7904e-05	0.756,0.688	1.0,1.0	-0.278
23599	ENSMUSG00000028081.6	Rps3a1	chr3	-	86140445	86140682	86140445	86140546	86141238	86141426	23599	0,0	2,4	4,4	7,4	198	99	0.000114154	0.00492428	0.0,0.0	0.222,0.333	-0.278
25432	ENSMUSG00000026927.17	Entr1	chr2	-	26388915	26389065	26388915	26389027	26389148	26389316	25432	10,16	5,2	5,11	0,0	137	99	7.15784e-05	0.00338878	0.591,0.853	1.0,1.0	-0.278
34256	ENSMUSG00000037652.15	Phc3	chr3	-	30936284	30937156	30936284	30936661	30942408	30942652	34256	30,32	5,7	15,11	0,0	198	99	2.16688e-05	0.00125564	0.75,0.696	1.0,1.0	-0.277
5758	ENSMUSG00000013878.18	Rnf170	chr8	+	26120439	26120563	26120444	26120563	26119663	26119959	5758	18,20	17,12	33,21	8,3	104	99	0.000981589	0.0265232	0.502,0.613	0.797,0.87	-0.276
42225	ENSMUSG00000051768.9	Xrcc1	chr7	+	24570828	24570926	24570874	24570926	24570529	24570578	42225	28,16	13,12	40,30	6,5	145	99	0.00138321	0.0346799	0.595,0.477	0.82,0.804	-0.276
25609	ENSMUSG00000038546.9	Ranbp9	chr13	-	43425029	43425214	43425029	43425126	43434813	43434981	25609	10,10	2,2	10,10	0,0	187	99	0.00156359	0.037962	0.726,0.726	1.0,1.0	-0.274
5098	ENSMUSG00000038780.14	Smurf1	chr5	-	144880624	144880709	144880624	144880700	144881617	144881819	5098	501387	375350	124136	29,31	108	99	1.66089e-13	6.00933e-11	0.55,0.503	0.797,0.801	-0.273
6690	ENSMUSG00000008682.13	Rpl10	chrX	+	74272682	74273085	74272914	74273085	74272178	74272317	6690	106,87	29,31	182194	0,28	198	99	2.56912e-06	0.000205636	0.646,0.584	1.0,0.776	-0.273
38526	ENSMUSG00000028099.8	Polr3c	chr3	-	96723796	96724085	96723796	96723992	96725833	96725999	38526	0,0	8,3	3,4	6,4	192	99	7.96485e-05	0.00371239	0.0,0.0	0.205,0.34	-0.273
22333	ENSMUSG00000026939.12	Tmem141	chr2	-	25621308	25621755	25621308	25621674	25621933	25622005	22333	1,3	13,11	17,13	11,21	180	99	0.000589927	0.0179973	0.041,0.13	0.459,0.254	-0.271
3382	ENSMUSG00000053253.16	Ndfip2	chr14	+	105298002	105304836	105304730	105304836	105294798	105294892	3382	384359	71,74	964975	5,6	198	99	0	0	0.73,0.708	0.99,0.988	-0.27
21076	ENSMUSG00000025967.16	Eef1b2	chr1	+	63178422	63178565	63178438	63178565	63177722	63178208	21076	181151	71,47	293294	8,2	115	99	0	0	0.687,0.734	0.969,0.992	-0.27
24548	ENSMUSG00000026728.9	Vim	chr2	+	13574393	13574833	13574469	13574833	13573926	13574060	24548	43,24	5,8	13,18	0,0	175	99	2.14009e-05	0.00124334	0.83,0.629	1.0,1.0	-0.27
2114	ENSMUSG00000029209.15	Gnpda2	chr5	-	69579507	69582293	69579507	69579686	69584973	69585156	2114	2,6	18,18	51,47	39,46	198	99	6.27973e-06	0.000437351	0.053,0.143	0.395,0.338	-0.269
6689	ENSMUSG00000008682.13	Rpl10	chrX	+	74272678	74273085	74272914	74273085	74272178	74272317	6689	108,89	29,31	182196	0,28	198	99	2.92607e-06	0.000228454	0.651,0.589	1.0,0.778	-0.269
33622	ENSMUSG00000031320.9	Rps4x	chrX	-	102187626	102188024	102187626	102187972	102188293	102188371	33622	0,0	13,7	1,4	4,4	151	99	0.000625872	0.0187816	0.0,0.0	0.141,0.396	-0.269
34496	ENSMUSG00000052293.14	Taf9	chr13	+	100654165	100654283	100654190	100654283	100651624	100651828	34496	17,20	43,31	43,33	33,17	124	99	0.000226549	0.00863193	0.24,0.34	0.51,0.608	-0.269
26157	ENSMUSG00000037270.18	4932438A13Rik	chr3	+	37033261	37033401	37033264	37033401	37032364	37032526	26157	18,16	6,6	10,11	0,0	102	99	1.13412e-05	0.000722059	0.744,0.721	1.0,1.0	-0.268
10287	ENSMUSG00000015377.10	Dennd6b	chr15	-	89186362	89186486	89186362	89186427	89186753	89186819	10287	2,1	14,17	18,13	19,21	158	99	1.84655e-05	0.00110453	0.082,0.036	0.372,0.279	-0.267
60	ENSMUSG00000036022.15	Fam122b	chrX	-	53258956	53259021	53258956	53259018	53259840	53259926	60	0,1	1,7	5,2	10,4	102	99	0.00213564	0.0479691	0.0,0.122	0.327,0.327	-0.266
17912	ENSMUSG00000023175.15	Bsg	chr10	+	79710242	79710402	79710269	79710402	79710057	79710140	17912	37,26	10,13	6,10	0,1	126	99	0.000274682	0.00988211	0.744,0.611	1.0,0.887	-0.266
27658	ENSMUSG00000003452.15	Bicd1	chr6	+	149550339	149550425	149550349	149550425	149518905	149519113	27658	0,0	3,4	6,1	6,16	109	99	0.000502785	0.0159256	0.0,0.0	0.476,0.054	-0.265
719	ENSMUSG00000022098.10	Bmp1	chr14	-	70486146	70486930	70486146	70486272	70490019	70490200	719	218195	395322	497384	179293	198	99	3.53577e-07	3.6173e-05	0.216,0.232	0.581,0.396	-0.264
4970	ENSMUSG00000030346.16	Rad51ap1	chr6	-	126927537	126927690	126927537	126927687	126929992	126930102	4970	24,19	5,10	4,2	0,0	102	99	0.00014527	0.00596578	0.823,0.648	1.0,1.0	-0.264
11262	ENSMUSG00000022111.9	Uchl3	chr14	+	101694763	101695217	101695158	101695217	101666991	101667077	11262	36,50	15,2	126171	0,0	198	99	1.80012e-07	2.03844e-05	0.545,0.926	1.0,1.0	-0.264
31034	ENSMUSG00000008855.17	Hdac5	chr11	-	102218415	102218812	102218415	102218487	102224733	102224955	31034	52,67	165125	30,49	34,19	198	99	0.000418342	0.0137983	0.136,0.211	0.306,0.563	-0.261
10930	ENSMUSG00000037119.4	Fam91a1	chr15	+	58429923	58430217	58430178	58430217	58427053	58427116	10930	13,10	2,2	35,41	0,0	198	99	0.00183029	0.0425399	0.765,0.714	1.0,1.0	-0.26
20573	ENSMUSG00000026383.14	Epb41l5	chr1	-	119549886	119550017	119549886	119550014	119550521	119550563	20573	18,7	7,3	10,13	0,1	102	99	0.000157446	0.00638727	0.714,0.694	1.0,0.927	-0.26
19696	ENSMUSG00000037791.15	Phf12	chr11	+	78024812	78025086	78024960	78025086	78023619	78023819	19696	25,10	104,90	67,57	80,46	198	99	8.38885e-13	2.84984e-10	0.107,0.053	0.295,0.383	-0.259
34300	ENSMUSG00000032456.13	Nmnat3	chr9	+	98354018	98354164	98354021	98354164	98296813	98296980	34300	42,53	42,29	150150	36,26	102	99	2.67999e-06	0.000212978	0.493,0.639	0.802,0.848	-0.259
31035	ENSMUSG00000008855.17	Hdac5	chr11	-	102218415	102218819	102218415	102218487	102224733	102224955	31035	56,68	165125	30,49	34,19	198	99	0.000597061	0.0181496	0.145,0.214	0.306,0.563	-0.255
48780	ENSMUSG00000042286.13	Stab1	chr14	-	31146297	31146429	31146297	31146345	31146666	31146789	48780	1,0	30,16	8,3	7,10	183	99	6.53554e-06	0.000449538	0.018,0.0	0.382,0.14	-0.252
1654	ENSMUSG00000039994.15	Timeless	chr10	+	128250284	128250462	128250287	128250462	128249967	128250110	1654	70,43	46,41	93,89	25,19	102	99	2.01023e-06	0.000165667	0.596,0.504	0.783,0.82	-0.251
1910	ENSMUSG00000037692.14	Ahdc1	chr4	+	133060661	133060892	133060675	133060892	133055012	133055203	1910	5,4	71,49	7,3	13,6	113	99	0.000633197	0.0189376	0.058,0.067	0.321,0.305	-0.251
3156	ENSMUSG00000020682.17	Mmp28	chr11	-	83451659	83451839	83451659	83451739	83462747	83463071	3156	0,0	10,9	3,6	6,7	198	99	1.43262e-05	0.000883594	0.0,0.0	0.2,0.3	-0.25
11418	ENSMUSG00000022098.10	Bmp1	chr14	-	70486146	70486605	70486146	70486272	70490019	70490200	11418	18,14	395322	192140	179293	198	99	0	0	0.022,0.021	0.349,0.193	-0.25
18731	ENSMUSG00000030990.18	Pgap2	chr7	+	102235691	102235872	102235832	102235872	102226421	102226445	18731	9,10	0,5	5,4	0,0	198	99	0.00158224	0.0383103	1.0,0.5	1.0,1.0	-0.25
907	ENSMUSG00000034928.16	Rnf44	chr13	-	54683042	54683219	54683042	54683216	54683594	54683762	907	23,27	84,45	47,24	31,25	102	99	0.000392253	0.0131036	0.21,0.368	0.595,0.482	-0.249
4309	ENSMUSG00000039678.12	Tbc1d13	chr2	+	30135368	30135552	30135408	30135552	30134796	30134870	4309	2,2	19,13	16,10	15,23	139	99	0.000674559	0.0199071	0.07,0.099	0.432,0.236	-0.249
11732	ENSMUSG00000044501.17	Zfp758	chr17	+	22372008	22372088	22372035	22372088	22361521	22361707	11732	0,1	3,1	8,23	17,9	126	99	0.00206878	0.0467583	0.0,0.44	0.27,0.668	-0.249
32423	ENSMUSG00000053332.13	Gas5	chr1	+	161036525	161036579	161036548	161036579	161035982	161036014	32423	5,2	244260	150124	315315	122	99	0	0	0.016,0.006	0.279,0.242	-0.249
38240	ENSMUSG00000004929.12	Thop1	chr10	+	81077556	81078015	81077915	81078015	81076942	81077050	38240	0,1	15,19	4,2	3,7	198	99	0.00056301	0.0173998	0.0,0.026	0.4,0.125	-0.249
2036	ENSMUSG00000013787.15	Ehmt2	chr17	+	34905609	34906058	34905909	34906058	34905341	34905456	2036	491469	455408	407395	147116	198	99	8.88178e-15	3.76444e-12	0.35,0.365	0.581,0.63	-0.248
37676	ENSMUSG00000031691.14	Tnpo2	chr8	+	85038185	85038489	85038377	85038489	85036914	85036977	37676	282230	214184	155137	35,48	198	99	1.16353e-07	1.38822e-05	0.397,0.385	0.689,0.588	-0.247
11443	ENSMUSG00000022090.10	Pdlim2	chr14	-	70167660	70167811	70167660	70167785	70167964	70168394	11443	1,1	9,4	14,14	20,18	125	99	0.00186284	0.0430884	0.081,0.165	0.357,0.381	-0.246
13713	ENSMUSG00000060073.9	Psma3	chr12	+	70984461	70984594	70984496	70984594	70983323	70983442	13713	40,47	32,44	139127	43,39	134	99	3.09227e-06	0.000237677	0.48,0.441	0.705,0.706	-0.245
771	ENSMUSG00000004562.16	Arhgef40	chr14	+	52005158	52005623	52005340	52005623	52004988	52005035	771	31,28	74,72	148124	113,83	198	99	4.74827e-10	1.01592e-07	0.173,0.163	0.396,0.428	-0.244
35563	ENSMUSG00000025157.8	Zdhhc16	chr19	+	41934741	41934883	41934807	41934883	41933521	41933665	35563	15,19	1,8	45,62	0,1	165	99	2.57273e-05	0.00144381	0.9,0.588	1.0,0.974	-0.243
10078	ENSMUSG00000009733.9	Tfcp2	chr15	-	100551324	100551506	100551324	100551481	100551909	100552008	10078	0,0	18,7	0,13	5,11	124	99	0.000164289	0.0066166	0.0,0.0	0.0,0.485	-0.242
27601	ENSMUSG00000028676.17	Srsf10	chr4	+	135861770	135861877	135861780	135861877	135858841	135859201	27601	83,67	25,26	95,71	3,2	109	99	4.58427e-11	1.22164e-08	0.751,0.701	0.966,0.97	-0.242
46279	ENSMUSG00000031808.7	Slc27a1	chr8	+	71580459	71580876	71580701	71580876	71580144	71580214	46279	38,43	8,5	158,74	0,0	198	99	7.64719e-09	1.20255e-06	0.704,0.811	1.0,1.0	-0.242
5342	ENSMUSG00000063511.11	Snrnp70	chr7	-	45380716	45383184	45380716	45380818	45383803	45383885	5342	74,63	972838	921532	8171102	198	99	0	0	0.037,0.036	0.36,0.194	-0.241
5590	ENSMUSG00000032547.12	Ryk	chr9	+	102885993	102886128	102886002	102886128	102881653	102881754	5590	232210	405386	282296	191193	108	99	8.70415e-14	3.22801e-11	0.344,0.333	0.575,0.584	-0.241
1996	ENSMUSG00000014158.12	Trpv4	chr5	-	114628807	114629020	114628807	114628973	114629949	114630023	1996	0,0	1,2	6,3	7,16	146	99	0.00031784	0.0111197	0.0,0.0	0.368,0.113	-0.24
46960	ENSMUSG00000055835.10	Zfp1	chr8	+	111666057	111666204	111666077	111666204	111658385	111658441	46960	2,1	29,19	27,12	34,46	119	99	4.59306e-05	0.00233339	0.054,0.042	0.398,0.178	-0.24
46282	ENSMUSG00000031808.7	Slc27a1	chr8	+	71580510	71580876	71580701	71580876	71580144	71580214	46282	38,45	8,5	158,76	0,0	198	99	9.53923e-09	1.46296e-06	0.704,0.818	1.0,1.0	-0.239
662	ENSMUSG00000022570.7	Tsta3	chr15	-	75926966	75927123	75926966	75927095	75928891	75929049	662	24,10	3,6	37,24	0,2	127	99	0.000745229	0.0213829	0.862,0.565	1.0,0.903	-0.238
925	ENSMUSG00000021431.15	Snrnp48	chr13	+	38214604	38216513	38216324	38216513	38211066	38211141	925	10,3	558393	155115	214200	198	99	0	0	0.009,0.004	0.266,0.223	-0.238
3287	ENSMUSG00000039852.17	Rere	chr4	+	150619000	150619205	150619024	150619205	150618405	150618552	3287	5,5	57,57	18,7	18,29	123	99	0.000335779	0.011622	0.066,0.066	0.446,0.163	-0.238
8122	ENSMUSG00000066057.7	Gm1976	chr17	-	94820335	94820741	94820335	94820396	94834691	94834799	8122	8,6	24,15	96,85	72,68	198	99	3.41521e-05	0.00181431	0.143,0.167	0.4,0.385	-0.238
19256	ENSMUSG00000029036.18	Atad3a	chr4	-	155748670	155748988	155748670	155748826	155749156	155749343	19256	0,0	2,3	2,3	6,3	198	99	0.00183022	0.0425399	0.0,0.0	0.143,0.333	-0.238
3904	ENSMUSG00000023991.16	Foxp4	chr17	-	47878283	47878497	47878283	47878494	47878606	47878754	3904	25,31	21,16	40,23	7,5	102	99	0.000852512	0.0238163	0.536,0.653	0.847,0.817	-0.237
19108	ENSMUSG00000109378.1	Gm49396	chr7	+	30563531	30563619	30563556	30563619	30563354	30563399	19108	53,45	18,19	262281	18,23	124	99	9.08997e-09	1.39976e-06	0.702,0.654	0.921,0.907	-0.236
29239	ENSMUSG00000069895.4	Atxn1l	chr8	-	109733515	109733745	109733515	109733742	109735304	109735363	29239	5,5	65,53	26,13	38,43	102	99	1.10365e-05	0.000704674	0.069,0.084	0.399,0.227	-0.236
42848	ENSMUSG00000046364.14	Rpl27a	chr7	+	109520475	109520567	109520541	109520567	109519917	109519993	42848	17,15	6,1	10,10	0,0	165	99	0.000110007	0.00479493	0.63,0.9	1.0,1.0	-0.235
48976	ENSMUSG00000032582.14	Rbm6	chr9	-	107853359	107853674	107853359	107853562	107860348	107860459	48976	21,13	1,4	20,17	0,0	198	99	0.00082148	0.0231089	0.913,0.619	1.0,1.0	-0.234
28251	ENSMUSG00000027751.13	Supt20	chr3	+	54716637	54717645	54717338	54717645	54715533	54715689	28251	14,9	112,89	33,21	36,30	198	99	9.26292e-12	2.80427e-09	0.059,0.048	0.314,0.259	-0.233
29606	ENSMUSG00000027384.6	Ndufaf5	chr2	+	140199341	140199460	140199364	140199460	140193582	140193643	29606	0,0	9,4	2,10	24,12	122	99	0.000190907	0.00748539	0.0,0.0	0.063,0.403	-0.233
49530	ENSMUSG00000033629.6	Hacd3	chr9	-	65000061	65000194	65000061	65000177	65000980	65001091	49530	0,0	1,3	7,11	28,23	116	99	0.000267967	0.00971118	0.0,0.0	0.176,0.29	-0.233
3236	ENSMUSG00000026135.17	Zfp142	chr1	-	74579324	74579927	74579324	74579618	74585383	74585697	3236	9,17	2,3	17,16	1,0	198	99	0.00211636	0.0477124	0.692,0.739	0.895,1.0	-0.232
47291	ENSMUSG00000071302.10	2610044O15Rik8	chr8	-	129221543	129221990	129221543	129221604	129233904	129234046	47291	0,0	1,3	6,5	12,7	198	99	0.000229861	0.00871337	0.0,0.0	0.2,0.263	-0.232
1341	ENSMUSG00000020886.17	Dlg4	chr11	+	70030594	70030654	70030603	70030654	70030398	70030452	1341	149130	80,57	47,68	6,8	108	99	4.19305e-07	4.23137e-05	0.631,0.676	0.878,0.886	-0.229
36196	ENSMUSG00000055681.14	Cope	chr8	+	70306292	70306651	70306498	70306651	70304633	70304696	36196	43,34	9,6	53,59	1,2	198	99	9.07136e-05	0.00409435	0.705,0.739	0.964,0.937	-0.229
2065	ENSMUSG00000045672.15	Col27a1	chr4	+	63318191	63318315	63318261	63318315	63317983	63318037	2065	0,0	7,4	5,3	6,12	169	99	0.000181814	0.00718587	0.0,0.0	0.328,0.128	-0.228
1179	ENSMUSG00000020776.18	Fbf1	chr11	-	116152476	116152947	116152476	116152944	116153952	116154052	1179	24,23	25,22	68,64	23,27	102	99	0.00050578	0.0159977	0.482,0.504	0.742,0.697	-0.227
1521	ENSMUSG00000005682.9	Pan2	chr10	+	128315486	128315657	128315513	128315657	128315097	128315236	1521	18,11	49,43	22,30	32,24	126	99	0.000883156	0.0245184	0.224,0.167	0.351,0.495	-0.227
6807	ENSMUSG00000054737.11	Zfp182	chrX	-	21060502	21060654	21060502	21060557	21061893	21062003	6807	0,0	2,2	4,2	6,4	196	99	0.00103151	0.0275873	0.0,0.0	0.252,0.202	-0.227
2002	ENSMUSG00000024392.17	Bag6	chr17	+	35142922	35143010	35142925	35143010	35142726	35142839	2002	175184	489447	130138	128135	102	99	2.15596e-11	6.11127e-09	0.258,0.285	0.496,0.498	-0.226
18318	ENSMUSG00000024556.4	Me2	chr18	-	73791608	73791700	73791608	73791694	73791800	73791910	18318	18,28	8,4	8,16	0,0	105	99	4.14136e-05	0.00214306	0.68,0.868	1.0,1.0	-0.226
47551	ENSMUSG00000025271.13	Pfkfb1	chrX	+	150589939	150590084	150589952	150590084	150588944	150589044	47551	0,0	2,3	17,18	44,66	112	99	0.000211242	0.00813929	0.0,0.0	0.255,0.194	-0.225
14923	ENSMUSG00000018160.15	Med1	chr11	-	98153010	98153125	98153010	98153025	98158328	98158469	14923	10,13	1,4	13,18	0,1	198	99	0.0020515	0.0464858	0.833,0.619	1.0,0.9	-0.224
41524	ENSMUSG00000035585.16	Tsen34	chr7	+	3694931	3695093	3694940	3695093	3694597	3694844	41524	10,13	4,2	3,1	0,0	108	99	0.000275664	0.00989346	0.696,0.856	1.0,1.0	-0.224
18358	ENSMUSG00000055204.15	Ankrd17	chr5	-	90278242	90278407	90278242	90278388	90282850	90283603	18358	9,13	52,58	11,11	13,20	118	99	0.00187551	0.0432915	0.127,0.158	0.415,0.316	-0.223
3999	ENSMUSG00000060373.15	Hnrnpc	chr14	-	52075254	52075436	52075254	52075412	52075612	52075726	3999	12361116	598520	28932903	419397	123	99	0	0	0.625,0.633	0.847,0.855	-0.222
30909	ENSMUSG00000027206.13	Cops2	chr2	-	125842621	125842732	125842621	125842711	125848268	125848284	30909	147131	77,54	117122	12,20	120	99	1.49133e-08	2.18318e-06	0.612,0.667	0.889,0.834	-0.222
48440	ENSMUSG00000025041.17	Nt5c2	chr19	-	46898327	46898512	46898327	46898415	46898621	46898679	48440	1,0	2,3	7,2	8,2	196	99	0.00179905	0.042028	0.202,0.0	0.307,0.336	-0.221
45517	ENSMUSG00000031447.7	Lamp1	chr8	+	13165845	13165967	13165851	13165967	13159160	13159434	45517	61,50	25,24	54,40	6,4	105	99	2.23803e-05	0.00129014	0.697,0.663	0.895,0.904	-0.22
591	ENSMUSG00000053137.7	Mapk11	chr15	-	89145095	89145232	89145095	89145175	89145374	89145446	591	1,0	32,34	52,35	83106	156	99	1.33891e-10	3.16943e-08	0.019,0.0	0.284,0.173	-0.219
663	ENSMUSG00000022570.7	Tsta3	chr15	-	75926966	75927198	75926966	75927095	75928891	75929049	663	34,23	3,6	85,70	0,2	198	99	8.15548e-05	0.00378066	0.85,0.657	1.0,0.946	-0.219
4899	ENSMUSG00000024201.12	Kdm4b	chr17	+	56394768	56394889	56394789	56394889	56393717	56394106	4899	102105	55,44	49,70	5,13	120	99	2.16562e-05	0.00125564	0.605,0.663	0.89,0.816	-0.219
838	ENSMUSG00000024045.6	Akap8	chr17	-	32312285	32313262	32312285	32312373	32314110	32314144	838	28,30	177193	220152	233216	198	99	0	0	0.073,0.072	0.321,0.26	-0.218
4000	ENSMUSG00000060373.15	Hnrnpc	chr14	-	52075254	52075436	52075254	52075415	52075612	52075726	4000	12081079	13601110	28612856	12931242	120	99	1.11022e-16	5.74515e-14	0.423,0.445	0.646,0.655	-0.217
35403	ENSMUSG00000031960.14	Aars	chr8	+	111034131	111034263	111034206	111034263	111033878	111033908	35403	71,61	15,11	83,77	4,0	174	99	1.5737e-06	0.00013239	0.729,0.759	0.922,1.0	-0.217
40488	ENSMUSG00000032119.5	Hinfp	chr9	-	44298333	44298626	44298333	44298411	44298872	44299025	40488	6,0	77,52	44,30	63,57	198	99	4.45199e-14	1.80116e-11	0.037,0.0	0.259,0.208	-0.215
1522	ENSMUSG00000005682.9	Pan2	chr10	+	128318162	128319038	128318944	128319038	128317889	128318033	1522	94,46	10,13	118,80	0,5	198	99	4.40927e-05	0.00225029	0.825,0.639	1.0,0.889	-0.213
43829	ENSMUSG00000033379.13	Atp6v0b	chr4	-	117886589	117887029	117886589	117886694	117887169	117887333	43829	50,47	73,73	137129	78,77	198	99	5.64105e-07	5.50535e-05	0.255,0.244	0.468,0.456	-0.213
46957	ENSMUSG00000055835.10	Zfp1	chr8	+	111666044	111666204	111666077	111666204	111658385	111658441	46957	2,1	29,19	27,10	34,46	132	99	0.000101021	0.0044794	0.049,0.038	0.373,0.14	-0.213
41288	ENSMUSG00000030207.15	Fam234b	chr6	+	135211804	135211933	135211834	135211933	135209032	135209431	41288	0,0	10,9	3,2	6,9	129	99	0.00166588	0.0397751	0.0,0.0	0.277,0.146	-0.212
11233	ENSMUSG00000013236.17	Ptprs	chr17	-	56437785	56437933	56437785	56437878	56447359	56447470	11233	27,37	2,11	13,17	0,0	154	99	4.47462e-05	0.00228103	0.897,0.684	1.0,1.0	-0.21
13311	ENSMUSG00000084883.2	Ccdc85c	chr12	-	108211514	108211622	108211514	108211619	108221708	108221782	13311	127113	90,68	61,52	10,16	102	99	3.59668e-05	0.001892	0.578,0.617	0.856,0.759	-0.21
31042	ENSMUSG00000008855.17	Hdac5	chr11	-	102218671	102218978	102218671	102218781	102224733	102224955	31042	74,84	15,6	65,46	0,0	198	99	3.93703e-07	3.98204e-05	0.712,0.875	1.0,1.0	-0.207
44121	ENSMUSG00000033313.11	Fbxl8	chr8	+	105266694	105267165	105266969	105267165	105264681	105264760	44121	40,57	12,4	42,43	2,0	198	99	0.000402164	0.0133663	0.625,0.877	0.913,1.0	-0.206
4347	ENSMUSG00000006019.15	Dhx34	chr7	-	16217987	16219184	16217987	16218950	16221997	16222037	4347	4,10	68,38	19,11	21,17	198	99	2.35464e-06	0.00019122	0.029,0.116	0.311,0.244	-0.205
5934	ENSMUSG00000021481.11	Zfp346	chr13	+	55122281	55122515	55122329	55122515	55115479	55115624	5934	60,47	57,58	96,74	33,47	147	99	0.00133537	0.0337276	0.415,0.353	0.662,0.515	-0.205
11783	ENSMUSG00000004561.14	Mettl17	chr14	+	51888955	51889217	51889146	51889217	51888741	51888836	11783	3,2	27,19	61,50	65104	198	99	3.42199e-06	0.000260769	0.053,0.05	0.319,0.194	-0.205
31043	ENSMUSG00000008855.17	Hdac5	chr11	-	102218671	102218982	102218671	102218781	102224733	102224955	31043	76,85	15,6	65,46	0,0	198	99	4.33581e-07	4.35568e-05	0.717,0.876	1.0,1.0	-0.204
10671	ENSMUSG00000116024.1	Gm49527	chr15	+	76888230	76888347	76888233	76888347	76881111	76881238	10671	56,38	21,18	157123	11,19	102	99	2.98094e-06	0.000231116	0.721,0.672	0.933,0.863	-0.202
27546	ENSMUSG00000044037.15	Als2cl	chr9	+	110894322	110894685	110894565	110894685	110893986	110894160	27546	5,3	17,15	32,41	49,34	198	99	0.00097448	0.0263631	0.128,0.091	0.246,0.376	-0.202
25610	ENSMUSG00000045411.16	2410002F23Rik	chr7	+	44248234	44248295	44248251	44248295	44246817	44246823	25610	1,1	12,13	28,26	65,63	116	99	0.000370109	0.012535	0.066,0.062	0.269,0.26	-0.201
5945	ENSMUSG00000055835.10	Zfp1	chr8	+	111666060	111666204	111666077	111666204	111658385	111658441	5945	4,1	29,19	23,12	34,46	116	99	0.00127225	0.0323907	0.105,0.043	0.366,0.182	-0.2
25760	ENSMUSG00000038705.13	Gmeb2	chr2	-	181264969	181265111	181264969	181265103	181265814	181265912	25760	14,16	7,2	12,14	0,1	107	99	0.000591464	0.0180164	0.649,0.881	1.0,0.928	-0.199
3494	ENSMUSG00000009995.17	Taz	chrX	+	74288447	74288513	74288450	74288513	74288177	74288219	3494	0,0	13,5	23,23	77110	102	99	2.79557e-05	0.00153974	0.0,0.0	0.225,0.169	-0.197
21261	ENSMUSG00000027706.8	Sec62	chr3	+	30819560	30820032	30819575	30820032	30818850	30818936	21261	30,25	75,74	27,27	30,30	114	99	0.000682208	0.0200927	0.258,0.227	0.439,0.439	-0.197
1785	ENSMUSG00000029068.16	Ccnl2	chr4	+	155818538	155820428	155820328	155820428	155817922	155817987	1785	225171	75,72	943691	123121	198	99	7.10548e-09	1.12934e-06	0.6,0.543	0.793,0.741	-0.196
1832	ENSMUSG00000040044.11	Orc3	chr4	-	34577952	34578032	34577952	34578029	34579742	34579876	1832	82,77	143115	279195	163175	102	99	9.74455e-06	0.000637738	0.358,0.394	0.624,0.52	-0.196
1708	ENSMUSG00000029207.16	Apbb2	chr5	-	66399621	66400284	66399621	66400281	66451467	66452283	1708	22,29	80,87	49,44	76,51	102	99	0.000127597	0.00537083	0.211,0.244	0.385,0.456	-0.193
38499	ENSMUSG00000029714.11	Gigyf1	chr5	+	137518687	137518986	137518877	137518986	137518547	137518612	38499	7,5	28,37	12,28	29,22	198	99	0.000814257	0.0229593	0.111,0.063	0.171,0.389	-0.193
653	ENSMUSG00000072501.5	Phf20l1	chr15	+	66604776	66604905	66604779	66604905	66604026	66604240	653	20,22	91105	133141	230233	102	99	3.2335e-07	3.37795e-05	0.176,0.169	0.359,0.37	-0.192
21991	ENSMUSG00000078485.3	Plekhn1	chr4	-	156230900	156231004	156230900	156230974	156231084	156231173	21991	3,3	53,59	21,18	52,47	129	99	1.45907e-07	1.70428e-05	0.042,0.038	0.237,0.227	-0.192
5942	ENSMUSG00000033703.9	Fuk	chr8	-	110889675	110889838	110889675	110889740	110890175	110890346	5942	6,4	36,24	32,8	24,26	197	99	0.00191359	0.0439425	0.077,0.077	0.401,0.134	-0.191
4935	ENSMUSG00000024137.9	E4f1	chr17	-	24445445	24445554	24445445	24445551	24445945	24446155	4935	116,89	113,71	59,59	26,20	102	99	0.000130915	0.00548599	0.499,0.549	0.688,0.741	-0.19
22520	ENSMUSG00000014599.10	Csf1	chr3	-	107756616	107757069	107756616	107756739	107760024	107760469	22520	7,3	140133	41,34	84,61	198	99	0	0	0.024,0.011	0.196,0.218	-0.19
49161	ENSMUSG00000073664.11	Nbeal1	chr1	+	60236370	60236503	60236381	60236503	60235463	60235561	49161	23,17	3,6	28,37	0,1	110	99	8.53432e-05	0.00392321	0.873,0.718	1.0,0.971	-0.19
2133	ENSMUSG00000037487.7	Ubr5	chr15	-	38037815	38038027	38037815	38038009	38040752	38040902	2133	190196	289287	95,84	72,53	117	99	4.45906e-06	0.000325314	0.357,0.366	0.528,0.573	-0.189
4379	ENSMUSG00000005687.14	Bcas2	chr3	+	103175618	103177419	103177338	103177419	103174339	103174501	4379	661558	124124	18751906	119,95	198	99	0	0	0.727,0.692	0.887,0.909	-0.189
5646	ENSMUSG00000041769.13	Ppp2r2d	chr7	+	138872873	138873051	138873000	138873051	138868409	138868507	5646	199153	13,27	300283	0,0	198	99	7.99361e-15	3.42057e-12	0.884,0.739	1.0,1.0	-0.189
22638	ENSMUSG00000068744.12	Psrc1	chr3	+	108384113	108384285	108384235	108384285	108383858	108383895	22638	14,14	306342	172135	288291	198	99	0	0	0.022,0.02	0.23,0.188	-0.188
2763	ENSMUSG00000034729.16	Mrps10	chr17	+	47372572	47372645	47372575	47372645	47372426	47372491	2763	79,59	171149	385349	391379	102	99	1.02768e-07	1.24959e-05	0.31,0.278	0.489,0.472	-0.186
5832	ENSMUSG00000031833.10	Mast3	chr8	-	70789847	70789920	70789847	70789917	70789996	70790085	5832	77,47	34,24	44,32	6,6	102	99	0.000683199	0.0200954	0.687,0.655	0.877,0.838	-0.186
1831	ENSMUSG00000028975.16	Pex14	chr4	-	148967523	148970635	148967523	148967626	148984036	148984165	1831	204187	21,23	252294	0,0	198	99	1.11022e-16	5.74515e-14	0.829,0.803	1.0,1.0	-0.184
35404	ENSMUSG00000031960.14	Aars	chr8	+	111034171	111034263	111034206	111034263	111033878	111033908	35404	66,60	15,11	78,70	4,0	134	99	2.15123e-06	0.000175986	0.765,0.801	0.935,1.0	-0.184
9968	ENSMUSG00000022710.17	Usp7	chr16	-	8698688	8698809	8698688	8698806	8712132	8712192	9968	19,12	3,6	13,8	0,1	102	99	0.00106193	0.0281472	0.86,0.66	1.0,0.886	-0.183
33704	ENSMUSG00000070003.7	Ssbp4	chr8	-	70600008	70600187	70600008	70600062	70600395	70600485	33704	2,0	18,16	5,4	6,14	198	99	0.00120727	0.0310332	0.053,0.0	0.294,0.125	-0.183
528	ENSMUSG00000003527.9	Ess2	chr16	-	17907749	17907922	17907749	17907919	17909904	17910000	528	70,48	80,43	140195	75,81	102	99	2.74457e-05	0.00151729	0.459,0.52	0.644,0.7	-0.182
29104	ENSMUSG00000016833.14	Mrps18c	chr5	+	100801867	100801991	100801911	100801991	100798746	100798860	29104	15,17	2,3	116,87	0,0	143	99	0.000642524	0.019165	0.839,0.797	1.0,1.0	-0.182
623	ENSMUSG00000033565.18	Rbfox2	chr15	-	77097939	77098084	77097939	77098072	77099239	77099332	623	101,83	252230	155216	188247	111	99	6.65408e-08	8.43665e-06	0.263,0.243	0.424,0.438	-0.178
4429	ENSMUSG00000030780.15	BC017158	chr7	-	128274632	128274723	128274632	128274703	128276085	128276143	4429	0,2	9,23	15,11	35,48	119	99	0.0007228	0.0209692	0.0,0.067	0.263,0.16	-0.178
9690	ENSMUSG00000022843.17	Clcn2	chr16	-	20707572	20707732	20707572	20707632	20707842	20707916	9690	1,1	28,25	54,25	70,96	198	99	1.53592e-07	1.7752e-05	0.018,0.02	0.278,0.115	-0.178
41936	ENSMUSG00000050891.10	Tatdn1	chr15	-	58916167	58916362	58916167	58916192	58921139	58921182	41936	119,87	26,22	229251	16,24	198	99	3.71312e-05	0.00194177	0.696,0.664	0.877,0.839	-0.178
4901	ENSMUSG00000034269.12	Setd5	chr6	+	113110316	113110525	113110373	113110525	113104934	113105121	4901	325269	49,36	115,88	1,0	156	99	2.12924e-11	6.07421e-09	0.808,0.826	0.986,1.0	-0.176
1984	ENSMUSG00000020453.17	Patz1	chr11	+	3306222	3306360	3306287	3306360	3299033	3299205	1984	2,9	23,32	29,34	46,56	164	99	0.00072772	0.021057	0.05,0.145	0.276,0.268	-0.175
28555	ENSMUSG00000039630.10	Hnrnpu	chr1	-	178323619	178324064	178323619	178323713	178325242	178325313	28555	52,42	14,11	485333	53,33	198	99	0.0017348	0.0408919	0.65,0.656	0.821,0.835	-0.175
29154	ENSMUSG00000041935.10	AW549877	chr15	-	3991717	3992067	3991717	3991864	3992357	3992464	29154	22,15	94,92	96,71	102134	198	99	8.93529e-08	1.11386e-05	0.105,0.075	0.32,0.209	-0.175
17389	ENSMUSG00000015889.8	Lta4h	chr10	+	93474477	93474579	93474487	93474579	93472898	93473043	17389	20,17	3,4	10,15	0,0	109	99	0.000526275	0.0165518	0.858,0.794	1.0,1.0	-0.174
28556	ENSMUSG00000039630.10	Hnrnpu	chr1	-	178323619	178324110	178323619	178323713	178325242	178325313	28556	52,42	14,11	485332	53,33	198	99	0.00176006	0.0413341	0.65,0.656	0.821,0.834	-0.174
31041	ENSMUSG00000008855.17	Hdac5	chr11	-	102218671	102218953	102218671	102218781	102224733	102224955	31041	92106	15,6	65,46	0,0	198	99	1.6312e-06	0.000136711	0.754,0.898	1.0,1.0	-0.174
720	ENSMUSG00000022098.10	Bmp1	chr14	-	70507998	70508214	70507998	70508177	70508455	70508573	720	108,87	547522	198150	322293	136	99	1.88738e-15	8.84148e-13	0.126,0.108	0.309,0.271	-0.173
23450	ENSMUSG00000028059.15	Arhgef2	chr3	+	88629443	88629878	88629786	88629878	88616560	88616654	23450	2,2	213175	13,17	46,28	198	99	3.33067e-16	1.66545e-13	0.005,0.006	0.124,0.233	-0.173
76	ENSMUSG00000031010.17	Usp9x	chrX	+	13116608	13116757	13116623	13116757	13114507	13114644	76	181111	162159	154184	83108	114	99	0.000283536	0.0101564	0.492,0.377	0.617,0.597	-0.172
21242	ENSMUSG00000028347.14	Tmeff1	chr4	+	48650294	48650418	48650300	48650418	48638979	48639045	21242	313243	231167	651624	201218	105	99	4.40299e-09	7.3942e-07	0.561,0.578	0.753,0.73	-0.172
29214	ENSMUSG00000040648.14	Ppip5k2	chr1	-	97716541	97716640	97716541	97716604	97717441	97717561	29214	1,0	12,10	3,6	21,10	135	99	0.00115818	0.0303012	0.058,0.0	0.095,0.306	-0.172
3869	ENSMUSG00000026781.17	Acbd5	chr2	+	23099561	23099764	23099564	23099764	23094288	23094517	3869	59,50	81,66	91134	65,86	102	99	0.000265845	0.00965786	0.414,0.424	0.576,0.602	-0.17
18422	ENSMUSG00000029253.12	Cenpc1	chr5	-	86062003	86062063	86062003	86062035	86065327	86065583	18422	12,14	1,4	48,50	0,1	127	99	0.00202756	0.0460605	0.903,0.732	1.0,0.975	-0.17
21738	ENSMUSG00000038127.14	Ccdc50	chr16	+	27436343	27436602	27436497	27436602	27435561	27435677	21738	63,44	67,37	75,78	40,32	198	99	0.00105332	0.0280022	0.32,0.373	0.484,0.549	-0.17
33700	ENSMUSG00000070003.7	Ssbp4	chr8	-	70599687	70599949	70599687	70599757	70600395	70600485	33700	22,20	92,80	127,70	121128	198	99	2.48799e-06	0.000200222	0.107,0.111	0.344,0.215	-0.17
18269	ENSMUSG00000029484.12	Anxa3	chr5	+	96838541	96838706	96838574	96838706	96838292	96838415	18269	0,1	9,9	4,5	9,19	132	99	0.00119464	0.0308283	0.0,0.077	0.25,0.165	-0.169
43455	ENSMUSG00000001909.16	Trmt1	chr8	+	84690703	84690933	84690810	84690933	84690516	84690572	43455	51,33	456428	118,96	183218	198	99	0	0	0.053,0.037	0.244,0.18	-0.167
3317	ENSMUSG00000029512.11	Ulk1	chr5	-	110790849	110790954	110790849	110790936	110791051	110791197	3317	4,4	25,41	24,20	78,36	117	99	0.00143092	0.0355754	0.119,0.076	0.207,0.32	-0.166
28778	ENSMUSG00000116048.1	2022-09-02	chr1	+	93488971	93489154	93489127	93489154	93478992	93479068	28778	50,26	65,84	115107	78113	198	99	0.000969344	0.0262561	0.278,0.134	0.424,0.321	-0.166
21074	ENSMUSG00000025967.16	Eef1b2	chr1	+	63178022	63178565	63178422	63178565	63177486	63177876	21074	66,53	15,5	287236	16,5	198	99	0.000351673	0.0120369	0.687,0.841	0.9,0.959	-0.165
42138	ENSMUSG00000023977.15	Ubr2	chr17	-	46980319	46980757	46980319	46980418	46981353	46981442	42138	18,16	82,71	59,34	69,57	198	99	1.0817e-06	9.6859e-05	0.099,0.101	0.299,0.23	-0.165
40593	ENSMUSG00000039001.12	Rps21	chr2	+	180257569	180257665	180257592	180257665	180257417	180257447	40593	32,20	2,7	78,57	3,0	122	99	0.00116716	0.0304645	0.928,0.699	0.955,1.0	-0.164
4784	ENSMUSG00000039205.16	Ciz1	chr2	+	32370031	32370125	32370046	32370125	32367302	32367532	4784	130,86	42,32	72,82	7,12	114	99	0.000139002	0.00575829	0.729,0.7	0.899,0.856	-0.163
15951	ENSMUSG00000002812.4	Flii	chr11	-	60720185	60720497	60720185	60720494	60720637	60720785	15951	132129	89,76	73,67	26,16	102	99	0.000604136	0.0182821	0.59,0.622	0.732,0.803	-0.162
49531	ENSMUSG00000033629.6	Hacd3	chr9	-	65000061	65000197	65000061	65000177	65000980	65001091	49531	0,0	1,3	7,5	28,23	119	99	0.000742099	0.0213344	0.0,0.0	0.172,0.153	-0.162
1327	ENSMUSG00000040667.11	Nup88	chr11	-	70944844	70944985	70944844	70944970	70945202	70945361	1327	43,56	237210	142161	275280	114	99	2.41445e-08	3.37894e-06	0.136,0.188	0.31,0.333	-0.16
1588	ENSMUSG00000020167.14	Tcf3	chr10	-	80415364	80415523	80415364	80415520	80415852	80415926	1588	110119	206193	210182	160195	102	99	4.68061e-05	0.00236437	0.341,0.374	0.56,0.475	-0.16
2923	ENSMUSG00000019487.11	Trip10	chr17	+	57262353	57262472	57262356	57262472	57261639	57261788	2923	138142	303306	155171	178180	102	99	2.306e-06	0.000187612	0.307,0.311	0.458,0.48	-0.16
3936	ENSMUSG00000039623.13	Ap5z1	chr5	+	142470382	142470556	142470393	142470556	142470289	142470327	3936	1,0	12,3	11,6	31,31	110	99	0.00117655	0.0305841	0.07,0.0	0.242,0.148	-0.16
5645	ENSMUSG00000041769.13	Ppp2r2d	chr7	+	138872873	138873051	138873000	138873051	138846619	138846704	5645	203149	15,20	309292	1,2	198	99	1.82077e-12	5.87171e-10	0.871,0.788	0.994,0.986	-0.16
6316	ENSMUSG00000037370.13	Enpp1	chr10	-	24651244	24651399	24651244	24651396	24652834	24652886	6316	0,1	78,51	3,4	12,23	102	99	0.000136089	0.00564959	0.0,0.019	0.195,0.144	-0.16
42079	ENSMUSG00000030403.9	Vasp	chr7	-	19260660	19260681	19260660	19260678	19260823	19261076	42079	186184	55,58	516495	41,45	102	99	3.80984e-12	1.20248e-09	0.766,0.755	0.924,0.914	-0.159
4989	ENSMUSG00000056673.14	Kdm5d	chrY	+	927602	927891	927709	927891	927244	927439	4989	11,5	61,31	61,65	97105	198	99	2.93635e-06	0.000228855	0.083,0.075	0.239,0.236	-0.158
23348	ENSMUSG00000040481.17	Bptf	chr11	-	107086711	107086897	107086711	107086894	107095001	107095190	23348	25,15	8,7	6,3	0,1	102	99	0.00220503	0.0491144	0.752,0.675	1.0,0.744	-0.158
26398	ENSMUSG00000101438.2	Gm19412	chr17	-	33919278	33919764	33919278	33919626	33920069	33920485	26398	0,0	4,7	8,4	13,23	198	99	0.000346717	0.0119242	0.0,0.0	0.235,0.08	-0.158
30232	ENSMUSG00000024163.17	Mapk8ip3	chr17	-	24909149	24909612	24909149	24909161	24912747	24912866	30232	11,10	131113	34,16	57,40	198	99	6.2811e-10	1.30013e-07	0.04,0.042	0.23,0.167	-0.158
2249	ENSMUSG00000022587.14	Ly6e	chr15	+	74957776	74957877	74957779	74957877	74955482	74955717	2249	939879	828724	18012097	778923	102	99	1.00775e-09	1.96305e-07	0.524,0.541	0.692,0.688	-0.157
6675	ENSMUSG00000008682.13	Rpl10	chrX	+	74271775	74271907	74271807	74271907	74271659	74271718	6675	25,33	4,4	16,25	0,0	131	99	0.000308016	0.0108361	0.825,0.862	1.0,1.0	-0.157
15839	ENSMUSG00000020898.18	Ctc1	chr11	+	69033765	69034036	69033958	69034036	69033366	69033541	15839	0,4	93103	28,30	70,76	198	99	2.22045e-15	9.88165e-13	0.0,0.019	0.167,0.165	-0.157
20553	ENSMUSG00000040808.4	S100g	chrX	-	162961991	162962243	162961991	162962240	162964061	162964205	20553	19,17	109,83	878493	18001102	102	99	2.12499e-06	0.000174159	0.145,0.166	0.321,0.303	-0.157
15838	ENSMUSG00000020898.18	Ctc1	chr11	+	69033669	69034036	69033958	69034036	69033366	69033541	15838	0,4	93103	29,29	70,76	198	99	2.22045e-15	9.88165e-13	0.0,0.019	0.172,0.16	-0.156
34656	ENSMUSG00000002833.11	Hdgfl2	chr17	+	56096513	56097004	56096847	56097004	56096204	56096276	34656	18,14	116100	61,41	72115	198	99	1.78059e-06	0.000148671	0.072,0.065	0.298,0.151	-0.156
5258	ENSMUSG00000023262.13	Acy1	chr9	-	106437628	106437737	106437628	106437733	106438132	106438319	5258	67,55	72,64	95125	53,80	103	99	0.00136476	0.0342754	0.472,0.452	0.633,0.6	-0.155
23341	ENSMUSG00000032998.16	Foxj3	chr4	+	119623220	119623412	119623309	119623412	119621600	119621702	23341	157126	20,11	71,68	0,1	188	99	6.94294e-07	6.54622e-05	0.805,0.858	1.0,0.973	-0.155
954	ENSMUSG00000039738.16	Slx4	chr16	-	3984990	3987181	3984990	3987176	3987914	3988081	954	0,0	5,3	2,5	20,17	104	99	0.000906434	0.0250218	0.0,0.0	0.087,0.219	-0.153
5068	ENSMUSG00000007783.10	Cpt1c	chr7	-	44960757	44961009	44960757	44960910	44961518	44961650	5068	1,1	31,24	61,46	134123	198	99	3.21255e-08	4.37212e-06	0.016,0.02	0.185,0.158	-0.153
31921	ENSMUSG00000063052.9	Lrrc40	chr3	+	158043538	158043690	158043560	158043690	158040440	158040622	31921	0,1	90,86	17,3	38,49	121	99	1.37276e-07	1.61619e-05	0.0,0.009	0.268,0.048	-0.153
1632	ENSMUSG00000029592.11	Usp30	chr5	+	114111868	114111914	114111871	114111914	114111116	114111215	1632	199133	150127	73100	37,39	102	99	0.000461306	0.0149362	0.563,0.504	0.657,0.713	-0.152
2428	ENSMUSG00000068917.12	Clk2	chr3	+	89168694	89168923	89168697	89168923	89167034	89167204	2428	75,61	26,24	173185	38,12	102	99	0.000256736	0.00940374	0.737,0.712	0.815,0.937	-0.152
6028	ENSMUSG00000036833.16	Pnpla7	chr2	+	24987113	24987199	24987118	24987199	24983489	24983649	6028	0,0	15,12	2,6	15,24	104	99	0.000178746	0.00707717	0.0,0.0	0.113,0.192	-0.152
36503	ENSMUSG00000022433.19	Csnk1e	chr15	-	79424151	79424361	79424151	79424255	79424839	79424988	36503	43,42	109,93	93,67	73,94	198	99	0.000343422	0.0118201	0.165,0.184	0.389,0.263	-0.152
16376	ENSMUSG00000020272.8	Stk10	chr11	+	32588535	32588950	32588755	32588950	32587312	32587385	16376	6,5	57,67	15,8	28,19	198	99	1.87485e-05	0.00111845	0.05,0.036	0.211,0.174	-0.15
22074	ENSMUSG00000030231.11	Plekha5	chr6	+	140536607	140536763	140536647	140536763	140535174	140535360	22074	0,0	5,1	4,8	19,28	139	99	0.000612606	0.0184707	0.0,0.0	0.13,0.169	-0.15
49056	ENSMUSG00000025650.13	Col7a1	chr9	+	108964837	108965076	108965049	108965076	108964586	108964664	49056	1,3	80,59	12,8	37,17	198	99	6.86804e-08	8.68319e-06	0.006,0.025	0.14,0.19	-0.15
827	ENSMUSG00000021816.11	Ppp3cb	chr14	-	20509415	20509500	20509415	20509497	20515522	20515600	827	129101	211166	242255	228216	102	99	2.8255e-05	0.00155047	0.372,0.371	0.507,0.534	-0.149
4263	ENSMUSG00000033124.15	Atg9a	chr1	-	75186189	75187186	75186189	75186938	75187684	75187826	4263	12,7	118142	34,10	44,50	198	99	8.65643e-07	7.91041e-05	0.048,0.024	0.279,0.091	-0.149
47874	ENSMUSG00000042496.18	Prdm10	chr9	+	31316169	31316334	31316241	31316334	31313552	31313621	47874	72,50	6,6	16,20	0,0	171	99	0.000217015	0.00833289	0.874,0.828	1.0,1.0	-0.149
4466	ENSMUSG00000031691.14	Tnpo2	chr8	+	85038334	85038489	85038377	85038489	85036914	85036977	4466	449390	214184	183160	35,48	142	99	0.000135556	0.00564203	0.594,0.596	0.785,0.699	-0.147
40631	ENSMUSG00000031169.13	Porcn	chrX	-	8197974	8198359	8197974	8198085	8199066	8199152	40631	5,1	87,71	10,8	20,27	198	99	6.32603e-07	6.05435e-05	0.028,0.007	0.2,0.129	-0.147
40759	ENSMUSG00000034908.16	Sidt2	chr9	-	45947628	45947758	45947628	45947697	45947835	45947909	40759	2,0	21,11	11,3	18,23	160	99	0.00217568	0.0486067	0.056,0.0	0.274,0.075	-0.147
46683	ENSMUSG00000027330.16	Cdc25b	chr2	+	131192777	131193148	131193067	131193148	131192556	131192688	46683	7,7	205153	47,28	88100	198	99	4.44089e-16	2.17179e-13	0.017,0.022	0.211,0.123	-0.147
35006	ENSMUSG00000027134.4	Lpcat4	chr2	+	112242978	112243062	112243003	112243062	112242719	112242761	35006	1,0	107,99	38,21	119160	124	99	1.78124e-12	5.78618e-10	0.007,0.0	0.203,0.095	-0.146
12635	ENSMUSG00000022858.16	Tra2b	chr16	-	22246898	22247263	22246898	22247260	22249049	22249133	12635	30,14	2,4	60,71	0,0	102	99	0.00127867	0.0324985	0.936,0.773	1.0,1.0	-0.145
6062	ENSMUSG00000032120.11	C2cd2l	chr9	-	44313877	44314014	44313877	44314011	44314154	44314256	6062	3,4	64,61	7,9	28,36	102	99	0.000927508	0.0253699	0.044,0.06	0.195,0.195	-0.143
44157	ENSMUSG00000032193.9	Ldlr	chr9	+	21731746	21731869	21731749	21731869	21723640	21723844	44157	53,48	7,15	126128	3,7	102	99	2.56481e-05	0.00144246	0.88,0.756	0.976,0.947	-0.143
3129	ENSMUSG00000027751.13	Supt20	chr3	+	54701486	54701616	54701489	54701616	54698592	54698659	3129	78,48	120,85	96103	96,88	102	99	0.00165236	0.0395136	0.387,0.354	0.493,0.532	-0.142
5983	ENSMUSG00000024963.12	Dnajc4	chr19	-	6989422	6989587	6989422	6989584	6989680	6989865	5983	97,75	29,30	75,61	13,6	102	99	0.00123165	0.0315738	0.765,0.708	0.848,0.908	-0.142
11908	ENSMUSG00000023908.8	Pkmyt1	chr17	+	23734682	23735123	23734965	23735123	23732336	23734316	11908	3,1	41,47	40,16	70,67	198	99	1.10677e-07	1.3312e-05	0.035,0.011	0.222,0.107	-0.142
41645	ENSMUSG00000007783.10	Cpt1c	chr7	-	44960757	44961038	44960757	44960910	44961518	44961650	41645	0,1	31,24	55,38	134123	198	99	1.93739e-08	2.75405e-06	0.0,0.02	0.17,0.134	-0.142
44868	ENSMUSG00000070371.11	Prss36	chr7	-	127933370	127933611	127933370	127933492	127934389	127934627	44868	0,3	17,12	9,20	28,29	198	99	0.000763993	0.0218089	0.0,0.111	0.138,0.256	-0.142
4818	ENSMUSG00000034522.10	Zfp395	chr14	+	65385395	65385660	65385398	65385660	65358388	65358418	4818	27,19	1,6	5,3	0,0	102	99	0.00154877	0.0377879	0.963,0.755	1.0,1.0	-0.141
22496	ENSMUSG00000004267.16	Eno2	chr6	-	124763004	124763303	124763004	124763206	124763726	124763924	22496	8,8	85,85	10,18	35,28	196	99	2.70043e-05	0.00149856	0.045,0.045	0.126,0.245	-0.141
3172	ENSMUSG00000025280.8	Polr3a	chr14	-	24469264	24469443	24469264	24469429	24470533	24470672	3172	2,0	79,69	10,26	83,87	113	99	1.46307e-08	2.16316e-06	0.022,0.0	0.095,0.207	-0.14
30035	ENSMUSG00000026782.15	Abi2	chr1	+	60448077	60448202	60448080	60448202	60447259	60447406	30035	248216	96,68	152170	20,25	102	99	3.01794e-06	0.000233173	0.715,0.755	0.881,0.868	-0.14
45330	ENSMUSG00000039176.17	Polg	chr7	-	79454810	79455094	79454810	79454864	79455434	79455595	45330	7,5	91,68	56,33	95115	198	99	1.24343e-08	1.85693e-06	0.037,0.035	0.228,0.125	-0.14
17806	ENSMUSG00000003068.16	Stk11	chr10	+	80126074	80126369	80126232	80126369	80116617	80116907	17806	62,61	4,6	60,37	0,0	198	99	7.06176e-05	0.00335042	0.886,0.836	1.0,1.0	-0.139
19053	ENSMUSG00000045934.15	Mtmr11	chr3	+	96171121	96171470	96171142	96171470	96170585	96170646	19053	0,1	10,7	10,7	33,26	120	99	0.000819842	0.0230774	0.0,0.105	0.2,0.182	-0.139
21628	ENSMUSG00000058006.12	Mdn1	chr4	+	32752030	32752192	32752091	32752192	32751226	32751393	21628	38,18	9,0	58,66	0,0	160	99	5.30741e-05	0.00264201	0.723,1.0	1.0,1.0	-0.139
33974	ENSMUSG00000029141.16	Slc4a1ap	chr5	+	31548610	31548681	31548613	31548681	31543636	31543913	33974	75,47	23,16	108136	9,22	102	99	0.00100077	0.0268782	0.76,0.74	0.921,0.857	-0.139
45402	ENSMUSG00000011832.15	Evi5l	chr8	+	4183487	4183670	4183491	4183670	4166738	4166763	45402	78,64	11,19	30,22	0,2	103	99	0.000231206	0.00874947	0.872,0.764	1.0,0.914	-0.139
3393	ENSMUSG00000026082.11	Rev1	chr1	-	38074314	38075023	38074314	38074443	38079289	38079398	3393	26,14	47,35	114107	122103	198	99	0.00164678	0.0394438	0.217,0.167	0.318,0.342	-0.138
22710	ENSMUSG00000046434.16	Hnrnpa1	chr15	+	103246320	103246421	103246345	103246421	103243958	103244028	22710	53,39	17781456	89,74	327365	124	99	0	0	0.023,0.021	0.179,0.139	-0.137
566	ENSMUSG00000023007.15	Prpf40b	chr15	+	99315111	99315286	99315190	99315286	99314842	99314980	566	13,10	77,51	26,16	43,35	178	99	0.000303506	0.0107113	0.086,0.098	0.252,0.203	-0.136
1822	ENSMUSG00000004040.16	Stat3	chr11	-	100889477	100889590	100889477	100889540	100889885	100889928	1822	314238	41,47	259273	10,13	149	99	4.22408e-08	5.56166e-06	0.836,0.771	0.945,0.933	-0.136
2969	ENSMUSG00000043733.14	Ptpn11	chr5	-	121144529	121144696	121144529	121144684	121149102	121149234	2969	78,77	265198	129166	209240	111	99	1.50497e-05	0.000923805	0.208,0.258	0.355,0.382	-0.136
4175	ENSMUSG00000038671.15	Arfrp1	chr2	-	181364013	181364195	181364013	181364096	181364310	181364398	4175	11,25	188162	130105	271242	198	99	4.50751e-14	1.80718e-11	0.028,0.072	0.193,0.178	-0.136
5587	ENSMUSG00000032637.15	Atxn2l	chr7	-	126496436	126496646	126496436	126496628	126497253	126497364	5587	40,46	375303	35,27	87,83	117	99	1.46252e-06	0.000125166	0.083,0.114	0.254,0.216	-0.136
15833	ENSMUSG00000020898.18	Ctc1	chr11	+	69033366	69033541	69033390	69033541	69033182	69033271	15833	110111	22,19	118112	4,6	123	99	1.00866e-05	0.000651692	0.801,0.825	0.96,0.938	-0.136
913	ENSMUSG00000042524.14	Sun2	chr15	-	79735845	79735925	79735845	79735919	79737065	79737159	913	197143	148149	166194	78105	105	99	0.000880749	0.0244974	0.557,0.475	0.667,0.635	-0.135
4615	ENSMUSG00000036817.14	Sun1	chr5	+	139238827	139238939	139238830	139238939	139237878	139237922	4615	172153	86120	278341	82131	102	99	0.000814614	0.0229593	0.66,0.553	0.767,0.716	-0.135
5972	ENSMUSG00000001017.15	Chtop	chr3	-	90503095	90503282	90503095	90503279	90506107	90506261	5972	230219	199187	794861	449361	102	99	1.5858e-05	0.000962792	0.529,0.532	0.632,0.698	-0.135
8319	ENSMUSG00000079414.3	Gm11110	chr17	-	57102054	57102371	57102054	57102153	57103349	57103484	8319	2,0	15,13	8,6	17,18	198	99	0.00109195	0.028874	0.062,0.0	0.19,0.143	-0.135
43826	ENSMUSG00000033379.13	Atp6v0b	chr4	-	117885803	117886163	117885803	117885873	117886275	117886558	43826	111,68	11,4	119109	0,0	198	99	4.68354e-07	4.6629e-05	0.835,0.895	1.0,1.0	-0.135
17107	ENSMUSG00000060181.6	Slc35e3	chr10	-	117744624	117744995	117744624	117744844	117745784	117746365	17107	47,23	4,2	139163	1,1	198	99	0.00104546	0.0278928	0.855,0.852	0.986,0.988	-0.134
352	ENSMUSG00000024220.14	Zfp523	chr17	+	28197750	28197973	28197773	28197973	28195147	28195225	352	1,4	29,38	21,20	65,83	122	99	0.000626307	0.018782	0.027,0.079	0.208,0.164	-0.133
45148	ENSMUSG00000038611.17	Phrf1	chr7	+	141260845	141261114	141260959	141261114	141260396	141260707	45148	25,21	65,73	40,47	50,65	198	99	0.000526735	0.0165546	0.161,0.126	0.286,0.266	-0.133
5420	ENSMUSG00000001909.16	Trmt1	chr8	+	84690801	84690947	84690810	84690947	84690516	84690572	5420	38,32	456428	56,52	183218	108	99	1.19964e-10	2.9015e-08	0.071,0.064	0.219,0.179	-0.132
15836	ENSMUSG00000020898.18	Ctc1	chr11	+	69033664	69034036	69033958	69034036	69033366	69033541	15836	5,9	93103	29,29	70,76	198	99	6.3095e-09	1.01004e-06	0.026,0.042	0.172,0.16	-0.132
12972	ENSMUSG00000039233.12	Tbce	chr13	-	14009628	14009960	14009628	14009731	14010541	14010641	12972	6,10	102,63	95115	227244	198	99	1.0027e-09	1.96305e-07	0.029,0.074	0.173,0.191	-0.131
26888	ENSMUSG00000078429.9	Ctdsp2	chr10	+	126992598	126993034	126993007	126993034	126991530	126991676	26888	975852	106,72	283276	6,3	198	99	7.14577e-11	1.8382e-08	0.821,0.855	0.959,0.979	-0.131
32455	ENSMUSG00000053332.13	Gas5	chr1	+	161037258	161037547	161037504	161037547	161036819	161036852	32455	217176	31,22	963823	43,35	198	99	3.46878e-07	3.5734e-05	0.778,0.8	0.918,0.922	-0.131
5419	ENSMUSG00000001909.16	Trmt1	chr8	+	84690784	84690947	84690810	84690947	84690516	84690572	5419	29,23	456428	59,47	183218	125	99	4.64073e-14	1.81164e-11	0.048,0.041	0.203,0.146	-0.13
7663	ENSMUSG00000024843.15	Chka	chr19	+	3875366	3875788	3875734	3875788	3864647	3864759	7663	0,5	46,48	39,32	74143	198	99	8.74494e-07	7.97492e-05	0.0,0.05	0.209,0.101	-0.13
37432	ENSMUSG00000079487.11	Med12	chrX	+	101293792	101293870	101293795	101293870	101293424	101293630	37432	21,34	3,5	17,17	0,0	102	99	0.000655327	0.0194297	0.872,0.868	1.0,1.0	-0.13
17478	ENSMUSG00000020032.14	Nuak1	chr10	-	84392255	84392567	84392255	84392321	84393991	84394143	17478	2,0	31,20	6,7	20,19	198	99	0.000135426	0.00564203	0.031,0.0	0.13,0.156	-0.128
30089	ENSMUSG00000039988.14	Ankrd13c	chr3	+	157994596	157994758	157994651	157994758	157991722	157991812	30089	93,72	11,7	213259	1,4	154	99	2.78819e-07	2.9614e-05	0.845,0.869	0.993,0.977	-0.128
43057	ENSMUSG00000089989.10	Gm45713	chr7	-	45126708	45127120	45126708	45127087	45127208	45127274	43057	406316	226218	669462	238169	132	99	3.51847e-05	0.00186186	0.574,0.521	0.678,0.672	-0.128
1557	ENSMUSG00000035529.10	Prdm4	chr10	-	85904130	85904270	85904130	85904249	85905348	85905498	1557	18,11	83,85	45,55	106142	120	99	0.000329493	0.0114558	0.152,0.096	0.259,0.242	-0.127
3359	ENSMUSG00000028049.15	Scamp3	chr3	+	89180038	89180380	89180251	89180380	89179316	89179437	3359	13,3	217170	85,39	163210	198	99	7.90479e-14	2.95619e-11	0.029,0.009	0.207,0.085	-0.127
13575	ENSMUSG00000039218.17	Srrm2	chr17	+	23811816	23812077	23811827	23812077	23811671	23811731	13575	46,26	0,8	105,58	0,0	110	99	0.000381532	0.0128414	1.0,0.745	1.0,1.0	-0.127
42044	ENSMUSG00000044252.18	Osbpl1a	chr18	-	12905970	12906018	12905970	12906015	12906887	12906949	42044	1,1	93,46	6,4	23,43	102	99	0.000130868	0.00548599	0.01,0.021	0.202,0.083	-0.127
3609	ENSMUSG00000026203.16	Dnajb2	chr1	+	75239107	75239333	75239279	75239333	75237454	75237564	3609	8,8	94,83	26,16	41,74	198	99	3.16003e-05	0.00170462	0.041,0.046	0.241,0.098	-0.126
4207	ENSMUSG00000040296.15	Ddx58	chr4	-	40227965	40228200	40227965	40228113	40229494	40229676	4207	1,1	31,39	2,6	10,14	186	99	0.000420102	0.0138156	0.017,0.013	0.096,0.186	-0.126
5417	ENSMUSG00000001909.16	Trmt1	chr8	+	84690772	84690947	84690810	84690947	84690516	84690572	5417	64,53	456428	85,64	183218	137	99	4.25929e-09	7.17997e-07	0.092,0.082	0.251,0.175	-0.126
1391	ENSMUSG00000024234.7	Mtpap	chr18	+	4380653	4380887	4380672	4380887	4379568	4379741	1391	229221	68,66	184199	24,27	118	99	4.24782e-05	0.00218797	0.739,0.737	0.865,0.861	-0.125
39661	ENSMUSG00000044465.19	Fam160a2	chr7	-	105381398	105381859	105381398	105381577	105383780	105384572	39661	4,3	98,85	17,13	48,41	198	99	1.64405e-08	2.38323e-06	0.02,0.017	0.15,0.137	-0.125
41646	ENSMUSG00000007783.10	Cpt1c	chr7	-	44960757	44961168	44960757	44960910	44961518	44961650	41646	0,1	31,24	47,34	134123	198	99	1.15719e-07	1.38436e-05	0.0,0.02	0.149,0.121	-0.125
31351	ENSMUSG00000035495.15	Tstd2	chr4	-	46119840	46119999	46119840	46119913	46120447	46120566	31351	109102	14,13	325344	16,11	185	99	0.000210183	0.00810551	0.806,0.808	0.916,0.944	-0.123
4621	ENSMUSG00000036639.12	Nudt1	chr5	+	140332394	140332473	140332422	140332473	140331908	140331955	4621	3,1	27,18	39,34	124130	127	99	0.00213579	0.0479691	0.08,0.042	0.197,0.169	-0.122
5323	ENSMUSG00000038695.13	Josd2	chr7	+	44470858	44471307	44471112	44471307	44470411	44470537	5323	34,18	188155	141142	302297	198	99	3.57591e-10	7.72518e-08	0.083,0.055	0.189,0.193	-0.122
35177	ENSMUSG00000040952.16	Rps19	chr7	+	24888234	24888465	24888281	24888465	24886106	24886187	35177	311272	562534	503397	500462	146	99	3.71323e-06	0.00028056	0.273,0.257	0.406,0.368	-0.122
39032	ENSMUSG00000015112.15	Slc25a13	chr6	-	6109936	6110024	6109936	6110021	6113937	6114022	39032	15,9	148105	57,45	172218	102	99	2.75226e-05	0.00151965	0.09,0.077	0.243,0.167	-0.122
14557	ENSMUSG00000020752.11	Recql5	chr11	-	115927328	115927582	115927328	115927434	115927967	115928486	14557	1,0	15,12	21,14	55,55	198	99	6.18702e-05	0.0030059	0.032,0.0	0.16,0.113	-0.121
21691	ENSMUSG00000040842.17	Szrd1	chr4	-	141118526	141118801	141118526	141118778	141139691	141139775	21691	66,71	234203	96,73	137147	122	99	0.000284786	0.0101716	0.186,0.221	0.362,0.287	-0.121
31095	ENSMUSG00000026209.15	Dnpep	chr1	-	75316709	75316997	75316709	75316803	75317334	75317659	31095	43,58	110102	338292	347344	198	99	5.91812e-05	0.00289422	0.163,0.221	0.328,0.298	-0.121
32401	ENSMUSG00000053332.13	Gas5	chr1	+	161035995	161036244	161036207	161036244	161035751	161035804	32401	356298	38,38	13771124	43,47	198	99	1.93404e-09	3.48464e-07	0.824,0.797	0.941,0.923	-0.121
32797	ENSMUSG00000039850.16	Endov	chr11	+	119502274	119502361	119502292	119502361	119500590	119500703	32797	0,0	13,17	12,8	53,76	117	99	0.000130292	0.00547016	0.0,0.0	0.161,0.082	-0.121
43723	ENSMUSG00000032363.15	Adamts7	chr9	+	90195422	90195850	90195676	90195850	90195157	90195310	43723	1,0	18,17	5,6	15,21	198	99	0.000295755	0.0104841	0.027,0.0	0.143,0.125	-0.121
13163	ENSMUSG00000011158.8	Brf1	chr12	-	112965728	112966018	112965728	112965992	112969264	112969357	13163	0,2	48,52	39,26	153182	125	99	3.0052e-07	3.16171e-05	0.0,0.03	0.168,0.102	-0.12
5241	ENSMUSG00000026456.18	Cyb5r1	chr1	+	134407816	134408487	134408403	134408487	134407573	134407703	5241	71,89	218176	356221	328375	198	99	0.000297919	0.0105417	0.14,0.202	0.352,0.228	-0.119
23414	ENSMUSG00000068917.12	Clk2	chr3	+	89169963	89170115	89170048	89170115	89169617	89169702	23414	2,2	83,59	31,22	84104	184	99	2.2027e-09	3.92108e-07	0.013,0.018	0.166,0.102	-0.119
25421	ENSMUSG00000024413.14	Npc1	chr18	-	12195008	12195427	12195008	12195209	12196483	12196613	25421	6,8	163119	10,5	16,46	198	99	0.000632211	0.0189208	0.018,0.033	0.238,0.052	-0.119
32424	ENSMUSG00000053332.13	Gas5	chr1	+	161036525	161036852	161036819	161036852	161035982	161036014	32424	224226	37,23	1360933	52,57	198	99	1.63948e-06	0.000137146	0.752,0.831	0.929,0.891	-0.119
35964	ENSMUSG00000033808.16	Tmem87a	chr2	-	120403726	120403996	120403726	120403960	120404071	120404113	35964	27,25	4,2	104,85	1,1	135	99	0.00180629	0.0421306	0.832,0.902	0.987,0.984	-0.119
3424	ENSMUSG00000010453.12	Kansl3	chr1	-	36365481	36365652	36365481	36365632	36367749	36368034	3424	102,74	14,13	52,39	1,2	119	99	0.000450818	0.0146658	0.858,0.826	0.977,0.942	-0.118
6065	ENSMUSG00000075415.13	Fnbp1	chr2	-	31052984	31053137	31052984	31053080	31054023	31054218	6065	56,31	6,2	18,16	0,0	156	99	0.000845638	0.0236688	0.856,0.908	1.0,1.0	-0.118
20892	ENSMUSG00000013787.15	Ehmt2	chr17	+	34905633	34906058	34905909	34906058	34905341	34905456	20892	36,24	455408	53,41	147116	198	99	7.77156e-16	3.7189e-13	0.038,0.029	0.153,0.15	-0.118
24951	ENSMUSG00000027371.10	Fahd2a	chr2	-	127438112	127438326	127438112	127438272	127438509	127438569	24951	0,0	10,6	17,6	49,69	153	99	0.000371389	0.0125688	0.0,0.0	0.183,0.053	-0.118
1614	ENSMUSG00000022884.15	Eif4a2	chr16	+	23108584	23108633	23108587	23108633	23107758	23107820	1614	413360	14711500	457397	970804	102	99	8.98541e-08	1.11698e-05	0.214,0.189	0.314,0.324	-0.117
4611	ENSMUSG00000058291.14	Zfp68	chr5	-	138616469	138616565	138616469	138616559	138617054	138617167	4611	165113	59,48	697699	161121	105	99	0.000117332	0.00502565	0.725,0.689	0.803,0.845	-0.117
47355	ENSMUSG00000031939.16	Taf1d	chr9	+	15307646	15307777	15307727	15307777	15306872	15306990	47355	140,95	324292	189168	282207	180	99	4.00721e-06	0.000296727	0.192,0.152	0.269,0.309	-0.117
4559	ENSMUSG00000060261.15	Gtf2i	chr5	-	134243506	134243599	134243506	134243587	134243900	134243956	4559	244242	359333	247224	208210	111	99	0.000428338	0.0140681	0.377,0.393	0.514,0.488	-0.116
10687	ENSMUSG00000033762.8	Recql4	chr15	-	76709767	76709928	76709767	76709908	76710100	76710198	10687	0,0	29,28	5,6	41,31	119	99	0.000105496	0.00464382	0.0,0.0	0.092,0.139	-0.116
27210	ENSMUSG00000027282.17	Mtch2	chr2	+	90852839	90853062	90853050	90853062	90849597	90849704	27210	13621207	135,88	42424041	57,70	198	99	0	0	0.835,0.873	0.974,0.967	-0.116
44655	ENSMUSG00000031878.18	Nae1	chr8	-	104527082	104527162	104527082	104527118	104530055	104530116	44655	110,87	9,9	400374	1,0	143	99	3.08126e-10	6.81479e-08	0.894,0.87	0.996,1.0	-0.116
360	ENSMUSG00000062753.14	AI413582	chr17	-	27564148	27564410	27564148	27564339	27564561	27564750	360	162125	11,12	484400	0,4	170	99	1.51234e-10	3.56104e-08	0.896,0.858	1.0,0.983	-0.115
30332	ENSMUSG00000021339.4	Mrs2	chr13	-	24998793	24999072	24998793	24999055	25001626	25001800	30332	7,11	121125	31,20	111,92	116	99	1.42488e-05	0.000880716	0.047,0.07	0.192,0.156	-0.115
38962	ENSMUSG00000004098.7	Col5a3	chr9	-	20809939	20810101	20809939	20810098	20814865	20815067	38962	152176	17,25	9,1	0,0	102	99	0.000825751	0.0231997	0.897,0.872	1.0,1.0	-0.115
36867	ENSMUSG00000017697.3	Ada	chr2	-	163726583	163727051	163726583	163727048	163727543	163727643	36867	0,0	9,3	14,6	74,73	102	99	0.000811952	0.0229389	0.0,0.0	0.155,0.074	-0.114
38851	ENSMUSG00000007812.16	Zfp655	chr5	+	145235722	145235863	145235736	145235863	145233440	145233602	38851	0,0	9,12	6,2	37,15	113	99	0.00129558	0.0328157	0.0,0.0	0.124,0.105	-0.114
3518	ENSMUSG00000026159.13	Agfg1	chr1	+	82894475	82894567	82894481	82894567	82893423	82893582	3518	256274	97,85	347405	62,68	105	99	2.13948e-05	0.00124334	0.713,0.752	0.841,0.849	-0.113
1012	ENSMUSG00000074794.10	Arrdc3	chr13	+	80891449	80891642	80891487	80891642	80891061	80891224	1012	15,15	172179	31,27	96110	137	99	2.36403e-06	0.000191633	0.059,0.057	0.189,0.151	-0.112
5000	ENSMUSG00000035569.17	Ankrd11	chr8	-	122899978	122900183	122899978	122900149	122908667	122908806	5000	37,26	522472	30,25	112109	133	99	2.74578e-09	4.83262e-07	0.05,0.039	0.166,0.146	-0.112
17374	ENSMUSG00000052373.14	Mpp3	chr11	-	102016626	102016780	102016626	102016701	102018621	102018707	17374	0,0	6,2	11,6	37,37	178	99	0.000851926	0.0238149	0.0,0.0	0.142,0.083	-0.112
36062	ENSMUSG00000031834.15	Pik3r2	chr8	-	70772602	70772953	70772602	70772695	70774655	70775352	36062	6,5	213267	75,97	288321	198	99	0	0	0.014,0.009	0.115,0.131	-0.112
48129	ENSMUSG00000036986.16	Pml	chr9	-	58229985	58230364	58229985	58230086	58230490	58230628	48129	5,1	23,31	21,23	56,52	198	99	0.000584899	0.0179022	0.098,0.016	0.158,0.181	-0.112
25670	ENSMUSG00000026556.15	Vangl2	chr1	-	172008525	172008918	172008525	172008643	172009440	172010048	25670	1,4	85,40	23,8	45,51	198	99	1.35519e-06	0.000117335	0.006,0.048	0.204,0.073	-0.111
42938	ENSMUSG00000038695.13	Josd2	chr7	+	44470861	44471307	44471112	44471307	44470411	44470537	42938	20,12	188155	117103	302297	198	99	1.60947e-11	4.74345e-09	0.051,0.037	0.162,0.148	-0.111
2275	ENSMUSG00000030035.14	Wbp1	chr6	-	83120184	83120876	83120184	83120287	83121202	83121559	2275	278249	139120	409415	120139	198	99	0.00188804	0.0435355	0.5,0.509	0.63,0.599	-0.11
3349	ENSMUSG00000025212.17	Sfxn3	chr19	+	45050635	45050725	45050649	45050725	45050227	45050326	3349	1,2	138118	15,6	72,55	113	99	4.06333e-08	5.39792e-06	0.006,0.015	0.154,0.087	-0.11
7342	ENSMUSG00000024968.14	Rcor2	chr19	+	7269737	7269821	7269764	7269821	7268850	7269088	7342	14,18	578511	39,58	212280	126	99	0	0	0.019,0.027	0.126,0.14	-0.11
3496	ENSMUSG00000004937.6	Sgta	chr10	-	81050998	81051086	81050998	81051083	81051222	81051329	3496	95,82	435349	144161	353375	102	99	2.32219e-05	0.0013352	0.175,0.186	0.284,0.294	-0.108
7141	ENSMUSG00000063698.9	Sfxn4	chr19	-	60850958	60851456	60850958	60851074	60852011	60852090	7141	0,1	10,8	8,5	16,31	198	99	0.00175875	0.041325	0.0,0.059	0.2,0.075	-0.108
3134	ENSMUSG00000026150.14	Mff	chr1	+	82735415	82735507	82735418	82735507	82731112	82731282	3134	350270	651608	660637	836836	102	99	8.87779e-05	0.00403819	0.343,0.301	0.434,0.425	-0.107
6030	ENSMUSG00000021704.8	Mtx3	chr13	+	92846817	92846953	92846860	92846953	92845620	92845697	6030	2,3	38,15	23,21	64,71	142	99	0.00149011	0.0365571	0.035,0.122	0.2,0.171	-0.107
32432	ENSMUSG00000053332.13	Gas5	chr1	+	161036525	161036852	161036819	161036852	161036207	161036244	32432	224226	32,13	1357933	44,24	198	99	4.28013e-06	0.000313803	0.778,0.897	0.939,0.951	-0.107
32437	ENSMUSG00000053332.13	Gas5	chr1	+	161036604	161036852	161036819	161036852	161036207	161036244	32437	224226	32,13	1357933	44,24	198	99	4.28013e-06	0.000313803	0.778,0.897	0.939,0.951	-0.107
17990	ENSMUSG00000022178.11	Ajuba	chr14	-	54571765	54572227	54571765	54571833	54573391	54573493	17990	21,20	201169	136,92	279330	198	99	8.04065e-10	1.61186e-07	0.05,0.056	0.196,0.122	-0.106
27503	ENSMUSG00000028582.14	Cc2d1b	chr4	+	108625307	108625533	108625407	108625533	108624845	108625004	27503	5,5	80,84	29,35	106,99	198	99	1.41344e-07	1.65969e-05	0.03,0.029	0.12,0.15	-0.106
29228	ENSMUSG00000040964.16	Arhgef10l	chr4	-	140568308	140568770	140568308	140568520	140570256	140570402	29228	13,11	156137	40,35	107114	198	99	1.46842e-08	2.16388e-06	0.04,0.039	0.157,0.133	-0.106
32436	ENSMUSG00000053332.13	Gas5	chr1	+	161036555	161036852	161036819	161036852	161036207	161036244	32436	227229	32,13	1357932	44,24	198	99	5.15217e-06	0.000368628	0.78,0.898	0.939,0.951	-0.106
38675	ENSMUSG00000036639.12	Nudt1	chr5	+	140332401	140332473	140332422	140332473	140331908	140331955	38675	2,0	27,18	30,18	124130	120	99	0.000805251	0.022782	0.058,0.0	0.166,0.103	-0.106
2294	ENSMUSG00000035798.14	Zdhhc17	chr10	-	110967683	110967846	110967683	110967805	110973747	110973892	2294	41,32	3,3	74,62	0,0	140	99	0.00204793	0.0464285	0.906,0.883	1.0,1.0	-0.105
41152	ENSMUSG00000033106.6	Slc7a6os	chr8	-	106202230	106202359	106202230	106202351	106204330	106204540	41152	10,18	162151	94,78	316415	107	99	6.94711e-06	0.000474183	0.054,0.099	0.216,0.148	-0.105
46531	ENSMUSG00000005150.16	Wdr83	chr8	-	85079788	85079873	85079788	85079837	85080119	85080225	46531	5,6	96,84	24,12	69,85	135	99	0.000124906	0.005294	0.037,0.05	0.203,0.094	-0.105
49695	ENSMUSG00000020085.15	Aifm2	chr10	+	61735454	61735658	61735457	61735658	61734276	61734429	49695	2,5	74,75	10,14	58,74	102	99	0.000560741	0.0173537	0.026,0.061	0.143,0.155	-0.105
41854	ENSMUSG00000025159.8	Mms19	chr19	-	41949454	41949592	41949454	41949581	41949768	41949837	41854	0,4	262201	17,9	85102	110	99	3.09325e-10	6.81479e-08	0.0,0.018	0.153,0.074	-0.104
1932	ENSMUSG00000041530.16	Ago1	chr4	-	126460366	126460585	126460366	126460503	126460905	126461087	1932	6,16	90,62	16,17	45,37	181	99	0.00178097	0.0417417	0.035,0.124	0.163,0.201	-0.102
5968	ENSMUSG00000032815.16	Fanca	chr8	-	123269289	123269462	123269289	123269362	123269859	123269965	5968	1,0	21,7	14,21	78,62	198	99	0.000201482	0.00780377	0.023,0.0	0.082,0.145	-0.102
49084	ENSMUSG00000025650.13	Col7a1	chr9	+	108982624	108982722	108982673	108982722	108982469	108982523	49084	7,3	81,93	23,13	78,67	148	99	1.96615e-05	0.00116356	0.055,0.021	0.165,0.115	-0.102
4521	ENSMUSG00000029422.15	Rsrc2	chr5	-	123740671	123740884	123740671	123740862	123743637	123743678	4521	35,43	731621	111,66	383478	121	99	7.43372e-12	2.26591e-09	0.038,0.054	0.192,0.102	-0.101
39653	ENSMUSG00000002968.9	Med25	chr7	-	44884118	44884250	44884118	44884247	44884562	44884733	39653	25,24	212182	36,32	115137	102	99	0.000558499	0.0173205	0.103,0.113	0.233,0.185	-0.101
47151	ENSMUSG00000018800.14	Abca5	chr11	-	110327731	110327936	110327731	110327893	110329136	110329256	47151	45,36	8,0	7,15	0,0	142	99	0.00167876	0.0399732	0.797,1.0	1.0,1.0	-0.101
186	ENSMUSG00000024851.14	Pitpnm1	chr19	+	4110841	4110990	4110947	4110990	4110494	4110659	186	325299	1,2	292288	18,18	198	99	1.55015e-09	2.87444e-07	0.994,0.987	0.89,0.889	0.101
2127	ENSMUSG00000021112.9	Mpp5	chr12	+	78796865	78797390	78797102	78797390	78794244	78794333	2127	473384	20,12	143181	15,18	198	99	0.000367536	0.0124835	0.922,0.941	0.827,0.834	0.101
11651	ENSMUSG00000022214.15	Dcaf11	chr14	+	55561074	55561419	55561212	55561419	55560533	55560627	11651	55,38	0,0	104,88	7,4	198	99	0.000281245	0.0100856	1.0,1.0	0.881,0.917	0.101
26998	ENSMUSG00000029521.7	Chek2	chr5	+	110841205	110841543	110841218	110841543	110839999	110840048	26998	26,29	0,0	136158	13,16	112	99	7.17209e-05	0.00339037	1.0,1.0	0.902,0.897	0.101
34690	ENSMUSG00000039834.17	Zfp335	chr2	-	164907427	164907577	164907427	164907574	164907652	164907958	34690	9,11	62,59	5,1	77,62	102	99	0.00120621	0.0310289	0.123,0.153	0.059,0.015	0.101
44533	ENSMUSG00000036636.10	Clcn7	chr17	+	25153731	25153825	25153744	25153825	25153015	25153154	44533	89,65	0,4	86,90	10,14	112	99	0.000112813	0.00488855	1.0,0.935	0.884,0.85	0.101
22404	ENSMUSG00000053819.16	Camk2d	chr3	+	126842757	126843218	126842959	126843218	126841484	126841573	22404	117129	2,0	47,56	6,1	198	99	0.00213458	0.0479691	0.967,1.0	0.797,0.966	0.102
44541	ENSMUSG00000033904.16	Ccp110	chr7	+	118724454	118724585	118724457	118724585	118721614	118723038	44541	19,13	1,0	46,49	4,10	102	99	0.0014409	0.0357838	0.949,1.0	0.918,0.826	0.102
6328	ENSMUSG00000024735.13	Prpf19	chr19	+	10898925	10899124	10898982	10899124	10897816	10897893	6328	342337	791677	310382	13051822	156	99	5.53126e-10	1.16112e-07	0.215,0.24	0.131,0.117	0.103
8678	ENSMUSG00000024299.17	Adamts10	chr17	+	33545303	33545437	33545314	33545437	33544954	33545057	8678	7,8	0,0	56,49	7,4	110	99	0.00142036	0.0353526	1.0,1.0	0.878,0.917	0.103
14715	ENSMUSG00000020687.13	Cdc27	chr11	-	104526862	104527055	104526862	104526977	104528262	104528474	14715	38,32	134118	21,12	248352	177	99	9.63307e-12	2.87719e-09	0.137,0.132	0.045,0.019	0.103
22873	ENSMUSG00000027865.10	Gdap2	chr3	+	100186569	100186729	100186607	100186729	100182676	100182753	22873	20,21	1,0	53,45	3,8	137	99	0.00200999	0.0457781	0.935,1.0	0.927,0.803	0.103
818	ENSMUSG00000040651.9	Tasor	chr14	+	27480641	27483555	27480915	27483555	27479923	27480091	818	61,39	2,0	170139	12,12	198	99	0.00216192	0.0483963	0.938,1.0	0.876,0.853	0.104
29336	ENSMUSG00000085396.7	Firre	chrX	-	50612104	50612241	50612104	50612237	50612704	50612850	29336	9,3	0,0	52,46	2,9	103	99	0.00190488	0.0437651	1.0,1.0	0.962,0.831	0.104
34863	ENSMUSG00000026238.14	Ptma	chr1	+	86529574	86529804	86529730	86529804	86529172	86529244	34863	363279	29,28	470540	92,82	198	99	0.000265567	0.00965566	0.862,0.833	0.719,0.767	0.104
36283	ENSMUSG00000098374.1	Gm28043	chr17	+	29685850	29686049	29685908	29686049	29682121	29682194	36283	200158	0,3	150170	13,14	157	99	1.86879e-07	2.10549e-05	1.0,0.971	0.879,0.884	0.104
37292	ENSMUSG00000028211.11	Trp53inp1	chr4	+	11165089	11165447	11165293	11165447	11164458	11164569	37292	76,84	2,1	282308	27,21	198	99	0.000284125	0.0101643	0.95,0.977	0.839,0.88	0.104
22542	ENSMUSG00000000339.14	Rtca	chr3	-	116504344	116504488	116504344	116504446	116506834	116506993	22542	87101	4,0	94108	12,10	141	99	0.000162538	0.00655203	0.939,1.0	0.846,0.883	0.105
44829	ENSMUSG00000030816.8	Rnf40	chr7	+	127591281	127591436	127591314	127591436	127590506	127590713	44829	30,28	90,76	13,19	99108	132	99	0.00134509	0.0339154	0.2,0.216	0.09,0.117	0.105
3990	ENSMUSG00000052337.15	Immt	chr6	+	71852729	71852867	71852762	71852867	71851771	71851880	3990	483426	331209	747912	671799	132	99	0.00166348	0.0397583	0.523,0.605	0.455,0.461	0.106
9461	ENSMUSG00000071533.11	Pcnp	chr16	-	56024223	56024637	56024223	56024438	56026268	56026379	9461	300258	0,0	105,97	3,9	198	99	1.47404e-06	0.000125714	1.0,1.0	0.946,0.843	0.106
44376	ENSMUSG00000023942.15	Slc29a1	chr17	-	45587227	45587325	45587227	45587309	45587561	45587670	44376	37,12	0,0	33,36	5,2	115	99	0.00171489	0.0405946	1.0,1.0	0.85,0.939	0.106
1792	ENSMUSG00000042508.16	Dmtf1	chr5	-	9130367	9130652	9130367	9130477	9131275	9131308	1792	67,36	133113	27,26	203194	198	99	4.79633e-08	6.24126e-06	0.201,0.137	0.062,0.063	0.107
14495	ENSMUSG00000020776.18	Fbf1	chr11	-	116147903	116148043	116147903	116148018	116148120	116148228	14495	51,15	0,0	58,36	2,6	124	99	0.000836483	0.0234273	1.0,1.0	0.959,0.827	0.107
1793	ENSMUSG00000042508.16	Dmtf1	chr5	-	9130367	9130693	9130367	9130477	9131275	9131308	1793	58,33	133113	20,17	203194	198	99	8.39056e-10	1.67446e-07	0.179,0.127	0.047,0.042	0.108
2162	ENSMUSG00000021417.15	Eci2	chr13	-	34993067	34993230	34993067	34993220	34994013	34994144	2162	217141	37,37	315305	108133	109	99	0.000375926	0.0127126	0.842,0.776	0.726,0.676	0.108
18026	ENSMUSG00000001120.15	Pcbp3	chr10	-	76763221	76763391	76763221	76763384	76767863	76767916	18026	32,19	0,1	23,20	6,1	106	99	0.00170302	0.0403996	1.0,0.947	0.782,0.949	0.108
18300	ENSMUSG00000024556.4	Me2	chr18	-	73773129	73773599	73773129	73773228	73775378	73775449	18300	174176	684607	13,12	466586	198	99	0	0	0.113,0.127	0.014,0.01	0.108
45871	ENSMUSG00000031592.10	Pcm1	chr8	+	41259038	41259266	41259135	41259266	41257790	41258036	45871	4,4	23,13	0,0	13,13	196	99	0.00146583	0.0361916	0.081,0.135	0.0,0.0	0.108
793	ENSMUSG00000022827.14	Rabl3	chr16	+	37563615	37563766	37563668	37563766	37559994	37560109	793	80,59	1,1	96110	12,8	152	99	8.2351e-05	0.00380963	0.981,0.975	0.839,0.9	0.109
18123	ENSMUSG00000013495.15	Tmem175	chr5	+	108644404	108644692	108644556	108644692	108644167	108644246	18123	4,3	14,12	1,1	55,58	198	99	0.000737321	0.0212691	0.125,0.111	0.009,0.009	0.109
43409	ENSMUSG00000040738.10	Ints8	chr4	-	11239306	11239462	11239306	11239431	11241580	11241688	43409	166144	5,13	154190	35,22	130	99	0.000236578	0.00888488	0.962,0.894	0.77,0.868	0.109
47292	ENSMUSG00000071302.10	2610044O15Rik8	chr8	-	129221543	129221990	129221543	129221904	129233904	129234046	47292	4,4	0,0	50,65	2,6	185	99	0.00195528	0.0448073	1.0,1.0	0.93,0.853	0.109
3278	ENSMUSG00000026584.14	Scyl3	chr1	+	163934631	163934817	163934692	163934817	163933478	163933693	3278	67,65	4,0	112119	14,12	160	99	0.00140719	0.035123	0.912,1.0	0.832,0.86	0.11
4336	ENSMUSG00000027624.19	Epb41l1	chr2	+	156510732	156510881	156510756	156510881	156509131	156509307	4336	282253	15,11	264309	51,41	123	99	2.20126e-07	2.42881e-05	0.938,0.949	0.806,0.858	0.111
11634	ENSMUSG00000079197.10	Psme2	chr14	-	55589480	55589909	55589480	55589702	55590032	55590149	11634	52,43	0,0	153139	14,5	198	99	5.76586e-05	0.00283326	1.0,1.0	0.845,0.933	0.111
12775	ENSMUSG00000035139.14	Secisbp2	chr13	+	51682443	51682633	51682449	51682633	51681999	51682154	12775	35,21	0,0	42,43	6,4	105	99	0.00026351	0.00959655	1.0,1.0	0.868,0.91	0.111
25890	ENSMUSG00000075232.5	Amd1	chr10	-	40293163	40293285	40293163	40293245	40294180	40294307	25890	19,10	0,1	95,93	14,14	139	99	0.00085438	0.0238535	1.0,0.877	0.829,0.826	0.111
36403	ENSMUSG00000020576.10	Nbas	chr12	+	13474126	13474237	13474129	13474237	13469840	13470070	36403	69,57	1,0	26,27	3,4	102	99	0.000683734	0.0200979	0.985,1.0	0.894,0.868	0.111
43259	ENSMUSG00000033790.11	Tubgcp5	chr7	+	55816457	55816656	55816504	55816656	55814859	55815128	43259	23,25	0,0	77,60	11,2	146	99	0.000259059	0.00947321	1.0,1.0	0.826,0.953	0.111
3928	ENSMUSG00000021288.18	Klc1	chr12	+	111789324	111789486	111789348	111789486	111787487	111787596	3928	257249	97,72	300357	160197	123	99	0.000920912	0.0252984	0.681,0.736	0.601,0.593	0.112
4592	ENSMUSG00000029705.17	Cux1	chr5	-	136312642	136313314	136312642	136313008	136314306	136314403	4592	130108	4,0	123,97	10,8	198	99	0.000388437	0.0129975	0.942,1.0	0.86,0.858	0.112
21854	ENSMUSG00000028689.14	Ccdc163	chr4	+	116709239	116709619	116709437	116709619	116708888	116709094	21854	69,61	0,3	102,65	13,4	198	99	0.00171607	0.0406008	1.0,0.91	0.797,0.89	0.112
41620	ENSMUSG00000030435.16	U2af2	chr7	+	5067209	5067574	5067543	5067574	5066402	5066538	41620	15291423	17,9	20372478	178150	198	99	0	0	0.978,0.988	0.851,0.892	0.112
3138	ENSMUSG00000041718.15	Alg13	chrX	+	144319898	144320061	144320002	144320061	144318022	144318121	3138	167131	11,7	343282	38,49	198	99	0.00120125	0.0309191	0.884,0.903	0.819,0.742	0.113
14958	ENSMUSG00000049807.16	Arhgap23	chr11	+	97448110	97448265	97448169	97448265	97446508	97446551	14958	5,6	30,22	1,0	42,23	158	99	0.000146285	0.0060001	0.095,0.146	0.015,0.0	0.113
1043	ENSMUSG00000091803.7	Cox16	chr12	-	81472092	81472351	81472092	81472171	81474586	81474649	1043	567475	60,35	11911071	215193	198	99	5.31506e-06	0.000378457	0.825,0.872	0.735,0.735	0.114
1203	ENSMUSG00000018433.14	Nol11	chr11	-	107173209	107173461	107173209	107173401	107173603	107173729	1203	254226	4,3	328417	37,36	159	99	1.76705e-09	3.22291e-07	0.975,0.979	0.847,0.878	0.114
3775	ENSMUSG00000023079.14	Gtf2ird1	chr5	-	134382529	134382685	134382529	134382586	134382780	134382830	3775	100116	138140	50,46	111133	198	99	0.000131043	0.00548616	0.266,0.293	0.184,0.147	0.114
3308	ENSMUSG00000039239.14	Tgfb2	chr1	-	186630609	186630787	186630609	186630672	186632457	186632568	3308	103,70	0,1	46,65	2,7	198	99	0.000144585	0.00594682	1.0,0.972	0.92,0.823	0.115
5429	ENSMUSG00000030979.13	Uros	chr7	-	133690507	133691166	133690507	133690593	133697668	133697743	5429	14,5	0,0	171168	9,13	198	99	0.00098453	0.0265597	1.0,1.0	0.905,0.866	0.115
4124	ENSMUSG00000039990.16	Edrf1	chr7	+	133660070	133660294	133660135	133660294	133658425	133658644	4124	50,62	0,1	103123	12,8	164	99	4.72059e-05	0.00237917	1.0,0.974	0.838,0.903	0.116
8492	ENSMUSG00000024462.17	Gabbr1	chr17	+	37067775	37067908	37067785	37067908	37064659	37064737	8492	22,15	0,0	43,23	3,4	109	99	0.00204166	0.0463098	1.0,1.0	0.929,0.839	0.116
9892	ENSMUSG00000022677.15	Fopnl	chr16	-	14304453	14304564	14304453	14304540	14311046	14311131	9892	28,39	0,0	107,70	5,12	123	99	8.35813e-05	0.00385497	1.0,1.0	0.945,0.824	0.116
43939	ENSMUSG00000032812.18	Arap1	chr7	+	101400882	101400988	101400884	101400988	101400391	101400604	43939	31,46	0,0	31,37	3,6	101	99	0.00017351	0.0069191	1.0,1.0	0.91,0.858	0.116
20162	ENSMUSG00000060098.11	Prmt7	chr8	+	106241060	106241313	106241227	106241313	106237221	106237402	20162	34,18	1,0	77102	7,8	198	99	0.00123511	0.0316443	0.944,1.0	0.846,0.864	0.117
21225	ENSMUSG00000057541.14	Pus7	chr5	-	23742343	23742763	23742343	23742430	23743416	23743546	21225	18,8	0,0	33,39	0,6	198	99	0.00145554	0.0360265	1.0,1.0	1.0,0.765	0.117
24450	ENSMUSG00000037364.12	Srrt	chr5	-	137301317	137301647	137301317	137301641	137302125	137302314	24450	10,11	0,0	35,30	3,5	105	99	0.00135989	0.0342093	1.0,1.0	0.917,0.85	0.117
35468	ENSMUSG00000023923.10	Tbc1d5	chr17	-	50984604	50984674	50984604	50984671	51025073	51025204	35468	53,65	0,0	48,27	0,8	102	99	0.000589596	0.0179973	1.0,1.0	1.0,0.766	0.117
1121	ENSMUSG00000020608.7	Smc6	chr12	+	11297102	11297285	11297149	11297285	11294922	11295083	1121	33,47	164144	19,10	289296	146	99	1.36546e-12	4.53487e-10	0.12,0.181	0.043,0.022	0.118
2342	ENSMUSG00000026641.13	Usf1	chr1	+	171414372	171414529	171414436	171414529	171411680	171411862	2342	153134	1,5	99,78	8,11	163	99	0.000113186	0.0048999	0.989,0.942	0.883,0.812	0.118
16390	ENSMUSG00000020282.18	Rhbdf1	chr11	-	32214392	32214622	32214392	32214483	32214909	32215123	16390	94,76	1,0	114115	11,6	198	99	2.01413e-05	0.00118408	0.979,1.0	0.838,0.906	0.118
17289	ENSMUSG00000005682.9	Pan2	chr10	+	128315513	128315657	128315601	128315657	128315097	128315236	17289	75,83	0,0	63,56	7,2	187	99	6.9415e-05	0.00330747	1.0,1.0	0.827,0.937	0.118
28962	ENSMUSG00000029319.8	Coq2	chr5	-	100663579	100663900	100663579	100663701	100667891	100668058	28962	65,38	122105	131,82	789801	198	99	5.90128e-12	1.83654e-09	0.21,0.153	0.077,0.049	0.118
678	ENSMUSG00000022412.14	Mief1	chr15	+	80248240	80248503	80248326	80248503	80247873	80248051	678	150104	10,8	184200	30,34	185	99	0.00146978	0.036218	0.889,0.874	0.766,0.759	0.119
4184	ENSMUSG00000025157.8	Zdhhc16	chr19	+	41938719	41938836	41938807	41938836	41938363	41938452	4184	51,43	97,79	94,64	354385	187	99	1.1201e-06	9.93546e-05	0.218,0.224	0.123,0.081	0.119
32256	ENSMUSG00000036902.11	Neto2	chr8	-	85663132	85663431	85663132	85663306	85669533	85669782	32256	13,14	0,0	61,65	8,1	198	99	0.00124088	0.0317556	1.0,1.0	0.792,0.97	0.119
35699	ENSMUSG00000037174.18	Elf2	chr3	-	51264861	51265042	51264861	51265006	51265812	51266045	35699	83,97	1,1	85,81	6,13	135	99	5.80124e-06	0.000408501	0.984,0.986	0.912,0.82	0.119
37205	ENSMUSG00000039069.19	Mtg2	chr2	+	180078003	180078142	180078077	180078142	180073139	180073233	37205	16,11	0,0	153109	4,15	173	99	0.000768776	0.0219032	1.0,1.0	0.956,0.806	0.119
1702	ENSMUSG00000024924.14	Vldlr	chr19	+	27241234	27241453	27241299	27241453	27240465	27240637	1702	392361	4,5	94168	14,9	164	99	3.77812e-07	3.83002e-05	0.983,0.978	0.802,0.918	0.12
13247	ENSMUSG00000007411.16	Mark3	chr12	+	111628961	111629115	111629009	111629115	111628189	111628302	13247	239213	17,14	341398	66,68	147	99	4.89605e-06	0.000354291	0.904,0.911	0.777,0.798	0.12
26172	ENSMUSG00000037426.18	Depdc5	chr5	+	32901656	32901904	32901829	32901904	32901455	32901559	26172	9,3	16,23	4,5	104107	198	99	0.000259919	0.00948909	0.22,0.061	0.019,0.023	0.12
38839	ENSMUSG00000029625.16	Cpsf4	chr5	+	145178535	145178928	145178832	145178928	145177229	145177302	38839	40,50	64,53	88,83	218238	198	99	0.00051683	0.0162901	0.238,0.321	0.168,0.148	0.121
44705	ENSMUSG00000025494.8	Sigirr	chr7	-	141092977	141093324	141092977	141093118	141093726	141093925	44705	3,11	0,0	43,35	5,1	198	99	0.00158048	0.038295	1.0,1.0	0.811,0.946	0.121
465	ENSMUSG00000050312.12	Nsun3	chr16	-	62776287	62776631	62776287	62776383	62786670	62786777	465	8,3	0,0	6,31	0,5	198	99	0.00202243	0.0459675	1.0,1.0	1.0,0.756	0.122
2695	ENSMUSG00000038733.14	Wdr26	chr1	-	181203023	181203224	181203023	181203160	181209002	181209107	2695	52,50	89,87	21,22	80,85	163	99	0.000382951	0.0128622	0.262,0.259	0.138,0.136	0.123
3132	ENSMUSG00000027751.13	Supt20	chr3	+	54722520	54722640	54722556	54722640	54720405	54720461	3132	159113	13,3	99,87	15,17	135	99	0.000708326	0.0206155	0.9,0.965	0.829,0.79	0.123
14371	ENSMUSG00000061306.16	Slc38a10	chr11	-	120138985	120139121	120138985	120139092	120140592	120140686	14371	91,69	7,3	70115	14,20	128	99	0.00145543	0.0360265	0.91,0.947	0.795,0.816	0.123
24482	ENSMUSG00000028822.11	Tmem50a	chr4	-	134913090	134913253	134913090	134913167	134914888	134915024	24482	183146	4,1	284305	28,27	185	99	3.7728e-07	3.83002e-05	0.961,0.987	0.844,0.858	0.123
28116	ENSMUSG00000053646.13	Plxnb1	chr9	+	109104733	109105408	109105310	109105408	109104222	109104331	28116	50,20	1,0	85,63	6,6	198	99	0.000793827	0.0225017	0.962,1.0	0.876,0.84	0.123
31626	ENSMUSG00000011958.17	Bnip2	chr9	+	69998044	69998306	69998279	69998306	69997175	69997257	31626	2,2	0,0	61,53	10,0	198	99	0.00183982	0.0426871	1.0,1.0	0.753,1.0	0.123
34475	ENSMUSG00000039108.14	Lsm14b	chr2	+	180031793	180032138	180032060	180032138	180031360	180031528	34475	362349	2,3	297328	24,26	198	99	6.63991e-12	2.05206e-09	0.989,0.983	0.861,0.863	0.124
31862	ENSMUSG00000063200.4	Nol7	chr13	+	43401300	43401577	43401499	43401577	43400852	43400934	31862	23,16	0,0	31,43	1,5	198	99	0.00126252	0.0322166	1.0,1.0	0.939,0.811	0.125
44830	ENSMUSG00000030816.8	Rnf40	chr7	+	127591299	127591436	127591314	127591436	127590506	127590713	44830	19,35	90,76	11,14	99108	114	99	0.000927278	0.0253699	0.155,0.286	0.088,0.101	0.126
3524	ENSMUSG00000027206.13	Cops2	chr2	-	125842621	125842732	125842621	125842711	125844809	125844935	3524	932798	779725	518651	762949	120	99	3.97954e-06	0.000295169	0.497,0.476	0.359,0.361	0.127
4096	ENSMUSG00000018819.10	Lsp1	chr7	+	142488847	142488940	142488865	142488940	142488418	142488515	4096	168137	43,39	199321	112140	117	99	0.000524868	0.0165192	0.768,0.748	0.601,0.66	0.127
5736	ENSMUSG00000040856.17	Dlk1	chr12	+	109460045	109463336	109460117	109463336	109459606	109459892	5736	1182982	157125	509563	122160	171	99	2.73214e-07	2.90881e-05	0.813,0.82	0.707,0.671	0.127
8895	ENSMUSG00000073434.12	Wdr90	chr17	-	25860018	25860133	25860018	25860116	25860371	25860817	8895	36,19	0,0	43,28	10,1	116	99	8.42081e-05	0.00387941	1.0,1.0	0.786,0.96	0.127
30407	ENSMUSG00000039298.16	Cdk5rap2	chr4	-	70281089	70281528	70281089	70281522	70289844	70290029	30407	8,16	82,57	1,1	43,50	105	99	2.32848e-05	0.00133709	0.084,0.209	0.021,0.019	0.127
19665	ENSMUSG00000004591.16	Pkn2	chr3	-	142810360	142810476	142810360	142810434	142810690	142810865	19665	27,26	0,0	34,34	4,3	141	99	0.00104614	0.0278928	1.0,1.0	0.856,0.888	0.128
26504	ENSMUSG00000006058.10	Snf8	chr11	+	96046279	96047430	96047194	96047430	96045162	96045302	26504	109126	12,6	407408	73,71	198	99	0.00111735	0.0294582	0.82,0.913	0.736,0.742	0.128
27144	ENSMUSG00000019054.13	Fis1	chr5	+	136964195	136964395	136964208	136964395	136962998	136963131	27144	5,2	19,17	1,0	32,7	112	99	0.00183052	0.0425399	0.189,0.094	0.027,0.0	0.128
47455	ENSMUSG00000025781.14	Atp5c1	chr2	-	10063285	10063623	10063285	10063350	10064106	10064311	47455	50,32	0,0	96,94	8,6	198	99	7.14064e-05	0.00338424	1.0,1.0	0.857,0.887	0.128
1611	ENSMUSG00000042570.14	Mier2	chr10	-	79549536	79549853	79549536	79549679	79550315	79550406	1611	42,43	52,63	36,27	101,89	198	99	0.000349986	0.0120088	0.288,0.254	0.151,0.132	0.13
4132	ENSMUSG00000089824.10	Rbm12	chr2	-	156103348	156103429	156103348	156103397	156111785	156111956	4132	83,50	8,7	158171	35,56	131	99	0.00146451	0.0361916	0.887,0.844	0.773,0.698	0.13
34308	ENSMUSG00000061136.14	Prpf40a	chr2	-	53145823	53145927	53145823	53145915	53146093	53146208	34308	130143	293264	77,84	309370	111	99	1.48597e-06	0.000126444	0.284,0.326	0.182,0.168	0.13
629	ENSMUSG00000022550.18	Adck5	chr15	+	76593430	76593631	76593435	76593631	76593233	76593309	629	58,37	4,3	80154	22,33	104	99	0.000730788	0.0211321	0.932,0.922	0.776,0.816	0.131
2590	ENSMUSG00000018572.10	Phf23	chr11	+	69998300	69999132	69998501	69999132	69997745	69997838	2590	12881059	31,31	756941	81108	198	99	1.11022e-16	5.74515e-14	0.954,0.945	0.824,0.813	0.131
43722	ENSMUSG00000032363.15	Adamts7	chr9	+	90191610	90191962	90191835	90191962	90191364	90191500	43722	9,5	26,17	0,1	27,36	198	99	6.40202e-06	0.000442643	0.148,0.128	0.0,0.014	0.131
3690	ENSMUSG00000042198.12	Chchd7	chr4	+	3939378	3939526	3939423	3939526	3938913	3939131	3690	151111	10,12	258242	56,55	144	99	5.2442e-05	0.00261347	0.912,0.864	0.76,0.752	0.132
17723	ENSMUSG00000035370.9	Gm49322	chr10	+	80609334	80609424	80609391	80609424	80608802	80608850	17723	24,11	0,0	40,43	4,4	156	99	0.000772634	0.021985	1.0,1.0	0.864,0.872	0.132
48893	ENSMUSG00000034893.8	Cog3	chr14	-	75742340	75742502	75742340	75742475	75743565	75743627	48893	6,2	19,16	0,1	12,31	126	99	0.000603463	0.0182818	0.199,0.089	0.0,0.025	0.132
5922	ENSMUSG00000036270.16	Edc4	chr8	+	105889624	105889729	105889672	105889729	105889103	105889540	5922	236205	11,12	176131	38,18	147	99	2.78265e-06	0.000219957	0.935,0.92	0.757,0.831	0.133
20602	ENSMUSG00000041203.9	Trir	chr8	+	85029422	85029616	85029538	85029616	85026822	85027234	20602	125149	391403	34,38	11951232	198	99	0	0	0.138,0.156	0.014,0.015	0.133
26085	ENSMUSG00000055296.14	Tmem245	chr4	-	56899025	56899171	56899025	56899136	56899305	56899428	26085	165118	2,5	86,88	12,14	134	99	3.27207e-06	0.000250631	0.984,0.946	0.841,0.823	0.133
5914	ENSMUSG00000033249.10	Hsf4	chr8	+	105272705	105272933	105272809	105272933	105272459	105272584	5914	120102	1,0	53,63	3,7	198	99	2.61375e-05	0.00146314	0.984,1.0	0.898,0.818	0.134
10341	ENSMUSG00000022387.17	Brd1	chr15	-	88700772	88701237	88700772	88700877	88707033	88707294	10341	5,5	19,14	0,0	29,21	198	99	4.20898e-05	0.00217048	0.116,0.152	0.0,0.0	0.134
502	ENSMUSG00000022855.9	Senp2	chr16	+	22035532	22036646	22036469	22036646	22032103	22032164	502	27,22	63,40	41,29	275261	198	99	1.52871e-07	1.77167e-05	0.176,0.216	0.069,0.053	0.135
28182	ENSMUSG00000038702.6	Dsel	chr1	-	111863237	111863640	111863237	111863506	111864094	111864918	28182	24,25	0,0	45,61	2,7	198	99	0.000292732	0.0104136	1.0,1.0	0.918,0.813	0.135
41535	ENSMUSG00000035585.16	Tsen34	chr7	+	3695352	3695621	3695384	3695621	3694931	3695227	41535	114,74	5,3	146190	40,18	131	99	0.000124718	0.00529105	0.945,0.949	0.734,0.889	0.135
15050	ENSMUSG00000038811.13	Gngt2	chr11	+	95845031	95845140	95845055	95845140	95843811	95843895	15050	4,7	0,0	49,51	4,9	123	99	0.000767329	0.021876	1.0,1.0	0.908,0.82	0.136
40051	ENSMUSG00000035125.10	Gcfc2	chr6	+	81944320	81944520	81944409	81944520	81943428	81943541	40051	23,31	0,1	39,49	5,4	188	99	0.00139521	0.0349416	1.0,0.942	0.804,0.866	0.136
24668	ENSMUSG00000027284.16	Cdan1	chr2	-	120729941	120730370	120729941	120730099	120730468	120730502	24668	14,12	0,0	50,32	2,4	198	99	0.00189688	0.0436264	1.0,1.0	0.926,0.8	0.137
35315	ENSMUSG00000032449.13	Slc25a36	chr9	-	97089490	97089593	97089490	97089527	97089819	97090144	35315	4,2	0,0	44,40	3,5	165	99	0.00126948	0.0323572	1.0,1.0	0.898,0.828	0.137
47599	ENSMUSG00000021704.8	Mtx3	chr13	+	92848917	92849075	92848985	92849075	92847816	92847893	47599	33,22	0,1	37,29	3,5	167	99	0.00105273	0.0280022	1.0,0.929	0.88,0.775	0.137
46498	ENSMUSG00000052926.16	Rnaseh2a	chr8	-	84965316	84965594	84965316	84965443	84965859	84966287	46498	5,11	0,0	34,31	0,6	198	99	0.00135832	0.0341951	1.0,1.0	1.0,0.721	0.139
1076	ENSMUSG00000035021.13	Baz1a	chr12	-	54927563	54927713	54927563	54927624	54929526	54929665	1076	190168	0,1	122169	17,8	188	99	1.11853e-08	1.67773e-06	1.0,0.989	0.791,0.918	0.14
4136	ENSMUSG00000005506.16	Celf1	chr2	+	91013490	91019490	91016565	91019490	91013237	91013402	4136	175172	182135	143139	235276	198	99	2.83171e-06	0.000222649	0.325,0.389	0.233,0.201	0.14
9275	ENSMUSG00000045975.8	C2cd2	chr16	-	97886087	97886210	97886087	97886207	97890013	97890118	9275	7,4	0,0	20,25	5,2	102	99	0.00105583	0.0280188	1.0,1.0	0.795,0.924	0.14
15169	ENSMUSG00000050705.15	2310061I04Rik	chr17	-	35894918	35895119	35894918	35895052	35895283	35895372	15169	62,53	0,0	27,38	4,2	166	99	0.00107222	0.028386	1.0,1.0	0.801,0.919	0.14
19472	ENSMUSG00000028991.15	Mtor	chr4	+	148465890	148466096	148465997	148466096	148464946	148465162	19472	46,44	0,0	61,51	8,2	198	99	7.18406e-05	0.00339037	1.0,1.0	0.792,0.927	0.14
29134	ENSMUSG00000024160.16	Spsb3	chr17	+	24891028	24891136	24891063	24891136	24890832	24890935	29134	12,12	0,0	32,23	5,2	134	99	0.000918869	0.0252734	1.0,1.0	0.825,0.895	0.14
38038	ENSMUSG00000023707.13	Ogfod2	chr5	+	124113966	124114462	124114406	124114462	124113428	124113528	38038	49,43	0,0	79,52	4,6	198	99	0.000109342	0.00477063	1.0,1.0	0.908,0.812	0.14
1751	ENSMUSG00000029145.12	Eif2b4	chr5	-	31192581	31192770	31192581	31192625	31192992	31193139	1751	77,74	114,85	70,77	220244	198	99	5.42866e-07	5.33315e-05	0.252,0.303	0.137,0.136	0.141
9487	ENSMUSG00000022641.15	Bbx	chr16	-	50274546	50274789	50274546	50274675	50280368	50280539	9487	250176	4,7	68,77	6,12	198	99	0.000127678	0.00537083	0.969,0.926	0.85,0.762	0.141
7034	ENSMUSG00000035342.14	Lzts2	chr19	+	45021386	45021836	45021605	45021836	45018211	45018230	7034	261244	4,3	164153	15,17	198	99	4.9588e-08	6.39656e-06	0.97,0.976	0.845,0.818	0.142
14280	ENSMUSG00000025155.15	Dus1l	chr11	-	120793833	120794295	120793833	120793946	120794902	120795011	14280	14,8	0,1	76,57	11,10	198	99	0.00163277	0.0392138	1.0,0.8	0.776,0.74	0.142
22874	ENSMUSG00000114053.1	Gm35330	chr13	-	5702479	5702592	5702479	5702588	5703417	5703510	22874	3,1	0,0	25,19	4,3	103	99	0.00214028	0.0480327	1.0,1.0	0.857,0.859	0.142
24667	ENSMUSG00000027284.16	Cdan1	chr2	-	120729941	120730344	120729941	120730099	120730468	120730502	24667	14,15	0,0	51,30	2,4	198	99	0.00165227	0.0395136	1.0,1.0	0.927,0.789	0.142
11225	ENSMUSG00000013236.17	Ptprs	chr17	-	56426386	56426653	56426386	56426455	56427938	56428132	11225	107,91	0,0	47,49	4,4	198	99	5.33562e-05	0.00265309	1.0,1.0	0.855,0.86	0.143
20241	ENSMUSG00000000600.15	Krit1	chr5	+	3806418	3806568	3806440	3806568	3803404	3803483	20241	15,19	0,0	58,73	7,11	121	99	8.01102e-05	0.00372534	1.0,1.0	0.871,0.844	0.143
30393	ENSMUSG00000026941.16	Mamdc4	chr2	-	25574187	25574449	25574187	25574417	25574682	25574845	30393	56,44	0,0	22,13	4,1	131	99	0.00196419	0.0449421	1.0,1.0	0.806,0.908	0.143
4133	ENSMUSG00000005506.16	Celf1	chr2	+	91006619	91006695	91006631	91006695	91004700	91004862	4133	369339	38,21	353336	69115	111	99	5.90455e-09	9.56084e-07	0.896,0.935	0.82,0.723	0.144
27517	ENSMUSG00000044037.15	Als2cl	chr9	+	110883854	110884146	110884014	110884146	110882713	110882823	27517	19,21	37,35	24,18	151115	198	99	8.71466e-06	0.000580582	0.204,0.231	0.074,0.073	0.144
37357	ENSMUSG00000108815.1	Gm49388	chr7	+	127801471	127801942	127801833	127801942	127801126	127801246	37357	24,11	0,0	81,84	6,8	198	99	0.000246402	0.00910765	1.0,1.0	0.871,0.84	0.145
37358	ENSMUSG00000108815.1	Gm49388	chr7	+	127801553	127801942	127801833	127801942	127801126	127801246	37358	24,11	0,0	80,84	6,8	198	99	0.000243052	0.00902131	1.0,1.0	0.87,0.84	0.145
256	ENSMUSG00000024073.16	Birc6	chr17	+	74613376	74613596	74613394	74613596	74611998	74612345	256	142122	6,5	119,96	17,26	117	99	1.97196e-06	0.000162816	0.952,0.954	0.856,0.758	0.146
22653	ENSMUSG00000035521.13	Gnptg	chr17	-	25234316	25234722	25234316	25234690	25234807	25234889	22653	85,75	10,13	181194	67,59	131	99	0.000443235	0.0144508	0.865,0.813	0.671,0.713	0.147
37574	ENSMUSG00000029524.16	Sirt4	chr5	-	115479601	115479812	115479601	115479795	115480230	115480525	37574	9,6	0,0	64,57	11,7	116	99	0.000326065	0.0113455	1.0,1.0	0.832,0.874	0.147
38346	ENSMUSG00000026207.16	Speg	chr1	+	75404886	75405147	75404930	75405147	75402297	75402473	38346	14,19	0,0	31,18	4,2	143	99	0.00167387	0.0398823	1.0,1.0	0.843,0.862	0.147
40038	ENSMUSG00000101678.3	Gm29609	chr5	-	31145239	31145565	31145239	31145278	31145683	31145776	40038	13,9	0,0	61,57	9,2	198	99	0.000531673	0.0166862	1.0,1.0	0.772,0.934	0.147
32767	ENSMUSG00000070858.12	Gm1673	chr5	+	33983756	33984153	33984051	33984153	33983469	33983639	32767	123104	11,9	274231	56,51	198	99	0.00039556	0.0131764	0.848,0.852	0.71,0.694	0.148
33595	ENSMUSG00000001750.16	Tcirg1	chr19	-	3898547	3898757	3898547	3898638	3898979	3899119	33595	5,5	0,0	36,23	5,1	198	99	0.000593132	0.0180548	1.0,1.0	0.783,0.92	0.148
36809	ENSMUSG00000039476.13	Prrx2	chr2	+	30879357	30879670	30879455	30879670	30878409	30878591	36809	4,8	17,17	0,0	1,2	197	99	0.00095141	0.0259599	0.106,0.191	0.0,0.0	0.148
20518	ENSMUSG00000041684.11	Bivm	chr1	+	44126241	44126407	44126365	44126407	44120173	44120274	20518	23,20	1,0	45,73	7,6	198	99	0.00100355	0.0269368	0.92,1.0	0.763,0.859	0.149
21378	ENSMUSG00000037487.7	Ubr5	chr15	-	38009118	38009423	38009118	38009163	38009625	38009777	21378	253299	4,12	101,71	9,12	198	99	0.000100253	0.0044571	0.969,0.926	0.849,0.747	0.149
595	ENSMUSG00000022387.17	Brd1	chr15	-	88700772	88701270	88700772	88700877	88707033	88707294	595	245208	19,14	147113	29,21	198	99	0.000122464	0.00521034	0.866,0.881	0.717,0.729	0.15
44325	ENSMUSG00000014873.15	Surf2	chr2	+	26919695	26919835	26919732	26919835	26919191	26919358	44325	17,14	1,0	28,47	6,6	136	99	0.000966171	0.0262303	0.925,1.0	0.773,0.851	0.15
3774	ENSMUSG00000023079.14	Gtf2ird1	chr5	-	134366835	134366916	134366835	134366895	134376106	134376135	3774	33,54	0,2	41,53	8,8	120	99	9.72889e-05	0.00433398	1.0,0.957	0.809,0.845	0.151
4961	ENSMUSG00000063870.12	Chd4	chr6	+	125102431	125102610	125102470	125102610	125102162	125102298	4961	660570	138130	337324	151146	138	99	2.04855e-07	2.29062e-05	0.774,0.759	0.616,0.614	0.151
32071	ENSMUSG00000063884.6	Ptcd3	chr6	-	71894820	71895013	71894820	71894881	71895617	71895693	32071	14,13	1,0	45,49	5,8	198	99	0.00176125	0.0413401	0.875,1.0	0.818,0.754	0.151
35115	ENSMUSG00000025237.16	Parp6	chr9	+	59649472	59649532	59649518	59649532	59649289	59649353	35115	48,44	98109	9,7	61,62	145	99	7.54087e-06	0.000510793	0.251,0.216	0.092,0.072	0.151
22765	ENSMUSG00000026641.13	Usf1	chr1	+	171414372	171414529	171414436	171414529	171411312	171411648	22765	151135	7,2	99,80	9,18	163	99	5.46123e-05	0.00270949	0.929,0.976	0.87,0.73	0.152
38884	ENSMUSG00000029640.17	Usp12	chr5	-	146751892	146752301	146751892	146751969	146754369	146754599	38884	34,29	74,76	18,8	283344	198	99	0	0	0.187,0.16	0.031,0.011	0.152
7637	ENSMUSG00000024851.14	Pitpnm1	chr19	+	4110736	4110990	4110947	4110990	4110494	4110659	7637	207171	1,2	182172	18,18	198	99	1.14454e-09	2.1955e-07	0.99,0.977	0.835,0.827	0.153
11224	ENSMUSG00000013236.17	Ptprs	chr17	-	56426386	56426563	56426386	56426455	56427938	56428132	11224	107,91	0,0	45,44	4,4	198	99	3.63306e-05	0.00190888	1.0,1.0	0.849,0.846	0.153
28981	ENSMUSG00000041459.15	Tardbp	chr4	-	148617553	148617677	148617553	148617635	148618664	148618791	28981	121,83	4,1	427401	60,71	141	99	3.10946e-08	4.25785e-06	0.955,0.983	0.833,0.799	0.153
3983	ENSMUSG00000022995.16	Enah	chr1	-	181921657	181922500	181921657	181921768	181923559	181923840	3983	167135	217194	57,47	180234	198	99	5.46444e-11	1.42213e-08	0.278,0.258	0.137,0.091	0.154
20440	ENSMUSG00000038712.16	Mindy1	chr3	+	95295299	95295425	95295302	95295425	95294794	95294986	20440	16,14	0,0	27,16	3,4	102	99	0.000482782	0.0154459	1.0,1.0	0.897,0.795	0.154
32072	ENSMUSG00000063884.6	Ptcd3	chr6	-	71894820	71895038	71894820	71894881	71895617	71895693	32072	13,13	1,0	46,45	5,8	198	99	0.00163048	0.039201	0.867,1.0	0.821,0.738	0.154
3170	ENSMUSG00000036948.17	Map11	chr5	-	138260834	138261716	138260834	138260989	138261801	138261884	3170	41,17	1,0	110110	11,13	198	99	0.000183779	0.00723773	0.953,1.0	0.833,0.809	0.155
4827	ENSMUSG00000035125.10	Gcfc2	chr6	+	81944320	81944520	81944406	81944520	81943428	81943541	4827	57,50	3,1	88125	13,19	185	99	0.000675851	0.019932	0.91,0.964	0.784,0.779	0.155
24826	ENSMUSG00000040390.13	Map3k10	chr7	-	27663224	27663600	27663224	27663471	27664397	27664573	24826	8,3	16,12	0,0	20,27	198	99	5.82772e-06	0.000409717	0.2,0.111	0.0,0.0	0.155
2147	ENSMUSG00000028453.10	Fancg	chr4	-	43004743	43005033	43004743	43005008	43005210	43005277	2147	12,17	0,0	25,49	5,5	124	99	0.000266605	0.0096776	1.0,1.0	0.8,0.887	0.156
35619	ENSMUSG00000045302.13	Preb	chr5	-	30955929	30956358	30955929	30956261	30957887	30958087	35619	5,3	0,0	49,30	6,2	196	99	0.000738309	0.0212691	1.0,1.0	0.805,0.883	0.156
6317	ENSMUSG00000037370.13	Enpp1	chr10	-	24664554	24664627	24664554	24664601	24664910	24664976	6317	50,49	0,0	23,34	7,1	125	99	0.000114228	0.00492428	1.0,1.0	0.722,0.964	0.157
11553	ENSMUSG00000114942.1	Gm49361	chr14	-	57643081	57643489	57643081	57643223	57648418	57648524	11553	45,35	35,31	56,49	98,89	198	99	0.000808641	0.0228634	0.391,0.361	0.222,0.216	0.157
4279	ENSMUSG00000028522.16	Mier1	chr4	+	103118238	103118315	103118280	103118315	103115559	103115660	4279	9,3	0,0	40,61	6,7	141	99	0.000536841	0.0168247	1.0,1.0	0.824,0.86	0.158
5883	ENSMUSG00000031667.16	Aktip	chr8	-	91129599	91129843	91129599	91129805	91131040	91131152	5883	43,51	165146	8,11	295294	137	99	0	0	0.158,0.202	0.019,0.026	0.158
46028	ENSMUSG00000025404.15	R3hdm2	chr10	+	127492568	127492724	127492630	127492724	127487774	127487875	46028	96,59	0,0	21,18	6,0	161	99	0.000621854	0.0186989	1.0,1.0	0.683,1.0	0.158
17306	ENSMUSG00000021024.14	Psma6	chr12	+	55418205	55418310	55418307	55418310	55414403	55414498	17306	4,7	0,0	40,30	5,2	198	99	0.000590356	0.0179973	1.0,1.0	0.8,0.882	0.159
28110	ENSMUSG00000039046.15	Usp6nl	chr2	+	6400074	6400319	6400279	6400319	6394472	6394555	28110	14,17	29,33	6,3	49,65	198	99	9.44983e-07	8.56509e-05	0.194,0.205	0.058,0.023	0.159
33542	ENSMUSG00000026857.9	Ntmt1	chr2	+	30820448	30820616	30820452	30820616	30819628	30819768	33542	15,12	1,0	81,79	24,13	103	99	0.000170824	0.00683034	0.935,1.0	0.764,0.854	0.159
3575	ENSMUSG00000030281.16	Il17rc	chr6	+	113476398	113476538	113476425	113476538	113474552	113474597	3575	15,19	0,0	20,24	2,5	126	99	0.000239301	0.00893424	1.0,1.0	0.887,0.79	0.161
3902	ENSMUSG00000024727.9	Trpm6	chr19	+	18825750	18825879	18825790	18825879	18823332	18823479	3902	15,19	0,0	60,57	9,7	139	99	7.01885e-05	0.00333718	1.0,1.0	0.826,0.853	0.161
2546	ENSMUSG00000005078.16	Jkamp	chr12	+	72089314	72089406	72089332	72089406	72085856	72086183	2546	160132	8,20	629588	178196	117	99	1.35979e-07	1.60516e-05	0.944,0.848	0.749,0.717	0.163
35389	ENSMUSG00000040272.14	Accs	chr2	-	93841864	93841962	93841864	93841960	93842918	93842988	35389	4,5	0,0	27,25	6,4	101	99	0.000492884	0.0156677	1.0,1.0	0.815,0.86	0.163
2645	ENSMUSG00000065990.12	Aurkaip1	chr4	+	155831892	155832070	155831982	155832070	155831668	155831766	2645	100,86	72,70	91130	182178	189	99	1.25576e-05	0.000786009	0.421,0.392	0.208,0.277	0.164
13695	ENSMUSG00000060073.9	Psma3	chr12	+	70983318	70983442	70983323	70983442	70978732	70978811	13695	9,7	0,0	36,28	7,5	104	99	0.000234542	0.00885313	1.0,1.0	0.83,0.842	0.164
3657	ENSMUSG00000025507.13	Pidd1	chr7	-	141441172	141441374	141441172	141441316	141441474	141441529	3657	8,3	0,0	64,55	9,6	157	99	0.000471714	0.0152231	1.0,1.0	0.818,0.853	0.165
19038	ENSMUSG00000035351.16	Nup37	chr10	+	88174460	88174933	88174882	88174933	88171994	88172085	19038	24,12	0,0	74,88	8,8	198	99	0.000116684	0.00501069	1.0,1.0	0.822,0.846	0.166
30442	ENSMUSG00000026956.15	Uap1l1	chr2	-	25362662	25362848	25362662	25362828	25363311	25363384	30442	3,2	0,0	18,22	2,5	119	99	0.00069395	0.0203177	1.0,1.0	0.882,0.785	0.166
38486	ENSMUSG00000031065.14	Cdk16	chrX	+	20693906	20694171	20694039	20694171	20693323	20693531	38486	6,10	0,0	20,9	5,0	198	99	0.00152997	0.0374111	1.0,1.0	0.667,1.0	0.166
39821	ENSMUSG00000034807.9	Colgalt1	chr8	+	71623037	71623315	71623208	71623315	71622702	71622830	39821	53,51	1,0	40,66	8,3	198	99	0.000147712	0.00604195	0.964,1.0	0.714,0.917	0.166
41894	ENSMUSG00000056952.13	Tatdn2	chr6	+	113709821	113710205	113710040	113710205	113709459	113709643	41894	185165	237197	99,71	305303	198	99	8.73746e-13	2.94578e-10	0.281,0.295	0.14,0.105	0.166
4344	ENSMUSG00000073888.13	Ccl27a	chr4	-	41771137	41771290	41771137	41771213	41773464	41773524	4344	11,6	0,0	24,15	4,1	176	99	0.00203129	0.0461217	1.0,1.0	0.771,0.894	0.167
5507	ENSMUSG00000029416.17	Slc15a4	chr5	-	127604537	127604706	127604537	127604648	127608771	127609061	5507	720610	49,43	311361	74,79	157	99	2.13429e-12	6.83327e-10	0.903,0.899	0.726,0.742	0.167
17286	ENSMUSG00000005682.9	Pan2	chr10	+	128315486	128315657	128315601	128315657	128315097	128315236	17286	34,47	0,0	42,43	7,2	198	99	6.25292e-05	0.00303461	1.0,1.0	0.75,0.915	0.167
43831	ENSMUSG00000033379.13	Atp6v0b	chr4	-	117886589	117886694	117886589	117886638	117887179	117887287	43831	199178	5,11	402364	93,56	155	99	1.12086e-09	2.15938e-07	0.962,0.912	0.734,0.806	0.167
20907	ENSMUSG00000089847.8	Timm10b	chr7	+	105640999	105641160	105641030	105641160	105640761	105640857	20907	19,10	1,0	36,37	6,8	130	99	0.00048702	0.0155368	0.935,1.0	0.82,0.779	0.168
37244	ENSMUSG00000027569.15	Mrgbp	chr2	+	180584601	180584871	180584796	180584871	180584405	180584487	37244	58,53	28,32	203178	217202	198	99	0.000393788	0.013137	0.509,0.453	0.319,0.306	0.168
8891	ENSMUSG00000073434.12	Wdr90	chr17	-	25859388	25859492	25859388	25859483	25859857	25859925	8891	23,15	0,2	29,23	10,5	108	99	0.000754991	0.02161	1.0,0.873	0.727,0.808	0.169
18922	ENSMUSG00000058729.13	Lin9	chr1	+	180665804	180665940	180665808	180665940	180661476	180661602	18922	7,6	0,0	17,18	5,2	103	99	0.000482769	0.0154459	1.0,1.0	0.766,0.896	0.169
25339	ENSMUSG00000029048.3	Rer1	chr4	-	155083108	155083314	155083108	155083236	155086204	155086382	25339	116109	47,55	62,68	62,55	177	99	0.000555576	0.0172751	0.58,0.526	0.359,0.409	0.169
40040	ENSMUSG00000101678.3	Gm29609	chr5	-	31145239	31145615	31145239	31145278	31145683	31145776	40040	13,9	0,0	49,53	9,2	198	99	0.0003495	0.0120014	1.0,1.0	0.731,0.93	0.169
729	ENSMUSG00000024350.6	Dnajc18	chr18	-	35702411	35702595	35702411	35702505	35703025	35703112	729	34,25	54,27	11,19	54,62	189	99	0.000183027	0.00722096	0.248,0.327	0.096,0.138	0.17
36806	ENSMUSG00000039476.13	Prrx2	chr2	+	30879258	30879670	30879455	30879670	30878409	30878591	36806	8,6	17,17	0,0	1,2	198	99	0.000599416	0.0181963	0.19,0.15	0.0,0.0	0.17
792	ENSMUSG00000022827.14	Rabl3	chr16	+	37563615	37563766	37563668	37563766	37556820	37556950	792	19,15	0,0	19,28	4,2	152	99	0.000588115	0.0179866	1.0,1.0	0.756,0.901	0.171
1421	ENSMUSG00000006169.19	Clint1	chr11	+	45907839	45908044	45907893	45908044	45906180	45906467	1421	271256	369277	92118	283349	153	99	8.13025e-11	2.07943e-08	0.322,0.374	0.174,0.18	0.171
3096	ENSMUSG00000028854.9	Slc9a1	chr4	+	133419924	133419995	133419946	133419995	133419453	133419543	3096	13,17	0,0	25,14	0,6	121	99	0.00187117	0.0432361	1.0,1.0	1.0,0.656	0.172
4139	ENSMUSG00000002105.15	Slc39a13	chr2	-	91065581	91065739	91065581	91065700	91066012	91066126	4139	55,50	59,44	39,31	65,86	138	99	0.000778424	0.0221215	0.401,0.449	0.301,0.205	0.172
36041	ENSMUSG00000027201.16	Myef2	chr2	-	125097976	125098155	125097976	125098150	125098449	125098518	36041	8,8	0,0	14,19	7,0	104	99	0.000979498	0.0264828	1.0,1.0	0.656,1.0	0.172
5953	ENSMUSG00000045078.12	Rnf216	chr5	-	143090119	143090929	143090119	143090758	143092994	143093125	5953	260220	39,31	242238	80,79	198	99	6.09241e-06	0.000426306	0.769,0.78	0.602,0.601	0.173
6019	ENSMUSG00000038895.16	Zfp653	chr9	-	22055992	22056528	22055992	22056092	22057286	22057398	6019	28,19	0,0	58,47	6,5	198	99	8.3059e-05	0.0038384	1.0,1.0	0.829,0.825	0.173
11238	ENSMUSG00000091509.7	Gm17066	chr14	-	105113468	105113527	105113468	105113524	105114119	105114676	11238	7,4	0,0	42,41	10,7	102	99	0.00024494	0.00906868	1.0,1.0	0.803,0.85	0.173
33960	ENSMUSG00000026234.12	Ncl	chr1	-	86356051	86356445	86356051	86356442	86356555	86356741	33960	50,30	2,0	20,27	9,2	102	99	0.000331067	0.0114926	0.96,1.0	0.683,0.929	0.174
16605	ENSMUSG00000020471.11	Pold2	chr11	-	5873026	5873503	5873026	5873500	5873688	5873769	16605	26,11	0,1	10,18	6,1	102	99	0.00146769	0.0361916	1.0,0.914	0.618,0.946	0.175
17720	ENSMUSG00000035370.9	Gm49322	chr10	+	80609212	80609424	80609391	80609424	80608802	80608850	17720	24,11	0,0	35,41	4,4	198	99	0.000255119	0.00935218	1.0,1.0	0.814,0.837	0.175
5576	ENSMUSG00000046897.17	Zfp740	chr15	+	102208235	102208361	102208271	102208361	102207770	102207920	5576	279266	46,46	213224	96,87	135	99	1.10446e-07	1.3312e-05	0.816,0.809	0.619,0.654	0.176
6041	ENSMUSG00000026333.14	Gin1	chr1	+	97782926	97783232	97783193	97783232	97777325	97777519	6041	20,10	0,0	130165	18,13	198	99	9.02693e-05	0.00408673	1.0,1.0	0.783,0.864	0.176
28462	ENSMUSG00000074829.10	2010315B03Rik	chr9	-	124311675	124311857	124311675	124311718	124312559	124312696	28462	3,1	0,0	21,22	0,6	198	99	0.000882797	0.0245184	1.0,1.0	1.0,0.647	0.176
31282	ENSMUSG00000060862.10	Zbtb40	chr4	-	136988547	136988762	136988547	136988706	136991497	136991662	31282	17,9	0,0	15,18	1,4	155	99	0.00164172	0.0394074	1.0,1.0	0.905,0.742	0.176
12433	ENSMUSG00000052485.7	Tmem171	chr13	-	98686234	98686519	98686234	98686516	98688347	98688483	12433	32,17	0,1	115122	26,34	102	99	1.53681e-06	0.000130024	1.0,0.943	0.811,0.777	0.177
14267	ENSMUSG00000048445.6	Ccdc57	chr11	-	120921519	120921934	120921519	120921740	120932715	120932872	14267	30,12	0,0	31,16	5,1	198	99	0.000235776	0.00887711	1.0,1.0	0.756,0.889	0.177
33901	ENSMUSG00000025878.16	Uimc1	chr13	-	55076297	55076453	55076297	55076375	55077402	55077527	33901	22,15	0,0	26,24	8,0	177	99	0.000436424	0.0142496	1.0,1.0	0.645,1.0	0.177
38295	ENSMUSG00000023104.9	Rfc2	chr5	+	134593156	134593283	134593255	134593283	134591118	134591219	38295	11,13	0,0	24,33	3,3	198	99	0.00136376	0.0342695	1.0,1.0	0.8,0.846	0.177
17579	ENSMUSG00000034932.4	Mrpl54	chr10	-	81264712	81264987	81264712	81264909	81265650	81265807	17579	1,3	0,0	16,10	5,0	177	99	0.00178117	0.0417417	1.0,1.0	0.642,1.0	0.179
9019	ENSMUSG00000079641.3	Rpl39	chrX	-	37083984	37084240	37083984	37084132	37085124	37085402	9019	24,16	38,39	4,2	56,59	198	99	1.8862e-09	3.41226e-07	0.24,0.17	0.034,0.017	0.18
32765	ENSMUSG00000070858.12	Gm1673	chr5	+	33983756	33984153	33984051	33984153	33983432	33983564	32765	37,36	0,0	90,76	13,6	198	99	5.66123e-06	0.000399274	1.0,1.0	0.776,0.864	0.18
19937	ENSMUSG00000028798.16	Eif3i	chr4	-	129595126	129595600	129595126	129595449	129596873	129596939	19937	6,7	22,8	3,1	35,25	198	99	0.00070718	0.0205966	0.12,0.304	0.041,0.02	0.181
21661	ENSMUSG00000071379.2	Hpcal1	chr12	+	17787481	17787650	17787517	17787650	17786146	17786548	21661	5,1	12,5	0,0	2,1	135	99	0.000559989	0.0173425	0.234,0.128	0.0,0.0	0.181
23009	ENSMUSG00000054611.17	Kdm2a	chr19	-	4350185	4350345	4350185	4350305	4351736	4351830	23009	74,42	2,2	24,42	8,5	139	99	0.000943791	0.0257678	0.963,0.937	0.681,0.857	0.181
35690	ENSMUSG00000035401.9	Emsy	chr7	-	98639730	98639883	98639730	98639880	98641492	98641668	35690	8,4	0,1	20,21	10,6	102	99	0.000954433	0.0260264	1.0,0.795	0.66,0.773	0.181
5771	ENSMUSG00000036977.8	Anapc10	chr8	+	79713104	79713279	79713152	79713279	79711819	79711844	5771	56,49	14,17	204144	122,99	147	99	0.000926066	0.0253617	0.729,0.66	0.53,0.495	0.182
7577	ENSMUSG00000034108.6	Ccs	chr19	-	4825594	4825664	4825594	4825621	4825943	4826309	7577	8,5	0,0	26,15	0,6	142	99	0.00175032	0.0411923	1.0,1.0	1.0,0.635	0.182
21676	ENSMUSG00000028080.16	Lrba	chr3	+	86741389	86741582	86741404	86741582	86737081	86737171	21676	9,5	21,20	0,2	18,19	114	99	0.000479625	0.0154002	0.271,0.178	0.0,0.084	0.182
5836	ENSMUSG00000023994.13	Nfya	chr17	-	48392339	48392506	48392339	48392488	48393179	48393285	5836	133150	57,54	118118	88114	117	99	1.05443e-05	0.000676156	0.664,0.702	0.532,0.467	0.183
28365	ENSMUSG00000029406.15	Pitpnm2	chr5	-	124129163	124129627	124129163	124129402	124130206	124130326	28365	3,7	16,9	0,0	20,16	198	99	2.98247e-05	0.0016226	0.086,0.28	0.0,0.0	0.183
38292	ENSMUSG00000023104.9	Rfc2	chr5	+	134593139	134593283	134593255	134593283	134591118	134591219	38292	12,13	0,0	24,30	3,3	198	99	0.00114322	0.0300511	1.0,1.0	0.8,0.833	0.183
21420	ENSMUSG00000042354.7	Gnl3	chr14	-	31013652	31014125	31013652	31014120	31014589	31014677	21420	24,30	0,0	83118	21,21	104	99	3.30123e-07	3.44063e-05	1.0,1.0	0.79,0.842	0.184
44523	ENSMUSG00000030655.15	Smg1	chr7	-	118195810	118196035	118195810	118195931	118198190	118198364	44523	153158	2,8	84,78	12,14	198	99	9.73205e-06	0.000637738	0.975,0.908	0.778,0.736	0.184
603	ENSMUSG00000022897.15	Dyrk1a	chr16	+	94663741	94663861	94663768	94663861	94659496	94659693	603	238200	66,45	147131	76,87	126	99	1.32959e-06	0.000115568	0.739,0.777	0.603,0.542	0.185
2341	ENSMUSG00000026641.13	Usf1	chr1	+	171414372	171414529	171414436	171414529	171411312	171411440	2341	313296	452431	211185	1086880	163	99	0	0	0.296,0.294	0.106,0.113	0.185
2441	ENSMUSG00000031851.14	Ntpcr	chr8	+	125745235	125745445	125745239	125745445	125736067	125736230	2441	7,11	0,0	14,16	6,1	103	99	0.000369578	0.012535	1.0,1.0	0.692,0.939	0.185
37977	ENSMUSG00000039345.16	Mettl22	chr16	+	8477966	8478329	8478115	8478329	8473830	8473966	37977	27,31	0,0	66,77	14,3	198	99	3.4822e-05	0.00184486	1.0,1.0	0.702,0.928	0.185
41536	ENSMUSG00000035585.16	Tsen34	chr7	+	3695363	3695621	3695384	3695621	3694931	3695227	41536	74,49	5,3	87115	40,18	120	99	0.000197842	0.00769631	0.924,0.931	0.642,0.841	0.186
25467	ENSMUSG00000041058.15	Wwp1	chr4	-	19672418	19672543	19672418	19672527	19673155	19673294	25467	135,89	7,9	58,66	21,18	115	99	2.09223e-06	0.000171791	0.943,0.895	0.704,0.759	0.188
43786	ENSMUSG00000021140.9	Pcnx	chr12	+	81959993	81960104	81960043	81960104	81958682	81958854	43786	105,70	1,0	21,15	4,2	149	99	0.00017407	0.00692941	0.986,1.0	0.777,0.833	0.188
11989	ENSMUSG00000014496.8	Ankrd28	chr14	-	31707203	31707351	31707203	31707284	31708002	31708148	11989	4,7	0,0	22,20	4,2	166	99	0.000634925	0.0189766	1.0,1.0	0.766,0.856	0.189
32243	ENSMUSG00000040174.14	Alkbh3	chr2	-	94003052	94003182	94003052	94003122	94004732	94005187	32243	28,34	2,0	91,54	13,14	159	99	0.000172785	0.00689637	0.897,1.0	0.813,0.706	0.189
41151	ENSMUSG00000079852.4	Klra4	chr6	-	130063105	130063195	130063105	130063186	130065190	130065354	41151	1,2	0,0	9,3	5,0	108	99	0.00160592	0.0387361	1.0,1.0	0.623,1.0	0.189
3002	ENSMUSG00000033852.16	Gm28042	chr2	+	120031501	120031651	120031574	120031651	120031306	120031402	3002	47,59	53,65	48,46	153151	172	99	1.60011e-07	1.84005e-05	0.338,0.343	0.153,0.149	0.19
807	ENSMUSG00000042323.17	Pbrm1	chr14	+	31025497	31025650	31025500	31025650	31023066	31023179	807	25,21	0,0	17,10	0,6	102	99	0.00151395	0.0370806	1.0,1.0	1.0,0.618	0.191
40982	ENSMUSG00000030346.16	Rad51ap1	chr6	-	126924917	126925119	126924917	126925067	126926358	126926517	40982	25,16	47,40	20,19	293283	151	99	3.84615e-12	1.20539e-09	0.259,0.208	0.043,0.042	0.191
44639	ENSMUSG00000046897.17	Zfp740	chr15	+	102208029	102208361	102208271	102208361	102207770	102207920	44639	77,71	46,46	64,61	96,87	198	99	1.90436e-05	0.0011315	0.456,0.436	0.25,0.26	0.191
4280	ENSMUSG00000028522.16	Mier1	chr4	+	103118241	103118315	103118280	103118315	103115559	103115660	4280	3,2	0,0	33,44	6,7	138	99	0.000541376	0.016931	1.0,1.0	0.798,0.818	0.192
4337	ENSMUSG00000027624.19	Epb41l1	chr2	+	156510735	156510881	156510756	156510881	156509131	156509307	4337	125,98	15,11	130110	51,41	120	99	8.99717e-07	8.18816e-05	0.873,0.88	0.678,0.689	0.193
34231	ENSMUSG00000020328.10	Nudcd2	chr11	+	40736494	40736644	40736567	40736644	40736017	40736066	34231	53,46	14,14	250245	162151	172	99	0.000564812	0.0174312	0.685,0.654	0.47,0.483	0.193
17315	ENSMUSG00000021024.14	Psma6	chr12	+	55418280	55418310	55418307	55418310	55414403	55414498	17315	6,7	0,0	19,16	5,2	126	99	0.000288874	0.0102928	1.0,1.0	0.749,0.863	0.194
36451	ENSMUSG00000033285.15	Wdr3	chr3	-	100152806	100152861	100152806	100152858	100153545	100153647	36451	4,1	0,0	8,11	1,4	102	99	0.00140021	0.034988	1.0,1.0	0.886,0.727	0.194
10685	ENSMUSG00000033762.8	Recql4	chr15	-	76706158	76706338	76706158	76706292	76706416	76706605	10685	20,9	0,0	41,38	6,7	145	99	5.62981e-05	0.00277764	1.0,1.0	0.823,0.788	0.195
13237	ENSMUSG00000021286.8	Zfyve21	chr12	+	111827542	111827685	111827545	111827685	111825578	111825632	13237	4,3	0,0	32,28	6,8	102	99	0.000321524	0.0112226	1.0,1.0	0.838,0.773	0.195
23376	ENSMUSG00000027942.16	4933434E20Rik	chr3	+	90058486	90058651	90058556	90058651	90056528	90056582	23376	6,5	0,0	22,28	5,2	169	99	0.000392494	0.0131036	1.0,1.0	0.72,0.891	0.195
9654	ENSMUSG00000024376.7	Epb41l4a	chr18	-	33880186	33880284	33880186	33880265	33886350	33886429	9654	2,4	0,0	21,14	1,6	118	99	0.000635872	0.0189921	1.0,1.0	0.946,0.662	0.196
26061	ENSMUSG00000018322.10	Tomm34	chr2	-	164066569	164066757	164066569	164066669	164070466	164071102	26061	1,5	4,7	0,0	13,13	187	99	0.000267915	0.00971118	0.117,0.274	0.0,0.0	0.196
1348	ENSMUSG00000018570.17	2810408A11Rik	chr11	-	69899705	69899926	69899705	69899810	69900302	69900957	1348	38,39	19,15	59,58	62,54	198	99	0.00174975	0.0411923	0.5,0.565	0.322,0.349	0.197
17301	ENSMUSG00000021024.14	Psma6	chr12	+	55418202	55418310	55418307	55418310	55414403	55414498	17301	2,7	0,0	33,21	5,2	198	99	0.000291628	0.0103827	1.0,1.0	0.767,0.84	0.197
42193	ENSMUSG00000054342.8	Kcnn4	chr7	+	24384545	24384759	24384721	24384759	24384113	24384182	42193	44,58	64,54	53,73	225305	198	99	1.0047e-09	1.96305e-07	0.256,0.349	0.105,0.107	0.197
48703	ENSMUSG00000079523.8	Tmsb10	chr6	-	72957906	72958247	72957906	72958022	72958336	72958488	48703	11,13	23,26	0,0	48,36	198	99	1.03514e-10	2.53114e-08	0.193,0.2	0.0,0.0	0.197
37541	ENSMUSG00000020220.16	Vps13d	chr4	-	145086703	145086830	145086703	145086811	145087124	145087316	37541	13,29	1,0	15,19	4,5	118	99	0.000142859	0.00589766	0.916,1.0	0.759,0.761	0.198
5129	ENSMUSG00000069601.14	Ank3	chr10	+	70001922	70002601	70002510	70002601	69999354	69999498	5129	91,71	12,14	82,89	30,39	198	99	0.000472884	0.0152498	0.791,0.717	0.577,0.533	0.199
2581	ENSMUSG00000027684.16	Mecom	chr3	-	29979600	29980957	29979600	29979985	29985340	29985494	2581	32,39	2,1	42,64	10,10	198	99	0.0014491	0.0359273	0.889,0.951	0.677,0.762	0.2
6140	ENSMUSG00000032340.8	Neo1	chr9	-	58930955	58931175	58930955	58931115	58955958	58956079	6140	715600	52,63	215218	51,83	159	99	1.23072e-10	2.94927e-08	0.895,0.856	0.724,0.621	0.203
30740	ENSMUSG00000009995.17	Taz	chrX	+	74288303	74288513	74288447	74288513	74288177	74288219	30740	14,18	0,0	163149	21,19	198	99	2.84373e-05	0.00155855	1.0,1.0	0.795,0.797	0.204
34032	ENSMUSG00000039623.13	Ap5z1	chr5	+	142470393	142470556	142470438	142470556	142470289	142470327	34032	12,3	0,0	31,31	6,5	144	99	0.000168536	0.00676316	1.0,1.0	0.78,0.81	0.205
12199	ENSMUSG00000021774.13	Ube2e1	chr14	-	18330863	18331075	18330863	18331041	18331686	18331859	12199	13,8	0,0	46,55	18,3	133	99	0.000110932	0.00483052	1.0,1.0	0.655,0.932	0.206
28273	ENSMUSG00000041718.15	Alg13	chrX	+	144336111	144336463	144336332	144336463	144322011	144322150	28273	14,14	0,0	14,25	1,5	198	99	0.000107562	0.00471366	1.0,1.0	0.875,0.714	0.206
32076	ENSMUSG00000063884.6	Ptcd3	chr6	-	71894820	71895038	71894820	71895013	71895904	71895992	32076	8,12	20,21	2,3	37,21	124	99	0.000177321	0.00703325	0.242,0.313	0.041,0.102	0.206
47154	ENSMUSG00000031982.5	Arv1	chr8	+	124730791	124731016	124730838	124731016	124728306	124728482	47154	37,31	2,2	93,80	33,16	146	99	0.00019699	0.00767556	0.926,0.913	0.656,0.772	0.206
17288	ENSMUSG00000005682.9	Pan2	chr10	+	128315491	128315657	128315601	128315657	128315097	128315236	17288	26,40	0,0	31,35	7,2	198	99	3.68859e-05	0.00193577	1.0,1.0	0.689,0.897	0.207
38950	ENSMUSG00000041264.16	Uspl1	chr5	+	149193894	149193912	149193897	149193912	149188344	149188473	38950	11,11	0,2	24,34	13,9	102	99	0.00225105	0.0499142	1.0,0.842	0.642,0.786	0.207
44138	ENSMUSG00000021771.14	Vdac2	chr14	+	21831577	21831896	21831850	21831896	21831270	21831444	44138	40,34	14,12	51,41	47,30	198	99	0.00219572	0.048956	0.588,0.586	0.352,0.406	0.208
48775	ENSMUSG00000028580.15	Pum1	chr4	+	130743677	130743794	130743692	130743794	130741462	130741556	48775	68,45	125114	11,10	134,86	114	99	1.08625e-10	2.64161e-08	0.321,0.255	0.067,0.092	0.209
14260	ENSMUSG00000039307.16	Hexdc	chr11	+	121221307	121221590	121221500	121221590	121221082	121221161	14260	3,3	0,0	19,14	4,1	198	99	0.00076175	0.0217727	1.0,1.0	0.704,0.875	0.211
35771	ENSMUSG00000032579.14	Hemk1	chr9	-	107330704	107331155	107330704	107330822	107331444	107331579	35771	8,1	0,0	25,24	5,2	198	99	0.000237437	0.0088945	1.0,1.0	0.714,0.857	0.215
48974	ENSMUSG00000032582.14	Rbm6	chr9	-	107853270	107853562	107853270	107853540	107860348	107860459	48974	1,4	5,8	0,0	4,3	121	99	0.00104549	0.0278928	0.141,0.29	0.0,0.0	0.215
1021	ENSMUSG00000012609.19	Ttll5	chr12	+	85939325	85939510	85939328	85939510	85933281	85933674	1021	21,14	0,0	18,19	2,9	102	99	2.12299e-05	0.00123755	1.0,1.0	0.897,0.672	0.216
14259	ENSMUSG00000039307.16	Hexdc	chr11	+	121221292	121221590	121221500	121221590	121221082	121221161	14259	3,3	0,0	17,16	4,1	198	99	0.000744926	0.0213829	1.0,1.0	0.68,0.889	0.216
42012	ENSMUSG00000027667.13	Zfp639	chr3	+	32513008	32513192	32513039	32513192	32510663	32510732	42012	3,3	0,0	23,16	2,6	130	99	0.000263409	0.00959655	1.0,1.0	0.898,0.67	0.216
18590	ENSMUSG00000006050.12	Sra1	chr18	-	36667428	36667911	36667428	36667659	36668651	36668848	18590	29,25	1,0	67,52	12,8	198	99	3.16748e-05	0.00170656	0.935,1.0	0.736,0.765	0.217
44008	ENSMUSG00000070426.12	Rnf121	chr7	-	102023311	102023500	102023311	102023390	102029011	102029132	44008	19,18	0,1	83,64	19,9	198	99	9.60392e-05	0.00429745	1.0,0.9	0.686,0.78	0.217
1186	ENSMUSG00000020747.17	Tmem94	chr11	+	115790966	115791176	115791032	115791176	115790169	115790334	1186	233146	10,20	101,96	37,26	165	99	5.02135e-07	4.96589e-05	0.933,0.814	0.621,0.689	0.218
35128	ENSMUSG00000037999.13	Arap2	chr5	-	62669026	62669225	62669026	62669191	62669879	62669982	35128	11,2	0,0	14,10	3,2	133	99	0.00162739	0.0391692	1.0,1.0	0.776,0.788	0.218
18589	ENSMUSG00000006050.12	Sra1	chr18	-	36667428	36667815	36667428	36667659	36668651	36668848	18589	30,24	1,0	67,52	12,8	198	99	3.14243e-05	0.00169718	0.938,1.0	0.736,0.765	0.219
27461	ENSMUSG00000063897.3	CAAA01118383.1	chrGL456216.1	+	34646	34831	34690	34831	34137	34345	27461	4,1	6,5	0,0	13,5	143	99	0.00107491	0.0284405	0.316,0.122	0.0,0.0	0.219
22180	ENSMUSG00000067931.6	Zfp948	chr17	+	21569015	21569127	21569048	21569127	21567007	21567245	22180	34,24	28,34	31,33	104,99	132	99	0.000122266	0.00520689	0.477,0.346	0.183,0.2	0.22
35807	ENSMUSG00000044700.15	Tmem201	chr4	-	149718650	149718944	149718650	149718890	149719511	149719583	35807	50,56	1,4	25,33	6,9	153	99	0.000392273	0.0131036	0.97,0.901	0.729,0.703	0.22
3903	ENSMUSG00000023991.16	Foxp4	chr17	-	47875519	47875724	47875519	47875688	47875839	47875923	3903	24,28	55,23	9,15	70,48	135	99	0.00128964	0.0326839	0.242,0.472	0.086,0.186	0.221
30171	ENSMUSG00000097743.1	Gm16973	chr14	-	56699148	56699374	56699148	56699306	56700819	56701268	30171	37,35	1,1	32,35	13,3	167	99	0.000382031	0.0128414	0.956,0.954	0.593,0.874	0.221
44115	ENSMUSG00000029416.17	Slc15a4	chr5	-	127604537	127604701	127604537	127604648	127608771	127609061	44115	241209	49,43	140135	74,79	152	99	2.4417e-08	3.40636e-06	0.762,0.76	0.552,0.527	0.221
9698	ENSMUSG00000022843.17	Clcn2	chr16	-	20712056	20712182	20712056	20712136	20712311	20712787	9698	44,32	0,0	111107	16,27	145	99	2.70649e-08	3.75224e-06	1.0,1.0	0.826,0.73	0.222
24900	ENSMUSG00000029312.12	Klhl8	chr5	-	103885906	103886290	103885906	103886287	103911115	103911259	24900	2,1	0,0	21,11	6,3	102	99	0.000380026	0.0128124	1.0,1.0	0.773,0.781	0.223
42925	ENSMUSG00000101166.6	Gm28496	chr7	+	44247909	44248295	44248251	44248295	44247250	44247416	42925	47,35	8,7	172150	66,92	198	99	0.00119719	0.0308503	0.746,0.714	0.566,0.449	0.223
37881	ENSMUSG00000044134.9	Pheta1	chr5	+	121852530	121852884	121852557	121852884	121851167	121851279	37881	9,2	0,1	10,11	7,5	126	99	0.000961018	0.0261579	1.0,0.611	0.529,0.634	0.224
4507	ENSMUSG00000022536.14	Glyr1	chr16	-	5021337	5021448	5021337	5021430	5026507	5026607	4507	114,84	16,11	368374	169189	117	99	3.19602e-09	5.53434e-07	0.858,0.866	0.648,0.626	0.225
44566	ENSMUSG00000030880.14	Polr3e	chr7	+	120931248	120931310	120931263	120931310	120930878	120930986	44566	3,4	1,0	20,27	13,10	114	99	0.00175361	0.0412478	0.723,1.0	0.572,0.701	0.225
11549	ENSMUSG00000114942.1	Gm49361	chr14	-	57642076	57642160	57642076	57642086	57643081	57643223	11549	11,15	0,0	26,11	1,4	173	99	0.00160234	0.0386709	1.0,1.0	0.937,0.611	0.226
14257	ENSMUSG00000039307.16	Hexdc	chr11	+	121221262	121221590	121221500	121221590	121221082	121221161	14257	2,2	0,0	16,15	4,1	198	99	0.000614446	0.0185137	1.0,1.0	0.667,0.882	0.226
26307	ENSMUSG00000049957.14	Ccdc137	chr11	+	120459953	120460220	120460041	120460220	120459709	120459855	26307	7,3	0,0	61,39	8,7	187	99	0.000245502	0.00908194	1.0,1.0	0.801,0.747	0.226
39209	ENSMUSG00000009741.15	Ubp1	chr9	+	113931507	113931766	113931576	113931766	113930933	113931219	39209	8,7	1,0	27,16	10,3	168	99	0.000997601	0.0268093	0.825,1.0	0.614,0.759	0.226
6156	ENSMUSG00000032217.13	Rnf111	chr9	-	70429551	70429679	70429551	70429655	70430930	70431026	6156	47,34	24,28	28,22	44,39	123	99	0.000915478	0.0251957	0.612,0.494	0.339,0.312	0.227
35285	ENSMUSG00000025858.12	Get4	chr5	+	139265609	139265765	139265669	139265765	139263478	139263628	35285	13,10	0,0	48,22	4,7	159	99	0.000117643	0.00503409	1.0,1.0	0.882,0.662	0.228
35999	ENSMUSG00000030763.7	Lcmt1	chr7	+	123422390	123422756	123422709	123422756	123421537	123421639	35999	16,9	0,0	16,26	3,3	198	99	0.000331957	0.0115145	1.0,1.0	0.727,0.812	0.23
13813	ENSMUSG00000041297.8	Cdk13	chr13	-	17719355	17719796	17719355	17719625	17721087	17721293	13813	80,76	41,29	77,80	72121	198	99	9.07355e-06	0.000602687	0.494,0.567	0.348,0.248	0.232
16638	ENSMUSG00000083844.8	Ube2d-ps	chr11	+	5768885	5769072	5768888	5769072	5765508	5765571	16638	1,7	0,0	10,7	3,2	102	99	0.00158075	0.038295	1.0,1.0	0.764,0.773	0.232
1127	ENSMUSG00000020594.14	Pum2	chr12	+	8719002	8719113	8719005	8719113	8713843	8713937	1127	29,28	6,6	47,46	41,24	102	99	0.000671824	0.0198659	0.824,0.819	0.527,0.65	0.233
770	ENSMUSG00000004562.16	Arhgef40	chr14	+	52004878	52005035	52004988	52005035	52004611	52004742	770	78,74	39,37	92,82	114126	198	99	2.25726e-07	2.47024e-05	0.5,0.5	0.287,0.246	0.234
9364	ENSMUSG00000022960.13	Donson	chr16	-	91686166	91686368	91686166	91686249	91687794	91687875	9364	9,5	0,0	25,41	4,6	198	99	0.000168533	0.00676316	1.0,1.0	0.758,0.774	0.234
3366	ENSMUSG00000031862.11	Atp13a1	chr8	+	69799761	69799937	69799831	69799937	69799320	69799478	3366	392345	10,10	422427	105,88	169	99	0	0	0.958,0.953	0.702,0.74	0.235
34538	ENSMUSG00000053453.9	Thoc7	chr14	-	13957061	13957535	13957061	13957180	13961184	13961277	34538	4,9	1,0	44,14	7,9	198	99	0.00198072	0.0452828	0.667,1.0	0.759,0.438	0.235
377	ENSMUSG00000025735.13	Rhbdl1	chr17	-	25835276	25835377	25835276	25835353	25835469	25835582	377	3,7	0,0	31,24	9,5	123	99	0.000114135	0.00492428	1.0,1.0	0.735,0.794	0.236
1656	ENSMUSG00000029279.15	Brdt	chr5	+	107370154	107370329	107370157	107370329	107369302	107369364	1656	3,6	0,0	10,10	3,3	102	99	0.000607941	0.0183549	1.0,1.0	0.764,0.764	0.236
20601	ENSMUSG00000041203.9	Trir	chr8	+	85029422	85029616	85029518	85029616	85026822	85027234	20601	79115	2,2	12,17	1,6	195	99	0.00110223	0.0291114	0.953,0.967	0.859,0.59	0.236
6462	ENSMUSG00000041115.16	Iqsec2	chrX	+	152180996	152181092	152181042	152181092	152178963	152179090	6462	1,5	0,0	6,8	0,5	145	99	0.00179133	0.0419073	1.0,1.0	1.0,0.522	0.239
23504	ENSMUSG00000004896.16	Rrnad1	chr3	-	87927562	87927715	87927562	87927660	87927923	87928258	23504	2,7	0,0	22,28	5,5	154	99	0.000197136	0.00767556	1.0,1.0	0.739,0.783	0.239
14698	ENSMUSG00000020691.13	Mettl2	chr11	+	105128740	105129075	105128855	105129075	105126478	105127441	14698	20,14	0,0	25,25	5,3	198	99	5.54871e-05	0.00274372	1.0,1.0	0.714,0.806	0.24
29285	ENSMUSG00000026584.14	Scyl3	chr1	+	163945883	163946348	163946202	163946348	163944795	163944935	29285	1,5	0,0	24,20	4,3	198	99	0.000229149	0.0087012	1.0,1.0	0.75,0.769	0.24
1323	ENSMUSG00000040447.15	Spns2	chr11	-	72453553	72453714	72453553	72453600	72454053	72454217	1323	4,11	6,10	1,1	9,7	198	99	0.000536782	0.0168247	0.25,0.355	0.053,0.067	0.242
6139	ENSMUSG00000032340.8	Neo1	chr9	-	58906870	58907094	58906870	58907046	58908403	58908499	6139	145134	201209	8,20	120119	147	99	0	0	0.327,0.302	0.043,0.102	0.242
2161	ENSMUSG00000021417.15	Eci2	chr13	-	34993067	34993328	34993067	34993220	34994013	34994132	2161	306208	37,37	244295	108133	198	99	9.1808e-11	2.27483e-08	0.805,0.738	0.53,0.526	0.244
33346	ENSMUSG00000015790.16	Surf1	chr2	-	26913576	26914001	26913576	26913658	26914706	26914895	33346	4,1	0,0	27,18	6,2	198	99	0.000111882	0.00486714	1.0,1.0	0.692,0.818	0.245
4634	ENSMUSG00000029625.16	Cpsf4	chr5	+	145178757	145178928	145178835	145178928	145177229	145177302	4634	112114	47,44	142128	162138	177	99	9.6432e-09	1.4697e-06	0.571,0.592	0.329,0.342	0.246
12654	ENSMUSG00000024330.17	Col11a2	chr17	+	34052648	34052985	34052940	34052985	34052463	34052517	12654	5,2	4,5	0,1	15,8	198	99	0.000205419	0.00793556	0.385,0.167	0.0,0.059	0.247
21014	ENSMUSG00000040722.7	Scamp5	chr9	-	57445811	57446173	57445811	57446168	57451355	57451484	21014	1,6	0,0	17,5	4,2	104	99	0.00039818	0.0132438	1.0,1.0	0.802,0.704	0.247
27165	ENSMUSG00000042831.13	Alkbh6	chr7	+	30312505	30312707	30312563	30312707	30312236	30312388	27165	49,37	0,1	12,19	3,4	157	99	5.98598e-05	0.00292292	1.0,0.959	0.716,0.75	0.247
6294	ENSMUSG00000046603.16	Tcaim	chr9	+	122818773	122819026	122818849	122819026	122814431	122814588	6294	48,54	2,1	37,63	11,12	175	99	1.20821e-05	0.000765939	0.931,0.968	0.656,0.748	0.248
10480	ENSMUSG00000024769.7	Cdc42bpg	chr19	+	6309273	6309382	6309298	6309382	6309125	6309217	10480	2,4	7,7	0,0	12,11	124	99	0.000123114	0.005233	0.186,0.313	0.0,0.0	0.249
31673	ENSMUSG00000015659.12	Serac1	chr17	-	6051689	6051831	6051689	6051781	6056606	6056757	31673	13,10	0,1	9,18	3,5	149	99	0.000550377	0.0171715	1.0,0.869	0.666,0.705	0.249
10691	ENSMUSG00000004187.11	Kifc2	chr15	+	76662100	76662229	76662110	76662229	76661945	76662011	10691	2,1	0,0	10,13	3,4	109	99	0.000259683	0.00948823	1.0,1.0	0.752,0.747	0.25
32952	ENSMUSG00000036617.16	Etl4	chr2	+	20797876	20798031	20797879	20798031	20788427	20788611	32952	4,3	0,0	10,15	6,2	102	99	0.000136084	0.00564959	1.0,1.0	0.618,0.879	0.252
4526	ENSMUSG00000023707.13	Ogfod2	chr5	+	124114064	124114645	124114387	124114645	124113428	124113528	4526	149145	9,9	174130	40,45	198	99	1.6591e-08	2.39724e-06	0.892,0.89	0.685,0.591	0.253
19982	ENSMUSG00000061894.15	Zscan20	chr4	-	128588015	128588444	128588015	128588441	128589451	128590141	19982	7,5	0,1	3,14	2,5	102	99	0.00205817	0.0465656	1.0,0.829	0.593,0.731	0.253
33395	ENSMUSG00000026837.15	Col5a1	chr2	+	28028966	28029165	28029096	28029165	28025592	28025705	33395	360326	195145	90,88	157113	198	99	2.12275e-13	7.61843e-11	0.48,0.529	0.223,0.28	0.253
43704	ENSMUSG00000038563.14	Efl1	chr7	+	82674367	82674544	82674404	82674544	82672809	82672947	43704	140119	7,5	68,71	18,29	136	99	7.28813e-10	1.48102e-07	0.936,0.945	0.733,0.641	0.253
37556	ENSMUSG00000041341.10	Atg2b	chr12	-	105648988	105649161	105648988	105649088	105649474	105649632	37556	120103	22,7	60,68	34,22	172	99	0.000128029	0.00538023	0.758,0.894	0.504,0.64	0.254
3214	ENSMUSG00000078580.3	E430018J23Rik	chr7	-	127393000	127393114	127393000	127393111	127393289	127393629	3214	4,4	0,0	7,10	1,6	102	99	9.35944e-05	0.00419882	1.0,1.0	0.872,0.618	0.255
28896	ENSMUSG00000019437.17	Tlcd1	chr11	+	78179153	78179452	78179369	78179452	78178761	78179056	28896	15,16	13,11	46,23	110105	198	99	2.50867e-05	0.0014186	0.366,0.421	0.173,0.099	0.257
1593	ENSMUSG00000035478.14	Mbd3	chr10	-	80395063	80395285	80395063	80395201	80395435	80395595	1593	684641	489511	240250	644770	183	99	0	0	0.431,0.404	0.168,0.149	0.259
5923	ENSMUSG00000036270.16	Edc4	chr8	+	105889630	105889729	105889672	105889729	105889103	105889540	5923	77,67	11,12	60,36	38,18	141	99	4.81905e-06	0.000350429	0.831,0.797	0.526,0.584	0.259
12278	ENSMUSG00000021782.14	Dlg5	chr14	-	24148207	24148391	24148207	24148388	24149362	24149512	12278	8,16	1,0	14,5	3,4	102	99	0.000708754	0.0206155	0.886,1.0	0.819,0.548	0.26
12502	ENSMUSG00000069184.4	Zfp72	chr13	-	74376435	74376562	74376435	74376519	74378611	74378866	12502	5,2	0,0	43,38	17,5	142	99	0.000152078	0.00617512	1.0,1.0	0.638,0.841	0.26
16219	ENSMUSG00000020364.14	Zfp354a	chr11	+	51059785	51060041	51059951	51060041	51059293	51059402	16219	3,6	0,0	23,11	0,6	198	99	0.00164812	0.0394548	1.0,1.0	1.0,0.478	0.261
17300	ENSMUSG00000021024.14	Psma6	chr12	+	55418202	55418310	55418283	55418310	55414403	55414498	17300	2,7	1,0	33,21	19,11	180	99	0.00158944	0.0384219	0.524,1.0	0.489,0.512	0.262
35940	ENSMUSG00000033943.15	Mga	chr2	+	119938622	119938751	119938642	119938751	119935451	119935666	35940	1,5	11,4	1,0	14,17	119	99	0.00155427	0.0378515	0.07,0.51	0.056,0.0	0.262
70	ENSMUSG00000054737.11	Zfp182	chrX	-	21060502	21060557	21060502	21060528	21061893	21062003	70	7,2	0,0	23,23	3,11	128	99	0.000100876	0.0044794	1.0,1.0	0.856,0.618	0.263
4460	ENSMUSG00000029516.19	Cit	chr5	+	115846283	115846466	115846346	115846466	115845277	115845323	4460	30,19	1,0	37,12	13,2	162	99	8.03407e-06	0.000540091	0.948,1.0	0.635,0.786	0.263
25528	ENSMUSG00000062729.11	Ppox	chr1	-	171279861	171280271	171279861	171280260	171280387	171280522	25528	2,1	0,0	8,7	0,7	110	99	0.00119822	0.0308589	1.0,1.0	1.0,0.474	0.263
38631	ENSMUSG00000045438.12	Cox19	chr5	-	139339148	139339385	139339148	139339239	139342562	139342674	38631	2,5	0,0	9,3	5,0	198	99	0.00110618	0.0291982	1.0,1.0	0.474,1.0	0.263
1018	ENSMUSG00000079036.10	Alkbh1	chr12	-	87431399	87431593	87431399	87431538	87434118	87434209	1018	225177	6,5	399387	130,94	154	99	0	0	0.96,0.958	0.664,0.726	0.264
47426	ENSMUSG00000031821.11	Gins2	chr8	-	120586092	120586214	120586092	120586192	120588925	120589304	47426	1,2	0,0	22,13	2,8	121	99	0.000192938	0.00755175	1.0,1.0	0.9,0.571	0.264
41042	ENSMUSG00000002395.14	Use1	chr8	+	71367178	71367297	71367234	71367297	71366941	71367078	41042	12,11	8,7	25,25	69,43	155	99	0.00178085	0.0417417	0.489,0.501	0.188,0.271	0.265
47560	ENSMUSG00000031965.15	Tbx20	chr9	-	24770539	24770929	24770539	24770812	24773718	24774303	47560	2,8	0,0	18,7	4,1	198	99	0.000486333	0.015526	1.0,1.0	0.692,0.778	0.265
3584	ENSMUSG00000031278.12	Acsl4	chrX	-	142351378	142351908	142351378	142351618	142360386	142360436	3584	274225	166139	125122	256295	198	99	0	0	0.452,0.447	0.196,0.171	0.266
22498	ENSMUSG00000004267.16	Eno2	chr6	-	124766221	124766562	124766221	124766327	124767032	124767102	22498	6,10	0,0	28,10	8,1	198	99	2.64076e-05	0.00147118	1.0,1.0	0.636,0.833	0.266
35496	ENSMUSG00000038671.15	Arfrp1	chr2	-	181361000	181361069	181361000	181361066	181361390	181361472	35496	8,8	1,0	6,7	3,3	102	99	0.00096921	0.0262561	0.886,1.0	0.66,0.694	0.266
8622	ENSMUSG00000015461.15	Atf6b	chr17	+	34653485	34653572	34653504	34653572	34653213	34653295	8622	5,5	0,1	18,12	6,8	118	99	0.000894796	0.0247798	1.0,0.808	0.716,0.557	0.267
1074	ENSMUSG00000041297.8	Cdk13	chr13	-	17719355	17719805	17719355	17719625	17721087	17721293	1074	172143	41,29	139136	72121	198	99	5.58938e-07	5.4669e-05	0.677,0.711	0.491,0.36	0.268
3982	ENSMUSG00000054499.9	Dedd2	chr7	-	25218800	25219167	25218800	25219031	25219786	25219859	3982	494360	8,1	65,87	17,13	198	99	4.21885e-15	1.82283e-12	0.969,0.994	0.657,0.77	0.268
8508	ENSMUSG00000024422.14	Dhx16	chr17	+	35887127	35887498	35887423	35887498	35886089	35886242	8508	83,47	0,1	43,57	12,8	198	99	4.10864e-08	5.44187e-06	1.0,0.959	0.642,0.781	0.268
14520	ENSMUSG00000020770.13	Unk	chr11	+	116058242	116058424	116058326	116058424	116056190	116056379	14520	63,34	0,1	23,17	3,6	183	99	1.02161e-05	0.000657005	1.0,0.948	0.806,0.605	0.268
41041	ENSMUSG00000002395.14	Use1	chr8	+	71367173	71367297	71367234	71367297	71366941	71367078	41041	12,13	8,7	26,28	69,43	160	99	0.00148048	0.0364009	0.481,0.535	0.189,0.287	0.27
17305	ENSMUSG00000021024.14	Psma6	chr12	+	55418205	55418310	55418283	55418310	55414403	55414498	17305	4,7	1,0	40,30	19,11	177	99	0.00083458	0.0233887	0.691,1.0	0.541,0.604	0.273
24683	ENSMUSG00000022772.12	Senp5	chr16	-	31983492	31983864	31983492	31983631	31988939	31990465	24683	6,3	0,0	14,11	1,4	198	99	0.000336341	0.0116303	1.0,1.0	0.875,0.579	0.273
722	ENSMUSG00000034327.17	Kctd9	chr14	+	67729223	67729409	67729350	67729409	67728649	67728746	722	45,50	32,28	46,37	94117	198	99	1.04598e-09	2.02388e-07	0.413,0.472	0.197,0.137	0.275
4633	ENSMUSG00000029625.16	Cpsf4	chr5	+	145178757	145178928	145178832	145178928	145177229	145177302	4633	109112	64,53	134123	218238	174	99	6.64802e-13	2.27582e-10	0.492,0.546	0.259,0.227	0.276
15433	ENSMUSG00000002059.18	Rab34	chr11	+	78189009	78189390	78189204	78189390	78188439	78188511	15433	53,40	24,23	17,12	19,41	198	99	7.05457e-05	0.00335042	0.525,0.465	0.309,0.128	0.276
47268	ENSMUSG00000093904.2	Tomm20	chr8	-	126934985	126935057	126934985	126935009	126937039	126937182	47268	3,12	0,0	3,6	0,5	147	99	0.00172408	0.0407254	1.0,1.0	1.0,0.447	0.276
47789	ENSMUSG00000021273.11	Fdft1	chr14	-	63159237	63159681	63159237	63159359	63163301	63163485	47789	2,4	2,4	0,1	4,4	198	99	0.00126889	0.0323572	0.333,0.333	0.0,0.111	0.278
28	ENSMUSG00000086629.8	2810403D21Rik	chrX	+	108836228	108836355	108836265	108836355	108834577	108834685	28	5,2	0,1	13,9	9,6	136	99	0.00127742	0.0324853	1.0,0.593	0.513,0.522	0.279
30914	ENSMUSG00000025968.16	Ndufs1	chr1	-	63147289	63147424	63147289	63147417	63149956	63150111	30914	9,2	0,1	13,6	5,9	106	99	0.000556721	0.0172894	1.0,0.651	0.708,0.384	0.279
18159	ENSMUSG00000049606.16	Zfp644	chr5	-	106690603	106690877	106690603	106690873	106695642	106695699	18159	9,2	0,0	12,6	5,2	103	99	9.17395e-05	0.00413227	1.0,1.0	0.698,0.742	0.28
40836	ENSMUSG00000004270.13	Lpcat3	chr6	+	124701412	124701577	124701468	124701577	124700240	124700278	40836	5,4	0,0	8,12	1,5	155	99	8.54232e-05	0.00392321	1.0,1.0	0.836,0.605	0.28
2682	ENSMUSG00000029056.13	Pank4	chr4	+	154978920	154979025	154978954	154979025	154978392	154978442	2682	53,44	12,8	134145	124,84	133	99	4.18703e-06	0.000309014	0.767,0.804	0.446,0.562	0.282
6020	ENSMUSG00000038895.16	Zfp653	chr9	-	22057500	22057702	22057500	22057678	22057803	22058415	6020	22,14	3,1	25,24	9,18	123	99	0.00117271	0.0305289	0.855,0.918	0.691,0.518	0.282
40069	ENSMUSG00000068329.12	Htra2	chr6	-	83052472	83052861	83052472	83052542	83053037	83053070	40069	7,11	1,0	65,76	18,29	198	99	0.000236712	0.00888488	0.778,1.0	0.644,0.567	0.284
30694	ENSMUSG00000013593.12	Ndufs2	chr1	-	171246090	171246218	171246090	171246195	171246993	171247122	30694	5,1	6,4	0,0	5,1	122	99	9.14979e-05	0.00412556	0.403,0.169	0.0,0.0	0.286
46982	ENSMUSG00000031843.2	Mphosph6	chr8	-	117792678	117792794	117792678	117792773	117794580	117794671	46982	2,5	1,0	6,6	5,4	120	99	0.00110855	0.0292436	0.623,1.0	0.497,0.553	0.286
48650	ENSMUSG00000028788.14	Ptp4a2	chr4	+	129846447	129846501	129846464	129846501	129842669	129842762	48650	28,16	7,9	41,27	45,40	116	99	0.000964663	0.0262251	0.773,0.603	0.437,0.366	0.286
25285	ENSMUSG00000002635.11	Pdcd2l	chr7	-	34196065	34196402	34196065	34196363	34196535	34196661	25285	4,7	0,0	8,9	2,3	138	99	0.000584335	0.0178972	1.0,1.0	0.742,0.683	0.287
40177	ENSMUSG00000030016.14	Zfp638	chr6	+	83979843	83979909	83979846	83979909	83976201	83976350	40177	1,2	0,0	10,14	3,7	102	99	8.78509e-05	0.00400577	1.0,1.0	0.764,0.66	0.288
49094	ENSMUSG00000032478.14	Nme6	chr9	+	109835259	109835414	109835322	109835414	109833290	109833295	49094	10,4	0,0	5,10	1,3	162	99	0.00166597	0.0397751	1.0,1.0	0.753,0.671	0.288
4697	ENSMUSG00000030556.13	Lrrc28	chr7	-	67559857	67560064	67559857	67559969	67617992	67618130	4697	15,28	4,3	37,44	25,25	194	99	0.0020134	0.0458198	0.657,0.826	0.43,0.473	0.29
40094	ENSMUSG00000068328.9	Aup1	chr6	+	83056763	83056837	83056786	83056837	83056541	83056644	40094	8,5	16,5	0,9	37,40	122	99	0.0017078	0.0404482	0.289,0.448	0.0,0.154	0.291
38358	ENSMUSG00000057691.8	Zfp746	chr6	-	48083092	48083219	48083092	48083174	48083305	48083605	38358	41,24	29,44	8,12	78,64	144	99	7.21607e-07	6.74657e-05	0.493,0.273	0.066,0.114	0.293
38632	ENSMUSG00000045438.12	Cox19	chr5	-	139339148	139339576	139339148	139339239	139342562	139342674	38632	2,7	0,0	7,5	5,0	198	99	0.00164586	0.039443	1.0,1.0	0.412,1.0	0.294
44209	ENSMUSG00000003131.7	Pafah1b2	chr9	-	45981042	45981224	45981042	45981117	45984704	45985051	44209	4,10	0,0	7,7	5,0	198	99	0.00186162	0.0430825	1.0,1.0	0.412,1.0	0.294
26747	ENSMUSG00000059423.13	Zfp933	chr4	-	147828409	147828845	147828409	147828754	147848277	147848366	26747	1,2	0,0	12,15	4,2	190	99	9.70516e-05	0.00433209	1.0,1.0	0.61,0.796	0.297
49448	ENSMUSG00000019792.8	Trmt11	chr10	-	30567760	30567871	30567760	30567868	30587438	30587595	49448	2,3	0,1	15,17	11,12	102	99	0.00155238	0.0378515	1.0,0.744	0.57,0.579	0.297
1912	ENSMUSG00000037692.14	Ahdc1	chr4	+	133060675	133060892	133060780	133060892	133055012	133055203	1912	175107	32,29	42,22	20,30	198	99	0.00041213	0.0136466	0.732,0.648	0.512,0.268	0.3
14960	ENSMUSG00000049807.16	Arhgap23	chr11	+	97463383	97463701	97463632	97463701	97456454	97456598	14960	32,34	1,0	14,19	4,4	198	99	3.40082e-05	0.00181037	0.941,1.0	0.636,0.704	0.3
23785	ENSMUSG00000035992.15	Fnip1	chr11	+	54475616	54475766	54475634	54475766	54466086	54466213	23785	8,7	13,11	2,0	17,5	117	99	0.000339487	0.0117027	0.342,0.35	0.091,0.0	0.3
41193	ENSMUSG00000032899.14	Styk1	chr6	-	131322324	131322501	131322324	131322381	131353484	131353597	41193	4,1	0,0	13,10	10,0	198	99	0.000636711	0.0190044	1.0,1.0	0.394,1.0	0.303
590	ENSMUSG00000015377.10	Dennd6b	chr15	-	89186955	89187050	89186955	89186998	89187147	89187243	590	24,25	1,0	58,54	16,21	151	99	2.31878e-07	2.5281e-05	0.94,1.0	0.704,0.628	0.304
45888	ENSMUSG00000015127.14	Unkl	chr17	+	25189465	25189675	25189568	25189675	25188396	25188492	45888	38,39	1,4	22,18	10,5	198	99	0.000505627	0.0159977	0.95,0.83	0.524,0.643	0.306
6993	ENSMUSG00000036748.16	Cuedc2	chr19	-	46331288	46331656	46331288	46331635	46331756	46331818	6993	4,2	0,0	21,28	8,10	120	99	8.48937e-05	0.00390695	1.0,1.0	0.684,0.698	0.309
10627	ENSMUSG00000033170.14	Card10	chr15	-	78789730	78790026	78789730	78789815	78791040	78791232	10627	20,18	0,0	14,23	4,4	198	99	1.31026e-05	0.000818967	1.0,1.0	0.636,0.742	0.311
35806	ENSMUSG00000044700.15	Tmem201	chr4	-	149718650	149718944	149718650	149718835	149719511	149719583	35806	50,56	1,0	25,33	4,12	198	99	9.65168e-08	1.18983e-05	0.962,1.0	0.758,0.579	0.312
42693	ENSMUSG00000038535.17	Zfp280d	chr9	+	72301683	72302006	72301866	72302006	72298726	72298848	42693	5,3	0,1	14,7	9,3	198	99	0.00158604	0.0383605	1.0,0.6	0.438,0.538	0.312
40090	ENSMUSG00000068328.9	Aup1	chr6	+	83056722	83056837	83056786	83056837	83056541	83056644	40090	36,19	16,5	22,41	37,40	163	99	0.000601894	0.0182591	0.577,0.698	0.265,0.384	0.313
2902	ENSMUSG00000043059.16	Zfp513	chr5	-	31200234	31200386	31200234	31200383	31200651	31200762	2902	2,2	0,0	5,7	1,6	102	99	4.25324e-05	0.00218823	1.0,1.0	0.829,0.531	0.32
36487	ENSMUSG00000033862.7	Cdk10	chr8	+	123227280	123227743	123227659	123227743	123226945	123227017	36487	4,8	0,0	43,21	10,5	198	99	4.65845e-05	0.00235585	1.0,1.0	0.683,0.677	0.32
44964	ENSMUSG00000033543.17	Gtf2a2	chr9	+	70017072	70017191	70017143	70017191	70016818	70016923	44964	3,2	0,0	31,27	12,5	170	99	0.000132102	0.00552011	1.0,1.0	0.601,0.759	0.32
15122	ENSMUSG00000091228.1	Gm20390	chr11	-	93954819	93955222	93954819	93955192	93955494	93955624	15122	4,3	0,1	5,5	4,3	129	99	0.00118998	0.0307894	1.0,0.697	0.49,0.561	0.323
29872	ENSMUSG00000003355.7	Fkbp11	chr15	-	98726899	98727293	98726899	98726933	98727682	98727748	29872	8,7	0,0	20,17	3,6	198	99	1.62884e-05	0.000986234	1.0,1.0	0.769,0.586	0.323
36289	ENSMUSG00000009555.16	Cdk9	chr2	-	32709466	32709612	32709466	32709558	32709772	32709944	36289	4,8	0,0	6,14	2,4	153	99	0.00014814	0.00604227	1.0,1.0	0.66,0.694	0.323
24840	ENSMUSG00000065990.12	Aurkaip1	chr4	+	155832415	155832739	155832616	155832739	155831982	155832070	24840	25,12	0,0	23,10	3,4	198	99	2.09871e-05	0.00122732	1.0,1.0	0.793,0.556	0.325
20305	ENSMUSG00000002825.8	Qtrt1	chr9	+	21412370	21412505	21412397	21412505	21412232	21412301	20305	2,5	0,0	7,6	3,2	126	99	0.000420019	0.0138156	1.0,1.0	0.647,0.702	0.326
40067	ENSMUSG00000068329.12	Htra2	chr6	-	83052472	83052821	83052472	83052542	83053037	83053070	40067	7,10	1,0	52,66	18,29	198	99	0.000150189	0.00610399	0.778,1.0	0.591,0.532	0.328
4278	ENSMUSG00000028522.16	Mier1	chr4	+	103118238	103118315	103118241	103118315	103115559	103115660	4278	6,1	0,0	19,26	12,9	102	99	4.36945e-05	0.0022351	1.0,1.0	0.606,0.737	0.329
36185	ENSMUSG00000025779.10	Ly96	chr1	+	16700797	16700923	16700834	16700923	16691683	16691773	36185	3,1	0,0	7,5	0,7	136	99	0.00144505	0.0358469	1.0,1.0	1.0,0.342	0.329
35703	ENSMUSG00000037174.18	Elf2	chr3	-	51264861	51265073	51264861	51265006	51266752	51266866	35703	86,93	58,58	78,82	275271	166	99	0	0	0.469,0.489	0.145,0.153	0.33
46983	ENSMUSG00000031843.2	Mphosph6	chr8	-	117792678	117792873	117792678	117792773	117794580	117794671	46983	2,5	1,0	7,6	5,4	198	99	0.00196192	0.0449132	0.5,1.0	0.412,0.429	0.33
26661	ENSMUSG00000021982.14	Cdadc1	chr14	-	59567728	59568038	59567728	59568019	59568947	59569008	26661	2,1	0,0	7,23	5,5	118	99	7.9665e-05	0.00371239	1.0,1.0	0.54,0.794	0.333
31872	ENSMUSG00000063229.15	Ldha	chr7	+	46847241	46847646	46847538	46847646	46845869	46845917	31872	52,24	0,0	83,49	21,12	198	99	1.74271e-09	3.1916e-07	1.0,1.0	0.664,0.671	0.333
38128	ENSMUSG00000049971.17	Glt1d1	chr5	+	127691526	127691902	127691735	127691902	127690989	127691110	38128	9,7	9,7	0,0	14,10	198	99	5.30215e-08	6.78051e-06	0.333,0.333	0.0,0.0	0.333
40425	ENSMUSG00000059439.15	Bcas3	chr11	+	85821775	85822112	85822021	85822112	85801820	85801952	40425	3,2	3,2	0,0	2,2	198	99	0.000734977	0.021228	0.333,0.333	0.0,0.0	0.333
31757	ENSMUSG00000058135.12	Gstm1	chr3	-	108014944	108015334	108014944	108015037	108016327	108016428	31757	1,4	0,1	0,1	6,0	198	99	0.000285152	0.0101765	1.0,0.667	0.0,1.0	0.334
40068	ENSMUSG00000068329.12	Htra2	chr6	-	83052472	83052828	83052472	83052542	83053037	83053070	40068	8,8	1,0	52,68	18,29	198	99	0.000183694	0.00723773	0.8,1.0	0.591,0.54	0.335
3390	ENSMUSG00000026153.15	Fam135a	chr1	-	24028199	24030528	24028199	24029940	24030741	24030896	3390	174129	7,8	98162	53,41	198	99	1.01013e-09	1.96305e-07	0.926,0.89	0.48,0.664	0.336
21152	ENSMUSG00000078994.9	Zfp429	chr13	-	67397262	67397563	67397262	67397370	67399695	67399767	21152	13,2	0,0	11,24	4,4	198	99	2.04167e-05	0.00119711	1.0,1.0	0.579,0.75	0.336
21561	ENSMUSG00000045917.17	Tmem268	chr4	+	63560881	63560995	63560911	63560995	63560226	63560725	21561	2,2	0,0	6,11	6,1	129	99	0.000135653	0.00564203	1.0,1.0	0.434,0.894	0.336
4009	ENSMUSG00000034903.18	Cobll1	chr2	-	65150978	65151167	65150978	65151164	65238362	65238626	4009	27,34	12,10	13,7	21,10	102	99	0.000109217	0.00476986	0.686,0.767	0.375,0.405	0.337
8265	ENSMUSG00000041057.10	Wdr43	chr17	+	71632014	71632141	71632042	71632141	71630160	71630281	8265	2,2	0,0	5,8	3,2	127	99	0.000169598	0.00678743	1.0,1.0	0.565,0.757	0.339
31376	ENSMUSG00000031278.12	Acsl4	chrX	-	142351378	142351908	142351378	142351618	142360382	142360436	31376	170128	7,1	76,68	12,38	198	99	9.3186e-08	1.15196e-05	0.924,0.985	0.76,0.472	0.339
29371	ENSMUSG00000026005.15	Rpe	chr1	+	66701275	66701636	66701616	66701636	66700906	66701017	29371	38,40	17,9	27,26	42,31	198	99	2.00579e-05	0.00118074	0.528,0.69	0.243,0.295	0.34
40015	ENSMUSG00000030008.9	Pradc1	chr6	-	85447935	85448591	85447935	85448045	85451112	85451377	40015	33,21	0,2	26,42	14,10	198	99	2.34952e-05	0.00134743	1.0,0.84	0.481,0.677	0.341
40066	ENSMUSG00000068329.12	Htra2	chr6	-	83052472	83052770	83052472	83052542	83053037	83053070	40066	9,8	1,0	53,66	18,29	198	99	0.000127606	0.00537083	0.818,1.0	0.596,0.532	0.345
48622	ENSMUSG00000017167.6	Cntnap1	chr11	+	101178814	101178999	101178818	101178999	101178235	101178439	48622	21,13	0,0	10,5	3,4	103	99	1.0146e-05	0.000654385	1.0,1.0	0.762,0.546	0.346
2692	ENSMUSG00000026975.10	Dph7	chr2	+	24965556	24965654	24965559	24965654	24963022	24963156	2692	1,1	0,0	9,4	2,4	102	99	0.00010393	0.00459053	1.0,1.0	0.814,0.493	0.347
30355	ENSMUSG00000038886.10	Man2a2	chr7	-	80362845	80363328	80362845	80363238	80363466	80363669	30355	21,7	2,1	28,15	15,10	189	99	0.000925048	0.0253494	0.846,0.786	0.494,0.44	0.349
42867	ENSMUSG00000096054.3	Syne1	chr10	-	5157620	5157759	5157620	5157734	5161451	5161561	42867	3,10	0,0	14,7	6,3	124	99	1.66518e-05	0.0010055	1.0,1.0	0.651,0.651	0.349
41688	ENSMUSG00000032298.13	Neil1	chr9	-	57144944	57145366	57144944	57145008	57146600	57147057	41688	1,3	0,0	8,10	1,5	198	99	2.96354e-05	0.00161897	1.0,1.0	0.8,0.5	0.35
21769	ENSMUSG00000020736.12	Nt5c	chr11	-	115490419	115490738	115490419	115490665	115490852	115491202	21769	5,12	0,1	43,38	15,18	172	99	0.000105341	0.00464159	1.0,0.874	0.623,0.549	0.351
5407	ENSMUSG00000026004.15	Kansl1l	chr1	-	66773421	66773619	66773421	66773514	66777966	66778108	5407	68,93	14,9	84,82	56,59	198	99	2.11895e-08	2.97927e-06	0.708,0.838	0.429,0.41	0.353
31874	ENSMUSG00000063229.15	Ldha	chr7	+	46847325	46847646	46847538	46847646	46845869	46845917	31874	43,24	0,0	73,46	21,12	198	99	1.97545e-09	3.54489e-07	1.0,1.0	0.635,0.657	0.354
26749	ENSMUSG00000059423.13	Zfp933	chr4	-	147828669	147829011	147828669	147828754	147848277	147848366	26749	2,2	0,0	8,15	4,2	198	99	4.31668e-05	0.00221575	1.0,1.0	0.5,0.789	0.355
4067	ENSMUSG00000040363.15	Bcor	chrX	-	12048302	12048647	12048302	12048545	12048994	12049252	4067	114129	12,14	43,50	24,29	198	99	9.69033e-10	1.91666e-07	0.826,0.822	0.473,0.463	0.356
39085	ENSMUSG00000019373.11	Cops3	chr11	-	59823748	59824094	59823748	59823824	59824274	59824448	39085	4,2	0,0	11,17	2,7	198	99	9.99743e-06	0.000648565	1.0,1.0	0.733,0.548	0.359
35148	ENSMUSG00000035242.15	Oaz1	chr10	+	80828319	80828633	80828460	80828633	80826692	80826905	35148	19,22	2,1	46,28	21,14	198	99	7.44452e-05	0.00349476	0.826,0.917	0.523,0.5	0.36
46506	ENSMUSG00000052456.9	Asna1	chr8	-	85019517	85019973	85019517	85019905	85024177	85024325	46506	9,13	0,2	30,14	11,10	167	99	0.00131575	0.0332698	1.0,0.794	0.618,0.454	0.361
35149	ENSMUSG00000035242.15	Oaz1	chr10	+	80828357	80828633	80828460	80828633	80826692	80826905	35149	20,24	2,1	46,29	21,14	198	99	4.07625e-05	0.00211428	0.833,0.923	0.523,0.509	0.362
7494	ENSMUSG00000024925.11	Rnaseh2c	chr19	+	5602158	5602236	5602200	5602236	5601974	5602080	7494	3,3	0,0	8,7	3,3	141	99	9.50929e-05	0.00426175	1.0,1.0	0.652,0.621	0.363
31069	ENSMUSG00000032035.15	Ets1	chr9	+	32733978	32734188	32734091	32734188	32732948	32733026	31069	3,4	0,0	6,6	8,0	198	99	0.000968439	0.0262561	1.0,1.0	0.273,1.0	0.363
35494	ENSMUSG00000038671.15	Arfrp1	chr2	-	181359427	181359846	181359427	181359561	181361000	181361472	35494	7,8	0,0	20,8	3,4	198	99	1.80842e-05	0.0010861	1.0,1.0	0.769,0.5	0.365
5699	ENSMUSG00000028060.14	Khdc4	chr3	+	88709829	88709942	88709857	88709942	88708779	88708941	5699	142113	6,10	173231	140110	127	99	0	0	0.949,0.898	0.491,0.621	0.367
7859	ENSMUSG00000024481.5	Lvrn	chr18	+	46876882	46877037	46876910	46877037	46873781	46873908	7859	1,1	0,0	6,5	2,3	127	99	0.000124615	0.00529105	1.0,1.0	0.7,0.565	0.368
34144	ENSMUSG00000031776.17	Arl2bp	chr8	+	94670328	94670427	94670334	94670427	94667596	94667658	34144	5,8	0,0	5,5	1,6	105	99	2.73297e-05	0.00151276	1.0,1.0	0.825,0.44	0.368
42013	ENSMUSG00000027667.13	Zfp639	chr3	+	32515283	32517139	32517028	32517139	32513008	32513192	42013	14,4	0,0	40,23	13,6	198	99	6.57816e-06	0.000451771	1.0,1.0	0.606,0.657	0.369
48717	ENSMUSG00000022744.12	Cldnd1	chr16	+	58729442	58729747	58729502	58729747	58728047	58728084	48717	13,5	0,0	5,6	2,2	159	99	0.000454798	0.0147521	1.0,1.0	0.609,0.651	0.37
12583	ENSMUSG00000015478.13	Rnf5	chr17	-	34601740	34601963	34601740	34601858	34602084	34602197	12583	7,4	0,0	12,12	9,1	198	99	2.40459e-05	0.00137273	1.0,1.0	0.4,0.857	0.371
21296	ENSMUSG00000028333.10	Anp32b	chr4	+	46469885	46470007	46469897	46470007	46468558	46468787	21296	9,7	0,0	9,5	23,0	111	99	0.0005987	0.018187	1.0,1.0	0.259,1.0	0.371
43229	ENSMUSG00000000581.8	C1d	chr11	+	17262604	17262794	17262647	17262794	17257687	17258007	43229	29,19	4,3	85,74	68,66	142	99	9.22486e-07	8.37825e-05	0.835,0.815	0.466,0.439	0.372
2973	ENSMUSG00000042831.13	Alkbh6	chr7	+	30312505	30312707	30312590	30312707	30312236	30312388	2973	123117	55,60	81,99	250274	184	99	0	0	0.546,0.512	0.148,0.163	0.374
7266	ENSMUSG00000024664.5	Fads3	chr19	+	10054437	10054666	10054454	10054666	10054226	10054349	7266	5,5	0,0	3,4	1,3	116	99	0.00095794	0.0261061	1.0,1.0	0.719,0.532	0.375
31756	ENSMUSG00000058135.12	Gstm1	chr3	-	108014944	108015145	108014944	108015037	108016327	108016428	31756	1,6	0,1	0,1	6,0	198	99	0.000244532	0.00906111	1.0,0.75	0.0,1.0	0.375
48963	ENSMUSG00000010067.13	Rassf1	chr9	+	107557292	107557557	107557452	107557557	107556610	107556751	48963	16,11	1,0	14,9	6,3	198	99	6.82329e-05	0.00326744	0.889,1.0	0.538,0.6	0.376
45338	ENSMUSG00000039176.17	Polg	chr7	-	79459173	79459606	79459173	79459300	79459688	79459871	45338	4,6	0,0	31,10	7,4	198	99	2.36989e-05	0.00135562	1.0,1.0	0.689,0.556	0.377
3583	ENSMUSG00000031278.12	Acsl4	chrX	-	142351378	142351908	142351378	142351615	142360386	142360436	3583	292243	39,18	141141	76,96	198	99	0	0	0.789,0.871	0.481,0.423	0.378
18239	ENSMUSG00000051950.10	B3glct	chr5	+	149695832	149696042	149695980	149696042	149678229	149678379	18239	9,3	4,5	0,0	3,3	198	99	1.32614e-05	0.000826573	0.529,0.231	0.0,0.0	0.38
39714	ENSMUSG00000056724.15	Nbeal2	chr9	-	110632734	110632886	110632734	110632815	110632976	110633155	39714	1,3	0,0	5,5	3,1	170	99	0.000770179	0.0219291	1.0,1.0	0.493,0.744	0.381
20450	ENSMUSG00000029290.12	Zfp326	chr5	+	105888433	105888839	105888735	105888839	105886186	105886276	20450	5,3	0,0	3,7	1,2	198	99	0.00200835	0.0457643	1.0,1.0	0.6,0.636	0.382
33449	ENSMUSG00000026806.15	Ddx31	chr2	+	28844841	28845273	28845197	28845273	28840458	28840860	33449	2,8	0,0	7,6	2,2	198	99	0.000541256	0.016931	1.0,1.0	0.636,0.6	0.382
41385	ENSMUSG00000040370.13	Etfrf1	chr6	+	145214521	145215271	145215183	145215271	145211133	145211400	41385	8,4	0,0	14,3	4,1	198	99	0.00019411	0.0075776	1.0,1.0	0.636,0.6	0.382
48073	ENSMUSG00000032299.10	Commd4	chr9	-	57155901	57156083	57155901	57156014	57156171	57156555	48073	4,6	0,0	38,22	11,10	168	99	2.52176e-05	0.00142238	1.0,1.0	0.671,0.565	0.382
38101	ENSMUSG00000029482.4	Aacs	chr5	+	125513083	125513201	125513106	125513201	125512698	125512738	38101	8,6	0,0	9,15	8,4	122	99	7.13764e-06	0.000485698	1.0,1.0	0.477,0.753	0.385
17314	ENSMUSG00000021024.14	Psma6	chr12	+	55418280	55418310	55418283	55418310	55414403	55414498	17314	6,7	1,0	19,16	19,11	102	99	1.88268e-05	0.00112012	0.853,1.0	0.493,0.585	0.388
35880	ENSMUSG00000028907.7	Utp11	chr4	-	124682192	124682340	124682192	124682291	124682412	124683348	35880	6,7	0,1	10,15	7,8	148	99	0.000143116	0.00590278	1.0,0.824	0.489,0.556	0.389
30288	ENSMUSG00000027433.5	Xrn2	chr2	+	147029316	147029628	147029494	147029628	147028092	147028250	30288	10,7	0,0	14,5	0,9	198	99	0.00147496	0.0362853	1.0,1.0	1.0,0.217	0.391
18242	ENSMUSG00000051950.10	B3glct	chr5	+	149695872	149696042	149695980	149696042	149678229	149678379	18242	10,3	4,5	0,0	3,3	198	99	1.13114e-05	0.000721192	0.556,0.231	0.0,0.0	0.394
46793	ENSMUSG00000014786.8	Slc9a5	chr8	+	105361488	105361638	105361560	105361638	105359326	105359453	46793	10,7	0,0	44,41	15,17	171	99	2.61123e-06	0.000208631	1.0,1.0	0.629,0.583	0.394
46441	ENSMUSG00000057672.16	Pkn1	chr8	-	83680953	83681343	83680953	83681097	83683398	83683593	46441	2,8	0,0	10,6	6,1	198	99	4.84518e-06	0.000351753	1.0,1.0	0.455,0.75	0.397
3924	ENSMUSG00000030177.14	Ccdc77	chr6	-	120350206	120350444	120350206	120350390	120354000	120354054	3924	64,77	11,12	145155	143148	153	99	1.38778e-14	5.82645e-12	0.79,0.806	0.396,0.404	0.398
48774	ENSMUSG00000028580.15	Pum1	chr4	+	130743677	130743794	130743689	130743794	130741462	130741556	48774	67,43	70,45	7,7	93,96	111	99	0	0	0.461,0.46	0.063,0.061	0.399
8256	ENSMUSG00000024069.14	Slc30a6	chr17	+	74412247	74412726	74412606	74412726	74410333	74410428	8256	1,5	0,0	11,13	4,4	198	99	3.41637e-05	0.00181431	1.0,1.0	0.579,0.619	0.401
9948	ENSMUSG00000022503.10	Nubp1	chr16	+	10421229	10421337	10421241	10421337	10420973	10421128	9948	7,4	0,0	6,2	2,2	111	99	0.00155736	0.037852	1.0,1.0	0.728,0.471	0.401
17554	ENSMUSG00000054452.10	Aes	chr10	+	81564812	81564910	81564820	81564910	81564672	81564717	17554	24,13	0,0	4,3	1,4	107	99	9.34698e-05	0.00419747	1.0,1.0	0.787,0.41	0.401
31283	ENSMUSG00000060862.10	Zbtb40	chr4	-	136988547	136988765	136988547	136988706	136991497	136991662	31283	7,4	0,0	11,3	1,4	158	99	0.000268571	0.00971727	1.0,1.0	0.873,0.32	0.403
12163	ENSMUSG00000021816.11	Ppp3cb	chr14	-	20523778	20524095	20523778	20523856	20524356	20524502	12163	8,7	0,0	10,9	5,2	198	99	3.62499e-06	0.000274826	1.0,1.0	0.5,0.692	0.404
10529	ENSMUSG00000060036.14	Rpl3	chr15	-	80082117	80082574	80082117	80082563	80083323	80083406	10529	22,22	8,13	8,11	23,27	110	99	5.18741e-06	0.000370554	0.712,0.604	0.238,0.268	0.405
18232	ENSMUSG00000051950.10	B3glct	chr5	+	149695656	149696042	149695980	149696042	149678229	149678379	18232	11,3	4,5	0,0	3,3	198	99	9.76191e-06	0.000637936	0.579,0.231	0.0,0.0	0.405
37670	ENSMUSG00000026335.16	Pam	chr1	-	97822935	97822992	97822935	97822989	97831454	97831508	37670	2,1	0,1	7,10	18,14	102	99	0.00180605	0.0421306	1.0,0.493	0.274,0.409	0.405
48074	ENSMUSG00000032299.10	Commd4	chr9	-	57155901	57156093	57155901	57156014	57156171	57156555	48074	4,6	0,0	35,22	11,10	178	99	1.98653e-05	0.00117095	1.0,1.0	0.639,0.55	0.405
18236	ENSMUSG00000051950.10	B3glct	chr5	+	149695757	149696042	149695980	149696042	149678229	149678379	18236	9,4	4,5	0,0	3,3	198	99	7.24726e-06	0.000492404	0.529,0.286	0.0,0.0	0.407
6422	ENSMUSG00000038344.14	Txlng	chrX	-	162811291	162811402	162811291	162811385	162811535	162812633	6422	2,1	0,0	3,9	4,2	116	99	5.41831e-05	0.00269119	1.0,1.0	0.39,0.793	0.408
34903	ENSMUSG00000037996.17	Slc24a2	chr4	-	86991172	86991593	86991172	86991389	86996512	86996679	34903	3,4	0,0	5,13	2,4	198	99	4.91682e-05	0.00246411	1.0,1.0	0.556,0.619	0.412
3320	ENSMUSG00000026017.13	Carf	chr1	+	60109221	60109449	60109326	60109449	60105343	60105427	3320	30,33	7,4	14,13	12,16	198	99	1.82883e-05	0.00109688	0.682,0.805	0.368,0.289	0.415
15388	ENSMUSG00000041958.10	Pigs	chr11	+	78328733	78329086	78328974	78329086	78328414	78328508	15388	9,11	0,0	9,16	3,6	198	99	4.55315e-06	0.000331634	1.0,1.0	0.6,0.571	0.415
9612	ENSMUSG00000014075.15	Tctex1d2	chr16	+	32425240	32426921	32426857	32426921	32422819	32422965	9612	2,1	0,0	4,8	1,4	198	99	2.29421e-05	0.00132082	1.0,1.0	0.667,0.5	0.416
48739	ENSMUSG00000032411.15	Tfdp2	chr9	+	96229355	96229449	96229358	96229449	96223093	96223198	48739	2,2	0,0	3,3	1,4	102	99	5.8511e-05	0.00286775	1.0,1.0	0.744,0.421	0.417
14975	ENSMUSG00000001441.13	Npepps	chr11	-	97231888	97232022	97231888	97231996	97235054	97235115	14975	1,6	0,0	9,2	1,4	125	99	0.000408402	0.0135433	1.0,1.0	0.877,0.284	0.419
17520	ENSMUSG00000022125.7	Cln5	chr14	+	103071997	103072115	103072002	103072115	103071729	103071799	17520	5,5	1,0	1,8	4,2	104	99	0.00132234	0.0334173	0.826,1.0	0.192,0.792	0.421
18427	ENSMUSG00000025047.9	Pdcd11	chr19	+	47092532	47092900	47092787	47092900	47090767	47090867	18427	6,5	2,4	0,1	11,3	198	99	9.98068e-06	0.000648423	0.6,0.385	0.0,0.143	0.421
25681	ENSMUSG00000024542.9	Cep192	chr18	+	67850115	67850553	67850409	67850553	67847351	67847582	25681	4,2	0,0	5,6	2,2	198	99	0.000384955	0.0129004	1.0,1.0	0.556,0.6	0.422
4714	ENSMUSG00000060771.14	Tsga10	chr1	-	37841184	37841352	37841184	37841308	37842454	37842520	4714	1,2	0,0	7,18	3,11	143	99	3.58162e-05	0.00188631	1.0,1.0	0.618,0.531	0.425
18420	ENSMUSG00000029253.12	Cenpc1	chr5	-	86060524	86060896	86060524	86060553	86062003	86062047	18420	47,43	7,11	23,54	56,39	198	99	2.95762e-06	0.00023011	0.77,0.662	0.17,0.409	0.426
37343	ENSMUSG00000027589.14	Pcmtd2	chr2	+	181854872	181855338	181855301	181855338	181851585	181851709	37343	40,15	2,1	63,87	45,39	198	99	1.48629e-07	1.73153e-05	0.909,0.882	0.412,0.527	0.426
22199	ENSMUSG00000020974.6	Pole2	chr12	-	69209821	69210027	69209821	69209962	69211372	69211445	22199	1,1	0,0	5,6	3,2	164	99	3.91902e-05	0.00204225	1.0,1.0	0.502,0.644	0.427
43775	ENSMUSG00000032246.14	Calml4	chr9	+	62875311	62875644	62875476	62875644	62858133	62858161	43775	4,3	0,0	12,12	4,5	198	99	1.74443e-05	0.00104909	1.0,1.0	0.6,0.545	0.427
4201	ENSMUSG00000037174.18	Elf2	chr3	-	51264868	51265042	51264868	51265006	51266752	51266866	4201	316288	58,58	174259	275271	135	99	0	0	0.8,0.785	0.317,0.412	0.428
26358	ENSMUSG00000030282.14	Cmas	chr6	+	142767790	142767937	142767839	142767937	142764553	142764709	26358	2,1	0,0	5,8	2,5	148	99	9.17472e-06	0.000605061	1.0,1.0	0.626,0.517	0.428
14839	ENSMUSG00000017801.15	Mlx	chr11	+	101088247	101088704	101088597	101088704	101087753	101087790	14839	8,15	9,2	15,17	63,57	198	99	0.00156872	0.0380451	0.308,0.789	0.106,0.13	0.43
42746	ENSMUSG00000029267.17	Mtf2	chr5	+	108069108	108069363	108069165	108069363	108065756	108065965	42746	6,2	1,0	3,3	5,1	156	99	0.000695887	0.0203476	0.792,1.0	0.276,0.656	0.43
49131	ENSMUSG00000001666.8	Ddt	chr10	-	75772737	75773092	75772737	75773067	75773215	75773414	49131	2,8	1,0	3,2	2,6	124	99	0.000158728	0.00642754	0.615,1.0	0.545,0.21	0.43
39575	ENSMUSG00000034566.10	Atp5h	chr11	-	115415688	115415896	115415688	115415843	115416014	115416077	39575	14,6	0,0	22,18	12,8	152	99	4.90133e-07	4.86298e-05	1.0,1.0	0.544,0.594	0.431
1233	ENSMUSG00000017801.15	Mlx	chr11	+	101088592	101088704	101088597	101088704	101087753	101087790	1233	6,5	9,2	6,10	63,57	104	99	0.000892112	0.0247362	0.388,0.704	0.083,0.143	0.433
37345	ENSMUSG00000027589.14	Pcmtd2	chr2	+	181854918	181855338	181855301	181855338	181851585	181851709	37345	46,18	2,1	65,85	45,39	198	99	9.02983e-09	1.39621e-06	0.92,0.9	0.419,0.521	0.44
14949	ENSMUSG00000017404.12	Rpl19	chr11	+	98029754	98029885	98029783	98029885	98029394	98029515	14949	4,1	2,2	0,0	2,3	128	99	6.60916e-05	0.00317976	0.607,0.279	0.0,0.0	0.443
10854	ENSMUSG00000072501.5	Phf20l1	chr15	+	66604745	66605197	66604776	66605197	66604161	66604240	10854	27,26	19,22	8,12	132140	130	99	0	0	0.52,0.474	0.044,0.061	0.445
39576	ENSMUSG00000034566.10	Atp5h	chr11	-	115415688	115415903	115415688	115415843	115416014	115416077	39576	14,6	0,0	24,16	12,8	159	99	4.6108e-07	4.60853e-05	1.0,1.0	0.555,0.555	0.445
3321	ENSMUSG00000026017.13	Carf	chr1	+	60109221	60109449	60109326	60109449	60108082	60108200	3321	29,27	4,3	20,23	19,20	198	99	7.53893e-07	6.98969e-05	0.784,0.818	0.345,0.365	0.446
10097	ENSMUSG00000023021.15	Cers5	chr15	-	99739264	99739730	99739264	99739512	99745888	99745946	10097	9,11	0,0	27,22	9,11	198	99	1.14515e-06	0.000100717	1.0,1.0	0.6,0.5	0.45
9442	ENSMUSG00000022749.8	Tbc1d23	chr16	-	57212370	57212570	57212370	57212490	57214163	57214269	9442	4,4	1,0	13,5	8,6	179	99	0.000561912	0.0173779	0.689,1.0	0.473,0.315	0.451
4374	ENSMUSG00000004565.15	Pnpla6	chr8	+	3523998	3524166	3524010	3524166	3523757	3523867	4374	45,43	20,15	10,29	46,56	111	99	1.22061e-09	2.3214e-07	0.667,0.719	0.162,0.316	0.454
33732	ENSMUSG00000038900.17	Rpl12	chr2	+	32963256	32963583	32963474	32963583	32962984	32963066	33732	83,65	11,12	6,10	7,11	198	99	1.6224e-06	0.00013623	0.79,0.73	0.3,0.312	0.454
36199	ENSMUSG00000055681.14	Cope	chr8	+	70306292	70306651	70306504	70306651	70305697	70305735	36199	7,3	2,4	0,0	6,5	198	99	3.82718e-06	0.000287704	0.636,0.273	0.0,0.0	0.455
22407	ENSMUSG00000078773.11	Rad54b	chr4	+	11578633	11578957	11578713	11578957	11569820	11569932	22407	9,2	0,0	21,11	10,5	179	99	5.52244e-06	0.000390723	1.0,1.0	0.537,0.549	0.457
26654	ENSMUSG00000043059.16	Zfp513	chr5	-	31200234	31200545	31200234	31200383	31200651	31200762	26654	2,3	0,0	5,7	1,6	198	99	2.43147e-06	0.000196029	1.0,1.0	0.714,0.368	0.459
39638	ENSMUSG00000032182.15	Yipf2	chr9	-	21591899	21592216	21591899	21591980	21592527	21592828	39638	3,1	0,0	13,6	7,2	198	99	2.79866e-06	0.000220831	1.0,1.0	0.481,0.6	0.46
24967	ENSMUSG00000033991.9	Ttc37	chr13	+	76111676	76111816	76111733	76111816	76108192	76108283	24967	21,11	1,3	14,6	13,9	156	99	0.000109102	0.00476952	0.93,0.699	0.406,0.297	0.463
46215	ENSMUSG00000025236.11	Adpgk	chr9	+	59311289	59311730	59311605	59311730	59310227	59310348	46215	1,2	0,0	14,2	1,4	198	99	0.000214347	0.00823753	1.0,1.0	0.875,0.2	0.463
46125	ENSMUSG00000036120.10	Rfxank	chr8	-	70135290	70135772	70135290	70135614	70136209	70136290	46125	5,1	0,0	7,17	7,3	198	99	6.34066e-06	0.00043953	1.0,1.0	0.333,0.739	0.464
32842	ENSMUSG00000059939.13	9430015G10Rik	chr4	+	156116422	156116848	156116695	156116848	156113928	156114001	32842	3,3	0,0	8,2	3,1	198	99	0.000313868	0.0110125	1.0,1.0	0.571,0.5	0.465
32034	ENSMUSG00000063047.9	Zfp780b	chr7	-	27976735	27976976	27976735	27976911	27979089	27979171	32034	1,3	0,0	4,7	2,4	164	99	2.02271e-05	0.00118756	1.0,1.0	0.547,0.514	0.47
34687	ENSMUSG00000039834.17	Zfp335	chr2	-	164900277	164900643	164900277	164900515	164901417	164901530	34687	4,10	0,1	2,9	4,2	198	99	0.000540238	0.0169192	1.0,0.833	0.2,0.692	0.471
26508	ENSMUSG00000026626.11	Ppp2r5a	chr1	-	191358924	191359079	191358924	191359068	191362248	191362341	26508	3,1	3,1	0,0	3,4	110	99	0.000249749	0.00921607	0.474,0.474	0.0,0.0	0.474
5812	ENSMUSG00000067629.13	Syngap1	chr17	+	26964826	26965038	26964832	26965038	26962913	26963087	5812	14,5	0,1	8,2	5,5	105	99	2.11926e-05	0.00123755	1.0,0.825	0.601,0.274	0.475
39551	ENSMUSG00000027253.15	Lrp4	chr2	+	91485753	91485962	91485784	91485962	91481857	91481980	39551	9,6	0,1	2,1	2,1	130	99	0.000595941	0.0181279	1.0,0.82	0.432,0.432	0.478
27224	ENSMUSG00000027944.13	Hax1	chr3	-	89997519	89997997	89997519	89997980	89998527	89998780	27224	9,16	3,2	7,11	19,15	116	99	1.85564e-05	0.00110848	0.719,0.872	0.239,0.385	0.483
14558	ENSMUSG00000020782.18	Llgl2	chr11	+	115855059	115855105	115855062	115855105	115854546	115854575	14558	3,1	3,1	0,0	3,2	102	99	0.000235484	0.00887364	0.493,0.493	0.0,0.0	0.493
18917	ENSMUSG00000058729.13	Lin9	chr1	+	180641849	180641992	180641916	180641992	180641365	180641397	18917	8,10	4,1	15,10	27,32	166	99	0.000318078	0.0111197	0.544,0.856	0.249,0.157	0.497
8647	ENSMUSG00000067203.8	H2-K2	chr17	-	33978122	33978616	33978122	33978523	33978726	33978827	8647	31,24	13,12	2,0	15,12	192	99	2.86626e-11	7.92281e-09	0.551,0.508	0.064,0.0	0.498
48942	ENSMUSG00000038578.15	Susd1	chr4	-	59329462	59329721	59329462	59329659	59332936	59333033	48942	3,6	0,0	8,12	6,6	161	99	2.66219e-06	0.000211942	1.0,1.0	0.451,0.552	0.498
12797	ENSMUSG00000021385.10	Ippk	chr13	+	49449251	49449387	49449298	49449387	49446302	49446576	12797	3,1	0,0	7,5	4,4	146	99	5.62583e-06	0.000397407	1.0,1.0	0.543,0.459	0.499
14160	ENSMUSG00000020585.4	Laptm4a	chr12	+	8934091	8934286	8934198	8934286	8931627	8931748	14160	2,1	0,0	1,0	0,4	198	99	0.000116871	0.00501069	1.0,1.0	1.0,0.0	0.5
14161	ENSMUSG00000020585.4	Laptm4a	chr12	+	8934118	8934286	8934198	8934286	8931627	8931748	14161	2,1	0,0	2,0	0,4	179	99	0.00146676	0.0361916	1.0,1.0	1.0,0.0	0.5
21299	ENSMUSG00000028333.10	Anp32b	chr4	+	46469888	46470007	46469897	46470007	46468558	46468787	21299	4,2	0,0	0,3	23,0	108	99	0.000240975	0.00897414	1.0,1.0	0.0,1.0	0.5
22826	ENSMUSG00000073563.3	Csnk1g3	chr18	+	53896145	53896442	53896290	53896442	53895530	53895954	22826	8,6	2,6	0,0	9,8	198	99	2.25915e-07	2.47024e-05	0.667,0.333	0.0,0.0	0.5
39644	ENSMUSG00000025823.9	Pdia4	chr6	-	47799185	47799363	47799185	47799332	47800937	47801089	39644	4,0	0,1	0,0	1,1	130	99	0.0019589	0.0448672	1.0,0.0	0.0,0.0	0.5
40944	ENSMUSG00000041840.8	Haus1	chr18	-	77760746	77761057	77760746	77761028	77761981	77762116	40944	2,2	0,0	0,1	4,0	128	99	0.000407267	0.0135157	1.0,1.0	0.0,1.0	0.5
41080	ENSMUSG00000064181.6	Rab3ip	chr10	-	116918761	116919068	116918761	116918950	116919573	116919933	41080	3,4	0,0	0,1	2,0	198	99	0.00119564	0.0308283	1.0,1.0	0.0,1.0	0.5
44028	ENSMUSG00000035365.15	Parpbp	chr10	-	88146495	88146640	88146495	88146611	88146851	88146933	44028	2,1	0,0	0,1	3,0	128	99	0.000891169	0.0247255	1.0,1.0	0.0,1.0	0.5
44321	ENSMUSG00000014873.15	Surf2	chr2	+	26919165	26919358	26919260	26919358	26918928	26919055	44321	4,2	0,0	0,1	2,0	194	99	0.00127121	0.0323826	1.0,1.0	0.0,1.0	0.5
45311	ENSMUSG00000037519.17	Ppfia1	chr7	-	144481084	144481430	144481084	144481316	144481710	144481779	45311	13,7	0,0	1,0	0,2	198	99	0.00118128	0.0306563	1.0,1.0	1.0,0.0	0.5
48737	ENSMUSG00000032411.15	Tfdp2	chr9	+	96202321	96202764	96202624	96202764	96202155	96202188	48737	2,2	0,0	1,0	0,4	198	99	0.000116868	0.00501069	1.0,1.0	1.0,0.0	0.5
44211	ENSMUSG00000003131.7	Pafah1b2	chr9	-	45981042	45981224	45981042	45981166	45984704	45985051	44211	3,8	0,0	5,3	3,2	157	99	3.54533e-05	0.00187162	1.0,1.0	0.512,0.486	0.501
33547	ENSMUSG00000026857.9	Ntmt1	chr2	+	30820452	30820616	30820540	30820616	30819674	30819832	33547	2,1	0,0	4,7	4,2	187	99	2.8912e-06	0.000226128	1.0,1.0	0.346,0.649	0.502
37597	ENSMUSG00000067274.10	Rplp0	chr5	+	115560803	115560952	115560836	115560952	115559786	115559888	37597	6,5	0,0	4,7	4,4	132	99	1.0055e-06	9.05822e-05	1.0,1.0	0.429,0.568	0.502
23566	ENSMUSG00000071291.10	Zfp58	chr13	-	67499901	67500005	67499901	67499917	67500370	67500555	23566	3,3	0,0	11,12	13,3	187	99	4.99395e-06	0.000359621	1.0,1.0	0.309,0.679	0.506
1392	ENSMUSG00000024234.7	Mtpap	chr18	+	4383184	4383413	4383188	4383413	4379568	4379741	1392	2,1	0,0	3,1	1,3	103	99	0.000625522	0.0187816	1.0,1.0	0.742,0.243	0.508
9540	ENSMUSG00000002846.9	Timmdc1	chr16	-	38516659	38516963	38516659	38516870	38518366	38518532	9540	7,2	0,0	3,7	3,2	192	99	9.8891e-06	0.000644355	1.0,1.0	0.34,0.643	0.508
16787	ENSMUSG00000025353.5	Ormdl2	chr10	-	128820260	128820532	128820260	128820511	128821541	128821645	16787	2,3	0,1	10,3	8,11	120	99	0.000478764	0.0153948	1.0,0.712	0.508,0.184	0.51
47297	ENSMUSG00000110605.1	Gm32856	chr8	+	129281982	129282844	129282475	129282844	129281336	129281397	47297	6,6	2,2	16,17	90,83	198	99	3.96929e-06	0.0002949	0.6,0.6	0.082,0.093	0.512
47945	ENSMUSG00000032047.5	Acat1	chr9	-	53583436	53583594	53583436	53583578	53587452	53587566	47945	3,3	1,0	1,2	3,2	115	99	0.000330042	0.0114659	0.721,1.0	0.223,0.463	0.518
9987	ENSMUSG00000022515.6	Anks3	chr16	-	4957640	4958062	4957640	4957762	4960396	4960568	9987	9,3	0,0	14,12	10,5	198	99	1.84703e-06	0.000153355	1.0,1.0	0.412,0.545	0.521
32770	ENSMUSG00000070858.12	Gm1673	chr5	+	33983795	33984140	33984051	33984140	33983509	33983564	32770	1,1	0,0	20,13	13,6	198	99	8.62164e-05	0.00395148	1.0,1.0	0.435,0.52	0.522
23563	ENSMUSG00000071291.10	Zfp58	chr13	-	67499901	67499960	67499901	67499917	67500370	67500555	23563	1,1	0,0	7,9	13,3	142	99	5.25001e-06	0.000374425	1.0,1.0	0.273,0.677	0.525
23565	ENSMUSG00000071291.10	Zfp58	chr13	-	67499901	67499991	67499901	67499917	67500370	67500555	23565	4,3	0,0	12,8	13,3	173	99	3.73079e-06	0.000281409	1.0,1.0	0.346,0.604	0.525
44692	ENSMUSG00000014859.9	E2f4	chr8	+	105298071	105298384	105298284	105298384	105297716	105297875	44692	5,8	2,0	0,2	2,1	198	99	0.00155411	0.0378515	0.556,1.0	0.0,0.5	0.528
32769	ENSMUSG00000070858.12	Gm1673	chr5	+	33983719	33984153	33984051	33984153	33983509	33983564	32769	1,1	0,0	19,13	13,6	198	99	8.65235e-05	0.00395741	1.0,1.0	0.422,0.52	0.529
23564	ENSMUSG00000071291.10	Zfp58	chr13	-	67499901	67499970	67499901	67499917	67500370	67500555	23564	2,1	0,0	10,7	13,3	152	99	8.69916e-06	0.000580582	1.0,1.0	0.334,0.603	0.531
4371	ENSMUSG00000029510.15	Gpc2	chr5	-	138278214	138278537	138278214	138278454	138278838	138278997	4371	17,35	6,0	38,31	66,39	182	99	5.34638e-06	0.00038008	0.606,1.0	0.238,0.302	0.533
37109	ENSMUSG00000020718.12	Polg2	chr11	-	106777142	106777518	106777142	106777248	106779083	106779502	37109	3,4	0,0	6,2	2,2	198	99	0.00018394	0.00723773	1.0,1.0	0.6,0.333	0.533
24298	ENSMUSG00000026821.16	Ralgds	chr2	+	28549460	28549532	28549463	28549532	28549057	28549156	24298	4,3	0,2	1,1	4,2	102	99	0.00144459	0.0358469	1.0,0.593	0.195,0.327	0.535
4088	ENSMUSG00000086537.7	Nespas	chr2	-	174283255	174283424	174283255	174283406	174284459	174284665	4088	1,3	0,0	19,9	13,13	117	99	2.20455e-05	0.0012758	1.0,1.0	0.553,0.369	0.539
12128	ENSMUSG00000063506.14	Arhgap22	chr14	+	33363216	33363349	33363275	33363349	33362442	33362523	12128	2,4	0,0	2,8	3,3	158	99	3.80827e-06	0.000286768	1.0,1.0	0.295,0.626	0.539
20954	ENSMUSG00000003435.9	Supt5	chr7	-	28323892	28324018	28323892	28323982	28325717	28325784	20954	5,4	0,0	4,3	3,3	135	99	4.92068e-06	0.000354919	1.0,1.0	0.494,0.423	0.541
1377	ENSMUSG00000032633.12	Flcn	chr11	-	59795140	59795575	59795140	59795264	59795749	59795863	1377	157136	44,18	69,47	114181	198	99	0	0	0.641,0.791	0.232,0.115	0.542
35320	ENSMUSG00000032449.13	Slc25a36	chr9	-	97089701	97092605	97089701	97089876	97093076	97093177	35320	1,4	1,0	1,8	8,17	198	99	0.00121913	0.031307	0.333,1.0	0.059,0.19	0.542
5627	ENSMUSG00000024795.11	Kif20b	chr19	+	34941212	34941441	34941332	34941441	34940092	34940231	5627	131103	9,5	108143	116114	198	99	0	0	0.879,0.912	0.318,0.385	0.544
15049	ENSMUSG00000038811.13	Gngt2	chr11	+	95844975	95845140	95845055	95845140	95843811	95843895	15049	2,3	0,0	9,9	4,9	179	99	3.35566e-06	0.000256153	1.0,1.0	0.554,0.356	0.545
28317	ENSMUSG00000019467.15	Arhgef25	chr10	-	127184011	127184234	127184011	127184157	127184391	127184713	28317	3,3	0,0	8,8	6,5	176	99	3.69287e-06	0.000279496	1.0,1.0	0.429,0.474	0.548
45379	ENSMUSG00000037260.8	Hgsnat	chr8	-	25963354	25963535	25963354	25963451	25964793	25964863	45379	3,1	1,0	1,5	4,4	183	99	0.00188695	0.0435329	0.619,1.0	0.119,0.403	0.548
19853	ENSMUSG00000073733.4	Cplane2	chr4	+	141217524	141217979	141217852	141217979	141217251	141217404	19853	2,1	0,0	2,4	1,3	198	99	6.82813e-05	0.00326744	1.0,1.0	0.5,0.4	0.55
22126	ENSMUSG00000028256.16	Odf2l	chr3	+	145145829	145145926	145145875	145145926	145144311	145144416	22126	2,1	0,0	8,2	3,4	145	99	1.94162e-06	0.000160609	1.0,1.0	0.645,0.254	0.55
41108	ENSMUSG00000022120.4	Rnf219	chr14	-	104502617	104503014	104502617	104502969	104503346	104503435	41108	22,21	0,1	2,2	1,4	144	99	9.41211e-06	0.000619058	1.0,0.935	0.579,0.256	0.55
11519	ENSMUSG00000022450.6	Ndufa6	chr15	-	82350978	82351126	82350978	82351106	82354080	82354322	11519	3,4	5,0	1,0	3,6	119	99	0.000218089	0.0083597	0.333,1.0	0.217,0.0	0.558
47550	ENSMUSG00000025271.13	Pfkfb1	chrX	+	150589795	150590084	150589939	150590084	150588944	150589044	47550	8,5	0,0	28,24	15,18	198	99	7.93062e-07	7.27704e-05	1.0,1.0	0.483,0.4	0.558
45975	ENSMUSG00000038215.15	Cep44	chr8	-	56549730	56550194	56549730	56550121	56550544	56551047	45975	15,5	6,1	8,9	51,36	172	99	1.27641e-07	1.51477e-05	0.59,0.742	0.083,0.126	0.561
36338	ENSMUSG00000069020.9	Urm1	chr2	+	29842461	29842546	29842464	29842546	29841401	29841483	36338	3,1	0,0	5,9	6,12	102	99	6.3132e-06	0.000438309	1.0,1.0	0.447,0.421	0.566
17684	ENSMUSG00000020198.8	Ap3d1	chr10	-	80708746	80708980	80708746	80708920	80709200	80709286	17684	2,1	0,0	3,2	2,2	159	99	8.90812e-05	0.00404529	1.0,1.0	0.483,0.384	0.567
33224	ENSMUSG00000026955.13	Sapcd2	chr2	+	25375557	25375831	25375732	25375831	25375020	25375064	33224	3,2	0,0	7,4	4,3	198	99	5.09686e-06	0.000365258	1.0,1.0	0.467,0.4	0.567
48104	ENSMUSG00000032306.14	Mpi	chr9	-	57546393	57546595	57546393	57546517	57548527	57548710	48104	3,11	0,0	12,9	10,6	177	99	2.89712e-07	3.05965e-05	1.0,1.0	0.402,0.456	0.571
12162	ENSMUSG00000021816.11	Ppp3cb	chr14	-	20523778	20524091	20523778	20523856	20524356	20524502	12162	7,6	0,0	11,2	5,2	198	99	6.57243e-07	6.26323e-05	1.0,1.0	0.524,0.333	0.572
28108	ENSMUSG00000039046.15	Usp6nl	chr2	+	6400053	6400319	6400279	6400319	6391054	6391122	28108	9,6	1,2	4,1	15,3	198	99	1.97735e-05	0.00116708	0.818,0.6	0.118,0.143	0.579
20275	ENSMUSG00000033253.18	Szt2	chr4	-	118388543	118388714	118388543	118388644	118388922	118389036	20275	3,2	0,0	18,7	6,16	169	99	3.57601e-06	0.000271576	1.0,1.0	0.637,0.204	0.58
9013	ENSMUSG00000079641.3	Rpl39	chrX	-	37083984	37084240	37083984	37084125	37085124	37085402	9013	24,16	0,0	4,2	2,2	198	99	5.52519e-05	0.00273512	1.0,1.0	0.5,0.333	0.584
2458	ENSMUSG00000028439.14	Fam219a	chr4	-	41517690	41520398	41517690	41520395	41520911	41520966	2458	4,2	0,0	2,1	2,2	102	99	0.000125195	0.0053012	1.0,1.0	0.493,0.327	0.59
34251	ENSMUSG00000011831.16	Evi5	chr5	-	107819589	107819744	107819589	107819678	107821704	107821894	34251	5,3	0,0	9,3	4,6	165	99	3.44793e-07	3.56845e-05	1.0,1.0	0.574,0.231	0.598
9014	ENSMUSG00000079641.3	Rpl39	chrX	-	37083984	37084360	37083984	37084125	37085124	37085402	9014	4,6	0,0	6,1	2,2	198	99	0.000114302	0.00492428	1.0,1.0	0.6,0.2	0.6
12286	ENSMUSG00000094870.8	Zfp131	chr13	-	119789643	119789876	119789643	119789872	119790148	119790738	12286	2,5	3,1	0,0	2,1	103	99	1.12614e-06	9.94377e-05	0.391,0.828	0.0,0.0	0.609
14718	ENSMUSG00000020687.13	Cdc27	chr11	-	104528262	104528490	104528262	104528377	104528577	104528732	14718	1,2	1,0	0,1	2,4	198	99	0.000431588	0.014154	0.333,1.0	0.0,0.111	0.611
27023	ENSMUSG00000037533.19	Rapgef6	chr11	+	54687543	54687654	54687588	54687654	54683891	54684026	27023	2,2	0,1	1,2	3,7	144	99	0.00037007	0.012535	1.0,0.579	0.186,0.164	0.615
33629	ENSMUSG00000017307.16	Acot8	chr2	-	164794984	164795235	164794984	164795110	164795651	164796489	33629	3,3	0,0	3,1	2,1	198	99	0.000413293	0.0136749	1.0,1.0	0.429,0.333	0.619
4987	ENSMUSG00000042826.13	Fgf11	chr11	-	69798563	69798762	69798563	69798678	69799351	69799455	4987	2,1	0,0	5,3	4,3	183	99	3.89341e-06	0.000291207	1.0,1.0	0.403,0.351	0.623
34395	ENSMUSG00000045100.11	Slc25a26	chr6	+	94550238	94550605	94550490	94550605	94549039	94549195	34395	4,4	1,0	3,1	4,3	198	99	7.26081e-05	0.00342296	0.667,1.0	0.273,0.143	0.625
12164	ENSMUSG00000021816.11	Ppp3cb	chr14	-	20523778	20524127	20523778	20523856	20524356	20524502	12164	7,6	0,0	7,2	5,2	198	99	5.90925e-07	5.74116e-05	1.0,1.0	0.412,0.333	0.627
47021	ENSMUSG00000031818.12	Cox4i1	chr8	+	120672704	120672885	120672738	120672885	120669308	120669382	47021	2,2	0,1	2,0	3,3	133	99	0.000103836	0.00459053	1.0,0.598	0.332,0.0	0.633
19313	ENSMUSG00000006205.13	Htra1	chr7	+	130983656	130983755	130983659	130983755	130982729	130982781	19313	5,10	0,0	3,4	5,7	102	99	1.82693e-08	2.61428e-06	1.0,1.0	0.368,0.357	0.637
28109	ENSMUSG00000039046.15	Usp6nl	chr2	+	6400074	6400319	6400279	6400319	6391054	6391122	28109	13,8	1,2	4,1	15,3	198	99	5.94681e-07	5.75328e-05	0.867,0.667	0.118,0.143	0.637
27588	ENSMUSG00000018501.17	Ncor1	chr11	-	62433562	62433689	62433562	62433659	62438337	62438515	27588	3,1	0,2	0,0	3,5	129	99	0.000323774	0.0112923	1.0,0.277	0.0,0.0	0.639
40370	ENSMUSG00000049555.10	Tmie	chr9	-	110873795	110874101	110873795	110874098	110875627	110876021	40370	7,3	2,0	2,0	2,3	102	99	0.000550568	0.0171715	0.773,1.0	0.493,0.0	0.64
10102	ENSMUSG00000023015.14	Racgap1	chr15	-	99623926	99624341	99623926	99624334	99626182	99626381	10102	8,1	3,0	1,2	3,8	106	99	0.00128209	0.0325297	0.714,1.0	0.237,0.189	0.644
38762	ENSMUSG00000025199.16	Chuk	chr19	-	44078888	44079278	44078888	44079216	44081945	44081995	38762	2,6	3,0	0,0	1,1	161	99	9.11318e-06	0.000604417	0.291,1.0	0.0,0.0	0.645
34953	ENSMUSG00000086537.7	Nespas	chr2	-	174283255	174283437	174283255	174283406	174284459	174284665	34953	1,3	0,0	12,7	13,13	130	99	1.02051e-05	0.000657005	1.0,1.0	0.413,0.291	0.648
12907	ENSMUSG00000069259.10	Prl6a1	chr13	+	27315278	27315457	27315281	27315457	27312626	27312692	12907	3,1	0,0	7,0	3,4	102	99	5.85984e-06	0.000411325	1.0,1.0	0.694,0.0	0.653
44059	ENSMUSG00000032332.17	Col12a1	chr9	-	79714904	79715152	79714904	79715059	79715363	79715471	44059	41,43	5,9	0,1	5,2	192	99	1.05107e-07	1.27454e-05	0.809,0.711	0.0,0.205	0.657
2796	ENSMUSG00000009575.14	Cbx5	chr15	-	103215021	103215125	103215021	103215121	103239732	103239816	2796	5,1	0,0	13,8	23,16	103	99	7.12598e-07	6.69045e-05	1.0,1.0	0.352,0.325	0.661
9011	ENSMUSG00000079641.3	Rpl39	chrX	-	37083984	37084360	37083984	37084108	37085124	37085402	9011	4,6	0,0	6,1	2,6	198	99	1.12892e-07	1.35419e-05	1.0,1.0	0.6,0.077	0.661
46658	ENSMUSG00000029034.9	Ints11	chr4	+	155875179	155875366	155875228	155875366	155872849	155872923	46658	4,5	5,0	0,1	15,27	148	99	2.23158e-06	0.00018189	0.349,1.0	0.0,0.024	0.662
30190	ENSMUSG00000026516.8	Nvl	chr1	-	181112287	181112682	181112287	181112411	181114082	181114301	30190	2,1	0,1	0,0	1,3	198	99	0.000555871	0.0172751	1.0,0.333	0.0,0.0	0.666
47790	ENSMUSG00000021273.11	Fdft1	chr14	-	63159237	63159681	63159237	63159397	63163301	63163485	47790	2,4	0,1	0,1	1,1	198	99	1.23115e-05	0.000777161	1.0,0.667	0.0,0.333	0.667
29441	ENSMUSG00000037022.3	Mmaa	chr8	-	79284208	79284446	79284208	79284418	79294913	79294937	29441	2,1	0,0	0,5	2,2	127	99	0.00017408	0.00692941	1.0,1.0	0.0,0.661	0.669
29543	ENSMUSG00000034799.16	Unc13a	chr8	-	71660340	71660832	71660340	71660649	71661818	71661851	29543	78,52	13,7	5,5	19,29	198	99	0	0	0.75,0.788	0.116,0.079	0.671
31723	ENSMUSG00000029432.12	Nipsnap2	chr5	+	129754681	129754863	129754771	129754863	129753229	129753320	31723	2,1	0,1	0,0	1,5	189	99	0.000451477	0.0146658	1.0,0.344	0.0,0.0	0.672
9010	ENSMUSG00000079641.3	Rpl39	chrX	-	37083984	37084240	37083984	37084108	37085124	37085402	9010	24,16	0,0	4,2	2,6	198	99	3.11953e-09	5.42299e-07	1.0,1.0	0.5,0.143	0.678
34550	ENSMUSG00000044308.17	Ubr3	chr2	+	70000255	70000543	70000457	70000543	69999084	69999218	34550	6,8	0,0	5,3	3,7	198	99	7.35808e-09	1.16533e-06	1.0,1.0	0.455,0.176	0.684
35306	ENSMUSG00000040479.11	Dgkz	chr2	-	91939909	91940405	91939909	91940339	91940604	91940676	35306	2,4	0,0	2,3	3,4	165	99	6.8018e-07	6.42676e-05	1.0,1.0	0.286,0.31	0.702
9012	ENSMUSG00000079641.3	Rpl39	chrX	-	37083984	37084171	37083984	37084125	37085124	37085402	9012	3,6	0,0	4,0	2,2	145	99	4.58584e-05	0.00233238	1.0,1.0	0.577,0.0	0.712
14504	ENSMUSG00000020776.18	Fbf1	chr11	-	116157688	116157902	116157688	116157785	116158888	116158939	14504	2,1	0,0	6,1	4,3	198	99	3.26483e-08	4.42972e-06	1.0,1.0	0.429,0.143	0.714
28657	ENSMUSG00000025050.8	Pcgf6	chr19	-	47047946	47048037	47047946	47048029	47048107	47048163	28657	4,2	0,1	0,2	9,7	107	99	6.15843e-07	5.93222e-05	1.0,0.649	0.0,0.209	0.72
17449	ENSMUSG00000040312.14	Cchcr1	chr17	+	35517767	35517939	35517790	35517939	35517175	35517229	17449	1,2	1,0	0,0	3,2	122	99	6.36321e-05	0.00307472	0.448,1.0	0.0,0.0	0.724
9009	ENSMUSG00000079641.3	Rpl39	chrX	-	37083984	37084171	37083984	37084108	37085124	37085402	9009	3,6	0,0	4,0	2,6	162	99	2.83633e-08	3.92004e-06	1.0,1.0	0.55,0.0	0.725
32358	ENSMUSG00000030269.14	Mtmr14	chr6	+	113277794	113277945	113277830	113277945	113270521	113270701	32358	3,7	0,0	1,1	1,5	135	99	5.95095e-09	9.56084e-07	1.0,1.0	0.423,0.128	0.725
35331	ENSMUSG00000025010.14	Ccnj	chr19	+	40845077	40845204	40845080	40845204	40844659	40844959	35331	1,2	0,0	5,0	4,7	102	99	1.49927e-07	1.74209e-05	1.0,1.0	0.548,0.0	0.726
18832	ENSMUSG00000079562.7	Maea	chr5	+	33362653	33362817	33362725	33362817	33360369	33360555	18832	12,5	0,0	3,7	7,8	171	99	2.92339e-09	5.12202e-07	1.0,1.0	0.199,0.336	0.732
11729	ENSMUSG00000022325.14	Pop1	chr15	+	34510118	34510425	34510287	34510425	34509906	34510019	11729	3,1	0,0	2,1	2,2	198	99	3.85933e-06	0.000289145	1.0,1.0	0.333,0.2	0.734
28967	ENSMUSG00000029319.8	Coq2	chr5	-	100663579	100663900	100663579	100663693	100673988	100674284	28967	39,37	0,0	5,3	10,3	198	99	6.11733e-14	2.34689e-11	1.0,1.0	0.2,0.333	0.734
36197	ENSMUSG00000055681.14	Cope	chr8	+	70306292	70306417	70306361	70306417	70305697	70305735	36197	7,3	0,2	0,0	3,1	168	99	1.02745e-07	1.24959e-05	1.0,0.469	0.0,0.0	0.734
11883	ENSMUSG00000037526.7	Atg14	chr14	-	47554559	47554814	47554559	47554711	47559173	47559216	11883	4,1	2,0	0,0	4,2	198	99	0.000157718	0.00639245	0.5,1.0	0.0,0.0	0.75
11884	ENSMUSG00000037526.7	Atg14	chr14	-	47554559	47554817	47554559	47554711	47559173	47559216	11884	4,2	2,0	0,0	4,2	198	99	3.96618e-06	0.0002949	0.5,1.0	0.0,0.0	0.75
22585	ENSMUSG00000028614.14	Ndc1	chr4	+	107390224	107390605	107390548	107390605	107389450	107389606	22585	4,1	0,0	5,5	7,8	198	99	7.51485e-07	6.98191e-05	1.0,1.0	0.263,0.238	0.75
24909	ENSMUSG00000025702.15	2022-03-08	chr6	+	116401336	116402182	116401773	116402182	116401036	116401122	24909	11,9	0,0	0,8	6,4	198	99	8.14096e-09	1.27122e-06	1.0,1.0	0.0,0.5	0.75
32778	ENSMUSG00000031807.10	Pgls	chr8	+	71599868	71600195	71600069	71600195	71599077	71599208	32778	1,4	0,0	9,7	12,12	198	99	3.07976e-06	0.000237126	1.0,1.0	0.273,0.226	0.75
40426	ENSMUSG00000059439.15	Bcas3	chr11	+	85821775	85822112	85822021	85822112	85813999	85814065	40426	4,2	0,1	0,0	1,3	198	99	6.37384e-08	8.10443e-06	1.0,0.5	0.0,0.0	0.75
41900	ENSMUSG00000004460.17	Dnajb11	chr16	+	22871908	22872306	22872139	22872306	22871670	22871763	41900	1,2	0,0	6,1	15,1	198	99	3.10606e-07	3.2593e-05	1.0,1.0	0.167,0.333	0.75
2239	ENSMUSG00000030231.11	Plekha5	chr6	+	140579426	140579476	140579429	140579476	140572864	140572966	2239	1,2	0,0	2,0	2,1	102	99	0.00154526	0.0377229	1.0,1.0	0.493,0.0	0.754
29391	ENSMUSG00000056167.7	Cnot10	chr9	-	114596604	114597081	114596604	114596671	114597478	114598835	29391	4,3	0,1	1,0	5,6	198	99	1.09135e-07	1.31979e-05	1.0,0.6	0.091,0.0	0.755
23449	ENSMUSG00000028059.15	Arhgef2	chr3	+	88616349	88616654	88616560	88616654	88615481	88615521	23449	9,5	0,1	5,1	15,12	198	99	9.56611e-09	1.46296e-06	1.0,0.714	0.143,0.04	0.765
47600	ENSMUSG00000021704.8	Mtx3	chr13	+	92849329	92849523	92849424	92849523	92848917	92849075	47600	2,1	0,0	3,4	5,7	194	99	7.18314e-07	6.72992e-05	1.0,1.0	0.234,0.226	0.77
25849	ENSMUSG00000026708.16	Cenpl	chr1	+	161078232	161078480	161078338	161078480	161074756	161074930	25849	2,2	0,0	2,1	7,1	198	99	1.77455e-10	4.13469e-08	1.0,1.0	0.125,0.333	0.771
29803	ENSMUSG00000025212.17	Sfxn3	chr19	+	45050050	45050326	45050231	45050326	45049743	45049914	29803	1,1	0,0	8,0	5,2	198	99	1.72396e-07	1.96218e-05	1.0,1.0	0.444,0.0	0.778
8060	ENSMUSG00000049411.15	Tmem241	chr18	-	12065536	12065801	12065536	12065770	12067059	12067105	8060	1,1	0,0	0,1	1,1	130	99	0.00101964	0.0272862	1.0,1.0	0.0,0.432	0.784
9697	ENSMUSG00000022843.17	Clcn2	chr16	-	20711689	20712169	20711689	20712136	20712311	20712787	9697	5,1	0,0	5,11	16,27	132	99	2.33941e-07	2.53929e-05	1.0,1.0	0.19,0.234	0.788
33164	ENSMUSG00000058355.8	Abce1	chr8	-	79690236	79690422	79690236	79690380	79693423	79693545	33164	1,1	0,0	0,1	1,1	141	99	0.000788252	0.0223722	1.0,1.0	0.0,0.413	0.793
14623	ENSMUSG00000057322.12	Rpl38	chr11	+	114671702	114671788	114671741	114671788	114668905	114668966	14623	1,2	0,1	0,0	3,1	138	99	8.80098e-05	0.0040089	1.0,0.589	0.0,0.0	0.794
35234	ENSMUSG00000020064.9	Herc4	chr10	+	63283184	63283341	63283212	63283341	63278402	63278465	35234	1,2	0,0	1,2	3,6	127	99	2.55096e-07	2.7331e-05	1.0,1.0	0.206,0.206	0.794
13195	ENSMUSG00000002799.6	Jag2	chr12	-	112920071	112920480	112920071	112920432	112921999	112922057	13195	3,4	0,0	0,1	1,1	147	99	0.000689605	0.0202037	1.0,1.0	0.0,0.402	0.799
43975	ENSMUSG00000001089.14	Luzp1	chr4	+	136545206	136545402	136545240	136545402	136540355	136543518	43975	1,2	0,0	1,1	3,3	133	99	2.11098e-07	2.34862e-05	1.0,1.0	0.199,0.199	0.801
46446	ENSMUSG00000012889.8	Podnl1	chr8	+	84128471	84128726	84128569	84128726	84127227	84127321	46446	2,3	0,0	6,0	5,8	197	99	1.00395e-08	1.51968e-06	1.0,1.0	0.376,0.0	0.812
28397	ENSMUSG00000028741.13	Mrto4	chr4	-	139349613	139349847	139349613	139349772	139350435	139350494	28397	3,1	0,0	0,2	3,2	174	99	6.71908e-09	1.07175e-06	1.0,1.0	0.0,0.363	0.819
36754	ENSMUSG00000024359.10	Hspa9	chr18	-	34938266	34938418	34938266	34938407	34938583	34938724	36754	1,2	0,1	0,0	1,2	110	99	3.28486e-05	0.00175494	1.0,0.643	0.0,0.0	0.822
22084	ENSMUSG00000030231.11	Plekha5	chr6	+	140576961	140577338	140577228	140577338	140572864	140572966	22084	1,3	0,0	0,2	6,2	198	99	2.04057e-11	5.89684e-09	1.0,1.0	0.0,0.333	0.834
28181	ENSMUSG00000038702.6	Dsel	chr1	-	111863237	111863636	111863237	111863506	111864094	111864918	28181	2,2	0,0	2,0	2,7	198	99	1.82326e-11	5.3382e-09	1.0,1.0	0.333,0.0	0.834
44063	ENSMUSG00000032332.17	Col12a1	chr9	-	79714904	79715152	79714904	79715119	79715363	79715471	44063	41,43	0,2	0,1	2,2	132	99	1.87799e-07	2.11051e-05	1.0,0.942	0.0,0.273	0.835
22525	ENSMUSG00000033400.14	Agl	chr3	-	116781242	116781344	116781242	116781339	116782519	116782643	22525	4,4	0,0	2,0	4,1	104	99	3.66955e-07	3.74555e-05	1.0,1.0	0.322,0.0	0.839
41739	ENSMUSG00000003865.16	Gys1	chr7	+	45447903	45448011	45447916	45448011	45444778	45444857	41739	19,7	0,0	0,1	1,2	112	99	1.22991e-05	0.000777161	1.0,1.0	0.0,0.307	0.847
14393	ENSMUSG00000057265.13	Bbof1	chr12	+	84425135	84425280	84425190	84425280	84423432	84423503	14393	4,6	0,0	1,0	2,1	154	99	3.19782e-06	0.000245366	1.0,1.0	0.243,0.0	0.879
46932	ENSMUSG00000031753.16	Cog4	chr8	+	110868101	110868367	110868239	110868367	110866560	110866727	46932	8,2	0,0	1,4	13,8	198	99	5.68253e-10	1.18173e-07	1.0,1.0	0.037,0.2	0.881
9609	ENSMUSG00000022801.13	Lrch3	chr16	+	32988425	32988481	32988433	32988481	32986738	32986888	9609	2,2	0,0	1,1	9,7	107	99	9.03555e-09	1.39621e-06	1.0,1.0	0.093,0.117	0.895
6340	ENSMUSG00000010476.14	Ebf3	chr7	-	137198491	137198689	137198491	137198581	137200382	137200560	6340	2,2	0,0	1,0	2,2	198	99	5.39942e-09	8.89964e-07	1.0,1.0	0.2,0.0	0.9
31932	ENSMUSG00000026193.15	Fn1	chr1	-	71593070	71593510	71593070	71593231	71595663	71595802	31932	19,17	1,1	0,0	3,1	198	99	1.8224e-09	3.31029e-07	0.905,0.895	0.0,0.0	0.9
33101	ENSMUSG00000026087.11	Mrpl30	chr1	+	37891816	37892172	37891819	37892172	37890532	37890584	33101	7,2	1,0	0,0	1,1	102	99	1.56684e-10	3.66995e-08	0.872,1.0	0.0,0.0	0.936
36336	ENSMUSG00000069020.9	Urm1	chr2	+	29842105	29842546	29842464	29842546	29841401	29841483	36336	1,1	0,0	1,0	6,12	198	99	9.83551e-09	1.49389e-06	1.0,1.0	0.077,0.0	0.962
4400	ENSMUSG00000064141.14	Zfp69	chr4	-	120934332	120934431	120934332	120934428	120935066	120935193	4400	2,1	0,0	0,0	4,1	102	99	1.34479e-09	2.54668e-07	1.0,1.0	0.0,0.0	1
7356	ENSMUSG00000056629.16	Fkbp2	chr19	-	6978972	6979208	6978972	6979082	6979313	6980250	7356	2,1	0,0	0,0	2,1	198	99	3.9232e-09	6.66389e-07	1.0,1.0	0.0,0.0	1
10525	ENSMUSG00000060036.14	Rpl3	chr15	-	80080717	80081177	80080717	80081110	80081614	80081783	10525	1,2	0,0	0,0	2,1	166	99	4.55184e-09	7.61543e-07	1.0,1.0	0.0,0.0	1
11421	ENSMUSG00000022098.10	Bmp1	chr14	-	70488469	70488832	70488469	70488590	70490019	70490200	11421	1,1	0,0	0,0	1,3	198	99	7.86416e-09	1.23232e-06	1.0,1.0	0.0,0.0	1
13687	ENSMUSG00000056258.9	Kcnq3	chr15	-	66005771	66005974	66005771	66005885	66016448	66016475	13687	2,1	0,0	0,0	2,1	188	99	4.11566e-09	6.96423e-07	1.0,1.0	0.0,0.0	1
15638	ENSMUSG00000018442.13	Derl2	chr11	-	71018311	71018586	71018311	71018504	71019143	71019303	15638	6,1	0,0	0,0	4,5	181	99	9.48652e-12	2.85256e-09	1.0,1.0	0.0,0.0	1
22268	ENSMUSG00000028165.9	Cisd2	chr3	-	135422498	135422990	135422498	135422581	135423258	135423925	22268	3,1	0,0	0,0	3,3	198	99	5.00012e-10	1.0546e-07	1.0,1.0	0.0,0.0	1
22650	ENSMUSG00000068744.12	Psrc1	chr3	+	108387109	108387395	108387291	108387395	108386499	108386736	22650	1,1	0,0	0,0	2,1	198	99	5.94589e-09	9.56084e-07	1.0,1.0	0.0,0.0	1
33744	ENSMUSG00000038900.17	Rpl12	chr2	+	32963455	32963853	32963751	32963853	32962984	32963066	33744	1,1	0,0	0,0	1,2	198	99	5.94589e-09	9.56084e-07	1.0,1.0	0.0,0.0	1
36918	ENSMUSG00000047409.13	Ctdspl	chr9	+	118929660	118929932	118929860	118929932	118926861	118926940	36918	3,4	0,0	0,0	4,1	198	99	8.65762e-11	2.18915e-08	1.0,1.0	0.0,0.0	1
44626	ENSMUSG00000020827.18	Mink1	chr11	+	70609900	70610181	70610039	70610181	70609553	70609717	44626	1,6	0,0	0,0	3,3	198	99	2.94141e-11	8.08035e-09	1.0,1.0	0.0,0.0	1
46205	ENSMUSG00000004264.17	Phb2	chr6	+	124715769	124716030	124715860	124716030	124715581	124715659	46205	1,1	0,0	0,0	2,2	190	99	2.17589e-09	3.88891e-07	1.0,1.0	0.0,0.0	1
48510	ENSMUSG00000005505.12	Kbtbd4	chr2	+	90905418	90905617	90905440	90905617	90904768	90904909	48510	1,1	0,0	0,0	5,2	121	99	3.118e-09	5.42299e-07	1.0,1.0	0.0,0.0	1
48968	ENSMUSG00000032582.14	Rbm6	chr9	-	107789607	107789724	107789607	107789701	107791004	107791165	48968	4,3	0,0	0,0	2,1	122	99	4.99366e-10	1.0546e-07	1.0,1.0	0.0,0.0	1
49048	ENSMUSG00000025650.13	Col7a1	chr9	+	108957219	108957326	108957224	108957326	108956986	108957136	49048	4,1	0,0	0,0	2,5	104	99	8.27517e-11	2.1044e-08	1.0,1.0	0.0,0.0	1
49202	ENSMUSG00000038775.14	Vill	chr9	+	119070560	119070806	119070574	119070806	119070277	119070349	49202	1,2	0,0	0,0	2,4	113	99	5.65646e-10	1.18173e-07	1.0,1.0	0.0,0.0	1

## Sheet: A5SS
ID	GeneID	geneSymbol	chr	strand	longExonStart_0base	longExonEnd	shortES	shortEE	flankingES	flankingEE	ID.1	IJC_SAMPLE_1	SJC_SAMPLE_1	IJC_SAMPLE_2	SJC_SAMPLE_2	IncFormLen	SkipFormLen	PValue	FDR	IncLevel1	IncLevel2	IncLevelDifference
6680	ENSMUSG00000033047.5	Eif3l	chr15	+	79075178	79075646	79075178	79075303	79075770	79075819	6680	0,0	4,1	1,2	0,0	198	99	1.79498e-09	1.92588e-07	0.0,0.0	1.0,1.0	-1
8912	ENSMUSG00000060073.9	Psma3	chr12	+	70974620	70974957	70974620	70974771	70978732	70979694	8912	0,0	1,1	2,2	0,0	198	99	7.77576e-09	7.23536e-07	0.0,0.0	1.0,1.0	-1
16853	ENSMUSG00000045294.11	Insig1	chr5	+	28074481	28074924	28074481	28074638	28075061	28075161	16853	0,0	3,1	6,11	0,0	198	99	1.6133e-11	2.70691e-09	0.0,0.0	1.0,1.0	-1
19338	ENSMUSG00000059995.12	Atxn7l3	chr11	-	102294074	102294163	102294076	102294163	102293843	102293941	19338	0,0	2,2	1,1	0,0	101	99	5.43839e-09	5.27841e-07	0.0,0.0	1.0,1.0	-1
19650	ENSMUSG00000087174.7	5530601H04Rik	chrX	-	105070004	105070042	105070041	105070042	105069610	105069675	19650	0,0	1,2	1,1	0,0	136	99	8.93344e-09	8.26383e-07	0.0,0.0	1.0,1.0	-1
22442	ENSMUSG00000040018.9	Cox15	chr19	-	43752567	43753000	43752571	43753000	43751343	43751534	22442	0,0	1,1	3,1	0,0	103	99	5.77332e-09	5.53537e-07	0.0,0.0	1.0,1.0	-1
23238	ENSMUSG00000022708.16	Zbtb20	chr16	+	43193464	43193857	43193464	43193538	43232758	43232820	23238	0,0	1,2	2,1	0,0	198	99	3.9232e-09	3.92868e-07	0.0,0.0	1.0,1.0	-1
25155	ENSMUSG00000055943.5	Emc7	chr2	+	112454996	112455454	112454996	112455170	112459459	112459579	25155	0,0	2,1	2,1	0,0	198	99	3.9232e-09	3.92868e-07	0.0,0.0	1.0,1.0	-1
25592	ENSMUSG00000077450.13	Rab11b	chr17	-	33760042	33760063	33760052	33760063	33749781	33749977	25592	0,0	2,2	5,2	0,0	109	99	1.97681e-10	2.66481e-08	0.0,0.0	1.0,1.0	-1
27802	ENSMUSG00000032562.13	Gnai2	chr9	-	107626503	107626606	107626549	107626606	107620419	107620462	27802	0,0	7,1	1,2	0,0	145	99	7.53985e-10	8.80878e-08	0.0,0.0	1.0,1.0	-1
30717	ENSMUSG00000074182.8	Znhit6	chr3	+	145576273	145576772	145576273	145576407	145576850	145576996	30717	0,0	4,1	1,3	0,0	198	99	3.00259e-10	3.85015e-08	0.0,0.0	1.0,1.0	-1
32958	ENSMUSG00000031838.8	Ifi30	chr8	-	70765943	70766304	70766201	70766304	70764919	70765102	32958	0,0	1,7	3,1	0,0	198	99	2.7981e-10	3.63223e-08	0.0,0.0	1.0,1.0	-1
33630	ENSMUSG00000006517.5	Mvd	chr8	-	122439955	122440058	122440043	122440058	122439637	122439752	33630	0,0	1,2	1,2	0,0	187	99	4.13519e-09	4.11484e-07	0.0,0.0	1.0,1.0	-1
35395	ENSMUSG00000020063.16	Sirt1	chr10	-	63321651	63322139	63321763	63322139	63319057	63320964	35395	0,0	2,3	1,1	0,0	198	99	4.6179e-09	4.56637e-07	0.0,0.0	1.0,1.0	-1
21951	ENSMUSG00000060798.7	Intu	chr3	+	40687775	40688144	40687775	40687829	40691714	40691936	21951	0,1	7,6	1,1	0,0	198	99	2.43195e-09	2.54862e-07	0.0,0.077	1.0,1.0	-0.962
10790	ENSMUSG00000049321.17	Zfp2	chr11	-	50906085	50906157	50906089	50906157	50905605	50905686	10790	0,0	1,2	12,12	0,1	103	99	1.06069e-09	1.19494e-07	0.0,0.0	1.0,0.92	-0.96
33132	ENSMUSG00000027007.16	Itprid2	chr2	+	79636032	79636301	79636032	79636078	79640145	79640202	33132	1,6	34,32	10,2	0,0	198	99	6.82787e-14	1.56071e-11	0.014,0.086	1.0,1.0	-0.95
5244	ENSMUSG00000023944.14	Hsp90ab1	chr17	-	45572782	45573253	45573039	45573253	45571878	45571911	5244	2,0	8,7	4,8	0,0	198	99	1.69031e-12	3.35341e-10	0.111,0.0	1.0,1.0	-0.945
19119	ENSMUSG00000039128.13	Cdc123	chr2	-	5795531	5795686	5795543	5795686	5794664	5794880	19119	0,0	1,1	1,9	0,1	111	99	4.76284e-10	5.77842e-08	0.0,0.0	1.0,0.889	-0.945
23578	ENSMUSG00000031711.7	Zfp330	chr8	-	82772817	82773007	82772879	82773007	82769319	82769399	23578	2,2	24,18	4,4	0,0	161	99	3.34658e-11	5.22596e-09	0.049,0.064	1.0,1.0	-0.944
7536	ENSMUSG00000037544.14	Dlgap5	chr14	-	47407582	47407911	47407651	47407911	47406338	47406418	7536	0,1	3,4	1,3	0,0	168	99	1.15136e-11	1.98461e-09	0.0,0.128	1.0,1.0	-0.936
23018	ENSMUSG00000030699.16	Tbx6	chr7	+	126783429	126783727	126783429	126783500	126784536	126784610	23018	2,0	4,1	6,1	0,0	198	99	3.74302e-09	3.79645e-07	0.2,0.0	1.0,1.0	-0.9
11474	ENSMUSG00000022994.9	Adcy6	chr15	-	98600143	98600289	98600171	98600289	98599899	98600027	11474	1,2	9,10	3,1	0,0	127	99	3.42718e-08	2.85998e-06	0.08,0.135	1.0,1.0	-0.892
32956	ENSMUSG00000031838.8	Ifi30	chr8	-	70765860	70766304	70766201	70766304	70764919	70765102	32956	0,4	1,7	35,37	0,0	198	99	2.99017e-11	4.7398e-09	0.0,0.222	1.0,1.0	-0.889
6684	ENSMUSG00000033047.5	Eif3l	chr15	+	79075257	79075360	79075257	79075303	79075770	79075819	6684	2,0	4,1	2,5	0,0	156	99	1.81736e-08	1.60579e-06	0.241,0.0	1.0,1.0	-0.879
2623	ENSMUSG00000044976.17	Wdr72	chr9	+	74148201	74148383	74148201	74148347	74148720	74148817	2623	0,0	2,3	4,5	1,0	135	99	6.30677e-11	9.25305e-09	0.0,0.0	0.746,1.0	-0.873
16184	ENSMUSG00000060671.12	Atp8b2	chr3	-	89958015	89958387	89958288	89958387	89957297	89957368	16184	3,6	18,12	12,15	0,0	198	99	5.44009e-15	1.40658e-12	0.077,0.2	1.0,1.0	-0.861
13082	ENSMUSG00000057367.12	Birc2	chr9	-	7836694	7836805	7836748	7836805	7834783	7835379	13082	1,0	3,2	49,33	0,3	153	99	1.62085e-08	1.44429e-06	0.177,0.0	1.0,0.877	-0.85
8278	ENSMUSG00000047879.17	Usp14	chr18	-	10029638	10030081	10029912	10030081	10017990	10018095	8278	0,0	4,1	1,4	0,1	198	99	3.62106e-07	2.33108e-05	0.0,0.0	1.0,0.667	-0.834
10495	ENSMUSG00000020898.18	Ctc1	chr11	+	69015910	69016189	69015910	69016077	69021029	69022614	10495	0,2	2,2	2,6	0,0	198	99	2.84965e-07	1.87661e-05	0.0,0.333	1.0,1.0	-0.834
20642	ENSMUSG00000034349.14	Smc4	chr3	+	69004969	69005415	69004969	69005095	69006075	69006224	20642	0,3	12,3	6,6	0,0	198	99	6.90091e-11	1.00314e-08	0.0,0.333	1.0,1.0	-0.834
34207	ENSMUSG00000037287.15	Tbcel	chr9	-	42471893	42472258	42472065	42472258	42444406	42444588	34207	11,7	24,20	5,3	0,0	198	99	5.00926e-08	4.03092e-06	0.186,0.149	1.0,1.0	-0.833
13207	ENSMUSG00000029022.18	Miip	chr4	-	147868374	147868483	147868391	147868483	147866234	147866419	13207	0,0	6,4	4,4	2,0	116	99	3.49628e-09	3.5924e-07	0.0,0.0	0.631,1.0	-0.816
29035	ENSMUSG00000063870.12	Chd4	chr6	+	125096568	125096991	125096568	125096971	125097086	125097371	29035	0,5	1,7	1,3	0,0	119	99	3.76361e-07	2.4081e-05	0.0,0.373	1.0,1.0	-0.814
3064	ENSMUSG00000038784.13	Cnot4	chr6	-	35064888	35065022	35064897	35065022	35052841	35053091	3064	0,4	3,6	2,2	0,0	108	99	3.38381e-08	2.84637e-06	0.0,0.379	1.0,1.0	-0.81
12393	ENSMUSG00000036323.14	Srp72	chr5	+	76994627	76995094	76994627	76994731	76995777	76995915	12393	0,5	1,4	32,21	0,0	198	99	9.40369e-07	5.41296e-05	0.0,0.385	1.0,1.0	-0.807
34208	ENSMUSG00000037287.15	Tbcel	chr9	-	42471998	42472258	42472065	42472258	42444406	42444588	34208	13,6	24,20	5,3	0,0	166	99	5.48621e-08	4.38696e-06	0.244,0.152	1.0,1.0	-0.802
13802	ENSMUSG00000001323.17	Srr	chr11	-	74925275	74925682	74925583	74925682	74919436	74919662	13802	0,0	2,10	3,1	1,0	198	99	1.07515e-05	0.000458923	0.0,0.0	0.6,1.0	-0.8
16300	ENSMUSG00000046186.8	Cd109	chr9	+	78665443	78665659	78665443	78665545	78669702	78669855	16300	1,1	6,1	4,1	0,0	198	99	4.23868e-11	6.45917e-09	0.077,0.333	1.0,1.0	-0.795
27028	ENSMUSG00000061904.12	Slc25a3	chr10	-	91123236	91123395	91123295	91123395	91121921	91122043	27028	1,1	2,3	2,2	0,0	158	99	4.42171e-07	2.79516e-05	0.239,0.173	1.0,1.0	-0.794
30640	ENSMUSG00000019782.10	Rwdd1	chr10	-	34010165	34010277	34010206	34010277	34008992	34009123	30640	0,2	2,2	9,1	0,0	140	99	2.31125e-06	0.000120905	0.0,0.414	1.0,1.0	-0.793
22206	ENSMUSG00000026021.15	Sumo1	chr1	-	59670707	59670739	59670723	59670739	59655457	59655532	22206	0,0	1,2	1,6	0,4	115	99	4.78888e-06	0.000231688	0.0,0.0	1.0,0.564	-0.782
1210	ENSMUSG00000068882.13	Ssb	chr2	+	69861561	69861739	69861561	69861712	69866189	69866293	1210	33,31	165141	65,49	4,4	126	99	0	0	0.136,0.147	0.927,0.906	-0.775
29575	ENSMUSG00000031060.16	Rbm10	chrX	+	20617502	20618082	20617502	20617505	20619973	20620114	29575	0,1	3,7	7,9	0,3	198	99	2.58701e-07	1.72162e-05	0.0,0.067	1.0,0.6	-0.767
25681	ENSMUSG00000043716.13	Rpl7	chr1	-	16103989	16104384	16104369	16104384	16103509	16103684	25681	1,9	9,8	37,26	0,1	198	99	8.14515e-12	1.44343e-09	0.053,0.36	1.0,0.929	-0.758
25685	ENSMUSG00000043716.13	Rpl7	chr1	-	16104010	16104384	16104369	16104384	16103509	16103684	25685	1,9	9,8	37,26	0,1	198	99	8.14515e-12	1.44343e-09	0.053,0.36	1.0,0.929	-0.758
16819	ENSMUSG00000048332.13	Lhfp	chr3	+	53041527	53041981	53041527	53041976	53043118	53043691	16819	0,1	1,1	1,7	0,0	104	99	0.00207737	0.0344163	0.0,0.488	1.0,1.0	-0.756
19917	ENSMUSG00000026121.13	Sema4c	chr1	-	36556496	36556929	36556802	36556929	36555931	36556077	19917	0,7	21,19	10,12	0,3	198	99	2.27244e-08	1.96928e-06	0.0,0.156	1.0,0.667	-0.756
10466	ENSMUSG00000001588.12	Acap1	chr11	-	69884091	69884491	69884321	69884491	69883583	69883756	10466	0,0	2,1	2,3	1,0	198	99	4.40817e-07	2.79219e-05	0.0,0.0	0.5,1.0	-0.75
17687	ENSMUSG00000023348.11	Trip6	chr5	-	137310600	137310831	137310732	137310831	137310284	137310405	17687	0,2	5,1	3,7	0,0	198	99	3.79103e-09	3.83283e-07	0.0,0.5	1.0,1.0	-0.75
28066	ENSMUSG00000034566.10	Atp5h	chr11	-	115418298	115418453	115418385	115418453	115416852	115416924	28066	6,8	12,10	15,13	0,0	186	99	7.36577e-12	1.33532e-09	0.21,0.299	1.0,1.0	-0.746
26778	ENSMUSG00000029427.11	Zcchc8	chr5	-	123719328	123719515	123719491	123719515	123714624	123714730	26778	4,2	3,7	2,2	0,0	198	99	5.61813e-09	5.41952e-07	0.4,0.125	1.0,1.0	-0.738
26986	ENSMUSG00000005483.10	Dnajb1	chr8	+	83608552	83608901	83608552	83608833	83609813	83610394	26986	0,3	3,9	1,3	0,1	167	99	0.000229132	0.005881	0.0,0.165	1.0,0.64	-0.738
27799	ENSMUSG00000044950.7	Pwwp2a	chr11	+	43686356	43686437	43686356	43686425	43704533	43707191	27799	0,0	2,3	2,1	2,0	111	99	0.00314485	0.0477707	0.0,0.0	0.471,1.0	-0.736
34001	ENSMUSG00000013822.7	Elof1	chr9	-	22116765	22117086	22116844	22117086	22113807	22113943	34001	0,0	1,1	8,2	5,0	178	99	7.55061e-06	0.000342208	0.0,0.0	0.471,1.0	-0.736
24488	ENSMUSG00000040363.15	Bcor	chrX	-	12136400	12137200	12136719	12137200	12134323	12134869	24488	1,1	2,1	3,3	0,0	198	99	9.5109e-05	0.0029184	0.2,0.333	1.0,1.0	-0.734
5132	ENSMUSG00000061950.17	Ppp4r1	chr17	+	65814305	65814644	65814305	65814418	65815922	65816050	5132	1,1	3,3	5,1	1,0	198	99	6.57568e-05	0.00212524	0.143,0.143	0.714,1.0	-0.714
14592	ENSMUSG00000037487.7	Ubr5	chr15	-	37985871	37986199	37986078	37986199	37983946	37984190	14592	26,25	31,32	12,8	0,0	198	99	1.84429e-10	2.51846e-08	0.295,0.281	1.0,1.0	-0.712
29720	ENSMUSG00000030079.15	Ruvbl1	chr6	+	88465726	88465950	88465726	88465823	88467565	88467652	29720	4,0	6,1	2,4	0,1	198	99	0.00023126	0.00592115	0.25,0.0	1.0,0.667	-0.709
1095	ENSMUSG00000024640.9	Psat1	chr19	-	15917062	15917249	15917076	15917249	15916838	15916957	1095	1,0	6,8	2,4	0,3	113	99	3.26043e-05	0.00118871	0.127,0.0	1.0,0.539	-0.706
26110	ENSMUSG00000029162.15	Khk	chr5	+	30924334	30924479	30924334	30924418	30924738	30924855	26110	0,0	1,2	2,2	0,2	160	99	0.000354354	0.00844878	0.0,0.0	1.0,0.382	-0.691
18057	ENSMUSG00000029169.11	Dhx15	chr5	-	52160257	52160421	52160293	52160421	52157454	52157569	18057	1,0	7,3	1,7	0,6	135	99	0.000459027	0.0104772	0.095,0.0	1.0,0.461	-0.683
35222	ENSMUSG00000020993.9	Trappc6b	chr12	-	59059255	59059511	59059403	59059511	59051640	59051708	35222	0,1	2,3	8,7	4,0	198	99	2.8792e-05	0.00107736	0.0,0.143	0.5,1.0	-0.678
6348	ENSMUSG00000097093.2	C330013E15Rik	chr15	-	100614783	100615110	100615049	100615110	100614136	100614690	6348	1,1	1,1	2,6	0,0	198	99	0.00152796	0.027108	0.333,0.333	1.0,1.0	-0.667
20076	ENSMUSG00000028180.18	Zranb2	chr3	+	157534159	157534439	157534159	157534299	157536333	157536386	20076	0,0	1,2	2,1	0,1	198	99	0.000555871	0.0121513	0.0,0.0	1.0,0.333	-0.666
24675	ENSMUSG00000050335.17	Lgals3	chr14	+	47373963	47374441	47373963	47374106	47379522	47379544	24675	7,7	10,5	4,1	0,0	198	99	1.73079e-06	9.34862e-05	0.259,0.412	1.0,1.0	-0.664
3958	ENSMUSG00000031328.15	Flna	chrX	-	74230484	74230570	74230511	74230570	74230300	74230396	3958	0,4	3,5	6,5	2,0	126	99	0.000616774	0.0131902	0.0,0.386	0.702,1.0	-0.658
4187	ENSMUSG00000025220.8	Oga	chr19	-	45763774	45763890	45763783	45763890	45762184	45762270	4187	2,1	3,2	3,1	0,0	108	99	1.05816e-05	0.000452897	0.379,0.314	1.0,1.0	-0.653
19833	ENSMUSG00000028861.13	Mrps15	chr4	+	126051324	126051459	126051324	126051409	126054960	126055152	19833	0,0	8,5	5,3	2,1	149	99	1.8236e-07	1.25598e-05	0.0,0.0	0.624,0.666	-0.645
20008	ENSMUSG00000026000.16	Lancl1	chr1	-	67038788	67038834	67038803	67038834	67038494	67038591	20008	2,3	3,5	1,4	0,0	114	99	1.33956e-06	7.47879e-05	0.367,0.343	1.0,1.0	-0.645
9413	ENSMUSG00000025579.14	Gaa	chr11	+	119273974	119274218	119273974	119274140	119274640	119274760	9413	1,1	1,1	9,6	0,0	177	99	0.000871357	0.0175071	0.359,0.359	1.0,1.0	-0.641
14657	ENSMUSG00000028455.15	Stoml2	chr4	-	43031223	43031358	43031279	43031358	43030970	43031108	14657	0,4	3,1	2,3	0,0	155	99	6.34105e-05	0.00206208	0.0,0.719	1.0,1.0	-0.641
5284	ENSMUSG00000061607.15	Mdc1	chr17	+	35850294	35851005	35850294	35850513	35851112	35851156	5284	1,4	10,13	25,14	2,5	198	99	6.45968e-08	5.06549e-06	0.048,0.133	0.862,0.583	-0.632
20471	ENSMUSG00000051154.11	Commd3	chr2	+	18673877	18674188	18673877	18674006	18674655	18674692	20471	7,7	10,14	82,64	7,5	198	99	4.00568e-13	8.71416e-11	0.259,0.2	0.854,0.865	-0.63
26938	ENSMUSG00000034211.14	Mrps17	chr5	+	129715683	129715858	129715683	129715828	129716726	129716866	26938	13,12	54,46	87100	19,19	129	99	0	0	0.156,0.167	0.778,0.802	-0.629
30420	ENSMUSG00000051444.9	Bbs12	chr3	+	37312555	37312941	37312555	37312585	37319135	37321453	30420	0,0	5,2	3,7	0,10	198	99	4.65718e-05	0.00158589	0.0,0.0	1.0,0.259	-0.629
25998	ENSMUSG00000026280.17	Atg4b	chr1	+	93785582	93785827	93785582	93785806	93785909	93786024	25998	2,1	2,2	3,2	0,0	120	99	5.93672e-05	0.00194868	0.452,0.292	1.0,1.0	-0.628
23883	ENSMUSG00000006395.16	Hyi	chr4	+	118359989	118360439	118359989	118360233	118361615	118361730	23883	2,2	3,1	5,7	0,0	198	99	1.61872e-05	0.000652951	0.25,0.5	1.0,1.0	-0.625
2059	ENSMUSG00000039178.9	Tbc1d19	chr5	+	53830454	53830555	53830454	53830500	53831366	53831488	2059	3,0	4,2	14,7	3,1	154	99	0.00103364	0.0199971	0.325,0.0	0.75,0.818	-0.622
15887	ENSMUSG00000025337.10	Sbds	chr5	-	130255089	130255405	130255143	130255405	130253938	130254068	15887	2,1	4,3	3,8	1,0	153	99	9.80109e-06	0.000425262	0.244,0.177	0.66,1.0	-0.62
20474	ENSMUSG00000051154.11	Commd3	chr2	+	18673877	18674361	18673877	18674006	18674655	18674716	20474	9,7	10,14	87,74	7,5	198	99	1.37934e-12	2.7891e-10	0.31,0.2	0.861,0.881	-0.616
5759	ENSMUSG00000058240.14	Cryzl1	chr16	-	91695228	91695359	91695260	91695359	91692598	91692704	5759	0,0	3,2	4,7	3,2	131	99	2.95715e-07	1.93528e-05	0.0,0.0	0.502,0.726	-0.614
26640	ENSMUSG00000028639.14	Ybx1	chr4	-	119285036	119285142	119285108	119285142	119282272	119282448	26640	28,25	570515	69,33	18,13	171	99	0	0	0.028,0.027	0.689,0.595	-0.614
21449	ENSMUSG00000027309.18	4930402H24Rik	chr2	-	130717053	130717347	130717260	130717347	130712951	130713026	21449	0,1	4,4	1,3	1,0	198	99	6.40619e-05	0.00207634	0.0,0.111	0.333,1.0	-0.611
29309	ENSMUSG00000063316.13	Rpl27	chr11	+	101442297	101442650	101442297	101442402	101442722	101442805	29309	1,7	12,20	20,32	8,3	198	99	6.12754e-08	4.84429e-06	0.04,0.149	0.556,0.842	-0.605
25053	ENSMUSG00000040302.17	Rbm48	chr5	-	3590891	3591042	3590896	3591042	3590778	3590803	25053	4,0	1,3	1,1	0,0	104	99	0.000512895	0.0113935	0.792,0.0	1.0,1.0	-0.604
27026	ENSMUSG00000061904.12	Slc25a3	chr10	-	91123295	91123706	91123557	91123706	91119526	91119706	27026	3,0	10,10	2,1	0,1	198	99	0.00190188	0.0321333	0.13,0.0	1.0,0.333	-0.601
28420	ENSMUSG00000032702.16	Kank1	chr19	+	25236974	25237317	25236974	25236992	25274747	25274834	28420	0,2	1,4	8,9	6,0	198	99	0.00190817	0.0322223	0.0,0.2	0.4,1.0	-0.6
15493	ENSMUSG00000018900.7	Slc22a5	chr11	-	53875989	53876163	53875995	53876163	53874934	53875106	15493	4,0	3,5	4,3	0,1	105	99	0.000100882	0.00306869	0.557,0.0	1.0,0.739	-0.591
8456	ENSMUSG00000041886.7	Macc1	chr12	+	119428746	119429121	119428746	119429079	119443401	119443524	8456	0,0	3,4	4,4	2,2	141	99	1.10566e-06	6.30686e-05	0.0,0.0	0.584,0.584	-0.584
20900	ENSMUSG00000021111.15	Papola	chr12	+	105784693	105785165	105784693	105784918	105799650	105799824	20900	6,2	3,2	4,3	0,0	198	99	3.92708e-06	0.000195388	0.5,0.333	1.0,1.0	-0.584
16676	ENSMUSG00000028389.12	Zfp37	chr4	-	62208189	62208446	62208319	62208446	62205023	62205108	16676	5,3	5,7	5,4	0,1	198	99	7.19162e-05	0.00230112	0.333,0.176	1.0,0.667	-0.579
10978	ENSMUSG00000049811.16	Fam161a	chr11	+	23008464	23008631	23008464	23008626	23015654	23015884	10978	1,4	4,2	2,3	0,0	104	99	5.00791e-06	0.000240075	0.192,0.656	1.0,1.0	-0.576
10775	ENSMUSG00000042050.8	Wdr60	chr12	-	116262586	116262974	116262850	116262974	116255830	116256251	10775	12,1	2,4	4,6	0,0	198	99	8.34925e-06	0.0003699	0.75,0.111	1.0,1.0	-0.57
4074	ENSMUSG00000001924.15	Uba1	chrX	+	20658325	20658728	20658325	20658625	20668448	20668565	4074	1,0	2,2	1,2	1,0	198	99	0.000577291	0.0125069	0.2,0.0	0.333,1.0	-0.567
26940	ENSMUSG00000034211.14	Mrps17	chr5	+	129715683	129715941	129715683	129715828	129716726	129716866	26940	21,25	54,46	127108	19,19	198	99	0	0	0.163,0.214	0.77,0.74	-0.567
9713	ENSMUSG00000017493.12	Igfbp4	chr11	+	99041759	99042128	99041759	99041850	99048225	99048371	9713	1,3	6,4	9,14	3,1	198	99	0.000133708	0.00384025	0.077,0.273	0.6,0.875	-0.562
25423	ENSMUSG00000001248.15	Gramd1a	chr7	-	31135519	31135739	31135596	31135739	31134413	31134517	25423	69,75	266260	296206	49,72	176	99	0	0	0.127,0.14	0.773,0.617	-0.562
7135	ENSMUSG00000022064.10	Pibf1	chr14	+	99101028	99101301	99101028	99101173	99107298	99107764	7135	2,0	2,2	5,11	3,0	198	99	0.00159892	0.0280827	0.333,0.0	0.455,1.0	-0.561
1160	ENSMUSG00000024050.17	Wiz	chr17	-	32381055	32381156	32381083	32381156	32378839	32379118	1160	1,0	4,4	2,3	0,6	127	99	0.00170556	0.0295443	0.163,0.0	1.0,0.28	-0.558
4444	ENSMUSG00000056629.16	Fkbp2	chr19	-	6978589	6979047	6978972	6979047	6978389	6978436	4444	30,27	19,17	29,27	0,0	198	99	9.46465e-13	1.99035e-10	0.441,0.443	1.0,1.0	-0.558
22364	ENSMUSG00000071644.10	Eef1g	chr19	+	8967040	8967522	8967040	8967074	8968215	8968374	22364	5,2	4,1	25,17	0,0	198	99	2.65546e-06	0.000137769	0.385,0.5	1.0,1.0	-0.557
28316	ENSMUSG00000064043.13	Trerf1	chr17	+	47140874	47141045	47140874	47140965	47141823	47141909	28316	1,0	3,4	8,3	1,2	179	99	2.14111e-05	0.00082972	0.156,0.0	0.816,0.453	-0.556
24394	ENSMUSG00000009687.14	Fxyd5	chr7	-	31041727	31042078	31042046	31042078	31041396	31041457	24394	4,0	1,3	25,14	0,2	198	99	0.000561867	0.0122569	0.667,0.0	1.0,0.778	-0.555
18479	ENSMUSG00000026626.11	Ppp2r5a	chr1	-	191372530	191372666	191372535	191372666	191368640	191368742	18479	4,1	2,3	10,8	0,0	104	99	1.96739e-05	0.00077123	0.656,0.241	1.0,1.0	-0.551
30448	ENSMUSG00000036086.16	Zranb3	chr1	-	128102967	128103047	128103006	128103047	128091842	128092010	30448	0,4	2,6	2,1	0,1	138	99	0.00198114	0.0331528	0.0,0.324	1.0,0.418	-0.547
33507	ENSMUSG00000022051.15	Bnip3l	chr14	-	66993616	66993949	66993872	66993949	66989433	66989509	33507	4,1	3,4	3,1	1,0	198	99	0.0020095	0.0335263	0.4,0.111	0.6,1.0	-0.544
2519	ENSMUSG00000001248.15	Gramd1a	chr7	-	31135525	31135739	31135596	31135739	31134413	31134517	2519	88,99	266260	311220	49,72	170	99	0	0	0.162,0.181	0.787,0.64	-0.542
31693	ENSMUSG00000055720.10	Ubl7	chr9	+	57910985	57911136	57910985	57911059	57914553	57914673	31693	0,7	6,2	3,5	0,1	176	99	0.000282325	0.00693501	0.0,0.663	1.0,0.738	-0.537
35543	ENSMUSG00000032480.17	Dhx30	chr9	-	110116935	110117385	110117357	110117385	110116677	110116755	35543	1,2	3,2	6,8	1,1	198	99	0.000860871	0.0173723	0.143,0.333	0.75,0.8	-0.537
26740	ENSMUSG00000024910.5	Ctsw	chr19	-	5466193	5466485	5466230	5466485	5466019	5466110	26740	1,2	3,3	1,2	0,1	136	99	0.00153018	0.0271321	0.195,0.327	1.0,0.593	-0.535
30904	ENSMUSG00000030512.13	Snrpa1	chr7	+	66069166	66069596	66069166	66069213	66070589	66070665	30904	7,5	7,7	30,22	5,1	198	99	1.6757e-05	0.000672495	0.333,0.263	0.75,0.917	-0.535
14738	ENSMUSG00000070493.3	Chchd2	chr5	-	129886938	129887273	129887049	129887273	129883933	129884183	14738	0,0	1,3	11,1	2,1	198	99	1.3661e-06	7.58665e-05	0.0,0.0	0.733,0.333	-0.533
14744	ENSMUSG00000045917.17	Tmem268	chr4	+	63560226	63560725	63560226	63560405	63560911	63560995	14744	0,0	3,1	6,1	0,7	198	99	0.0026988	0.0424582	0.0,0.0	1.0,0.067	-0.533
1108	ENSMUSG00000040687.16	Madd	chr2	-	91158404	91158488	91158416	91158488	91157984	91158143	1108	1,1	5,2	11,10	6,1	111	99	0.000620618	0.0132634	0.151,0.308	0.621,0.899	-0.53
26916	ENSMUSG00000034211.14	Mrps17	chr5	+	129715496	129715961	129715496	129715828	129716726	129716866	26916	23,19	54,46	91,87	19,19	198	99	0	0	0.176,0.171	0.705,0.696	-0.527
26939	ENSMUSG00000034211.14	Mrps17	chr5	+	129715683	129715912	129715683	129715828	129716726	129716866	26939	17,18	54,46	76,75	19,19	183	99	0	0	0.146,0.175	0.684,0.681	-0.522
16409	ENSMUSG00000023905.15	Tnfrsf12a	chr17	-	23677095	23677197	23677120	23677197	23676518	23676623	16409	9,3	4,10	16,20	2,0	124	99	2.02949e-05	0.000792307	0.642,0.193	0.865,1.0	-0.515
35188	ENSMUSG00000047036.8	Zfp445	chr9	-	122856702	122857161	122857066	122857161	122854706	122854817	35188	2,7	2,2	47,44	0,0	198	99	0.000255826	0.00638938	0.333,0.636	1.0,1.0	-0.515
32727	ENSMUSG00000031634.13	Ufsp2	chr8	+	45975577	45975798	45975577	45975777	45979208	45979295	32727	3,3	3,4	7,10	1,0	120	99	1.88093e-05	0.000747257	0.452,0.382	0.852,1.0	-0.509
18975	ENSMUSG00000004880.11	Lbr	chr1	-	181836061	181836288	181836081	181836288	181832148	181832232	18975	2,2	2,7	7,17	3,0	119	99	0.000250383	0.00628829	0.454,0.192	0.66,1.0	-0.507
20158	ENSMUSG00000044783.16	Hjurp	chr1	-	88276969	88277285	88277218	88277285	88270201	88270299	20158	79,84	50,35	64,39	0,0	198	99	0	0	0.441,0.545	1.0,1.0	-0.507
17278	ENSMUSG00000027424.11	Mgme1	chr2	+	144270899	144271072	144270899	144270947	144271914	144272484	17278	10,12	26,21	60,63	12,15	198	99	1.58829e-12	3.19114e-10	0.161,0.222	0.714,0.677	-0.504
31743	ENSMUSG00000031878.18	Nae1	chr8	-	104527377	104530116	104530055	104530116	104526673	104527118	31743	17,16	9,9	54,30	1,0	198	99	1.03348e-10	1.46847e-08	0.486,0.471	0.964,1.0	-0.504
6117	ENSMUSG00000115219.2	Eef1akmt4	chr16	+	20617625	20618002	20617625	20617794	20618389	20619011	6117	0,1	2,0	1,3	0,0	198	99	0.00119564	0.0222378	0.0,1.0	1.0,1.0	-0.5
18196	ENSMUSG00000032553.14	Srprb	chr9	-	103198781	103198866	103198788	103198866	103192212	103192349	18196	6,4	7,3	16,9	0,0	106	99	6.00229e-08	4.75719e-06	0.445,0.555	1.0,1.0	-0.5
23625	ENSMUSG00000048758.14	Rpl29	chr9	+	106429453	106429610	106429453	106429570	106429969	106430014	23625	1,0	0,4	5,1	0,0	139	99	0.000320754	0.00774722	1.0,0.0	1.0,1.0	-0.5
23626	ENSMUSG00000048758.14	Rpl29	chr9	+	106429453	106429631	106429453	106429570	106429969	106430014	23626	1,0	0,4	2,2	0,0	160	99	0.00021411	0.00555346	1.0,0.0	1.0,1.0	-0.5
23638	ENSMUSG00000048758.14	Rpl29	chr9	+	106429453	106429828	106429453	106429652	106429969	106430014	23638	0,1	3,0	4,2	0,0	198	99	0.000246169	0.00620824	0.0,1.0	1.0,1.0	-0.5
29666	ENSMUSG00000004500.9	Zfp324	chr7	+	12968794	12968968	12968794	12968884	12969363	12969480	29666	0,1	2,0	8,5	0,0	183	99	0.00151505	0.0270003	0.0,1.0	1.0,1.0	-0.5
31267	ENSMUSG00000039018.15	Mtg1	chr7	+	140137563	140137827	140137563	140137689	140138318	140138383	31267	0,1	2,0	7,2	0,0	198	99	0.00119564	0.0222378	0.0,1.0	1.0,1.0	-0.5
31268	ENSMUSG00000039018.15	Mtg1	chr7	+	140137563	140137847	140137563	140137689	140138318	140138383	31268	0,1	2,0	12,2	0,0	198	99	0.00119564	0.0222378	0.0,1.0	1.0,1.0	-0.5
31849	ENSMUSG00000028032.13	Papss1	chr3	+	131565591	131565780	131565591	131565643	131565947	131566060	31849	0,2	3,0	3,2	0,0	198	99	0.0023046	0.0373464	0.0,1.0	1.0,1.0	-0.5
18350	ENSMUSG00000097403.2	9230116N13Rik	chr1	-	136414848	136415519	136415175	136415519	136413163	136413677	18350	2,0	6,2	9,7	3,3	198	99	0.000164231	0.00452954	0.143,0.0	0.6,0.538	-0.497
23510	ENSMUSG00000062661.6	Ncs1	chr2	+	31287286	31287541	31287286	31287519	31292283	31295989	23510	0,3	9,3	7,9	3,2	121	99	0.000829305	0.0168663	0.0,0.45	0.656,0.786	-0.496
24618	ENSMUSG00000024962.13	Vegfb	chr19	-	6986009	6986486	6986289	6986486	6985804	6985840	24618	11,10	7,5	34,27	0,1	198	99	2.45663e-08	2.10576e-06	0.44,0.5	1.0,0.931	-0.496
31689	ENSMUSG00000055720.10	Ubl7	chr9	+	57911050	57911319	57911050	57911171	57911716	57911825	31689	16,18	10,17	28,18	4,0	198	99	1.76928e-05	0.000704675	0.444,0.346	0.778,1.0	-0.494
24615	ENSMUSG00000024962.13	Vegfb	chr19	-	6986003	6986486	6986289	6986486	6985804	6985840	24615	11,10	7,5	34,25	0,1	198	99	3.62278e-08	3.00729e-06	0.44,0.5	1.0,0.926	-0.493
28057	ENSMUSG00000068039.13	Tcp1	chr17	+	12918042	12918449	12918042	12918171	12919814	12920228	28057	248192	147145	310244	15,10	198	99	0	0	0.458,0.398	0.912,0.924	-0.49
26915	ENSMUSG00000034211.14	Mrps17	chr5	+	129715496	129715945	129715496	129715828	129716726	129716866	26915	10,11	54,46	56,51	19,19	198	99	0	0	0.085,0.107	0.596,0.573	-0.489
26067	ENSMUSG00000041879.13	Ipo9	chr1	-	135426923	135427036	135426930	135427036	135425923	135425986	26067	3,1	2,3	4,4	1,0	106	99	0.00050101	0.0112084	0.583,0.237	0.789,1.0	-0.485
11222	ENSMUSG00000025351.14	Cd63	chr10	+	128910394	128910889	128910394	128910812	128911451	128911640	11222	4,2	8,5	13,7	3,2	176	99	0.000309933	0.00751803	0.22,0.184	0.709,0.663	-0.484
28953	ENSMUSG00000022248.14	Rad1	chr15	+	10486017	10486072	10486017	10486026	10486452	10486716	28953	3,11	5,6	6,6	0,1	145	99	0.000129925	0.00376687	0.291,0.556	1.0,0.804	-0.479
25767	ENSMUSG00000028403.15	Zdhhc21	chr4	-	82848303	82848375	82848330	82848375	82847616	82847739	25767	0,0	5,2	4,2	2,3	126	99	1.04662e-05	0.000449791	0.0,0.0	0.611,0.344	-0.477
24620	ENSMUSG00000024962.13	Vegfb	chr19	-	6986030	6986486	6986289	6986486	6985804	6985840	24620	10,13	7,5	34,28	0,1	198	99	7.2117e-08	5.53494e-06	0.417,0.565	1.0,0.933	-0.476
32498	ENSMUSG00000031557.16	Plekha2	chr8	-	25101487	25101771	25101491	25101771	25088341	25088505	32498	6,2	3,3	3,3	0,0	103	99	1.29198e-05	0.000538365	0.658,0.391	1.0,1.0	-0.476
6005	ENSMUSG00000022849.5	Hspbap1	chr16	+	35813914	35814054	35813914	35814043	35814329	35814409	6005	2,1	9,8	6,3	3,2	110	99	0.000679666	0.0142862	0.167,0.101	0.643,0.574	-0.475
43	ENSMUSG00000031105.16	Slc25a14	chrX	+	48623961	48624206	48623961	48624197	48629251	48629345	43	1,1	2,1	1,3	0,1	108	99	0.00198838	0.0332563	0.314,0.478	1.0,0.733	-0.471
26914	ENSMUSG00000034211.14	Mrps17	chr5	+	129715496	129715923	129715496	129715828	129716726	129716866	26914	7,8	54,46	47,41	19,19	194	99	0	0	0.062,0.082	0.558,0.524	-0.469
273	ENSMUSG00000036552.19	Ermard	chr17	+	15044322	15044430	15044322	15044424	15045046	15045136	273	0,1	1,1	7,6	5,1	105	99	0.00310285	0.0473352	0.0,0.485	0.569,0.85	-0.467
2347	ENSMUSG00000021288.18	Klc1	chr12	+	111789324	111789486	111789324	111789459	111795547	111795678	2347	80,58	128,89	163214	28,48	126	99	0	0	0.329,0.339	0.821,0.778	-0.465
8929	ENSMUSG00000060073.9	Psma3	chr12	+	70978732	70979008	70978732	70978815	70988423	70988489	8929	11,10	13,7	45,23	4,3	198	99	2.14157e-06	0.000113155	0.297,0.417	0.849,0.793	-0.464
29140	ENSMUSG00000027411.17	Vps16	chr2	+	130441607	130441908	130441607	130441705	130442172	130442250	29140	0,2	4,0	22,23	1,0	198	99	0.00197589	0.0330826	0.0,1.0	0.917,1.0	-0.459
26455	ENSMUSG00000094410.7	Gm38394	chr1	-	133655344	133661318	133661255	133661318	133653972	133654032	26455	25,28	24,15	30,49	1,6	198	99	7.61724e-07	4.53355e-05	0.342,0.483	0.938,0.803	-0.458
1953	ENSMUSG00000057335.11	Cep170	chr1	-	176742500	176742648	176742551	176742648	176739918	176740089	1953	154127	99,92	133106	6,3	150	99	0	0	0.507,0.477	0.936,0.959	-0.456
24000	ENSMUSG00000062997.6	Rpl35	chr2	-	39003006	39003115	39003052	39003115	39001618	39001765	24000	0,0	1,2	3,6	3,4	145	99	8.54147e-06	0.000377356	0.0,0.0	0.406,0.506	-0.456
6103	ENSMUSG00000021018.8	Polr2h	chr16	+	20718823	20719089	20718823	20718907	20721909	20722267	6103	45,32	13,22	110,94	2,0	198	99	9.448e-14	2.12877e-11	0.634,0.421	0.965,1.0	-0.455
17551	ENSMUSG00000026500.6	Cox20	chr1	+	178321744	178322131	178321744	178321859	178322480	178322693	17551	24,14	17,9	52,30	2,3	198	99	5.79276e-08	4.60269e-06	0.414,0.438	0.929,0.833	-0.455
21312	ENSMUSG00000027893.14	Ahcyl1	chr3	-	107669896	107670320	107670203	107670320	107669092	107669181	21312	7,5	2,3	30,27	0,0	198	99	1.60865e-05	0.00065002	0.636,0.455	1.0,1.0	-0.455
24056	ENSMUSG00000042138.8	Msantd2	chr9	+	37513613	37513772	37513613	37513703	37517216	37517472	24056	0,3	3,1	2,2	1,0	168	99	0.00123986	0.022858	0.0,0.639	0.541,1.0	-0.451
21581	ENSMUSG00000045193.13	Cirbp	chr10	+	80170693	80171069	80170693	80170764	80172413	80172512	21581	8,12	17,10	53,38	13,5	198	99	9.49522e-06	0.000414844	0.19,0.375	0.671,0.792	-0.449
17377	ENSMUSG00000046688.14	Tifa	chr3	+	127790654	127790929	127790654	127790749	127791472	127791529	17377	1,0	4,2	8,12	8,3	198	99	0.000106638	0.00320973	0.111,0.0	0.333,0.667	-0.445
21266	ENSMUSG00000024163.17	Mapk8ip3	chr17	-	24917983	24918136	24917994	24918136	24914458	24914705	21266	2,3	245225	4,5	6,4	110	99	9.94769e-10	1.12469e-07	0.007,0.012	0.375,0.529	-0.443
1815	ENSMUSG00000032712.16	Resf1	chr6	+	149310321	149310377	149310321	149310359	149325404	149329784	1815	28,22	30,26	68,63	12,5	117	99	7.08056e-12	1.29104e-09	0.441,0.417	0.827,0.914	-0.442
6662	ENSMUSG00000000489.7	Pdgfb	chr15	-	80013049	80013203	80013089	80013203	80005472	80005565	6662	0,1	3,10	3,1	1,2	139	99	0.00227044	0.0368789	0.0,0.066	0.681,0.263	-0.439
19826	ENSMUSG00000034194.17	R3hcc1	chr14	-	69705095	69705313	69705150	69705313	69703953	69704126	19826	5,2	3,7	9,13	2,2	154	99	0.00330973	0.0495971	0.517,0.155	0.743,0.807	-0.439
28954	ENSMUSG00000022248.14	Rad1	chr15	+	10486017	10486075	10486017	10486026	10486452	10486716	28954	13,5	5,6	22,10	0,1	148	99	7.48765e-06	0.000339842	0.635,0.358	1.0,0.87	-0.439
27180	ENSMUSG00000029716.13	Tfr2	chr5	+	137569850	137569959	137569850	137569934	137570071	137570118	27180	3,2	2,4	3,1	1,0	124	99	0.00158123	0.0278184	0.545,0.285	0.705,1.0	-0.438
1952	ENSMUSG00000057335.11	Cep170	chr1	-	176742470	176742648	176742551	176742648	176739918	176740089	1952	165133	99,92	78,57	6,3	180	99	5.21805e-15	1.37165e-12	0.478,0.443	0.877,0.913	-0.434
6482	ENSMUSG00000022462.7	Slc38a2	chr15	-	96697911	96698263	96698181	96698263	96695435	96695509	6482	38,39	33,48	85,63	15,9	198	99	7.70117e-12	1.38815e-09	0.365,0.289	0.739,0.778	-0.431
16344	ENSMUSG00000028081.6	Rps3a1	chr3	-	86142215	86142702	86142457	86142702	86141697	86141801	16344	1,0	0,2	12,10	1,0	198	99	0.00109061	0.0206993	1.0,0.0	0.857,1.0	-0.428
33394	ENSMUSG00000031875.7	Cmtm3	chr8	+	104344576	104344665	104344576	104344608	104344776	104344872	33394	0,0	4,1	2,4	3,2	156	99	3.03567e-05	0.00111605	0.0,0.0	0.297,0.559	-0.428
7570	ENSMUSG00000024436.16	Mrps18b	chr17	-	35914333	35914792	35914491	35914792	35910378	35910956	7570	5,9	3,2	29,17	0,0	198	99	2.94792e-05	0.00109528	0.455,0.692	1.0,1.0	-0.426
16702	ENSMUSG00000002910.11	Arrdc2	chr8	-	70839503	70839660	70839607	70839660	70838978	70839045	16702	8,11	4,3	2,1	0,0	198	99	6.41402e-06	0.000295795	0.5,0.647	1.0,1.0	-0.426
20159	ENSMUSG00000044783.16	Hjurp	chr1	-	88277178	88277285	88277218	88277285	88270201	88270299	20159	78,81	50,35	64,39	0,0	139	99	0	0	0.526,0.622	1.0,1.0	-0.426
23394	ENSMUSG00000026837.15	Col5a1	chr2	+	28028966	28029165	28028966	28029035	28032590	28032824	23394	225208	446408	203163	46,62	198	99	0	0	0.201,0.203	0.688,0.568	-0.426
9578	ENSMUSG00000020694.17	Tlk2	chr11	+	105182216	105182485	105182216	105182358	105184211	105184294	9578	1,2	8,10	4,6	2,3	198	99	0.000300788	0.00732103	0.059,0.091	0.5,0.5	-0.425
17176	ENSMUSG00000035949.15	Fbxw2	chr2	-	34812765	34813009	34812814	34813009	34808513	34808600	17176	4,4	4,2	12,7	0,1	148	99	0.000127798	0.00371544	0.401,0.572	1.0,0.824	-0.425
348	ENSMUSG00000022789.15	Dnm1l	chr16	-	16345979	16346145	16345997	16346145	16340995	16341067	348	9,8	24,39	21,15	14,6	117	99	1.70936e-06	9.26462e-05	0.241,0.148	0.559,0.679	-0.424
21675	ENSMUSG00000026260.12	Ndufa10	chr1	-	92462930	92462988	92462949	92462988	92462290	92462345	21675	0,0	17,13	3,5	4,5	118	99	7.17507e-07	4.28656e-05	0.0,0.0	0.386,0.456	-0.421
24653	ENSMUSG00000028133.17	Rwdd3	chr3	-	121156166	121156302	121156186	121156302	121155938	121156057	24653	0,0	3,6	4,3	2,9	119	99	3.62747e-05	0.00130473	0.0,0.0	0.625,0.217	-0.421
34721	ENSMUSG00000004980.16	Hnrnpa2b1	chr6	-	51463216	51463493	51463410	51463493	51461919	51462055	34721	119,94	115111	770556	102126	198	99	0	0	0.341,0.297	0.791,0.688	-0.421
1546	ENSMUSG00000024937.15	Ehbp1l1	chr19	-	5717661	5720407	5719947	5720407	5717038	5717196	1546	46,46	25,33	107,69	6,7	198	99	3.70437e-12	6.9554e-10	0.479,0.411	0.899,0.831	-0.42
32697	ENSMUSG00000031600.11	Vps37a	chr8	+	40540913	40541093	40540913	40540947	40543809	40543953	32697	69,79	28,32	133195	2,3	198	99	0	0	0.552,0.552	0.971,0.97	-0.418
17048	ENSMUSG00000027663.12	Zmat3	chr3	-	32365165	32365460	32365343	32365460	32361071	32361216	17048	9,8	7,5	13,19	2,1	198	99	0.000447138	0.0102653	0.391,0.444	0.765,0.905	-0.417
2037	ENSMUSG00000026811.18	St6galnac6	chr2	+	32608041	32608225	32608041	32608096	32612223	32612403	2037	40,50	19,18	49,39	2,0	198	99	8.90595e-10	1.01054e-07	0.513,0.581	0.925,1.0	-0.416
5903	ENSMUSG00000002845.14	Tmem39a	chr16	+	38562811	38563212	38562811	38563047	38564114	38564301	5903	0,0	14,11	2,6	2,3	198	99	7.78877e-07	4.60092e-05	0.0,0.0	0.333,0.5	-0.416
12482	ENSMUSG00000029213.11	Commd8	chr5	-	72167744	72168156	72168071	72168156	72165350	72165506	12482	0,0	8,1	2,2	2,1	198	99	0.00213865	0.0351179	0.0,0.0	0.333,0.5	-0.416
28625	ENSMUSG00000002871.14	Tpra1	chr6	+	88910370	88910650	88910370	88910401	88911682	88912231	28625	11,7	2,7	50,35	0,2	198	99	3.50015e-05	0.00126615	0.733,0.333	1.0,0.897	-0.415
30615	ENSMUSG00000063511.11	Snrnp70	chr7	-	45383099	45383184	45383124	45383184	45380716	45380818	30615	4,3	5,9	66,35	22,11	124	99	0.000361552	0.0086074	0.39,0.21	0.705,0.718	-0.412
26922	ENSMUSG00000034211.14	Mrps17	chr5	+	129715557	129715910	129715557	129715828	129716726	129716866	26922	113,89	54,46	475509	19,19	181	99	0	0	0.534,0.514	0.932,0.936	-0.41
5063	ENSMUSG00000024097.11	Srsf7	chr17	-	80205239	80205438	80205261	80205438	80204621	80205081	5063	59,31	72,58	482407	134,95	121	99	0	0	0.401,0.304	0.746,0.778	-0.409
31437	ENSMUSG00000036781.13	Rps27l	chr9	+	66946354	66946678	66946354	66946512	66946830	66946939	31437	0,0	2,2	31,21	25,14	198	99	1.3014e-05	0.00054086	0.0,0.0	0.383,0.429	-0.406
28659	ENSMUSG00000032776.9	Mctp2	chr7	-	72110515	72110583	72110532	72110583	72103193	72103253	28659	0,0	1,3	7,9	10,10	116	99	2.8855e-05	0.00107844	0.0,0.0	0.374,0.434	-0.404
26871	ENSMUSG00000029430.13	Ran	chr5	+	129020201	129020562	129020201	129020278	129020683	129020788	26871	17,5	9,10	23,12	4,2	198	99	0.00238273	0.0383083	0.486,0.2	0.742,0.75	-0.403
2738	ENSMUSG00000030815.11	Phkg2	chr7	+	127577534	127577710	127577534	127577688	127579666	127579732	2738	17,7	26,11	31,29	11,6	121	99	6.12726e-06	0.000285071	0.349,0.342	0.698,0.798	-0.402
4895	ENSMUSG00000117694.1	Gm28285	chr18	+	35557336	35557396	35557336	35557391	35577557	35577619	4895	12,6	14,21	45,30	10,15	104	99	0.000135092	0.00386691	0.449,0.214	0.811,0.656	-0.402
32698	ENSMUSG00000031600.11	Vps37a	chr8	+	40540888	40541216	40540888	40540947	40543809	40544041	32698	4,7	28,32	7,3	2,3	198	99	0.00114227	0.0214731	0.067,0.099	0.636,0.333	-0.402
21267	ENSMUSG00000024163.17	Mapk8ip3	chr17	-	24917983	24918136	24918087	24918136	24914458	24914705	21267	292279	129107	99,75	4,1	198	99	1.11022e-16	3.50209e-14	0.531,0.566	0.925,0.974	-0.401
22120	ENSMUSG00000097080.8	1700086O06Rik	chr18	-	38249713	38250173	38250107	38250173	38240838	38240953	22120	15,3	2,3	46,58	1,1	198	99	0.00157477	0.0277202	0.789,0.333	0.958,0.967	-0.401
17816	ENSMUSG00000028261.13	Ndufaf4	chr4	+	24901693	24902058	24901693	24901781	24903131	24903485	17816	2,0	1,5	18,16	9,2	198	99	0.00208223	0.0344425	0.5,0.0	0.5,0.8	-0.4
21700	ENSMUSG00000021470.19	Ercc6l2	chr13	+	63819630	63820055	63819630	63819946	63834595	63834789	21700	2,1	4,0	7,9	0,0	198	99	0.00301634	0.0463004	0.2,1.0	1.0,1.0	-0.4
31782	ENSMUSG00000030714.14	Sgf29	chr7	+	126662562	126663052	126662562	126662651	126663928	126664004	31782	0,0	2,3	4,6	2,7	198	99	1.92347e-05	0.000760384	0.0,0.0	0.5,0.3	-0.4
17291	ENSMUSG00000051469.14	Zfp24	chr18	-	24019831	24020370	24020229	24020370	24017970	24018168	17291	3,5	1,2	53,42	0,1	198	99	0.00152557	0.0271048	0.6,0.556	1.0,0.955	-0.399
31561	ENSMUSG00000023942.15	Slc29a1	chr17	-	45595475	45595903	45595877	45595903	45592178	45592261	31561	1,0	3,2	9,7	5,4	198	99	0.000181871	0.00488589	0.143,0.0	0.474,0.467	-0.399
7464	ENSMUSG00000049295.17	Zfp219	chr14	-	52014430	52014912	52014850	52014912	52009969	52010058	7464	2,7	2,3	3,4	0,1	198	99	0.00252213	0.0401606	0.333,0.538	1.0,0.667	-0.398
9950	ENSMUSG00000037458.15	Azin1	chr15	-	38507122	38507346	38507198	38507346	38501403	38501600	9950	0,0	2,3	1,6	3,2	175	99	9.56666e-05	0.00293266	0.0,0.0	0.159,0.629	-0.394
17107	ENSMUSG00000018572.10	Phf23	chr11	+	69996990	69997061	69996990	69997059	69997596	69997628	17107	0,0	4,2	4,6	5,11	101	99	1.77272e-05	0.000705152	0.0,0.0	0.44,0.348	-0.394
31560	ENSMUSG00000023942.15	Slc29a1	chr17	-	45595475	45595852	45595794	45595852	45592178	45592261	31560	1,2	8,15	8,7	2,11	198	99	0.000861348	0.0173723	0.059,0.062	0.667,0.241	-0.394
35545	ENSMUSG00000032480.17	Dhx30	chr9	-	110116935	110117431	110117357	110117431	110116677	110116792	35545	2,2	37,41	8,8	4,8	198	99	1.4386e-08	1.28918e-06	0.026,0.024	0.5,0.333	-0.391
2306	ENSMUSG00000032280.16	Tle3	chr9	+	61394607	61394712	61394607	61394682	61401855	61402057	2306	14,9	30,24	26,28	22,6	129	99	0.000530008	0.0117077	0.264,0.223	0.476,0.782	-0.386
9484	ENSMUSG00000020770.13	Unk	chr11	+	116053015	116053176	116053015	116053119	116053489	116053690	9484	19,11	26,33	26,25	8,11	156	99	7.6424e-06	0.000343962	0.317,0.175	0.673,0.591	-0.386
21211	ENSMUSG00000026153.15	Fam135a	chr1	-	24053182	24053336	24053222	24053336	24046357	24046407	21211	69,51	24,29	5,2	0,0	139	99	3.02547e-05	0.00111605	0.672,0.556	1.0,1.0	-0.386
24762	ENSMUSG00000040952.16	Rps19	chr7	+	24884916	24885336	24884916	24885212	24885451	24885552	24762	0,1	1,1	21,21	9,8	198	99	0.00126148	0.0231216	0.0,0.333	0.538,0.568	-0.386
19825	ENSMUSG00000034194.17	R3hcc1	chr14	-	69705090	69705313	69705150	69705313	69703953	69704126	19825	0,0	3,7	2,2	2,2	159	99	0.000595471	0.0128215	0.0,0.0	0.384,0.384	-0.384
27454	ENSMUSG00000025574.13	Tk1	chr11	-	117825706	117825837	117825713	117825837	117824670	117824781	27454	5,2	7,8	58,52	22,27	106	99	0.00171645	0.0296515	0.4,0.189	0.711,0.643	-0.383
3644	ENSMUSG00000042210.17	Abhd14a	chr9	-	106443805	106443942	106443826	106443942	106440620	106440910	3644	6,6	30,25	24,25	10,30	120	99	5.50356e-05	0.0018332	0.142,0.165	0.664,0.407	-0.382
2178	ENSMUSG00000063047.9	Zfp780b	chr7	-	27976739	27976833	27976751	27976833	27974752	27974805	2178	4,4	20,12	54,31	22,33	111	99	6.9271e-05	0.00223652	0.151,0.229	0.686,0.456	-0.381
19743	ENSMUSG00000037904.14	Ankrd9	chr12	-	110977645	110977770	110977663	110977770	110976428	110977548	19743	1,2	12,4	7,8	6,4	117	99	0.00105596	0.020157	0.066,0.297	0.497,0.629	-0.381
21777	ENSMUSG00000026159.13	Agfg1	chr1	+	82886113	82886467	82886113	82886187	82893423	82893582	21777	245175	162192	380446	77,59	198	99	0	0	0.431,0.313	0.712,0.791	-0.38
4568	ENSMUSG00000024844.15	Banf1	chr19	-	5366278	5366606	5366561	5366606	5365817	5365956	4568	6,5	2,2	21,13	1,0	198	99	0.000843995	0.0171099	0.6,0.556	0.913,1.0	-0.378
33673	ENSMUSG00000001017.15	Chtop	chr3	-	90500380	90500514	90500499	90500514	90499694	90500107	33673	10,13	6,6	31,38	1,5	198	99	0.000640484	0.0136234	0.455,0.52	0.939,0.792	-0.378
2616	ENSMUSG00000029106.14	Add1	chr5	+	34616562	34616907	34616562	34616814	34620044	34620134	2616	23,27	13,4	42,27	0,0	192	99	1.24247e-07	8.94007e-06	0.477,0.777	1.0,1.0	-0.373
15605	ENSMUSG00000046434.16	Hnrnpa1	chr15	+	103243958	103244308	103243958	103244028	103246345	103246421	15605	1103983	17781456	10981135	327365	198	99	0	0	0.237,0.252	0.627,0.609	-0.373
15606	ENSMUSG00000046434.16	Hnrnpa1	chr15	+	103243958	103244394	103243958	103244028	103246345	103246421	15606	1103983	17781456	10981135	327365	198	99	0	0	0.237,0.252	0.627,0.609	-0.373
26459	ENSMUSG00000027881.14	Prpf38b	chr3	-	108907772	108907981	108907931	108907981	108905110	108905334	26459	18,23	4,9	49,29	0,0	198	99	2.04407e-08	1.79605e-06	0.692,0.561	1.0,1.0	-0.373
8902	ENSMUSG00000051367.8	Six1	chr12	-	73044988	73045291	73045013	73045291	73043773	73043829	8902	2,3	1,3	11,5	0,1	124	99	0.00118682	0.0221784	0.615,0.444	1.0,0.8	-0.371
9267	ENSMUSG00000052812.5	Atad2b	chr12	+	5013802	5013999	5013802	5013984	5017982	5018142	9267	14,11	17,9	26,26	1,9	114	99	0.000346645	0.00829006	0.417,0.515	0.958,0.715	-0.371
11346	ENSMUSG00000090841.2	Myl6	chr10	-	128493511	128493824	128493808	128493824	128492601	128492745	11346	23,15	4,7	51,31	0,0	198	99	1.47401e-07	1.04721e-05	0.742,0.517	1.0,1.0	-0.371
30279	ENSMUSG00000021109.13	Hif1a	chr12	+	73927985	73928335	73927985	73928131	73930656	73930769	30279	15,10	6,5	15,20	1,1	198	99	0.00056318	0.0122771	0.556,0.5	0.882,0.909	-0.367
9485	ENSMUSG00000020770.13	Unk	chr11	+	116053015	116053249	116053015	116053119	116053489	116053690	9485	19,12	26,33	25,26	8,11	198	99	4.99819e-06	0.000239974	0.268,0.154	0.61,0.542	-0.365
17281	ENSMUSG00000027424.11	Mgme1	chr2	+	144270940	144271343	144270940	144270947	144271914	144272484	17281	3,4	26,21	18,24	12,15	198	99	1.0274e-08	9.42098e-07	0.055,0.087	0.429,0.444	-0.365
5350	ENSMUSG00000015474.16	Ppt2	chr17	-	34627246	34627581	34627324	34627581	34626804	34626995	5350	9,12	115112	45,23	22,31	177	99	1.68807e-11	2.80327e-09	0.042,0.057	0.534,0.293	-0.364
30616	ENSMUSG00000063511.11	Snrnp70	chr7	-	45383112	45383184	45383124	45383184	45380716	45380818	30616	2,1	5,9	35,12	22,11	111	99	0.000528248	0.011677	0.263,0.09	0.587,0.493	-0.364
5341	ENSMUSG00000015474.16	Ppt2	chr17	-	34627121	34627581	34627324	34627581	34626804	34626995	5341	11,15	115112	51,26	22,31	198	99	2.9841e-11	4.7398e-09	0.046,0.063	0.537,0.295	-0.362
5345	ENSMUSG00000015474.16	Ppt2	chr17	-	34627165	34627581	34627324	34627581	34626804	34626995	5345	11,15	115112	51,26	22,31	198	99	2.9841e-11	4.7398e-09	0.046,0.063	0.537,0.295	-0.362
5348	ENSMUSG00000015474.16	Ppt2	chr17	-	34627175	34627581	34627324	34627581	34626804	34626995	5348	11,15	115112	51,26	22,31	198	99	2.9841e-11	4.7398e-09	0.046,0.063	0.537,0.295	-0.362
30397	ENSMUSG00000046364.14	Rpl27a	chr7	+	109519584	109519917	109519584	109519648	109520467	109520642	30397	71,58	85,51	241158	52,37	198	99	2.66454e-15	7.3087e-13	0.295,0.362	0.699,0.681	-0.361
28938	ENSMUSG00000027649.15	Ctnnbl1	chr2	+	157774410	157774700	157774410	157774602	157779811	157779918	28938	0,0	4,6	11,5	9,5	197	99	1.85702e-06	9.91162e-05	0.0,0.0	0.381,0.334	-0.358
751	ENSMUSG00000020770.13	Unk	chr11	+	116053015	116053158	116053015	116053119	116053489	116053690	751	43,30	26,33	54,72	8,11	138	99	3.16791e-07	2.06038e-05	0.543,0.395	0.829,0.824	-0.357
30398	ENSMUSG00000046364.14	Rpl27a	chr7	+	109519584	109520023	109519584	109519648	109520467	109520642	30398	71,60	85,51	240159	52,37	198	99	1.4877e-14	3.69512e-12	0.295,0.37	0.698,0.682	-0.357
929	ENSMUSG00000025354.5	Dnajc14	chr10	+	128805675	128805726	128805675	128805714	128806167	128807620	929	3,3	12,16	21,21	22,14	111	99	0.000132555	0.00382275	0.182,0.143	0.46,0.572	-0.354
2428	ENSMUSG00000027014.14	Cwc22	chr2	-	77903795	77904034	77903813	77904034	77895765	77896578	2428	43,45	86102	100,71	29,53	117	99	8.43276e-07	4.91012e-05	0.297,0.272	0.745,0.531	-0.354
7142	ENSMUSG00000024346.6	Pfdn1	chr18	-	36416874	36417030	36416946	36417030	36404204	36404460	7142	1,0	1,1	6,2	3,1	171	99	0.00193649	0.0325785	0.367,0.0	0.537,0.537	-0.354
6104	ENSMUSG00000021018.8	Polr2h	chr16	+	20718990	20719089	20718990	20719084	20721909	20722267	6104	7,3	19,6	22,16	13,8	104	99	0.000490439	0.011011	0.26,0.322	0.617,0.656	-0.346
25695	ENSMUSG00000033285.15	Wdr3	chr3	-	100162012	100162332	100162282	100162332	100161019	100161222	25695	1,0	1,1	9,3	2,3	198	99	0.00182294	0.0310825	0.333,0.0	0.692,0.333	-0.346
33974	ENSMUSG00000032178.14	Ilf3	chr9	+	21387703	21388150	21387703	21387797	21388508	21388753	33974	15,15	33,27	47,18	13,11	198	99	1.97062e-05	0.00077123	0.185,0.217	0.644,0.45	-0.346
14277	ENSMUSG00000009418.16	Nav1	chr1	-	135453832	135454142	135454044	135454142	135453192	135453288	14277	13,2	17,11	19,9	7,5	198	99	0.00194061	0.0326304	0.277,0.083	0.576,0.474	-0.345
25962	ENSMUSG00000027285.13	Haus2	chr2	+	120609594	120609673	120609594	120609658	120612337	120612430	25962	0,0	2,4	2,5	6,5	114	99	2.87265e-05	0.00107619	0.0,0.0	0.224,0.465	-0.345
14984	ENSMUSG00000028809.16	Srrm1	chr4	-	135329003	135329490	135329372	135329490	135324818	135325280	14984	9,14	5,2	31,22	1,0	198	99	7.20834e-05	0.00230318	0.474,0.778	0.939,1.0	-0.344
32826	ENSMUSG00000038215.15	Cep44	chr8	-	56550719	56550799	56550763	56550799	56547387	56547524	32826	0,0	6,2	7,1	3,9	143	99	0.000254834	0.00637469	0.0,0.0	0.618,0.071	-0.344
34512	ENSMUSG00000032399.8	Rpl4	chr9	+	64173374	64173629	64173374	64173622	64174823	64174995	34512	1,2	11,4	8,11	9,6	106	99	0.00277898	0.0434823	0.078,0.318	0.454,0.631	-0.344
8882	ENSMUSG00000056459.14	Zbtb25	chr12	-	76368999	76369464	76369337	76369464	76355888	76356068	8882	31,45	19,10	50,36	0,4	198	99	6.95467e-05	0.00224313	0.449,0.692	1.0,0.818	-0.339
21326	ENSMUSG00000044328.13	Trp53i13	chr11	-	77512321	77512694	77512667	77512694	77509597	77509726	21326	6,5	25,17	11,9	7,5	198	99	0.000101904	0.00309083	0.107,0.128	0.44,0.474	-0.339
28028	ENSMUSG00000054823.16	Nsd3	chr8	+	25648440	25648540	25648440	25648512	25659740	25659895	28028	6,10	6,1	2,7	0,0	127	99	0.00010085	0.00306869	0.438,0.886	1.0,1.0	-0.338
5184	ENSMUSG00000002831.14	Plin4	chr17	-	56108517	56108646	56108587	56108646	56106116	56107374	5184	1,0	19,11	5,12	4,18	169	99	8.19888e-07	4.80717e-05	0.03,0.0	0.423,0.281	-0.337
15945	ENSMUSG00000053192.9	Mllt11	chr3	-	95229994	95230472	95230370	95230472	95229051	95229205	15945	1,0	1,5	11,3	8,1	198	99	0.000409161	0.00952516	0.333,0.0	0.407,0.6	-0.337
18451	ENSMUSG00000075000.11	Nrbf2	chr10	-	67271221	67271446	67271399	67271446	67270105	67270146	18451	7,10	7,0	7,6	0,0	198	99	0.00114714	0.0215517	0.333,1.0	1.0,1.0	-0.334
20249	ENSMUSG00000030447.15	Cyfip1	chr7	+	55873445	55873725	55873445	55873523	55874906	55875088	20249	5,6	5,0	8,5	0,0	198	99	0.00237488	0.0382015	0.333,1.0	1.0,1.0	-0.334
24078	ENSMUSG00000037652.15	Phc3	chr3	-	30935951	30936437	30936284	30936437	30931738	30931892	24078	2,3	32,36	4,7	8,3	198	99	0.000153254	0.00428568	0.03,0.04	0.2,0.538	-0.334
12258	ENSMUSG00000029314.14	Gpat3	chr5	+	100845712	100846084	100845712	100845793	100846654	100846948	12258	0,0	6,8	4,1	4,1	198	99	0.000251974	0.00631741	0.0,0.0	0.333,0.333	-0.333
14708	ENSMUSG00000028435.8	Aqp3	chr4	-	41094515	41094838	41094700	41094838	41094265	41094384	14708	1,0	4,4	7,8	5,7	198	99	0.000103831	0.00314322	0.111,0.0	0.412,0.364	-0.333
31921	ENSMUSG00000034317.14	Trim59	chr3	-	69044257	69044723	69044405	69044723	69043788	69043842	31921	6,5	26,26	18,18	26,6	198	99	0.000561463	0.0122566	0.103,0.088	0.257,0.6	-0.333
14582	ENSMUSG00000049299.14	Trappc1	chr11	+	69324141	69324465	69324141	69324256	69325438	69325793	14582	21,24	7,5	54,54	1,0	198	99	1.851e-07	1.2693e-05	0.6,0.706	0.964,1.0	-0.329
4893	ENSMUSG00000117694.1	Gm28285	chr18	+	35557336	35557396	35557336	35557369	35577557	35577619	4893	69,44	52,32	233174	28,31	126	99	1.48881e-13	3.30725e-11	0.51,0.519	0.867,0.815	-0.327
24126	ENSMUSG00000061136.14	Prpf40a	chr2	-	53159262	53159695	53159557	53159695	53156622	53156985	24126	30,31	9,6	40,37	0,0	198	99	4.70156e-08	3.8125e-06	0.625,0.721	1.0,1.0	-0.327
4889	ENSMUSG00000117694.1	Gm28285	chr18	+	35557336	35557422	35557336	35557369	35571842	35572285	4889	126,83	102,88	456398	86109	152	99	1.11022e-16	3.50209e-14	0.446,0.381	0.775,0.704	-0.326
28929	ENSMUSG00000106447.1	Gm42957	chr3	+	96635473	96635739	96635473	96635500	96636673	96636789	28929	18,14	15,17	18,25	6,5	198	99	0.00103933	0.0200272	0.375,0.292	0.6,0.714	-0.324
32745	ENSMUSG00000050914.16	Ankrd37	chr8	-	45999502	45999867	45999650	45999867	45999250	45999403	32745	539487	377334	668599	125,97	198	99	0	0	0.417,0.422	0.728,0.755	-0.322
700	ENSMUSG00000021027.17	Ralgapa1	chr12	-	55721405	55722941	55722773	55722941	55719583	55719708	700	46,24	40,45	55,62	16,22	198	99	7.65003e-06	0.000343962	0.365,0.211	0.632,0.585	-0.321
146	ENSMUSG00000117694.1	Gm28285	chr18	+	35557336	35557405	35557336	35557391	35577557	35577619	146	41,21	14,21	185130	10,15	113	99	1.22137e-06	6.94178e-05	0.72,0.467	0.942,0.884	-0.32
12485	ENSMUSG00000029213.11	Commd8	chr5	-	72167962	72168156	72168071	72168156	72165350	72165506	12485	12,14	8,1	98101	2,1	198	99	0.00018207	0.00488589	0.429,0.875	0.961,0.981	-0.319
14107	ENSMUSG00000047909.11	Ankrd16	chr2	+	11779676	11780128	11779676	11780084	11781476	11783756	14107	0,0	3,4	3,2	7,2	143	99	0.00060923	0.0130643	0.0,0.0	0.229,0.409	-0.319
9396	ENSMUSG00000025377.14	Tepsin	chr11	-	120097483	120097581	120097508	120097581	120096877	120096969	9396	1,0	15,8	8,6	8,15	124	99	1.96846e-05	0.00077123	0.051,0.0	0.444,0.242	-0.317
23885	ENSMUSG00000006395.16	Hyi	chr4	+	118359998	118360439	118359998	118360231	118361615	118361730	23885	11,5	49,37	22,24	29,11	198	99	9.47873e-06	0.000414698	0.101,0.063	0.275,0.522	-0.317
6079	ENSMUSG00000000134.17	Tfe3	chrX	+	7763948	7764160	7763948	7763998	7765506	7765620	6079	3,3	19,5	21,14	7,14	198	99	0.000611981	0.0131143	0.073,0.231	0.6,0.333	-0.315
31311	ENSMUSG00000064307.13	Lrrc51	chr7	-	101933749	101933830	101933823	101933830	101920636	101920774	31311	6,10	2,2	7,1	0,0	173	99	0.00204692	0.034019	0.632,0.741	1.0,1.0	-0.314
33291	ENSMUSG00000036712.15	Cyld	chr8	+	88697046	88697193	88697046	88697099	88702304	88702438	33291	0,0	3,6	10,7	9,10	193	99	7.64163e-06	0.000343962	0.0,0.0	0.363,0.264	-0.314
32749	ENSMUSG00000050914.16	Ankrd37	chr8	-	45999570	45999867	45999650	45999867	45999250	45999403	32749	471434	377334	559502	125,97	179	99	0	0	0.409,0.418	0.712,0.741	-0.313
19527	ENSMUSG00000028541.14	B4galt2	chr4	-	117874341	117874637	117874393	117874637	117873301	117874003	19527	1,1	18,15	2,3	3,3	151	99	0.00303436	0.046519	0.035,0.042	0.304,0.396	-0.311
2039	ENSMUSG00000024163.17	Mapk8ip3	chr17	-	24906146	24906228	24906173	24906228	24905167	24905298	2039	291239	161104	130,69	9,4	126	99	1.22125e-15	3.50209e-13	0.587,0.644	0.919,0.931	-0.31
145	ENSMUSG00000117694.1	Gm28285	chr18	+	35557336	35557405	35557336	35557369	35577557	35577619	145	98,59	52,32	373274	28,31	135	99	2.22045e-16	6.86684e-14	0.58,0.575	0.907,0.866	-0.309
4564	ENSMUSG00000024844.15	Banf1	chr19	-	5366173	5366606	5366433	5366606	5365817	5365956	4564	12,10	11,20	49,58	22,16	198	99	0.000331127	0.00797333	0.353,0.2	0.527,0.644	-0.309
13976	ENSMUSG00000063245.11	Zfp993	chr4	+	146644458	146644527	146644458	146644504	146654898	146654956	13976	0,0	5,3	9,3	10,10	122	99	2.98352e-05	0.0011059	0.0,0.0	0.422,0.196	-0.309
14395	ENSMUSG00000025967.16	Eef1b2	chr1	+	63177773	63178264	63177773	63177876	63178422	63178565	14395	25,30	15,5	233163	16,5	198	99	0.000131167	0.00379589	0.455,0.75	0.879,0.942	-0.308
21872	ENSMUSG00000038564.11	Ift172	chr5	-	31285920	31286117	31286077	31286117	31285762	31285828	21872	2,3	96,75	23,20	24,21	198	99	0	0	0.01,0.02	0.324,0.323	-0.308
23450	ENSMUSG00000054766.13	Set	chr2	+	30068943	30069413	30068943	30069102	30069517	30069631	23450	12,20	4,4	53,39	2,0	198	99	0.000137266	0.00391849	0.6,0.714	0.93,1.0	-0.308
2739	ENSMUSG00000030815.11	Phkg2	chr7	+	127577534	127578029	127577534	127577688	127579666	127579732	2739	58,43	26,11	159147	11,6	198	99	4.04412e-08	3.31345e-06	0.527,0.662	0.878,0.925	-0.307
8039	ENSMUSG00000069206.14	Zfp874a	chr13	-	67451315	67451580	67451390	67451580	67449349	67449476	8039	1,0	2,4	7,11	7,7	174	99	0.000273678	0.00675501	0.221,0.0	0.363,0.472	-0.307
14394	ENSMUSG00000025967.16	Eef1b2	chr1	+	63177773	63178254	63177773	63177876	63178422	63178565	14394	24,32	15,5	231165	16,5	198	99	0.000242232	0.00614225	0.444,0.762	0.878,0.943	-0.307
21687	ENSMUSG00000026020.9	Nop58	chr1	+	59684970	59685230	59684970	59685114	59690485	59690989	21687	0,0	6,7	1,4	4,2	198	99	0.00133242	0.0242246	0.0,0.0	0.111,0.5	-0.305
14392	ENSMUSG00000025967.16	Eef1b2	chr1	+	63177722	63178208	63177722	63177876	63178422	63178565	14392	25,31	15,5	231163	16,5	198	99	0.000178756	0.0048194	0.455,0.756	0.878,0.942	-0.304
34139	ENSMUSG00000063524.13	Eno1	chr4	+	150238014	150238447	150238014	150238364	150239472	150239936	34139	7,2	28,7	13,16	12,9	182	99	0.000167068	0.00458214	0.12,0.135	0.371,0.492	-0.304
28482	ENSMUSG00000001436.15	Slc19a1	chr10	+	77044622	77045107	77044622	77044720	77049539	77050432	28482	0,0	2,1	11,6	11,8	198	99	8.39253e-05	0.00261337	0.0,0.0	0.333,0.273	-0.303
31299	ENSMUSG00000032737.13	Inppl1	chr7	-	101837888	101838229	101838152	101838229	101836570	101836951	31299	7,14	6,2	6,9	1,0	198	99	0.00130984	0.0238693	0.368,0.778	0.75,1.0	-0.302
34490	ENSMUSG00000032249.14	Anp32a	chr9	+	62344798	62344993	62344798	62344887	62371719	62371869	34490	0,0	2,4	5,5	4,9	198	99	5.55304e-05	0.00184579	0.0,0.0	0.385,0.217	-0.301
844	ENSMUSG00000047284.14	Neurl4	chr11	+	69903007	69903719	69903007	69903452	69903864	69904163	844	134,93	33,22	130111	0,3	198	99	5.61773e-14	1.31071e-11	0.67,0.679	1.0,0.949	-0.3
14451	ENSMUSG00000042625.16	Safb2	chr17	-	56570933	56571319	56571204	56571319	56568990	56569022	14451	0,0	5,3	8,1	6,2	198	99	1.95238e-05	0.000768393	0.0,0.0	0.4,0.2	-0.3
23090	ENSMUSG00000035161.7	Ints6	chr14	-	62700630	62700862	62700660	62700862	62696592	62696955	23090	34,39	49,38	68121	25,38	129	99	2.0311e-07	1.3808e-05	0.347,0.441	0.676,0.71	-0.299
27765	ENSMUSG00000018849.6	Wwc1	chr11	-	35889259	35889406	35889289	35889406	35888062	35888136	27765	23,22	12,4	67,80	0,0	129	99	8.24236e-10	9.45444e-08	0.595,0.808	1.0,1.0	-0.298
2466	ENSMUSG00000025237.16	Parp6	chr9	+	59641023	59641810	59641023	59641096	59648829	59648909	2466	18,12	58,78	43,34	26,32	198	99	3.54377e-10	4.45357e-08	0.134,0.071	0.453,0.347	-0.297
4888	ENSMUSG00000117694.1	Gm28285	chr18	+	35557336	35557396	35557336	35557369	35571842	35572285	4888	69,47	102,88	230174	86109	126	99	5.23892e-09	5.10051e-07	0.347,0.296	0.678,0.556	-0.295
6615	ENSMUSG00000061360.8	Phf5a	chr15	-	81870209	81870409	81870325	81870409	81865685	81865892	6615	0,1	1,3	4,1	3,1	198	99	0.00294371	0.0455401	0.0,0.143	0.4,0.333	-0.295
14443	ENSMUSG00000026851.9	BC005624	chr2	-	30981482	30981542	30981487	30981542	30978894	30978965	14443	13,17	10,8	32,27	4,2	104	99	0.000203146	0.00533558	0.553,0.669	0.884,0.928	-0.295
6125	ENSMUSG00000022841.15	Ap2m1	chr16	+	20540334	20540813	20540334	20540415	20540974	20541110	6125	1000857	580558	9471208	180190	198	99	0	0	0.463,0.434	0.725,0.761	-0.294
6460	ENSMUSG00000003352.14	Cacnb3	chr15	+	98640341	98640779	98640341	98640750	98641176	98641257	6460	4,1	39,31	18,3	15,9	128	99	2.991e-05	0.00110737	0.073,0.024	0.481,0.205	-0.294
1654	ENSMUSG00000027405.16	Nop56	chr2	+	130277031	130277314	130277031	130277132	130277475	130277624	1654	142119	730643	43363676	31473366	198	99	0	0	0.089,0.085	0.408,0.353	-0.293
2348	ENSMUSG00000021288.18	Klc1	chr12	+	111789324	111789486	111789324	111789459	111806007	111806074	2348	61,35	40,18	141205	19,22	126	99	1.27169e-10	1.76715e-08	0.545,0.604	0.854,0.88	-0.292
4414	ENSMUSG00000071653.9	1810009A15Rik	chr19	+	8889123	8889727	8889123	8889318	8890002	8890100	4414	5,5	9,5	87,42	25,21	198	99	0.00325605	0.049096	0.217,0.333	0.635,0.5	-0.292
31362	ENSMUSG00000030929.17	Eri2	chr7	-	119787403	119787746	119787733	119787746	119786738	119786827	31362	17,20	7,13	134110	20,14	198	99	0.00029613	0.00722437	0.548,0.435	0.77,0.797	-0.292
2415	ENSMUSG00000044308.17	Ubr3	chr2	+	69991424	69991637	69991424	69991625	69993675	69993812	2415	47,48	117113	47,48	38,29	111	99	3.22818e-08	2.72272e-06	0.264,0.275	0.525,0.596	-0.291
26935	ENSMUSG00000034211.14	Mrps17	chr5	+	129715683	129715858	129715683	129715794	129716726	129716866	26935	13,12	20,16	87100	41,38	163	99	4.03388e-05	0.00141856	0.283,0.313	0.563,0.615	-0.291
32755	ENSMUSG00000050914.16	Ankrd37	chr8	-	45999754	45999867	45999858	45999867	45999250	45999403	32755	32,17	60,52	43,28	28,14	198	99	6.29169e-07	3.81664e-05	0.211,0.14	0.434,0.5	-0.291
4894	ENSMUSG00000117694.1	Gm28285	chr18	+	35557336	35557422	35557336	35557369	35577557	35577619	4894	123,82	52,32	458396	28,31	152	99	0	0	0.606,0.625	0.914,0.893	-0.288
4926	ENSMUSG00000042834.15	Nrep	chr18	-	33463741	33464029	33463852	33464029	33463377	33463419	4926	0,0	16,2	2,6	4,5	198	99	1.53963e-05	0.000627468	0.0,0.0	0.2,0.375	-0.287
4985	ENSMUSG00000049411.15	Tmem241	chr18	-	12065536	12065770	12065751	12065770	12064203	12064239	4985	0,0	1,1	1,6	3,4	198	99	0.00015377	0.00429631	0.0,0.0	0.143,0.429	-0.286
170	ENSMUSG00000024073.16	Birc6	chr17	+	74618435	74619838	74618435	74618563	74622035	74622251	170	93,79	29,9	73106	0,0	198	99	4.72566e-11	7.13236e-09	0.616,0.814	1.0,1.0	-0.285
6999	ENSMUSG00000022412.14	Mief1	chr15	+	80234310	80234780	80234310	80234558	80235804	80236153	6999	60,54	15,16	86,80	3,3	198	99	2.06334e-07	1.3997e-05	0.667,0.628	0.935,0.93	-0.285
12824	ENSMUSG00000043510.12	Hscb	chr5	-	110839697	110839777	110839748	110839777	110836306	110836403	12824	0,0	5,5	6,2	7,5	150	99	3.33308e-05	0.00121128	0.0,0.0	0.361,0.209	-0.285
2088	ENSMUSG00000026605.14	Cenpf	chr1	-	189684862	189685138	189684944	189685138	189682844	189682951	2088	13,7	2,2	18,26	0,0	181	99	0.0025804	0.0409437	0.78,0.657	1.0,1.0	-0.281
1229	ENSMUSG00000048677.9	Tpcn2	chr7	-	145260026	145260138	145260088	145260138	145258514	145258614	1229	0,0	5,4	8,5	8,14	161	99	4.1864e-05	0.00145918	0.0,0.0	0.381,0.18	-0.28
18888	ENSMUSG00000079658.9	Eloc	chr1	-	16656362	16656459	16656381	16656459	16647954	16648007	18888	0,1	2,2	20,12	17,18	118	99	0.00161766	0.0283609	0.0,0.296	0.497,0.359	-0.28
19670	ENSMUSG00000032741.9	Tpcn1	chr5	-	120588445	120588594	120588487	120588594	120585184	120585428	19670	0,0	13,7	6,1	6,4	141	99	3.72685e-05	0.00133288	0.0,0.0	0.412,0.149	-0.28
18745	ENSMUSG00000026281.15	Dtymk	chr1	-	93801738	93801906	93801790	93801906	93800801	93800910	18745	0,0	3,1	7,6	11,11	151	99	0.000112561	0.00334784	0.0,0.0	0.294,0.263	-0.278
22387	ENSMUSG00000024740.10	Ddb1	chr19	+	10609791	10609974	10609791	10609827	10610701	10610816	22387	59,61	282248	111,84	72,87	198	99	1.11022e-16	3.50209e-14	0.095,0.11	0.435,0.326	-0.278
30215	ENSMUSG00000001794.13	Capns1	chr7	-	30190299	30190727	30190658	30190727	30190051	30190168	30215	36,21	7,4	36,32	0,0	198	99	1.3363e-06	7.47381e-05	0.72,0.724	1.0,1.0	-0.278
31302	ENSMUSG00000030649.18	Anapc15	chr7	+	101896339	101896813	101896339	101896725	101897732	101898227	31302	9,5	6,0	2,3	0,0	187	99	0.00087999	0.0176356	0.443,1.0	1.0,1.0	-0.278
1610	ENSMUSG00000000823.16	Zfp512b	chr2	-	181588624	181588801	181588654	181588801	181588395	181588520	1610	0,0	6,6	9,16	36,19	129	99	2.2539e-05	0.000867038	0.0,0.0	0.161,0.393	-0.277
7333	ENSMUSG00000021945.9	Zmym2	chr14	+	56886652	56886956	56886652	56886698	56887794	56887857	7333	51,48	102,76	136,94	55,60	198	99	7.98443e-09	7.40767e-07	0.2,0.24	0.553,0.439	-0.276
9810	ENSMUSG00000078700.10	D030028A08Rik	chr11	+	96944164	96944279	96944164	96944214	96944844	96945093	9810	0,0	4,2	5,3	4,13	164	99	0.000222414	0.00572722	0.0,0.0	0.43,0.122	-0.276
22458	ENSMUSG00000063229.15	Ldha	chr7	+	46847241	46847496	46847241	46847388	46847595	46847745	22458	88,74	53,34	236166	32,29	198	99	4.49216e-09	4.45599e-07	0.454,0.521	0.787,0.741	-0.276
22702	ENSMUSG00000040331.16	Nsmce4a	chr7	-	130539660	130539965	130539894	130539965	130539010	130539110	22702	120,88	28,30	284315	13,15	198	99	6.87106e-12	1.26012e-09	0.682,0.595	0.916,0.913	-0.276
32610	ENSMUSG00000031583.13	Wrn	chr8	-	33385080	33385527	33385451	33385527	33353294	33353399	32610	35,29	20,19	63,80	21,7	198	99	0.00290715	0.045063	0.467,0.433	0.6,0.851	-0.276
9369	ENSMUSG00000025137.15	Pcyt2	chr11	-	120612845	120613083	120613029	120613083	120612480	120612601	9369	11,10	18,24	238139	107,93	198	99	7.04701e-06	0.000324039	0.234,0.172	0.527,0.428	-0.275
28323	ENSMUSG00000005069.12	Pex5	chr6	-	124414006	124414355	124414286	124414355	124413568	124413701	28323	325310	71,56	226206	1,1	198	99	0	0	0.696,0.735	0.991,0.99	-0.275
30320	ENSMUSG00000038535.17	Zfp280d	chr9	+	72329509	72329821	72329509	72329610	72330865	72331173	30320	13,14	1,5	56,43	0,0	198	99	2.73639e-05	0.00103621	0.867,0.583	1.0,1.0	-0.275
11952	ENSMUSG00000022443.17	Myh9	chr15	-	77841939	77842047	77841962	77842047	77812879	77813231	11952	7,14	5,1	3,8	0,0	122	99	0.000199755	0.00527727	0.532,0.919	1.0,1.0	-0.274
2613	ENSMUSG00000078923.10	Ube2v1	chr2	-	167629068	167629288	167629169	167629288	167617828	167617977	2613	23,14	33,22	31,17	10,11	198	99	0.00154454	0.0273099	0.258,0.241	0.608,0.436	-0.273
7158	ENSMUSG00000022529.11	Zfp263	chr16	+	3746421	3746834	3746421	3746495	3748148	3748265	7158	19,12	4,2	52,31	0,0	198	99	3.93171e-05	0.00139038	0.704,0.75	1.0,1.0	-0.273
11614	ENSMUSG00000036676.14	Tmtc3	chr10	-	100485050	100485185	100485065	100485185	100477975	100478022	11614	10,4	3,2	13,14	0,1	114	99	0.00177809	0.0304705	0.743,0.635	1.0,0.924	-0.273
11629	ENSMUSG00000005682.9	Pan2	chr10	+	128317893	128318342	128317893	128318033	128318944	128319038	11629	49,39	10,13	55,60	0,5	198	99	7.61664e-05	0.00240982	0.71,0.6	1.0,0.857	-0.273
26452	ENSMUSG00000069094.12	Pde7a	chr3	-	19241145	19241536	19241341	19241536	19236443	19236539	26452	42,39	5,14	176185	3,3	198	99	1.64822e-07	1.14519e-05	0.808,0.582	0.967,0.969	-0.273
4314	ENSMUSG00000024776.17	Stambpl1	chr19	+	34192821	34192943	34192821	34192919	34220186	34220266	4314	2,1	23,19	10,16	27,18	123	99	4.33866e-05	0.00150065	0.065,0.041	0.23,0.417	-0.271
28797	ENSMUSG00000051256.10	Jagn1	chr6	+	113442568	113442797	113442568	113442629	113447257	113448229	28797	29,41	7,12	570501	22,23	198	99	2.92632e-07	1.91908e-05	0.674,0.631	0.928,0.916	-0.269
30319	ENSMUSG00000038535.17	Zfp280d	chr9	+	72329509	72329817	72329509	72329610	72330865	72331173	30319	15,14	1,5	54,43	0,0	198	99	3.87764e-05	0.00137589	0.882,0.583	1.0,1.0	-0.268
144	ENSMUSG00000117694.1	Gm28285	chr18	+	35557336	35557391	35557336	35557369	35577557	35577619	144	71,59	52,32	198159	28,31	121	99	1.20296e-09	1.33144e-07	0.528,0.601	0.853,0.808	-0.266
15	ENSMUSG00000041353.12	Tmem29	chrX	-	150458961	150459154	150459071	150459154	150420341	150420441	15	166160	205213	577495	256195	198	99	1.11022e-16	3.50209e-14	0.288,0.273	0.53,0.559	-0.264
21047	ENSMUSG00000040187.15	Arntl2	chr6	+	146825166	146825276	146825166	146825228	146828098	146828186	21047	0,0	2,1	5,4	8,9	147	99	0.000210469	0.00548682	0.0,0.0	0.296,0.23	-0.263
2530	ENSMUSG00000025969.15	Nrp2	chr1	+	62786280	62786316	62786280	62786301	62815332	62818695	2530	19,27	255207	12,31	26,40	114	99	4.29818e-10	5.29617e-08	0.061,0.102	0.286,0.402	-0.262
23663	ENSMUSG00000048758.14	Rpl29	chr9	+	106429969	106430423	106429969	106430014	106431068	106431568	23663	11,28	3,8	82,47	2,4	198	99	0.000692231	0.0144703	0.647,0.636	0.953,0.855	-0.262
27777	ENSMUSG00000074165.10	Zfp788	chr7	+	41634647	41634745	41634647	41634710	41647482	41647617	27777	0,1	4,5	8,9	12,14	134	99	0.000405786	0.00946754	0.0,0.129	0.33,0.322	-0.262
28700	ENSMUSG00000030061.16	Uba3	chr6	-	97204914	97205347	97205102	97205347	97203473	97203594	28700	0,1	6,3	23,15	23,15	198	99	5.79103e-05	0.0019088	0.0,0.143	0.333,0.333	-0.262
32652	ENSMUSG00000031585.13	Gtf2e2	chr8	+	33732338	33732686	33732338	33732515	33735733	33735906	32652	123137	54,36	66,63	1,11	198	99	0.000534784	0.0117884	0.532,0.656	0.971,0.741	-0.262
25740	ENSMUSG00000033862.7	Cdk10	chr8	+	123224853	123225256	123224853	123224930	123226346	123226419	25740	9,12	16,11	60,44	25,18	198	99	0.00171182	0.0296314	0.22,0.353	0.545,0.55	-0.261
33752	ENSMUSG00000027752.15	Exosc8	chr3	-	54733923	54734313	54734295	54734313	54733657	54733731	33752	20,20	5,6	36,21	2,1	198	99	0.00287797	0.0446986	0.667,0.625	0.9,0.913	-0.261
172	ENSMUSG00000024059.10	Clip4	chr17	+	71828506	71828705	71828506	71828650	71831204	71831339	172	0,2	10,4	11,7	6,16	154	99	0.00223386	0.0363972	0.0,0.243	0.541,0.22	-0.259
32653	ENSMUSG00000031585.13	Gtf2e2	chr8	+	33732338	33732798	33732338	33732515	33735733	33735906	32653	124138	54,36	66,62	1,11	198	99	0.000651387	0.0138087	0.534,0.657	0.971,0.738	-0.259
2040	ENSMUSG00000024163.17	Mapk8ip3	chr17	-	24917994	24918136	24918087	24918136	24914458	24914705	2040	535501	129107	101,74	4,1	192	99	3.03925e-10	3.86573e-08	0.681,0.707	0.929,0.974	-0.258
9785	ENSMUSG00000001441.13	Npepps	chr11	-	97241733	97242047	97241950	97242047	97240928	97241043	9785	27,30	4,6	9,2	0,0	198	99	0.00013258	0.00382275	0.771,0.714	1.0,1.0	-0.258
2736	ENSMUSG00000030815.11	Phkg2	chr7	+	127577534	127577710	127577534	127577646	127579666	127579732	2736	46,32	12,23	85,91	12,9	163	99	0.0010958	0.0207799	0.7,0.458	0.811,0.86	-0.257
33425	ENSMUSG00000014786.8	Slc9a5	chr8	+	105355470	105355742	105355470	105355549	105355846	105356024	33425	1,5	13,26	9,15	20,9	198	99	0.00103289	0.0199971	0.037,0.088	0.184,0.455	-0.257
155	ENSMUSG00000024293.16	Esco1	chr18	-	10593745	10595875	10595675	10595875	10584247	10584362	155	40,41	8,6	120156	0,0	198	99	5.09622e-10	6.1592e-08	0.714,0.774	1.0,1.0	-0.256
1100	ENSMUSG00000029060.17	Mib2	chr4	-	155658893	155659265	155659122	155659265	155657854	155657959	1100	77,62	26,17	73,93	4,8	198	99	6.26963e-06	0.000289907	0.597,0.646	0.901,0.853	-0.256
2768	ENSMUSG00000032827.15	Ppp1r9a	chr6	+	5154008	5154318	5154008	5154207	5156120	5156240	2768	2,2	15,17	43,7	20,28	198	99	0.00176406	0.0303276	0.062,0.056	0.518,0.111	-0.256
33023	ENSMUSG00000007610.15	Gtpbp3	chr8	+	71491996	71492401	71491996	71492353	71492538	71493400	33023	0,1	10,5	3,6	4,10	147	99	0.000256705	0.00640626	0.0,0.119	0.336,0.288	-0.253
20317	ENSMUSG00000029319.8	Coq2	chr5	-	100665869	100666157	100666067	100666157	100663579	100663701	20317	0,0	1,2	4,3	3,13	198	99	0.000799662	0.0163689	0.0,0.0	0.4,0.103	-0.252
8829	ENSMUSG00000092232.1	Gm20521	chr14	+	54883440	54883704	54883440	54883506	54883796	54883884	8829	14,16	85,66	58,62	61,55	198	99	7.94098e-12	1.42324e-09	0.076,0.108	0.322,0.36	-0.249
17652	ENSMUSG00000039086.9	Ss18l1	chr2	+	180055018	180055195	180055018	180055163	180055700	180055898	17652	0,0	45,26	2,12	11,15	131	99	1.72897e-07	1.19823e-05	0.0,0.0	0.121,0.377	-0.249
18984	ENSMUSG00000010608.15	Rbm25	chr12	+	83635401	83635803	83635401	83635481	83639127	83639375	18984	1,0	7,4	6,2	10,2	198	99	0.000758047	0.0156491	0.067,0.0	0.231,0.333	-0.249
25530	ENSMUSG00000029802.13	Abcg2	chr6	+	58635496	58635680	58635496	58635661	58655637	58655856	25530	0,0	3,1	4,6	12,13	118	99	0.00021174	0.00551084	0.0,0.0	0.219,0.279	-0.249
28383	ENSMUSG00000026991.20	Pkp4	chr2	+	59305065	59305197	59305065	59305191	59305304	59305492	28383	61,73	94,52	145142	43,61	105	99	0.000119707	0.00352572	0.38,0.57	0.761,0.687	-0.249
34552	ENSMUSG00000041064.13	Pif1	chr9	+	65588948	65589340	65588948	65589137	65589450	65589604	34552	21,21	4,3	75,59	0,0	198	99	9.96048e-06	0.000429226	0.724,0.778	1.0,1.0	-0.249
4565	ENSMUSG00000024844.15	Banf1	chr19	-	5366173	5366606	5366561	5366606	5365817	5365956	4565	12,10	2,2	49,58	1,0	198	99	0.00227857	0.0369729	0.75,0.714	0.961,1.0	-0.248
16347	ENSMUSG00000028081.6	Rps3a1	chr3	-	86142215	86142702	86142535	86142702	86141697	86141801	16347	1,0	8,8	12,10	13,16	198	99	1.55301e-05	0.000632104	0.059,0.0	0.316,0.238	-0.248
23664	ENSMUSG00000048758.14	Rpl29	chr9	+	106429969	106430435	106429969	106430014	106431068	106431568	23664	12,29	3,8	82,45	2,4	198	99	0.00106844	0.0203398	0.667,0.644	0.953,0.849	-0.246
25421	ENSMUSG00000001248.15	Gramd1a	chr7	-	31135519	31135739	31135557	31135739	31134413	31134517	25421	11,15	4,2	67,48	0,0	137	99	6.36471e-05	0.00206765	0.665,0.844	1.0,1.0	-0.246
20457	ENSMUSG00000026309.14	Ilkap	chr1	-	91388319	91388446	91388354	91388446	91387214	91387341	20457	11,12	54,44	27,37	36,36	134	99	4.89293e-06	0.000235998	0.131,0.168	0.357,0.432	-0.245
2092	ENSMUSG00000029062.14	Cdk11b	chr4	+	155625530	155625773	155625530	155625654	155626773	155626889	2092	41,34	168167	87,86	80,85	198	99	3.33067e-16	1.01022e-13	0.109,0.092	0.352,0.336	-0.243
4896	ENSMUSG00000117694.1	Gm28285	chr18	+	35557336	35557422	35557336	35557391	35577557	35577619	4896	66,44	14,21	270252	10,15	130	99	3.08061e-08	2.61222e-06	0.782,0.615	0.954,0.928	-0.243
14654	ENSMUSG00000028455.15	Stoml2	chr4	-	43028946	43029352	43029278	43029352	43028240	43028293	14654	0,2	5,5	17,22	18,22	198	99	0.00099236	0.0194308	0.0,0.167	0.321,0.333	-0.243
2737	ENSMUSG00000030815.11	Phkg2	chr7	+	127577534	127578029	127577534	127577646	127579666	127579732	2737	75,55	12,23	166188	12,9	198	99	6.20196e-05	0.00202311	0.758,0.545	0.874,0.913	-0.242
10244	ENSMUSG00000020849.13	Ywhae	chr11	+	75733147	75733245	75733147	75733203	75751880	75752080	10244	3,2	4,1	5,1	0,1	141	99	0.00299139	0.0460745	0.345,0.584	1.0,0.413	-0.242
16342	ENSMUSG00000028081.6	Rps3a1	chr3	-	86142215	86142702	86142371	86142702	86141697	86141801	16342	1,0	1,2	12,10	9,7	198	99	0.00137522	0.0248596	0.333,0.0	0.4,0.417	-0.242
29912	ENSMUSG00000033773.14	Rpap2	chr5	+	107601730	107601859	107601730	107601845	107601955	107601969	29912	9,15	4,7	16,9	0,2	113	99	0.00152107	0.0270642	0.663,0.652	1.0,0.798	-0.242
11864	ENSMUSG00000035206.10	Sppl2b	chr10	+	80866499	80866715	80866499	80866660	80867399	80868708	11864	2,0	12,6	20,10	28,18	154	99	0.000296718	0.00723313	0.097,0.0	0.315,0.263	-0.241
9911	ENSMUSG00000091228.1	Gm20390	chr11	-	93967902	93968293	93967956	93968293	93965807	93965937	9911	0,0	2,3	4,7	9,13	153	99	0.000154058	0.00429674	0.0,0.0	0.223,0.258	-0.24
21208	ENSMUSG00000042688.16	Mapk6	chr9	-	75409854	75409985	75409867	75409985	75398411	75398751	21208	54,47	14,14	19,31	0,0	112	99	1.02423e-07	7.58414e-06	0.773,0.748	1.0,1.0	-0.24
28051	ENSMUSG00000068039.13	Tcp1	chr17	+	12917797	12918246	12917797	12918168	12919350	12919558	28051	102126	26,36	155189	8,10	177	99	1.23077e-09	1.35746e-07	0.687,0.662	0.916,0.914	-0.24
31431	ENSMUSG00000042404.16	Dennd4b	chr3	+	90279159	90279294	90279159	90279286	90279377	90279543	31431	0,0	13,7	10,0	10,14	107	99	0.000571145	0.0124164	0.0,0.0	0.481,0.0	-0.24
7159	ENSMUSG00000022529.11	Zfp263	chr16	+	3746421	3746853	3746421	3746495	3748148	3748265	7159	22,15	4,2	56,34	0,0	198	99	7.11033e-05	0.00227935	0.733,0.789	1.0,1.0	-0.239
7061	ENSMUSG00000041841.8	Rpl37	chr15	+	5116700	5117055	5116700	5116926	5117286	5117422	7061	27,29	19,18	58,51	12,15	198	99	0.00164101	0.0286781	0.415,0.446	0.707,0.63	-0.238
14655	ENSMUSG00000028455.15	Stoml2	chr4	-	43028951	43029352	43029278	43029352	43028240	43028293	14655	2,0	5,5	17,21	18,22	198	99	0.00112114	0.0211641	0.167,0.0	0.321,0.323	-0.238
25881	ENSMUSG00000008129.14	4930432K21Rik	chr8	+	84148837	84149176	84148837	84148885	84159444	84159607	25881	0,0	2,1	1,5	5,4	198	99	0.000348186	0.00832059	0.0,0.0	0.091,0.385	-0.238
26453	ENSMUSG00000094410.7	Gm38394	chr1	-	133655344	133661318	133661236	133661318	133653972	133654032	26453	25,28	33,28	30,49	11,24	198	99	0.00088309	0.017664	0.275,0.333	0.577,0.505	-0.237
13916	ENSMUSG00000034171.13	Faah	chr4	-	116000646	116000827	116000786	116000827	116000048	116000088	13916	0,0	4,6	8,7	9,18	198	99	4.85227e-05	0.00163876	0.0,0.0	0.308,0.163	-0.235
5506	ENSMUSG00000024188.16	Luc7l	chr17	+	26253973	26254393	26253973	26254044	26255030	26255125	5506	77,65	41,38	236224	47,50	198	99	2.28695e-06	0.000119833	0.484,0.461	0.715,0.691	-0.23
7058	ENSMUSG00000041841.8	Rpl37	chr15	+	5116644	5117055	5116644	5116907	5117286	5117422	7058	0,0	7,7	3,2	3,7	198	99	0.00222267	0.0362522	0.0,0.0	0.333,0.125	-0.229
32614	ENSMUSG00000031583.13	Wrn	chr8	-	33385441	33385527	33385451	33385527	33353294	33353399	32614	0,0	20,19	5,3	21,7	109	99	3.38927e-05	0.00122886	0.0,0.0	0.178,0.28	-0.229
3517	ENSMUSG00000031728.10	Zfp821	chr8	+	109717761	109717906	109717761	109717887	109721194	109721343	3517	30,20	50,34	91,80	50,63	118	99	0.000110416	0.00329825	0.335,0.33	0.604,0.516	-0.228
33333	ENSMUSG00000001062.18	Vps9d1	chr8	-	123248557	123248676	123248613	123248676	123248153	123248206	33333	0,3	39,24	13,10	30,14	155	99	1.0537e-06	6.03227e-05	0.0,0.074	0.217,0.313	-0.228
2305	ENSMUSG00000032280.16	Tle3	chr9	+	61394607	61394712	61394607	61394682	61401852	61402057	2305	18,23	83,86	50,38	57,51	129	99	3.71696e-07	2.38309e-05	0.143,0.17	0.402,0.364	-0.227
5573	ENSMUSG00000079641.3	Rpl39	chrX	-	37084636	37085016	37084754	37085016	37083984	37084088	5573	0,0	1,2	5,5	9,8	198	99	0.000290642	0.00710697	0.0,0.0	0.217,0.238	-0.227
22563	ENSMUSG00000063047.9	Zfp780b	chr7	-	27976735	27976833	27976751	27976833	27974752	27974805	22563	0,0	20,12	13,5	22,33	115	99	6.19419e-06	0.000287338	0.0,0.0	0.337,0.115	-0.226
1724	ENSMUSG00000048285.9	Frmd6	chr12	+	70877159	70877263	70877159	70877239	70878416	70878493	1724	16,13	87,88	34,40	56,58	123	99	9.11645e-08	6.83062e-06	0.129,0.106	0.328,0.357	-0.225
10908	ENSMUSG00000057113.13	Npm1	chr11	-	33160831	33161225	33161105	33161225	33160333	33160440	10908	89,46	10,9	156141	0,1	198	99	7.82201e-10	9.07123e-08	0.817,0.719	1.0,0.986	-0.225
34191	ENSMUSG00000050379.15	2022-09-06	chrX	-	36942054	36942216	36942081	36942216	36934383	36934480	34191	111,84	42,18	120162	5,5	126	99	5.52107e-11	8.13816e-09	0.675,0.786	0.95,0.962	-0.225
10695	ENSMUSG00000018906.14	P4ha2	chr11	+	54101067	54101256	54101067	54101234	54101519	54101647	10695	9,13	6,0	3,7	0,0	121	99	0.00151709	0.0270216	0.551,1.0	1.0,1.0	-0.224
2221	ENSMUSG00000053332.13	Gas5	chr1	+	161036819	161037315	161036819	161036852	161038224	161038272	2221	320227	54,49	22721602	45,60	198	99	0	0	0.748,0.698	0.962,0.93	-0.223
14699	ENSMUSG00000020949.9	Fkbp3	chr12	-	65068997	65069067	65069001	65069067	65065736	65065804	14699	21,20	8,4	83,57	1,0	103	99	1.09605e-07	8.00318e-06	0.716,0.828	0.988,1.0	-0.222
29308	ENSMUSG00000063316.13	Rpl27	chr11	+	101442297	101442612	101442297	101442402	101442722	101442805	29308	0,0	12,20	2,3	8,3	198	99	0.00258461	0.04099	0.0,0.0	0.111,0.333	-0.222
2261	ENSMUSG00000001632.16	Brpf1	chr6	+	113317547	113317694	113317547	113317676	113318411	113318721	2261	5,21	56,52	39,33	51,47	117	99	0.000404019	0.00943329	0.07,0.255	0.393,0.373	-0.221
8294	ENSMUSG00000021411.16	Pxdc1	chr13	-	34637153	34637307	34637247	34637307	34630350	34630462	8294	0,0	2,1	6,4	7,13	193	99	0.000354036	0.00844758	0.0,0.0	0.305,0.136	-0.221
13018	ENSMUSG00000001847.14	Rac1	chr5	-	143517157	143517227	143517159	143517227	143508095	143508158	13018	29,45	21,7	20,30	0,4	101	99	0.00324985	0.049026	0.575,0.863	1.0,0.88	-0.221
15484	ENSMUSG00000040824.3	Snrpd2	chr7	+	19149721	19150007	19149721	19149935	19151217	19151397	15484	0,1	1,2	8,14	13,12	171	99	0.00277834	0.0434823	0.0,0.224	0.263,0.403	-0.221
23218	ENSMUSG00000026779.6	Mastl	chr2	-	23155808	23155897	23155824	23155897	23150987	23151125	23218	0,0	2,2	2,5	17,8	115	99	0.000512865	0.0113935	0.0,0.0	0.092,0.35	-0.221
32419	ENSMUSG00000063362.13	Alg11	chr8	+	22061885	22062120	22061885	22062116	22065125	22065931	32419	0,0	3,1	5,3	11,18	103	99	0.000293673	0.00716999	0.0,0.0	0.304,0.138	-0.221
3265	ENSMUSG00000047767.17	Atg16l2	chr7	-	101291714	101291999	101291878	101291999	101291486	101291592	3265	2,5	53,41	37,43	57,58	198	99	3.9169e-11	5.9978e-09	0.019,0.057	0.245,0.27	-0.22
16016	ENSMUSG00000028494.12	Plin2	chr4	-	86669303	86669768	86669700	86669768	86668649	86668705	16016	45,30	23,17	54,54	11,12	198	99	0.00265341	0.0419124	0.495,0.469	0.711,0.692	-0.22
16019	ENSMUSG00000028494.12	Plin2	chr4	-	86669415	86669768	86669700	86669768	86668649	86668705	16019	47,30	23,17	55,56	11,12	198	99	0.00253765	0.0403466	0.505,0.469	0.714,0.7	-0.22
1336	ENSMUSG00000036550.16	Cnot1	chr8	-	95733070	95733323	95733091	95733323	95730412	95730661	1336	79,56	288254	100131	148150	120	99	2.46625e-12	4.74362e-10	0.185,0.154	0.358,0.419	-0.219
15381	ENSMUSG00000025008.15	Tctn3	chr19	-	40605554	40605797	40605702	40605797	40605305	40605459	15381	0,0	16,24	8,6	9,20	198	99	1.39286e-06	7.72169e-05	0.0,0.0	0.308,0.13	-0.219
27045	ENSMUSG00000041846.15	Ppp4r3a	chr12	-	101042427	101042645	101042478	101042645	101041876	101042051	27045	49,31	12,5	57,99	0,2	150	99	1.13885e-07	8.27737e-06	0.729,0.804	1.0,0.97	-0.219
7406	ENSMUSG00000022185.19	Acin1	chr14	-	54653213	54653566	54653534	54653566	54651716	54651858	7406	63,48	34,23	346304	64,66	198	99	1.64873e-05	0.000664209	0.481,0.511	0.73,0.697	-0.218
13032	ENSMUSG00000041936.18	Agrn	chr4	-	156173295	156173587	156173542	156173587	156173002	156173130	13032	33,12	230201	128,66	133127	198	99	0	0	0.067,0.029	0.325,0.206	-0.218
16290	ENSMUSG00000030309.16	Caprin2	chr6	-	148848105	148848291	148848259	148848291	148846152	148846253	16290	22,13	0,5	53,43	0,0	198	99	0.00250333	0.0399418	1.0,0.565	1.0,1.0	-0.218
2564	ENSMUSG00000035762.11	Tmem161b	chr13	+	84283984	84284185	84283984	84284125	84286684	84286798	2564	11,7	51,51	77,49	99,70	159	99	6.83231e-08	5.29529e-06	0.118,0.079	0.326,0.304	-0.216
8177	ENSMUSG00000062248.5	Cks2	chr13	+	51645231	51645507	51645231	51645465	51649584	51649712	8177	31,19	4,5	51,30	0,0	141	99	9.29835e-06	0.000407938	0.845,0.727	1.0,1.0	-0.214
29400	ENSMUSG00000001630.13	Stk38l	chr6	+	146725035	146725508	146725035	146725047	146766194	146766317	29400	0,0	2,1	1,4	3,5	198	99	0.00163825	0.0286497	0.0,0.0	0.143,0.286	-0.214
34791	ENSMUSG00000034709.8	Ppp1r21	chr17	+	88550661	88550773	88550661	88550699	88554849	88554902	34791	22,19	3,4	51,83	1,0	173	99	5.58996e-05	0.00185423	0.808,0.731	0.967,1.0	-0.214
1799	ENSMUSG00000018501.17	Ncor1	chr11	-	62378496	62378654	62378514	62378654	62376634	62376761	1799	24,45	77,63	48,49	36,45	117	99	0.00150996	0.0269249	0.209,0.377	0.53,0.48	-0.212
32651	ENSMUSG00000031585.13	Gtf2e2	chr8	+	33732338	33732674	33732338	33732515	33735733	33735906	32651	170182	54,36	75,77	1,11	198	99	0.000793066	0.0162762	0.612,0.717	0.974,0.778	-0.212
6385	ENSMUSG00000023010.15	Tmbim6	chr15	+	99393021	99393506	99393021	99393027	99401579	99401663	6385	15,15	2,2	25,18	0,0	198	99	0.00317467	0.0481219	0.789,0.789	1.0,1.0	-0.211
8496	ENSMUSG00000042063.11	Zfp386	chr12	+	116054721	116054953	116054721	116054838	116058904	116063360	8496	0,0	6,2	4,7	15,8	198	99	0.000193319	0.00513738	0.0,0.0	0.118,0.304	-0.211
16341	ENSMUSG00000028081.6	Rps3a1	chr3	-	86142215	86142702	86142244	86142702	86141697	86141801	16341	1,0	2,4	12,10	26,10	128	99	0.00164395	0.0286977	0.279,0.0	0.263,0.436	-0.21
33294	ENSMUSG00000036712.15	Cyld	chr8	+	88697027	88697193	88697027	88697099	88705225	88705879	33294	4,7	51,40	21,25	26,39	193	99	2.28601e-07	1.531e-05	0.039,0.082	0.293,0.247	-0.21
515	ENSMUSG00000023026.16	Dip2b	chr15	+	100155033	100155156	100155033	100155153	100157169	100157367	515	4,4	103,59	5,13	22,25	102	99	1.42289e-05	0.000584141	0.036,0.062	0.181,0.335	-0.209
31376	ENSMUSG00000072244.11	Trim6	chr7	+	104218792	104219193	104218792	104218883	104225506	104225980	31376	0,0	4,1	5,4	9,8	198	99	0.000251084	0.00630088	0.0,0.0	0.217,0.2	-0.209
33334	ENSMUSG00000001062.18	Vps9d1	chr8	-	123248586	123248676	123248613	123248676	123248153	123248206	33334	1,3	39,24	9,9	30,14	126	99	0.000172532	0.00470167	0.02,0.089	0.191,0.336	-0.209
2714	ENSMUSG00000061904.12	Slc25a3	chr10	-	91122107	91122331	91122206	91122331	91119526	91119706	2714	118,98	15,26	409267	16,9	198	99	1.73216e-07	1.19823e-05	0.797,0.653	0.927,0.937	-0.207
26937	ENSMUSG00000034211.14	Mrps17	chr5	+	129715683	129715941	129715683	129715794	129716726	129716866	26937	21,25	20,16	127108	41,38	198	99	0.00298374	0.046024	0.344,0.439	0.608,0.587	-0.206
7325	ENSMUSG00000047996.16	Prrg1	chrX	-	78583577	78583782	78583703	78583782	78561575	78561644	7325	0,0	1,1	8,3	11,9	198	99	0.000383575	0.00904296	0.0,0.0	0.267,0.143	-0.205
16403	ENSMUSG00000022673.5	Mcm4	chr16	-	15635048	15635323	15635229	15635323	15634438	15634577	16403	499373	57,60	445579	2,3	198	99	0	0	0.814,0.757	0.991,0.99	-0.205
18873	ENSMUSG00000005718.8	Tfap4	chr16	-	4558546	4558783	4558586	4558783	4551934	4552100	18873	0,0	3,1	1,5	9,7	139	99	0.000449511	0.010306	0.0,0.0	0.073,0.337	-0.205
2363	ENSMUSG00000022770.17	Dlg1	chr16	+	31796865	31797010	31796865	31796965	31805613	31805734	2363	245245	146131	283345	73,67	144	99	1.76111e-09	1.90902e-07	0.536,0.563	0.727,0.78	-0.204
8856	ENSMUSG00000021134.17	Srsf5	chr12	+	80947795	80948165	80947795	80947865	80949094	80949168	8856	61,77	169140	1143857	697890	198	99	3.70573e-08	3.06004e-06	0.153,0.216	0.451,0.325	-0.204
22963	ENSMUSG00000105518.1	Gm42674	chr3	+	90602190	90602312	90602190	90602270	90604996	90605152	22963	0,1	4,4	26,12	31,38	141	99	0.000869964	0.0174902	0.0,0.149	0.371,0.181	-0.202
2803	ENSMUSG00000040690.15	Col16a1	chr4	+	130081434	130081521	130081434	130081479	130083121	130083175	2803	5,3	176187	9,15	27,33	141	99	1.1664e-12	2.38915e-10	0.02,0.011	0.19,0.242	-0.201
11355	ENSMUSG00000025373.14	Rnf41	chr10	+	128435312	128435580	128435312	128435568	128436467	128436603	11355	0,0	7,5	3,2	8,10	111	99	0.00210132	0.0346493	0.0,0.0	0.251,0.151	-0.201
28930	ENSMUSG00000106447.1	Gm42957	chr3	+	96635473	96635743	96635473	96635500	96636673	96636789	28930	103,96	15,17	229265	6,5	198	99	5.85266e-09	5.57754e-07	0.774,0.738	0.95,0.964	-0.201
6950	ENSMUSG00000023067.14	Cdkn1a	chr17	+	29093768	29094267	29093768	29093861	29098396	29098837	6950	75,63	643528	265133	238369	198	99	1.42771e-10	1.97526e-08	0.055,0.056	0.358,0.153	-0.2
7996	ENSMUSG00000113047.1	Gm47469	chr13	-	74563927	74564256	74564137	74564256	74563738	74563824	7996	0,0	6,2	8,6	14,14	198	99	0.000107065	0.00321951	0.0,0.0	0.222,0.176	-0.199
2511	ENSMUSG00000039983.13	Ccdc32	chr2	-	119029307	119029393	119029316	119029393	119027137	119027387	2511	4,2	38,22	52,48	110127	108	99	4.6691e-05	0.00158709	0.088,0.077	0.302,0.257	-0.197
434	ENSMUSG00000022425.16	Enpp2	chr15	-	54862497	54862682	54862509	54862682	54860042	54860094	434	40,29	6,12	7,15	0,1	111	99	0.000430828	0.00996337	0.856,0.683	1.0,0.93	-0.196
31493	ENSMUSG00000013997.10	Nit1	chr1	-	171345211	171345646	171345535	171345646	171344913	171345000	31493	44,15	75,84	62,58	43,74	198	99	0.000243189	0.0061517	0.227,0.082	0.419,0.282	-0.196
2741	ENSMUSG00000036898.16	Zfp157	chr5	+	138454979	138455093	138454979	138455089	138455878	138456327	2741	0,0	10,12	6,6	22,26	103	99	5.27532e-05	0.00176744	0.0,0.0	0.208,0.182	-0.195
20468	ENSMUSG00000041935.10	AW549877	chr15	-	3991988	3992464	3992357	3992464	3991717	3991864	20468	9,7	94,92	77,66	102134	198	99	4.4742e-14	1.06116e-11	0.046,0.037	0.274,0.198	-0.195
2535	ENSMUSG00000041215.16	Yeats2	chr16	+	20171190	20174539	20171190	20171302	20179500	20179675	2535	91,76	17,5	109113	0,0	198	99	4.68797e-09	4.60677e-07	0.728,0.884	1.0,1.0	-0.194
5523	ENSMUSG00000002477.5	Snrpd1	chr18	+	10626825	10626992	10626825	10626931	10627793	10628230	5523	0,0	2,1	4,2	9,6	160	99	0.00169177	0.0293376	0.0,0.0	0.216,0.171	-0.194
25204	ENSMUSG00000021361.7	Tmem14c	chr13	+	41016961	41017272	41016961	41017268	41017705	41017782	25204	0,0	7,4	3,4	12,16	103	99	0.000551213	0.0120746	0.0,0.0	0.194,0.194	-0.194
1305	ENSMUSG00000028289.12	Epha7	chr4	+	28938595	28938779	28938595	28938764	28942585	28942694	1305	32,35	30,27	100,74	30,34	114	99	0.00134509	0.0243848	0.481,0.53	0.743,0.654	-0.193
2190	ENSMUSG00000040174.14	Alkbh3	chr2	-	94010262	94010752	94010682	94010752	94008423	94008592	2190	45,28	157139	165133	190155	198	99	8.50653e-13	1.80087e-10	0.125,0.092	0.303,0.3	-0.193
8047	ENSMUSG00000005899.14	Smpd4	chr16	+	17635481	17635602	17635481	17635568	17638495	17638641	8047	0,0	5,14	4,5	23,10	133	99	0.000189827	0.00506163	0.0,0.0	0.115,0.271	-0.193
3176	ENSMUSG00000003190.12	Bcl2l12	chr7	-	44993810	44994271	44994179	44994271	44992743	44993031	3176	20,15	54,26	182112	109125	198	99	0.000154769	0.00430895	0.156,0.224	0.455,0.309	-0.192
28955	ENSMUSG00000022248.14	Rad1	chr15	+	10486017	10486264	10486017	10486026	10486452	10486716	28955	47,43	5,6	204215	0,1	198	99	7.7121e-08	5.89033e-06	0.825,0.782	1.0,0.991	-0.192
18205	ENSMUSG00000028042.15	Zbtb7b	chr3	-	89393408	89393635	89393476	89393635	89393034	89393135	18205	0,2	33,11	4,5	9,8	167	99	0.000142621	0.00404937	0.0,0.097	0.209,0.27	-0.191
19116	ENSMUSG00000002307.16	Daxx	chr17	+	33909444	33909598	33909444	33909493	33910430	33910671	19116	192160	22,22	186188	0,2	198	99	9.86433e-13	2.06067e-10	0.814,0.784	1.0,0.979	-0.191
3125	ENSMUSG00000040225.15	Prrc2c	chr1	-	162721429	162721539	162721444	162721539	162720480	162720606	3125	175114	76,71	140118	26,25	114	99	5.65363e-06	0.000265384	0.667,0.582	0.824,0.804	-0.19
2752	ENSMUSG00000025199.16	Chuk	chr19	-	44077245	44077379	44077262	44077379	44075430	44075530	2752	70,55	39,43	177189	54,49	116	99	8.13502e-05	0.00255334	0.605,0.522	0.737,0.767	-0.189
2492	ENSMUSG00000028601.18	Echdc2	chr4	+	108169860	108170226	108169860	108169948	108172088	108172175	2492	60,62	594532	393271	520526	198	99	0	0	0.048,0.055	0.274,0.205	-0.188
491	ENSMUSG00000047153.4	Khnyn	chr14	+	55893991	55894159	55893991	55894099	55894286	55894388	491	48,31	124106	67,43	61,58	159	99	7.92681e-06	0.000353668	0.194,0.154	0.406,0.316	-0.187
2398	ENSMUSG00000060373.15	Hnrnpc	chr14	-	52081788	52081903	52081827	52081903	52081259	52081307	2398	852769	24162034	22122303	23912584	138	99	0	0	0.202,0.213	0.399,0.39	-0.187
14548	ENSMUSG00000035517.17	Tdrd7	chr4	+	45965333	45965500	45965333	45965476	45987461	45987674	14548	0,0	2,4	1,6	16,10	123	99	0.000875869	0.0175642	0.0,0.0	0.048,0.326	-0.187
386	ENSMUSG00000062906.12	Hdac10	chr15	-	89126629	89126706	89126640	89126706	89126377	89126437	386	2,1	16,12	15,20	42,42	110	99	0.00248313	0.0396797	0.101,0.07	0.243,0.3	-0.186
2461	ENSMUSG00000050335.17	Lgals3	chr14	+	47373915	47373979	47373915	47373952	47379478	47379544	2461	61,62	27,24	29,39	5,5	126	99	0.00224476	0.0364993	0.64,0.67	0.82,0.86	-0.185
16362	ENSMUSG00000028081.6	Rps3a1	chr3	-	86142422	86142702	86142535	86142702	86141697	86141801	16362	0,0	8,8	7,6	13,16	198	99	3.83864e-05	0.00136666	0.0,0.0	0.212,0.158	-0.185
16352	ENSMUSG00000028081.6	Rps3a1	chr3	-	86142244	86142702	86142509	86142702	86141697	86141801	16352	2,4	37,35	26,10	28,33	198	99	1.37279e-05	0.000568286	0.026,0.054	0.317,0.132	-0.184
34789	ENSMUSG00000097177.8	9330159M07Rik	chr9	-	88858595	88858853	88858808	88858853	88858389	88858444	34789	0,1	4,7	4,9	12,11	198	99	0.000642792	0.013654	0.0,0.067	0.143,0.29	-0.183
1594	ENSMUSG00000038733.14	Wdr26	chr1	-	181209002	181209107	181209050	181209107	181203023	181203224	1594	106,90	22,22	83,47	3,3	147	99	1.60939e-05	0.00065002	0.764,0.734	0.949,0.913	-0.182
3491	ENSMUSG00000005150.16	Wdr83	chr8	-	85080060	85080225	85080119	85080225	85079788	85079837	3491	23,22	96,84	55,59	69,85	158	99	9.47028e-07	5.44136e-05	0.131,0.141	0.333,0.303	-0.182
17364	ENSMUSG00000038975.14	Rabggtb	chr3	-	153910063	153910346	153910260	153910346	153909545	153909598	17364	168170	883785	469477	578680	198	99	0	0	0.087,0.098	0.289,0.26	-0.182
26911	ENSMUSG00000034211.14	Mrps17	chr5	+	129715496	129715923	129715496	129715794	129716726	129716866	26911	7,8	20,16	47,41	41,38	198	99	0.00231404	0.0374339	0.149,0.2	0.364,0.35	-0.182
17926	ENSMUSG00000039801.7	Cplane1	chr15	+	8169105	8169489	8169105	8169462	8170305	8170394	17926	38,42	10,6	43,29	0,1	126	99	7.97634e-06	0.000354874	0.749,0.846	1.0,0.958	-0.181
5319	ENSMUSG00000007036.15	Abhd16a	chr17	+	35091570	35092007	35091570	35091953	35094250	35094336	5319	53,30	8,4	12,12	0,0	153	99	0.000133725	0.00384025	0.811,0.829	1.0,1.0	-0.18
6889	ENSMUSG00000072501.5	Phf20l1	chr15	+	66622760	66622911	66622760	66622817	66623760	66623883	6889	1,3	24,21	6,13	14,18	193	99	0.000129266	0.00375121	0.021,0.068	0.18,0.27	-0.18
6893	ENSMUSG00000072501.5	Phf20l1	chr15	+	66630866	66631070	66630866	66631045	66632705	66632901	6893	0,0	13,14	2,5	7,19	124	99	0.000376452	0.00889499	0.0,0.0	0.186,0.174	-0.18
6452	ENSMUSG00000003352.14	Cacnb3	chr15	+	98635104	98635392	98635104	98635338	98639487	98639610	6452	24,19	3,3	7,6	0,0	153	99	0.00154173	0.0272908	0.838,0.804	1.0,1.0	-0.179
2447	ENSMUSG00000026792.16	Lrsam1	chr2	-	32940235	32940340	32940240	32940340	32938796	32938884	2447	0,0	12,21	7,5	32,21	104	99	3.02947e-05	0.00111605	0.0,0.0	0.172,0.185	-0.178
18206	ENSMUSG00000028042.15	Zbtb7b	chr3	-	89393408	89393678	89393613	89393678	89393034	89393135	18206	52,54	11,5	42,37	0,2	198	99	0.000424886	0.00984761	0.703,0.844	1.0,0.902	-0.178
1330	ENSMUSG00000028689.14	Ccdc163	chr4	+	116710100	116710284	116710100	116710280	116714015	116714149	1330	12,19	5,1	13,13	0,0	103	99	0.000608208	0.0130512	0.698,0.948	1.0,1.0	-0.177
3490	ENSMUSG00000005150.16	Wdr83	chr8	-	85080053	85080225	85080119	85080225	85079788	85079837	3490	25,27	96,84	61,62	69,85	165	99	2.23432e-06	0.000117495	0.135,0.162	0.347,0.304	-0.177
9914	ENSMUSG00000091228.1	Gm20390	chr11	-	93967902	93968293	93968173	93968293	93965807	93965937	9914	0,0	3,3	4,7	11,14	198	99	0.000301188	0.0073251	0.0,0.0	0.154,0.2	-0.177
14071	ENSMUSG00000007837.11	Prrg2	chr7	-	45060511	45060892	45060740	45060892	45060204	45060415	14071	0,1	7,9	6,4	9,11	198	99	0.000466955	0.0105969	0.0,0.053	0.25,0.154	-0.176
27044	ENSMUSG00000041846.15	Ppp4r3a	chr12	-	101042258	101042645	101042478	101042645	101041876	101042051	27044	77,57	12,5	72109	0,2	198	99	2.85505e-06	0.000145964	0.762,0.851	1.0,0.965	-0.176
4841	ENSMUSG00000097610.2	A930012L18Rik	chr18	+	44670007	44670215	44670007	44670128	44672222	44672476	4841	0,0	3,2	6,2	9,11	186	99	0.000613967	0.013148	0.0,0.0	0.262,0.088	-0.175
5624	ENSMUSG00000034681.17	Rnps1	chr17	+	24414662	24415081	24414662	24414734	24418037	24418218	5624	51,42	613567	107,74	157179	198	99	0	0	0.04,0.036	0.254,0.171	-0.175
16794	ENSMUSG00000005699.16	Pard6a	chr8	+	105701147	105701366	105701147	105701286	105702173	105702396	16794	26,19	68,59	62,57	66,63	179	99	2.72081e-05	0.00103155	0.175,0.151	0.342,0.334	-0.175
22241	ENSMUSG00000033159.14	Cnppd1	chr1	-	75141699	75142071	75142057	75142071	75141415	75141503	22241	62,67	121107	71,82	53,65	198	99	1.42354e-05	0.000584141	0.204,0.238	0.401,0.387	-0.173
26284	ENSMUSG00000029165.17	Agbl5	chr5	+	30893900	30894242	30893900	30894070	30894374	30894510	26284	5,6	25,34	27,20	27,44	198	99	0.000616453	0.0131902	0.091,0.081	0.333,0.185	-0.173
15522	ENSMUSG00000051674.15	Dcun1d4	chr5	+	73520914	73521083	73520914	73521044	73522652	73522744	15522	0,0	6,7	0,8	8,11	138	99	0.000574584	0.0124792	0.0,0.0	0.0,0.343	-0.172
19055	ENSMUSG00000038523.10	1700003F12Rik	chr2	+	154549296	154549395	154549296	154549366	154549539	154550003	19055	27,23	3,5	49,64	0,0	128	99	2.80635e-05	0.0010576	0.874,0.781	1.0,1.0	-0.172
22602	ENSMUSG00000046909.9	Tefm	chr11	-	80139795	80139909	80139799	80139909	80137945	80138067	22602	0,0	5,2	3,4	15,17	103	99	0.000974005	0.0191546	0.0,0.0	0.161,0.184	-0.172
35251	ENSMUSG00000031090.14	Nadsyn1	chr7	-	143803964	143804149	143804013	143804149	143799790	143799922	35251	0,0	1,4	1,5	13,8	148	99	0.000967426	0.0190371	0.0,0.0	0.049,0.295	-0.172
808	ENSMUSG00000020697.16	Lig3	chr11	+	82781192	82781276	82781192	82781272	82783345	82783899	808	95,80	101,73	138155	62,81	103	99	5.99033e-05	0.00196423	0.475,0.513	0.681,0.648	-0.171
4514	ENSMUSG00000092274.3	Neat1	chr19	-	5844571	5844758	5844577	5844758	5843680	5844434	4514	10,17	63,67	28,15	52,29	105	99	0.00133528	0.0242488	0.13,0.193	0.337,0.328	-0.171
27775	ENSMUSG00000074165.10	Zfp788	chr7	+	41634647	41634745	41634647	41634710	41643332	41643432	27775	0,1	6,3	11,6	22,12	134	99	0.00103396	0.0199971	0.0,0.198	0.27,0.27	-0.171
2490	ENSMUSG00000038437.11	Mllt6	chr11	+	97672456	97672682	97672456	97672592	97673459	97674071	2490	13,11	80,72	36,42	62,63	189	99	1.57614e-07	1.10484e-05	0.078,0.074	0.233,0.259	-0.17
15450	ENSMUSG00000028007.13	Snx7	chr3	-	117832846	117833039	117832867	117833039	117829576	117829663	15450	0,0	3,4	3,3	8,21	120	99	0.00147653	0.0264635	0.0,0.0	0.236,0.105	-0.17
17621	ENSMUSG00000086328.1	2700033N17Rik	chr2	-	116066954	116067444	116067048	116067444	116066217	116066618	17621	0,0	3,8	0,6	2,6	193	99	0.000967045	0.0190371	0.0,0.0	0.0,0.339	-0.17
29048	ENSMUSG00000057666.18	Gapdh	chr6	-	125165096	125165311	125165154	125165311	125163134	125163436	29048	438407	80,67	366243	5,12	157	99	1.17684e-14	2.96977e-12	0.775,0.793	0.979,0.927	-0.169
3186	ENSMUSG00000063511.11	Snrnp70	chr7	-	45381824	45383184	45383124	45383184	45380716	45380818	3186	53,38	5,9	499332	22,11	198	99	0.00212333	0.034921	0.841,0.679	0.919,0.938	-0.168
22946	ENSMUSG00000060224.4	Pyroxd2	chr19	-	42733716	42733877	42733720	42733877	42731318	42731473	22946	1,1	19,17	8,5	19,27	103	99	0.00232125	0.0375303	0.048,0.054	0.288,0.151	-0.168
22962	ENSMUSG00000105518.1	Gm42674	chr3	+	90601903	90602371	90601903	90602270	90604996	90605152	22962	0,1	4,4	28,12	31,38	198	99	0.00080663	0.0164902	0.0,0.111	0.311,0.136	-0.168
1483	ENSMUSG00000013736.16	Trnt1	chr6	+	106769165	106769256	106769165	106769191	106769829	106770003	1483	90,93	58,40	654544	155151	164	99	0.000179965	0.00484369	0.484,0.584	0.718,0.685	-0.167
2624	ENSMUSG00000038552.14	Fndc4	chr5	-	31293394	31293486	31293413	31293486	31292885	31293164	2624	15,12	98,90	120118	250286	118	99	2.3455e-07	1.56751e-05	0.114,0.101	0.287,0.257	-0.165
3434	ENSMUSG00000050914.16	Ankrd37	chr8	-	45999616	45999867	45999650	45999867	45999250	45999403	3434	18021644	377334	28622628	125,97	133	99	0	0	0.781,0.786	0.945,0.953	-0.165
21260	ENSMUSG00000020170.4	Frs2	chr10	-	117099830	117099967	117099942	117099967	117085031	117085123	21260	9,1	35,25	16,7	20,16	198	99	0.00171366	0.0296314	0.114,0.02	0.286,0.179	-0.165
30271	ENSMUSG00000058239.13	Usf2	chr7	-	30955880	30956238	30956148	30956238	30955289	30955440	30271	48,38	61,46	56,33	34,20	198	99	0.00324619	0.0489942	0.282,0.292	0.452,0.452	-0.165
24671	ENSMUSG00000050335.17	Lgals3	chr14	+	47373915	47373979	47373915	47373952	47379258	47379302	24671	24,27	3,5	16,20	0,0	126	99	0.00023305	0.00596214	0.863,0.809	1.0,1.0	-0.164
1725	ENSMUSG00000002221.11	Paxip1	chr5	-	27783680	27783773	27783729	27783773	27781421	27781485	1725	2,4	29,38	50,45	105126	148	99	1.25353e-05	0.000524422	0.044,0.066	0.242,0.193	-0.163
16835	ENSMUSG00000039262.16	Prrc2b	chr2	+	32212886	32214947	32212886	32213079	32216045	32216233	16835	48,67	9,4	35,35	0,1	198	99	0.000234074	0.0059738	0.727,0.893	1.0,0.946	-0.163
26439	ENSMUSG00000079487.11	Med12	chrX	+	101283667	101284035	101283667	101283799	101284145	101284373	26439	4,3	86,53	12,9	18,31	198	99	1.51639e-06	8.30971e-05	0.023,0.028	0.25,0.127	-0.163
428	ENSMUSG00000022377.16	Asap1	chr15	-	64158881	64159004	64158917	64159004	64152829	64152930	428	49,42	58,61	95,67	54,53	135	99	0.0017641	0.0303276	0.383,0.336	0.563,0.481	-0.162
1606	ENSMUSG00000026927.17	Entr1	chr2	-	26385497	26385609	26385540	26385609	26384681	26384821	1606	57,33	4,7	125113	0,0	142	99	1.06596e-06	6.09144e-05	0.909,0.767	1.0,1.0	-0.162
18203	ENSMUSG00000028042.15	Zbtb7b	chr3	-	89393293	89393678	89393613	89393678	89393034	89393135	18203	66,56	11,5	46,46	0,2	198	99	0.000345768	0.00827534	0.75,0.848	1.0,0.92	-0.161
2268	ENSMUSG00000039449.14	Prpf18	chr2	-	4637147	4638995	4638848	4638995	4635827	4635968	2268	94,95	9,10	250308	2,0	198	99	4.37188e-10	5.36602e-08	0.839,0.826	0.984,1.0	-0.159
9451	ENSMUSG00000020812.17	1810032O08Rik	chr11	+	116674299	116674767	116674299	116674375	116675507	116675798	9451	56,47	267238	303212	417342	198	99	5.10703e-15	1.36522e-12	0.095,0.09	0.266,0.237	-0.159
23194	ENSMUSG00000026784.14	Pdss1	chr2	+	22915392	22915528	22915392	22915524	22929539	22929620	23194	1,0	11,1	29,31	106128	103	99	0.00156372	0.0275411	0.08,0.0	0.208,0.189	-0.159
24337	ENSMUSG00000053453.9	Thoc7	chr14	-	13957061	13957535	13957459	13957535	13954538	13954656	24337	16,17	71,63	112,96	166120	198	99	7.73352e-07	4.58545e-05	0.101,0.119	0.252,0.286	-0.159
25213	ENSMUSG00000027395.15	Polr1b	chr2	+	129113500	129113782	129113500	129113727	129115638	129115772	25213	72,49	7,15	188244	11,9	154	99	0.000662545	0.0140076	0.869,0.677	0.917,0.946	-0.158
28569	ENSMUSG00000096916.7	Zfp850	chr7	-	28012327	28012450	28012335	28012450	28008383	28008436	28569	0,0	12,21	8,13	48,54	107	99	1.75438e-05	0.000699625	0.0,0.0	0.134,0.182	-0.158
20259	ENSMUSG00000078580.3	E430018J23Rik	chr7	-	127393207	127393619	127393252	127393619	127393000	127393114	20259	0,0	1,3	6,5	31,14	144	99	0.00105027	0.0201274	0.0,0.0	0.117,0.197	-0.157
21328	ENSMUSG00000044328.13	Trp53i13	chr11	-	77512652	77512694	77512667	77512694	77509597	77509726	21328	70,74	25,17	63,73	7,5	114	99	0.000279175	0.00687454	0.709,0.791	0.887,0.927	-0.157
34847	ENSMUSG00000028580.15	Pum1	chr4	+	130668924	130669298	130668924	130669203	130701041	130701110	34847	211161	55,50	215216	35,21	194	99	0.000179083	0.00482408	0.662,0.622	0.758,0.84	-0.157
11607	ENSMUSG00000020128.15	Vps54	chr11	+	21263198	21263354	21263198	21263287	21264665	21264871	11607	55,40	12,8	99,90	6,7	166	99	0.00333202	0.0499075	0.732,0.749	0.908,0.885	-0.156
11990	ENSMUSG00000006498.16	Ptbp1	chr10	+	79859795	79860194	79859795	79859955	79860823	79860969	11990	1131840	1156892	796814	398481	198	99	9.26785e-09	8.5481e-07	0.328,0.32	0.5,0.458	-0.155
21333	ENSMUSG00000044328.13	Trp53i13	chr11	-	77512698	77512965	77512896	77512965	77509597	77509726	21333	42,35	3,4	12,20	0,0	198	99	0.000909722	0.0181392	0.875,0.814	1.0,1.0	-0.155
23422	ENSMUSG00000023106.15	Denr	chr5	+	123908069	123908542	123908069	123908214	123917199	123917284	23422	14,19	74,75	31,24	38,43	198	99	4.44239e-05	0.00152316	0.086,0.112	0.29,0.218	-0.155
29641	ENSMUSG00000002028.13	Kmt2a	chr9	-	44843197	44843422	44843357	44843422	44842532	44842916	29641	2,0	35,42	10,2	16,9	198	99	5.10694e-06	0.000243343	0.028,0.0	0.238,0.1	-0.155
2731	ENSMUSG00000019518.11	Ap4m1	chr5	+	138172348	138172479	138172348	138172437	138172786	138172893	2731	10,14	187174	82,49	170204	141	99	3.44246e-11	5.34921e-09	0.036,0.053	0.253,0.144	-0.154
24257	ENSMUSG00000057897.14	Camk2b	chr11	-	5989858	5990246	5990162	5990246	5989573	5989668	24257	0,0	5,5	6,11	17,29	198	99	0.000166576	0.00457307	0.0,0.0	0.15,0.159	-0.154
2978	ENSMUSG00000027411.17	Vps16	chr2	+	130440899	130441028	130440899	130441008	130441164	130441299	2978	5,1	231200	80,70	297345	119	99	0	0	0.018,0.004	0.183,0.144	-0.152
14613	ENSMUSG00000028468.15	Rgp1	chr4	+	43579374	43579557	43579374	43579424	43579886	43580023	14613	90,82	6,11	74,60	1,0	198	99	1.15434e-05	0.000490073	0.882,0.788	0.974,1.0	-0.152
22850	ENSMUSG00000053332.13	Gas5	chr1	+	161036604	161037103	161036604	161036852	161037287	161037547	22850	307225	56384692	22751602	45154441	198	99	0	0	0.027,0.023	0.201,0.153	-0.152
2394	ENSMUSG00000035168.16	Tanc1	chr2	+	59790775	59790898	59790775	59790877	59791598	59791880	2394	26,23	90,92	61,55	105,88	120	99	0.000188913	0.00504151	0.192,0.171	0.324,0.34	-0.151
22344	ENSMUSG00000092203.7	1110038B12Rik	chr17	-	34952114	34952468	34952351	34952468	34951884	34951925	22344	295264	64,52	774589	48,62	198	99	7.98327e-08	6.06806e-06	0.697,0.717	0.89,0.826	-0.151
31071	ENSMUSG00000036580.15	Spg20	chr3	+	55112107	55112530	55112107	55112217	55116983	55117795	31071	33,33	269278	44,39	91,69	198	99	6.79679e-12	1.25379e-09	0.058,0.056	0.195,0.22	-0.151
22565	ENSMUSG00000063047.9	Zfp780b	chr7	-	27976741	27976833	27976751	27976833	27974752	27974805	22565	0,0	20,12	7,3	22,33	109	99	0.000183924	0.00492546	0.0,0.0	0.224,0.076	-0.15
22845	ENSMUSG00000053332.13	Gas5	chr1	+	161036525	161036956	161036525	161036852	161037123	161037164	22845	245170	31762813	959747	19171891	198	99	0	0	0.037,0.029	0.2,0.165	-0.149
237	ENSMUSG00000025735.13	Rhbdl1	chr17	-	25836398	25836572	25836410	25836572	25835968	25836193	237	0,0	1,1	1,10	26,25	111	99	0.00131565	0.0239475	0.0,0.0	0.033,0.263	-0.148
1517	ENSMUSG00000042520.16	Ubap2l	chr3	-	90038814	90039016	90038847	90039016	90038369	90038465	1517	115,93	442311	108101	152183	132	99	1.53266e-07	1.08157e-05	0.163,0.183	0.348,0.293	-0.148
3725	ENSMUSG00000000902.13	Smarcb1	chr10	-	75916772	75916911	75916799	75916911	75915063	75915193	3725	128,80	159157	346457	329336	126	99	0.000259662	0.00646343	0.387,0.286	0.452,0.517	-0.148
7487	ENSMUSG00000035953.14	Pip4p1	chr14	-	50930428	50930813	50930633	50930813	50930133	50930324	7487	63,39	120,96	66,51	68,48	198	99	0.000164272	0.00452954	0.208,0.169	0.327,0.347	-0.148
10608	ENSMUSG00000032633.12	Flcn	chr11	-	59795366	59795575	59795506	59795575	59795140	59795264	10608	23,29	1,4	3,2	0,0	198	99	0.00328334	0.0493658	0.92,0.784	1.0,1.0	-0.148
26078	ENSMUSG00000039671.18	Zmynd8	chr2	-	165883797	165884210	165884178	165884210	165875704	165875775	26078	0,0	21,15	9,1	13,12	198	99	6.22171e-05	0.00202746	0.0,0.0	0.257,0.04	-0.148
16346	ENSMUSG00000028081.6	Rps3a1	chr3	-	86142215	86142702	86142509	86142702	86141697	86141801	16346	1,0	37,35	12,10	28,33	198	99	1.05794e-07	7.76711e-06	0.013,0.0	0.176,0.132	-0.147
24665	ENSMUSG00000062646.12	Ganc	chr2	+	120404972	120405408	120404972	120405059	120406265	120406328	24665	0,1	12,8	10,3	11,35	198	99	0.00152206	0.0270642	0.0,0.059	0.312,0.041	-0.147
33300	ENSMUSG00000013858.14	Tmem259	chr10	-	79977962	79978605	79978187	79978605	79977357	79977799	33300	32,27	2,3	68,60	0,0	198	99	0.00230931	0.0373946	0.889,0.818	1.0,1.0	-0.147
10136	ENSMUSG00000017550.14	Atad5	chr11	+	80109363	80109523	80109363	80109495	80109946	80110135	10136	17,20	2,3	41,50	0,0	127	99	0.00235331	0.0379319	0.869,0.839	1.0,1.0	-0.146
12470	ENSMUSG00000029152.13	Ociad1	chr5	+	73306577	73306798	73306577	73306729	73310273	73310426	12470	79,63	13,5	142147	3,1	168	99	3.07304e-06	0.000155846	0.782,0.881	0.965,0.989	-0.145
4476	ENSMUSG00000024949.17	Sf1	chr19	+	6365663	6365955	6365663	6365792	6368363	6368467	4476	59,47	459366	203125	325305	198	99	0	0	0.06,0.06	0.238,0.17	-0.144
22494	ENSMUSG00000021327.19	Zkscan3	chr13	-	21402391	21402755	21402671	21402755	21396438	21396574	22494	2,1	18,15	20,32	78,46	198	99	0.000504678	0.0112745	0.053,0.032	0.114,0.258	-0.144
870	ENSMUSG00000001034.17	Mapk7	chr11	-	61493523	61494266	61493646	61494266	61492903	61493185	870	37,30	0,6	58,39	0,0	198	99	0.00123058	0.0227135	1.0,0.714	1.0,1.0	-0.143
7107	ENSMUSG00000033004.15	Mycbp2	chr14	-	103262681	103262821	103262701	103262821	103260195	103260277	7107	2,0	90,83	9,6	37,32	119	99	2.97875e-07	1.94538e-05	0.018,0.0	0.168,0.135	-0.143
2666	ENSMUSG00000024002.18	Brd4	chr17	-	32224083	32224222	32224086	32224222	32221872	32222165	2666	4,5	108106	5,7	33,22	102	99	0.00117664	0.0220143	0.035,0.044	0.128,0.236	-0.142
24559	ENSMUSG00000034127.15	Tspan8	chr10	+	115817282	115817388	115817282	115817350	115817492	115817660	24559	19,16	209223	77,85	259221	137	99	2.73315e-12	5.22511e-10	0.062,0.049	0.177,0.217	-0.142
31207	ENSMUSG00000033379.13	Atp6v0b	chr4	-	117887015	117887333	117887169	117887333	117886589	117886694	31207	57,70	73,73	136113	78,77	198	99	0.000929251	0.018447	0.281,0.324	0.466,0.423	-0.142
694	ENSMUSG00000049882.10	Vcpkmt	chr12	-	69582519	69582630	69582530	69582630	69581117	69581237	694	17,18	6,0	44,41	0,0	110	99	0.00125503	0.0230789	0.718,1.0	1.0,1.0	-0.141
2654	ENSMUSG00000027881.14	Prpf38b	chr3	-	108908325	108908404	108908335	108908404	108907931	108908083	2654	37,21	233230	75,84	219230	109	99	2.68059e-08	2.29151e-06	0.126,0.077	0.237,0.249	-0.141
34498	ENSMUSG00000085457.3	1110046J04Rik	chr13	+	33936031	33936097	33936031	33936083	33953316	33953541	34498	41,35	9,4	73,66	0,2	113	99	1.1641e-05	0.000492889	0.8,0.885	1.0,0.967	-0.141
29063	ENSMUSG00000057666.18	Gapdh	chr6	-	125164898	125165298	125165096	125165298	125163345	125163436	29063	900806	85,66	971686	2,6	198	99	0	0	0.841,0.859	0.996,0.983	-0.14
31072	ENSMUSG00000036580.15	Spg20	chr3	+	55112112	55112608	55112112	55112217	55116983	55117795	31072	35,29	269278	40,37	91,69	198	99	6.49398e-11	9.48362e-09	0.061,0.05	0.18,0.211	-0.14
869	ENSMUSG00000001034.17	Mapk7	chr11	-	61493505	61494266	61493646	61494266	61492903	61493185	869	37,31	0,6	58,39	0,0	198	99	0.00125303	0.0230738	1.0,0.721	1.0,1.0	-0.139
2332	ENSMUSG00000087211.7	Lhx1os	chr11	+	84534479	84534660	84534479	84534560	84535115	84535221	2332	0,0	5,11	4,5	14,14	198	99	0.000407631	0.00950356	0.0,0.0	0.125,0.152	-0.139
2681	ENSMUSG00000036980.13	Taf6	chr5	-	138186961	138187226	138187169	138187226	138184331	138184547	2681	35,45	138152	126153	181216	198	99	6.79919e-08	5.2826e-06	0.113,0.129	0.258,0.262	-0.139
9469	ENSMUSG00000020776.18	Fbf1	chr11	-	116157291	116157785	116157688	116157785	116155957	116156035	9469	1,0	35,33	30,12	60,59	198	99	3.39931e-08	2.85181e-06	0.014,0.0	0.2,0.092	-0.139
13788	ENSMUSG00000054894.6	Dmac2l	chr12	+	69724961	69725018	69724961	69725014	69737950	69738061	13788	0,0	14,15	4,4	19,31	103	99	0.000670589	0.0141303	0.0,0.0	0.168,0.11	-0.139
29587	ENSMUSG00000027522.15	Stx16	chr2	+	174077123	174077189	174077123	174077138	174090620	174090734	29587	13,14	99,96	39,30	91,68	150	99	7.8457e-06	0.000351042	0.08,0.088	0.22,0.226	-0.139
3423	ENSMUSG00000031583.13	Wrn	chr8	-	33342976	33343692	33343546	33343692	33335996	33336146	3423	62,58	5,6	113123	2,0	198	99	4.27314e-05	0.00148449	0.861,0.829	0.966,1.0	-0.138
5241	ENSMUSG00000023944.14	Hsp90ab1	chr17	-	45568857	45569387	45569239	45569387	45568215	45568545	5241	370378	40,31	365402	3,6	198	99	1.60394e-12	3.20219e-10	0.822,0.859	0.984,0.971	-0.137
8497	ENSMUSG00000042063.11	Zfp386	chr12	+	116054721	116054953	116054721	116054844	116058904	116063360	8497	0,0	2,5	4,7	25,14	198	99	0.0010085	0.0196492	0.0,0.0	0.074,0.2	-0.137
28957	ENSMUSG00000022248.14	Rad1	chr15	+	10486017	10486264	10486017	10486072	10486452	10486716	28957	68,54	3,11	239239	6,6	198	99	0.00221703	0.0361791	0.919,0.711	0.952,0.952	-0.137
31888	ENSMUSG00000070371.11	Prss36	chr7	-	127934354	127934623	127934389	127934623	127934138	127934280	31888	0,0	11,9	4,5	24,19	134	99	0.000442895	0.0101827	0.0,0.0	0.11,0.163	-0.137
1931	ENSMUSG00000060961.15	Slc4a4	chr5	+	89046212	89046392	89046212	89046365	89084641	89084718	1931	117111	16,20	20,19	0,1	126	99	0.000176251	0.00477142	0.852,0.813	1.0,0.937	-0.136
24536	ENSMUSG00000026238.14	Ptma	chr1	+	86529181	86529552	86529181	86529244	86529964	86530712	24536	95,79	12,6	361262	2,7	198	99	2.64647e-06	0.000137529	0.798,0.868	0.989,0.949	-0.136
1409	ENSMUSG00000034007.10	Scaper	chr9	-	55864385	55864604	55864403	55864604	55859747	55859918	1409	1,5	72,85	7,12	29,54	117	99	4.02886e-05	0.00141837	0.012,0.047	0.17,0.158	-0.135
33975	ENSMUSG00000032178.14	Ilf3	chr9	+	21387703	21388150	21387703	21387797	21388523	21388753	33975	230195	361324	227210	170201	198	99	2.60318e-06	0.000135727	0.242,0.231	0.4,0.343	-0.135
1060	ENSMUSG00000015942.9	Gtf2ird2	chr5	+	134191179	134191427	134191179	134191277	134192652	134192791	1060	1,0	13,15	14,12	41,32	198	99	3.81626e-05	0.00136023	0.037,0.0	0.146,0.158	-0.134
18181	ENSMUSG00000030629.15	Zfand6	chr7	-	84679318	84679396	84679343	84679396	84634238	84634409	18181	0,0	7,9	3,5	15,27	124	99	0.00100542	0.0196107	0.0,0.0	0.138,0.129	-0.134
18859	ENSMUSG00000036555.14	Iqce	chr5	-	140701793	140702265	140702181	140702265	140699684	140699732	18859	3,0	13,24	20,30	62,50	198	99	0.000106433	0.00320973	0.103,0.0	0.139,0.231	-0.134
1064	ENSMUSG00000029166.14	Mapre3	chr5	+	30862497	30863405	30862497	30862643	30864573	30864728	1064	55,45	10,0	35,36	0,0	198	99	0.000277329	0.00683442	0.733,1.0	1.0,1.0	-0.133
6866	ENSMUSG00000022607.17	Ptk2	chr15	-	73242985	73243247	73243034	73243247	73242365	73242477	6866	0,0	1,1	3,6	20,19	148	99	0.00171434	0.0296314	0.0,0.0	0.091,0.174	-0.133
26088	ENSMUSG00000004565.15	Pnpla6	chr8	+	3516660	3517001	3516660	3516749	3517076	3517164	26088	1,2	22,18	17,13	34,40	198	99	0.000195397	0.00518822	0.022,0.053	0.2,0.14	-0.133
26714	ENSMUSG00000036980.13	Taf6	chr5	-	138187062	138187205	138187169	138187205	138184331	138184547	26714	27,38	138152	117123	181216	198	99	3.80743e-08	3.13581e-06	0.089,0.111	0.244,0.222	-0.133
1067	ENSMUSG00000062822.8	4833420G17Rik	chr13	+	119473832	119474194	119473832	119473956	119474832	119474924	1067	16,12	75,37	155,90	165207	198	99	0.000380123	0.008975	0.096,0.14	0.32,0.179	-0.132
21534	ENSMUSG00000054387.13	Mdm4	chr1	-	133008982	133009151	133009136	133009151	133003790	133003890	21534	5,4	36,35	42,17	58,64	198	99	0.000370428	0.00878257	0.065,0.054	0.266,0.117	-0.132
15893	ENSMUSG00000085024.1	C230035I16Rik	chr13	-	23430185	23430352	23430228	23430352	23428304	23428412	15893	0,0	5,1	3,5	18,19	142	99	0.00149237	0.0267018	0.0,0.0	0.104,0.155	-0.13
677	ENSMUSG00000021238.11	Aldh6a1	chr12	-	84442070	84443788	84443728	84443788	84441762	84441924	677	56,40	0,7	20,23	0,0	198	99	0.00136341	0.0246602	1.0,0.741	1.0,1.0	-0.129
24088	ENSMUSG00000040782.12	Cop1	chr1	+	159266733	159266923	159266733	159266810	159268108	159268185	24088	79,56	6,4	58,55	0,0	198	99	8.98678e-05	0.00278467	0.868,0.875	1.0,1.0	-0.129
29069	ENSMUSG00000057666.18	Gapdh	chr6	-	125165230	125165298	125165284	125165298	125163345	125163436	29069	782676	124,86	248190	7,8	153	99	3.54779e-09	3.62173e-07	0.803,0.836	0.958,0.939	-0.129
30547	ENSMUSG00000003429.11	Rps11	chr7	-	45124027	45124335	45124099	45124335	45123418	45123550	30547	0,0	5,8	6,0	10,1	171	99	0.000569969	0.0123994	0.0,0.0	0.258,0.0	-0.129
32	ENSMUSG00000004221.16	Ikbkg	chrX	+	74427761	74427902	74427761	74427874	74432804	74433006	32	8,1	75,37	30,30	89138	127	99	0.000192388	0.00512127	0.077,0.021	0.208,0.145	-0.128
19700	ENSMUSG00000041498.13	Kif14	chr1	+	136466342	136466646	136466342	136466398	136467847	136469174	19700	0,2	16,25	4,10	24,18	198	99	0.000461834	0.0105261	0.0,0.038	0.077,0.217	-0.128
3723	ENSMUSG00000032480.17	Dhx30	chr9	-	110115035	110115582	110115490	110115582	110112970	110113090	3723	224154	21,22	162143	3,7	198	99	9.94688e-05	0.00303447	0.842,0.778	0.964,0.911	-0.127
2949	ENSMUSG00000031169.13	Porcn	chrX	-	8198205	8199152	8199066	8199152	8197974	8198085	2949	8,5	87,71	7,12	20,27	198	99	0.000116718	0.00345056	0.044,0.034	0.149,0.182	-0.126
14184	ENSMUSG00000040785.19	Ttc3	chr16	+	94383921	94384388	94383921	94384066	94384783	94384934	14184	615540	151143	11531085	164137	198	99	1.85401e-06	9.91162e-05	0.671,0.654	0.779,0.798	-0.126
26079	ENSMUSG00000039671.18	Zmynd8	chr2	-	165883977	165884210	165884178	165884210	165875704	165875775	26079	1,0	21,15	8,1	13,12	198	99	0.000465564	0.0105805	0.023,0.0	0.235,0.04	-0.126
3277	ENSMUSG00000003402.14	Prkcsh	chr9	+	22011437	22011596	22011437	22011575	22011673	22011770	3277	394308	497375	322392	248285	120	99	5.72566e-05	0.00189121	0.395,0.404	0.517,0.532	-0.125
743	ENSMUSG00000056962.11	Jmjd6	chr11	-	116839837	116840545	116840447	116840545	116838989	116839128	743	717681	82,91	735705	28,30	198	99	2.38566e-10	3.14867e-08	0.814,0.789	0.929,0.922	-0.124
26921	ENSMUSG00000034211.14	Mrps17	chr5	+	129715557	129715910	129715557	129715794	129716726	129716866	26921	113,89	20,16	475509	41,38	198	99	0.00165309	0.0288095	0.739,0.736	0.853,0.87	-0.124
784	ENSMUSG00000020918.14	Kat2a	chr11	-	100710249	100710636	100710444	100710636	100709382	100709489	784	12,11	202111	79,62	188179	198	99	7.46514e-13	1.59108e-10	0.029,0.047	0.174,0.148	-0.123
14142	ENSMUSG00000019261.3	Map1s	chr8	+	70911817	70912266	70911817	70911928	70912512	70912653	14142	4,6	164128	37,21	83,97	198	99	1.37212e-12	2.7891e-10	0.012,0.023	0.182,0.098	-0.123
14828	ENSMUSG00000034724.18	Cnot6l	chr5	-	96161128	96161547	96161361	96161547	96134010	96134132	14828	0,0	11,5	3,6	20,14	198	99	0.000664525	0.0140306	0.0,0.0	0.07,0.176	-0.123
27976	ENSMUSG00000117748.1	Chtf8	chr8	-	106886919	106887356	106887300	106887356	106886304	106886526	27976	148152	48,39	498687	85104	198	99	0.000959013	0.0189306	0.607,0.661	0.746,0.768	-0.123
1506	ENSMUSG00000029148.15	Nrbp1	chr5	+	31244165	31244559	31244165	31244288	31244876	31244966	1506	194188	20,8	650743	2,0	198	99	1.94289e-14	4.75089e-12	0.829,0.922	0.994,1.0	-0.122
17376	ENSMUSG00000046688.14	Tifa	chr3	+	127790654	127790929	127790654	127790724	127791472	127791529	17376	0,0	1,2	6,7	25,22	198	99	0.00154953	0.0273674	0.0,0.0	0.107,0.137	-0.122
18359	ENSMUSG00000024561.10	Mbd1	chr18	+	74277516	74277592	74277516	74277578	74278678	74281234	18359	2,0	21,35	17,3	43,38	113	99	0.000331964	0.00798636	0.077,0.0	0.257,0.065	-0.122
26266	ENSMUSG00000039069.19	Mtg2	chr2	+	180070587	180070635	180070587	180070615	180071793	180071886	26266	0,1	25,21	12,10	56,55	119	99	6.40547e-05	0.00207634	0.0,0.038	0.151,0.131	-0.122
26709	ENSMUSG00000036980.13	Taf6	chr5	-	138187030	138187205	138187169	138187205	138184331	138184547	26709	24,33	138152	103108	181216	198	99	9.38411e-08	6.99793e-06	0.08,0.098	0.222,0.2	-0.122
33581	ENSMUSG00000025158.7	Rfng	chr11	-	120782628	120783078	120783006	120783078	120782382	120782548	33581	65,59	6,5	96,72	3,0	198	99	0.00245381	0.0392908	0.844,0.855	0.941,1.0	-0.121
32439	ENSMUSG00000031540.13	Kat6a	chr8	+	22925280	22925442	22925280	22925292	22926376	22926470	32439	38,45	6,0	75,36	0,0	198	99	0.00197548	0.0330826	0.76,1.0	1.0,1.0	-0.12
12082	ENSMUSG00000022884.15	Eif4a2	chr16	+	23111202	23111588	23111202	23111263	23111816	23112409	12082	128109	21,4	312288	8,4	198	99	8.19761e-05	0.00256533	0.753,0.932	0.951,0.973	-0.119
20002	ENSMUSG00000026000.16	Lancl1	chr1	-	67038771	67038834	67038803	67038834	67038494	67038591	20002	46,35	3,5	24,46	0,0	131	99	0.000489882	0.011011	0.921,0.841	1.0,1.0	-0.119
1298	ENSMUSG00000029122.11	Evc	chr5	-	37300734	37300923	37300811	37300923	37300438	37300500	1298	1,3	22,12	18,12	34,37	176	99	0.003035	0.046519	0.025,0.123	0.229,0.154	-0.118
536	ENSMUSG00000063506.14	Arhgap22	chr14	+	33364392	33364525	33364392	33364514	33366569	33367443	536	0,0	18,22	2,6	23,28	110	99	0.000367703	0.00873405	0.0,0.0	0.073,0.162	-0.117
28140	ENSMUSG00000092417.3	Gpank1	chr17	+	35121481	35121915	35121481	35121550	35123052	35123659	28140	42,28	93,92	65,63	92,77	198	99	0.000625842	0.0133389	0.184,0.132	0.261,0.29	-0.117
34425	ENSMUSG00000032308.9	Ulk3	chr9	+	57590660	57590781	57590660	57590776	57591213	57591318	34425	41,25	9,2	63,32	0,1	104	99	4.75263e-05	0.00160683	0.813,0.922	1.0,0.968	-0.117
13693	ENSMUSG00000028937.14	Acot7	chr4	+	152185764	152186156	152185764	152185896	152206763	152206881	13693	6,3	39,39	16,13	28,49	198	99	0.00189015	0.0319522	0.071,0.037	0.222,0.117	-0.116
24045	ENSMUSG00000005886.14	Ncoa2	chr1	-	13373590	13374029	13373937	13374029	13285968	13286025	24045	0,2	47,49	4,5	18,14	198	99	0.000143812	0.00406579	0.0,0.02	0.1,0.152	-0.116
29065	ENSMUSG00000057666.18	Gapdh	chr6	-	125164898	125165298	125165284	125165298	125163345	125163436	29065	13681176	124,86	706518	7,8	198	99	2.22045e-16	6.86684e-14	0.847,0.872	0.981,0.97	-0.116
4890	ENSMUSG00000117694.1	Gm28285	chr18	+	35557336	35557422	35557336	35557396	35571842	35572285	4890	60,42	5,7	210224	1,6	125	99	9.30789e-05	0.00287288	0.905,0.826	0.994,0.967	-0.115
6998	ENSMUSG00000022412.14	Mief1	chr15	+	80234079	80234181	80234079	80234132	80234681	80234780	6998	28,30	0,6	14,43	0,0	148	99	0.00181446	0.0309715	1.0,0.77	1.0,1.0	-0.115
8718	ENSMUSG00000002768.8	Mea1	chr17	+	46681002	46681458	46681002	46681133	46681616	46681897	8718	0,0	13,9	8,7	27,31	198	99	0.00014368	0.00406579	0.0,0.0	0.129,0.101	-0.115
9832	ENSMUSG00000018666.13	Cbx1	chr11	+	96802727	96802998	96802727	96802822	96806615	96806794	9832	59,40	586459	468340	10381084	198	99	0	0	0.048,0.042	0.184,0.136	-0.115
13801	ENSMUSG00000001323.17	Srr	chr11	-	74925275	74925675	74925618	74925675	74919436	74919662	13801	0,0	14,13	4,4	21,12	198	99	0.00104468	0.0200691	0.0,0.0	0.087,0.143	-0.115
18971	ENSMUSG00000107789.1	Gm44965	chr6	+	48613177	48613313	48613177	48613259	48619224	48619278	18971	2,4	74,50	6,6	22,23	153	99	0.00101921	0.0198089	0.017,0.049	0.15,0.144	-0.114
19994	ENSMUSG00000039630.10	Hnrnpu	chr1	-	178325220	178325313	178325242	178325313	178323619	178323713	19994	1,0	14,11	10,7	53,33	121	99	0.000920278	0.0183034	0.055,0.0	0.134,0.148	-0.114
4833	ENSMUSG00000024807.18	Syvn1	chr19	+	6050521	6050833	6050521	6050685	6050940	6051069	4833	0,0	10,8	6,4	20,19	198	99	0.000498709	0.0111807	0.0,0.0	0.13,0.095	-0.113
9941	ENSMUSG00000059474.13	Mbtd1	chr11	+	93908803	93908943	93908803	93908937	93910282	93910406	9941	54,32	235212	107,95	257273	105	99	5.64704e-05	0.00187112	0.178,0.125	0.282,0.247	-0.113
25440	ENSMUSG00000001248.15	Gramd1a	chr7	-	31135688	31135739	31135707	31135739	31134413	31134517	25440	56,50	6,7	39,49	1,0	118	99	0.00010374	0.00314322	0.887,0.857	0.97,1.0	-0.113
32191	ENSMUSG00000036061.10	Smug1	chr15	-	103158125	103158227	103158156	103158227	103157616	103157918	32191	2,1	27,17	14,32	82,94	130	99	0.00154691	0.0273366	0.053,0.043	0.115,0.206	-0.113
10475	ENSMUSG00000041189.9	Chrnb1	chr11	-	69794896	69795013	69794968	69795013	69794149	69794259	10475	0,0	28,26	4,10	28,33	171	99	1.48089e-05	0.000605092	0.0,0.0	0.076,0.149	-0.112
28139	ENSMUSG00000092417.3	Gpank1	chr17	+	35121481	35121711	35121481	35121550	35123052	35123659	28139	44,29	93,92	65,63	92,77	198	99	0.00122285	0.0225974	0.191,0.136	0.261,0.29	-0.112
29708	ENSMUSG00000060427.15	Zfp868	chr8	-	69625076	69625548	69625434	69625548	69619313	69619671	29708	18,17	85,72	105,97	189182	198	99	2.76569e-05	0.0010448	0.096,0.106	0.217,0.21	-0.112
33010	ENSMUSG00000034863.9	Ano8	chr8	-	71481951	71482186	71482132	71482186	71480435	71481242	33010	90,61	8,4	131143	1,2	198	99	0.000222096	0.00572368	0.849,0.884	0.985,0.973	-0.112
2970	ENSMUSG00000057666.18	Gapdh	chr6	-	125165096	125165311	125165284	125165311	125163345	125163436	2970	14421232	124,86	708519	7,8	198	99	1.66533e-15	4.6903e-13	0.853,0.877	0.981,0.97	-0.111
4443	ENSMUSG00000056629.16	Fkbp2	chr19	-	6978557	6979047	6978972	6979047	6978389	6978436	4443	301278	19,17	656593	0,0	198	99	9.99201e-16	2.94568e-13	0.888,0.891	1.0,1.0	-0.111
21601	ENSMUSG00000026605.14	Cenpf	chr1	-	189684862	189685138	189684944	189685138	189683537	189683964	21601	13,7	81,86	19,24	55,57	181	99	9.38176e-05	0.00289285	0.081,0.043	0.159,0.187	-0.111
3272	ENSMUSG00000063550.8	Nup98	chr7	-	102180376	102180515	102180427	102180515	102176312	102176405	3272	56,66	321307	57,67	127159	150	99	6.08332e-06	0.000283445	0.103,0.124	0.229,0.218	-0.11
29051	ENSMUSG00000057666.18	Gapdh	chr6	-	125165154	125165311	125165284	125165311	125163134	125163436	29051	14371233	124,86	711525	7,8	198	99	1.22125e-15	3.50209e-13	0.853,0.878	0.981,0.97	-0.11
14452	ENSMUSG00000042625.16	Safb2	chr17	-	56570933	56571319	56571209	56571319	56568990	56569022	14452	18,24	73,54	95,44	116,79	198	99	0.00105305	0.0201439	0.11,0.182	0.291,0.218	-0.109
13804	ENSMUSG00000001323.17	Srr	chr11	-	74925352	74925675	74925618	74925675	74919436	74919662	13804	0,0	14,13	5,3	21,12	198	99	0.00105497	0.0201562	0.0,0.0	0.106,0.111	-0.108
21332	ENSMUSG00000044328.13	Trp53i13	chr11	-	77512667	77512965	77512896	77512965	77509597	77509726	21332	66,52	3,4	19,24	0,0	198	99	0.00310469	0.0473352	0.917,0.867	1.0,1.0	-0.108
21742	ENSMUSG00000020477.10	Mrps24	chr11	-	5707619	5707667	5707644	5707667	5707486	5707555	21742	0,1	18,18	10,0	23,4	124	99	0.000427296	0.0098962	0.0,0.042	0.258,0.0	-0.108
3449	ENSMUSG00000031858.16	Mau2	chr8	-	70023606	70023697	70023610	70023697	70022619	70022669	3449	1,1	50,43	29,16	131176	103	99	2.07823e-05	0.000807336	0.019,0.022	0.175,0.08	-0.107
5130	ENSMUSG00000061950.17	Ppp4r1	chr17	+	65782779	65783214	65782779	65783019	65783623	65783668	5130	1,0	15,4	4,5	15,17	198	99	0.00308033	0.0471221	0.032,0.0	0.118,0.128	-0.107
10798	ENSMUSG00000007850.16	Hnrnph1	chr11	+	50379820	50380281	50379820	50379964	50381458	50382137	10798	175135	878707	935680	15551790	198	99	1.1332e-12	2.33633e-10	0.091,0.087	0.231,0.16	-0.107
25427	ENSMUSG00000001248.15	Gramd1a	chr7	-	31135525	31135739	31135557	31135739	31134413	31134517	25427	30,39	4,2	82,62	0,0	131	99	0.00214899	0.035251	0.85,0.936	1.0,1.0	-0.107
26072	ENSMUSG00000039671.18	Zmynd8	chr2	-	165845743	165846235	165846020	165846235	165842782	165842877	26072	6,12	135106	48,22	91124	198	99	8.91671e-07	5.14854e-05	0.022,0.054	0.209,0.081	-0.107
2222	ENSMUSG00000053332.13	Gas5	chr1	+	161037287	161037547	161037287	161037315	161038224	161038272	2222	114115	13,2	548453	0,2	198	99	6.47157e-08	5.06549e-06	0.814,0.966	1.0,0.991	-0.106
8054	ENSMUSG00000021483.8	Cdk20	chr13	+	64437374	64437671	64437374	64437512	64437876	64438032	8054	0,0	9,9	5,4	18,20	198	99	0.00110183	0.0208496	0.0,0.0	0.122,0.091	-0.106
21974	ENSMUSG00000026447.16	Pik3c2b	chr1	+	133046011	133046423	133046011	133046074	133066211	133068033	21974	91,57	3,5	15,16	0,0	198	99	0.00195849	0.0328784	0.938,0.851	1.0,1.0	-0.106
15488	ENSMUSG00000002625.10	Akap8l	chr17	-	32338298	32338514	32338456	32338514	32336472	32336738	15488	312222	21,15	139163	2,0	198	99	5.03802e-07	3.14692e-05	0.881,0.881	0.972,1.0	-0.105
30991	ENSMUSG00000066406.15	Akap13	chr7	+	75697301	75697434	75697301	75697377	75704364	75704539	30991	73,65	9,2	30,34	0,0	156	99	0.000321818	0.00776697	0.837,0.954	1.0,1.0	-0.105
1501	ENSMUSG00000036180.15	Gatad2a	chr8	-	69912901	69913224	69912922	69913224	69911676	69911869	1501	7,2	225192	6,11	55,48	120	99	3.13321e-06	0.000158134	0.025,0.009	0.083,0.159	-0.104
1170	ENSMUSG00000011257.19	Pabpc4	chr4	+	123288958	123289213	123288958	123289074	123290198	123290338	1170	371368	16731497	269224	477466	198	99	4.33834e-11	6.57926e-09	0.1,0.109	0.22,0.194	-0.103
2267	ENSMUSG00000002728.14	Naa20	chr2	+	145911672	145911793	145911672	145911763	145912392	145912528	2267	7,13	228256	385287	18211516	129	99	6.09512e-14	1.40339e-11	0.023,0.038	0.14,0.127	-0.103
11590	ENSMUSG00000058799.16	Nap1l1	chr10	+	111496039	111496170	111496039	111496105	111496753	111496884	11590	1146827	852682	12771406	660730	164	99	0.000200795	0.00529146	0.448,0.423	0.539,0.538	-0.103
16229	ENSMUSG00000031851.14	Ntpcr	chr8	+	125736067	125736230	125736067	125736225	125737322	125737419	16229	160144	47,58	235246	47,42	104	99	0.000977528	0.019207	0.764,0.703	0.826,0.848	-0.103
16361	ENSMUSG00000028081.6	Rps3a1	chr3	-	86142422	86142702	86142509	86142702	86141697	86141801	16361	0,0	37,35	7,6	28,33	186	99	1.92362e-05	0.000760384	0.0,0.0	0.117,0.088	-0.103
1169	ENSMUSG00000038520.15	Tbc1d17	chr7	-	44842185	44842300	44842202	44842300	44841982	44842099	1169	12,11	182159	28,13	80123	116	99	0.00055374	0.0121216	0.053,0.056	0.23,0.083	-0.102
1672	ENSMUSG00000055296.14	Tmem245	chr4	-	56903353	56904049	56903917	56904049	56899305	56899428	1672	14,13	190114	27,19	83,52	198	99	1.28875e-06	7.28537e-05	0.036,0.054	0.14,0.154	-0.102
3232	ENSMUSG00000046591.10	Ticrr	chr7	+	79680907	79681047	79680907	79681008	79681809	79681903	3232	0,0	12,23	6,2	31,16	138	99	0.000997988	0.0195168	0.0,0.0	0.122,0.082	-0.102
30416	ENSMUSG00000051444.9	Bbs12	chr3	+	37312553	37312941	37312553	37312585	37319049	37321450	30416	0,3	16,12	39,40	114,99	198	99	0.00193266	0.0325314	0.0,0.111	0.146,0.168	-0.102
3124	ENSMUSG00000040225.15	Prrc2c	chr1	-	162679484	162679607	162679499	162679607	162678009	162678228	3124	8,10	163129	21,19	112,83	114	99	5.46336e-05	0.00182367	0.041,0.063	0.14,0.166	-0.101
18943	ENSMUSG00000026049.11	Tex30	chr1	-	44101804	44101957	44101899	44101957	44099847	44099935	18943	0,0	7,1	6,8	44,26	194	99	0.00176953	0.0303854	0.0,0.0	0.065,0.136	-0.101
20023	ENSMUSG00000069633.12	Pex11g	chr8	-	3463655	3464100	3463921	3464100	3460271	3460334	20023	0,0	11,16	8,14	49,48	198	99	8.28409e-05	0.0025847	0.0,0.0	0.075,0.127	-0.101
22080	ENSMUSG00000037761.16	Actr5	chr2	+	158631462	158631684	158631462	158631680	158632271	158632454	22080	1,0	9,12	7,8	41,41	103	99	0.00210829	0.0347279	0.096,0.0	0.141,0.158	-0.101
2438	ENSMUSG00000051736.8	Fam229b	chr10	-	39133822	39133900	39133878	39133900	39132246	39132378	2438	44,51	2,0	100,77	12,6	155	99	0.000913473	0.0182025	0.934,1.0	0.842,0.891	0.101
16845	ENSMUSG00000025470.11	Zfp511	chr7	+	140037397	140037640	140037397	140037581	140039325	140040602	16845	321227	17,15	232315	40,37	158	99	0.000112023	0.00333679	0.922,0.905	0.784,0.842	0.101
17157	ENSMUSG00000002602.16	Axl	chr7	-	25773098	25773405	25773342	25773405	25770632	25770765	17157	687543	111100	539587	147166	198	99	0.0005847	0.0126229	0.756,0.731	0.647,0.639	0.101
19398	ENSMUSG00000006494.11	Pdk1	chr2	+	71895688	71895864	71895688	71895799	71896417	71896493	19398	21,24	143105	0,0	22,13	164	99	3.26346e-05	0.00118871	0.081,0.121	0.0,0.0	0.101
26394	ENSMUSG00000025810.9	Nrp1	chr8	+	128480884	128480989	128480884	128480968	128487896	128487956	26394	90,59	9,2	243227	45,37	120	99	0.0028927	0.0448831	0.892,0.961	0.817,0.835	0.101
25526	ENSMUSG00000021051.10	Ppp2r5e	chr12	-	75459687	75459789	75459702	75459789	75452498	75453813	25526	87,88	0,0	88100	8,11	114	99	7.77603e-07	4.60092e-05	1.0,1.0	0.905,0.888	0.103
634	ENSMUSG00000023805.17	Synj2	chr17	+	6007937	6008110	6007937	6008099	6009731	6009813	634	162134	1,0	78,67	10,6	110	99	2.62346e-07	1.7422e-05	0.993,1.0	0.875,0.91	0.104
25055	ENSMUSG00000027115.14	Kif18a	chr2	+	109338566	109338676	109338566	109338672	109341157	109341747	25055	59,44	5,5	305259	57,75	103	99	0.00263964	0.0417576	0.919,0.894	0.837,0.768	0.104
16026	ENSMUSG00000028578.8	Caap1	chr4	-	94556461	94556796	94556595	94556796	94551264	94551465	16026	32,38	0,0	146160	10,8	198	99	0.000214258	0.00555346	1.0,1.0	0.88,0.909	0.105
21591	ENSMUSG00000008690.15	Ncaph2	chr15	+	89355762	89356024	89355762	89355926	89360355	89360457	21591	307250	188139	312314	281283	197	99	0.00138514	0.0250245	0.451,0.475	0.358,0.358	0.105
7639	ENSMUSG00000042323.17	Pbrm1	chr14	+	31019137	31019620	31019137	31019293	31022719	31022859	7639	25,12	64,36	6,4	57,45	198	99	0.000143844	0.00406579	0.163,0.143	0.05,0.043	0.106
11518	ENSMUSG00000020184.15	Mdm2	chr10	-	117709699	117710117	117709945	117710117	117705154	117705229	11518	327291	29,26	905793	141153	198	99	0.000125921	0.00367103	0.849,0.848	0.762,0.722	0.107
34248	ENSMUSG00000048537.16	Phldb1	chr9	-	44697721	44697836	44697751	44697836	44696036	44696183	34248	8,7	36,34	6,3	119,69	129	99	0.000896187	0.0179146	0.146,0.136	0.037,0.032	0.107
14964	ENSMUSG00000078485.3	Plekhn1	chr4	-	156231546	156231960	156231801	156231960	156231084	156231173	14964	50,40	1,1	156,96	9,12	198	99	0.0032344	0.0488629	0.962,0.952	0.897,0.8	0.108
30431	ENSMUSG00000063406.11	Tmed5	chr5	-	108125900	108126079	108126017	108126079	108121626	108124759	30431	293239	1,5	10631130	76,91	198	99	6.4309e-10	7.59761e-08	0.993,0.96	0.875,0.861	0.108
32740	ENSMUSG00000050914.16	Ankrd37	chr8	-	45999242	45999403	45999270	45999403	45998396	45998488	32740	35,49	0,0	35,29	3,3	127	99	0.00222816	0.036323	1.0,1.0	0.901,0.883	0.108
165	ENSMUSG00000024097.11	Srsf7	chr17	-	80204130	80204232	80204154	80204232	80202690	80202744	165	269178	21,5	26742227	427376	123	99	1.75391e-07	1.21062e-05	0.912,0.966	0.834,0.827	0.109
344	ENSMUSG00000041720.14	Pi4ka	chr16	-	17322987	17323070	17323036	17323070	17318482	17318553	344	159143	0,1	38,39	6,1	148	99	0.000435349	0.0100532	1.0,0.99	0.809,0.963	0.109
854	ENSMUSG00000024856.10	Cdk2ap2	chr19	+	4097400	4097733	4097400	4097507	4097816	4097917	854	334271	424389	97106	229308	198	99	1.35941e-06	7.56283e-05	0.283,0.258	0.175,0.147	0.109
20419	ENSMUSG00000024742.15	Fen1	chr19	-	10203687	10204023	10203803	10204023	10199137	10201097	20419	227168	20,15	769761	145125	198	99	0.00046389	0.0105577	0.85,0.848	0.726,0.753	0.109
2909	ENSMUSG00000030057.15	Cnbp	chr6	-	87845673	87845793	87845676	87845793	87845464	87845557	2909	164159	504330	868793	40273881	102	99	3.00263e-06	0.000152766	0.24,0.319	0.173,0.165	0.11
9163	ENSMUSG00000062352.14	Itgb1bp1	chr12	-	21285764	21286185	21286105	21286185	21279399	21279530	9163	157165	336280	152154	825600	198	99	1.1181e-10	1.56753e-08	0.189,0.228	0.084,0.114	0.11
9466	ENSMUSG00000020776.18	Fbf1	chr11	-	116146435	116146845	116146703	116146845	116145834	116146011	9466	30,42	0,1	89,41	7,3	198	99	0.00142299	0.025635	1.0,0.955	0.864,0.872	0.11
15046	ENSMUSG00000028256.16	Odf2l	chr3	+	145118587	145118928	145118587	145118786	145124210	145124375	15046	8,10	23,39	5,1	75,45	198	99	9.24789e-05	0.00285715	0.148,0.114	0.032,0.011	0.11
23165	ENSMUSG00000056050.13	Mia3	chr1	-	183330796	183331215	183331091	183331215	183329922	183329991	23165	74,73	0,0	150120	14,4	198	99	1.26467e-05	0.000527683	1.0,1.0	0.843,0.938	0.11
27696	ENSMUSG00000022297.15	Fzd6	chr15	+	39006279	39006583	39006279	39006432	39007224	39007718	27696	21,22	38,40	32,28	114142	198	99	0.00141756	0.0255809	0.216,0.216	0.123,0.09	0.11
447	ENSMUSG00000039458.15	Mtmr12	chr15	+	12236017	12236148	12236017	12236120	12237928	12238019	447	21,38	1,1	57,89	11,9	127	99	0.00245757	0.039331	0.942,0.967	0.802,0.885	0.111
15976	ENSMUSG00000055760.12	Gemin6	chr17	+	80224440	80224674	80224440	80224557	80225620	80225764	15976	14,19	0,0	161147	9,10	198	99	0.000663219	0.0140124	1.0,1.0	0.899,0.88	0.111
22620	ENSMUSG00000063884.6	Ptcd3	chr6	-	71895617	71895990	71895904	71895990	71894286	71894372	22620	13,6	0,0	93,52	3,5	198	99	0.00248514	0.0396918	1.0,1.0	0.939,0.839	0.111
23215	ENSMUSG00000026779.6	Mastl	chr2	-	23155678	23155897	23155824	23155897	23150987	23151125	23215	164151	2,2	145180	17,8	198	99	3.03238e-05	0.00111605	0.976,0.974	0.81,0.918	0.111
164	ENSMUSG00000024097.11	Srsf7	chr17	-	80204121	80204232	80204154	80204232	80202690	80202744	164	193184	21,5	23732060	427376	132	99	5.44642e-06	0.000257188	0.873,0.965	0.807,0.804	0.113
1019	ENSMUSG00000005625.15	Psmd4	chr3	-	95033908	95034026	95033917	95034026	95033632	95033764	1019	908791	881807	781827	12931253	108	99	2.53983e-05	0.000967588	0.486,0.473	0.356,0.377	0.113
1530	ENSMUSG00000037730.13	Mynn	chr3	+	30603503	30603800	30603503	30603670	30607036	30607830	1530	438421	74,50	291254	69,68	198	99	0.000864419	0.0174009	0.747,0.808	0.678,0.651	0.113
31289	ENSMUSG00000032737.13	Inppl1	chr7	-	101826551	101826841	101826753	101826841	101826192	101826271	31289	28,15	0,0	41,24	6,0	198	99	0.0010471	0.020091	1.0,1.0	0.774,1.0	0.113
729	ENSMUSG00000060147.15	Serpinb6a	chr13	-	33935572	33935794	33935618	33935794	33931471	33931646	729	522374	70,44	303278	70,76	145	99	4.55968e-05	0.00156168	0.836,0.853	0.747,0.714	0.114
7352	ENSMUSG00000047153.4	Khnyn	chr14	+	55887713	55887844	55887713	55887837	55887920	55888017	7352	114,85	4,1	61,32	4,8	106	99	0.00149657	0.0267315	0.964,0.988	0.934,0.789	0.114
32611	ENSMUSG00000031583.13	Wrn	chr8	-	33385341	33385472	33385441	33385472	33353294	33353399	32611	32,32	0,0	59,66	5,3	198	99	0.00104268	0.0200672	1.0,1.0	0.855,0.917	0.114
1529	ENSMUSG00000027660.16	Skil	chr3	+	31113407	31113640	31113407	31113502	31116815	31117039	1529	277230	115106	184204	129140	198	99	0.00208408	0.0344551	0.546,0.52	0.416,0.421	0.115
20003	ENSMUSG00000026000.16	Lancl1	chr1	-	67038771	67038834	67038823	67038834	67038494	67038591	20003	46,35	0,0	24,46	2,4	151	99	0.0018386	0.0312989	1.0,1.0	0.887,0.883	0.115
4925	ENSMUSG00000042834.15	Nrep	chr18	-	33463599	33463854	33463741	33463854	33463377	33463419	4925	25,28	0,0	73,55	2,6	198	99	0.000946406	0.0187169	1.0,1.0	0.948,0.821	0.116
33484	ENSMUSG00000037993.8	Dhx38	chr8	-	109554147	109554246	109554160	109554246	109553344	109553553	33484	161152	4,9	100118	16,21	112	99	9.8625e-06	0.000426168	0.973,0.937	0.847,0.832	0.116
1007	ENSMUSG00000042328.13	Hps4	chr5	+	112343094	112343163	112343094	112343122	112344540	112345048	1007	15,17	0,1	20,26	1,6	140	99	0.00318207	0.0481709	1.0,0.923	0.934,0.754	0.117
1328	ENSMUSG00000028689.14	Ccdc163	chr4	+	116710100	116710284	116710100	116710280	116711310	116711378	1328	41,46	2,1	47,57	14,4	103	99	0.0012932	0.0236205	0.952,0.978	0.763,0.932	0.117
14900	ENSMUSG00000028689.14	Ccdc163	chr4	+	116708888	116709273	116708888	116709094	116709437	116709619	14900	71,47	0,3	79,72	13,4	198	99	0.00248883	0.0397306	1.0,0.887	0.752,0.9	0.117
19350	ENSMUSG00000029328.15	Hnrnpdl	chr5	-	100038390	100038869	100038719	100038869	100037812	100037981	19350	738592	13561130	705430	28252602	198	99	0	0	0.214,0.208	0.111,0.076	0.117
18651	ENSMUSG00000035390.16	Brsk1	chr7	+	4692879	4692969	4692879	4692965	4694673	4694814	18651	18,14	78,80	2,4	55,65	103	99	0.000246135	0.00620824	0.182,0.144	0.034,0.056	0.118
21318	ENSMUSG00000068457.14	Uty	chrY	-	1199345	1199513	1199454	1199513	1197205	1197326	21318	7,6	21,18	7,5	115131	198	99	9.01043e-05	0.00278925	0.143,0.143	0.03,0.019	0.118
4024	ENSMUSG00000036959.15	Bcorl1	chrX	+	48367418	48367689	48367418	48367509	48367768	48371032	4024	5,1	17,4	0,0	13,9	198	99	0.00239835	0.0385201	0.128,0.111	0.0,0.0	0.119
19622	ENSMUSG00000026889.12	Rbm18	chr2	-	36127180	36127251	36127214	36127251	36122851	36122938	19622	98107	3,1	84,80	13,8	133	99	2.2272e-05	0.000857811	0.96,0.988	0.828,0.882	0.119
112	ENSMUSG00000024889.5	Rce1	chr19	-	4624659	4624763	4624684	4624763	4624013	4624181	112	34,28	61,65	47,36	137232	124	99	0.0018565	0.0315016	0.308,0.256	0.215,0.11	0.12
2881	ENSMUSG00000068329.12	Htra2	chr6	-	83053000	83053070	83053037	83053070	83052472	83052542	2881	4,12	1,0	118,84	18,29	136	99	0.00149657	0.0267315	0.744,1.0	0.827,0.678	0.12
1943	ENSMUSG00000023206.16	Il15ra	chr2	+	11718263	11718458	11718263	11718342	11720012	11720105	1943	19,16	1,0	108144	13,12	198	99	0.00153379	0.0271808	0.905,1.0	0.806,0.857	0.121
7525	ENSMUSG00000022403.15	St13	chr15	-	81399579	81400073	81399788	81400073	81392270	81392322	7525	29,17	0,0	43,44	0,7	198	99	0.00106485	0.0202836	1.0,1.0	1.0,0.759	0.121
23051	ENSMUSG00000010721.15	Lmbr1	chr5	-	29292822	29292949	29292840	29292949	29292151	29292220	23051	18,12	0,0	81,90	9,11	117	99	0.000212467	0.00552518	1.0,1.0	0.884,0.874	0.121
28698	ENSMUSG00000030061.16	Uba3	chr6	-	97204914	97205347	97205305	97205347	97201916	97201997	28698	30,27	0,0	104,44	0,7	198	99	0.0028387	0.044241	1.0,1.0	1.0,0.759	0.121
18725	ENSMUSG00000026281.15	Dtymk	chr1	-	93800507	93800906	93800801	93800906	93798379	93798470	18725	57,48	102103	192153	1025917	198	99	7.91032e-10	9.14004e-08	0.218,0.189	0.086,0.077	0.122
18728	ENSMUSG00000026281.15	Dtymk	chr1	-	93800675	93800906	93800801	93800906	93798379	93798470	18728	57,48	102103	192152	1025917	198	99	7.10882e-10	8.36718e-08	0.218,0.189	0.086,0.077	0.122
27786	ENSMUSG00000029767.16	Calu	chr6	+	29361297	29361753	29361297	29361487	29366039	29366206	27786	954879	556516	719927	705903	198	99	5.30762e-06	0.000251387	0.462,0.46	0.338,0.339	0.122
982	ENSMUSG00000034248.7	Slc25a37	chr14	-	69248882	69249622	69249393	69249622	69247580	69247637	982	319279	4,7	190165	21,13	198	99	6.04593e-07	3.70409e-05	0.976,0.952	0.819,0.864	0.123
8623	ENSMUSG00000024150.12	Mcfd2	chr17	-	87258749	87259092	87258933	87259092	87257927	87258089	8623	14,7	0,0	68,76	6,4	198	99	0.00104536	0.0200699	1.0,1.0	0.85,0.905	0.123
23157	ENSMUSG00000006471.18	Ndor1	chr2	-	25249099	25249320	25249152	25249320	25248904	25249012	23157	9,13	0,0	78,70	10,4	152	99	0.000599321	0.0128956	1.0,1.0	0.836,0.919	0.123
35243	ENSMUSG00000019810.15	Fuca2	chr10	+	13514706	13514874	13514706	13514806	13515116	13515543	35243	18,16	0,0	41,33	2,4	167	99	0.00300932	0.0462603	1.0,1.0	0.924,0.83	0.123
3347	ENSMUSG00000030852.17	Tacc2	chr7	+	130734948	130735243	130734948	130735150	130739811	130739873	3347	10,5	22,16	5,4	63,46	192	99	0.000851835	0.0172356	0.19,0.139	0.039,0.043	0.124
6377	ENSMUSG00000023009.14	Nckap5l	chr15	-	99423030	99423278	99423135	99423278	99422034	99422908	6377	5,2	10,20	0,0	20,20	198	99	0.0012586	0.0231014	0.2,0.048	0.0,0.0	0.124
2999	ENSMUSG00000022538.20	Lsg1	chr16	-	30577798	30577997	30577898	30577997	30574545	30574606	2999	9,5	0,0	36,41	1,5	198	99	0.0014424	0.0259401	1.0,1.0	0.947,0.804	0.125
23219	ENSMUSG00000049904.7	Tmem17	chr11	+	22512087	22512583	22512087	22512375	22517187	22517291	23219	7,11	0,0	92,78	5,7	198	99	0.0010446	0.0200691	1.0,1.0	0.902,0.848	0.125
26607	ENSMUSG00000032754.14	Slc8b1	chr5	+	120511167	120511507	120511167	120511283	120513119	120513332	26607	25,17	45,64	14,4	112,79	198	99	7.22003e-06	0.000329593	0.217,0.117	0.059,0.025	0.125
2233	ENSMUSG00000030980.17	Knop1	chr7	-	118852402	118853340	118852888	118853340	118850620	118850689	2233	249218	2,3	884992	79,85	198	99	7.74035e-11	1.12001e-08	0.984,0.973	0.848,0.854	0.127
15527	ENSMUSG00000030452.16	Nipa2	chr7	-	55961996	55962430	55962395	55962430	55961451	55961572	15527	96,90	0,5	344272	35,31	198	99	0.000130581	0.0037824	1.0,0.9	0.831,0.814	0.127
23026	ENSMUSG00000070858.12	Gm1673	chr5	+	33983432	33983900	33983432	33983564	33984051	33984140	23026	40,38	0,0	134118	13,6	198	99	4.40668e-05	0.00151814	1.0,1.0	0.837,0.908	0.127
33041	ENSMUSG00000031808.7	Slc27a1	chr8	+	71584632	71585076	71584632	71584770	71585345	71585492	33041	29,21	1,0	128,78	7,11	198	99	0.00110146	0.0208496	0.935,1.0	0.901,0.78	0.127
22048	ENSMUSG00000079677.2	Fdx1l	chr9	-	21073138	21073506	21073388	21073506	21068029	21068117	22048	51,70	0,0	76,52	4,5	198	99	0.000176372	0.00477142	1.0,1.0	0.905,0.839	0.128
26465	ENSMUSG00000039849.5	Pcif1	chr2	+	164879303	164879661	164879303	164879489	164882774	164883199	26465	284195	730586	14,16	318282	198	99	0	0	0.163,0.143	0.022,0.028	0.128
2048	ENSMUSG00000021819.11	Zswim8	chr14	+	20721170	20722053	20721170	20722029	20722142	20722319	2048	32,49	111,95	34,20	179160	123	99	0.000133795	0.00384025	0.188,0.293	0.133,0.091	0.129
16582	ENSMUSG00000115423.2	AL731706.1	chr2	-	136891042	136891389	136891278	136891389	136885472	136885700	16582	221178	9,12	1016803	159110	198	99	3.77725e-06	0.000188827	0.925,0.881	0.762,0.785	0.129
21819	ENSMUSG00000025968.16	Ndufs1	chr1	-	63176620	63176793	63176764	63176793	63176427	63176524	21819	89109	1,1	74,86	10,4	198	99	6.17803e-05	0.00201948	0.978,0.982	0.787,0.915	0.129
28534	ENSMUSG00000021666.16	Gfm2	chr13	+	97137936	97138026	97137936	97138009	97141926	97142010	28534	25,20	1,0	24,49	5,5	116	99	0.00103465	0.0199981	0.955,1.0	0.804,0.893	0.129
33	ENSMUSG00000031398.13	Plxna3	chrX	+	74333546	74333675	74333546	74333664	74333745	74333846	33	56,65	1,1	63,47	8,9	110	99	1.42406e-05	0.000584141	0.981,0.983	0.876,0.825	0.131
967	ENSMUSG00000035215.9	Lsm7	chr10	-	80854939	80855143	80855024	80855143	80854617	80854708	967	44,34	1,0	107,93	9,10	184	99	0.000153177	0.00428568	0.959,1.0	0.865,0.833	0.131
25364	ENSMUSG00000062604.11	Srpk2	chr5	-	23527896	23528062	23527923	23528062	23526789	23526815	25364	261218	74,52	149188	77,84	126	99	0.000392042	0.00922191	0.735,0.767	0.603,0.637	0.131
33054	ENSMUSG00000019763.11	Rmnd1	chr10	-	4432063	4432295	4432230	4432295	4429076	4429171	33054	7,8	0,0	63,69	7,3	198	99	0.00116525	0.0218271	1.0,1.0	0.818,0.92	0.131
35167	ENSMUSG00000038412.8	Higd1a	chr9	-	121856437	121856894	121856720	121856894	121852490	121852605	35167	114,72	0,2	53,37	2,6	198	99	0.000834793	0.016956	1.0,0.947	0.93,0.755	0.131
35168	ENSMUSG00000038412.8	Higd1a	chr9	-	121856449	121856894	121856720	121856894	121852490	121852605	35168	114,72	0,2	52,37	2,6	198	99	0.000796861	0.0163291	1.0,0.947	0.929,0.755	0.131
23148	ENSMUSG00000001289.12	Pfdn5	chr15	+	102326147	102326485	102326147	102326260	102326817	102326849	23148	16,16	1,0	41,34	6,3	198	99	0.00280494	0.0438015	0.889,1.0	0.774,0.85	0.132
32917	ENSMUSG00000002342.17	Tmem161a	chr8	+	70180705	70181047	70180705	70180868	70181148	70181323	32917	5,5	0,0	50,34	2,4	198	99	0.00239496	0.0384853	1.0,1.0	0.926,0.81	0.132
6598	ENSMUSG00000059714.13	Flot1	chr17	+	35824091	35824369	35824091	35824202	35824565	35824709	6598	285234	6,0	291262	25,25	198	99	2.22233e-09	2.34452e-07	0.96,1.0	0.853,0.84	0.133
6694	ENSMUSG00000042211.7	Fbxo38	chr18	-	62548611	62548695	62548652	62548695	62540880	62541046	6694	224235	71,96	130119	67,91	140	99	0.0031379	0.0477251	0.69,0.634	0.578,0.48	0.133
15107	ENSMUSG00000053317.11	Sec61b	chr4	+	47474763	47474839	47474763	47474777	47474911	47475009	15107	3,7	0,0	24,27	0,6	161	99	0.00126391	0.0231525	1.0,1.0	1.0,0.735	0.133
21818	ENSMUSG00000025968.16	Ndufs1	chr1	-	63176620	63176732	63176699	63176732	63176427	63176524	21818	56,60	0,0	45,66	5,4	178	99	0.000132073	0.00381513	1.0,1.0	0.833,0.902	0.133
25394	ENSMUSG00000023330.12	Dtwd1	chr2	+	126152140	126152577	126152140	126152529	126154545	126154860	25394	1,1	0,0	43,37	0,9	147	99	0.00215469	0.0353261	1.0,1.0	1.0,0.735	0.133
6290	ENSMUSG00000039568.6	Ubald1	chr16	-	4876227	4876417	4876361	4876417	4874777	4875869	6290	36,16	81,73	2,0	81,87	198	99	3.33178e-13	7.29845e-11	0.182,0.099	0.012,0.0	0.135
9089	ENSMUSG00000020572.8	Nampt	chr12	+	32830166	32830262	32830166	32830253	32833031	32833135	9089	224227	61,47	160138	78,64	108	99	0.000101564	0.00308348	0.771,0.816	0.653,0.664	0.135
18270	ENSMUSG00000016481.15	Cr1l	chr1	-	195131187	195131534	195131364	195131534	195129829	195130009	18270	127100	3,3	416418	55,41	198	99	8.85256e-06	0.000390007	0.955,0.943	0.791,0.836	0.135
26608	ENSMUSG00000032754.14	Slc8b1	chr5	+	120525658	120525800	120525658	120525796	120527740	120527862	26608	41,34	0,0	36,30	6,4	103	99	5.00489e-05	0.00168489	1.0,1.0	0.852,0.878	0.135
32226	ENSMUSG00000031075.18	Ano1	chr7	-	144648171	144648640	144648574	144648640	144648023	144648079	32226	45,35	45,61	68,69	194216	198	99	0.000423043	0.0098121	0.333,0.223	0.149,0.138	0.135
2351	ENSMUSG00000029439.14	Sfswap	chr5	+	129503982	129504152	129503982	129504105	129504762	129504894	2351	76,56	3,2	159122	24,20	146	99	0.000155141	0.00431168	0.945,0.95	0.818,0.805	0.136
1475	ENSMUSG00000005124.10	Ccn4	chr15	+	66906400	66906680	66906400	66906488	66912828	66913089	1475	57,50	1,1	165187	19,18	198	99	0.000124017	0.00363314	0.966,0.962	0.813,0.839	0.138
6276	ENSMUSG00000039473.8	Ubn1	chr16	+	5050733	5051010	5050733	5050781	5055076	5055364	6276	17,15	36,43	1,6	64,52	198	99	6.98324e-07	4.20251e-05	0.191,0.149	0.008,0.055	0.138
31908	ENSMUSG00000040263.16	Klhdc4	chr8	-	121821274	121821358	121821302	121821358	121820121	121820220	31908	62,44	6,4	118,79	33,18	127	99	0.00191919	0.0323737	0.89,0.896	0.736,0.774	0.138
2192	ENSMUSG00000042198.12	Chchd7	chr4	+	3938913	3939131	3938913	3938962	3939423	3939526	2192	139138	7,9	303330	51,50	198	99	8.71243e-05	0.00270497	0.908,0.885	0.748,0.767	0.139
3734	ENSMUSG00000069045.11	Ddx3y	chrY	-	1284317	1284354	1284321	1284354	1280309	1280439	3734	10,4	39,45	0,0	2,7	103	99	0.000775223	0.0159515	0.198,0.079	0.0,0.0	0.139
12096	ENSMUSG00000001211.15	Agpat3	chr10	-	78352032	78352489	78352212	78352489	78351626	78351711	12096	12,14	26,44	3,0	32,32	198	99	7.91995e-06	0.000353668	0.188,0.137	0.045,0.0	0.14
12940	ENSMUSG00000028990.13	Lzic	chr4	+	149485230	149485416	149485230	149485273	149485857	149485999	12940	14,15	48,34	6,2	147105	198	99	2.41425e-10	3.17313e-08	0.127,0.181	0.02,0.009	0.14
16682	ENSMUSG00000026479.13	Lamc2	chr1	-	153129662	153130150	153130035	153130150	153128956	153129156	16682	3,6	10,12	3,6	94,84	198	99	0.00069616	0.0145428	0.13,0.2	0.016,0.034	0.14
24376	ENSMUSG00000032966.14	Fkbp1a	chr2	+	151542817	151543198	151542817	151542865	151544012	151544140	24376	35,44	1,0	51,34	2,6	198	99	0.00100421	0.0196107	0.946,1.0	0.927,0.739	0.14
602	ENSMUSG00000037965.14	Zc3h7a	chr16	-	11145179	11145285	11145241	11145285	11141662	11141771	602	146145	13,0	269301	49,40	161	99	2.06538e-05	0.000804325	0.874,1.0	0.771,0.822	0.141
9385	ENSMUSG00000060147.15	Serpinb6a	chr13	-	33935572	33935770	33935766	33935770	33931471	33931646	9385	729582	25,19	399367	58,41	198	99	3.82124e-11	5.87987e-09	0.936,0.939	0.775,0.817	0.141
17968	ENSMUSG00000025982.13	Sf3b1	chr1	-	55016128	55016490	55016375	55016490	55014868	55014924	17968	101,80	2,2	239178	20,26	198	99	4.01209e-05	0.00141405	0.962,0.952	0.857,0.774	0.141
21667	ENSMUSG00000009995.17	Taz	chrX	+	74288303	74288714	74288303	74288513	74288928	74289019	21667	7,5	0,0	63,59	5,5	198	99	0.000960989	0.0189578	1.0,1.0	0.863,0.855	0.141
832	ENSMUSG00000040599.13	Mis12	chr11	+	71019610	71020189	71019610	71019723	71024549	71024711	832	78,59	3,1	271312	38,32	198	99	0.000168056	0.00460171	0.929,0.967	0.781,0.83	0.142
11259	ENSMUSG00000064030.15	Pym1	chr10	+	128765146	128765391	128765146	128765240	128765609	128766564	11259	58,38	91,66	48,61	261282	198	99	1.51281e-08	1.35184e-06	0.242,0.224	0.084,0.098	0.142
20972	ENSMUSG00000053581.13	Zfand2a	chr5	-	139484131	139484517	139484276	139484517	139482701	139482797	20972	59,37	52,54	61,67	157164	198	99	0.000326518	0.00787438	0.362,0.255	0.163,0.17	0.142
1729	ENSMUSG00000021557.15	Agtpbp1	chr13	-	59557097	59557286	59557222	59557286	59544386	59544451	1729	57,31	71,45	15,12	39,57	198	99	0.000175049	0.00475195	0.286,0.256	0.161,0.095	0.143
3346	ENSMUSG00000030852.17	Tacc2	chr7	+	130734948	130735228	130734948	130735150	130739811	130739873	3346	13,6	22,16	8,6	63,46	177	99	0.00116182	0.0217756	0.248,0.173	0.066,0.068	0.143
5636	ENSMUSG00000036820.12	Amdhd2	chr17	-	24157116	24157596	24157527	24157596	24156570	24156672	5636	35,39	106,87	14,7	261298	198	99	0	0	0.142,0.183	0.026,0.012	0.143
20945	ENSMUSG00000098090.8	2700099C18Rik	chr17	+	94763771	94763924	94763771	94763882	94766856	94766947	20945	8,6	0,0	60,67	6,9	141	99	0.000543934	0.0119401	1.0,1.0	0.875,0.839	0.143
21268	ENSMUSG00000024163.17	Mapk8ip3	chr17	-	24917994	24918139	24918087	24918139	24916503	24916629	21268	290276	1,2	104,83	12,6	192	99	5.83814e-09	5.57754e-07	0.993,0.986	0.817,0.877	0.143
28671	ENSMUSG00000032413.12	Rasa2	chr9	-	96552984	96553186	96553112	96553186	96552302	96552409	28671	4,3	7,17	1,1	51,69	198	99	0.000547596	0.0120121	0.222,0.081	0.01,0.007	0.143
31124	ENSMUSG00000038482.11	Tfdp1	chr8	+	13338820	13339146	13338820	13338920	13339664	13339739	31124	65,27	79,62	95,95	491448	198	99	2.11533e-07	1.42882e-05	0.291,0.179	0.088,0.096	0.143
32590	ENSMUSG00000036977.8	Anapc10	chr8	+	79711819	79712174	79711819	79711844	79713152	79713279	32590	10,4	14,17	11,8	122,99	198	99	0.000793736	0.0162793	0.263,0.105	0.043,0.039	0.143
33916	ENSMUSG00000031821.11	Gins2	chr8	-	120588728	120589034	120588925	120589034	120586092	120586192	33916	11,10	0,0	67,54	2,8	198	99	0.000787685	0.0161763	1.0,1.0	0.944,0.771	0.143
727	ENSMUSG00000060147.15	Serpinb6a	chr13	-	33935568	33935794	33935618	33935794	33931471	33931646	727	522422	70,44	292235	70,76	149	99	6.14207e-07	3.74026e-05	0.832,0.864	0.735,0.673	0.144
9456	ENSMUSG00000061878.15	Sphk1	chr11	+	116533250	116533665	116533250	116533368	116533969	116534318	9456	28,27	47,39	49,25	155189	198	99	9.71677e-06	0.000422548	0.23,0.257	0.136,0.062	0.144
18730	ENSMUSG00000026281.15	Dtymk	chr1	-	93800742	93800906	93800801	93800906	93798379	93798470	18730	57,49	102103	193154	1025917	158	99	5.80514e-10	6.93626e-08	0.259,0.23	0.106,0.095	0.144
1080	ENSMUSG00000024845.17	Tmem134	chr19	+	4127549	4127836	4127549	4127639	4131228	4131282	1080	388316	5,3	191238	19,24	198	99	5.35559e-11	7.93131e-09	0.975,0.981	0.834,0.832	0.145
1720	ENSMUSG00000026409.14	Pfkfb2	chr1	-	130714455	130714575	130714465	130714575	130708075	130708201	1720	10,5	30,25	6,4	84,96	109	99	0.000476646	0.0107897	0.232,0.154	0.061,0.036	0.145
10567	ENSMUSG00000024276.7	Zfp397	chr18	+	23954704	23955023	23954704	23954861	23956338	23956791	10567	78,58	8,4	278230	65,41	198	99	0.00262558	0.0415723	0.83,0.879	0.681,0.737	0.145
13015	ENSMUSG00000026988.15	Wdsub1	chr2	-	59882400	59882574	59882411	59882574	59878129	59878587	13015	24,7	0,1	16,11	5,2	110	99	0.0010882	0.0206659	1.0,0.863	0.742,0.832	0.145
15732	ENSMUSG00000029920.9	Smarcad1	chr6	+	65042620	65043104	65042620	65042730	65043205	65043561	15732	23,20	71,34	26,17	259303	198	99	1.12847e-09	1.26228e-07	0.139,0.227	0.048,0.027	0.145
1185	ENSMUSG00000028552.13	Eps15	chr4	+	109321127	109321325	109321127	109321217	109322069	109322215	1185	244172	121,91	102154	108129	198	99	0.000144585	0.00407943	0.502,0.486	0.321,0.374	0.146
18419	ENSMUSG00000021413.9	Prpf4b	chr13	+	34899200	34899455	34899200	34899223	34899830	34899982	18419	40,48	53,49	103,55	216207	198	99	4.1781e-05	0.0014579	0.274,0.329	0.193,0.117	0.146
27800	ENSMUSG00000044950.7	Pwwp2a	chr11	+	43705242	43705567	43705242	43705477	43720220	43721491	27800	8,13	22,22	8,5	58,66	189	99	0.000182152	0.00488589	0.16,0.236	0.067,0.038	0.146
15291	ENSMUSG00000062006.12	Rpl34	chr3	-	130729502	130729790	130729747	130729790	130729228	130729302	15291	235218	0,2	22,17	5,0	198	99	0.0025428	0.0404066	1.0,0.982	0.688,1.0	0.147
30719	ENSMUSG00000074182.8	Znhit6	chr3	+	145576335	145576772	145576335	145576359	145576850	145576996	30719	33,26	0,0	37,22	3,2	198	99	0.00281127	0.0438787	1.0,1.0	0.86,0.846	0.147
659	ENSMUSG00000021179.8	Nrde2	chr12	-	100151210	100151334	100151225	100151334	100149816	100150050	659	96,83	13,8	69,68	21,22	114	99	0.000718561	0.0149415	0.865,0.9	0.74,0.729	0.148
2353	ENSMUSG00000029439.14	Sfswap	chr5	+	129543213	129543379	129543213	129543295	129549453	129549684	2353	108,95	4,3	258176	18,41	183	99	0.00039948	0.00934918	0.936,0.945	0.886,0.699	0.148
11225	ENSMUSG00000025351.14	Cd63	chr10	+	128910403	128910812	128910403	128910775	128911451	128911640	11225	8,5	18,30	3,2	77,50	136	99	0.000242827	0.00614745	0.244,0.108	0.028,0.028	0.148
22640	ENSMUSG00000079109.11	Pms2	chr5	+	143909963	143910297	143909963	143910079	143911920	143912060	22640	10,11	30,24	14,4	264281	198	99	3.18239e-10	4.03153e-08	0.143,0.186	0.026,0.007	0.148
8821	ENSMUSG00000021235.13	Coq6	chr12	+	84370255	84370581	84370255	84370354	84370923	84371031	8821	70,66	3,2	113109	18,13	198	99	0.000687216	0.0143956	0.921,0.943	0.758,0.807	0.149
12471	ENSMUSG00000023235.14	Ccl25	chr8	+	4327756	4327893	4327756	4327850	4347792	4347913	12471	16,9	0,1	59,25	9,6	142	99	0.00114186	0.0214731	1.0,0.863	0.82,0.744	0.149
1564	ENSMUSG00000115149.1	9330188P03Rik	chr14	+	105592691	105593299	105592691	105592972	105593580	105593907	1564	7,6	0,0	34,34	3,3	198	99	0.00274481	0.0430972	1.0,1.0	0.85,0.85	0.15
4157	ENSMUSG00000025069.15	Gsto2	chr19	+	47870180	47870434	47870180	47870323	47871653	47871803	4157	6,3	15,7	0,1	11,11	198	99	0.000700511	0.0145951	0.167,0.176	0.0,0.043	0.15
4860	ENSMUSG00000102918.1	Pcdhgc3	chr18	+	37806409	37808977	37806409	37806577	37825020	37825079	4860	207224	7,3	113123	11,18	198	99	2.09789e-06	0.000111407	0.937,0.974	0.837,0.774	0.15
607	ENSMUSG00000021432.15	Slc35b3	chr13	-	38955648	38955936	38955820	38955936	38954108	38954230	607	92,77	6,4	721582	113109	198	99	0.00017544	0.00475436	0.885,0.906	0.761,0.727	0.151
2173	ENSMUSG00000028677.19	Rnf220	chr4	-	117285850	117285972	117285928	117285972	117285378	117285511	2173	175100	10,10	242231	56,44	177	99	1.93106e-05	0.000761417	0.907,0.848	0.707,0.746	0.151
2907	ENSMUSG00000030057.15	Cnbp	chr6	-	87845655	87845793	87845676	87845793	87845121	87845557	2907	26422274	504330	1036910006	40273881	120	99	4.77396e-15	1.28709e-12	0.812,0.85	0.68,0.68	0.151
16292	ENSMUSG00000030309.16	Caprin2	chr6	-	148876452	148876535	148876482	148876535	148873007	148873163	16292	11,12	0,0	36,30	5,4	129	99	0.000333083	0.00800212	1.0,1.0	0.847,0.852	0.151
7625	ENSMUSG00000021893.14	Capn7	chr14	+	31344441	31344603	31344441	31344599	31347657	31347858	7625	4,2	12,29	0,0	1,5	103	99	0.00201238	0.033551	0.243,0.062	0.0,0.0	0.152
15737	ENSMUSG00000109771.1	Gm35315	chr5	-	110080483	110080818	110080737	110080818	110076135	110079380	15737	14,6	0,0	87,81	7,8	198	99	0.000438188	0.0101039	1.0,1.0	0.861,0.835	0.152
21766	ENSMUSG00000044768.16	D1Ertd622e	chr1	-	97660730	97661676	97661432	97661676	97654599	97654689	21766	36,16	0,0	49,73	2,11	198	99	7.92362e-05	0.00249667	1.0,1.0	0.925,0.768	0.153
23611	ENSMUSG00000073791.11	Efcab7	chr4	+	99829439	99829554	99829439	99829535	99831389	99831580	23611	4,6	0,0	60,65	11,8	118	99	0.00048004	0.0108315	1.0,1.0	0.821,0.872	0.153
31444	ENSMUSG00000036989.16	Trim3	chr7	-	105619382	105619614	105619387	105619614	105619069	105619210	31444	83,72	14,7	100,90	36,33	104	99	0.000212665	0.00552579	0.849,0.907	0.726,0.722	0.154
9928	ENSMUSG00000091228.1	Gm20390	chr11	-	93967960	93968293	93968243	93968293	93965807	93965937	9928	6,35	0,0	110,99	8,11	198	99	0.000104659	0.00316527	1.0,1.0	0.873,0.818	0.155
26233	ENSMUSG00000090733.6	Rps27	chr3	-	90213380	90213623	90213566	90213623	90213192	90213301	26233	207138	5,5	93,86	20,6	198	99	0.000124383	0.00363628	0.954,0.932	0.699,0.878	0.155
33060	ENSMUSG00000033781.7	Asb13	chr13	+	3634098	3634453	3634098	3634175	3642064	3642825	33060	9,9	22,16	14,6	125109	198	99	3.1826e-05	0.00116329	0.17,0.22	0.053,0.027	0.155
1788	ENSMUSG00000026107.11	Nabp1	chr1	-	51477824	51478399	51478300	51478399	51477477	51477616	1788	159175	2,2	401429	44,47	198	99	5.37951e-10	6.47677e-08	0.975,0.978	0.82,0.82	0.156
5072	ENSMUSG00000036368.8	Rmdn2	chr17	+	79667950	79668028	79667950	79668015	79670556	79670655	5072	12,15	0,0	38,34	3,9	112	99	0.000160796	0.00445317	1.0,1.0	0.918,0.77	0.156
11210	ENSMUSG00000025351.14	Cd63	chr10	+	128909344	128909522	128909344	128909511	128910394	128910471	11210	8,12	1,0	20,12	5,3	110	99	0.00177824	0.0304705	0.878,1.0	0.783,0.783	0.156
20073	ENSMUSG00000055436.18	Srsf11	chr3	-	158031756	158032066	158031990	158032066	158031451	158031648	20073	14,6	0,0	40,27	3,3	198	99	0.00234306	0.0378247	1.0,1.0	0.87,0.818	0.156
1091	ENSMUSG00000109378.1	Gm49396	chr7	+	30564202	30564394	30564202	30564301	30564473	30564607	1091	69,53	78104	85,65	312361	192	99	5.49344e-08	4.38696e-06	0.313,0.208	0.123,0.085	0.157
1392	ENSMUSG00000026641.13	Usf1	chr1	+	171415714	171415830	171415714	171415799	171416134	171416236	1392	770659	69,56	10251090	286278	130	99	1.9984e-15	5.57855e-13	0.895,0.9	0.732,0.749	0.157
19258	ENSMUSG00000044037.15	Als2cl	chr9	+	110880173	110880500	110880173	110880229	110882713	110882823	19258	32,27	35,41	35,18	98,84	198	99	0.000106609	0.00320973	0.314,0.248	0.152,0.097	0.157
6101	ENSMUSG00000021018.8	Polr2h	chr16	+	20718823	20719089	20718823	20718907	20720518	20720602	6101	43,33	0,0	110,94	8,11	198	99	1.43839e-05	0.000589256	1.0,1.0	0.873,0.81	0.158
26278	ENSMUSG00000039069.19	Mtg2	chr2	+	180084450	180084589	180084450	180084582	180085379	180085902	26278	34,31	2,0	111169	25,35	106	99	1.3862e-05	0.000573085	0.941,1.0	0.806,0.819	0.158
28518	ENSMUSG00000021428.9	Riok1	chr13	+	38043908	38045315	38043908	38043978	38047244	38047350	28518	46,62	1,0	140183	13,23	198	99	2.96816e-06	0.000151256	0.958,1.0	0.843,0.799	0.158
29684	ENSMUSG00000056952.13	Tatdn2	chr6	+	113709459	113709919	113709459	113709643	113710040	113710449	29684	211196	237197	110125	305303	198	99	4.70705e-10	5.73279e-08	0.308,0.332	0.153,0.171	0.158
31288	ENSMUSG00000032737.13	Inppl1	chr7	-	101826520	101826841	101826753	101826841	101826192	101826271	31288	25,13	0,0	26,20	6,0	198	99	0.000698605	0.0145842	1.0,1.0	0.684,1.0	0.158
9384	ENSMUSG00000060147.15	Serpinb6a	chr13	-	33935568	33935770	33935766	33935770	33931471	33931646	9384	706609	25,19	380311	58,41	198	99	1.03029e-12	2.13812e-10	0.934,0.941	0.766,0.791	0.159
16420	ENSMUSG00000027995.10	Tlr2	chr3	-	83840888	83841136	83841023	83841136	83836271	83838789	16420	1,4	0,0	28,35	1,6	198	99	0.000668629	0.0141079	1.0,1.0	0.933,0.745	0.161
1150	ENSMUSG00000031885.14	Cbfb	chr8	+	105202451	105202578	105202451	105202547	105215903	105217981	1150	795681	130130	706762	297306	130	99	5.24928e-11	7.84755e-09	0.823,0.8	0.644,0.655	0.162
8579	ENSMUSG00000021260.8	Hhipl1	chr12	+	108311687	108312334	108311687	108312074	108316450	108316594	8579	18,21	0,0	30,25	5,1	198	99	0.000369205	0.00876314	1.0,1.0	0.75,0.926	0.162
878	ENSMUSG00000020514.8	Mrpl22	chr11	+	58171793	58172021	58171793	58171842	58173032	58173150	878	114122	236216	122,87	11321112	198	99	0	0	0.195,0.22	0.051,0.038	0.163
7694	ENSMUSG00000055839.6	Elob	chr17	-	23828643	23828924	23828746	23828924	23827467	23827573	7694	31,29	1,0	45,31	5,4	198	99	0.00060002	0.0129019	0.939,1.0	0.818,0.795	0.163
8172	ENSMUSG00000035139.14	Secisbp2	chr13	+	51678833	51678994	51678833	51678990	51679732	51679953	8172	9,3	29,27	0,0	40,36	103	99	4.12985e-06	0.000204509	0.23,0.096	0.0,0.0	0.163
24677	ENSMUSG00000028047.11	Thbs3	chr3	+	89219054	89219264	89219054	89219257	89219388	89219537	24677	83112	11,5	54,36	22,8	106	99	0.000105904	0.00319984	0.876,0.954	0.696,0.808	0.163
30073	ENSMUSG00000021661.16	Ankra2	chr13	+	98266150	98266545	98266150	98266510	98267315	98267474	30073	7,5	0,0	20,15	1,4	134	99	0.00309963	0.0473256	1.0,1.0	0.937,0.735	0.164
2174	ENSMUSG00000028677.19	Rnf220	chr4	-	117288362	117289068	117289025	117289068	117285850	117285972	2174	26,26	62,39	12,9	110109	198	99	5.67486e-09	5.45755e-07	0.173,0.25	0.052,0.04	0.165
7692	ENSMUSG00000055839.6	Elob	chr17	-	23828581	23828924	23828746	23828924	23827467	23827573	7692	31,29	1,0	47,29	5,4	198	99	0.000602976	0.0129478	0.939,1.0	0.825,0.784	0.165
9454	ENSMUSG00000020806.15	Rhbdf2	chr11	-	116604377	116604506	116604382	116604506	116603931	116604050	9454	60,41	0,3	31,36	8,8	104	99	3.8672e-05	0.00137373	1.0,0.929	0.787,0.811	0.165
19065	ENSMUSG00000040852.6	Plekhh2	chr17	+	84565970	84566935	84565970	84566102	84569875	84569951	19065	13,30	0,0	40,31	4,3	198	99	0.000575254	0.0124799	1.0,1.0	0.833,0.838	0.165
578	ENSMUSG00000057440.8	Mpp7	chr18	-	7626728	7626817	7626732	7626817	7561725	7561872	578	26,34	4,4	78,75	28,32	103	99	0.00181745	0.0310058	0.862,0.891	0.728,0.693	0.166
9386	ENSMUSG00000060147.15	Serpinb6a	chr13	-	33935618	33935770	33935766	33935770	33931471	33931646	9386	535429	25,19	317274	58,41	198	99	2.5171e-10	3.29458e-08	0.915,0.919	0.732,0.77	0.166
18731	ENSMUSG00000026281.15	Dtymk	chr1	-	93800775	93800906	93800801	93800906	93798379	93798470	18731	57,48	102103	190153	1025917	125	99	5.56197e-10	6.67098e-08	0.307,0.27	0.128,0.117	0.166
24009	ENSMUSG00000026755.14	Arpc5l	chr2	+	39008156	39008570	39008156	39008324	39013116	39013187	24009	75,91	5,8	205202	46,41	198	99	0.000388338	0.0091416	0.882,0.85	0.69,0.711	0.166
1113	ENSMUSG00000040687.16	Madd	chr2	-	91166913	91167163	91167042	91167163	91166545	91166685	1113	18,11	0,0	40,31	2,5	198	99	0.000466659	0.0105969	1.0,1.0	0.909,0.756	0.167
1327	ENSMUSG00000028689.14	Ccdc163	chr4	+	116710100	116710284	116710100	116710280	116711285	116711378	1327	7,7	0,0	25,12	2,4	103	99	0.00102792	0.0199536	1.0,1.0	0.923,0.742	0.167
8121	ENSMUSG00000074886.11	Grk6	chr13	+	55451519	55451836	55451519	55451832	55452134	55452325	8121	2,2	0,0	19,17	4,3	103	99	0.00119335	0.0222378	1.0,1.0	0.82,0.845	0.167
10353	ENSMUSG00000040599.13	Mis12	chr11	+	71019610	71020038	71019610	71019976	71024549	71024711	10353	7,10	0,0	18,22	4,1	161	99	0.0025558	0.0405739	1.0,1.0	0.735,0.931	0.167
25391	ENSMUSG00000023330.12	Dtwd1	chr2	+	126152140	126152577	126152140	126152400	126154545	126154860	25391	1,1	0,0	43,37	3,5	198	99	0.00105212	0.0201384	1.0,1.0	0.878,0.787	0.167
17296	ENSMUSG00000040390.13	Map3k10	chr7	-	27661381	27661651	27661534	27661651	27659020	27659174	17296	7,3	11,10	0,2	20,30	198	99	8.66753e-05	0.00269368	0.241,0.13	0.0,0.032	0.169
497	ENSMUSG00000040701.16	Ap1g2	chr14	-	55104581	55104927	55104830	55104927	55104362	55104458	497	73,78	0,2	73,81	19,2	198	99	0.000167196	0.00458214	1.0,0.951	0.658,0.953	0.17
18906	ENSMUSG00000079658.9	Eloc	chr1	-	16656861	16657018	16656911	16657018	16647954	16648007	18906	70,60	73,52	94,81	185179	149	99	2.7616e-05	0.00104451	0.389,0.434	0.252,0.231	0.17
28825	ENSMUSG00000066621.12	Tecpr1	chr5	-	144217225	144217408	144217268	144217408	144216902	144217025	28825	130163	0,0	71108	15,9	142	99	1.86767e-10	2.53939e-08	1.0,1.0	0.767,0.893	0.17
2386	ENSMUSG00000061136.14	Prpf40a	chr2	-	53191022	53191250	53191148	53191250	53189968	53190100	2386	999843	228184	540646	263283	198	99	6.15933e-09	5.83453e-07	0.687,0.696	0.507,0.533	0.171
12275	ENSMUSG00000029334.14	Prkg2	chr5	-	98971851	98972005	98971874	98972005	98969936	98970073	12275	23,29	0,2	33,40	6,10	122	99	0.000487446	0.010975	1.0,0.922	0.817,0.764	0.171
34984	ENSMUSG00000070284.10	Gmppb	chr9	+	108049324	108049420	108049324	108049394	108049511	108049645	34984	4,6	0,0	26,15	1,5	125	99	0.000751585	0.0155259	1.0,1.0	0.954,0.704	0.171
14866	ENSMUSG00000052137.11	Rbm12b2	chr4	+	12089440	12089568	12089440	12089523	12089662	12089727	14866	18,14	34,48	4,5	77,57	144	99	2.82218e-06	0.000144822	0.267,0.167	0.034,0.057	0.172
23447	ENSMUSG00000054766.13	Set	chr2	+	30067192	30067726	30067192	30067204	30068268	30068326	23447	7,11	1,0	13,30	3,5	198	99	0.00300301	0.0461857	0.778,1.0	0.684,0.75	0.172
33040	ENSMUSG00000031808.7	Slc27a1	chr8	+	71584482	71584841	71584482	71584770	71585345	71585492	33040	20,16	1,0	74,48	7,11	170	99	0.000507151	0.0113137	0.921,1.0	0.86,0.718	0.172
9387	ENSMUSG00000060147.15	Serpinb6a	chr13	-	33935626	33935770	33935766	33935770	33931471	33931646	9387	544465	25,19	311268	58,41	198	99	2.85203e-11	4.61356e-09	0.916,0.924	0.728,0.766	0.173
19110	ENSMUSG00000026718.17	Stam	chr2	+	14115816	14116052	14115816	14115892	14117388	14117535	19110	3,4	6,8	0,1	6,9	198	99	0.00182992	0.0311847	0.2,0.2	0.0,0.053	0.174
24659	ENSMUSG00000027122.15	Arl14ep	chr2	-	106974271	106974424	106974301	106974424	106969071	106969558	24659	136122	29,28	163179	74101	129	99	1.49896e-05	0.000611686	0.783,0.77	0.628,0.576	0.174
15048	ENSMUSG00000028256.16	Odf2l	chr3	+	145118588	145118928	145118588	145118782	145124210	145124375	15048	8,10	12,27	5,1	48,77	198	99	1.62465e-06	8.86641e-05	0.25,0.156	0.05,0.006	0.175
25393	ENSMUSG00000023330.12	Dtwd1	chr2	+	126152140	126152577	126152140	126152508	126154545	126154860	25393	1,1	0,0	43,37	5,5	168	99	0.000932668	0.0185032	1.0,1.0	0.835,0.813	0.176
1235	ENSMUSG00000039137.18	Whrn	chr4	-	63435347	63435562	63435359	63435562	63434109	63434146	1235	12,16	45,39	6,3	80,60	111	99	1.31619e-05	0.000545572	0.192,0.268	0.063,0.043	0.177
31661	ENSMUSG00000032002.10	Dcun1d5	chr9	+	7206072	7206334	7206072	7206222	7206719	7208205	31661	19,2	16,20	2,4	47,48	198	99	0.000574827	0.0124792	0.373,0.048	0.021,0.04	0.18
1678	ENSMUSG00000043019.12	Edem3	chr1	+	151805849	151806003	151805849	151805946	151807365	151807557	1678	118,97	3,1	59,64	8,13	156	99	8.26547e-07	4.82826e-05	0.961,0.984	0.824,0.758	0.181
11925	ENSMUSG00000035478.14	Mbd3	chr10	-	80398970	80399422	80399217	80399422	80395435	80395595	11925	307264	378335	149114	529604	198	99	0	0	0.289,0.283	0.123,0.086	0.181
244	ENSMUSG00000041130.10	Zfp598	chr17	+	24678595	24678713	24678595	24678704	24679036	24679224	244	80,69	31,25	53,56	51,39	108	99	0.000862852	0.0173805	0.703,0.717	0.488,0.568	0.182
435	ENSMUSG00000022338.8	Eny2	chr15	+	44428091	44428242	44428091	44428170	44429559	44429636	435	771676	177127	30482556	14071212	171	99	1.58598e-11	2.6753e-09	0.716,0.755	0.556,0.55	0.182
31986	ENSMUSG00000040167.16	Ikzf5	chr7	-	131410197	131410405	131410386	131410405	131408930	131409078	31986	18,13	0,0	22,18	4,1	198	99	0.00131446	0.0239395	1.0,1.0	0.733,0.9	0.183
15183	ENSMUSG00000078578.9	Ube2d3	chr3	+	135438315	135438769	135438315	135438432	135439643	135439798	15183	68,47	109,83	14,19	179170	198	99	1.11022e-16	3.50209e-14	0.238,0.221	0.038,0.053	0.184
18215	ENSMUSG00000033964.12	Zbtb41	chr1	+	139422287	139422326	139422287	139422317	139423033	139424267	18215	44,52	5,0	89,65	33,14	108	99	1.25063e-05	0.000523903	0.89,1.0	0.712,0.81	0.184
6944	ENSMUSG00000115009.1	G930009F23Rik	chr15	-	38454671	38454815	38454770	38454815	38453158	38453403	6944	61,57	101,78	59,41	360356	198	99	1.11022e-16	3.50209e-14	0.232,0.268	0.076,0.054	0.185
8552	ENSMUSG00000037957.14	Wdr20	chr12	+	110737943	110738277	110737943	110738092	110779295	110779478	8552	82,62	1,0	127103	9,19	198	99	5.80038e-07	3.58057e-05	0.976,1.0	0.876,0.73	0.185
14936	ENSMUSG00000038034.15	Igsf8	chr1	+	172316127	172316582	172316127	172316236	172317354	172317816	14936	93,89	2,0	32,28	2,6	198	99	0.000168331	0.00460523	0.959,1.0	0.889,0.7	0.185
30193	ENSMUSG00000062040.14	Zfp27	chr7	-	29903899	29904059	29903904	29904059	29900237	29900338	30193	18,9	0,0	87,79	19,17	104	99	1.23009e-05	0.000515984	1.0,1.0	0.813,0.816	0.185
15184	ENSMUSG00000078578.9	Ube2d3	chr3	+	135438315	135438774	135438315	135438432	135439643	135439798	15184	69,47	109,83	13,19	179170	198	99	0	0	0.24,0.221	0.035,0.053	0.186
17407	ENSMUSG00000026743.16	Mllt10	chr2	+	18065034	18065426	18065034	18065194	18071124	18071204	17407	61,54	80,94	17,12	109104	198	99	1.27828e-11	2.19141e-09	0.276,0.223	0.072,0.055	0.186
439	ENSMUSG00000024943.9	Smc5	chr19	-	23214641	23214740	23214644	23214740	23214065	23214170	439	187176	161153	73,77	139141	102	99	1.51389e-06	8.30971e-05	0.53,0.528	0.338,0.346	0.187
1218	ENSMUSG00000040785.19	Ttc3	chr16	+	94370766	94370971	94370766	94370861	94383911	94384066	1218	244232	107102	124121	101135	198	99	1.33088e-06	7.45671e-05	0.533,0.532	0.38,0.309	0.188
[truncated: 493 more rows]

## Sheet: MXE
		ID	GeneID	geneSymbol	chr	strand	X1stExonStart_0base	X1stExonEnd	X2ndExonStart_0base	X2ndExonEnd	upstreamES	upstreamEE	downstreamES	downstreamEE	ID.1	IJC_SAMPLE_1	SJC_SAMPLE_1	IJC_SAMPLE_2	SJC_SAMPLE_2	IncFormLen	SkipFormLen	PValue	FDR	IncLevel1	IncLevel2	IncLevelDifference
[truncated: 1,449 more rows]

[truncated: 2 more sheets: RI, SE]
