# Supplementary material for: The context-dependent epigenetic and organogenesis programs determine 3D vs. 2D cellular fitness of MYC-driven murine liver cancer cells
Source: eLife. 2025 May 6;14:RP101299. doi: 10.7554/eLife.101299 (PMC12055005; doi:10.7554/eLife.101299)
Supplement: Supplementary file 5. [file elife-101299-supp5.xlsx]

## Sheet: A3SS
ID	GeneID	geneSymbol	chr	strand	longExonStart_0base	longExonEnd	shortES	shortEE	flankingES	flankingEE	ID.1	IJC_SAMPLE_1	SJC_SAMPLE_1	IJC_SAMPLE_2	SJC_SAMPLE_2	IncFormLen	SkipFormLen	PValue	FDR	IncLevel1	IncLevel2	IncLevelDifference
4	ENSMUSG00000031342.17	Gpm6b	chrX	+	166385390	166388988	166386951	166388988	166383934	166384000	4	164218	92112	38,48	61,51	198	99	8.94572e-06	0.000862941	0.471,0.493	0.237,0.32	0.204
31	ENSMUSG00000034160.13	Ogt	chrX	+	101642975	101643156	101643005	101643156	101640217	101640322	31	566811	155211	225189	28,30	129	99	0.000202347	0.011376	0.737,0.747	0.86,0.829	-0.103
50	ENSMUSG00000000838.17	Fmr1	chrX	+	68712230	68712413	68712305	68712413	68710583	68710779	50	331513	61,88	241263	12,27	174	99	4.54235e-05	0.00344318	0.755,0.768	0.92,0.847	-0.122
193	ENSMUSG00000025420.13	Katnal2	chr18	-	76978429	76978672	76978429	76978532	76979998	76980161	193	0,1	11,10	5,4	4,7	198	99	5.81211e-05	0.00425106	0.0,0.048	0.385,0.222	-0.279
264	ENSMUSG00000061950.17	Ppp4r1	chr17	+	65803159	65803295	65803210	65803295	65783623	65783668	264	133160	184257	123,95	111,82	150	99	0.00096606	0.0367499	0.323,0.291	0.422,0.433	-0.12
351	ENSMUSG00000062753.14	AI413582	chr17	-	27564148	27564339	27564148	27564254	27564561	27564750	351	11,18	4,7	37,36	3,2	184	99	0.0013869	0.0481841	0.597,0.58	0.869,0.906	-0.299
353	ENSMUSG00000062753.14	AI413582	chr17	-	27564148	27564410	27564148	27564339	27564561	27564750	353	138209	1,1	162125	11,12	170	99	1.58719e-07	2.90462e-05	0.988,0.992	0.896,0.858	0.113
367	ENSMUSG00000004865.16	Srpk1	chr17	-	28599470	28600456	28599470	28599869	28602687	28602853	367	34,65	13,17	15,17	23,23	198	99	1.16656e-06	0.000157681	0.567,0.657	0.246,0.27	0.354
463	ENSMUSG00000071533.11	Pcnp	chr16	-	56024223	56024438	56024223	56024386	56029602	56029696	463	429518	181233	366306	102,83	151	99	0.0011146	0.0411053	0.608,0.593	0.702,0.707	-0.104
468	ENSMUSG00000002372.9	Ranbp3	chr17	+	56701022	56702890	56702762	56702890	56696717	56696789	468	595842	9,12	253289	76,90	198	99	0	0	0.971,0.972	0.625,0.616	0.351
493	ENSMUSG00000022855.9	Senp2	chr16	+	22035532	22036646	22036469	22036646	22032103	22032164	493	10,26	220288	27,22	63,40	198	99	6.46927e-13	3.34521e-10	0.022,0.043	0.176,0.216	-0.164
519	ENSMUSG00000003527.9	Ess2	chr16	-	17907749	17907922	17907749	17907919	17909904	17910000	519	125198	52,82	70,48	80,43	102	99	1.96993e-06	0.000247861	0.7,0.701	0.459,0.52	0.211
553	ENSMUSG00000023007.15	Prpf40b	chr15	+	99315111	99315286	99315190	99315286	99314842	99314980	553	20,30	46,64	13,10	77,51	178	99	0.00122027	0.0439039	0.195,0.207	0.086,0.098	0.109
578	ENSMUSG00000053137.7	Mapk11	chr15	-	89145095	89145232	89145095	89145175	89145374	89145446	578	9,18	35,83	1,0	32,34	156	99	2.93355e-06	0.000339726	0.14,0.121	0.019,0.0	0.121
582	ENSMUSG00000022387.17	Brd1	chr15	-	88700772	88701270	88700772	88700877	88707033	88707294	582	206317	52,88	245208	19,14	198	99	7.04946e-10	2.13258e-07	0.665,0.643	0.866,0.881	-0.219
589	ENSMUSG00000022897.15	Dyrk1a	chr16	+	94663741	94663861	94663768	94663861	94659496	94659693	589	151237	116175	238200	66,45	126	99	1.83521e-11	7.69922e-09	0.506,0.516	0.739,0.777	-0.247
602	ENSMUSG00000053411.16	Cbx7	chr15	-	79918752	79919104	79918752	79918927	79921371	79921438	602	7,8	0,6	1,5	0,0	198	99	0.00109761	0.0406754	1.0,0.4	1.0,1.0	-0.3
609	ENSMUSG00000033565.18	Rbfox2	chr15	-	77097939	77098084	77097939	77098072	77099239	77099332	609	306505	317535	101,83	252230	111	99	5.07616e-11	1.99767e-08	0.463,0.457	0.263,0.243	0.207
639	ENSMUSG00000072501.5	Phf20l1	chr15	+	66604776	66604905	66604779	66604905	66604026	66604240	639	79122	138223	20,22	91105	102	99	2.89767e-06	0.000336447	0.357,0.347	0.176,0.169	0.179
646	ENSMUSG00000022570.7	Tsta3	chr15	-	75926966	75927123	75926966	75927095	75928891	75929049	646	24,21	1,0	24,10	3,6	127	99	0.000151117	0.00898145	0.949,1.0	0.862,0.565	0.261
647	ENSMUSG00000022570.7	Tsta3	chr15	-	75926966	75927198	75926966	75927095	75928891	75929049	647	35,35	1,0	34,23	3,6	198	99	0.000135741	0.00820165	0.946,1.0	0.85,0.657	0.219
703	ENSMUSG00000022098.10	Bmp1	chr14	-	70486146	70486930	70486146	70486272	70490019	70490200	703	429585	340540	218195	395322	198	99	2.55129e-08	5.56155e-06	0.387,0.351	0.216,0.232	0.145
707	ENSMUSG00000034327.17	Kctd9	chr14	+	67729223	67729409	67729350	67729409	67728649	67728746	707	41,34	123170	45,50	32,28	198	99	1.11022e-15	7.96316e-13	0.143,0.091	0.413,0.472	-0.326
754	ENSMUSG00000004562.16	Arhgef40	chr14	+	52004878	52005035	52004988	52005035	52004611	52004742	754	81116	191296	78,74	39,37	198	99	0	0	0.175,0.164	0.5,0.5	-0.331
755	ENSMUSG00000004562.16	Arhgef40	chr14	+	52005158	52005623	52005340	52005623	52004988	52005035	755	175251	146237	31,28	74,72	198	99	6.83562e-08	1.34411e-05	0.375,0.346	0.173,0.163	0.193
831	ENSMUSG00000046169.10	Adamts6	chr13	+	104313630	104313719	104313635	104313719	104312714	104312926	831	43,84	50,93	19,16	52,40	104	99	0.000504726	0.0228566	0.45,0.462	0.258,0.276	0.189
892	ENSMUSG00000034928.16	Rnf44	chr13	-	54683960	54684150	54683960	54684086	54684337	54684488	892	59,98	95173	79,54	69,41	163	99	0.000161565	0.0094537	0.274,0.256	0.41,0.444	-0.162
958	ENSMUSG00000072825.11	Cep170b	chr12	+	112740773	112741011	112740878	112741011	112737838	112739509	958	480684	43,71	312234	10,1	198	99	6.80612e-09	1.6722e-06	0.848,0.828	0.94,0.992	-0.128
999	ENSMUSG00000079036.10	Alkbh1	chr12	-	87431399	87431593	87431399	87431538	87434118	87434209	999	154252	22,82	225177	6,5	154	99	4.65331e-11	1.84761e-08	0.818,0.664	0.96,0.958	-0.218
1021	ENSMUSG00000091803.7	Cox16	chr12	-	81472092	81472351	81472092	81472171	81474586	81474649	1021	419549	76,90	567475	60,35	198	99	0.000118126	0.00741746	0.734,0.753	0.825,0.872	-0.105
1051	ENSMUSG00000041297.8	Cdk13	chr13	-	17719355	17719805	17719355	17719625	17721087	17721293	1051	283425	163227	172143	41,29	198	99	1.01134e-07	1.88968e-05	0.465,0.484	0.677,0.711	-0.219
1099	ENSMUSG00000020608.7	Smc6	chr12	+	11297102	11297285	11297149	11297285	11294922	11295083	1099	2,14	259361	33,47	164144	146	99	0	0	0.005,0.026	0.12,0.181	-0.135
1121	ENSMUSG00000025144.17	Cenpx	chr11	-	120711702	120711895	120711702	120711756	120713692	120713738	1121	99104	2,4	29,17	12,10	198	99	1.59136e-10	5.40213e-08	0.961,0.929	0.547,0.459	0.442
1161	ENSMUSG00000020747.17	Tmem94	chr11	+	115790966	115791176	115791032	115791176	115790169	115790334	1161	156213	38,39	233146	10,20	165	99	0.000246665	0.0133283	0.711,0.766	0.933,0.814	-0.135
1227	ENSMUSG00000001441.13	Npepps	chr11	-	97236064	97236221	97236064	97236169	97240928	97241043	1227	16,21	7,0	22,10	0,0	151	99	0.000602879	0.0260039	0.6,1.0	1.0,1.0	-0.2
1234	ENSMUSG00000018669.14	Cdk5rap3	chr11	-	96912216	96912436	96912216	96912395	96913381	96913482	1234	11,12	5,5	8,14	1,0	140	99	0.000112437	0.00715318	0.609,0.629	0.85,1.0	-0.306
1285	ENSMUSG00000006288.8	Ttc5	chr14	-	50775290	50775450	50775290	50775382	50777261	50777412	1285	5,14	173292	9,14	61,40	167	99	2.22782e-06	0.000270686	0.017,0.028	0.08,0.172	-0.104
1303	ENSMUSG00000040667.11	Nup88	chr11	-	70944844	70944985	70944844	70944970	70945202	70945361	1303	139230	311423	43,56	237210	114	99	3.23727e-07	5.3319e-05	0.28,0.321	0.136,0.188	0.138
1307	ENSMUSG00000040712.16	Camta2	chr11	-	70683278	70683365	70683278	70683350	70683889	70684025	1307	0,0	15,20	9,3	9,9	114	99	4.62657e-07	7.16877e-05	0.0,0.0	0.465,0.224	-0.345
1308	ENSMUSG00000040712.16	Camta2	chr11	-	70683278	70683417	70683278	70683350	70683889	70684025	1308	0,0	15,20	7,4	9,9	166	99	9.31745e-07	0.00012908	0.0,0.0	0.317,0.21	-0.264
1318	ENSMUSG00000020886.17	Dlg4	chr11	+	70030594	70030654	70030603	70030654	70030398	70030452	1318	85148	16,17	149130	80,57	108	99	2.1829e-08	4.87806e-06	0.83,0.889	0.631,0.676	0.206
1351	ENSMUSG00000001034.17	Mapk7	chr11	-	61492903	61493185	61492903	61493069	61493646	61494266	1351	16,21	66102	18,19	35,23	198	99	0.000532941	0.0239151	0.108,0.093	0.205,0.292	-0.148
1356	ENSMUSG00000032633.12	Flcn	chr11	-	59795140	59795575	59795140	59795264	59795749	59795863	1356	71,77	180274	157136	44,18	198	99	0	0	0.165,0.123	0.641,0.791	-0.572
1382	ENSMUSG00000020364.14	Zfp354a	chr11	+	51061399	51061498	51061402	51061498	51060859	51060986	1382	5,7	13,24	1,0	11,3	102	99	0.000933839	0.0358927	0.272,0.221	0.081,0.0	0.206
1399	ENSMUSG00000006169.19	Clint1	chr11	+	45907839	45908044	45907893	45908044	45906180	45906467	1399	152278	511763	271256	369277	153	99	2.4506e-12	1.18454e-09	0.161,0.191	0.322,0.374	-0.172
1459	ENSMUSG00000040054.16	Baz2a	chr10	+	128096379	128096523	128096438	128096523	128091634	128091776	1459	3,10	4,3	14,4	0,0	158	99	2.03499e-06	0.000253491	0.32,0.676	1.0,1.0	-0.502
1465	ENSMUSG00000036916.13	Zfp280c	chrX	-	48578379	48578556	48578379	48578529	48591672	48591761	1465	27,22	3,1	31,20	18,12	126	99	1.1074e-05	0.00103895	0.876,0.945	0.575,0.567	0.34
1471	ENSMUSG00000042258.13	Isl1	chr13	-	116301610	116301778	116301610	116301709	116303045	116303332	1471	20,25	4,3	7,1	0,0	168	99	0.000333246	0.0167641	0.747,0.831	1.0,1.0	-0.211
1500	ENSMUSG00000005682.9	Pan2	chr10	+	128318162	128319038	128318944	128319038	128317889	128318033	1500	108211	3,7	94,46	10,13	198	99	5.34912e-05	0.00395142	0.947,0.938	0.825,0.639	0.21
1533	ENSMUSG00000035529.10	Prdm4	chr10	-	85904130	85904270	85904130	85904249	85905348	85905498	1533	65,77	151217	18,11	83,85	120	99	0.00033965	0.0170093	0.262,0.226	0.152,0.096	0.12
1565	ENSMUSG00000020167.14	Tcf3	chr10	-	80415364	80415523	80415364	80415520	80415852	80415926	1565	324567	389604	110119	206193	102	99	0.00144233	0.0496901	0.447,0.477	0.341,0.374	0.104
1568	ENSMUSG00000020167.14	Tcf3	chr10	-	80418765	80418818	80418765	80418815	80420020	80420088	1568	5,11	0,0	9,5	6,4	102	99	1.63054e-06	0.0002114	1.0,1.0	0.593,0.548	0.429
1571	ENSMUSG00000035478.14	Mbd3	chr10	-	80395063	80395285	80395063	80395201	80395435	80395595	1571	360492	8321161	684641	489511	183	99	0	0	0.19,0.186	0.431,0.404	-0.229
1594	ENSMUSG00000042570.14	Mier2	chr10	-	79549536	79549853	79549536	79549679	79550315	79550406	1594	30,48	100188	42,43	52,63	198	99	3.95821e-06	0.000437865	0.13,0.113	0.288,0.254	-0.15
1623	ENSMUSG00000029500.16	Pgam5	chr5	-	110265511	110265645	110265511	110265642	110265739	110265828	1623	414672	439665	209214	338317	102	99	0.000919963	0.0356122	0.478,0.495	0.375,0.396	0.101
1636	ENSMUSG00000039994.15	Timeless	chr10	+	128250284	128250462	128250287	128250462	128249967	128250110	1636	110147	36,46	70,43	46,41	102	99	8.61332e-05	0.00579477	0.748,0.756	0.596,0.504	0.202
1691	ENSMUSG00000029207.16	Apbb2	chr5	-	66399621	66400284	66399621	66400281	66451467	66452283	1691	139161	207296	22,29	80,87	102	99	0.000449822	0.0209024	0.395,0.346	0.211,0.244	0.143
1732	ENSMUSG00000029145.12	Eif2b4	chr5	-	31192581	31192770	31192581	31192625	31192992	31193139	1732	64,80	170210	77,74	114,85	198	99	7.85174e-05	0.00539671	0.158,0.16	0.252,0.303	-0.118
1774	ENSMUSG00000042508.16	Dmtf1	chr5	-	9130367	9130652	9130367	9130477	9131275	9131308	1774	28,44	240373	67,36	133113	198	99	1.74511e-10	5.87918e-08	0.055,0.056	0.201,0.137	-0.114
1775	ENSMUSG00000042508.16	Dmtf1	chr5	-	9130367	9130693	9130367	9130477	9131275	9131308	1775	22,25	240373	58,33	133113	198	99	2.82552e-13	1.59052e-10	0.044,0.032	0.179,0.127	-0.115
1804	ENSMUSG00000004040.16	Stat3	chr11	-	100889477	100889590	100889477	100889540	100889885	100889928	1804	6601013	31,71	314238	41,47	149	99	1.68776e-07	3.06345e-05	0.934,0.905	0.836,0.771	0.116
1812	ENSMUSG00000063077.14	Kif1b	chr4	-	149257869	149258081	149257869	149258003	149262135	149262278	1812	11,19	155250	47,30	80,65	177	99	5.55112e-16	4.18404e-13	0.038,0.041	0.247,0.205	-0.186
1813	ENSMUSG00000028975.16	Pex14	chr4	-	148967523	148970635	148967523	148967626	148984036	148984165	1813	295401	1,3	204187	21,23	198	99	2.55351e-15	1.72053e-12	0.993,0.985	0.829,0.803	0.173
1814	ENSMUSG00000040044.11	Orc3	chr4	-	34577952	34578032	34577952	34578029	34579742	34579876	1814	179238	139216	82,77	143115	102	99	3.9646e-05	0.00308535	0.556,0.517	0.358,0.394	0.16
1887	ENSMUSG00000037692.14	Ahdc1	chr4	+	133060661	133060892	133060675	133060892	133055012	133055203	1887	10,19	33,62	5,4	71,49	113	99	0.000159272	0.00933181	0.21,0.212	0.058,0.067	0.148
1888	ENSMUSG00000037692.14	Ahdc1	chr4	+	133060661	133060892	133060780	133060892	133055012	133055203	1888	46,98	69107	108,61	32,29	198	99	2.2829e-07	3.99687e-05	0.25,0.314	0.628,0.513	-0.288
1889	ENSMUSG00000037692.14	Ahdc1	chr4	+	133060675	133060892	133060780	133060892	133055012	133055203	1889	73145	69107	175107	32,29	198	99	1.12688e-10	4.009e-08	0.346,0.404	0.732,0.648	-0.315
1967	ENSMUSG00000063849.6	Ppcdc	chr9	-	57415085	57415472	57415085	57415254	57420162	57420291	1967	107190	13,27	59,52	2,2	198	99	0.000910509	0.0355007	0.805,0.779	0.937,0.929	-0.141
1977	ENSMUSG00000024392.17	Bag6	chr17	+	35142922	35143010	35142925	35143010	35142726	35142839	1977	212342	332533	175184	489447	102	99	7.87548e-05	0.00540467	0.383,0.384	0.258,0.285	0.112
2011	ENSMUSG00000013787.15	Ehmt2	chr17	+	34905609	34906058	34905909	34906058	34905341	34905456	2011	488691	257311	491469	455408	198	99	4.0811e-07	6.5049e-05	0.487,0.526	0.35,0.365	0.149
2022	ENSMUSG00000037876.17	Jmjd1c	chr10	+	67218037	67218181	67218116	67218181	67215269	67215375	2022	81149	13,21	50,35	25,30	178	99	4.49407e-07	7.03702e-05	0.776,0.798	0.527,0.394	0.327
2024	ENSMUSG00000025648.18	Pfkfb4	chr9	+	108998841	108998975	108998858	108998975	108992015	108992112	2024	0,0	8,29	2,4	8,7	116	99	9.02906e-05	0.00602886	0.0,0.0	0.176,0.328	-0.252
2038	ENSMUSG00000045672.15	Col27a1	chr4	+	63318191	63318315	63318261	63318315	63317983	63318037	2038	6,21	25,62	0,0	7,4	169	99	0.000135551	0.00820129	0.123,0.166	0.0,0.0	0.145
2039	ENSMUSG00000045672.15	Col27a1	chr4	+	63324393	63324484	63324430	63324484	63323918	63323981	2039	16,24	33,51	1,0	5,4	136	99	0.000688266	0.0285291	0.261,0.255	0.127,0.0	0.195
2102	ENSMUSG00000037487.7	Ubr5	chr15	-	38037815	38038027	38037815	38038009	38040752	38040902	2102	262409	227356	190196	289287	117	99	4.28289e-05	0.00327251	0.494,0.493	0.357,0.366	0.132
2122	ENSMUSG00000029505.17	Ep400	chr5	-	110668549	110668745	110668549	110668724	110670874	110671096	2122	160222	10,18	62,74	18,12	120	99	0.00043793	0.0204881	0.93,0.911	0.74,0.836	0.133
2129	ENSMUSG00000021417.15	Eci2	chr13	-	34993067	34993328	34993067	34993220	34994013	34994132	2129	231325	72108	306208	37,37	198	99	7.60586e-06	0.000758369	0.616,0.601	0.805,0.738	-0.163
2130	ENSMUSG00000021417.15	Eci2	chr13	-	34993067	34993230	34993067	34993220	34994013	34994144	2130	179241	72108	217141	37,37	109	99	7.98793e-05	0.00544821	0.693,0.67	0.842,0.776	-0.127
2218	ENSMUSG00000022587.14	Ly6e	chr15	+	74957776	74957877	74957779	74957877	74955482	74955717	2218	26494256	13522186	939879	828724	102	99	2.3523e-06	0.000282722	0.655,0.654	0.524,0.541	0.122
2219	ENSMUSG00000022587.14	Ly6e	chr15	+	74957776	74957877	74957779	74957877	74956554	74956713	2219	49,80	0,1	51,38	37,19	102	99	0	0	1.0,0.987	0.572,0.66	0.378
2292	ENSMUSG00000036864.16	Proser3	chr7	-	30546124	30546228	30546124	30546225	30546302	30546427	2292	8,14	19,32	0,0	7,5	102	99	1.38011e-05	0.00126023	0.29,0.298	0.0,0.0	0.294
2294	ENSMUSG00000037773.14	Pced1a	chr2	-	130422224	130422704	130422224	130422375	130422812	130422892	2294	110128	3,12	24,42	0,0	198	99	0.000274218	0.0144142	0.948,0.842	1.0,1.0	-0.105
2314	ENSMUSG00000026641.13	Usf1	chr1	+	171414372	171414529	171414436	171414529	171411312	171411440	2314	119140	497653	313296	452431	163	99	0	0	0.127,0.115	0.296,0.294	-0.174
2402	ENSMUSG00000054252.18	Fgfr3	chr5	+	33733253	33733402	33733256	33733402	33732721	33732912	2402	2,3	3,11	0,0	3,5	102	99	0.000635528	0.0269933	0.393,0.209	0.0,0.0	0.301
2405	ENSMUSG00000068917.12	Clk2	chr3	+	89168694	89168923	89168697	89168923	89167034	89167204	2405	142218	26,22	75,61	26,24	102	99	5.43519e-05	0.0040017	0.841,0.906	0.737,0.712	0.149
2412	ENSMUSG00000028057.14	Rit1	chr3	+	88717572	88717658	88717601	88717658	88717325	88717470	2412	24,43	184231	25,19	63,51	128	99	0.00051459	0.0232323	0.092,0.126	0.235,0.224	-0.12
2440	ENSMUSG00000030761.16	Myo7a	chr7	-	98065611	98065895	98065611	98065781	98066340	98066467	2440	73131	182246	104135	115,92	198	99	3.06893e-06	0.00035265	0.167,0.21	0.311,0.423	-0.178
2451	ENSMUSG00000035545.13	Leng8	chr7	+	4143258	4143697	4143418	4143697	4142833	4143037	2451	23,55	66,94	32,32	23,13	198	99	1.40752e-05	0.00127556	0.148,0.226	0.41,0.552	-0.294
2462	ENSMUSG00000026201.12	Stk16	chr1	+	75213112	75213228	75213132	75213228	75212885	75213006	2462	21,27	220330	12,11	44,41	119	99	0.000620227	0.0264952	0.074,0.064	0.185,0.182	-0.114
2476	ENSMUSG00000026812.16	Tsc1	chr2	+	28678951	28679118	28678966	28679118	28678161	28678205	2476	52,88	10,39	20,25	19,28	114	99	0.000317519	0.0161178	0.819,0.662	0.478,0.437	0.283
2529	ENSMUSG00000026821.16	Ralgds	chr2	+	28542854	28542950	28542890	28542950	28542289	28542483	2529	143231	42,63	48,53	89,72	135	99	0	0	0.714,0.729	0.283,0.351	0.405
2582	ENSMUSG00000035949.15	Fbxw2	chr2	-	34822557	34823067	34822557	34822975	34825961	34826070	2582	255304	15,13	192155	21,23	191	99	0.000440954	0.0205979	0.898,0.924	0.826,0.777	0.11
2615	ENSMUSG00000065990.12	Aurkaip1	chr4	+	155831892	155832070	155831982	155832070	155831668	155831766	2615	66100	94147	100,86	72,70	189	99	0.000363843	0.0179779	0.269,0.263	0.421,0.392	-0.14
2633	ENSMUSG00000026074.15	Map4k4	chr1	+	40003756	40003987	40003762	40003987	40001429	40001591	2633	143184	9,12	150131	30,38	105	99	2.84969e-07	4.83686e-05	0.937,0.935	0.825,0.765	0.141
2664	ENSMUSG00000038733.14	Wdr26	chr1	-	181203023	181203224	181203023	181203160	181209002	181209107	2664	14,10	170294	52,50	89,87	163	99	0	0	0.048,0.02	0.262,0.259	-0.227
2665	ENSMUSG00000038733.14	Wdr26	chr1	-	181203023	181203224	181203023	181203160	181209050	181209107	2665	13,12	211339	66,57	228232	163	99	2.77556e-15	1.84222e-12	0.036,0.021	0.15,0.13	-0.112
2703	ENSMUSG00000033793.12	Atp6v1h	chr1	+	5093362	5095728	5095614	5095728	5089008	5089111	2703	6051006	2,5	430337	167145	198	99	0	0	0.993,0.99	0.563,0.537	0.442
2731	ENSMUSG00000034729.16	Mrps10	chr17	+	47372572	47372645	47372575	47372645	47372426	47372491	2731	168183	133203	79,59	171149	102	99	1.51265e-07	2.79119e-05	0.551,0.467	0.31,0.278	0.215
2734	ENSMUSG00000053119.11	Chmp3	chr6	+	71558974	71559128	71559013	71559128	71552398	71552459	2734	9,30	6,2	7,1	0,0	138	99	0.000228033	0.0125379	0.518,0.915	1.0,1.0	-0.283
2749	ENSMUSG00000034586.14	Hid1	chr11	-	115359694	115359811	115359694	115359808	115360321	115360492	2749	1,5	26,43	24,25	77,85	102	99	0.000616096	0.0263694	0.036,0.101	0.232,0.222	-0.159
2757	ENSMUSG00000038902.14	Pogz	chr3	+	94864457	94864667	94864484	94864667	94864087	94864378	2757	81143	3,5	68,51	10,7	126	99	0.00115009	0.0421984	0.955,0.957	0.842,0.851	0.109
2767	ENSMUSG00000009575.14	Cbx5	chr15	-	103215021	103215125	103215021	103215121	103239732	103239816	2767	5,20	4,11	5,1	0,0	103	99	2.50709e-05	0.00210359	0.546,0.636	1.0,1.0	-0.409
2789	ENSMUSG00000037426.18	Depdc5	chr5	+	32864009	32864312	32864157	32864312	32863712	32863743	2789	29,54	19,28	18,15	1,1	198	99	9.77726e-06	0.000935043	0.433,0.491	0.9,0.882	-0.429
2938	ENSMUSG00000023150.14	Ivns1abp	chr1	+	151355166	151356236	151356128	151356236	151354633	151354759	2938	345505	14092049	318267	306315	198	99	0	0	0.109,0.11	0.342,0.298	-0.211
2946	ENSMUSG00000042831.13	Alkbh6	chr7	+	30312505	30312707	30312590	30312707	30312236	30312388	2946	90150	161202	123117	55,60	184	99	9.54203e-12	4.20133e-09	0.231,0.285	0.546,0.512	-0.271
2952	ENSMUSG00000027282.17	Mtch2	chr2	+	90853023	90853113	90853050	90853113	90849597	90849704	2952	35,56	16,32	29,16	135,88	126	99	0	0	0.632,0.579	0.144,0.125	0.471
2976	ENSMUSG00000033852.16	Gm28042	chr2	+	120031501	120031651	120031574	120031651	120031306	120031402	2976	14,33	51,84	47,59	53,65	172	99	3.53331e-05	0.00278593	0.136,0.184	0.338,0.343	-0.181
3005	ENSMUSG00000027523.20	Gnas	chr2	+	174341649	174341707	174341652	174341707	174334211	174334284	3005	492745	206363	909791	614569	102	99	0.000313233	0.0159194	0.699,0.666	0.59,0.574	0.101
3020	ENSMUSG00000003549.9	Ercc1	chr7	+	19354325	19354425	19354330	19354425	19350692	19350792	3020	10,26	0,0	11,6	5,2	104	99	1.97317e-05	0.00171381	1.0,1.0	0.677,0.741	0.291
3025	ENSMUSG00000029283.17	Cdc7	chr5	+	106974600	106975660	106975484	106975660	106973776	106974020	3025	72120	16,16	19,18	27,40	198	99	6.66134e-16	4.93716e-13	0.692,0.789	0.26,0.184	0.518
3087	ENSMUSG00000031816.15	Mthfsd	chr8	-	121104391	121104558	121104391	121104505	121105573	121105687	3087	47,74	177298	30,28	43,45	152	99	3.42463e-05	0.00272439	0.147,0.139	0.312,0.288	-0.157
3088	ENSMUSG00000031816.15	Mthfsd	chr8	-	121104391	121104558	121104391	121104505	121105717	121105831	3088	21,48	21,22	13,15	1,2	152	99	0.000433708	0.0203449	0.394,0.587	0.894,0.83	-0.371
3118	ENSMUSG00000070565.11	Rasal2	chr1	-	157158658	157158858	157158658	157158837	157161124	157161326	3118	9,17	21,43	8,16	4,3	120	99	1.20852e-05	0.00112433	0.261,0.246	0.623,0.815	-0.465
3119	ENSMUSG00000026121.13	Sema4c	chr1	-	36555931	36556080	36555931	36556077	36558015	36558349	3119	12,26	20,24	4,9	30,30	102	99	0.00058877	0.025619	0.368,0.513	0.115,0.226	0.27
3139	ENSMUSG00000036948.17	Map11	chr5	-	138260834	138261716	138260834	138260989	138261801	138261884	3139	71151	11,16	41,17	1,0	198	99	9.09513e-05	0.0060548	0.763,0.825	0.953,1.0	-0.182
3175	ENSMUSG00000030091.17	Nup210	chr6	-	91013069	91014496	91013069	91013316	91015823	91015907	3175	185285	4,7	18,15	3,6	198	99	5.53811e-05	0.00406402	0.959,0.953	0.75,0.556	0.303
3183	ENSMUSG00000078580.3	E430018J23Rik	chr7	-	127393000	127393114	127393000	127393111	127393289	127393629	3183	13,11	4,5	4,4	0,0	102	99	8.3514e-05	0.00563561	0.759,0.681	1.0,1.0	-0.28
3188	ENSMUSG00000028041.17	Adam15	chr3	-	89347151	89347485	89347151	89347228	89348517	89348627	3188	10,14	0,0	9,7	6,6	198	99	2.85262e-08	6.15806e-06	1.0,1.0	0.429,0.368	0.602
3245	ENSMUSG00000026584.14	Scyl3	chr1	+	163941020	163941218	163941106	163941218	163939880	163939983	3245	38,55	90130	18,19	11,11	185	99	9.99804e-06	0.000948001	0.184,0.185	0.467,0.48	-0.289
3268	ENSMUSG00000027652.15	Ralgapb	chr2	+	158450176	158450310	158450188	158450310	158448319	158448449	3268	81170	29110	24,24	43,56	111	99	8.16737e-08	1.55881e-05	0.714,0.58	0.332,0.277	0.343
3269	ENSMUSG00000040865.15	Ino80d	chr1	-	63093284	63093531	63093284	63093440	63093639	63093730	3269	48,72	15,34	82,83	5,2	190	99	4.99937e-10	1.59944e-07	0.625,0.525	0.895,0.956	-0.351
3286	ENSMUSG00000026017.13	Carf	chr1	+	60109221	60109449	60109326	60109449	60108082	60108200	3286	35,45	19,30	29,27	4,3	198	99	3.47687e-05	0.00275119	0.479,0.429	0.784,0.818	-0.347
3326	ENSMUSG00000028049.15	Scamp3	chr3	+	89179091	89179223	89179094	89179223	89177989	89178067	3326	120207	135205	112,73	178172	102	99	0.000366767	0.0180822	0.463,0.495	0.379,0.292	0.143
3344	ENSMUSG00000028864.7	Hgf	chr5	+	16572491	16572634	16572506	16572634	16566746	16566861	3344	9,10	8,6	4,5	1,0	114	99	0.000360937	0.0178542	0.494,0.591	0.776,1.0	-0.346
3351	ENSMUSG00000053253.16	Ndfip2	chr14	+	105298002	105304836	105304730	105304836	105294798	105294892	3351	571806	4,4	384359	71,74	198	99	0	0	0.986,0.99	0.73,0.708	0.269
3359	ENSMUSG00000026153.15	Fam135a	chr1	-	24028199	24030528	24028199	24029940	24030741	24030896	3359	174254	61104	174129	7,8	198	99	1.11022e-16	9.3154e-14	0.588,0.55	0.926,0.89	-0.339
3435	ENSMUSG00000042185.14	Nfrkb	chr9	+	31396793	31397137	31396999	31397137	31396322	31396497	3435	39,48	27,63	68,40	26,11	198	99	0.000323882	0.01633	0.419,0.276	0.567,0.645	-0.258
3436	ENSMUSG00000042185.14	Nfrkb	chr9	+	31396793	31397137	31397035	31397137	31396322	31396497	3436	61,73	37,90	71,42	8,8	198	99	4.37079e-08	9.08266e-06	0.452,0.289	0.816,0.724	-0.4
3437	ENSMUSG00000042185.14	Nfrkb	chr9	+	31396999	31397137	31397035	31397137	31396322	31396497	3437	59100	37,90	46,25	8,8	135	99	9.47204e-05	0.00622539	0.539,0.449	0.808,0.696	-0.258
3463	ENSMUSG00000009995.17	Taz	chrX	+	74288447	74288513	74288450	74288513	74288177	74288219	3463	13,16	71,87	0,0	13,5	102	99	0.000123461	0.00765733	0.151,0.151	0.0,0.0	0.151
3499	ENSMUSG00000005442.13	Cic	chr7	+	25292413	25292568	25292416	25292568	25292063	25292314	3499	170236	95153	51,36	92,80	102	99	5.29624e-11	2.066e-08	0.635,0.6	0.35,0.304	0.29
3554	ENSMUSG00000031278.12	Acsl4	chrX	-	142351378	142351908	142351378	142351615	142360386	142360436	3554	208280	58,79	292243	39,18	198	99	8.59115e-07	0.00012052	0.642,0.639	0.789,0.871	-0.19
3563	ENSMUSG00000027210.20	Meis2	chr2	-	115867268	115867379	115867268	115867358	115868744	115868803	3563	106166	120221	19,20	58,43	120	99	0.000752196	0.0305481	0.422,0.383	0.213,0.277	0.157
3603	ENSMUSG00000022150.16	Dab2	chr15	+	6427330	6427765	6427520	6427765	6424196	6424250	3603	5,2	0,0	14,12	1,5	198	99	0.00012031	0.0075143	1.0,1.0	0.875,0.545	0.29
3628	ENSMUSG00000025507.13	Pidd1	chr7	-	141441172	141441374	141441172	141441316	141441474	141441529	3628	36,53	4,8	8,3	0,0	157	99	0.000418744	0.0198736	0.85,0.807	1.0,1.0	-0.171
3655	ENSMUSG00000032507.15	Fbxl2	chr9	-	113983984	113984116	113983984	113984041	113984540	113984585	3655	6,7	6,15	0,1	5,7	174	99	0.000309985	0.0158075	0.363,0.21	0.0,0.075	0.249
3746	ENSMUSG00000023079.14	Gtf2ird1	chr5	-	134382529	134382685	134382529	134382586	134382780	134382830	3746	48102	145253	100116	138140	198	99	9.25069e-06	0.000890429	0.142,0.168	0.266,0.293	-0.124
3748	ENSMUSG00000001632.16	Brpf1	chr6	+	113319037	113319361	113319040	113319361	113318411	113318721	3748	35,29	39,61	4,9	33,40	102	99	0.000223491	0.0123615	0.466,0.316	0.105,0.179	0.249
3757	ENSMUSG00000031314.18	Taf1	chrX	+	101540759	101541001	101540822	101541001	101539067	101539187	3757	158266	35,90	199159	35,16	162	99	0.00138292	0.0480834	0.734,0.644	0.777,0.859	-0.129
3821	ENSMUSG00000015790.16	Surf1	chr2	-	26915595	26915784	26915595	26915769	26915954	26916006	3821	14,13	47,77	2,3	69,80	114	99	5.96073e-06	0.000612179	0.206,0.128	0.025,0.032	0.138
3888	ENSMUSG00000030177.14	Ccdc77	chr6	-	120350206	120350444	120350206	120350390	120354000	120354054	3888	74114	42,86	64,77	11,12	153	99	1.89387e-08	4.27515e-06	0.533,0.462	0.79,0.806	-0.3
3898	ENSMUSG00000037266.18	Rsrp1	chr4	+	134926025	134926818	134926734	134926818	134925292	134925432	3898	233335	131220	128132	1103845	198	99	0	0	0.471,0.432	0.055,0.072	0.388
3936	ENSMUSG00000003166.20	Dgcr2	chr16	-	17858359	17858579	17858359	17858570	17859403	17859526	3936	269415	179207	61,75	194172	108	99	0	0	0.579,0.648	0.224,0.286	0.358
3947	ENSMUSG00000054499.9	Dedd2	chr7	-	25218800	25219167	25218800	25219031	25219763	25219927	3947	85144	6,13	414317	0,3	198	99	1.45338e-09	4.2243e-07	0.876,0.847	1.0,0.981	-0.129
3948	ENSMUSG00000054499.9	Dedd2	chr7	-	25218800	25219167	25218800	25219031	25219786	25219859	3948	123186	11,20	494360	8,1	198	99	1.4131e-10	4.98733e-08	0.848,0.823	0.969,0.994	-0.146
3949	ENSMUSG00000022995.16	Enah	chr1	-	181921657	181922500	181921657	181921768	181923559	181923840	3949	92192	424659	167135	217194	198	99	1.9873e-13	1.14773e-10	0.098,0.127	0.278,0.258	-0.156
3964	ENSMUSG00000060373.15	Hnrnpc	chr14	-	52075254	52075436	52075254	52075412	52075612	52075726	3964	15062127	274369	12361116	598520	123	99	0	0	0.816,0.823	0.625,0.633	0.19
3965	ENSMUSG00000060373.15	Hnrnpc	chr14	-	52075254	52075436	52075254	52075415	52075612	52075726	3965	14862080	689964	12081079	13601110	120	99	7.32747e-15	4.7225e-12	0.64,0.64	0.423,0.445	0.206
3967	ENSMUSG00000039844.19	Rapgef1	chr2	+	29710152	29710308	29710155	29710308	29707197	29707400	3967	4,1	0,1	2,1	6,2	102	99	0.000307267	0.0157284	1.0,0.493	0.244,0.327	0.461
4032	ENSMUSG00000040363.15	Bcor	chrX	-	12048302	12048647	12048302	12048545	12048994	12049252	4032	63123	53,77	114129	12,14	198	99	1.22125e-15	8.62044e-13	0.373,0.444	0.826,0.822	-0.415
4053	ENSMUSG00000086537.7	Nespas	chr2	-	174283255	174283424	174283255	174283406	174284459	174284665	4053	5,6	3,4	1,3	0,0	117	99	2.23833e-05	0.00191421	0.585,0.559	1.0,1.0	-0.428
4060	ENSMUSG00000024962.13	Vegfb	chr19	-	6985360	6985596	6985360	6985495	6985804	6985840	4060	317524	104186	574469	137,87	198	99	0.000779036	0.0313234	0.604,0.585	0.677,0.729	-0.109
4100	ENSMUSG00000005506.16	Celf1	chr2	+	91006619	91006695	91006631	91006695	91004700	91004862	4100	437643	87161	369339	38,21	111	99	7.42637e-09	1.79075e-06	0.818,0.781	0.896,0.935	-0.116
4103	ENSMUSG00000005506.16	Celf1	chr2	+	91013490	91019490	91016565	91019490	91013237	91013402	4103	172293	358538	175172	182135	198	99	5.86085e-08	1.16354e-05	0.194,0.214	0.325,0.389	-0.153
4137	ENSMUSG00000026826.13	Nr4a2	chr2	-	57112950	57113289	57112950	57113072	57114717	57115038	4137	1,7	5,5	13,10	2,1	198	99	0.000653417	0.027444	0.091,0.412	0.765,0.833	-0.547
4151	ENSMUSG00000025157.8	Zdhhc16	chr19	+	41938719	41938836	41938807	41938836	41938363	41938452	4151	36,57	277433	51,43	97,79	187	99	1.30995e-12	6.54535e-10	0.064,0.065	0.218,0.224	-0.157
4168	ENSMUSG00000037174.18	Elf2	chr3	-	51264868	51265042	51264868	51265006	51266752	51266866	4168	209372	259410	316288	58,58	135	99	0	0	0.372,0.4	0.8,0.785	-0.406
4237	ENSMUSG00000018076.12	Med13l	chr5	+	118751839	118752009	118751866	118752009	118751530	118751754	4237	20,51	85130	7,9	69,66	126	99	0.000438141	0.0204881	0.156,0.236	0.074,0.097	0.111
4242	ENSMUSG00000028522.16	Mier1	chr4	+	103118238	103118315	103118241	103118315	103115559	103115660	4242	18,22	7,9	6,1	0,0	102	99	6.81605e-05	0.00478847	0.714,0.703	1.0,1.0	-0.292
4243	ENSMUSG00000028522.16	Mier1	chr4	+	103118238	103118315	103118280	103118315	103115559	103115660	4243	32,43	11,12	9,3	0,0	141	99	2.81875e-05	0.00230847	0.671,0.716	1.0,1.0	-0.306
4244	ENSMUSG00000028522.16	Mier1	chr4	+	103118241	103118315	103118280	103118315	103115559	103115660	4244	21,30	11,12	3,2	0,0	138	99	5.77962e-05	0.00423426	0.578,0.642	1.0,1.0	-0.39
4301	ENSMUSG00000027624.19	Epb41l1	chr2	+	156510735	156510881	156510756	156510881	156509131	156509307	4301	175321	73120	125,98	15,11	120	99	5.15702e-08	1.0377e-05	0.664,0.688	0.873,0.88	-0.201
4308	ENSMUSG00000006019.15	Dhx34	chr7	-	16217987	16219184	16217987	16218950	16221683	16221993	4308	4,16	5,10	4,7	1,0	198	99	0.000248697	0.013357	0.286,0.444	0.667,1.0	-0.469
4322	ENSMUSG00000059713.12	Rcan3	chr4	-	135412307	135416598	135412307	135412490	135418379	135418551	4322	220335	14,17	112119	42,21	198	99	2.01035e-07	3.57601e-05	0.887,0.908	0.571,0.739	0.242
4335	ENSMUSG00000004565.15	Pnpla6	chr8	+	3523998	3524166	3524010	3524166	3523757	3523867	4335	41,35	45,51	45,43	20,15	111	99	1.01686e-05	0.000962127	0.448,0.38	0.667,0.719	-0.279
4340	ENSMUSG00000005687.14	Bcas2	chr3	+	103175618	103177419	103177338	103177419	103174339	103174501	4340	7151146	30,59	661558	124124	198	99	0	0	0.923,0.907	0.727,0.692	0.206
4372	ENSMUSG00000027569.15	Mrgbp	chr2	+	180584693	180584871	180584796	180584871	180584405	180584487	4372	89135	128160	58,53	28,32	198	99	2.49798e-05	0.00210027	0.258,0.297	0.509,0.453	-0.204
4390	ENSMUSG00000027550.14	Lrrcc1	chr3	+	14551171	14551527	14551387	14551527	14550250	14550455	4390	2,6	47,57	16,11	43,32	198	99	6.9854e-05	0.00488429	0.021,0.05	0.157,0.147	-0.116
4418	ENSMUSG00000029516.19	Cit	chr5	+	115846283	115846466	115846346	115846466	115845277	115845323	4418	17,44	0,16	30,19	1,0	162	99	0.000656216	0.0275042	1.0,0.627	0.948,1.0	-0.16
4424	ENSMUSG00000031691.14	Tnpo2	chr8	+	85038334	85038489	85038377	85038489	85036914	85036977	4424	255391	77116	449390	214184	142	99	0.00116308	0.0423954	0.698,0.701	0.594,0.596	0.105
4430	ENSMUSG00000032850.16	Rnft2	chr5	-	118237126	118237599	118237126	118237596	118242457	118242516	4430	7,4	5,3	0,2	3,8	102	99	0.000846489	0.0336703	0.576,0.564	0.0,0.195	0.472
4467	ENSMUSG00000022536.14	Glyr1	chr16	-	5021337	5021448	5021337	5021430	5026507	5026607	4467	309420	149229	114,84	16,11	117	99	4.14454e-10	1.33556e-07	0.637,0.608	0.858,0.866	-0.239
4487	ENSMUSG00000023707.13	Ogfod2	chr5	+	124114064	124114645	124114387	124114645	124113428	124113528	4487	103121	29,32	149145	9,9	198	99	4.61284e-08	9.47055e-06	0.64,0.654	0.892,0.89	-0.244
4488	ENSMUSG00000023707.13	Ogfod2	chr5	+	124114064	124114645	124114478	124114645	124113428	124113528	4488	219230	10,25	302321	3,4	198	99	1.29032e-07	2.39085e-05	0.916,0.821	0.981,0.976	-0.11
4489	ENSMUSG00000023707.13	Ogfod2	chr5	+	124114387	124114645	124114478	124114645	124113428	124113528	4489	149154	10,25	169185	3,4	190	99	3.78207e-06	0.000421525	0.886,0.762	0.967,0.96	-0.139
4490	ENSMUSG00000023707.13	Ogfod2	chr5	+	124114387	124114645	124114478	124114645	124114064	124114192	4490	197217	19,15	330356	5,6	190	99	6.96429e-07	0.000101313	0.844,0.883	0.972,0.969	-0.107
4514	ENSMUSG00000084128.10	Esrp2	chr8	-	106133778	106133889	106133778	106133886	106133959	106134014	4514	28,42	6,12	4,2	0,0	102	99	0.000264426	0.0139548	0.819,0.773	1.0,1.0	-0.204
4521	ENSMUSG00000060261.15	Gtf2i	chr5	-	134243506	134243599	134243506	134243587	134243900	134243956	4521	485719	423627	244242	359333	111	99	7.31236e-05	0.00508095	0.506,0.506	0.377,0.393	0.121
4564	ENSMUSG00000025473.16	Adam8	chr7	-	139991345	139991449	139991345	139991446	139992431	139992562	4564	6,1	2,10	0,0	2,1	102	99	0.000222075	0.0122985	0.744,0.088	0.0,0.0	0.416
4583	ENSMUSG00000036639.12	Nudt1	chr5	+	140332394	140332473	140332422	140332473	140331908	140331955	4583	31,37	65,90	3,1	27,18	127	99	6.69093e-05	0.00473045	0.271,0.243	0.08,0.042	0.196
4592	ENSMUSG00000038225.15	Primpol	chr8	-	46592592	46593703	46592592	46592755	46599718	46599866	4592	29,72	2,0	31,22	5,5	198	99	0.000106274	0.00684931	0.879,1.0	0.756,0.688	0.218
4595	ENSMUSG00000029625.16	Cpsf4	chr5	+	145178757	145178928	145178832	145178928	145177229	145177302	4595	74112	187238	109112	64,53	174	99	0	0	0.184,0.211	0.492,0.546	-0.322
4596	ENSMUSG00000029625.16	Cpsf4	chr5	+	145178757	145178928	145178835	145178928	145177229	145177302	4596	81116	110179	112114	47,44	177	99	9.58678e-13	4.90027e-10	0.292,0.266	0.571,0.592	-0.302
4597	ENSMUSG00000029625.16	Cpsf4	chr5	+	145178783	145178928	145178832	145178928	145177229	145177302	4597	25,37	187238	25,22	64,53	148	99	4.7439e-05	0.00356957	0.082,0.094	0.207,0.217	-0.124
4598	ENSMUSG00000029625.16	Cpsf4	chr5	+	145178783	145178928	145178835	145178928	145177229	145177302	4598	32,41	110179	28,24	47,44	151	99	0.0009639	0.0366992	0.16,0.131	0.281,0.263	-0.127
4655	ENSMUSG00000032562.13	Gnai2	chr9	-	107614124	107615098	107614124	107614715	107615611	107615825	4655	18123105	208387	34923034	829757	198	99	3.58288e-10	1.163e-07	0.813,0.8	0.678,0.667	0.134
4660	ENSMUSG00000030556.13	Lrrc28	chr7	-	67559857	67560064	67559857	67559969	67617992	67618130	4660	28,78	34,50	15,28	4,3	194	99	0.000244939	0.0132834	0.296,0.443	0.657,0.826	-0.372
4684	ENSMUSG00000002409.18	Dyrk1b	chr7	+	28185713	28186029	28185833	28186029	28185295	28185436	4684	58108	33,43	84,65	6,6	198	99	1.12591e-08	2.64917e-06	0.468,0.557	0.875,0.844	-0.347
4746	ENSMUSG00000039205.16	Ciz1	chr2	+	32363432	32363656	32363622	32363656	32363060	32363158	4746	65,83	5,16	60,38	24,18	198	99	0.000606543	0.0260861	0.867,0.722	0.556,0.514	0.259
4754	ENSMUSG00000031826.20	Usp10	chr8	+	119941109	119942138	119941112	119942138	119931848	119931917	4754	11,17	2,4	12,8	20,20	102	99	1.22601e-06	0.000164219	0.842,0.805	0.368,0.28	0.499
4756	ENSMUSG00000041408.18	Wapl	chr14	+	34694986	34695105	34695004	34695105	34691681	34692734	4756	597877	110119	567496	26,24	117	99	1.17624e-11	5.02954e-09	0.821,0.862	0.949,0.946	-0.106
4815	ENSMUSG00000101655.1	2310040G24Rik	chr6	-	86483375	86483717	86483375	86483699	86487794	86488227	4815	1,1	0,0	1,0	1,1	117	99	0.00142562	0.0493365	1.0,1.0	0.458,0.0	0.771
4860	ENSMUSG00000024201.12	Kdm4b	chr17	+	56394768	56394889	56394789	56394889	56393717	56394106	4860	201258	57,56	102105	55,44	120	99	0.000525545	0.0236201	0.744,0.792	0.605,0.663	0.134
4862	ENSMUSG00000034269.12	Setd5	chr6	+	113110316	113110525	113110373	113110525	113104934	113105121	4862	152270	2,5	325269	49,36	156	99	4.13258e-12	1.91433e-09	0.98,0.972	0.808,0.826	0.159
4864	ENSMUSG00000034269.12	Setd5	chr6	+	113110316	113110525	113110373	113110525	113109884	113109990	4864	393651	375650	293286	195172	156	99	0.000704569	0.0290113	0.399,0.389	0.488,0.513	-0.106
4896	ENSMUSG00000024137.9	E4f1	chr17	-	24446781	24446934	24446781	24446841	24447089	24447210	4896	175314	12,12	321306	39,47	192	99	1.84181e-05	0.00161261	0.883,0.931	0.809,0.77	0.117
4920	ENSMUSG00000063870.12	Chd4	chr6	+	125102431	125102610	125102470	125102610	125102162	125102298	4920	8521219	330426	660570	138130	138	99	4.08934e-05	0.00315412	0.649,0.672	0.774,0.759	-0.106
4929	ENSMUSG00000030346.16	Rad51ap1	chr6	-	126927537	126927690	126927537	126927687	126929992	126930102	4929	1,5	0,0	24,19	5,10	102	99	0.000145396	0.00870222	1.0,1.0	0.823,0.648	0.264
4969	ENSMUSG00000033439.12	Trmt13	chr3	-	116582493	116582883	116582493	116582724	116585195	116585270	4969	60,69	25,17	23,13	23,14	198	99	0.000356225	0.0176603	0.545,0.67	0.333,0.317	0.283
4970	ENSMUSG00000033439.12	Trmt13	chr3	-	116582493	116582923	116582493	116582724	116585195	116585270	4970	108102	25,17	30,16	23,14	198	99	1.97138e-06	0.000247861	0.684,0.75	0.395,0.364	0.338
4984	ENSMUSG00000016028.10	Celsr1	chr15	-	85901438	85901672	85901438	85901669	85902114	85902264	4984	4,6	1,5	3,2	0,0	102	99	5.14289e-05	0.0038181	0.795,0.538	1.0,1.0	-0.333
5057	ENSMUSG00000038780.14	Smurf1	chr5	-	144880624	144880709	144880624	144880700	144881617	144881819	5057	364555	137163	501387	375350	108	99	1.88038e-12	9.29119e-10	0.709,0.757	0.55,0.503	0.207
5100	ENSMUSG00000042156.16	Dzip1	chr14	-	118909433	118909571	118909433	118909568	118911341	118911503	5100	18,23	6,10	41,16	2,2	102	99	0.00057795	0.0253829	0.744,0.691	0.952,0.886	-0.202
5112	ENSMUSG00000030409.15	Dmpk	chr7	+	19092417	19092632	19092546	19092632	19091938	19092254	5112	6,15	6,14	0,1	4,3	198	99	0.000220926	0.0122654	0.333,0.349	0.0,0.143	0.269
5113	ENSMUSG00000030409.15	Dmpk	chr7	+	19092417	19092632	19092542	19092632	19092207	19092254	5113	6,15	15,12	0,1	4,3	198	99	0.000764665	0.0309415	0.167,0.385	0.0,0.143	0.205
5116	ENSMUSG00000037262.7	Kin	chr2	+	10090112	10090363	10090240	10090363	10085729	10085824	5116	97159	3,12	28,23	10,6	198	99	6.31599e-05	0.0045229	0.942,0.869	0.583,0.657	0.285
5149	ENSMUSG00000040940.18	Arhgef1	chr7	+	24918519	24919351	24919183	24919351	24917894	24918000	5149	4,3	1,1	0,1	2,2	198	99	9.58327e-05	0.00628566	0.667,0.6	0.0,0.2	0.533
5233	ENSMUSG00000036733.16	Rbm42	chr7	-	30645666	30645842	30645666	30645821	30647559	30647634	5233	139174	155204	103,79	181171	120	99	0.000668142	0.0279251	0.425,0.413	0.319,0.276	0.121
5234	ENSMUSG00000040225.15	Prrc2c	chr1	-	162723109	162723287	162723109	162723281	162724703	162724869	5234	272427	120181	299239	54,35	105	99	3.03466e-09	8.12959e-07	0.681,0.69	0.839,0.866	-0.167
5243	ENSMUSG00000021109.13	Hif1a	chr12	+	73941687	73941852	73941729	73941852	73940347	73940631	5243	19442828	537745	14221271	153160	141	99	2.19258e-12	1.07147e-09	0.718,0.727	0.867,0.848	-0.135
5247	ENSMUSG00000060601.13	Nr1h2	chr7	-	44551954	44552343	44551954	44552245	44552506	44552620	5247	34,45	68104	26,27	22,26	197	99	0.00093043	0.0357926	0.201,0.179	0.373,0.343	-0.168
5253	ENSMUSG00000036459.15	Wtip	chr7	-	34118674	34118827	34118674	34118805	34119138	34119206	5253	16,37	5,5	19,19	0,0	121	99	4.95882e-05	0.0037062	0.724,0.858	1.0,1.0	-0.209
5367	ENSMUSG00000026004.15	Kansl1l	chr1	-	66773421	66773619	66773421	66773514	66777966	66778108	5367	95135	33,70	68,93	14,9	198	99	0.000151273	0.00898145	0.59,0.491	0.708,0.838	-0.232
5460	ENSMUSG00000030929.17	Eri2	chr7	-	119786738	119787485	119786738	119786827	119787733	119787834	5460	77,73	11,15	12,12	7,13	198	99	0.000113485	0.00719923	0.778,0.709	0.462,0.316	0.355
5465	ENSMUSG00000029416.17	Slc15a4	chr5	-	127604537	127604706	127604537	127604648	127608771	127609061	5465	375551	113181	720610	49,43	157	99	0	0	0.677,0.657	0.903,0.899	-0.234
5497	ENSMUSG00000061079.14	Zfp143	chr7	+	110072118	110072202	110072121	110072202	110071371	110071455	5497	97128	46,82	76,56	88,54	102	99	0.000910745	0.0355007	0.672,0.602	0.456,0.502	0.158
5522	ENSMUSG00000055720.10	Ubl7	chr9	+	57911709	57911825	57911716	57911825	57911031	57911059	5522	1,4	33,38	7,10	21,26	106	99	0.000477165	0.0219664	0.028,0.09	0.237,0.264	-0.192
5534	ENSMUSG00000046897.17	Zfp740	chr15	+	102208235	102208361	102208271	102208361	102207770	102207920	5534	302493	149242	279266	46,46	135	99	1.27728e-11	5.40958e-09	0.598,0.599	0.816,0.809	-0.214
5548	ENSMUSG00000032547.12	Ryk	chr9	+	102885993	102886128	102886002	102886128	102881653	102881754	5548	366477	237363	232210	405386	108	99	2.94542e-13	1.61707e-10	0.586,0.546	0.344,0.333	0.228
5585	ENSMUSG00000024795.11	Kif20b	chr19	+	34941212	34941441	34941332	34941441	34940092	34940231	5585	97134	78111	131103	9,5	198	99	0	0	0.383,0.376	0.879,0.912	-0.516
5604	ENSMUSG00000041769.13	Ppp2r2d	chr7	+	138872873	138873051	138873000	138873051	138846619	138846704	5604	136226	0,1	203149	15,20	198	99	6.20046e-11	2.36577e-08	1.0,0.991	0.871,0.788	0.166
5605	ENSMUSG00000041769.13	Ppp2r2d	chr7	+	138872873	138873051	138873000	138873051	138868409	138868507	5605	136225	0,2	199153	13,27	198	99	2.9374e-10	9.7051e-08	1.0,0.983	0.884,0.739	0.18
5658	ENSMUSG00000028060.14	Khdc4	chr3	+	88709829	88709942	88709857	88709942	88708779	88708941	5658	258355	53,75	142113	6,10	127	99	2.22252e-06	0.000270686	0.791,0.787	0.949,0.898	-0.134
5670	ENSMUSG00000029534.17	St7	chr6	+	17850356	17852412	17852257	17852412	17848003	17848079	5670	17,36	62,75	6,1	40,17	198	99	0.00123443	0.0443059	0.121,0.194	0.07,0.029	0.108
5695	ENSMUSG00000040856.17	Dlk1	chr12	+	109460045	109463336	109460117	109463336	109459606	109459892	5695	9831698	247385	1182982	157125	171	99	1.65666e-06	0.000214162	0.697,0.719	0.813,0.82	-0.109
5730	ENSMUSG00000036977.8	Anapc10	chr8	+	79713104	79713279	79713152	79713279	79711819	79711844	5730	74,95	57,71	56,49	14,17	147	99	0.000125382	0.00775488	0.466,0.474	0.729,0.66	-0.225
5769	ENSMUSG00000067629.13	Syngap1	chr17	+	26959401	26959845	26959608	26959845	26958076	26958221	5769	5,42	1,10	17,12	0,1	198	99	0.000305784	0.0157023	0.714,0.677	1.0,0.857	-0.233
5790	ENSMUSG00000031833.10	Mast3	chr8	-	70789847	70789920	70789847	70789917	70789996	70790085	5790	62,94	12,14	77,47	34,24	102	99	0.000135499	0.00820129	0.834,0.867	0.687,0.655	0.179
5794	ENSMUSG00000023994.13	Nfya	chr17	-	48392339	48392500	48392339	48392488	48393179	48393285	5794	27,36	99162	28,35	57,54	111	99	0.000285261	0.0148717	0.196,0.165	0.305,0.366	-0.155
5795	ENSMUSG00000023994.13	Nfya	chr17	-	48392339	48392506	48392339	48392488	48393179	48393285	5795	131207	99162	133150	57,54	117	99	6.56511e-05	0.00465631	0.528,0.52	0.664,0.702	-0.159
5837	ENSMUSG00000031667.16	Aktip	chr8	-	91129599	91129843	91129599	91129805	91131040	91131152	5837	9,15	182294	43,51	165146	137	99	3.61933e-14	2.17502e-11	0.035,0.036	0.158,0.202	-0.144
5877	ENSMUSG00000036270.16	Edc4	chr8	+	105889630	105889729	105889672	105889729	105889103	105889540	5877	88121	35,48	77,67	11,12	141	99	0.000420302	0.0199262	0.638,0.639	0.831,0.797	-0.175
5905	ENSMUSG00000045078.12	Rnf216	chr5	-	143090119	143090929	143090119	143090758	143092994	143093125	5905	368558	120184	260220	39,31	198	99	1.61713e-06	0.000210274	0.605,0.603	0.769,0.78	-0.17
5917	ENSMUSG00000025316.16	Banp	chr8	+	122007090	122007162	122007099	122007162	122005551	122005682	5917	121158	115163	29,32	136112	108	99	3.34177e-14	2.03573e-11	0.491,0.47	0.164,0.208	0.294
5925	ENSMUSG00000001017.15	Chtop	chr3	-	90503095	90503282	90503095	90503279	90506107	90506261	5925	476779	271393	230219	199187	102	99	0.000279917	0.0146618	0.63,0.658	0.529,0.532	0.114
5946	ENSMUSG00000025899.14	Alkbh8	chr9	+	3349357	3349490	3349419	3349490	3345780	3345876	5946	16,3	2,3	2,4	34,25	161	99	5.59966e-06	0.000581285	0.831,0.381	0.035,0.09	0.543
5993	ENSMUSG00000026333.14	Gin1	chr1	+	97782926	97783232	97783193	97783232	97777325	97777519	5993	69,95	5,16	20,10	0,0	198	99	6.40878e-05	0.00457461	0.873,0.748	1.0,1.0	-0.19
6091	ENSMUSG00000032340.8	Neo1	chr9	-	58906870	58907094	58906870	58907046	58908403	58908499	6091	52,59	271439	145134	201209	147	99	0	0	0.114,0.083	0.327,0.302	-0.216
6092	ENSMUSG00000032340.8	Neo1	chr9	-	58930955	58931175	58930955	58931115	58955958	58956079	6092	384579	118202	715600	52,63	159	99	0	0	0.67,0.641	0.895,0.856	-0.22
6210	ENSMUSG00000054792.15	Klhl18	chr9	-	110436010	110436248	110436010	110436233	110437346	110437483	6210	6,24	10,10	0,0	4,3	114	99	2.43883e-06	0.000289986	0.343,0.676	0.0,0.0	0.51
6264	ENSMUSG00000031660.13	Brd7	chr8	-	88334104	88334219	88334104	88334216	88339408	88339520	6264	9,7	0,0	1,3	1,4	102	99	1.25649e-05	0.00116167	1.0,1.0	0.493,0.421	0.543
6289	ENSMUSG00000010476.14	Ebf3	chr7	-	137198491	137198689	137198491	137198581	137199093	137199282	6289	0,4	2,1	1,2	0,0	198	99	0.000626	0.0266905	0.0,0.667	1.0,1.0	-0.666
6343	ENSMUSG00000069045.11	Ddx3y	chrY	-	1282900	1282968	1282900	1282945	1284321	1284382	6343	26,44	3,9	6,1	0,0	122	99	0.000543685	0.0242504	0.876,0.799	1.0,1.0	-0.162
6344	ENSMUSG00000069045.11	Ddx3y	chrY	-	1282900	1283005	1282900	1282945	1284321	1284382	6344	23,41	3,9	7,1	0,0	159	99	0.000211649	0.0118375	0.827,0.739	1.0,1.0	-0.217
6478	ENSMUSG00000043384.15	Gprasp1	chrX	+	135744282	135744575	135744498	135744575	135743562	135743614	6478	2,1	47,56	5,3	8,5	198	99	2.09749e-05	0.00180417	0.021,0.009	0.238,0.231	-0.219
6479	ENSMUSG00000043384.15	Gprasp1	chrX	+	135750514	135750586	135750535	135750586	135748655	135748782	6479	3,6	4,8	0,0	2,3	120	99	3.35794e-05	0.00268018	0.382,0.382	0.0,0.0	0.382
6481	ENSMUSG00000043384.15	Gprasp1	chrX	+	135797552	135797932	135797787	135797932	135751944	135752017	6481	4,2	0,0	0,1	2,1	198	99	1.23488e-06	0.00016491	1.0,1.0	0.0,0.333	0.834
6717	ENSMUSG00000000355.13	Mcts1	chrX	+	38608270	38608331	38608300	38608331	38605938	38606072	6717	3,2	2,3	2,1	0,0	129	99	5.40373e-06	0.000568094	0.535,0.338	1.0,1.0	-0.564
6869	ENSMUSG00000025026.15	Add3	chr19	+	53159379	53159632	53159560	53159632	53143004	53143089	6869	2,4	1,2	1,3	0,0	198	99	0.000605616	0.0260714	0.5,0.5	1.0,1.0	-0.5
7092	ENSMUSG00000024789.13	Jak2	chr19	+	29280741	29280902	29280744	29280902	29276749	29276895	7092	1,1	0,0	0,0	3,2	102	99	2.67346e-09	7.24932e-07	1.0,1.0	0.0,0.0	1
7141	ENSMUSG00000024642.17	Tle4	chr19	-	14517771	14517976	14517771	14517973	14564388	14564451	7141	18,32	2,7	7,1	0,0	102	99	0.000703447	0.0289919	0.897,0.816	1.0,1.0	-0.143
7175	ENSMUSG00000024664.5	Fads3	chr19	+	10054437	10054666	10054454	10054666	10054226	10054349	7175	5,12	0,10	5,5	0,0	116	99	0.000308179	0.0157489	1.0,0.506	1.0,1.0	-0.247
7234	ENSMUSG00000010097.15	Nxf1	chr19	+	8766736	8766833	8766796	8766833	8764921	8765031	7234	98188	451735	69,47	121,99	159	99	3.56079e-06	0.000400882	0.119,0.137	0.262,0.228	-0.117
7275	ENSMUSG00000056629.16	Fkbp2	chr19	-	6978972	6979208	6978972	6979082	6980393	6980501	7275	2,0	3,9	1,7	1,2	198	99	0.000897968	0.035129	0.25,0.0	0.333,0.636	-0.36
7361	ENSMUSG00000024941.9	Scyl1	chr19	-	5759664	5759819	5759664	5759753	5759980	5760145	7361	187300	25,42	129110	11,2	165	99	0.00144254	0.0496901	0.818,0.811	0.876,0.971	-0.109
7362	ENSMUSG00000024941.9	Scyl1	chr19	-	5759664	5759834	5759664	5759753	5759980	5760145	7362	190298	25,42	135113	11,2	180	99	0.00100048	0.0376406	0.807,0.796	0.871,0.969	-0.118
7783	ENSMUSG00000024608.11	Rps14	chr18	+	60776387	60776462	60776400	60776462	60774680	60774781	7783	128227	111135	151110	30,30	112	99	2.42192e-08	5.33181e-06	0.505,0.598	0.816,0.764	-0.239
8086	ENSMUSG00000066057.7	Gm1976	chr17	-	94820335	94820741	94820335	94820396	94834691	94834799	8086	48,77	37,55	8,6	24,15	198	99	3.13165e-05	0.00254132	0.393,0.412	0.143,0.167	0.247
8240	ENSMUSG00000041057.10	Wdr43	chr17	+	71657192	71657390	71657316	71657390	71653452	71653522	8240	1,2	0,0	1,0	2,1	198	99	1.12297e-06	0.000152977	1.0,1.0	0.2,0.0	0.9
8309	ENSMUSG00000079414.3	Gm11110	chr17	-	57102054	57102371	57102054	57102153	57103349	57103484	8309	6,11	23,23	2,0	15,13	198	99	0.00118035	0.0428843	0.115,0.193	0.062,0.0	0.123
8354	ENSMUSG00000000708.14	Kat2b	chr17	+	53665405	53665896	53665652	53665896	53663534	53663649	8354	70119	0,0	51,57	5,5	198	99	8.11853e-06	0.000798741	1.0,1.0	0.836,0.851	0.157
8431	ENSMUSG00000023944.14	Hsp90ab1	chr17	-	45570257	45570685	45570257	45570557	45571017	45571177	8431	51,66	1,0	81,99	80,32	198	99	5.80092e-13	3.0349e-10	0.962,1.0	0.336,0.607	0.509
8432	ENSMUSG00000023944.14	Hsp90ab1	chr17	-	45570257	45570692	45570257	45570557	45571017	45571177	8432	51,66	1,0	77,94	80,32	198	99	2.68119e-13	1.52862e-10	0.962,1.0	0.325,0.595	0.521
8452	ENSMUSG00000023912.10	Slc25a27	chr17	-	43659815	43660098	43659815	43659898	43661613	43661698	8452	0,0	6,6	3,2	2,3	198	99	0.000403252	0.019324	0.0,0.0	0.429,0.25	-0.34
8485	ENSMUSG00000038500.15	Prr3	chr17	-	35978380	35978598	35978380	35978443	35978710	35978971	8485	1,15	57,87	15,17	15,19	198	99	2.5183e-09	6.91289e-07	0.009,0.079	0.333,0.309	-0.277
8557	ENSMUSG00000007036.15	Abhd16a	chr17	+	35100784	35100911	35100884	35100911	35100638	35100688	8557	4,7	4,2	3,5	23,20	198	99	0.00102198	0.0382876	0.333,0.636	0.061,0.111	0.399
8615	ENSMUSG00000015461.15	Atf6b	chr17	+	34653485	34653572	34653504	34653572	34653213	34653295	8615	6,15	5,8	5,5	0,1	118	99	0.000401643	0.0192884	0.502,0.611	1.0,0.808	-0.348
8630	ENSMUSG00000092595.2	Gm20427	chr17	-	34030565	34031262	34030565	34030734	34031547	34031580	8630	56107	11,4	382352	0,1	198	99	8.10426e-09	1.93762e-06	0.718,0.93	1.0,0.994	-0.173
8640	ENSMUSG00000067203.8	H2-K2	chr17	-	33978122	33978616	33978122	33978523	33978726	33978827	8640	3,6	6,19	31,24	13,12	192	99	1.39492e-05	0.00127115	0.205,0.14	0.551,0.508	-0.357
8676	ENSMUSG00000095253.4	Zfp799	chr17	-	32821077	32821099	32821077	32821096	32821777	32821838	8676	60,64	2,24	4,6	0,0	102	99	0.00054309	0.0242482	0.967,0.721	1.0,1.0	-0.156
8697	ENSMUSG00000090083.11	Rnf8	chr17	+	29628959	29629257	29629051	29629257	29626946	29627249	8697	185225	0,1	58,38	2,6	191	99	4.06972e-05	0.00314845	1.0,0.991	0.938,0.767	0.143
8720	ENSMUSG00000063952.16	Brpf3	chr17	+	28810411	28810669	28810512	28810669	28806038	28807399	8720	0,2	16,53	4,7	18,23	198	99	0.000227115	0.0125152	0.0,0.019	0.1,0.132	-0.107
8844	ENSMUSG00000024193.8	Phf1	chr17	+	26934946	26935154	26935064	26935154	26934630	26934726	8844	1,0	0,2	2,1	0,0	198	99	0.00119564	0.0431926	1.0,0.0	1.0,1.0	-0.5
8892	ENSMUSG00000073434.12	Wdr90	chr17	-	25859099	25859483	25859099	25859318	25859857	25859925	8892	4,12	0,0	6,7	3,1	198	99	0.00098133	0.0371457	1.0,1.0	0.5,0.778	0.361
8951	ENSMUSG00000015120.15	Ube2i	chr17	-	25272537	25272765	25272537	25272665	25273320	25273914	8951	57,59	20,17	19,23	2,1	198	99	0.000976334	0.0370457	0.588,0.634	0.826,0.92	-0.262
8991	ENSMUSG00000079641.3	Rpl39	chrX	-	37083984	37084171	37083984	37084108	37085124	37085402	8991	2,0	1,2	3,6	0,0	162	99	0.000135125	0.00819783	0.55,0.0	1.0,1.0	-0.725
8993	ENSMUSG00000079641.3	Rpl39	chrX	-	37083984	37084360	37083984	37084108	37085124	37085402	8993	3,0	1,2	4,6	0,0	198	99	0.000297207	0.015358	0.6,0.0	1.0,1.0	-0.7
9001	ENSMUSG00000079641.3	Rpl39	chrX	-	37083984	37084240	37083984	37084132	37085124	37085402	9001	0,5	21,24	24,16	38,39	198	99	0.000151652	0.00899198	0.0,0.094	0.24,0.17	-0.158
9031	ENSMUSG00000044533.15	Rps2	chr17	+	24720943	24721169	24721121	24721169	24720533	24720731	9031	1,2	0,0	7,3	5,1	198	99	1.69437e-06	0.000217143	1.0,1.0	0.412,0.6	0.494
9038	ENSMUSG00000044533.15	Rps2	chr17	+	24720957	24721169	24721121	24721169	24720533	24720731	9038	1,1	0,0	2,3	5,1	198	99	3.52121e-07	5.73583e-05	1.0,1.0	0.167,0.6	0.617
9040	ENSMUSG00000044533.15	Rps2	chr17	+	24720957	24721302	24721192	24721302	24720533	24720731	9040	0,1	2,0	2,3	0,0	198	99	0.00119564	0.0431926	0.0,1.0	1.0,1.0	-0.5
9049	ENSMUSG00000044533.15	Rps2	chr17	+	24721019	24721169	24721121	24721169	24720533	24720731	9049	8,4	0,0	6,11	5,1	198	99	4.54497e-05	0.00344318	1.0,1.0	0.375,0.846	0.389
9147	ENSMUSG00000040097.16	Flywch1	chr17	-	23770234	23770332	23770234	23770328	23771414	23771602	9147	35,40	8,10	5,5	0,0	103	99	0.00016594	0.00968416	0.808,0.794	1.0,1.0	-0.199
9167	ENSMUSG00000071267.11	Zfp942	chr17	-	21932992	21933113	21932992	21933074	21941725	21941850	9167	42,71	4,6	6,15	0,0	138	99	0.00113322	0.0417171	0.883,0.895	1.0,1.0	-0.111
9190	ENSMUSG00000068036.15	Afdn	chr17	+	13823238	13823458	13823299	13823458	13822265	13822377	9190	3,1	4,1	3,5	0,0	160	99	3.69315e-06	0.000413689	0.317,0.382	1.0,1.0	-0.65
9262	ENSMUSG00000045975.8	C2cd2	chr16	-	97886087	97886210	97886087	97886207	97890013	97890118	9262	37,43	5,5	7,4	0,0	102	99	0.00133412	0.04689	0.878,0.893	1.0,1.0	-0.115
9391	ENSMUSG00000062949.13	Atp11c	chrX	-	60247888	60248323	60247888	60247948	60266735	60266910	9391	5,2	0,0	3,0	3,2	198	99	3.07752e-08	6.57967e-06	1.0,1.0	0.333,0.0	0.834
9427	ENSMUSG00000022749.8	Tbc1d23	chr16	-	57212370	57212570	57212370	57212490	57214163	57214269	9427	3,8	3,12	4,4	1,0	179	99	0.000129949	0.00798179	0.356,0.269	0.689,1.0	-0.532
9469	ENSMUSG00000022641.15	Bbx	chr16	-	50274546	50274789	50274546	50274675	50280368	50280539	9469	179309	25,41	250176	4,7	198	99	1.59749e-08	3.70001e-06	0.782,0.79	0.969,0.926	-0.161
9506	ENSMUSG00000022687.12	Boc	chr16	-	44492812	44492975	44492812	44492972	44496251	44496559	9506	5,5	5,2	0,0	4,3	102	99	2.76922e-07	4.73643e-05	0.493,0.708	0.0,0.0	0.601
9535	ENSMUSG00000022837.14	Iqcb1	chr16	+	36831496	36831614	36831501	36831614	36828446	36828492	9535	1,3	0,1	5,2	17,16	104	99	8.74945e-05	0.00585095	1.0,0.741	0.219,0.106	0.708
9598	ENSMUSG00000022801.13	Lrch3	chr16	+	32988425	32988481	32988433	32988481	32986738	32986888	9598	8,4	7,8	2,2	0,0	107	99	4.0843e-06	0.000448466	0.514,0.316	1.0,1.0	-0.585
9653	ENSMUSG00000022855.9	Senp2	chr16	+	22038521	22038668	22038536	22038668	22032103	22032164	9653	4,9	2,1	4,1	5,10	114	99	0.000547138	0.02438	0.635,0.887	0.41,0.08	0.516
9681	ENSMUSG00000022843.17	Clcn2	chr16	-	20712056	20712182	20712056	20712136	20712311	20712787	9681	61,84	4,13	44,32	0,0	145	99	1.24229e-05	0.00115093	0.912,0.815	1.0,1.0	-0.137
9711	ENSMUSG00000062901.3	Klhl24	chr16	+	20116633	20116866	20116811	20116866	20115883	20116002	9711	0,3	5,0	12,4	0,0	198	99	0.00114592	0.0420803	0.0,1.0	1.0,1.0	-0.5
9928	ENSMUSG00000039473.8	Ubn1	chr16	+	5070549	5070719	5070648	5070719	5064586	5064786	9928	8,17	139224	24,31	46,65	198	99	3.28182e-13	1.75834e-10	0.028,0.037	0.207,0.193	-0.168
9931	ENSMUSG00000022515.6	Anks3	chr16	-	4945768	4946206	4945768	4946155	4947264	4947432	9931	1,9	4,3	6,9	0,1	150	99	0.000194474	0.011045	0.142,0.664	1.0,0.856	-0.525
10030	ENSMUSG00000009733.9	Tfcp2	chr15	-	100551324	100551506	100551324	100551481	100551909	100552008	10030	5,1	5,18	0,0	18,7	124	99	0.000920062	0.0356122	0.444,0.042	0.0,0.0	0.243
10049	ENSMUSG00000023021.15	Cers5	chr15	-	99739264	99739730	99739264	99739512	99745888	99745946	10049	18,29	6,8	9,11	0,0	198	99	5.73626e-06	0.000593236	0.6,0.644	1.0,1.0	-0.378
10050	ENSMUSG00000023021.15	Cers5	chr15	-	99739264	99739730	99739264	99739512	99751235	99751341	10050	1,0	2,2	9,14	0,0	198	99	4.92758e-09	1.23802e-06	0.2,0.0	1.0,1.0	-0.9
10122	ENSMUSG00000023755.10	Rhebl1	chr15	-	98878452	98878604	98878452	98878534	98879258	98879315	10122	9,10	0,1	13,6	5,1	169	99	0.00136575	0.0477474	1.0,0.854	0.604,0.779	0.236
10248	ENSMUSG00000062906.12	Hdac10	chr15	-	89125496	89125749	89125496	89125737	89125825	89125890	10248	51,77	0,0	24,28	1,6	111	99	0.000308462	0.0157489	1.0,1.0	0.955,0.806	0.119
10581	ENSMUSG00000116024.1	Gm49527	chr15	+	76888230	76888347	76888233	76888347	76881111	76881238	10581	73130	9,14	56,38	21,18	102	99	1.45957e-05	0.00131658	0.887,0.9	0.721,0.672	0.197
10589	ENSMUSG00000033762.8	Recql4	chr15	-	76706158	76706338	76706158	76706292	76706416	76706605	10589	27,49	1,7	20,9	0,0	145	99	0.000735839	0.0301037	0.949,0.827	1.0,1.0	-0.112
10615	ENSMUSG00000024327.16	Slc39a7	chr17	-	34030592	34031082	34030592	34030734	34031547	34031682	10615	67145	11,4	94,66	0,1	198	99	7.83539e-05	0.0053938	0.753,0.948	1.0,0.971	-0.135
10746	ENSMUSG00000072501.5	Phf20l1	chr15	+	66604745	66605197	66604776	66605197	66604161	66604240	10746	7,12	77121	27,26	19,22	130	99	0	0	0.065,0.07	0.52,0.474	-0.429
10756	ENSMUSG00000015002.18	Efr3a	chr15	+	65853892	65854106	65853920	65854106	65853530	65853606	10756	5,8	0,0	40,21	2,9	127	99	0.000344495	0.0171745	1.0,1.0	0.94,0.645	0.208
10830	ENSMUSG00000022312.11	Eif3h	chr15	-	51799191	51799359	51799191	51799354	51865325	51865523	10830	0,0	2,4	4,3	2,3	104	99	7.50502e-07	0.000107315	0.0,0.0	0.656,0.488	-0.572
10922	ENSMUSG00000022270.16	Retreg1	chr15	+	25941061	25941243	25941125	25941243	25940886	25940950	10922	6,4	0,0	54,55	14,8	163	99	0.000130881	0.00800588	1.0,1.0	0.701,0.807	0.246
11136	ENSMUSG00000091509.7	Gm17066	chr14	-	105113468	105113527	105113468	105113524	105114119	105114676	11136	34,48	9,7	7,4	0,0	102	99	0.000304277	0.015643	0.786,0.869	1.0,1.0	-0.172
11165	ENSMUSG00000022111.9	Uchl3	chr14	+	101694763	101695217	101695158	101695217	101666991	101667077	11165	78130	0,0	36,50	15,2	198	99	6.0726e-07	9.09254e-05	1.0,1.0	0.545,0.926	0.264
11220	ENSMUSG00000022010.19	Tsc22d1	chr14	+	76437665	76437815	76437780	76437815	76418965	76419009	11220	9,12	0,9	1,1	0,0	198	99	0.000678934	0.0282577	1.0,0.4	1.0,1.0	-0.3
11256	ENSMUSG00000022000.11	Zc3h13	chr14	+	75291568	75291694	75291571	75291694	75287487	75287651	11256	7,3	3,2	3,3	0,0	102	99	0.0002936	0.0152172	0.694,0.593	1.0,1.0	-0.357
11318	ENSMUSG00000022098.10	Bmp1	chr14	-	70492075	70492490	70492075	70492271	70492778	70492895	11318	13,24	6,4	9,10	0,0	198	99	8.61754e-06	0.000839154	0.52,0.75	1.0,1.0	-0.365
11387	ENSMUSG00000031109.16	Enox2	chrX	-	49018782	49018894	49018782	49018891	49023126	49023201	11387	7,7	5,2	4,2	0,0	102	99	3.14487e-05	0.0025474	0.576,0.773	1.0,1.0	-0.326
11451	ENSMUSG00000114942.1	Gm49361	chr14	-	57643081	57643489	57643081	57643223	57648418	57648524	11451	43,57	107130	45,35	35,31	198	99	3.51648e-06	0.000398217	0.167,0.18	0.391,0.361	-0.203
11634	ENSMUSG00000004562.16	Arhgef40	chr14	+	51987115	51987536	51987405	51987536	51984970	51984991	11634	3,13	4,1	4,5	0,0	198	99	0.000179273	0.0103268	0.273,0.867	1.0,1.0	-0.43
11985	ENSMUSG00000025290.17	Rps24	chr14	+	24495433	24495845	24495774	24495845	24494051	24494069	11985	101156	129254	89,87	304295	198	99	5.14111e-08	1.0377e-05	0.281,0.235	0.128,0.129	0.13
11988	ENSMUSG00000063506.14	Arhgap22	chr14	+	33363216	33363349	33363275	33363349	33362442	33362523	11988	2,3	2,2	2,4	0,0	158	99	8.62808e-05	0.00579593	0.385,0.485	1.0,1.0	-0.565
12006	ENSMUSG00000039308.6	Ndst2	chr14	-	20728072	20728290	20728072	20728258	20728450	20728688	12006	2,0	1,2	1,1	0,0	131	99	0.000378592	0.0184403	0.602,0.0	1.0,1.0	-0.699
12034	ENSMUSG00000021816.11	Ppp3cb	chr14	-	20523778	20524091	20523778	20523856	20524356	20524502	12034	2,9	4,1	7,6	0,0	198	99	6.48884e-05	0.00461694	0.2,0.818	1.0,1.0	-0.491
12035	ENSMUSG00000021816.11	Ppp3cb	chr14	-	20523778	20524095	20523778	20523856	20524356	20524502	12035	3,9	4,1	8,7	0,0	198	99	6.76333e-05	0.00477405	0.273,0.818	1.0,1.0	-0.455
12036	ENSMUSG00000021816.11	Ppp3cb	chr14	-	20523778	20524127	20523778	20523856	20524356	20524502	12036	1,5	4,1	7,6	0,0	198	99	6.95097e-06	0.000698418	0.111,0.714	1.0,1.0	-0.588
12056	ENSMUSG00000048154.17	Kmt2d	chr15	-	98854182	98854424	98854182	98854403	98854530	98854615	12056	27,22	6,4	17,12	0,1	120	99	0.000923867	0.0356945	0.788,0.819	1.0,0.908	-0.15
12141	ENSMUSG00000033111.16	3830406C13Rik	chr14	+	12301398	12301488	12301401	12301488	12301147	12301246	12141	3,8	0,1	6,4	2,4	102	99	0.0011514	0.0422053	1.0,0.886	0.744,0.493	0.325
12181	ENSMUSG00000094870.8	Zfp131	chr13	-	119789643	119789876	119789643	119789872	119790148	119790738	12181	0,1	2,4	2,5	3,1	103	99	0.000336384	0.0169028	0.0,0.194	0.391,0.828	-0.512
12351	ENSMUSG00000052485.7	Tmem171	chr13	-	98686234	98686519	98686234	98686516	98688347	98688483	12351	12,21	6,6	32,17	0,1	102	99	6.47678e-06	0.000662121	0.66,0.773	1.0,0.943	-0.255
12424	ENSMUSG00000069184.4	Zfp72	chr13	-	74376435	74376562	74376435	74376519	74378611	74378866	12424	24,32	5,5	5,2	0,0	142	99	0.000376441	0.0183758	0.77,0.817	1.0,1.0	-0.207
12428	ENSMUSG00000021576.6	Pdcd6	chr13	-	74303721	74304164	74303721	74304038	74305540	74305838	12428	1,0	0,3	1,3	0,0	198	99	0.000246191	0.0133283	1.0,0.0	1.0,1.0	-0.5
12470	ENSMUSG00000058331.15	Zfp85	chr13	-	67749481	67749722	67749481	67749583	67751609	67751705	12470	16,19	4,2	7,6	0,0	198	99	0.0001241	0.00768622	0.667,0.826	1.0,1.0	-0.254
12502	ENSMUSG00000021514.18	Zfp369	chr13	+	65303769	65304221	65303817	65304221	65280261	65280388	12502	2,2	0,0	2,0	0,6	147	99	0.00105079	0.0393009	1.0,1.0	1.0,0.0	0.5
12590	ENSMUSG00000021495.10	Fam193b	chr13	-	55552961	55553349	55552961	55553228	55554216	55554448	12590	70110	8,12	32,22	11,15	198	99	0.000117987	0.00741746	0.814,0.821	0.593,0.423	0.309
12592	ENSMUSG00000021495.10	Fam193b	chr13	-	55564519	55564580	55564519	55564575	55569704	55571120	12592	14,34	0,1	22,17	2,5	104	99	0.00110321	0.0408152	1.0,0.97	0.913,0.764	0.146
12593	ENSMUSG00000021495.10	Fam193b	chr13	-	55569704	55569897	55569704	55569880	55570774	55571100	12593	2,3	0,0	2,0	2,1	116	99	0.000828125	0.0330285	1.0,1.0	0.46,0.0	0.77
12727	ENSMUSG00000057531.14	Dtnbp1	chr13	-	44930995	44931192	44930995	44931151	44970045	44970178	12727	25,31	7,7	16,16	39,34	140	99	1.0824e-10	3.88179e-08	0.716,0.758	0.225,0.25	0.499
12810	ENSMUSG00000033128.9	Gga1	chr15	+	78891913	78892086	78891950	78892086	78889719	78889868	12810	0,0	1,1	1,3	0,0	136	99	7.04883e-09	1.72232e-06	0.0,0.0	1.0,1.0	-1
12978	ENSMUSG00000024236.18	Svil	chr18	+	5046594	5046877	5046827	5046877	5040227	5040239	12978	20,23	0,0	15,6	6,1	198	99	3.53231e-06	0.000398685	1.0,1.0	0.556,0.75	0.347
12980	ENSMUSG00000024236.18	Svil	chr18	+	5046763	5046915	5046827	5046915	5040227	5040239	12980	19,24	0,0	9,5	6,1	163	99	2.37672e-06	0.00028412	1.0,1.0	0.477,0.752	0.385
12982	ENSMUSG00000024236.18	Svil	chr18	+	5054014	5054098	5054017	5054098	5048884	5049494	12982	2,13	4,8	1,6	0,1	102	99	0.000586163	0.0255788	0.327,0.612	1.0,0.853	-0.457
13069	ENSMUSG00000002799.6	Jag2	chr12	-	112915604	112915960	112915604	112915718	112916333	112916447	13069	37,61	7,2	16,15	0,0	198	99	0.000425528	0.0201097	0.725,0.938	1.0,1.0	-0.169
13102	ENSMUSG00000021286.8	Zfyve21	chr12	+	111827542	111827685	111827545	111827685	111825578	111825632	13102	9,15	1,5	4,3	0,0	102	99	0.000299956	0.0154566	0.897,0.744	1.0,1.0	-0.179
13139	ENSMUSG00000017843.14	Ppp2r5c	chr12	+	110449529	110450999	110450692	110450999	110447971	110448037	13139	10,28	1,0	13,6	4,4	198	99	3.2885e-05	0.00263494	0.833,1.0	0.619,0.429	0.392
13177	ENSMUSG00000084883.2	Ccdc85c	chr12	-	108211514	108211622	108211514	108211619	108221708	108221782	13177	165216	36,59	127113	90,68	102	99	7.46912e-08	1.43789e-05	0.816,0.78	0.578,0.617	0.201
13242	ENSMUSG00000051166.10	Eml5	chr12	-	98876126	98876312	98876126	98876254	98880810	98880879	13242	8,14	1,5	6,3	0,0	157	99	9.77786e-05	0.00638504	0.835,0.638	1.0,1.0	-0.264
13408	ENSMUSG00000039218.17	Srrm2	chr17	+	23811816	23812077	23811827	23812077	23811671	23811731	13408	46,65	0,0	46,26	0,8	110	99	0.000472375	0.0218136	1.0,1.0	1.0,0.745	0.127
13564	ENSMUSG00000060073.9	Psma3	chr12	+	70984437	70984594	70984496	70984594	70983323	70983442	13564	30,48	10,23	27,32	32,44	158	99	9.26944e-05	0.0061341	0.653,0.567	0.346,0.313	0.28
13571	ENSMUSG00000060073.9	Psma3	chr12	+	70984647	70984745	70984652	70984745	70984492	70984594	13571	0,0	6,11	3,2	5,2	104	99	9.2137e-05	0.00612437	0.0,0.0	0.364,0.488	-0.426
13632	ENSMUSG00000021000.17	Mia2	chr12	+	59162882	59163019	59162925	59163019	59160175	59160266	13632	3,8	4,4	3,3	0,0	142	99	7.81363e-07	0.00011066	0.343,0.582	1.0,1.0	-0.537
13633	ENSMUSG00000021000.17	Mia2	chr12	+	59162921	59163019	59162925	59163019	59160175	59160266	13633	4,7	4,4	3,3	0,0	103	99	5.47163e-06	0.000571438	0.49,0.627	1.0,1.0	-0.442
13668	ENSMUSG00000035021.13	Baz1a	chr12	-	54923039	54923471	54923039	54923264	54927563	54927713	13668	8,8	11,23	0,1	13,8	198	99	9.47737e-05	0.00622539	0.267,0.148	0.0,0.059	0.178
13670	ENSMUSG00000035021.13	Baz1a	chr12	-	54923384	54923640	54923384	54923471	54927563	54927713	13670	15,19	2,5	10,6	0,0	198	99	5.02022e-05	0.00373952	0.789,0.655	1.0,1.0	-0.278
14063	ENSMUSG00000037486.18	Asxl2	chr12	+	3469299	3469593	3469516	3469593	3457061	3457209	14063	37,48	4,6	33,33	1,0	198	99	0.000319469	0.0161624	0.822,0.8	0.943,1.0	-0.161
14093	ENSMUSG00000039307.16	Hexdc	chr11	+	121221262	121221590	121221500	121221590	121221082	121221161	14093	6,7	5,9	2,2	0,0	198	99	1.91713e-06	0.000242892	0.375,0.28	1.0,1.0	-0.672
14095	ENSMUSG00000039307.16	Hexdc	chr11	+	121221292	121221590	121221500	121221590	121221082	121221161	14095	8,9	5,9	3,3	0,0	198	99	2.06657e-06	0.000255989	0.444,0.333	1.0,1.0	-0.611
14096	ENSMUSG00000039307.16	Hexdc	chr11	+	121221307	121221590	121221500	121221590	121221082	121221161	14096	7,7	5,9	3,3	0,0	198	99	9.15357e-07	0.000127605	0.412,0.28	1.0,1.0	-0.654
14150	ENSMUSG00000042988.10	Notum	chr11	-	120656331	120656672	120656331	120656432	120657492	120657595	14150	2,4	5,5	3,1	0,0	198	99	1.26891e-08	2.95436e-06	0.167,0.286	1.0,1.0	-0.774
14189	ENSMUSG00000062825.15	Actg1	chr11	-	120347084	120347536	120347084	120347370	120347635	120347875	14189	12,40	9,12	1,2	5,6	198	99	0.000254622	0.0136138	0.4,0.625	0.091,0.143	0.395
14200	ENSMUSG00000061306.16	Slc38a10	chr11	-	120110837	120111005	120110837	120111000	120128422	120128529	14200	3,0	2,5	1,2	0,0	104	99	4.04209e-07	6.46588e-05	0.588,0.0	1.0,1.0	-0.706
14456	ENSMUSG00000018858.15	Mrpl58	chr11	+	115409980	115410251	115410059	115410251	115403781	115403960	14456	16,34	0,0	11,13	4,2	178	99	1.79819e-05	0.00158347	1.0,1.0	0.605,0.783	0.306
14554	ENSMUSG00000020691.13	Mettl2	chr11	+	105128740	105129075	105128855	105129075	105126478	105127441	14554	18,31	3,4	20,14	0,0	198	99	0.000183878	0.0105374	0.75,0.795	1.0,1.0	-0.228
14575	ENSMUSG00000020687.13	Cdc27	chr11	-	104528262	104528490	104528262	104528377	104528577	104528732	14575	0,0	1,1	1,2	1,0	198	99	0.000555871	0.0246456	0.0,0.0	0.333,1.0	-0.666
14690	ENSMUSG00000019303.14	Psmc3ip	chr11	-	101093680	101093814	101093680	101093786	101094935	101095025	14690	4,14	0,2	1,0	2,1	127	99	3.36303e-05	0.00268018	1.0,0.845	0.28,0.0	0.782
14696	ENSMUSG00000017801.15	Mlx	chr11	+	101088247	101088704	101088597	101088704	101087753	101087790	14696	4,11	36,55	8,15	9,2	198	99	0.000130366	0.00798538	0.053,0.091	0.308,0.789	-0.476
14698	ENSMUSG00000017801.15	Mlx	chr11	+	101088251	101088704	101088597	101088704	101087753	101087790	14698	5,11	36,55	8,11	9,2	198	99	0.000257518	0.013714	0.065,0.091	0.308,0.733	-0.442
14938	ENSMUSG00000018381.15	Abi3	chr11	-	95833639	95833800	95833639	95833797	95834002	95834098	14938	3,4	3,2	1,1	0,0	102	99	6.0824e-05	0.00440529	0.493,0.66	1.0,1.0	-0.423
14972	ENSMUSG00000020863.15	Luc7l3	chr11	-	94292773	94293055	94292773	94293027	94293137	94293278	14972	1,0	3,2	2,8	2,2	127	99	0.000172317	0.00999078	0.206,0.0	0.438,0.757	-0.495
14995	ENSMUSG00000091228.1	Gm20390	chr11	-	93954819	93955222	93954819	93955192	93955494	93955624	14995	0,3	1,6	4,3	0,1	129	99	4.72699e-05	0.00356287	0.0,0.277	1.0,0.697	-0.71
15131	ENSMUSG00000073423.10	Zfp414	chr17	+	33629518	33629698	33629624	33629698	33629120	33629216	15131	3,4	2,2	3,1	0,0	198	99	0.000106901	0.00686889	0.429,0.5	1.0,1.0	-0.535
15294	ENSMUSG00000041958.10	Pigs	chr11	+	78328733	78329086	78328974	78329086	78328414	78328508	15294	11,15	14,7	9,11	0,0	198	99	6.96412e-08	1.35238e-05	0.282,0.517	1.0,1.0	-0.601
15341	ENSMUSG00000002059.18	Rab34	chr11	+	78191211	78191455	78191364	78191455	78190684	78190736	15341	17,39	2,7	35,17	0,0	198	99	1.62107e-05	0.0014389	0.81,0.736	1.0,1.0	-0.227
15388	ENSMUSG00000020840.10	Blmh	chr11	+	76949959	76951185	76951043	76951185	76945820	76946258	15388	29,37	0,7	18,18	0,0	198	99	0.000728019	0.0298662	1.0,0.725	1.0,1.0	-0.137
15535	ENSMUSG00000018442.13	Derl2	chr11	-	71018311	71018586	71018311	71018517	71019143	71019303	15535	0,2	2,1	6,1	0,1	168	99	0.000416583	0.0198032	0.0,0.541	1.0,0.371	-0.415
15559	ENSMUSG00000040667.11	Nup88	chr11	-	70945202	70945358	70945202	70945353	70947701	70948815	15559	3,1	4,2	1,1	0,0	104	99	3.94087e-06	0.000437034	0.417,0.322	1.0,1.0	-0.631
15619	ENSMUSG00000020886.17	Dlg4	chr11	+	70030554	70030654	70030603	70030654	70030398	70030452	15619	14,29	16,17	21,19	80,57	148	99	2.52339e-05	0.00210999	0.369,0.533	0.149,0.182	0.286
15621	ENSMUSG00000020886.17	Dlg4	chr11	+	70030597	70030654	70030603	70030654	70030398	70030452	15621	13,16	16,17	15,18	80,57	105	99	0.000146886	0.00877959	0.434,0.47	0.15,0.229	0.262
15655	ENSMUSG00000047284.14	Neurl4	chr11	+	69906709	69906884	69906729	69906884	69906517	69906603	15655	15,21	1,2	5,13	6,7	119	99	0.000228831	0.0125476	0.926,0.897	0.409,0.607	0.403
15669	ENSMUSG00000019461.12	Plscr3	chr11	+	69846907	69847075	69846993	69847075	69846616	69846691	15669	224351	26,57	90,85	6,1	185	99	0.000115317	0.00728431	0.822,0.767	0.889,0.978	-0.139
15738	ENSMUSG00000020894.16	Vamp2	chr11	+	69089575	69089889	69089730	69089889	69089105	69089226	15738	12,14	40,36	46,51	24,15	198	99	6.55922e-10	1.99787e-07	0.13,0.163	0.489,0.63	-0.413
15745	ENSMUSG00000020898.18	Ctc1	chr11	+	69033366	69033541	69033390	69033541	69033182	69033271	15745	188290	12,17	110111	22,19	123	99	4.27588e-05	0.00327251	0.927,0.932	0.801,0.825	0.117
15831	ENSMUSG00000010025.19	Aldh3a2	chr11	-	61262218	61262427	61262218	61262345	61264245	61264331	15831	65,69	8,1	57,61	0,0	181	99	0.00031032	0.0158075	0.816,0.974	1.0,1.0	-0.105
15881	ENSMUSG00000000538.18	Tom1l2	chr11	-	60231100	60231559	60231100	60231137	60241817	60241893	15881	4,5	3,6	0,1	8,10	198	99	3.67471e-05	0.00288209	0.4,0.294	0.0,0.048	0.323
15936	ENSMUSG00000036819.14	Jmjd4	chr11	+	59453808	59454059	59453827	59454059	59453510	59453645	15936	11,19	6,13	1,0	2,2	118	99	0.000566535	0.0249938	0.606,0.551	0.296,0.0	0.43
15943	ENSMUSG00000048076.14	Arf1	chr11	-	59212820	59213052	59212820	59212930	59213142	59213253	15943	0,0	7,3	7,7	1,5	198	99	3.47401e-07	5.6822e-05	0.0,0.0	0.778,0.412	-0.595
16372	ENSMUSG00000049811.16	Fam161a	chr11	+	23015654	23015884	23015658	23015884	23008346	23008631	16372	2,6	0,1	1,4	5,1	103	99	0.0011395	0.0419136	1.0,0.852	0.161,0.794	0.448
16439	ENSMUSG00000022533.14	Atp13a3	chr16	-	30333723	30333960	30333723	30333835	30336189	30336262	16439	66121	0,3	38,48	2,9	198	99	0.000375277	0.0183593	1.0,0.953	0.905,0.727	0.16
16447	ENSMUSG00000022533.14	Atp13a3	chr16	-	30338431	30338835	30338431	30338541	30339612	30339692	16447	2,2	0,0	10,5	4,3	198	99	4.89898e-06	0.000521191	1.0,1.0	0.556,0.455	0.494
16449	ENSMUSG00000022533.14	Atp13a3	chr16	-	30338431	30338896	30338431	30338541	30339612	30339692	16449	4,2	0,0	10,5	4,3	198	99	4.27305e-06	0.000466886	1.0,1.0	0.556,0.455	0.494
16524	ENSMUSG00000020471.11	Pold2	chr11	-	5873026	5873503	5873026	5873500	5873688	5873769	16524	22,21	4,5	26,11	0,1	102	99	0.000654163	0.027444	0.842,0.803	1.0,0.914	-0.135
16634	ENSMUSG00000020430.12	Pes1	chr11	+	3977651	3977783	3977685	3977783	3977015	3977200	16634	1,2	1,0	1,0	1,1	133	99	0.000114168	0.00723228	0.427,1.0	0.427,0.0	0.5
16662	ENSMUSG00000023764.18	Sfi1	chr11	-	3136945	3137126	3136945	3137106	3140136	3140233	16662	8,8	26,44	3,0	48,24	119	99	0.000480612	0.0220566	0.204,0.131	0.049,0.0	0.143
16669	ENSMUSG00000017548.15	Suz12	chr11	+	80024895	80025311	80025167	80025311	80022091	80022269	16669	18,11	0,1	13,7	10,4	198	99	1.01702e-06	0.000140457	1.0,0.846	0.394,0.467	0.493
16900	ENSMUSG00000006731.10	B4galnt1	chr10	+	127169708	127170168	127169977	127170168	127167700	127167881	16900	11,25	0,0	1,3	1,2	198	99	0.00121646	0.0438025	1.0,1.0	0.333,0.429	0.619
16903	ENSMUSG00000006728.12	Cdk4	chr10	+	127064076	127064343	127064204	127064343	127063615	127063759	16903	5,1	1,0	0,1	4,0	198	99	0.000428237	0.0201734	0.714,1.0	0.0,1.0	0.357
16962	ENSMUSG00000034667.8	Xpot	chr10	-	121614990	121615124	121614990	121615102	121616614	121616684	16962	9,2	3,5	2,1	0,0	121	99	5.34423e-06	0.000563171	0.711,0.247	1.0,1.0	-0.521
16963	ENSMUSG00000034667.8	Xpot	chr10	-	121614990	121615147	121614990	121615102	121616614	121616684	16963	21,62	3,5	17,24	0,0	144	99	0.000855969	0.0338957	0.828,0.895	1.0,1.0	-0.139
16964	ENSMUSG00000034667.8	Xpot	chr10	-	121614990	121615217	121614990	121615102	121616614	121616684	16964	52,64	3,5	16,10	0,0	198	99	0.00135426	0.0474951	0.897,0.865	1.0,1.0	-0.119
17012	ENSMUSG00000020225.10	Tmbim4	chr10	+	120224633	120224739	120224665	120224739	120223836	120223882	17012	1,4	3,2	1,1	0,0	131	99	5.47409e-06	0.000571438	0.201,0.602	1.0,1.0	-0.599
17021	ENSMUSG00000060181.6	Slc35e3	chr10	-	117744727	117744995	117744727	117744844	117745784	117746365	17021	107156	2,0	47,23	4,2	198	99	0.0013705	0.0478761	0.964,1.0	0.855,0.852	0.129
17041	ENSMUSG00000020171.8	Yeats4	chr10	-	117215427	117215918	117215427	117215830	117217211	117217358	17041	2,2	0,1	0,2	2,1	187	99	0.000550854	0.024521	1.0,0.514	0.0,0.514	0.5
17046	ENSMUSG00000020171.8	Yeats4	chr10	-	117217211	117217497	117217211	117217299	117220332	117220455	17046	5,4	0,0	1,2	5,3	198	99	1.03786e-10	3.78308e-08	1.0,1.0	0.091,0.25	0.83
17047	ENSMUSG00000020171.8	Yeats4	chr10	-	117217211	117217543	117217211	117217299	117220332	117220455	17047	4,4	0,0	2,3	5,3	198	99	1.7417e-09	4.93327e-07	1.0,1.0	0.167,0.333	0.75
17069	ENSMUSG00000020166.15	Cnot2	chr10	-	116549032	116549173	116549032	116549105	116581452	116581511	17069	136197	46,57	108107	16,15	167	99	0.000850119	0.0337543	0.637,0.672	0.8,0.809	-0.15
17119	ENSMUSG00000020189.14	Osbpl8	chr10	+	111233524	111233690	111233561	111233690	111224671	111224708	17119	0,1	6,15	3,9	18,21	136	99	0.000640074	0.0271604	0.0,0.046	0.108,0.238	-0.15
17196	ENSMUSG00000021024.14	Psma6	chr12	+	55418280	55418310	55418283	55418310	55414403	55414498	17196	3,5	4,5	6,7	1,0	102	99	3.24574e-05	0.00261482	0.421,0.493	0.853,1.0	-0.47
17285	ENSMUSG00000019961.17	Tmpo	chr10	-	91153084	91153342	91153084	91153180	91158747	91158845	17285	17,17	93134	6,15	11,20	198	99	7.93791e-05	0.00543075	0.084,0.06	0.214,0.273	-0.171
17286	ENSMUSG00000019961.17	Tmpo	chr10	-	91153084	91153384	91153084	91153180	91158747	91158845	17286	15,13	93134	9,15	11,20	198	99	6.92756e-07	0.000101313	0.075,0.046	0.29,0.273	-0.221
17343	ENSMUSG00000040312.14	Cchcr1	chr17	+	35527937	35528181	35528006	35528181	35526608	35526715	17343	0,0	3,6	2,1	0,0	168	99	7.18369e-10	2.15851e-07	0.0,0.0	1.0,1.0	-1
17520	ENSMUSG00000062075.13	Lmnb2	chr10	-	80902797	80903283	80902797	80902900	80903449	80903569	17520	15,26	0,7	7,4	0,0	198	99	0.00059842	0.0259121	1.0,0.65	1.0,1.0	-0.175
17581	ENSMUSG00000020190.13	Mknk2	chr10	-	80669629	80670025	80669629	80669703	80671558	80671656	17581	33,44	0,2	55,39	25,14	198	99	4.88872e-09	1.23524e-06	1.0,0.917	0.524,0.582	0.406
17594	ENSMUSG00000003344.14	Btbd2	chr10	-	80643825	80644023	80643825	80644003	80644261	80644349	17594	2,0	1,2	2,1	0,0	119	99	0.000623274	0.0265998	0.625,0.0	1.0,1.0	-0.688
17615	ENSMUSG00000035370.9	Gm49322	chr10	+	80609212	80609424	80609391	80609424	80608802	80608850	17615	48,66	9,10	24,11	0,0	198	99	1.03564e-05	0.000977813	0.727,0.767	1.0,1.0	-0.253
17618	ENSMUSG00000035370.9	Gm49322	chr10	+	80609300	80609424	80609391	80609424	80608802	80608850	17618	48,68	9,10	22,11	0,0	190	99	1.4734e-05	0.00132368	0.735,0.78	1.0,1.0	-0.242
17622	ENSMUSG00000035370.9	Gm49322	chr10	+	80609334	80609424	80609391	80609424	80608802	80608850	17622	48,65	9,10	24,11	0,0	156	99	1.56563e-05	0.00139807	0.772,0.805	1.0,1.0	-0.212
17718	ENSMUSG00000003068.16	Stk11	chr10	+	80126074	80126369	80126232	80126369	80116617	80116907	17718	33,28	0,0	62,61	4,6	198	99	0.00016674	0.00970541	1.0,1.0	0.886,0.836	0.139
17722	ENSMUSG00000003068.16	Stk11	chr10	+	80125967	80126369	80126232	80126369	80125478	80125568	17722	45,37	20,16	74,78	14,9	198	99	0.000642529	0.0271751	0.529,0.536	0.725,0.812	-0.236
17726	ENSMUSG00000003068.16	Stk11	chr10	+	80126045	80126369	80126232	80126369	80125478	80125568	17726	33,30	20,16	61,65	14,9	198	99	0.000396955	0.0191668	0.452,0.484	0.685,0.783	-0.266
17727	ENSMUSG00000003068.16	Stk11	chr10	+	80126074	80126369	80126232	80126369	80125478	80125568	17727	38,39	20,16	66,68	14,9	198	99	0.00143838	0.0496235	0.487,0.549	0.702,0.791	-0.228
17879	ENSMUSG00000034248.7	Slc25a37	chr14	-	69247580	69247649	69247580	69247637	69249393	69249622	17879	2,9	16,19	17,10	4,7	111	99	0.000133494	0.00810994	0.1,0.297	0.791,0.56	-0.477
18119	ENSMUSG00000005625.15	Psmd4	chr3	-	95041811	95042007	95041811	95041872	95042507	95042614	18119	5,5	1,0	0,4	2,3	198	99	9.46377e-05	0.00622539	0.714,1.0	0.0,0.4	0.657
18154	ENSMUSG00000051950.10	B3glct	chr5	+	149695851	149696042	149695980	149696042	149678229	149678379	18154	3,0	5,4	21,8	4,5	198	99	0.000695226	0.028733	0.231,0.0	0.724,0.444	-0.468
18179	ENSMUSG00000062012.14	Zfp13	chr17	-	23581056	23581395	23581056	23581225	23585437	23585574	18179	44,59	8,0	22,14	0,0	198	99	0.00124636	0.0445902	0.733,1.0	1.0,1.0	-0.133
18218	ENSMUSG00000024556.4	Me2	chr18	-	73773129	73773599	73773129	73773228	73775378	73775449	18218	32,40	8501181	174176	684607	198	99	0	0	0.018,0.017	0.113,0.127	-0.102
18223	ENSMUSG00000024556.4	Me2	chr18	-	73773129	73773510	73773129	73773252	73775378	73775449	18223	0,1	2,0	1,2	0,0	198	99	0.00119564	0.0431926	0.0,1.0	1.0,1.0	-0.5
18348	ENSMUSG00000029253.12	Cenpc1	chr5	-	86060524	86060896	86060524	86060553	86062003	86062047	18348	24,26	43,31	47,43	7,11	198	99	6.30875e-10	1.96189e-07	0.218,0.295	0.77,0.662	-0.459
18771	ENSMUSG00000037313.16	Tacc3	chr5	+	33663824	33664283	33664266	33664283	33661520	33661645	18771	2,13	0,0	4,3	2,5	198	99	2.91665e-08	6.26586e-06	1.0,1.0	0.5,0.231	0.635
18772	ENSMUSG00000037313.16	Tacc3	chr5	+	33663834	33664283	33664266	33664283	33661520	33661645	18772	2,12	0,0	6,3	2,5	198	99	2.05821e-07	3.63208e-05	1.0,1.0	0.6,0.231	0.585
18793	ENSMUSG00000079562.7	Maea	chr5	+	33362653	33362817	33362725	33362817	33360369	33360555	18793	10,12	7,5	12,5	0,0	171	99	6.93533e-07	0.000101313	0.453,0.581	1.0,1.0	-0.483
18796	ENSMUSG00000017210.14	Med24	chr11	-	98706825	98707296	98706825	98706916	98707536	98707801	18796	4,4	2,5	4,3	0,0	198	99	6.95291e-08	1.35238e-05	0.5,0.286	1.0,1.0	-0.607
18887	ENSMUSG00000062822.8	4833420G17Rik	chr13	+	119466018	119466304	119466073	119466304	119464564	119464690	18887	11,18	1,10	14,13	0,0	154	99	1.66278e-05	0.00147299	0.876,0.536	1.0,1.0	-0.294
18998	ENSMUSG00000024845.17	Tmem134	chr19	+	4130856	4131075	4131059	4131075	4127759	4127836	18998	66115	4,8	62,56	0,0	198	99	6.59205e-05	0.00466797	0.892,0.878	1.0,1.0	-0.115
19011	ENSMUSG00000045934.15	Mtmr11	chr3	+	96168561	96168765	96168645	96168765	96168072	96168143	19011	7,6	1,5	0,1	3,2	183	99	0.000201248	0.0113428	0.791,0.394	0.0,0.213	0.486
19070	ENSMUSG00000109378.1	Gm49396	chr7	+	30563531	30563619	30563556	30563619	30563354	30563399	19070	130166	16,23	53,45	18,19	124	99	0.000168599	0.009788	0.866,0.852	0.702,0.654	0.181
19160	ENSMUSG00000026988.15	Wdsub1	chr2	-	59878129	59878587	59878129	59878550	59882411	59882547	19160	16,21	4,6	10,15	0,1	136	99	0.000411716	0.0196238	0.744,0.718	1.0,0.916	-0.227
19225	ENSMUSG00000029036.18	Atad3a	chr4	-	155748670	155748988	155748670	155748826	155749156	155749343	19225	2,3	1,3	0,0	2,3	198	99	0.000265465	0.0139872	0.5,0.333	0.0,0.0	0.416
19338	ENSMUSG00000049580.12	Tsku	chr7	-	98360020	98360298	98360020	98360158	98361241	98361288	19338	3,5	6,14	0,0	1,1	198	99	0.000988468	0.0373468	0.2,0.152	0.0,0.0	0.176
19340	ENSMUSG00000049580.12	Tsku	chr7	-	98360020	98360301	98360020	98360298	98361241	98361288	19340	4,7	3,5	2,2	0,0	102	99	2.98853e-05	0.00243407	0.564,0.576	1.0,1.0	-0.43
19811	ENSMUSG00000003038.15	Hmgn2	chr4	-	133965598	133966092	133965598	133966043	133966428	133967908	19811	65,78	5,6	48,29	0,0	148	99	0.000232388	0.0127113	0.897,0.897	1.0,1.0	-0.103
19851	ENSMUSG00000031570.17	Plpp5	chr8	+	25724056	25724226	25724131	25724226	25722471	25722600	19851	0,0	13,9	1,8	3,6	174	99	8.69566e-06	0.000844314	0.0,0.0	0.159,0.431	-0.295
19949	ENSMUSG00000061894.15	Zscan20	chr4	-	128588015	128588444	128588015	128588441	128589451	128590141	19949	15,19	5,10	7,5	0,1	102	99	0.000608425	0.0261165	0.744,0.648	1.0,0.829	-0.219
20044	ENSMUSG00000023051.11	Tarbp2	chr15	+	102521696	102522044	102521980	102522044	102521137	102521213	20044	2,3	1,0	2,3	3,4	198	99	0.00135916	0.0475547	0.5,1.0	0.25,0.273	0.488
20046	ENSMUSG00000023051.11	Tarbp2	chr15	+	102521726	102522044	102521980	102522044	102521137	102521213	20046	2,3	1,0	2,3	3,4	198	99	0.00135916	0.0475547	0.5,1.0	0.25,0.273	0.488
20060	ENSMUSG00000058317.12	Ube2e2	chr14	-	18893221	18893334	18893221	18893324	18893584	18893776	20060	6,2	0,4	0,0	6,3	109	99	2.13964e-06	0.000263372	1.0,0.312	0.0,0.0	0.656
20062	ENSMUSG00000058317.12	Ube2e2	chr14	-	18893221	18893382	18893221	18893334	18893584	18893776	20062	4,7	6,1	5,1	0,0	147	99	3.17007e-05	0.00256315	0.31,0.825	1.0,1.0	-0.432
20232	ENSMUSG00000033253.18	Szt2	chr4	-	118388543	118388714	118388543	118388644	118388922	118389036	20232	10,10	10,6	3,2	0,0	169	99	8.29327e-06	0.000812339	0.369,0.494	1.0,1.0	-0.569
20375	ENSMUSG00000038712.16	Mindy1	chr3	+	95295299	95295425	95295302	95295425	95294794	95294986	20375	7,19	5,4	16,14	0,0	102	99	1.52693e-05	0.00136901	0.576,0.822	1.0,1.0	-0.301
20383	ENSMUSG00000029290.12	Zfp326	chr5	+	105888433	105888839	105888735	105888839	105886186	105886276	20383	0,3	1,3	5,3	0,0	198	99	4.31835e-06	0.000470679	0.0,0.333	1.0,1.0	-0.834
20477	ENSMUSG00000040808.4	S100g	chrX	-	162961991	162962243	162961991	162962240	162964061	162964205	20477	273364	527743	19,17	109,83	102	99	5.01919e-07	7.57093e-05	0.335,0.322	0.145,0.166	0.173
20520	ENSMUSG00000041203.9	Trir	chr8	+	85029422	85029616	85029538	85029616	85026822	85027234	20520	36,65	11341250	125149	391403	198	99	0	0	0.016,0.025	0.138,0.156	-0.127
20545	ENSMUSG00000024392.17	Bag6	chr17	+	35142559	35142839	35142726	35142839	35142306	35142384	20545	57,78	82131	50,46	177155	198	99	2.53143e-05	0.00210999	0.258,0.229	0.124,0.129	0.117
20699	ENSMUSG00000062937.7	Mtap	chr4	+	89156399	89156613	89156445	89156613	89148188	89148275	20699	14,16	1,2	13,9	26,11	145	99	4.30909e-08	8.9965e-06	0.905,0.845	0.254,0.358	0.569
20704	ENSMUSG00000024991.8	Eif3a	chr19	-	60768707	60768959	60768707	60768890	60769865	60770019	20704	0,0	2,2	2,1	0,0	168	99	1.68575e-09	4.80546e-07	0.0,0.0	1.0,1.0	-1
20824	ENSMUSG00000037876.17	Jmjd1c	chr10	+	67218089	67218181	67218116	67218181	67215269	67215375	20824	27,62	13,21	17,12	25,30	126	99	9.22914e-07	0.000128256	0.62,0.699	0.348,0.239	0.366
20898	ENSMUSG00000038406.17	Scaf1	chr7	-	45013251	45013749	45013251	45013740	45016079	45016363	20898	1,3	0,0	1,1	3,10	108	99	7.90326e-10	2.35878e-07	1.0,1.0	0.234,0.084	0.841
20916	ENSMUSG00000029027.9	Dffb	chr4	-	153971580	153972050	153971580	153971660	153972607	153972678	20916	3,2	0,0	5,2	6,0	198	99	0.00118374	0.0429722	1.0,1.0	0.294,1.0	0.353
20933	ENSMUSG00000039137.18	Whrn	chr4	-	63429085	63429420	63429085	63429417	63431849	63432059	20933	3,5	17,37	0,0	9,11	102	99	0.00114328	0.0420178	0.146,0.116	0.0,0.0	0.131
20984	ENSMUSG00000025967.16	Eef1b2	chr1	+	63178422	63178565	63178438	63178565	63177722	63178208	20984	106183	5,6	181151	71,47	115	99	3.33067e-16	2.64491e-13	0.948,0.963	0.687,0.734	0.245
21060	ENSMUSG00000078994.9	Zfp429	chr13	-	67397262	67397563	67397262	67397370	67399695	67399767	21060	6,14	0,7	13,2	0,0	198	99	0.000410677	0.0195953	1.0,0.5	1.0,1.0	-0.25
21136	ENSMUSG00000057541.14	Pus7	chr5	-	23742343	23742763	23742343	23742430	23743416	23743546	21136	30,41	1,6	18,8	0,0	198	99	0.000587271	0.0255788	0.938,0.774	1.0,1.0	-0.144
21148	ENSMUSG00000028347.14	Tmeff1	chr4	+	48650294	48650418	48650300	48650418	48638979	48639045	21148	594879	224350	313243	231167	105	99	2.73503e-06	0.00032007	0.714,0.703	0.561,0.578	0.139
21202	ENSMUSG00000117284.1	Gm7072	chr17	-	22292407	22292470	22292407	22292455	22313236	22313320	21202	3,13	2,1	3,3	7,10	114	99	0.000193243	0.0109892	0.566,0.919	0.271,0.207	0.503
21287	ENSMUSG00000042354.7	Gnl3	chr14	-	31013166	31013316	31013166	31013255	31013428	31013565	21287	34,33	22,34	23,16	3,5	160	99	0.00115305	0.0422053	0.489,0.375	0.826,0.664	-0.313
21294	ENSMUSG00000042354.7	Gnl3	chr14	-	31013652	31014125	31013652	31014120	31014589	31014677	21294	31,62	4,8	24,30	0,0	104	99	9.68339e-05	0.00634198	0.881,0.881	1.0,1.0	-0.119
21309	ENSMUSG00000028466.15	Creb3	chr4	+	43563256	43563558	43563377	43563558	43563049	43563206	21309	7,3	0,1	1,4	3,1	198	99	0.00116042	0.0423679	1.0,0.6	0.143,0.667	0.395
21443	ENSMUSG00000045917.17	Tmem268	chr4	+	63560881	63560995	63560911	63560995	63560226	63560725	21443	9,23	9,7	2,2	0,0	129	99	4.38271e-05	0.00334304	0.434,0.716	1.0,1.0	-0.425
21449	ENSMUSG00000030327.8	Necap1	chr6	+	122881319	122881582	122881441	122881582	122880657	122880762	21449	1,0	0,2	2,1	0,0	198	99	0.00119564	0.0431926	1.0,0.0	1.0,1.0	-0.5
21506	ENSMUSG00000058006.12	Mdn1	chr4	+	32752030	32752192	32752091	32752192	32751226	32751393	21506	95194	0,3	38,18	9,0	160	99	0.000247887	0.0133296	1.0,0.976	0.723,1.0	0.127
21567	ENSMUSG00000040842.17	Szrd1	chr4	-	141118526	141118801	141118526	141118778	141139691	141139775	21567	88122	112209	66,71	234203	122	99	7.31237e-06	0.000730744	0.389,0.321	0.186,0.221	0.151
21581	ENSMUSG00000034724.18	Cnot6l	chr5	-	96082869	96083097	96082869	96082980	96086141	96086933	21581	126206	3,11	92,92	15,9	198	99	0.00133363	0.04689	0.955,0.904	0.754,0.836	0.135
21680	ENSMUSG00000041354.16	Rgl2	chr17	+	33931884	33932206	33932039	33932206	33931725	33931809	21680	23,26	250400	40,26	131,76	198	99	3.34564e-10	1.09398e-07	0.044,0.031	0.132,0.146	-0.102
21691	ENSMUSG00000041354.16	Rgl2	chr17	+	33935114	33935255	33935154	33935255	33934974	33935007	21691	18,27	8,7	7,10	0,1	139	99	0.000402238	0.0192961	0.616,0.733	1.0,0.877	-0.264
21829	ENSMUSG00000029238.11	Clock	chr5	-	76268383	76268847	76268383	76268467	76273958	76274043	21829	4,5	6,1	3,2	0,0	198	99	2.4346e-06	0.000289986	0.25,0.714	1.0,1.0	-0.518
21854	ENSMUSG00000030660.9	Pik3c2a	chr7	-	116342151	116342486	116342151	116342277	116342810	116342883	21854	7,7	7,2	5,5	0,1	198	99	0.000784823	0.0314992	0.333,0.636	1.0,0.714	-0.372
22080	ENSMUSG00000067931.6	Zfp948	chr17	+	21569015	21569127	21569048	21569127	21567007	21567245	22080	24,29	68106	34,24	28,34	132	99	0.000107038	0.00686889	0.209,0.17	0.477,0.346	-0.222
22142	ENSMUSG00000104610.1	Gm567	chr3	+	137298799	137299293	137299065	137299293	137289638	137289766	22142	6,2	7,12	0,0	4,2	198	99	0.000608019	0.0261165	0.3,0.077	0.0,0.0	0.189
22284	ENSMUSG00000078773.11	Rad54b	chr4	+	11578633	11578957	11578713	11578957	11569820	11569932	22284	8,9	3,15	9,2	0,0	179	99	5.81376e-07	8.73438e-05	0.596,0.249	1.0,1.0	-0.578
22384	ENSMUSG00000004267.16	Eno2	chr6	-	124766221	124766562	124766221	124766327	124767032	124767102	22384	7,4	1,6	6,10	0,0	198	99	8.07312e-06	0.000798741	0.778,0.25	1.0,1.0	-0.486
22385	ENSMUSG00000004267.16	Eno2	chr6	-	124766221	124766659	124766221	124766327	124767032	124767102	22385	7,5	1,6	5,9	0,0	198	99	7.78531e-06	0.000772797	0.778,0.294	1.0,1.0	-0.464
22457	ENSMUSG00000025145.13	Lrrc45	chr11	+	120717640	120717902	120717824	120717902	120717514	120717538	22457	2,13	61,88	9,9	13,16	198	99	2.27487e-05	0.00194171	0.016,0.069	0.257,0.22	-0.196
22479	ENSMUSG00000028614.14	Ndc1	chr4	+	107390224	107390605	107390548	107390605	107389450	107389606	22479	4,8	4,7	4,1	0,0	198	99	1.46315e-06	0.000193075	0.333,0.364	1.0,1.0	-0.651
22500	ENSMUSG00000022779.16	Top3b	chr16	+	16887840	16888005	16887857	16888005	16887576	16887723	22500	3,3	8,7	0,0	1,1	116	99	0.000696363	0.0287532	0.242,0.268	0.0,0.0	0.255
22507	ENSMUSG00000037773.14	Pced1a	chr2	-	130422224	130422632	130422224	130422375	130422812	130422892	22507	39,47	3,12	7,19	0,0	198	99	4.97768e-05	0.00371405	0.867,0.662	1.0,1.0	-0.236
22508	ENSMUSG00000037773.14	Pced1a	chr2	-	130422224	130422659	130422224	130422375	130422812	130422892	22508	39,48	3,12	7,18	0,0	198	99	5.52605e-05	0.00406187	0.867,0.667	1.0,1.0	-0.233
22558	ENSMUSG00000068744.12	Psrc1	chr3	+	108387109	108387395	108387291	108387395	108386499	108386736	22558	0,0	2,4	1,1	0,0	198	99	3.78161e-09	9.77723e-07	0.0,0.0	1.0,1.0	-1
22574	ENSMUSG00000047617.11	Paxx	chr2	-	25460444	25460497	25460444	25460494	25460654	25461023	22574	7,11	36,33	3,3	89,56	102	99	4.58875e-05	0.00346455	0.159,0.244	0.032,0.049	0.161
22878	ENSMUSG00000020580.10	Rock2	chr12	+	16934240	16934346	16934260	16934346	16928933	16929034	22878	10,13	1,4	2,2	0,0	119	99	0.00145271	0.0498471	0.893,0.73	1.0,1.0	-0.189
22893	ENSMUSG00000060166.6	Zdhhc8	chr16	-	18226223	18226566	18226223	18226553	18226645	18226766	22893	5,5	0,1	4,0	4,1	112	99	0.000375906	0.0183698	1.0,0.815	0.469,0.0	0.673
22910	ENSMUSG00000054611.17	Kdm2a	chr19	-	4350185	4350345	4350185	4350305	4351736	4351830	22910	84150	13,22	74,42	2,2	139	99	0.000279662	0.0146618	0.821,0.829	0.963,0.937	-0.125
22952	ENSMUSG00000036275.13	9530068E07Rik	chr11	+	52403049	52403274	52403137	52403274	52396427	52396603	22952	5,1	2,2	8,5	1,0	187	99	0.0001332	0.00810312	0.57,0.209	0.809,1.0	-0.515
22981	ENSMUSG00000038550.10	Ciart	chr3	-	95880982	95881275	95880982	95881058	95882154	95882251	22981	4,11	7,10	18,14	3,4	198	99	0.00140241	0.0486088	0.222,0.355	0.75,0.636	-0.405
22982	ENSMUSG00000038550.10	Ciart	chr3	-	95880982	95881331	95880982	95881058	95882154	95882251	22982	4,11	7,10	18,14	3,4	198	99	0.00140241	0.0486088	0.222,0.355	0.75,0.636	-0.405
23156	ENSMUSG00000036427.5	Gpi1	chr7	-	34229282	34229437	34229282	34229373	34229539	34229794	23156	93123	25,22	231159	336289	163	99	0	0	0.693,0.773	0.295,0.25	0.461
23180	ENSMUSG00000032998.16	Foxj3	chr4	+	119623220	119623412	119623309	119623412	119621600	119621702	23180	97148	4,0	157126	20,11	188	99	3.88164e-06	0.000431541	0.927,1.0	0.805,0.858	0.132
23216	ENSMUSG00000027942.16	4933434E20Rik	chr3	+	90058486	90058651	90058556	90058651	90056528	90056582	23216	5,10	0,6	6,5	0,0	169	99	0.000741341	0.03019	1.0,0.494	1.0,1.0	-0.253
23290	ENSMUSG00000028059.15	Arhgef2	chr3	+	88616349	88616654	88616560	88616654	88615481	88615521	23290	13,11	16,10	9,5	0,1	198	99	1.26952e-05	0.00117128	0.289,0.355	1.0,0.714	-0.535
23477	ENSMUSG00000030761.16	Myo7a	chr7	-	98065611	98065895	98065611	98065781	98066344	98066467	23477	43,71	5,7	59,68	0,2	198	99	0.00040999	0.0195835	0.811,0.835	1.0,0.944	-0.149
23515	ENSMUSG00000023905.15	Tnfrsf12a	chr17	-	23676518	23676678	23676518	23676671	23677326	23677468	23515	28,52	11,6	48,34	0,1	106	99	4.76552e-06	0.000511524	0.704,0.89	1.0,0.969	-0.188
23568	ENSMUSG00000026201.12	Stk16	chr1	+	75212840	75213228	75213053	75213228	75212623	75212733	23568	18,19	2,8	17,14	1,0	198	99	0.000330692	0.0166544	0.818,0.543	0.895,1.0	-0.267
23625	ENSMUSG00000035992.15	Fnip1	chr11	+	54475616	54475766	54475634	54475766	54466086	54466213	23625	2,0	7,19	8,7	13,11	117	99	0.000198645	0.0112389	0.195,0.0	0.342,0.35	-0.248
23647	ENSMUSG00000046836.13	Brox	chr1	-	183292474	183292645	183292474	183292625	183294333	183294450	23647	4,4	4,15	0,1	12,11	119	99	0.000377785	0.0184211	0.454,0.182	0.0,0.07	0.283
23714	ENSMUSG00000024764.10	Naa40	chr19	-	7229721	7230094	7229721	7229805	7230187	7230283	23714	14,34	2,5	8,5	0,0	198	99	0.000266185	0.0140086	0.778,0.773	1.0,1.0	-0.224
23838	ENSMUSG00000038495.14	Otud7b	chr3	+	96141487	96141715	96141621	96141715	96140416	96140605	23838	142215	73,89	127102	25,16	198	99	6.58764e-06	0.000670371	0.493,0.547	0.718,0.761	-0.22
24014	ENSMUSG00000028902.4	Sf3a3	chr4	+	124715280	124715704	124715651	124715704	124714882	124714990	24014	1,5	1,3	1,7	0,0	198	99	6.20283e-05	0.00446681	0.333,0.455	1.0,1.0	-0.606
24041	ENSMUSG00000029148.15	Nrbp1	chr5	+	31243913	31243991	31243917	31243991	31243762	31243832	24041	12,39	11,34	13,14	49,28	103	99	0.000416815	0.0198032	0.512,0.524	0.203,0.325	0.254
24056	ENSMUSG00000059851.15	Kmt5c	chr7	+	4742490	4742728	4742618	4742728	4742121	4742287	24056	23,44	85162	57,28	34,25	198	99	4.29099e-11	1.7191e-08	0.119,0.12	0.456,0.359	-0.288
24063	ENSMUSG00000001520.12	Nrip2	chr6	+	128404934	128406572	128406489	128406572	128399986	128400301	24063	19,47	1,2	33,31	13,7	198	99	0.000123382	0.00765733	0.905,0.922	0.559,0.689	0.289
24133	ENSMUSG00000022023.6	Wbp4	chr14	-	79470104	79470380	79470104	79470180	79472351	79472525	24133	7,7	0,0	1,2	15,13	198	99	4.51861e-14	2.67923e-11	1.0,1.0	0.032,0.071	0.949
24138	ENSMUSG00000026821.16	Ralgds	chr2	+	28542781	28542950	28542890	28542950	28542332	28542483	24138	61,99	42,63	19,28	89,72	198	99	9.22595e-14	5.3984e-11	0.421,0.44	0.096,0.163	0.301
24140	ENSMUSG00000026821.16	Ralgds	chr2	+	28542851	28542950	28542890	28542950	28542332	28542483	24140	56109	42,63	19,28	89,72	138	99	3.20965e-13	1.74065e-10	0.489,0.554	0.133,0.218	0.346
24189	ENSMUSG00000107741.2	Gm2011	chr3	+	40875241	40875388	40875246	40875388	40871157	40871185	24189	4,2	0,4	0,1	5,2	104	99	0.00043624	0.0204422	1.0,0.322	0.0,0.322	0.5
24266	ENSMUSG00000116275.1	Zc3h11a	chr1	-	133653972	133654328	133653972	133654032	133661236	133661380	24266	56110	20,55	22,11	33,28	198	99	2.74169e-07	4.70745e-05	0.583,0.5	0.25,0.164	0.334
24267	ENSMUSG00000116275.1	Zc3h11a	chr1	-	133653972	133654438	133653972	133654032	133661236	133661380	24267	59112	20,55	22,11	33,28	198	99	1.9078e-07	3.42096e-05	0.596,0.505	0.25,0.164	0.343
24319	ENSMUSG00000028822.11	Tmem50a	chr4	-	134913090	134913253	134913090	134913167	134914888	134915024	24319	130179	19,10	183146	4,1	185	99	8.11747e-06	0.000798741	0.785,0.905	0.961,0.987	-0.129
24552	ENSMUSG00000030120.14	Mlf2	chr6	+	124932392	124932537	124932435	124932537	124932098	124932176	24552	0,1	5,2	3,3	1,1	142	99	5.18576e-05	0.00384351	0.0,0.258	0.677,0.677	-0.548
24741	ENSMUSG00000025001.11	Hells	chr19	+	38954693	38955052	38954913	38955052	38953542	38953704	24741	18,27	0,0	16,16	1,4	198	99	0.000641817	0.0271751	1.0,1.0	0.889,0.667	0.222
24790	ENSMUSG00000044337.5	Ackr3	chr1	+	90209576	90209870	90209587	90209870	90204005	90204087	24790	5,9	7,18	10,3	2,1	110	99	0.000496416	0.0226185	0.391,0.31	0.818,0.73	-0.423
24803	ENSMUSG00000033991.9	Ttc37	chr13	+	76111676	76111816	76111733	76111816	76108192	76108283	24803	19,20	17,18	21,11	1,3	156	99	0.000166714	0.00970541	0.415,0.414	0.93,0.699	-0.4
24998	ENSMUSG00000059796.16	Eif4a1	chr11	-	69670683	69671117	69670683	69670992	69672278	69672423	24998	10,33	6,10	83,64	4,7	198	99	0.000478111	0.0219872	0.455,0.623	0.912,0.821	-0.328
25067	ENSMUSG00000018476.7	Kdm6b	chr11	-	69401911	69401984	69401911	69401981	69402075	69402281	25067	10,14	36102	1,1	29,31	102	99	0.000421857	0.0199787	0.212,0.118	0.032,0.03	0.134
25100	ENSMUSG00000002635.11	Pdcd2l	chr7	-	34196065	34196402	34196065	34196363	34196535	34196661	25100	8,6	1,7	4,7	0,0	138	99	3.26233e-05	0.00262343	0.852,0.381	1.0,1.0	-0.383
25166	ENSMUSG00000029385.14	Ccng2	chr5	+	93271112	93271279	93271181	93271279	93270793	93271044	25166	0,2	3,2	1,3	1,0	168	99	0.000448817	0.0208775	0.0,0.371	0.371,1.0	-0.5
25434	ENSMUSG00000045411.16	2410002F23Rik	chr7	+	44248039	44248295	44248251	44248295	44247250	44247416	25434	116151	72,87	50,40	8,7	198	99	5.22766e-06	0.000552195	0.446,0.465	0.758,0.741	-0.294
25474	ENSMUSG00000027646.15	Src	chr2	+	157424827	157424935	157424843	157424935	157424391	157424414	25474	7,3	1,0	2,2	3,2	115	99	0.000215818	0.0120419	0.858,1.0	0.365,0.463	0.515
25561	ENSMUSG00000015165.16	Hnrnpl	chr7	+	28817275	28817404	28817334	28817404	28815279	28815352	25561	12,16	19,39	33,36	2,7	158	99	5.91793e-12	2.68541e-09	0.284,0.204	0.912,0.763	-0.594
25579	ENSMUSG00000067150.6	Xpo5	chr17	+	46241441	46241890	46241725	46241890	46240814	46240922	25579	10,24	6,12	7,3	0,0	198	99	4.73625e-06	0.000509979	0.455,0.5	1.0,1.0	-0.522
25580	ENSMUSG00000067150.6	Xpo5	chr17	+	46241466	46241890	46241725	46241890	46240814	46240922	25580	20,29	6,12	7,5	0,0	198	99	1.13056e-05	0.00105844	0.625,0.547	1.0,1.0	-0.414
25675	ENSMUSG00000029458.14	Brap	chr5	+	121665033	121665288	121665064	121665288	121663295	121663491	25675	0,0	1,3	2,5	5,3	130	99	2.5337e-05	0.00210999	0.0,0.0	0.233,0.559	-0.396
25852	ENSMUSG00000028886.15	Eya3	chr4	+	132712148	132712440	132712347	132712440	132711841	132711963	25852	0,0	2,2	10,11	0,0	198	99	9.72555e-12	4.24015e-09	0.0,0.0	1.0,1.0	-1
25976	ENSMUSG00000037426.18	Depdc5	chr5	+	32901656	32901904	32901829	32901904	32901455	32901559	25976	6,6	103210	9,3	16,23	198	99	0.000107042	0.00686889	0.028,0.014	0.22,0.061	-0.12
26071	ENSMUSG00000026520.8	Pycr2	chr1	+	180906622	180906953	180906789	180906953	180906162	180906384	26071	10,15	5,8	7,6	0,1	198	99	0.000281063	0.0147046	0.5,0.484	1.0,0.75	-0.383
26108	ENSMUSG00000049957.14	Ccdc137	chr11	+	120459953	120460220	120460041	120460220	120459709	120459855	26108	19,18	0,6	7,3	0,0	187	99	0.000924891	0.035703	1.0,0.614	1.0,1.0	-0.193
26183	ENSMUSG00000006476.19	Nsmf	chr2	+	25061676	25061709	25061679	25061709	25061492	25061568	26183	1,7	2,0	0,0	3,1	102	99	6.97141e-07	0.000101313	0.327,1.0	0.0,0.0	0.663
26216	ENSMUSG00000037503.12	Fam168b	chr1	-	34837606	34837680	34837606	34837669	34842827	34843065	26216	4,1	9,5	0,0	2,2	110	99	0.00100421	0.0377172	0.286,0.153	0.0,0.0	0.219
26295	ENSMUSG00000042202.15	Slc35e2	chr4	+	155609838	155610130	155609941	155610130	155601415	155601738	26295	9,6	1,4	1,1	0,0	198	99	8.28671e-05	0.00561652	0.818,0.429	1.0,1.0	-0.377
26448	ENSMUSG00000021982.14	Cdadc1	chr14	-	59567728	59568038	59567728	59568019	59568947	59569008	26448	2,5	5,4	2,1	0,0	118	99	2.51193e-07	4.3635e-05	0.251,0.512	1.0,1.0	-0.619
26551	ENSMUSG00000000827.18	Tpd52l2	chr2	+	181512939	181513056	181513038	181513056	181511573	181511615	26551	37,46	93140	34,25	46,25	198	99	0.000523439	0.0235814	0.166,0.141	0.27,0.333	-0.148
26574	ENSMUSG00000026349.14	Ccnt2	chr1	+	127797530	127797719	127797632	127797719	127795254	127795317	26574	3,3	0,5	0,0	3,1	198	99	0.000220678	0.0122654	1.0,0.231	0.0,0.0	0.616
26575	ENSMUSG00000026349.14	Ccnt2	chr1	+	127797530	127797886	127797840	127797886	127795254	127795317	26575	15,20	102174	26,29	75,61	198	99	6.52025e-06	0.000665036	0.068,0.054	0.148,0.192	-0.109
26576	ENSMUSG00000026349.14	Ccnt2	chr1	+	127797632	127797886	127797840	127797886	127795254	127795317	26576	13,23	102174	29,30	75,61	198	99	1.80403e-06	0.000230532	0.06,0.062	0.162,0.197	-0.118
26685	ENSMUSG00000078429.9	Ctdsp2	chr10	+	126992598	126993034	126993007	126993034	126991530	126991676	26685	625961	10,9	975852	106,72	198	99	0	0	0.969,0.982	0.821,0.855	0.138
26722	ENSMUSG00000026414.13	Tnnt2	chr1	+	135845779	135845933	135845813	135845933	135845554	135845644	26722	2,6	3,9	4,4	0,1	133	99	6.04003e-05	0.00438173	0.332,0.332	1.0,0.749	-0.542
26799	ENSMUSG00000029521.7	Chek2	chr5	+	110840259	110840431	110840357	110840431	110839999	110840048	26799	1,6	0,9	1,2	0,0	197	99	0.000511218	0.0231035	1.0,0.251	1.0,1.0	-0.375
26978	ENSMUSG00000040852.6	Plekhh2	chr17	+	84565633	84566102	84565970	84566102	84563817	84563997	26978	0,1	71119	13,9	39,42	198	99	6.42043e-10	1.98275e-07	0.0,0.004	0.143,0.097	-0.118
26988	ENSMUSG00000027282.17	Mtch2	chr2	+	90852792	90853062	90853050	90853062	90849597	90849704	26988	44,62	16,32	31,28	135,88	198	99	0	0	0.579,0.492	0.103,0.137	0.415
26990	ENSMUSG00000027282.17	Mtch2	chr2	+	90852815	90853062	90853050	90853062	90849597	90849704	26990	40,65	16,32	31,30	135,88	198	99	0	0	0.556,0.504	0.103,0.146	0.406
26992	ENSMUSG00000027282.17	Mtch2	chr2	+	90852839	90853062	90853050	90853062	90849597	90849704	26992	13781910	16,32	13621207	135,88	198	99	0	0	0.977,0.968	0.835,0.873	0.118
27066	ENSMUSG00000026718.17	Stam	chr2	+	14138695	14139109	14138955	14139109	14137486	14137574	27066	5,5	0,0	6,6	2,2	198	99	0.000427743	0.0201715	1.0,1.0	0.6,0.6	0.4
27225	ENSMUSG00000063897.3	CAAA01118383.1	chrGL456216.1	+	34085	34345	34137	34345	15880	16407	27225	4,8	0,0	8,2	3,4	151	99	1.09056e-06	0.000149683	1.0,1.0	0.636,0.247	0.558
27293	ENSMUSG00000028582.14	Cc2d1b	chr4	+	108625344	108625814	108625654	108625814	108624845	108625004	27293	4,11	4,4	8,3	0,1	198	99	0.00115799	0.04232	0.333,0.579	1.0,0.6	-0.344
27304	ENSMUSG00000044037.15	Als2cl	chr9	+	110883854	110884146	110884014	110884146	110882713	110882823	27304	9,22	53,94	19,21	37,35	198	99	0.000985611	0.0372705	0.078,0.105	0.204,0.231	-0.126
27359	ENSMUSG00000018501.17	Ncor1	chr11	-	62319365	62319539	62319365	62319425	62320995	62321221	27359	64126	15,29	53,53	4,4	198	99	0.00132462	0.0466765	0.681,0.685	0.869,0.869	-0.186
27388	ENSMUSG00000028676.17	Srsf10	chr4	+	135861737	135861877	135861780	135861877	135858841	135859201	27388	7,24	16,29	4,3	25,26	142	99	0.00022809	0.0125379	0.234,0.366	0.1,0.074	0.213
27435	ENSMUSG00000041763.14	Tpp2	chr1	+	43980312	43980750	43980540	43980750	43978734	43978835	27435	2,1	1,0	0,0	3,2	198	99	0.000430575	0.0202621	0.5,1.0	0.0,0.0	0.75
27520	ENSMUSG00000006494.11	Pdk1	chr2	+	71887509	71887817	71887685	71887817	71885981	71886059	27520	4,6	0,0	2,2	2,3	198	99	7.05959e-07	0.000102261	1.0,1.0	0.333,0.25	0.709
27635	ENSMUSG00000029127.15	Zbtb49	chr5	-	38210617	38210943	38210617	38210664	38211845	38212088	27635	2,2	7,3	2,2	0,0	198	99	1.35604e-09	3.9673e-07	0.125,0.25	1.0,1.0	-0.812
27800	ENSMUSG00000029713.15	Gnb2	chr5	-	137529602	137530030	137529602	137529707	137530183	137530290	27800	6,3	0,0	4,8	4,3	198	99	4.11888e-07	6.54167e-05	1.0,1.0	0.333,0.571	0.548
27890	ENSMUSG00000039046.15	Usp6nl	chr2	+	6400074	6400319	6400279	6400319	6394472	6394555	27890	9,9	72,99	14,17	29,33	198	99	4.37401e-06	0.000473266	0.059,0.043	0.194,0.205	-0.149
28077	ENSMUSG00000041718.15	Alg13	chrX	+	144336111	144336463	144336332	144336463	144322011	144322150	28077	28,71	5,3	14,14	0,0	198	99	0.000727986	0.0298662	0.737,0.922	1.0,1.0	-0.17
28125	ENSMUSG00000042272.17	Sestd1	chr2	-	77246172	77246344	77246172	77246312	77280554	77280592	28125	7,4	0,2	0,0	2,2	131	99	5.91275e-09	1.46894e-06	1.0,0.602	0.0,0.0	0.801
28156	ENSMUSG00000029406.15	Pitpnm2	chr5	-	124129163	124129402	124129163	124129362	124130206	124130326	28156	29,27	0,1	16,9	4,6	139	99	4.85204e-06	0.000517434	1.0,0.951	0.74,0.517	0.347
28158	ENSMUSG00000029406.15	Pitpnm2	chr5	-	124129163	124129627	124129163	124129402	124130206	124130326	28158	0,1	29,27	3,7	16,9	198	99	3.78803e-05	0.00296052	0.0,0.018	0.086,0.28	-0.174
28215	ENSMUSG00000020640.10	Itsn2	chr12	+	4613069	4613305	4613242	4613305	4593061	4593232	28215	3,0	51,78	15,8	32,24	198	99	2.93319e-09	7.9054e-07	0.029,0.0	0.19,0.143	-0.152
28282	ENSMUSG00000025809.15	Itgb1	chr8	+	128723993	128724428	128724197	128724428	128722809	128723032	28282	5,11	10,8	2,0	10,4	198	99	0.00124388	0.0445374	0.2,0.407	0.091,0.0	0.258
28307	ENSMUSG00000032705.9	Exd2	chr12	+	80491096	80491185	80491125	80491185	80490780	80490887	28307	15,8	4,1	4,4	0,0	128	99	0.0012875	0.0456216	0.744,0.861	1.0,1.0	-0.198
28310	ENSMUSG00000027109.16	Sp3	chr2	-	72941884	72942281	72941884	72942006	72946545	72946738	28310	0,0	1,4	2,3	0,1	198	99	2.70675e-07	4.66548e-05	0.0,0.0	1.0,0.6	-0.8
28333	ENSMUSG00000036948.17	Map11	chr5	-	138262169	138262514	138262169	138262317	138262657	138262744	28333	10,14	0,7	3,3	0,0	198	99	0.000584211	0.025529	1.0,0.5	1.0,1.0	-0.25
28460	ENSMUSG00000025050.8	Pcgf6	chr19	-	47047946	47048037	47047946	47048029	47048107	47048163	28460	1,0	6,4	4,2	0,1	107	99	9.53665e-08	1.78943e-05	0.134,0.0	1.0,0.649	-0.758
28484	ENSMUSG00000001280.13	Sp1	chr15	+	102409157	102409427	102409160	102409427	102407771	102407932	28484	5,5	5,9	1,0	3,6	102	99	0.000651334	0.0274188	0.493,0.35	0.244,0.0	0.299
28647	ENSMUSG00000025816.15	Sec61a2	chr2	-	5886498	5886858	5886498	5886577	5893153	5893221	28647	6,7	1,0	2,4	6,9	198	99	4.51277e-07	7.04151e-05	0.75,1.0	0.143,0.182	0.713
28679	ENSMUSG00000028041.17	Adam15	chr3	-	89340278	89340776	89340278	89340472	89340862	89340937	28679	0,0	13,16	7,1	10,11	198	99	0.000211889	0.0118375	0.0,0.0	0.259,0.043	-0.151
28743	ENSMUSG00000026113.17	Inpp4a	chr1	+	37408126	37410736	37410289	37410736	37398765	37398920	28743	9,13	0,0	2,5	3,1	198	99	0.000184139	0.0105388	1.0,1.0	0.25,0.714	0.518
28753	ENSMUSG00000029319.8	Coq2	chr5	-	100663579	100663828	100663579	100663701	100665869	100666161	28753	35,59	1,10	65,39	0,0	198	99	2.15206e-05	0.00184753	0.946,0.747	1.0,1.0	-0.153
28756	ENSMUSG00000029319.8	Coq2	chr5	-	100663579	100663900	100663579	100663701	100667891	100668058	28756	35,60	205352	65,38	122105	198	99	4.46256e-07	7.01237e-05	0.079,0.079	0.21,0.153	-0.102
28759	ENSMUSG00000029319.8	Coq2	chr5	-	100663579	100663900	100663579	100663693	100673988	100674284	28759	11,9	5,5	39,37	0,0	198	99	3.40803e-09	8.96774e-07	0.524,0.474	1.0,1.0	-0.501
28769	ENSMUSG00000041459.15	Tardbp	chr4	-	148617553	148617657	148617553	148617635	148618664	148618791	28769	146198	21,27	110,74	4,1	121	99	8.62364e-06	0.000839154	0.85,0.857	0.957,0.984	-0.117
28786	ENSMUSG00000033705.17	Stard9	chr2	+	120679352	120679450	120679356	120679450	120677914	120677982	28786	12,15	2,8	5,1	0,0	103	99	9.09463e-05	0.0060548	0.852,0.643	1.0,1.0	-0.252
28885	ENSMUSG00000016833.14	Mrps18c	chr5	+	100801867	100801991	100801911	100801991	100798746	100798860	28885	31,34	0,0	15,17	2,3	143	99	0.0010704	0.0398334	1.0,1.0	0.839,0.797	0.182
28929	ENSMUSG00000041935.10	AW549877	chr15	-	3991717	3992067	3991717	3991888	3992357	3992464	28929	7,5	0,8	5,1	0,0	198	99	0.00126263	0.0450999	1.0,0.238	1.0,1.0	-0.381
28931	ENSMUSG00000041935.10	AW549877	chr15	-	3991955	3992253	3991955	3992067	3992357	3992464	28931	0,0	7,5	3,1	2,1	198	99	0.00116252	0.0423954	0.0,0.0	0.429,0.333	-0.381
28952	ENSMUSG00000017861.11	Mybl2	chr2	+	163062439	163062549	163062466	163062549	163061523	163061595	28952	11,27	7,8	9,8	0,1	126	99	0.000255091	0.0136181	0.553,0.726	1.0,0.863	-0.292
29014	ENSMUSG00000069895.4	Atxn1l	chr8	-	109733515	109733745	109733515	109733742	109735304	109735363	29014	44,47	134162	5,5	65,53	102	99	2.07227e-05	0.00178939	0.242,0.22	0.069,0.084	0.154
29039	ENSMUSG00000027327.16	1700037H04Rik	chr2	-	131151617	131151756	131151617	131151724	131153593	131153710	29039	6,13	0,0	7,4	6,0	131	99	0.000919398	0.0356122	1.0,1.0	0.469,1.0	0.266
29066	ENSMUSG00000026584.14	Scyl3	chr1	+	163940758	163941218	163941106	163941218	163939880	163939983	29066	24,46	90130	14,13	11,11	198	99	9.72374e-05	0.00635904	0.118,0.15	0.389,0.371	-0.246
29162	ENSMUSG00000056167.7	Cnot10	chr9	-	114596604	114597081	114596604	114596671	114597478	114598835	29162	0,0	1,5	4,3	0,1	198	99	7.27406e-09	1.76764e-06	0.0,0.0	1.0,0.6	-0.8
29198	ENSMUSG00000027479.14	Mapre1	chr2	+	153746226	153746379	153746258	153746379	153741273	153741419	29198	0,0	5,6	3,1	1,1	131	99	0.000174771	0.0100805	0.0,0.0	0.694,0.43	-0.562
29312	ENSMUSG00000034799.16	Unc13a	chr8	-	71660340	71660832	71660340	71660649	71661818	71661851	29312	5,7	54,93	78,52	13,7	198	99	0	0	0.044,0.036	0.75,0.788	-0.729
29419	ENSMUSG00000024483.19	Ankhd1	chr18	+	36578617	36578774	36578659	36578774	36575018	36575169	29419	86136	23,28	150,82	5,10	141	99	4.46779e-05	0.00339628	0.724,0.773	0.955,0.852	-0.155
29563	ENSMUSG00000025212.17	Sfxn3	chr19	+	45050050	45050326	45050231	45050326	45049743	45049914	29563	0,2	2,5	1,1	0,0	198	99	7.232e-11	2.70258e-08	0.0,0.167	1.0,1.0	-0.916
29639	ENSMUSG00000003355.7	Fkbp11	chr15	-	98726483	98726922	98726483	98726554	98727210	98727298	29639	3,18	1,2	5,1	11,9	198	99	2.21374e-06	0.000270453	0.6,0.818	0.185,0.053	0.59
29777	ENSMUSG00000038079.14	Tmem237	chr1	-	59114080	59114382	59114080	59114218	59119702	59119806	29777	10,18	0,2	3,5	8,8	198	99	7.14522e-08	1.38151e-05	1.0,0.818	0.158,0.238	0.711
29799	ENSMUSG00000037679.9	Inf2	chr12	+	112612120	112612604	112612547	112612604	112611409	112612036	29799	6,11	89175	7,8	21,23	198	99	0.000183325	0.0105193	0.033,0.03	0.143,0.148	-0.114
29805	ENSMUSG00000002147.18	Stat6	chr10	+	127655168	127655503	127655190	127655503	127654925	127655018	29805	1,0	1,1	7,3	0,1	121	99	0.00128083	0.0454577	0.45,0.0	1.0,0.711	-0.63
29823	ENSMUSG00000026782.15	Abi2	chr1	+	60448077	60448202	60448080	60448202	60443984	60444082	29823	1,4	0,0	5,8	7,4	102	99	4.93584e-06	0.000523858	1.0,1.0	0.409,0.66	0.466
29829	ENSMUSG00000026782.15	Abi2	chr1	+	60448077	60448202	60448080	60448202	60447259	60447406	29829	202364	47,54	248216	96,68	102	99	0.000105237	0.0068022	0.807,0.867	0.715,0.755	0.102
29855	ENSMUSG00000041997.16	Tlk1	chr2	-	70724001	70724107	70724001	70724104	70725479	70725577	29855	1,3	0,2	0,0	5,2	102	99	3.46471e-05	0.00274645	1.0,0.593	0.0,0.0	0.796
29884	ENSMUSG00000039988.14	Ankrd13c	chr3	+	157994596	157994758	157994651	157994758	157991722	157991812	29884	259367	5,5	93,72	11,7	154	99	3.40749e-06	0.000388541	0.971,0.979	0.845,0.869	0.118
29944	ENSMUSG00000026811.18	St6galnac6	chr2	+	32612223	32612403	32612285	32612403	32608084	32608096	29944	4,9	4,1	19,18	0,0	161	99	0.000155389	0.00915251	0.381,0.847	1.0,1.0	-0.386
29960	ENSMUSG00000026426.10	Arl8a	chr1	+	135152278	135152551	135152474	135152551	135146823	135147100	29960	11,29	2,4	18,5	0,0	198	99	0.000484771	0.0221788	0.733,0.784	1.0,1.0	-0.242
30056	ENSMUSG00000044328.13	Trp53i13	chr11	-	77512321	77512795	77512321	77512694	77512896	77513035	30056	19,25	46,78	35,32	36,34	198	99	0.000140969	0.00848293	0.171,0.138	0.327,0.32	-0.169
30089	ENSMUSG00000021819.11	Zswim8	chr14	+	20711745	20712118	20712036	20712118	20711457	20711630	30089	2,7	3,1	3,4	0,0	198	99	0.000399269	0.0192159	0.25,0.778	1.0,1.0	-0.486
30369	ENSMUSG00000042185.14	Nfrkb	chr9	+	31396801	31397137	31397035	31397137	31396322	31396497	30369	32,40	37,90	21,14	8,8	198	99	0.000456968	0.0211461	0.302,0.182	0.568,0.467	-0.275
30371	ENSMUSG00000042185.14	Nfrkb	chr9	+	31396992	31397137	31397035	31397137	31396322	31396497	30371	34,40	37,90	20,14	8,8	142	99	0.00106566	0.0397129	0.39,0.237	0.635,0.55	-0.279
30534	ENSMUSG00000009995.17	Taz	chrX	+	74288303	74288513	74288447	74288513	74288177	74288219	30534	31,47	8,11	14,18	0,0	198	99	2.00559e-06	0.00025053	0.66,0.681	1.0,1.0	-0.329
30574	ENSMUSG00000026020.9	Nop58	chr1	+	59704000	59704161	59704062	59704161	59700884	59700949	30574	14,19	2,0	8,4	4,5	161	99	0.000104152	0.00674181	0.811,1.0	0.552,0.33	0.464
30705	ENSMUSG00000027206.13	Cops2	chr2	-	125842432	125842696	125842432	125842510	125844809	125844935	30705	34,48	3,0	43,54	43,52	198	99	3.10862e-14	1.92001e-11	0.85,1.0	0.333,0.342	0.588
30709	ENSMUSG00000027206.13	Cops2	chr2	-	125842621	125842732	125842621	125842711	125848268	125848284	30709	82109	13,18	147131	77,54	120	99	2.73327e-06	0.00032007	0.839,0.833	0.612,0.667	0.197
30844	ENSMUSG00000008855.17	Hdac5	chr11	-	102218686	102218953	102218686	102218819	102224733	102224955	30844	3,7	0,0	18,23	5,2	198	99	0.000108077	0.00690542	1.0,1.0	0.643,0.852	0.252
30851	ENSMUSG00000008855.17	Hdac5	chr11	-	102218710	102218819	102218710	102218781	102224733	102224955	30851	0,0	3,2	5,2	15,6	137	99	0.000775315	0.0312586	0.0,0.0	0.194,0.194	-0.194
30852	ENSMUSG00000008855.17	Hdac5	chr11	-	102218710	102218953	102218710	102218781	102224733	102224955	30852	68136	3,2	92106	15,6	198	99	0.000999104	0.0376208	0.919,0.971	0.754,0.898	0.119
30853	ENSMUSG00000008855.17	Hdac5	chr11	-	102218710	102218978	102218710	102218781	102224733	102224955	30853	65129	3,2	74,84	15,6	198	99	0.000352894	0.0175147	0.915,0.97	0.712,0.875	0.149
30854	ENSMUSG00000008855.17	Hdac5	chr11	-	102218710	102218982	102218710	102218781	102224733	102224955	30854	65130	3,2	76,85	15,6	198	99	0.000374191	0.0183263	0.915,0.97	0.717,0.876	0.146
31008	ENSMUSG00000031078.15	Cttn	chr7	-	144449550	144450021	144449550	144449615	144454675	144454786	31008	58,83	4,2	31,35	50,49	198	99	0	0	0.879,0.954	0.237,0.263	0.666
31017	ENSMUSG00000020288.13	Ahsa2	chr11	-	23492217	23492638	23492217	23492306	23496690	23496881	31017	9,8	0,2	2,0	23,8	198	99	9.59611e-11	3.55616e-08	1.0,0.667	0.042,0.0	0.812
31106	ENSMUSG00000026279.14	Thap4	chr1	-	93713087	93713514	93713087	93713334	93714897	93715001	31106	0,0	2,2	12,5	26,19	198	99	0.000542671	0.0242482	0.0,0.0	0.188,0.116	-0.152
31154	ENSMUSG00000035495.15	Tstd2	chr4	-	46119813	46119999	46119813	46119913	46120447	46120566	31154	198336	7,14	109102	14,13	185	99	0.000228595	0.0125476	0.938,0.928	0.806,0.808	0.126
31156	ENSMUSG00000035495.15	Tstd2	chr4	-	46135494	46135594	46135494	46135591	46137320	46137428	31156	11,13	0,6	2,5	0,0	102	99	0.00111475	0.0411053	1.0,0.678	1.0,1.0	-0.161
31181	ENSMUSG00000031278.12	Acsl4	chrX	-	142351378	142351908	142351378	142351618	142360382	142360436	31181	113150	14,13	170128	7,1	198	99	0.000243654	0.0132558	0.801,0.852	0.924,0.985	-0.128
31278	ENSMUSG00000027087.11	Itgav	chr2	+	83781940	83782046	83781944	83782046	83779013	83779059	31278	1,5	2,3	1,1	0,0	103	99	3.35803e-05	0.00268018	0.325,0.616	1.0,1.0	-0.529
31304	ENSMUSG00000030037.9	Mrpl53	chr6	+	83109524	83109939	83109568	83109939	83109313	83109426	31304	3,9	1,1	0,1	1,1	143	99	0.000769635	0.031086	0.675,0.862	0.0,0.409	0.564
31331	ENSMUSG00000037395.15	Rcor3	chr1	-	192101387	192101867	192101387	192101687	192108643	192108701	31331	27,29	2,5	10,8	0,0	198	99	0.000320618	0.0162022	0.871,0.744	1.0,1.0	-0.193
31372	ENSMUSG00000033159.14	Cnppd1	chr1	-	75141408	75141769	75141408	75141503	75142057	75142638	31372	216287	109189	392355	121107	198	99	8.85801e-06	0.00085673	0.498,0.432	0.618,0.624	-0.156
31416	ENSMUSG00000026203.16	Dnajb2	chr1	+	75244562	75244804	75244793	75244804	75243457	75243661	31416	37,62	33,41	17,12	96,83	198	99	1.11022e-16	9.3154e-14	0.359,0.431	0.081,0.067	0.321
31440	ENSMUSG00000033021.16	Gmppa	chr1	+	75436153	75436239	75436193	75436239	75435981	75436011	31440	2,15	0,1	7,4	3,5	139	99	7.77382e-05	0.00535972	1.0,0.914	0.624,0.363	0.464
31466	ENSMUSG00000026211.17	Obsl1	chr1	-	75486639	75486909	75486639	75486895	75487222	75487327	31466	24,23	3,5	6,15	0,0	113	99	0.000290147	0.015091	0.875,0.801	1.0,1.0	-0.162
31527	ENSMUSG00000029432.12	Nipsnap2	chr5	+	129754681	129754863	129754771	129754863	129753229	129753320	31527	0,0	4,3	2,1	0,1	189	99	0.000451477	0.0209574	0.0,0.0	1.0,0.344	-0.672
31689	ENSMUSG00000063200.4	Nol7	chr13	+	43401300	43401577	43401499	43401577	43400852	43400934	31689	21,25	0,8	23,16	0,0	198	99	0.000358016	0.0177294	1.0,0.61	1.0,1.0	-0.195
31692	ENSMUSG00000070420.4	Zscan25	chr5	+	145283351	145283813	145283378	145283813	145280499	145280627	31692	112147	10,35	45,44	2,1	126	99	0.00024786	0.0133296	0.898,0.767	0.946,0.972	-0.126
31695	ENSMUSG00000063229.15	Ldha	chr7	+	46847241	46847646	46847538	46847646	46845869	46845917	31695	28,55	10,5	52,24	0,0	198	99	1.50143e-06	0.000197541	0.583,0.846	1.0,1.0	-0.286
31701	ENSMUSG00000063229.15	Ldha	chr7	+	46847241	46847646	46847595	46847646	46846301	46846446	31701	74185	18,55	127103	7,9	198	99	4.65912e-07	7.19414e-05	0.673,0.627	0.901,0.851	-0.226
31800	ENSMUSG00000025507.13	Pidd1	chr7	-	141441172	141441399	141441172	141441316	141441474	141441529	31800	18,20	4,8	6,2	0,0	182	99	2.78116e-05	0.00228216	0.71,0.576	1.0,1.0	-0.357
31899	ENSMUSG00000063884.6	Ptcd3	chr6	-	71894820	71895013	71894820	71894881	71895617	71895693	31899	15,19	2,9	14,13	1,0	198	99	0.000264535	0.0139548	0.789,0.514	0.875,1.0	-0.286
31933	ENSMUSG00000027184.14	Caprin1	chr2	-	103775609	103776009	103775609	103775765	103776104	103776157	31933	14,26	0,0	24,32	6,0	198	99	0.00115816	0.04232	1.0,1.0	0.667,1.0	0.166
31975	ENSMUSG00000032507.15	Fbxl2	chr9	-	113983967	113984238	113983967	113984041	113984540	113984585	31975	7,7	6,15	0,1	5,7	198	99	0.000244587	0.0132805	0.368,0.189	0.0,0.067	0.245
32101	ENSMUSG00000038383.16	Pigu	chr2	-	155299045	155299175	155299045	155299133	155301200	155301355	32101	18,11	0,0	5,2	3,2	141	99	1.31134e-05	0.00120238	1.0,1.0	0.539,0.413	0.524
32183	ENSMUSG00000030269.14	Mtmr14	chr6	+	113277794	113277945	113277830	113277945	113270521	113270701	32183	2,8	3,6	3,7	0,0	135	99	2.84138e-07	4.83686e-05	0.328,0.494	1.0,1.0	-0.589
32232	ENSMUSG00000053332.13	Gas5	chr1	+	161036094	161036579	161036548	161036579	161035982	161036014	32232	227371	110166	144,76	244260	198	99	0	0	0.508,0.528	0.228,0.128	0.34
32237	ENSMUSG00000053332.13	Gas5	chr1	+	161036109	161036579	161036548	161036579	161035982	161036014	32237	223357	110166	113,57	244260	198	99	0	0	0.503,0.518	0.188,0.099	0.367
32241	ENSMUSG00000053332.13	Gas5	chr1	+	161036179	161036579	161036548	161036579	161035982	161036014	32241	223358	110166	112,57	244260	198	99	0	0	0.503,0.519	0.187,0.099	0.368
32244	ENSMUSG00000053332.13	Gas5	chr1	+	161036192	161036579	161036548	161036579	161035982	161036014	32244	223357	110166	114,57	244260	198	99	0	0	0.503,0.518	0.189,0.099	0.366
32246	ENSMUSG00000053332.13	Gas5	chr1	+	161036217	161036579	161036548	161036579	161035982	161036014	32246	223357	110166	112,58	244260	198	99	0	0	0.503,0.518	0.187,0.1	0.367
32251	ENSMUSG00000053332.13	Gas5	chr1	+	161036555	161036852	161036819	161036852	161036207	161036244	32251	248326	5,4	227229	32,13	198	99	1.05884e-07	1.97016e-05	0.961,0.976	0.78,0.898	0.129
32259	ENSMUSG00000053332.13	Gas5	chr1	+	161037258	161037547	161037504	161037547	161036819	161036852	32259	201332	14,14	217176	31,22	198	99	0.000224678	0.0124117	0.878,0.922	0.778,0.8	0.111
32340	ENSMUSG00000062310.7	Glrp1	chr1	-	88503141	88503547	88503141	88503541	88509790	88510066	32340	3,1	0,1	0,2	5,2	105	99	0.000151065	0.00898145	1.0,0.485	0.0,0.485	0.5
32425	ENSMUSG00000021190.14	Lgmn	chr12	-	102413464	102413592	102413464	102413558	102423584	102423769	32425	23,28	0,0	66,41	3,8	133	99	0.000240463	0.0131047	1.0,1.0	0.942,0.792	0.133
32529	ENSMUSG00000031807.10	Pgls	chr8	+	71599868	71600195	71600069	71600195	71599077	71599208	32529	2,6	12,11	1,4	0,0	198	99	4.92013e-07	7.46752e-05	0.077,0.214	1.0,1.0	-0.855
32543	ENSMUSG00000053483.13	Usp21	chr1	-	171285254	171285507	171285254	171285375	171286349	171287100	32543	0,1	1,3	7,6	5,2	198	99	0.00040106	0.0192813	0.0,0.143	0.412,0.6	-0.434
32589	ENSMUSG00000059939.13	9430015G10Rik	chr4	+	156119795	156120172	156119863	156120172	156119163	156119239	32589	0,0	1,3	2,1	1,0	167	99	0.000203167	0.0114076	0.0,0.0	0.542,1.0	-0.771
32595	ENSMUSG00000028643.11	Svbp	chr4	+	119195726	119196021	119195876	119196021	119195406	119195486	32595	5,11	2,2	3,8	0,0	198	99	0.00143692	0.0496118	0.556,0.733	1.0,1.0	-0.355
32957	ENSMUSG00000026965.12	Anapc2	chr2	+	25284844	25285172	25284940	25285172	25284561	25284691	32957	0,0	3,1	2,3	0,0	195	99	5.87779e-10	1.8538e-07	0.0,0.0	1.0,1.0	-1
32976	ENSMUSG00000015095.12	Fbxw5	chr2	+	25501901	25502151	25501993	25502151	25500878	25500886	32976	6,4	3,7	0,0	1,1	191	99	5.0727e-05	0.00377229	0.509,0.229	0.0,0.0	0.369
33118	ENSMUSG00000040463.16	Mybbp1a	chr11	+	72450607	72451005	72450876	72451005	72449992	72450094	33118	8,15	9,4	6,3	1,0	198	99	0.00102366	0.0383181	0.308,0.652	0.75,1.0	-0.395
33120	ENSMUSG00000040463.16	Mybbp1a	chr11	+	72450628	72451005	72450876	72451005	72449992	72450094	33120	8,13	9,4	6,4	1,0	198	99	0.000618256	0.0264364	0.308,0.619	0.75,1.0	-0.411
33159	ENSMUSG00000026837.15	Col5a1	chr2	+	28028966	28029165	28029096	28029165	28025592	28025705	33159	350579	622841	360326	195145	198	99	0	0	0.22,0.256	0.48,0.529	-0.266
33301	ENSMUSG00000026857.9	Ntmt1	chr2	+	30820448	30820701	30820452	30820701	30819628	30819768	33301	76126	12,23	15,12	1,0	103	99	0.000600226	0.0259355	0.859,0.84	0.935,1.0	-0.118
33343	ENSMUSG00000030695.16	Aldoa	chr7	-	126797638	126798126	126797638	126797776	126800287	126800447	33343	12912112	420735	26542185	418360	198	99	5.52125e-11	2.13504e-08	0.606,0.59	0.76,0.752	-0.158
33390	ENSMUSG00000031320.9	Rps4x	chrX	-	102187626	102187972	102187626	102187937	102188293	102188371	33390	2,3	0,0	13,7	9,4	134	99	1.29647e-05	0.0011912	1.0,1.0	0.516,0.564	0.46
33469	ENSMUSG00000070003.7	Ssbp4	chr8	-	70602182	70602676	70602182	70602462	70608124	70608314	33469	6,13	0,1	7,5	5,1	198	99	0.00043317	0.0203411	1.0,0.867	0.412,0.714	0.371
33617	ENSMUSG00000042133.16	Ppig	chr2	+	69735867	69736319	69735988	69736319	69734290	69734378	33617	174343	0,2	208180	10,13	198	99	8.52846e-08	1.62077e-05	1.0,0.988	0.912,0.874	0.101
33728	ENSMUSG00000026234.12	Ncl	chr1	-	86356051	86356445	86356051	86356442	86356555	86356741	33728	22,54	7,13	50,30	2,0	102	99	3.72782e-06	0.000416522	0.753,0.801	0.96,1.0	-0.203
33736	ENSMUSG00000021288.18	Klc1	chr12	+	111805990	111806074	111806007	111806074	111789348	111789486	33736	5,1	82144	5,2	18,7	116	99	0.000930196	0.0357926	0.049,0.006	0.192,0.196	-0.167
33782	ENSMUSG00000075376.10	Rc3h2	chr2	-	37377133	37377400	37377133	37377268	37377850	37377935	33782	5,9	0,0	7,1	11,14	198	99	1.51301e-10	5.25652e-08	1.0,1.0	0.241,0.034	0.863
33783	ENSMUSG00000075376.10	Rc3h2	chr2	-	37377133	37377430	37377133	37377268	37377850	37377935	33783	11,17	0,0	12,3	11,14	198	99	2.56973e-11	1.05811e-08	1.0,1.0	0.353,0.097	0.775
33989	ENSMUSG00000055612.15	Cdca7	chr2	+	72478777	72479028	72478911	72479028	72476252	72476311	33989	0,0	2,2	2,2	2,0	198	99	0.00124096	0.0444684	0.0,0.0	0.333,1.0	-0.666
34029	ENSMUSG00000037652.15	Phc3	chr3	-	30936284	30937156	30936284	30936661	30942408	30942652	34029	27,32	0,1	30,32	5,7	198	99	2.63177e-05	0.00217133	1.0,0.941	0.75,0.696	0.247
34034	ENSMUSG00000074500.11	Zfp558	chr9	-	18472885	18473269	18472885	18472994	18473353	18473559	34034	4,9	13,10	0,0	2,4	198	99	0.00015636	0.00919753	0.133,0.31	0.0,0.0	0.222
34165	ENSMUSG00000038047.18	Haus6	chr4	-	86602872	86602963	86602872	86602945	86605636	86605715	34165	6,4	1,0	3,4	4,2	117	99	0.000498818	0.0227046	0.835,1.0	0.388,0.629	0.409
34227	ENSMUSG00000038759.15	Nup205	chr6	+	35245504	35245579	35245508	35245579	35245247	35245376	34227	7,2	0,1	4,2	5,1	103	99	0.000961797	0.0366819	1.0,0.658	0.435,0.658	0.282
34243	ENSMUSG00000039844.19	Rapgef1	chr2	+	29689111	29689263	29689130	29689263	29686104	29686283	34243	0,4	2,4	2,2	0,0	118	99	7.63587e-07	0.000108836	0.0,0.456	1.0,1.0	-0.772
34288	ENSMUSG00000039108.14	Lsm14b	chr2	+	180031793	180032138	180032060	180032138	180031360	180031528	34288	418617	22,49	362349	2,3	198	99	2.5376e-11	1.05465e-08	0.905,0.863	0.989,0.983	-0.102
34341	ENSMUSG00000053453.9	Thoc7	chr14	-	13957061	13957535	13957061	13957180	13961184	13961277	34341	10,6	9,1	4,9	1,0	198	99	0.00101199	0.0379453	0.357,0.75	0.667,1.0	-0.28
34358	ENSMUSG00000044308.17	Ubr3	chr2	+	70000255	70000543	70000457	70000543	69999084	69999218	34358	7,14	12,5	6,8	0,0	198	99	5.02232e-07	7.57093e-05	0.226,0.583	1.0,1.0	-0.596
34500	ENSMUSG00000037936.15	Scarb1	chr5	-	125281093	125281557	125281093	125281230	125283898	125284159	34500	0,0	1,2	1,1	0,0	198	99	5.94589e-09	1.46897e-06	0.0,0.0	1.0,1.0	-1
34719	ENSMUSG00000037996.17	Slc24a2	chr4	-	86991172	86991593	86991172	86991389	86996512	86996679	34719	12,25	7,1	3,4	0,0	198	99	0.000173665	0.0100394	0.462,0.926	1.0,1.0	-0.306
34822	ENSMUSG00000024962.13	Vegfb	chr19	-	6985360	6985644	6985360	6985495	6985804	6985840	34822	198313	104186	352306	137,87	198	99	0.000781658	0.0314005	0.488,0.457	0.562,0.637	-0.127
34996	ENSMUSG00000035242.15	Oaz1	chr10	+	80828357	80828633	80828460	80828633	80826692	80826905	34996	16,22	4,13	20,24	2,1	198	99	0.000826386	0.0330183	0.667,0.458	0.833,0.923	-0.316
35116	ENSMUSG00000029227.15	Fip1l1	chr5	+	74545748	74546160	74546052	74546160	74542008	74542112	35116	8,7	0,0	5,6	5,2	198	99	3.02618e-07	5.09444e-05	1.0,1.0	0.333,0.6	0.533
35131	ENSMUSG00000025858.12	Get4	chr5	+	139265609	139265765	139265669	139265765	139263478	139263628	35131	14,19	1,5	13,10	0,0	159	99	0.000154233	0.00912065	0.897,0.703	1.0,1.0	-0.2
35178	ENSMUSG00000032449.13	Slc25a36	chr9	-	97089701	97092605	97089701	97089876	97093076	97093177	35178	3,7	10,28	1,4	1,0	198	99	0.000895949	0.0351038	0.13,0.111	0.333,1.0	-0.546
35191	ENSMUSG00000025010.14	Ccnj	chr19	+	40845077	40845204	40845080	40845204	40844659	40844959	35191	4,9	1,4	1,2	0,0	102	99	0.000587037	0.0255788	0.795,0.686	1.0,1.0	-0.259
35256	ENSMUSG00000031960.14	Aars	chr8	+	111034171	111034263	111034206	111034263	111033878	111033908	35256	161280	13,15	66,60	15,11	134	99	0.000252715	0.0135401	0.901,0.932	0.765,0.801	0.134
35309	ENSMUSG00000034757.15	Tmub2	chr11	+	102285841	102286001	102285979	102286001	102285663	102285718	35309	0,0	1,6	1,2	1,0	198	99	0.000555871	0.0246456	0.0,0.0	0.333,1.0	-0.666
35358	ENSMUSG00000048661.14	Lemd3	chr10	-	120931720	120932023	120931720	120931823	120977783	120979332	35358	4,6	0,0	3,5	8,12	198	99	5.46913e-09	1.36636e-06	1.0,1.0	0.158,0.172	0.835
35360	ENSMUSG00000038671.15	Arfrp1	chr2	-	181359427	181359846	181359427	181359561	181361000	181361472	35360	4,4	2,2	7,8	0,0	198	99	9.79497e-05	0.00638684	0.5,0.5	1.0,1.0	-0.5
35362	ENSMUSG00000038671.15	Arfrp1	chr2	-	181361000	181361069	181361000	181361066	181361390	181361472	35362	3,11	5,2	8,8	1,0	102	99	0.0010113	0.0379453	0.368,0.842	0.886,1.0	-0.338
35364	ENSMUSG00000038671.15	Arfrp1	chr2	-	181361000	181361096	181361000	181361066	181361390	181361472	35364	7,15	5,2	12,15	1,0	129	99	0.000745297	0.0303233	0.518,0.852	0.902,1.0	-0.266
35365	ENSMUSG00000038671.15	Arfrp1	chr2	-	181361000	181361139	181361000	181361066	181361390	181361472	35365	7,15	5,2	10,15	1,0	172	99	0.00073866	0.030136	0.446,0.812	0.852,1.0	-0.297
35465	ENSMUSG00000026972.15	Arrdc1	chr2	-	24925354	24925696	24925354	24925676	24925755	24926448	35465	5,18	48,54	4,0	43,38	119	99	0.000954249	0.0364879	0.08,0.217	0.072,0.0	0.112
35467	ENSMUSG00000026972.15	Arrdc1	chr2	-	24925755	24926182	24925755	24925833	24926271	24926448	35467	4,7	1,3	5,3	0,0	198	99	0.000476628	0.0219644	0.667,0.538	1.0,1.0	-0.397
35511	ENSMUSG00000021215.15	Net1	chr13	-	3887570	3887998	3887570	3887667	3888354	3888522	35511	26,42	3,3	34,21	38,21	198	99	6.68698e-11	2.52009e-08	0.812,0.875	0.309,0.333	0.522
35526	ENSMUSG00000023852.14	Chd1	chr17	+	15733005	15733163	15733040	15733163	15732538	15732639	35526	0,0	1,4	1,2	0,0	134	99	9.5015e-10	2.81688e-07	0.0,0.0	1.0,1.0	-1
35577	ENSMUSG00000037174.18	Elf2	chr3	-	51264861	51265073	51264861	51265006	51266752	51266866	35577	63138	259410	86,93	58,58	166	99	0	0	0.127,0.167	0.469,0.489	-0.332
35676	ENSMUSG00000044700.15	Tmem201	chr4	-	149718650	149718944	149718650	149718835	149719511	149719583	35676	40,61	5,8	50,56	1,0	198	99	1.40837e-05	0.00127556	0.8,0.792	0.962,1.0	-0.185
35677	ENSMUSG00000044700.15	Tmem201	chr4	-	149718650	149718944	149718650	149718890	149719511	149719583	35677	40,61	14,12	50,56	1,4	153	99	7.22468e-05	0.00502788	0.649,0.767	0.97,0.901	-0.228
35722	ENSMUSG00000040084.9	Bub1b	chr2	+	118599963	118600284	118600142	118600284	118598210	118598461	35722	3,3	10,4	0,0	5,3	198	99	0.000836161	0.0333191	0.13,0.273	0.0,0.0	0.202
35743	ENSMUSG00000028907.7	Utp11	chr4	-	124682192	124682340	124682192	124682291	124682412	124683348	35743	3,9	2,4	6,7	0,1	148	99	0.000852518	0.0337892	0.501,0.601	1.0,0.824	-0.361
35846	ENSMUSG00000035107.13	Dcbld2	chr16	+	58448451	58448947	58448815	58448947	58433325	58433463	35846	5,6	0,0	0,5	5,3	198	99	3.39009e-09	8.96774e-07	1.0,1.0	0.0,0.455	0.772
35884	ENSMUSG00000056612.7	Ppp1r14b	chr19	+	6976425	6976627	6976543	6976627	6975257	6975617	35884	94183	133192	80,73	210186	198	99	1.13683e-06	0.000154131	0.261,0.323	0.16,0.164	0.13
35921	ENSMUSG00000031834.15	Pik3r2	chr8	-	70775847	70776214	70775847	70776042	70776606	70776713	35921	1,0	0,2	5,3	0,0	198	99	0.00119564	0.0431926	1.0,0.0	1.0,1.0	-0.5
35934	ENSMUSG00000086416.1	Gm14002	chr2	-	125207528	125210111	125207528	125207865	125211664	125211739	35934	13,11	2,16	0,1	6,3	198	99	8.24912e-05	0.00560059	0.765,0.256	0.0,0.143	0.439
35961	ENSMUSG00000027361.15	Gabpb1	chr2	-	126662990	126663151	126662990	126663085	126675355	126675592	35961	1,1	0,0	0,2	3,1	165	99	1.97308e-06	0.000247861	1.0,1.0	0.0,0.545	0.728
36246	ENSMUSG00000094365.1	Gm21982	chr7	-	30645666	30646026	30645666	30645842	30647559	30647634	36246	14,23	2,4	5,7	10,5	198	99	0.000262104	0.0138594	0.778,0.742	0.2,0.412	0.454
36370	ENSMUSG00000033862.7	Cdk10	chr8	+	123227280	123227743	123227659	123227743	123226945	123227017	36370	7,9	3,3	4,8	0,0	198	99	2.53858e-05	0.0021101	0.538,0.6	1.0,1.0	-0.431
36529	ENSMUSG00000025240.9	Sacm1l	chr9	+	123585093	123585357	123585284	123585357	123582247	123582386	36529	4,12	1,0	8,12	6,2	198	99	0.00128527	0.0455787	0.667,1.0	0.4,0.75	0.259
36549	ENSMUSG00000038145.17	Snrk	chr9	+	122133960	122134076	122134002	122134076	122132627	122132750	36549	48,81	0,1	27,15	3,3	141	99	0.000598305	0.0259121	1.0,0.983	0.863,0.778	0.171
36550	ENSMUSG00000038145.17	Snrk	chr9	+	122133986	122134076	122134002	122134076	122132627	122132750	36550	19,22	0,1	3,15	3,3	115	99	0.000321516	0.0162291	1.0,0.95	0.463,0.811	0.338
36626	ENSMUSG00000024359.10	Hspa9	chr18	-	34938266	34938407	34938266	34938374	34938583	34938724	36626	1,4	0,0	0,1	3,0	132	99	0.000812386	0.0325174	1.0,1.0	0.0,1.0	0.5
36628	ENSMUSG00000024359.10	Hspa9	chr18	-	34938266	34938418	34938266	34938407	34938583	34938724	36628	0,0	1,4	1,2	0,1	110	99	3.28069e-05	0.00263343	0.0,0.0	1.0,0.643	-0.822
36651	ENSMUSG00000051403.9	Ppp1r37	chr7	-	19535490	19535609	19535490	19535583	19535708	19535754	36651	12,7	1,4	1,3	0,0	125	99	0.000777809	0.0313234	0.905,0.581	1.0,1.0	-0.257
36689	ENSMUSG00000039476.13	Prrx2	chr2	+	30879357	30879670	30879455	30879670	30878409	30878591	36689	0,1	7,8	4,8	17,17	197	99	0.0012773	0.0453794	0.0,0.059	0.106,0.191	-0.119
36699	ENSMUSG00000016921.14	Srsf6	chr2	+	162932814	162933082	162933023	162933082	162931993	162932142	36699	46,59	7,7	67,92	0,3	198	99	0.000106131	0.00684931	0.767,0.808	1.0,0.939	-0.182
36751	ENSMUSG00000017697.3	Ada	chr2	-	163726583	163727051	163726583	163727048	163727543	163727643	36751	5,9	19,38	0,0	9,3	102	99	0.000154442	0.00912089	0.203,0.187	0.0,0.0	0.195
36810	ENSMUSG00000047409.13	Ctdspl	chr9	+	118929660	118929932	118929860	118929932	118926861	118926940	36810	2,0	3,5	3,4	0,0	198	99	5.63183e-12	2.58193e-09	0.25,0.0	1.0,1.0	-0.875
36926	ENSMUSG00000055897.13	Ppp4r1l-ps	chr2	-	173592116	173592420	173592116	173592221	173592801	173593014	36926	5,5	11,9	7,8	1,3	198	99	0.00116628	0.0424422	0.185,0.217	0.778,0.571	-0.473
36930	ENSMUSG00000055897.13	Ppp4r1l-ps	chr2	-	173592801	173593045	173592801	173592851	173597039	173597187	36930	6,9	2,2	3,4	0,0	198	99	0.00111352	0.0411053	0.6,0.692	1.0,1.0	-0.354
37007	ENSMUSG00000045751.16	Mms22l	chr4	+	24502730	24503112	24502931	24503112	24500036	24500086	37007	6,6	1,3	8,2	0,0	198	99	0.000756647	0.0307008	0.75,0.5	1.0,1.0	-0.375
37027	ENSMUSG00000061613.13	U2af1	chr17	-	31651645	31652018	31651645	31651712	31652501	31652568	37027	54140	28,40	64,55	8,6	198	99	0.000517301	0.023331	0.491,0.636	0.8,0.821	-0.247
37045	ENSMUSG00000027566.15	Psma7	chr2	-	180036373	180036839	180036373	180036576	180036937	180037000	37045	3,5	0,0	5,3	4,2	198	99	2.28483e-06	0.000276104	1.0,1.0	0.385,0.429	0.593
37100	ENSMUSG00000027569.15	Mrgbp	chr2	+	180584601	180584871	180584796	180584871	180584405	180584487	37100	73119	128160	58,53	28,32	198	99	7.77192e-07	0.000110421	0.222,0.271	0.509,0.453	-0.234
37126	ENSMUSG00000023191.9	P3h3	chr6	-	124854310	124854452	124854310	124854390	124854847	124854979	37126	17,27	8,4	4,8	0,0	161	99	4.15865e-05	0.00319957	0.566,0.806	1.0,1.0	-0.314
37136	ENSMUSG00000028211.11	Trp53inp1	chr4	+	11165089	11165447	11165293	11165447	11164458	11164569	37136	173240	11,28	76,84	2,1	198	99	0.000129106	0.00796303	0.887,0.811	0.95,0.977	-0.115
37310	ENSMUSG00000048772.15	Tmem53	chr4	+	117265721	117265975	117265859	117265975	117252041	117252155	37310	1,1	0,0	0,1	2,0	198	99	0.00119564	0.0431926	1.0,1.0	0.0,1.0	0.5
37399	ENSMUSG00000020220.16	Vps13d	chr4	-	145126409	145126796	145126409	145126465	145127936	145128049	37399	8,19	2,3	9,5	0,0	198	99	0.000578207	0.0253829	0.667,0.76	1.0,1.0	-0.286
37547	ENSMUSG00000031691.14	Tnpo2	chr8	+	85038185	85038489	85038377	85038489	85036914	85036977	37547	178293	77116	282230	214184	198	99	1.46304e-05	0.00131703	0.536,0.558	0.397,0.385	0.156
37613	ENSMUSG00000020326.7	Ccng1	chr11	-	40751260	40751515	40751260	40751359	40752103	40752357	37613	35,74	17,27	14,15	27,21	198	99	2.85511e-06	0.000332374	0.507,0.578	0.206,0.263	0.308
37701	ENSMUSG00000029616.9	Erp29	chr5	-	121447140	121447565	121447140	121447295	121452190	121452506	37701	0,1	8,3	6,3	5,5	198	99	0.000406103	0.0194254	0.0,0.143	0.375,0.231	-0.231
37894	ENSMUSG00000023707.13	Ogfod2	chr5	+	124113966	124114462	124114406	124114462	124113428	124113528	37894	29,41	4,4	49,43	0,0	198	99	6.12913e-05	0.00443191	0.784,0.837	1.0,1.0	-0.19
37896	ENSMUSG00000023707.13	Ogfod2	chr5	+	124114705	124114766	124114724	124114766	124114478	124114645	37896	3,2	2,2	1,0	4,5	118	99	0.000558663	0.0247201	0.557,0.456	0.173,0.0	0.42
38008	ENSMUSG00000049971.17	Glt1d1	chr5	+	127691526	127691902	127691735	127691902	127690989	127691110	38008	2,0	34,35	9,7	9,7	198	99	2.05934e-09	5.72367e-07	0.029,0.0	0.333,0.333	-0.319
38152	ENSMUSG00000020526.12	Znhit3	chr11	-	84914210	84914283	84914210	84914280	84916098	84916130	38152	7,7	4,5	2,0	6,6	102	99	0.00025812	0.013714	0.629,0.576	0.244,0.0	0.481
38215	ENSMUSG00000026207.16	Speg	chr1	+	75404886	75405147	75404930	75405147	75402297	75402473	38215	25,25	1,5	14,19	0,0	143	99	0.000917179	0.0356122	0.945,0.776	1.0,1.0	-0.139
38231	ENSMUSG00000057691.8	Zfp746	chr6	-	48083092	48083219	48083092	48083174	48083305	48083605	38231	7,23	81145	41,24	29,44	144	99	7.97051e-08	1.52779e-05	0.056,0.098	0.493,0.273	-0.306
38445	ENSMUSG00000019494.14	Cops6	chr5	+	138163491	138163609	138163511	138163609	138163326	138163419	38445	5,4	0,0	6,3	8,1	119	99	2.00241e-06	0.00025053	1.0,1.0	0.384,0.714	0.451
38456	ENSMUSG00000085227.1	6330418K02Rik	chr5	+	138265427	138265859	138265756	138265859	138264107	138264153	38456	16,15	2,6	3,3	0,0	198	99	2.32616e-05	0.0019779	0.8,0.556	1.0,1.0	-0.322
38466	ENSMUSG00000036817.14	Sun1	chr5	+	139210083	139210327	139210193	139210327	139200684	139200699	38466	3,6	3,1	6,5	0,0	198	99	0.000398576	0.0192033	0.333,0.75	1.0,1.0	-0.459
38517	ENSMUSG00000048988.8	Elfn1	chr5	+	139970977	139971050	139970980	139971050	139908473	139908813	38517	5,8	0,6	3,1	0,0	102	99	0.00099786	0.0376058	1.0,0.564	1.0,1.0	-0.218
38547	ENSMUSG00000029570.5	Lfng	chr5	+	140612327	140612656	140612502	140612656	140611849	140611898	38547	8,4	1,3	6,1	0,0	198	99	0.000884714	0.0347248	0.8,0.4	1.0,1.0	-0.4
38554	ENSMUSG00000000148.17	Brat1	chr5	+	140709863	140710010	140709903	140710010	140705952	140706096	38554	6,9	4,1	2,2	0,0	139	99	0.00029151	0.0151442	0.517,0.865	1.0,1.0	-0.309
38560	ENSMUSG00000000148.17	Brat1	chr5	+	140712504	140712877	140712533	140712877	140710137	140710292	38560	0,0	1,1	4,1	0,0	128	99	3.85836e-09	9.91799e-07	0.0,0.0	1.0,1.0	-1
38603	ENSMUSG00000046658.16	Zfp316	chr5	-	143262792	143263206	143262792	143262861	143263295	143263422	38603	43,68	6,2	15,9	0,0	198	99	0.00121032	0.0436518	0.782,0.944	1.0,1.0	-0.137
38693	ENSMUSG00000029625.16	Cpsf4	chr5	+	145178535	145178928	145178832	145178928	145177229	145177302	38693	37,52	187238	40,50	64,53	198	99	1.83865e-09	5.14243e-07	0.09,0.098	0.238,0.321	-0.185
38694	ENSMUSG00000029625.16	Cpsf4	chr5	+	145178535	145178928	145178835	145178928	145177229	145177302	38694	44,56	110179	43,52	47,44	198	99	2.24762e-07	3.95066e-05	0.167,0.135	0.314,0.371	-0.192
38717	ENSMUSG00000029634.15	Rnf6	chr5	-	146220401	146220763	146220401	146220484	146221219	146221555	38717	21,40	214357	22,20	43,47	198	99	2.31453e-08	5.14636e-06	0.047,0.053	0.204,0.175	-0.14
38736	ENSMUSG00000029640.17	Usp12	chr5	-	146751892	146752301	146751892	146751969	146754369	146754599	38736	18,13	309401	34,29	74,76	198	99	0	0	0.028,0.016	0.187,0.16	-0.151
38764	ENSMUSG00000063065.13	Mapk3	chr7	+	126760538	126760913	126760654	126760913	126759659	126759818	38764	0,0	1,3	6,1	2,3	198	99	0.000139837	0.00843301	0.0,0.0	0.6,0.143	-0.371
38863	ENSMUSG00000004934.14	Pias4	chr10	-	81157932	81158413	81157932	81158009	81163784	81164190	38863	9,12	0,1	27,18	5,8	198	99	0.00038865	0.0188271	1.0,0.857	0.73,0.529	0.299
38898	ENSMUSG00000015112.15	Slc25a13	chr6	-	6109936	6110024	6109936	6110021	6113937	6114022	38898	37,43	89176	15,9	148105	102	99	5.85926e-06	0.000603151	0.287,0.192	0.09,0.077	0.156
38951	ENSMUSG00000019373.11	Cops3	chr11	-	59823748	59824094	59823748	59823824	59824274	59824448	38951	4,8	2,6	4,2	0,0	198	99	6.85788e-07	0.000101313	0.5,0.4	1.0,1.0	-0.55
38983	ENSMUSG00000045983.16	Eif4g1	chr16	+	20673919	20674314	20674227	20674314	20672822	20672876	38983	40,73	11,11	29,27	67,57	198	99	5.55112e-16	4.18404e-13	0.645,0.768	0.178,0.191	0.522
38985	ENSMUSG00000045983.16	Eif4g1	chr16	+	20673942	20674314	20674227	20674314	20672822	20672876	38985	42,73	11,11	26,27	67,57	198	99	0	0	0.656,0.768	0.163,0.191	0.535
39024	ENSMUSG00000045983.16	Eif4g1	chr16	+	20687220	20687462	20687380	20687462	20686759	20686932	39024	81119	9,2	34,38	0,0	198	99	0.000651713	0.0274188	0.818,0.967	1.0,1.0	-0.108
39121	ENSMUSG00000074165.10	Zfp788	chr7	+	41647482	41647617	41647490	41647617	41634647	41634745	39121	4,8	0,7	1,2	0,0	107	99	0.000660415	0.0276541	1.0,0.514	1.0,1.0	-0.243
39265	ENSMUSG00000030432.12	Rpl28	chr7	+	4793760	4794177	4794049	4794177	4793592	4793626	39265	43,57	13,20	15,11	37,37	198	99	2.921e-13	1.61707e-10	0.623,0.588	0.169,0.129	0.456
39324	ENSMUSG00000043243.15	Fam129c	chr8	+	71605606	71605718	71605616	71605718	71604960	71605035	39324	13,11	9,0	3,2	0,0	109	99	0.000667379	0.0279194	0.567,1.0	1.0,1.0	-0.217
39432	ENSMUSG00000027253.15	Lrp4	chr2	+	91485753	91485962	91485784	91485962	91481857	91481980	39432	4,16	4,5	9,6	0,1	130	99	0.000537737	0.0240575	0.432,0.709	1.0,0.82	-0.339
39457	ENSMUSG00000034566.10	Atp5h	chr11	-	115415688	115415896	115415688	115415843	115416014	115416077	39457	12,18	1,4	14,6	0,0	152	99	0.00139081	0.0482819	0.887,0.746	1.0,1.0	-0.183
39458	ENSMUSG00000034566.10	Atp5h	chr11	-	115415688	115415903	115415688	115415843	115416014	115416077	39458	13,14	1,4	14,6	0,0	159	99	0.000828047	0.0330285	0.89,0.685	1.0,1.0	-0.212
39499	ENSMUSG00000021748.9	Pdhb	chr14	-	8169344	8169765	8169344	8169436	8170160	8170446	39499	15,29	1,0	46,21	23,7	198	99	1.56304e-07	2.87225e-05	0.882,1.0	0.5,0.6	0.391
39630	ENSMUSG00000067148.15	Polr1c	chr17	-	46244516	46244941	46244516	46244894	46245030	46245150	39630	2,14	0,0	12,6	1,5	146	99	8.67891e-05	0.00581618	1.0,1.0	0.891,0.449	0.33
39741	ENSMUSG00000039205.16	Ciz1	chr2	+	32363539	32363656	32363622	32363656	32363060	32363158	39741	46,60	5,16	44,27	24,18	182	99	0.00120482	0.0434889	0.833,0.671	0.499,0.449	0.278
39770	ENSMUSG00000041408.18	Wapl	chr14	+	34694964	34695105	34695004	34695105	34691681	34692734	39770	71152	110119	93,77	26,24	139	99	6.92356e-07	0.000101313	0.315,0.476	0.718,0.696	-0.311
39780	ENSMUSG00000064043.13	Trerf1	chr17	+	47319351	47319618	47319507	47319618	47317770	47317921	39780	27,31	8,2	23,9	0,0	198	99	4.76966e-05	0.00358289	0.628,0.886	1.0,1.0	-0.243
39924	ENSMUSG00000068329.12	Htra2	chr6	-	83052472	83052770	83052472	83052542	83053037	83053070	39924	8,14	9,20	9,8	1,0	198	99	4.23122e-07	6.67242e-05	0.308,0.259	0.818,1.0	-0.626
39925	ENSMUSG00000068329.12	Htra2	chr6	-	83052472	83052821	83052472	83052542	83053037	83053070	39925	6,13	9,20	7,10	1,0	198	99	2.59798e-07	4.49542e-05	0.25,0.245	0.778,1.0	-0.641
39926	ENSMUSG00000068329.12	Htra2	chr6	-	83052472	83052828	83052472	83052542	83053037	83053070	39926	7,15	9,20	8,8	1,0	198	99	8.07495e-07	0.000113637	0.28,0.273	0.8,1.0	-0.623
39927	ENSMUSG00000068329.12	Htra2	chr6	-	83052472	83052861	83052472	83052542	83053037	83053070	39927	8,20	9,20	7,11	1,0	198	99	1.54528e-06	0.000202114	0.308,0.333	0.778,1.0	-0.569
39998	ENSMUSG00000001436.15	Slc19a1	chr10	+	77044622	77044720	77044641	77044720	77042790	77042974	39998	6,12	5,12	0,1	2,2	118	99	0.00123341	0.044305	0.502,0.456	0.0,0.296	0.331
40029	ENSMUSG00000030016.14	Zfp638	chr6	+	83976210	83976350	83976285	83976350	83972245	83972283	40029	17,23	0,0	1,0	1,2	174	99	2.14393e-06	0.000263372	1.0,1.0	0.363,0.0	0.819
40173	ENSMUSG00000002871.14	Tpra1	chr6	+	88910574	88910877	88910796	88910877	88910340	88910401	40173	19,20	4,4	10,21	0,0	198	99	1.90667e-05	0.00166254	0.704,0.714	1.0,1.0	-0.291
40200	ENSMUSG00000049555.10	Tmie	chr9	-	110873795	110874098	110873795	110874026	110875427	110875537	40200	0,0	1,2	2,2	2,0	171	99	0.000525836	0.0236201	0.0,0.0	0.367,1.0	-0.683
40213	ENSMUSG00000049555.10	Tmie	chr9	-	110873795	110874101	110873795	110874098	110875627	110876021	40213	0,2	9,4	7,3	2,0	102	99	3.48998e-06	0.00039693	0.0,0.327	0.773,1.0	-0.723
40215	ENSMUSG00000049555.10	Tmie	chr9	-	110873795	110874177	110873795	110874101	110875627	110876021	40215	3,7	0,2	1,1	7,3	175	99	3.62512e-05	0.00284821	1.0,0.664	0.075,0.159	0.715
40273	ENSMUSG00000059439.15	Bcas3	chr11	+	85821775	85822112	85822021	85822112	85813999	85814065	40273	2,0	5,5	4,2	0,1	198	99	1.16944e-05	0.00109025	0.167,0.0	1.0,0.5	-0.666
40298	ENSMUSG00000030067.17	Foxp1	chr6	-	99075853	99075958	99075853	99075949	99162838	99163029	40298	22,4	8,24	0,0	6,3	108	99	2.31968e-05	0.00197617	0.716,0.133	0.0,0.0	0.424
40632	ENSMUSG00000024137.9	E4f1	chr17	-	24446781	24447006	24446781	24446841	24447089	24447210	40632	93159	12,12	159149	39,47	198	99	1.91949e-05	0.00167044	0.795,0.869	0.671,0.613	0.19
40707	ENSMUSG00000025938.16	Slco5a1	chr1	-	12938988	12939200	12938988	12939127	12943979	12944112	40707	65123	8,2	41,20	0,0	172	99	0.00138013	0.0480238	0.824,0.973	1.0,1.0	-0.102
40714	ENSMUSG00000036054.15	Sugp2	chr8	+	70261015	70261317	70261230	70261317	70260468	70260589	40714	11,27	43,60	3,3	41,25	198	99	0.00029771	0.0153587	0.113,0.184	0.035,0.057	0.102
40794	ENSMUSG00000030346.16	Rad51ap1	chr6	-	126924917	126925119	126924917	126925067	126926358	126926517	40794	5,9	105172	25,16	47,40	151	99	3.4347e-12	1.6249e-09	0.03,0.033	0.259,0.208	-0.202
40901	ENSMUSG00000056673.14	Kdm5d	chrY	+	910451	910750	910685	910750	900478	900613	40901	4,4	0,0	0,3	1,2	198	99	0.000500107	0.02274	1.0,1.0	0.0,0.429	0.785
41054	ENSMUSG00000030207.15	Fam234b	chr6	+	135211804	135211933	135211834	135211933	135209032	135209431	41054	3,7	12,18	0,0	10,9	129	99	5.37654e-05	0.00396508	0.161,0.23	0.0,0.0	0.196
41065	ENSMUSG00000022752.9	Tomm70a	chr16	+	57150481	57150774	57150675	57150774	57149819	57149942	41065	1,1	0,0	1,1	3,2	198	99	1.83464e-07	3.30309e-05	1.0,1.0	0.143,0.2	0.829
41155	ENSMUSG00000030279.15	C2cd5	chr6	-	143019195	143019429	143019195	143019399	143020323	143020374	41155	41,81	4,7	18,9	0,0	129	99	0.000914396	0.0355759	0.887,0.899	1.0,1.0	-0.107
41161	ENSMUSG00000040370.13	Etfrf1	chr6	+	145214521	145215271	145215183	145215271	145211133	145211400	41161	4,9	3,1	8,4	0,0	198	99	0.00109687	0.0406754	0.4,0.818	1.0,1.0	-0.391
41293	ENSMUSG00000035585.16	Tsen34	chr7	+	3694931	3695093	3694940	3695093	3694597	3694844	41293	2,3	0,0	10,13	4,2	108	99	0.00025797	0.013714	1.0,1.0	0.696,0.856	0.224
41497	ENSMUSG00000028603.15	Scp2	chr4	-	108047589	108047809	108047589	108047669	108071256	108071419	41497	4,15	0,1	8,2	48,52	198	99	1.11022e-16	9.3154e-14	1.0,0.882	0.077,0.019	0.893
41548	ENSMUSG00000021377.15	Dek	chr13	-	47101622	47102090	47101622	47102069	47105571	47105830	41548	4,1	0,0	2,0	3,1	120	99	8.0839e-06	0.000798741	1.0,1.0	0.355,0.0	0.823
41657	ENSMUSG00000056952.13	Tatdn2	chr6	+	113709821	113710205	113710040	113710205	113709459	113709643	41657	71115	301463	185165	237197	198	99	2.22045e-16	1.79533e-13	0.105,0.11	0.281,0.295	-0.181
41694	ENSMUSG00000050891.10	Tatdn1	chr15	-	58916167	58916362	58916167	58916192	58921139	58921182	41694	176231	9,18	119,87	26,22	198	99	2.07584e-06	0.000256424	0.907,0.865	0.696,0.664	0.206
41779	ENSMUSG00000027667.13	Zfp639	chr3	+	32513008	32513192	32513039	32513192	32510663	32510732	41779	12,13	7,1	3,3	0,0	130	99	0.000131791	0.00803942	0.566,0.908	1.0,1.0	-0.263
41852	ENSMUSG00000030403.9	Vasp	chr7	-	19260660	19260681	19260660	19260678	19260823	19261076	41852	562852	81112	186184	55,58	102	99	2.16067e-06	0.000264697	0.871,0.881	0.766,0.755	0.116
41878	ENSMUSG00000002983.17	Relb	chr7	-	19615558	19615851	19615558	19615729	19616345	19617403	41878	0,0	1,5	1,1	0,0	198	99	3.78088e-09	9.77723e-07	0.0,0.0	1.0,1.0	-1
41926	ENSMUSG00000000131.15	Xpo6	chr7	-	126104703	126104931	126104703	126104789	126105100	126105199	41926	43,61	1,10	16,25	0,0	198	99	0.000225911	0.0124644	0.956,0.753	1.0,1.0	-0.145
41985	ENSMUSG00000054342.8	Kcnn4	chr7	+	24384545	24384759	24384721	24384759	24384113	24384182	41985	71,87	261384	44,58	64,54	198	99	1.48382e-09	4.28477e-07	0.12,0.102	0.256,0.349	-0.192
42036	ENSMUSG00000057177.12	Gsk3a	chr7	-	25229464	25229707	25229464	25229520	25229850	25230040	42036	109223	18,44	150140	10,7	198	99	2.67355e-05	0.00220172	0.752,0.717	0.882,0.909	-0.161
42395	ENSMUSG00000037103.8	Dcaf15	chr8	-	84101931	84102309	84101931	84102261	84102745	84102881	42395	2,7	1,2	0,0	3,2	147	99	1.7269e-07	3.12175e-05	0.574,0.702	0.0,0.0	0.638
42429	ENSMUSG00000060601.13	Nr1h2	chr7	-	44551954	44552245	44551954	44552234	44552506	44552620	42429	87125	14,14	27,32	1,0	110	99	9.9248e-05	0.00645257	0.848,0.889	0.96,1.0	-0.111
42430	ENSMUSG00000060601.13	Nr1h2	chr7	-	44551954	44552343	44551954	44552234	44552506	44552620	42430	45,63	14,14	28,26	1,0	198	99	1.03929e-06	0.000143087	0.616,0.692	0.933,1.0	-0.313
42453	ENSMUSG00000038535.17	Zfp280d	chr9	+	72298681	72298848	72298719	72298848	72295974	72296035	42453	7,10	1,0	5,7	4,3	137	99	0.000247574	0.0133296	0.835,1.0	0.475,0.628	0.366
42475	ENSMUSG00000036459.15	Wtip	chr7	-	34118674	34118984	34118674	34118805	34119138	34119206	42475	29,59	5,5	20,25	0,0	198	99	8.68437e-05	0.00581618	0.744,0.855	1.0,1.0	-0.201
42545	ENSMUSG00000029267.17	Mtf2	chr5	+	108104028	108104318	108104265	108104318	108100812	108100983	42545	6,14	2,0	2,1	4,1	198	99	0.000348133	0.0173365	0.6,1.0	0.2,0.333	0.534
42621	ENSMUSG00000046364.14	Rpl27a	chr7	+	109520404	109520567	109520446	109520567	109519917	109519993	42621	3,2	0,0	11,12	4,2	141	99	0.00013995	0.00843301	1.0,1.0	0.659,0.808	0.266
42684	ENSMUSG00000053799.7	Exoc6	chr19	+	37571575	37571640	37571598	37571640	37570382	37570554	42684	1,5	0,0	2,2	3,2	122	99	6.79743e-06	0.000686427	1.0,1.0	0.351,0.448	0.601
42696	ENSMUSG00000032235.15	Ice2	chr9	+	69428303	69428574	69428350	69428574	69426850	69426901	42696	1,3	0,1	0,0	3,1	146	99	1.86978e-06	0.000237568	1.0,0.67	0.0,0.0	0.835
42707	ENSMUSG00000038782.7	1700028J19Rik	chr7	-	44232355	44232556	44232355	44232462	44246582	44246695	42707	3,14	0,0	0,1	2,0	193	99	0.0012911	0.0456399	1.0,1.0	0.0,1.0	0.5
42717	ENSMUSG00000101166.6	Gm28496	chr7	+	44247909	44248295	44248251	44248295	44247250	44247416	42717	130154	72,87	47,35	8,7	198	99	7.98139e-05	0.00544821	0.474,0.47	0.746,0.714	-0.258
42758	ENSMUSG00000002205.16	Vrk3	chr7	+	44759024	44759407	44759185	44759407	44757745	44757895	42758	1,0	3,2	7,1	0,2	198	99	0.000643471	0.0271751	0.143,0.0	1.0,0.2	-0.528
42766	ENSMUSG00000011096.17	Akt1s1	chr7	+	44851818	44851893	44851823	44851893	44850395	44850434	42766	1,1	0,0	1,0	3,1	104	99	1.62721e-07	2.96565e-05	1.0,1.0	0.241,0.0	0.879
42986	ENSMUSG00000006763.14	Saal1	chr7	-	46702182	46702535	46702182	46702492	46702620	46702680	42986	46,73	7,16	40,27	1,0	142	99	4.08332e-06	0.000448466	0.821,0.761	0.965,1.0	-0.192
43151	ENSMUSG00000087159.7	Gm15246	chrX	+	169323001	169323101	169323004	169323101	169322749	169322842	43151	0,0	3,1	4,4	4,2	102	99	6.27643e-07	9.3662e-05	0.0,0.0	0.493,0.66	-0.577
43252	ENSMUSG00000015133.17	Lrrk1	chr7	-	66341531	66342006	66341531	66341581	66342761	66342925	43252	2,0	1,7	15,31	7,6	198	99	0.000689008	0.0285291	0.5,0.0	0.517,0.721	-0.369
43326	ENSMUSG00000024566.10	Atp9b	chr18	-	80886707	80887008	80886707	80886955	80891814	80891923	43326	0,0	2,1	3,2	0,0	152	99	1.75277e-09	4.93327e-07	0.0,0.0	1.0,1.0	-1
43334	ENSMUSG00000078515.4	Ddi2	chr4	-	141709265	141709414	141709265	141709338	141713396	141713526	43334	1,22	0,0	3,2	3,1	175	99	6.24714e-05	0.00448805	1.0,1.0	0.361,0.531	0.554
43537	ENSMUSG00000032363.15	Adamts7	chr9	+	90180624	90180771	90180700	90180771	90179322	90179472	43537	57,66	11,25	24,23	20,19	175	99	0.00123672	0.0443522	0.746,0.599	0.404,0.406	0.267
43541	ENSMUSG00000032363.15	Adamts7	chr9	+	90191610	90191962	90191835	90191962	90191364	90191500	43541	2,1	38,61	9,5	26,17	198	99	1.16391e-05	0.00108738	0.026,0.008	0.148,0.128	-0.121
43629	ENSMUSG00000033379.13	Atp6v0b	chr4	-	117885628	117885984	117885628	117885917	117886067	117886145	43629	2,4	0,0	5,5	5,7	166	99	4.84152e-07	7.42421e-05	1.0,1.0	0.374,0.299	0.663
43634	ENSMUSG00000033379.13	Atp6v0b	chr4	-	117885803	117886163	117885803	117885873	117886275	117886558	43634	63,77	0,1	111,68	11,4	198	99	3.43729e-05	0.00272957	1.0,0.975	0.835,0.895	0.123
43638	ENSMUSG00000033379.13	Atp6v0b	chr4	-	117886589	117886694	117886589	117886638	117887179	117887287	43638	117140	17,18	199178	5,11	155	99	0.00015883	0.00933045	0.815,0.832	0.962,0.912	-0.114
43738	ENSMUSG00000030704.14	Rab6a	chr7	+	100636602	100636761	100636672	100636761	100634644	100634738	43738	0,1	4,0	1,1	0,0	169	99	0.000183144	0.0105193	0.0,1.0	1.0,1.0	-0.5
43802	ENSMUSG00000032737.13	Inppl1	chr7	-	101837159	101837373	101837159	101837269	101837720	101837803	43802	1,1	1,1	13,10	0,1	198	99	0.000454391	0.0210707	0.333,0.333	1.0,0.833	-0.583
43806	ENSMUSG00000001089.14	Luzp1	chr4	+	136545206	136545402	136545240	136545402	136540355	136543518	43806	1,13	3,3	1,2	0,0	133	99	3.55047e-05	0.0027945	0.199,0.763	1.0,1.0	-0.519
43861	ENSMUSG00000036352.16	Ubac1	chr2	-	26015954	26016143	26015954	26016048	26016295	26016416	43861	2,0	4,2	1,4	0,1	194	99	6.44053e-05	0.00458991	0.203,0.0	1.0,0.671	-0.734
43875	ENSMUSG00000032332.17	Col12a1	chr9	-	79714904	79715152	79714904	79715059	79715363	79715471	43875	1,1	13,9	41,43	5,9	192	99	7.54952e-15	4.7961e-12	0.038,0.054	0.809,0.711	-0.714
43878	ENSMUSG00000032332.17	Col12a1	chr9	-	79714904	79715152	79714904	79715119	79715363	79715471	43878	1,1	2,8	41,43	0,2	132	99	1.21081e-12	6.11871e-10	0.273,0.086	1.0,0.942	-0.791
43907	ENSMUSG00000015126.9	Tsr3	chr17	+	25241039	25241257	25241067	25241257	25240443	25240663	43907	0,8	6,4	3,1	0,0	127	99	3.56443e-07	5.78504e-05	0.0,0.609	1.0,1.0	-0.696
43930	ENSMUSG00000029416.17	Slc15a4	chr5	-	127604537	127604701	127604537	127604648	127608771	127609061	43930	118190	113181	241209	49,43	152	99	0	0	0.405,0.406	0.762,0.76	-0.355
43938	ENSMUSG00000033313.11	Fbxl8	chr8	+	105266694	105267165	105266969	105267165	105264681	105264760	43938	63,83	4,0	40,57	12,4	198	99	0.000943001	0.0361884	0.887,1.0	0.625,0.877	0.193
43976	ENSMUSG00000032193.9	Ldlr	chr9	+	21731746	21731869	21731749	21731869	21723640	21723844	43976	60,81	3,2	53,48	7,15	102	99	4.86993e-05	0.00365203	0.951,0.975	0.88,0.756	0.145
44030	ENSMUSG00000028556.15	Dock7	chr4	-	98946616	98946754	98946616	98946709	98953865	98953923	44030	47,59	0,0	18,18	0,6	144	99	0.000750341	0.0305006	1.0,1.0	1.0,0.673	0.163
44123	ENSMUSG00000026131.19	Dst	chr1	+	34196873	34197353	34197200	34197353	34195827	34196061	44123	1,2	103143	3,4	16,8	198	99	0.000286479	0.0149177	0.005,0.007	0.086,0.2	-0.137
44413	ENSMUSG00000020827.18	Mink1	chr11	+	70606647	70607144	70606919	70607144	70606047	70606164	44413	17,24	109174	18,8	24,25	198	99	0.000371721	0.0182657	0.072,0.065	0.273,0.138	-0.137
44428	ENSMUSG00000046897.17	Zfp740	chr15	+	102208029	102208361	102208271	102208361	102207770	102207920	44428	66110	149242	77,71	46,46	198	99	1.09314e-11	4.71959e-09	0.181,0.185	0.456,0.436	-0.263
44436	ENSMUSG00000031878.18	Nae1	chr8	-	104524334	104524470	104524334	104524426	104526279	104526389	44436	2,8	1,3	9,5	0,0	143	99	0.000633762	0.026944	0.581,0.649	1.0,1.0	-0.385
44445	ENSMUSG00000031878.18	Nae1	chr8	-	104527082	104527162	104527082	104527118	104530055	104530116	44445	143226	0,1	110,87	9,9	143	99	5.21695e-08	1.04503e-05	1.0,0.994	0.894,0.87	0.115
44479	ENSMUSG00000014859.9	E2f4	chr8	+	105298071	105298384	105298284	105298384	105297716	105297875	44479	0,4	3,5	5,8	2,0	198	99	0.000643476	0.0271751	0.0,0.286	0.556,1.0	-0.635
44498	ENSMUSG00000032637.15	Atxn2l	chr7	-	126491707	126492215	126491707	126492192	126492811	126493001	44498	8,20	4,2	6,3	0,0	122	99	0.000297353	0.015358	0.619,0.89	1.0,1.0	-0.246
44545	ENSMUSG00000030697.7	Ppp4c	chr7	-	126787219	126787556	126787219	126787307	126788116	126788218	44545	98136	4,10	43,37	0,0	198	99	0.000200505	0.0113153	0.925,0.872	1.0,1.0	-0.101
44546	ENSMUSG00000030697.7	Ppp4c	chr7	-	126787219	126787593	126787219	126787307	126788116	126788218	44546	98135	4,10	45,37	0,0	198	99	0.000186625	0.0106537	0.925,0.871	1.0,1.0	-0.102
44547	ENSMUSG00000030697.7	Ppp4c	chr7	-	126787219	126787556	126787219	126787346	126788116	126788218	44547	38,57	2,17	22,19	0,1	198	99	0.000369311	0.0181673	0.905,0.626	1.0,0.905	-0.187
44548	ENSMUSG00000030697.7	Ppp4c	chr7	-	126787219	126787593	126787219	126787346	126788116	126788218	44548	38,56	2,17	24,19	0,1	198	99	0.000319171	0.0161624	0.905,0.622	1.0,0.905	-0.189
44580	ENSMUSG00000030672.12	Mylpf	chr7	+	127211730	127211763	127211748	127211763	127209283	127209398	44580	2,3	2,1	1,0	2,4	117	99	0.000691836	0.0286195	0.458,0.717	0.297,0.0	0.439
44582	ENSMUSG00000030672.12	Mylpf	chr7	+	127211748	127211763	127211751	127211763	127209283	127209398	44582	2,1	4,1	2,4	0,0	102	99	3.51921e-06	0.000398217	0.327,0.493	1.0,1.0	-0.59
44595	ENSMUSG00000045251.13	Zfp688	chr7	-	127421404	127421673	127421404	127421518	127421808	127422034	44595	18,14	24,28	12,20	5,0	198	99	0.000198288	0.011233	0.273,0.2	0.545,1.0	-0.536
44596	ENSMUSG00000045251.13	Zfp688	chr7	-	127421404	127421699	127421404	127421518	127421808	127422034	44596	19,14	24,28	12,19	5,0	198	99	0.000278337	0.0146135	0.284,0.2	0.545,1.0	-0.53
44820	ENSMUSG00000019795.17	Pcmt1	chr10	-	7648466	7648663	7648466	7648660	7649050	7649155	44820	6,9	2,15	0,0	5,6	102	99	1.41272e-06	0.000186975	0.744,0.368	0.0,0.0	0.556
44827	ENSMUSG00000031068.8	Glrx3	chr7	+	137458842	137459295	137459194	137459295	137453412	137453614	44827	3,5	7,9	0,0	3,2	198	99	0.00037417	0.0183263	0.176,0.217	0.0,0.0	0.197
44945	ENSMUSG00000025508.13	Rplp2	chr7	+	141450963	141451350	141451231	141451350	141448725	141448774	44945	96123	0,5	125106	16,12	198	99	2.85683e-05	0.00233535	1.0,0.925	0.796,0.815	0.157
44980	ENSMUSG00000004056.15	Akt2	chr7	+	27615749	27616155	27615864	27616155	27608661	27608753	44980	3,4	0,0	10,6	6,6	198	99	7.95258e-07	0.00011227	1.0,1.0	0.455,0.333	0.606
44984	ENSMUSG00000004056.15	Akt2	chr7	+	27615864	27616155	27616037	27616155	27608661	27608753	44984	0,0	2,2	6,6	4,11	198	99	7.51743e-05	0.00521049	0.0,0.0	0.429,0.214	-0.322
45070	ENSMUSG00000031075.18	Ano1	chr7	-	144618848	144619313	144618848	144618920	144621667	144621750	45070	14,23	1,1	7,7	22,35	198	99	1.11022e-16	9.3154e-14	0.875,0.92	0.137,0.091	0.783
45071	ENSMUSG00000031075.18	Ano1	chr7	-	144648023	144648345	144648023	144648079	144648574	144648640	45071	20,28	176278	31,15	45,61	198	99	3.00511e-06	0.00034711	0.054,0.048	0.256,0.109	-0.132
45076	ENSMUSG00000031075.18	Ano1	chr7	-	144648171	144648640	144648171	144648345	144650502	144650554	45076	167183	2,9	61,69	15,6	198	99	0.000131262	0.00801819	0.977,0.91	0.67,0.852	0.182
45088	ENSMUSG00000039176.17	Polg	chr7	-	79459173	79459606	79459173	79459300	79459688	79459871	45088	12,14	5,5	4,6	0,0	198	99	9.88941e-06	0.000941718	0.545,0.583	1.0,1.0	-0.436
45138	ENSMUSG00000019470.12	Xab2	chr8	-	3610846	3611190	3610846	3611018	3611393	3611584	45138	6,15	0,0	4,7	4,1	198	99	3.48948e-05	0.00275625	1.0,1.0	0.333,0.778	0.445
45180	ENSMUSG00000002949.15	Timm44	chr8	-	4266112	4266473	4266112	4266451	4266555	4266680	45180	2,4	0,0	4,1	4,5	121	99	3.22979e-08	6.87218e-06	1.0,1.0	0.45,0.141	0.705
45327	ENSMUSG00000040856.17	Dlk1	chr12	+	109460111	109460360	109460195	109460360	109459606	109459832	45327	2,0	0,4	2,3	0,0	183	99	0.00137235	0.0479031	1.0,0.0	1.0,1.0	-0.5
45508	ENSMUSG00000036501.7	Fam13b	chr18	-	34464162	34464557	34464162	34464336	34465155	34465220	45508	19,33	10,11	20,12	1,1	198	99	0.00048408	0.02217	0.487,0.6	0.909,0.857	-0.34
45509	ENSMUSG00000036501.7	Fam13b	chr18	-	34464162	34464560	34464162	34464336	34465155	34465220	45509	19,32	10,11	20,13	1,1	198	99	0.000336879	0.0169086	0.487,0.593	0.909,0.867	-0.348
45517	ENSMUSG00000046111.17	Cep295	chr9	-	15317458	15317763	15317458	15317593	15317918	15318056	45517	3,5	1,2	1,2	0,0	198	99	0.00137643	0.0479745	0.6,0.556	1.0,1.0	-0.422
45643	ENSMUSG00000031592.10	Pcm1	chr8	+	41257895	41258036	41257905	41258036	41255995	41256110	45643	0,0	7,3	2,5	0,2	109	99	8.83334e-09	2.08946e-06	0.0,0.0	1.0,0.694	-0.847
45719	ENSMUSG00000031627.9	Irf2	chr8	+	46837673	46837798	46837679	46837798	46818790	46818908	45719	18,40	0,0	17,12	4,2	105	99	0.000317862	0.0161178	1.0,1.0	0.8,0.85	0.175
45772	ENSMUSG00000038215.15	Cep44	chr8	-	56549730	56550194	56549730	56550121	56550544	56551047	45772	5,13	14,56	15,5	6,1	172	99	2.24276e-06	0.000271759	0.171,0.118	0.59,0.742	-0.521
45856	ENSMUSG00000036246.14	Gmip	chr8	+	69813181	69813291	69813185	69813291	69811532	69811640	45856	1,7	0,1	2,0	2,1	103	99	0.00121386	0.0437441	1.0,0.871	0.49,0.0	0.691
46016	ENSMUSG00000007610.15	Gtpbp3	chr8	+	71490894	71491196	71491065	71491196	71490334	71490537	46016	108209	53,80	160125	32,28	198	99	0.000406243	0.0194254	0.505,0.566	0.714,0.691	-0.167
46216	ENSMUSG00000057672.16	Pkn1	chr8	-	83680953	83681343	83680953	83681097	83683398	83683593	46216	0,2	2,3	2,8	0,0	198	99	2.43049e-09	6.71328e-07	0.0,0.25	1.0,1.0	-0.875
46223	ENSMUSG00000012889.8	Podnl1	chr8	+	84128471	84128726	84128569	84128726	84127227	84127321	46223	8,9	4,13	2,3	0,0	197	99	3.58062e-06	0.000402097	0.501,0.258	1.0,1.0	-0.621
46230	ENSMUSG00000012889.8	Podnl1	chr8	+	84128471	84128726	84128593	84128726	84127784	84127894	46230	18,28	1,6	3,10	0,0	198	99	0.000195589	0.0110942	0.9,0.7	1.0,1.0	-0.2
46266	ENSMUSG00000052566.8	Hook2	chr8	+	84993162	84993642	84993574	84993642	84991376	84991449	46266	3,13	3,3	12,10	0,0	198	99	6.95748e-06	0.000698418	0.333,0.684	1.0,1.0	-0.491
46273	ENSMUSG00000052566.8	Hook2	chr8	+	85001154	85001237	85001158	85001237	84998203	84998291	46273	20,32	0,2	5,7	5,4	103	99	9.91242e-06	0.000941892	1.0,0.939	0.49,0.627	0.411
46292	ENSMUSG00000052456.9	Asna1	chr8	-	85019521	85019973	85019521	85019905	85024177	85024325	46292	13,11	7,6	9,13	0,2	167	99	0.00105389	0.0393838	0.524,0.521	1.0,0.794	-0.375
46302	ENSMUSG00000008167.14	Fbxw9	chr8	+	85061906	85062300	85062171	85062300	85060096	85060536	46302	10,9	2,6	3,4	0,0	198	99	3.01507e-06	0.000347358	0.714,0.429	1.0,1.0	-0.428
46349	ENSMUSG00000079469.10	Pigb	chr9	-	73022274	73022486	73022274	73022332	73029565	73029706	46349	7,18	0,1	4,2	2,3	198	99	3.0437e-05	0.00247447	1.0,0.9	0.5,0.25	0.575
46358	ENSMUSG00000057551.10	Zfp317	chr9	+	19641963	19642103	19641987	19642103	19641223	19641254	46358	113188	29,36	64,77	7,1	123	99	6.8085e-05	0.00478847	0.758,0.808	0.88,0.984	-0.149
46394	ENSMUSG00000013858.14	Tmem259	chr10	-	79977962	79978461	79977962	79978424	79978547	79978605	46394	190386	38,51	201165	71,63	136	99	2.70245e-06	0.000317931	0.784,0.846	0.673,0.656	0.15
46586	ENSMUSG00000014786.8	Slc9a5	chr8	+	105355846	105356024	105355932	105356024	105355470	105355549	46586	36,32	3,4	13,27	0,0	185	99	0.000632602	0.0269204	0.865,0.811	1.0,1.0	-0.162
46590	ENSMUSG00000014786.8	Slc9a5	chr8	+	105361488	105361638	105361560	105361638	105359326	105359453	46590	21,48	10,14	10,7	0,0	171	99	4.77361e-06	0.000511524	0.549,0.665	1.0,1.0	-0.393
46614	ENSMUSG00000036270.16	Edc4	chr8	+	105885281	105885533	105885426	105885533	105885032	105885144	46614	0,0	1,1	3,3	0,0	198	99	3.44557e-09	9.01321e-07	0.0,0.0	1.0,1.0	-1
46668	ENSMUSG00000006599.13	Gtf2h1	chr7	+	46803761	46804009	46803799	46804009	46801686	46801840	46668	4,1	4,5	3,4	1,0	137	99	0.000116973	0.00736796	0.419,0.126	0.684,1.0	-0.57
46719	ENSMUSG00000031753.16	Cog4	chr8	+	110868101	110868367	110868239	110868367	110866560	110866727	46719	4,11	10,16	8,2	0,0	198	99	4.39539e-08	9.0913e-06	0.167,0.256	1.0,1.0	-0.788
46796	ENSMUSG00000025158.7	Rfng	chr11	-	120782855	120783160	120782855	120783078	120783267	120783370	46796	66,89	5,8	77,63	1,0	181	99	6.03236e-05	0.00438173	0.878,0.859	0.977,1.0	-0.12
46864	ENSMUSG00000034243.17	Golgb1	chr16	+	36893315	36893438	36893330	36893438	36891366	36891492	46864	43,60	10,7	11,4	0,0	114	99	0.000259781	0.0137693	0.789,0.882	1.0,1.0	-0.164
46957	ENSMUSG00000018800.14	Abca5	chr11	-	110327731	110327936	110327731	110327893	110329136	110329256	46957	20,44	0,0	45,36	8,0	142	99	0.000674197	0.0280989	1.0,1.0	0.797,1.0	0.101
47027	ENSMUSG00000036099.16	Vezt	chr10	-	93985342	93985438	93985342	93985424	93990139	93990287	47027	0,0	3,4	2,2	1,0	113	99	4.19886e-07	6.64496e-05	0.0,0.0	0.637,1.0	-0.819
47059	ENSMUSG00000057193.8	Slc44a2	chr9	+	21342947	21343047	21342967	21343047	21342742	21342866	47059	18,20	0,0	13,2	2,5	119	99	2.52608e-05	0.00210999	1.0,1.0	0.844,0.25	0.453
47078	ENSMUSG00000027752.15	Exosc8	chr3	-	54733657	54733744	54733657	54733731	54734295	54734802	47078	6,19	0,0	11,7	5,6	112	99	4.8882e-07	7.44447e-05	1.0,1.0	0.66,0.508	0.416
47105	ENSMUSG00000110605.1	Gm32856	chr8	+	129281982	129282844	129282475	129282844	129281336	129281397	47105	9,13	21,33	6,6	2,2	198	99	0.00090223	0.0352568	0.176,0.165	0.6,0.6	-0.429
47168	ENSMUSG00000031939.16	Taf1d	chr9	+	15311817	15312104	15311908	15312104	15311492	15311695	47168	152237	66111	606551	133107	190	99	3.19862e-07	5.28945e-05	0.545,0.527	0.704,0.728	-0.18
47244	ENSMUSG00000025781.14	Atp5c1	chr2	-	10063285	10063623	10063285	10063350	10064106	10064311	47244	26,67	2,8	50,32	0,0	198	99	2.39115e-05	0.00202542	0.867,0.807	1.0,1.0	-0.163
47311	ENSMUSG00000006241.16	Ccdc159	chr9	+	21931312	21931787	21931698	21931787	21929307	21929534	47311	0,0	1,1	1,1	0,0	198	99	1.7727e-08	4.02204e-06	0.0,0.0	1.0,1.0	-1
47347	ENSMUSG00000025271.13	Pfkfb1	chrX	+	150589795	150590084	150589939	150590084	150588944	150589044	47347	19,23	7,10	8,5	0,0	198	99	5.60763e-06	0.000581285	0.576,0.535	1.0,1.0	-0.445
47349	ENSMUSG00000025271.13	Pfkfb1	chrX	+	150589939	150590084	150589952	150590084	150588944	150589044	47349	7,10	19,20	0,0	2,3	112	99	0.000110808	0.00705967	0.246,0.307	0.0,0.0	0.276
47412	ENSMUSG00000021704.8	Mtx3	chr13	+	92849329	92849523	92849424	92849523	92848917	92849075	47412	2,4	3,9	2,1	0,0	194	99	2.9388e-07	4.96914e-05	0.254,0.185	1.0,1.0	-0.78
47418	ENSMUSG00000032040.15	Dcps	chr9	-	35125157	35125343	35125157	35125277	35126306	35126417	47418	1,0	1,1	1,1	0,0	165	99	0.000480158	0.0220566	0.375,0.0	1.0,1.0	-0.812
47474	ENSMUSG00000063524.13	Eno1	chr4	+	150240747	150241140	150240957	150241140	150239472	150239566	47474	3,5	0,0	0,0	1,1	198	99	1.54361e-09	4.42868e-07	1.0,1.0	0.0,0.0	1
47478	ENSMUSG00000063524.13	Eno1	chr4	+	150244004	150244368	150244240	150244368	150241044	150241140	47478	57,63	0,1	178128	243242	198	99	0	0	1.0,0.969	0.268,0.209	0.746
47531	ENSMUSG00000087179.8	Gm14230	chr2	-	156833578	156833724	156833578	156833712	156837822	156837913	47531	2,13	2,2	1,0	1,2	111	99	0.000674189	0.0280989	0.471,0.853	0.471,0.0	0.426
47621	ENSMUSG00000021273.11	Fdft1	chr14	-	63159237	63159681	63159237	63159359	63163301	63163485	47621	0,0	2,1	2,4	2,4	198	99	0.000342964	0.0171366	0.0,0.0	0.333,0.333	-0.333
47681	ENSMUSG00000042790.16	Rnf214	chr9	-	45867499	45867844	45867499	45867632	45869178	45869277	47681	3,0	1,3	1,3	0,0	198	99	5.19877e-06	0.00055045	0.6,0.0	1.0,1.0	-0.7
47715	ENSMUSG00000042496.18	Prdm10	chr9	+	31316169	31316334	31316241	31316334	31313552	31313621	47715	16,39	0,1	72,50	6,6	171	99	0.000868237	0.03429	1.0,0.958	0.874,0.828	0.128
47739	ENSMUSG00000039542.16	Ncam1	chr9	-	49541887	49542328	49541887	49542325	49543010	49543142	47739	1,1	0,0	5,4	5,1	102	99	4.94073e-05	0.00369889	1.0,1.0	0.493,0.795	0.356
47764	ENSMUSG00000019087.13	Atp6ap1	chrX	+	74300249	74300627	74300577	74300627	74297622	74297749	47764	7501210	28,57	894928	386350	198	99	0	0	0.931,0.914	0.537,0.57	0.369
47801	ENSMUSG00000021733.11	Slc4a7	chr14	+	14748499	14748623	14748526	14748623	14745967	14746083	47801	6,4	10,0	2,4	0,0	126	99	0.000849361	0.0337543	0.32,1.0	1.0,1.0	-0.34
47887	ENSMUSG00000032299.10	Commd4	chr9	-	57155901	57156083	57155901	57156014	57156171	57156555	47887	18,22	2,7	4,6	0,0	168	99	6.50761e-05	0.0046229	0.841,0.649	1.0,1.0	-0.255
47888	ENSMUSG00000032299.10	Commd4	chr9	-	57155901	57156093	57155901	57156014	57156171	57156555	47888	20,21	2,7	4,6	0,0	178	99	6.19302e-05	0.00446681	0.848,0.625	1.0,1.0	-0.264
48059	ENSMUSG00000027132.3	Katnbl1	chr2	+	112408260	112408433	112408382	112408433	112406073	112406353	48059	15,5	0,1	5,4	18,14	198	99	1.07631e-09	3.16978e-07	1.0,0.714	0.122,0.125	0.734
48272	ENSMUSG00000025041.17	Nt5c2	chr19	-	46898327	46898542	46898327	46898415	46898621	46898679	48272	1,8	0,2	1,0	2,3	198	99	2.55334e-05	0.00211447	1.0,0.667	0.2,0.0	0.734
48316	ENSMUSG00000016933.17	Plcg1	chr2	+	160759644	160759906	160759737	160759906	160759453	160759550	48316	10,8	2,2	10,10	0,0	192	99	0.00109173	0.040559	0.721,0.673	1.0,1.0	-0.303
48337	ENSMUSG00000004980.16	Hnrnpa2b1	chr6	-	51464088	51464505	51464088	51464211	51465178	51465241	48337	327618	8371252	170203	138144	198	99	2.22045e-16	1.79533e-13	0.163,0.198	0.381,0.413	-0.217
48467	ENSMUSG00000079523.8	Tmsb10	chr6	-	72957346	72957641	72957346	72957565	72957912	72958302	48467	3,1	5,5	3,5	0,1	175	99	1.5535e-05	0.00139003	0.253,0.102	1.0,0.739	-0.692
48489	ENSMUSG00000079523.8	Tmsb10	chr6	-	72957906	72958247	72957906	72958022	72958336	72958488	48489	0,0	13,14	11,13	23,26	198	99	6.75841e-07	0.000100182	0.0,0.0	0.193,0.2	-0.197
48500	ENSMUSG00000022744.12	Cldnd1	chr16	+	58729442	58729747	58729537	58729747	58728047	58728084	48500	3,3	6,22	13,5	5,5	194	99	0.000523913	0.0235814	0.203,0.065	0.57,0.338	-0.32
48531	ENSMUSG00000036529.17	Sbf1	chr15	-	89295564	89296029	89295564	89295576	89299482	89299620	48531	246357	80129	100,92	68,57	198	99	0.000231559	0.0126816	0.606,0.58	0.424,0.447	0.157
48557	ENSMUSG00000028580.15	Pum1	chr4	+	130743677	130743794	130743689	130743794	130741462	130741556	48557	10,45	107179	67,43	70,45	111	99	3.00693e-12	1.43783e-09	0.077,0.183	0.461,0.46	-0.331
48558	ENSMUSG00000028580.15	Pum1	chr4	+	130743677	130743794	130743692	130743794	130741462	130741556	48558	15,45	178284	68,45	125114	114	99	9.82358e-11	3.61037e-08	0.068,0.121	0.321,0.255	-0.194
48753	ENSMUSG00000032582.14	Rbm6	chr9	-	107853270	107853562	107853270	107853540	107860348	107860459	48753	0,0	5,8	1,4	5,8	121	99	0.000996503	0.0375865	0.0,0.0	0.141,0.29	-0.215
48755	ENSMUSG00000032582.14	Rbm6	chr9	-	107853359	107853674	107853359	107853562	107860348	107860459	48755	75,68	0,0	21,13	1,4	198	99	0.000763691	0.0309302	1.0,1.0	0.913,0.619	0.234
48882	ENSMUSG00000032478.14	Nme6	chr9	+	109835259	109835414	109835322	109835414	109833290	109833295	48882	7,8	3,8	10,4	0,0	162	99	3.47551e-07	5.6822e-05	0.588,0.379	1.0,1.0	-0.516
48901	ENSMUSG00000054792.15	Klhl18	chr9	-	110436010	110436251	110436010	110436233	110437346	110437483	48901	2,4	10,10	0,0	4,3	117	99	0.00050424	0.0228566	0.145,0.253	0.0,0.0	0.199
49174	ENSMUSG00000019977.16	Hbs1l	chr10	+	21309093	21309314	21309098	21309314	21307584	21307779	49174	1,1	32,44	3,4	10,10	104	99	0.000259332	0.0137619	0.029,0.021	0.222,0.276	-0.224
49201	ENSMUSG00000026171.12	Rnf25	chr1	-	74598692	74599159	74598692	74598792	74601324	74601397	49201	10,24	0,0	15,11	2,8	198	99	3.19991e-06	0.000366752	1.0,1.0	0.789,0.407	0.402
49482	ENSMUSG00000020085.15	Aifm2	chr10	+	61738286	61738508	61738400	61738508	61736582	61736758	49482	2,1	0,1	0,0	1,2	198	99	0.000555871	0.0246456	1.0,0.333	0.0,0.0	0.666
49484	ENSMUSG00000020083.13	Fam241b	chr10	-	62109883	62110012	62109883	62110006	62110235	62110496	49484	1,0	0,4	6,6	0,0	105	99	0.000726459	0.0298573	1.0,0.0	1.0,1.0	-0.5
49536	ENSMUSG00000032480.17	Dhx30	chr9	-	110115035	110115211	110115035	110115151	110115490	110115582	49536	8,14	0,1	13,9	3,3	159	99	0.00141661	0.0490627	1.0,0.897	0.73,0.651	0.258
49537	ENSMUSG00000032480.17	Dhx30	chr9	-	110115035	110115411	110115035	110115151	110115490	110115582	49537	7,13	0,1	9,9	3,3	198	99	0.000641835	0.0271751	1.0,0.867	0.6,0.6	0.334
49559	ENSMUSG00000010461.15	Eya4	chr10	-	23349451	23349890	23349451	23349888	23350662	23350786	49559	26,25	6,2	3,8	0,0	101	99	0.00100359	0.0377172	0.809,0.925	1.0,1.0	-0.133

## Sheet: A5SS
ID	GeneID	geneSymbol	chr	strand	longExonStart_0base	longExonEnd	shortES	shortEE	flankingES	flankingEE	ID.1	IJC_SAMPLE_1	SJC_SAMPLE_1	IJC_SAMPLE_2	SJC_SAMPLE_2	IncFormLen	SkipFormLen	PValue	FDR	IncLevel1	IncLevel2	IncLevelDifference
14	ENSMUSG00000041353.12	Tmem29	chrX	-	150458961	150459154	150459071	150459154	150420341	150420441	14	204282	124155	166160	205213	198	99	3.07204e-08	3.85066e-06	0.451,0.476	0.288,0.273	0.183
31	ENSMUSG00000004221.16	Ikbkg	chrX	+	74427761	74427902	74427761	74427874	74432804	74433006	31	28,27	90122	8,1	75,37	127	99	0.000288245	0.00878558	0.195,0.147	0.077,0.021	0.122
42	ENSMUSG00000037475.15	Thoc2	chrX	-	41813416	41814008	41813949	41814008	41812458	41812494	42	16,37	161212	21,12	52,29	198	99	0.000261589	0.00816445	0.047,0.08	0.168,0.171	-0.106
108	ENSMUSG00000024889.5	Rce1	chr19	-	4624659	4624763	4624684	4624763	4624013	4624181	108	42,22	124173	34,28	61,65	124	99	0.00143556	0.0311797	0.213,0.092	0.308,0.256	-0.13
139	ENSMUSG00000117694.1	Gm28285	chr18	+	35557336	35557391	35557336	35557369	35577557	35577619	139	85,93	21,32	71,59	52,32	121	99	0.000883856	0.0214677	0.768,0.704	0.528,0.601	0.171
140	ENSMUSG00000117694.1	Gm28285	chr18	+	35557336	35557405	35557336	35557369	35577557	35577619	140	105125	21,32	98,59	52,32	135	99	0.00014928	0.00514257	0.786,0.741	0.58,0.575	0.186
149	ENSMUSG00000024293.16	Esco1	chr18	-	10593745	10595875	10595675	10595875	10584247	10584362	149	85107	0,0	40,41	8,6	198	99	4.03263e-09	6.32474e-07	1.0,1.0	0.714,0.774	0.256
158	ENSMUSG00000024097.11	Srsf7	chr17	-	80204121	80204232	80204154	80204232	80202690	80202744	158	8451296	165206	193184	21,5	132	99	1.70628e-05	0.000848004	0.793,0.825	0.873,0.965	-0.11
159	ENSMUSG00000024097.11	Srsf7	chr17	-	80204130	80204232	80204154	80204232	80202690	80202744	159	9831443	165206	269178	21,5	123	99	1.67446e-06	0.000122968	0.827,0.849	0.912,0.966	-0.101
162	ENSMUSG00000024073.16	Birc6	chr17	+	74615219	74615357	74615219	74615330	74618435	74618563	162	220325	74126	59,39	41,31	126	99	0.00061847	0.0161803	0.7,0.67	0.531,0.497	0.171
164	ENSMUSG00000024073.16	Birc6	chr17	+	74618435	74619838	74618435	74618563	74622035	74622251	164	292424	1,0	93,79	29,9	198	99	0	0	0.993,1.0	0.616,0.814	0.281
166	ENSMUSG00000024059.10	Clip4	chr17	+	71828506	71828705	71828506	71828650	71831204	71831339	166	6,7	2,5	0,2	10,4	154	99	0.000123445	0.0043882	0.659,0.474	0.0,0.243	0.445
234	ENSMUSG00000002274.13	Metrn	chr17	-	25796085	25796641	25796240	25796641	25795373	25795433	234	68,80	159259	55,57	67,68	198	99	9.52417e-06	0.000525193	0.176,0.134	0.291,0.295	-0.138
240	ENSMUSG00000041130.10	Zfp598	chr17	+	24678595	24678713	24678595	24678704	24679036	24679224	240	82,89	52107	80,69	31,25	108	99	0.00114104	0.0261668	0.591,0.433	0.703,0.717	-0.198
290	ENSMUSG00000022641.15	Bbx	chr16	-	50432110	50432389	50432241	50432389	50428909	50428981	290	99129	76120	60,64	120116	198	99	5.52451e-06	0.000338754	0.394,0.35	0.2,0.216	0.164
295	ENSMUSG00000022704.15	Qtrt2	chr16	-	43880828	43881213	43880967	43881213	43880298	43880354	295	9,10	26,48	11,16	10,7	198	99	3.64876e-05	0.00158	0.148,0.094	0.355,0.533	-0.323
296	ENSMUSG00000022704.15	Qtrt2	chr16	-	43880828	43881213	43880992	43881213	43880298	43880354	296	14,16	102139	12,14	30,27	198	99	0.000124997	0.00443832	0.064,0.054	0.167,0.206	-0.128
299	ENSMUSG00000034206.15	Polq	chr16	+	37013106	37013448	37013106	37013286	37015078	37015209	299	4,2	33,37	6,3	4,9	198	99	0.0026139	0.0489103	0.057,0.026	0.429,0.143	-0.244
329	ENSMUSG00000022702.16	Hira	chr16	+	18896453	18896773	18896453	18896564	18897697	18897788	329	79109	198225	59,34	50,52	198	99	0.00254113	0.0480508	0.166,0.195	0.371,0.246	-0.128
423	ENSMUSG00000072501.5	Phf20l1	chr15	+	66630866	66631045	66630866	66630966	66632705	66632901	423	33,47	157246	44,32	17,17	178	99	0	0	0.105,0.096	0.59,0.511	-0.45
429	ENSMUSG00000097039.8	Pvt1	chr15	+	62107147	62107511	62107147	62107465	62175466	62175548	429	10,13	45,54	24,19	23,26	145	99	3.29036e-05	0.00145344	0.132,0.141	0.416,0.333	-0.238
436	ENSMUSG00000024943.9	Smc5	chr19	-	23214641	23214740	23214644	23214740	23214065	23214170	436	50116	96182	187176	161153	102	99	2.59266e-05	0.00119526	0.336,0.382	0.53,0.528	-0.17
443	ENSMUSG00000039458.15	Mtmr12	chr15	+	12236017	12236148	12236017	12236120	12237928	12238019	443	64134	12,22	21,38	1,1	127	99	0.000358384	0.0105623	0.806,0.826	0.942,0.967	-0.138
454	ENSMUSG00000024424.15	Ttc39c	chr18	+	12695235	12695590	12695235	12695562	12697890	12698059	454	184245	15,20	214173	56,74	127	99	7.34812e-10	1.39843e-07	0.905,0.905	0.749,0.646	0.208
476	ENSMUSG00000057858.8	Fam204a	chr19	-	60226231	60226697	60226643	60226697	60212672	60212762	476	82,91	12,6	92116	0,0	198	99	6.52684e-08	7.57283e-06	0.774,0.883	1.0,1.0	-0.171
478	ENSMUSG00000057858.8	Fam204a	chr19	-	60226231	60226697	60226643	60226697	60221053	60221304	478	123148	35,62	145197	16,19	198	99	1.70131e-07	1.7641e-05	0.637,0.544	0.819,0.838	-0.238
497	ENSMUSG00000004561.14	Mettl17	chr14	+	51889146	51889397	51889146	51889217	51889527	51889635	497	25,44	68129	25,12	14,13	198	99	0.000133997	0.00468853	0.155,0.146	0.472,0.316	-0.244
508	ENSMUSG00000023026.16	Dip2b	chr15	+	100155033	100155156	100155033	100155153	100157169	100157367	508	22,27	64118	4,4	103,59	102	99	5.57207e-07	4.83083e-05	0.25,0.182	0.036,0.062	0.167
523	ENSMUSG00000052395.17	Rft1	chr14	+	30676849	30676907	30676849	30676900	30677686	30677817	523	14,17	64,86	11,11	18,8	106	99	0.000732226	0.01846	0.17,0.156	0.363,0.562	-0.299
528	ENSMUSG00000039308.6	Ndst2	chr14	-	20724710	20724820	20724747	20724820	20724460	20724563	528	153187	14,17	50,67	0,1	136	99	1.82934e-05	0.000901983	0.888,0.889	1.0,0.98	-0.101
561	ENSMUSG00000021576.6	Pdcd6	chr13	-	74309683	74309842	74309689	74309842	74305540	74305650	561	10641521	403543	1025909	200197	105	99	1.26653e-06	9.73639e-05	0.713,0.725	0.829,0.813	-0.102
563	ENSMUSG00000097360.8	9430065F17Rik	chr13	+	67553034	67553353	67553034	67553253	67553573	67554634	563	13,5	3,4	5,4	0,0	198	99	3.17004e-06	0.000209619	0.684,0.385	1.0,1.0	-0.466
564	ENSMUSG00000097333.7	Zfp87	chr13	-	67521147	67521319	67521192	67521319	67520625	67520721	564	33,34	56,99	184144	24,9	144	99	0	0	0.288,0.191	0.841,0.917	-0.639
588	ENSMUSG00000037816.10	Fbxw17	chr13	+	50419839	50420028	50419839	50419991	50423201	50423362	588	8,14	3,3	2,1	0,0	136	99	0.00011616	0.00417681	0.66,0.773	1.0,1.0	-0.283
617	ENSMUSG00000021156.17	Zmynd11	chr13	-	9690277	9690514	9690445	9690514	9689451	9689724	617	152225	209346	265259	130100	198	99	0	0	0.267,0.245	0.505,0.564	-0.278
646	ENSMUSG00000021179.8	Nrde2	chr12	-	100151210	100151334	100151225	100151334	100149816	100150050	646	86127	20,55	96,83	13,8	114	99	0.000238992	0.00761141	0.789,0.667	0.865,0.9	-0.155
663	ENSMUSG00000021238.11	Aldh6a1	chr12	-	84442070	84443788	84443728	84443788	84441762	84441924	663	44,79	1,0	56,40	0,7	198	99	0.00261112	0.0489103	0.957,1.0	1.0,0.741	0.108
680	ENSMUSG00000049882.10	Vcpkmt	chr12	-	69582519	69582630	69582530	69582630	69581117	69581237	680	8,17	0,0	17,18	6,0	110	99	0.00149174	0.0321984	1.0,1.0	0.718,1.0	0.141
685	ENSMUSG00000021027.17	Ralgapa1	chr12	-	55721405	55722941	55722773	55722941	55719583	55719708	685	112164	35,76	46,24	40,45	198	99	3.62217e-05	0.00157234	0.615,0.519	0.365,0.211	0.279
724	ENSMUSG00000025571.13	Tnrc6c	chr11	+	117749576	117753144	117749576	117749817	117755962	117756106	724	1,9	2,2	4,1	0,0	198	99	0.0003537	0.0104638	0.2,0.692	1.0,1.0	-0.554
731	ENSMUSG00000061878.15	Sphk1	chr11	+	116533969	116534318	116533969	116534173	116534848	116535001	731	9,24	28,72	16,21	11,28	198	99	0.00218346	0.0429143	0.138,0.143	0.421,0.273	-0.206
735	ENSMUSG00000020770.13	Unk	chr11	+	116053015	116053158	116053015	116053119	116053489	116053690	735	77112	17,24	43,30	26,33	138	99	9.1218e-06	0.000509706	0.765,0.77	0.543,0.395	0.299
790	ENSMUSG00000020513.15	Tubd1	chr11	+	86544990	86545336	86544990	86545230	86548782	86549002	790	3,10	42,59	7,6	8,6	198	99	0.000151164	0.0051903	0.034,0.078	0.304,0.333	-0.263
799	ENSMUSG00000002055.9	Spag5	chr11	+	78304045	78305502	78304045	78305040	78313114	78313189	799	4,5	1,5	13,15	0,0	198	99	1.36997e-06	0.000103531	0.667,0.333	1.0,1.0	-0.5
830	ENSMUSG00000047284.14	Neurl4	chr11	+	69903007	69903719	69903007	69903452	69903864	69904163	830	111201	10,8	134,93	33,22	198	99	5.07128e-07	4.44606e-05	0.847,0.926	0.67,0.679	0.212
840	ENSMUSG00000024856.10	Cdk2ap2	chr19	+	4097400	4097733	4097400	4097507	4097816	4097917	840	82110	230342	334271	424389	198	99	1.4267e-08	1.89484e-06	0.151,0.139	0.283,0.258	-0.125
865	ENSMUSG00000020514.8	Mrpl22	chr11	+	58171793	58172021	58171793	58171842	58173032	58173150	865	58,87	439709	114122	236216	198	99	0	0	0.062,0.058	0.195,0.22	-0.148
918	ENSMUSG00000025354.5	Dnajc14	chr10	+	128805675	128805726	128805675	128805714	128806167	128807620	918	11,30	10,34	3,3	12,16	111	99	0.000572883	0.0152043	0.495,0.44	0.182,0.143	0.305
926	ENSMUSG00000034813.18	Grip1	chr10	+	120075289	120075479	120075289	120075476	120086951	120087260	926	1,1	0,1	0,1	2,2	102	99	0.00267825	0.0498752	1.0,0.493	0.0,0.327	0.583
927	ENSMUSG00000022974.12	Paxbp1	chr16	-	91030415	91030556	91030432	91030556	91027229	91027329	927	72108	98108	30,65	13,10	116	99	2.33978e-06	0.000161922	0.385,0.46	0.663,0.847	-0.333
961	ENSMUSG00000035478.14	Mbd3	chr10	-	80399121	80399550	80399217	80399550	80395435	80395595	961	367470	587881	592543	378335	195	99	0	0	0.241,0.213	0.443,0.451	-0.22
973	ENSMUSG00000034248.7	Slc25a37	chr14	-	69248882	69249622	69249393	69249622	69247580	69247637	973	149221	16,19	319279	4,7	198	99	5.67189e-07	4.89021e-05	0.823,0.853	0.976,0.952	-0.126
1010	ENSMUSG00000005625.15	Psmd4	chr3	-	95033908	95034026	95033917	95034026	95033632	95033764	1010	475712	7661200	908791	881807	108	99	6.28775e-06	0.000378855	0.362,0.352	0.486,0.473	-0.122
1058	ENSMUSG00000029166.14	Mapre3	chr5	+	30862497	30863405	30862497	30862643	30864573	30864728	1058	60,59	0,0	55,45	10,0	198	99	0.000120642	0.00431755	1.0,1.0	0.733,1.0	0.133
1065	ENSMUSG00000043510.12	Hscb	chr5	-	110835974	110836069	110835979	110836069	110830935	110830983	1065	7,8	10,26	4,5	0,2	104	99	0.000291393	0.00885228	0.4,0.227	1.0,0.704	-0.538
1073	ENSMUSG00000024845.17	Tmem134	chr19	+	4127549	4127836	4127549	4127639	4131228	4131282	1073	212332	16,28	388316	5,3	198	99	3.09277e-09	5.13449e-07	0.869,0.856	0.975,0.981	-0.115
1081	ENSMUSG00000010936.11	Vac14	chr8	+	110710317	110710556	110710317	110710492	110711592	110711711	1081	13,36	95150	36,18	71,48	163	99	0.000972295	0.0232609	0.077,0.127	0.235,0.186	-0.108
1084	ENSMUSG00000109378.1	Gm49396	chr7	+	30564202	30564394	30564202	30564301	30564473	30564607	1084	36,54	218270	69,53	78104	192	99	1.05e-09	1.91647e-07	0.078,0.093	0.313,0.208	-0.175
1085	ENSMUSG00000109378.1	Gm49396	chr7	+	30564202	30564394	30564202	30564301	30565094	30566381	1085	35,53	6,14	63,49	4,3	192	99	0.00231822	0.0449769	0.75,0.661	0.89,0.894	-0.186
1102	ENSMUSG00000040687.16	Madd	chr2	-	91158404	91158488	91158416	91158488	91157984	91158143	1102	15,30	2,12	1,1	5,2	111	99	0.000284819	0.00872374	0.87,0.69	0.151,0.308	0.55
1114	ENSMUSG00000046711.16	Hmga1	chr17	+	27556667	27557066	27556667	27556709	27559532	27559670	1114	235287	45,72	423445	172162	198	99	0.000401422	0.011538	0.723,0.666	0.551,0.579	0.13
1138	ENSMUSG00000007880.16	Arid1a	chr4	-	133695571	133696156	133695915	133696156	133694662	133694830	1138	65110	2,0	38,38	5,3	198	99	0.000490378	0.013461	0.942,1.0	0.792,0.864	0.143
1144	ENSMUSG00000031885.14	Cbfb	chr8	+	105202451	105202578	105202451	105202547	105215903	105217981	1144	11921961	502581	795681	130130	130	99	2.0476e-07	2.04832e-05	0.644,0.72	0.823,0.8	-0.13
1148	ENSMUSG00000054770.16	Kctd18	chr1	-	57965328	57965540	57965350	57965540	57963067	57963261	1148	36,53	5,11	4,10	0,0	121	99	0.00019272	0.00636219	0.855,0.798	1.0,1.0	-0.173
1154	ENSMUSG00000024050.17	Wiz	chr17	-	32381055	32381156	32381083	32381156	32378839	32379118	1154	12,4	9,15	1,0	4,4	127	99	0.00107045	0.0248588	0.51,0.172	0.163,0.0	0.259
1190	ENSMUSG00000015305.6	Sash1	chr10	-	8750652	8751485	8751138	8751485	8746115	8746190	1190	1,0	6,20	20,4	8,13	198	99	1.28821e-05	0.000674605	0.077,0.0	0.556,0.133	-0.306
1192	ENSMUSG00000029916.11	Agk	chr6	+	40352352	40354807	40352352	40352432	40355013	40355093	1192	0,0	2,3	4,4	0,0	198	99	5.6966e-11	1.42295e-08	0.0,0.0	1.0,1.0	-1
1204	ENSMUSG00000068882.13	Ssb	chr2	+	69861561	69861739	69861561	69861712	69866189	69866293	1204	31,28	2,0	33,31	165141	126	99	0	0	0.924,1.0	0.136,0.147	0.821
1222	ENSMUSG00000028487.18	Bnc2	chr4	-	84674933	84674997	84674974	84674997	84610108	84610197	1222	3,6	12,12	12,11	7,3	140	99	0.000520809	0.0140858	0.15,0.261	0.548,0.722	-0.429
1230	ENSMUSG00000039137.18	Whrn	chr4	-	63435347	63435562	63435359	63435562	63434109	63434146	1230	12,15	157250	12,16	45,39	111	99	8.10019e-07	6.63556e-05	0.064,0.051	0.192,0.268	-0.173
1236	ENSMUSG00000048832.9	Vps37c	chr19	+	10688750	10688983	10688750	10688979	10706209	10706308	1236	15,44	56,84	41,62	23,35	103	99	4.9804e-08	5.91039e-06	0.205,0.335	0.631,0.63	-0.361
1273	ENSMUSG00000051517.14	Arhgef39	chr4	-	43497880	43498029	43497958	43498029	43497581	43497710	1273	6,4	27,46	30,23	48,20	177	99	1.64215e-06	0.000121453	0.111,0.046	0.259,0.391	-0.246
1277	ENSMUSG00000024989.15	Cep55	chr19	+	38057409	38057566	38057409	38057542	38057788	38057983	1277	40,48	72,92	58,52	33,34	123	99	4.8064e-07	4.27386e-05	0.309,0.296	0.586,0.552	-0.266
1298	ENSMUSG00000028289.12	Epha7	chr4	+	28938595	28938779	28938595	28938764	28942585	28942694	1298	88109	21,42	32,35	30,27	114	99	0.000141684	0.00493538	0.784,0.693	0.481,0.53	0.233
1329	ENSMUSG00000036550.16	Cnot1	chr8	-	95733070	95733323	95733091	95733323	95730412	95730661	1329	249383	291532	79,56	288254	120	99	3.88578e-15	1.68443e-12	0.414,0.373	0.185,0.154	0.224
1385	ENSMUSG00000026641.13	Usf1	chr1	+	171415714	171415830	171415714	171415799	171416134	171416236	1385	498774	117166	770659	69,56	130	99	3.16202e-10	6.71359e-08	0.764,0.78	0.895,0.9	-0.125
1397	ENSMUSG00000027854.12	Sike1	chr3	+	102997242	102997409	102997242	102997385	102998489	102998603	1397	12,14	228311	37,25	83,50	123	99	0	0	0.041,0.035	0.264,0.287	-0.237
1411	ENSMUSG00000028218.19	Fam92a	chr4	-	12168222	12168324	12168228	12168324	12164087	12164192	1411	12,8	62,89	9,13	29,21	105	99	0.00245215	0.0468384	0.154,0.078	0.226,0.369	-0.181
1474	ENSMUSG00000026812.16	Tsc1	chr2	+	28671765	28672087	28671765	28671881	28672392	28672504	1474	8,8	91189	18,35	66,64	198	99	1.40595e-10	3.25046e-08	0.042,0.021	0.12,0.215	-0.136
1475	ENSMUSG00000026812.16	Tsc1	chr2	+	28671765	28672087	28671765	28671923	28672392	28672504	1475	8,11	1,4	17,38	0,0	198	99	0.000111586	0.00406383	0.8,0.579	1.0,1.0	-0.31
1480	ENSMUSG00000043940.15	Wdfy3	chr5	-	101900013	101900249	101900058	101900249	101898426	101898561	1480	45,95	39,47	13,7	20,15	144	99	0.00266222	0.0496656	0.442,0.582	0.309,0.243	0.236
1483	ENSMUSG00000029454.15	Mapkapk5	chr5	-	121526738	121526860	121526744	121526860	121525662	121525767	1483	227349	77126	110,99	23,16	105	99	0.00178549	0.0369053	0.735,0.723	0.818,0.854	-0.107
1502	ENSMUSG00000029148.15	Nrbp1	chr5	+	31244165	31244559	31244165	31244288	31244876	31244966	1502	475755	0,1	194188	20,8	198	99	3.0087e-14	1.18867e-11	1.0,0.997	0.829,0.922	0.123
1513	ENSMUSG00000042520.16	Ubap2l	chr3	-	90031295	90031370	90031310	90031370	90028324	90028377	1513	149219	245376	88,73	84,74	114	99	0.00105126	0.0245816	0.346,0.336	0.476,0.461	-0.128
1514	ENSMUSG00000042520.16	Ubap2l	chr3	-	90038814	90039016	90038847	90039016	90038369	90038465	1514	164321	311627	115,93	442311	132	99	6.23958e-06	0.00037668	0.283,0.277	0.163,0.183	0.107
1524	ENSMUSG00000037364.12	Srrt	chr5	-	137301317	137302314	137302125	137302314	137300243	137300413	1524	121206	366587	72,77	99,83	198	99	1.07667e-07	1.17843e-05	0.142,0.149	0.267,0.317	-0.147
1542	ENSMUSG00000024937.15	Ehbp1l1	chr19	-	5717661	5720407	5719947	5720407	5717038	5717196	1542	126225	34,36	46,46	25,33	198	99	1.036e-05	0.000559732	0.649,0.758	0.479,0.411	0.259
1543	ENSMUSG00000024937.15	Ehbp1l1	chr19	-	5717661	5720407	5720184	5720407	5717038	5717196	1543	184230	27,40	108,95	3,2	198	99	1.31243e-07	1.39803e-05	0.773,0.742	0.947,0.96	-0.196
1544	ENSMUSG00000024937.15	Ehbp1l1	chr19	-	5719947	5720407	5720184	5720407	5717038	5717196	1544	206236	27,40	124123	3,2	198	99	1.19369e-08	1.61984e-06	0.792,0.747	0.954,0.969	-0.192
1590	ENSMUSG00000038733.14	Wdr26	chr1	-	181209002	181209107	181209050	181209107	181203023	181203160	1590	317523	211339	187162	228232	147	99	1.87656e-07	1.90161e-05	0.503,0.51	0.356,0.32	0.168
1591	ENSMUSG00000038733.14	Wdr26	chr1	-	181209002	181209107	181209050	181209107	181203023	181203224	1591	151231	3,4	106,90	22,22	147	99	3.02536e-13	1.09796e-10	0.971,0.975	0.764,0.734	0.224
1604	ENSMUSG00000026927.17	Entr1	chr2	-	26385497	26385609	26385540	26385609	26384681	26384821	1604	113193	4,3	57,33	4,7	142	99	0.00156445	0.0333524	0.952,0.978	0.909,0.767	0.127
1608	ENSMUSG00000000823.16	Zfp512b	chr2	-	181588624	181588801	181588654	181588801	181588395	181588520	1608	14,14	23,39	0,0	6,6	129	99	1.46753e-05	0.000741148	0.318,0.216	0.0,0.0	0.267
1612	ENSMUSG00000046808.17	Atp10d	chr5	+	72265970	72266168	72265970	72266074	72267406	72267533	1612	0,0	8,17	6,2	6,6	193	99	2.35622e-05	0.00111005	0.0,0.0	0.339,0.146	-0.242
1624	ENSMUSG00000031156.18	Slc35a2	chrX	+	7892139	7893415	7892139	7892867	7894190	7894464	1624	52,65	31,81	27,30	6,2	198	99	2.19092e-05	0.00104239	0.456,0.286	0.692,0.882	-0.416
1625	ENSMUSG00000066892.14	Fbxl12	chr9	-	20642203	20644298	20644194	20644298	20642023	20642096	1625	64,89	26,22	70,60	10,3	198	99	0.000978184	0.0233548	0.552,0.669	0.778,0.909	-0.233
1646	ENSMUSG00000024911.7	Fibp	chr19	+	5463170	5463325	5463170	5463304	5463603	5463712	1646	96161	147147	48,35	120,95	120	99	0.000232063	0.00742864	0.35,0.475	0.248,0.233	0.172
1649	ENSMUSG00000027405.16	Nop56	chr2	+	130277031	130277314	130277031	130277132	130277475	130277624	1649	10171493	16062604	142119	730643	198	99	0	0	0.24,0.223	0.089,0.085	0.144
1673	ENSMUSG00000043019.12	Edem3	chr1	+	151805849	151806003	151805849	151805946	151807365	151807557	1673	203329	28,28	118,97	3,1	156	99	4.2772e-06	0.000270234	0.821,0.882	0.961,0.984	-0.121
1698	ENSMUSG00000038374.10	Rbm8a	chr3	+	96629939	96630065	96629939	96630028	96630305	96630361	1698	0,2	1,3	7,4	2,0	136	99	0.000688732	0.0175621	0.0,0.327	0.718,1.0	-0.696
1719	ENSMUSG00000048285.9	Frmd6	chr12	+	70877159	70877263	70877159	70877239	70878416	70878493	1719	114161	197188	16,13	87,88	123	99	1.74665e-10	3.86629e-08	0.318,0.408	0.129,0.106	0.245
1720	ENSMUSG00000002221.11	Paxip1	chr5	-	27783680	27783773	27783729	27783773	27781421	27781485	1720	45,33	84162	2,4	29,38	148	99	0.000500585	0.0136744	0.264,0.12	0.044,0.066	0.137
1783	ENSMUSG00000026107.11	Nabp1	chr1	-	51477721	51478399	51477824	51478399	51477477	51477616	1783	60,66	86117	44,35	14,16	198	99	3.71361e-08	4.59275e-06	0.259,0.22	0.611,0.522	-0.327
1784	ENSMUSG00000026107.11	Nabp1	chr1	-	51477721	51478399	51478300	51478399	51477477	51477616	1784	219289	17,22	145160	2,2	198	99	6.70441e-06	0.000400355	0.866,0.868	0.973,0.976	-0.107
1785	ENSMUSG00000026107.11	Nabp1	chr1	-	51477721	51478399	51478371	51478399	51477477	51477616	1785	113115	10,15	61,79	2,2	198	99	0.00130939	0.0291153	0.85,0.793	0.938,0.952	-0.123
1797	ENSMUSG00000018501.17	Ncor1	chr11	-	62378496	62378654	62378514	62378654	62376634	62376761	1797	86176	79120	24,45	77,63	117	99	0.000210279	0.0068081	0.479,0.554	0.209,0.377	0.223
1811	ENSMUSG00000032712.16	Resf1	chr6	+	149310321	149310377	149310321	149310359	149325404	149329784	1811	71151	12,47	28,22	30,26	117	99	8.50306e-08	9.65051e-06	0.834,0.731	0.441,0.417	0.353
1826	ENSMUSG00000036053.17	Fmnl2	chr2	+	53130411	53130505	53130411	53130458	53131839	53133804	1826	110147	24,40	21,31	0,1	146	99	7.4674e-07	6.14947e-05	0.757,0.714	1.0,0.955	-0.242
1842	ENSMUSG00000085385.7	Snhg17	chr2	-	158360458	158360599	158360526	158360599	158359181	158359432	1842	95134	17,11	73,48	1,1	167	99	2.59843e-05	0.00119616	0.768,0.878	0.977,0.966	-0.149
1886	ENSMUSG00000032727.14	Mier3	chr13	+	111686350	111686454	111686350	111686354	111687827	111687852	1886	0,2	52,63	3,4	12,13	198	99	0.000581443	0.0153792	0.0,0.016	0.111,0.133	-0.114
1901	ENSMUSG00000044783.16	Hjurp	chr1	-	88275027	88275097	88275041	88275097	88267947	88268026	1901	34,62	43,88	39,37	17,18	113	99	2.24847e-05	0.00106815	0.409,0.382	0.668,0.643	-0.26
1918	ENSMUSG00000026113.17	Inpp4a	chr1	+	37379921	37380177	37379921	37380060	37387697	37387870	1918	11,18	3,6	7,10	0,0	198	99	1.14292e-05	0.000607695	0.647,0.6	1.0,1.0	-0.377
1934	ENSMUSG00000039117.16	Taf4	chr2	-	179931979	179932225	179932015	179932225	179926215	179926330	1934	11,20	0,1	17,10	7,4	135	99	2.01019e-05	0.00096821	1.0,0.936	0.64,0.647	0.325
1943	ENSMUSG00000026309.14	Ilkap	chr1	-	91388344	91388446	91388354	91388446	91387214	91387341	1943	412581	28,47	281206	54,44	109	99	2.42864e-07	2.37619e-05	0.93,0.918	0.825,0.81	0.107
1944	ENSMUSG00000057335.11	Cep170	chr1	-	176742470	176742648	176742500	176742648	176739918	176740089	1944	75119	241304	72,65	61,59	129	99	7.64113e-11	1.83452e-08	0.193,0.231	0.475,0.458	-0.255
1945	ENSMUSG00000057335.11	Cep170	chr1	-	176742470	176742648	176742551	176742648	176739918	176740089	1945	250459	24,72	165133	99,92	180	99	0	0	0.851,0.778	0.478,0.443	0.354
1946	ENSMUSG00000057335.11	Cep170	chr1	-	176742500	176742648	176742551	176742648	176739918	176740089	1946	416644	24,72	154127	99,92	150	99	0	0	0.92,0.855	0.507,0.477	0.395
1947	ENSMUSG00000057335.11	Cep170	chr1	-	176769232	176769870	176769712	176769870	176758396	176758517	1947	100129	55,65	106,64	24,18	198	99	0.000710837	0.0180227	0.476,0.498	0.688,0.64	-0.177
1948	ENSMUSG00000057335.11	Cep170	chr1	-	176769232	176769870	176769712	176769870	176761350	176761500	1948	201346	34,61	176109	9,12	198	99	0.000910992	0.022024	0.747,0.739	0.907,0.82	-0.12
1989	ENSMUSG00000034799.16	Unc13a	chr8	-	71658002	71658111	71658023	71658111	71656254	71656301	1989	19,35	0,0	2,2	1,3	120	99	0.000189111	0.00628577	1.0,1.0	0.623,0.355	0.511
2016	ENSMUSG00000019710.13	Mrpl24	chr3	+	87919505	87919828	87919505	87919705	87921816	87922048	2016	7771150	186259	642571	290225	198	99	1.40099e-06	0.000105364	0.676,0.689	0.525,0.559	0.14
2018	ENSMUSG00000035597.19	Prpf39	chr12	+	65043231	65043877	65043231	65043357	65044005	65044124	2018	89108	83,84	71,75	36,25	198	99	0.00162325	0.0343247	0.349,0.391	0.497,0.6	-0.178
2028	ENSMUSG00000026811.18	St6galnac6	chr2	+	32608041	32608225	32608041	32608096	32609225	32609316	2028	24,44	47,63	36,51	18,6	198	99	2.9248e-05	0.00131475	0.203,0.259	0.5,0.81	-0.424
2031	ENSMUSG00000024163.17	Mapk8ip3	chr17	-	24906146	24906228	24906173	24906228	24905167	24905298	2031	144220	19,34	291239	161104	126	99	1.9887e-11	5.30506e-09	0.856,0.836	0.587,0.644	0.231
2045	ENSMUSG00000039318.12	Rab3gap2	chr1	+	185266900	185267074	185266900	185267014	185267172	185267279	2045	404613	89112	712595	29,23	159	99	0	0	0.739,0.773	0.939,0.942	-0.184
2050	ENSMUSG00000039178.9	Tbc1d19	chr5	+	53830454	53830555	53830454	53830498	53832969	53833045	2050	7,4	1,5	5,1	0,0	156	99	3.58587e-05	0.00157189	0.816,0.337	1.0,1.0	-0.423
2066	ENSMUSG00000071064.14	Zfp827	chr8	+	79186175	79186358	79186175	79186353	79188148	79188181	2066	6,4	12,24	1,3	0,1	104	99	0.000169121	0.00571261	0.322,0.137	1.0,0.741	-0.641
2081	ENSMUSG00000029062.14	Cdk11b	chr4	+	155625530	155625773	155625530	155625654	155626773	155626889	2081	61116	143177	41,34	168167	198	99	1.89119e-06	0.000136004	0.176,0.247	0.109,0.092	0.111
2119	ENSMUSG00000058594.15	Fbh1	chr2	-	11769749	11769931	11769775	11769931	11767121	11767711	2119	102146	245354	29,28	170122	125	99	4.24714e-05	0.00180105	0.248,0.246	0.119,0.154	0.11
2136	ENSMUSG00000034485.10	Uaca	chr9	+	60854315	60854503	60854315	60854497	60856197	60856235	2136	86120	62,96	61,62	23,24	105	99	0.00139513	0.0304712	0.567,0.541	0.714,0.709	-0.157
2145	ENSMUSG00000029833.17	Trim24	chr6	+	37945520	37945789	37945520	37945687	37949221	37949398	2145	152293	201317	160152	93,87	198	99	2.2011e-06	0.000154107	0.274,0.316	0.462,0.466	-0.169
2161	ENSMUSG00000028677.19	Rnf220	chr4	-	117285850	117285972	117285928	117285972	117285378	117285511	2161	208308	47,73	175100	10,10	177	99	2.07782e-06	0.000147388	0.712,0.702	0.907,0.848	-0.17
2162	ENSMUSG00000028677.19	Rnf220	chr4	-	117288362	117289068	117289025	117289068	117285850	117285972	2162	7,7	109120	26,26	62,39	198	99	4.05753e-12	1.21769e-09	0.031,0.028	0.173,0.25	-0.182
2166	ENSMUSG00000063047.9	Zfp780b	chr7	-	27976739	27976833	27976751	27976833	27974752	27974805	2166	16,53	19,26	4,4	20,12	111	99	0.000156486	0.00534365	0.429,0.645	0.151,0.229	0.347
2178	ENSMUSG00000040174.14	Alkbh3	chr2	-	94010262	94010752	94010682	94010752	94008423	94008592	2178	81152	124173	45,28	157139	198	99	2.12979e-10	4.61616e-08	0.246,0.305	0.125,0.092	0.167
2180	ENSMUSG00000042198.12	Chchd7	chr4	+	3938913	3939131	3938913	3938962	3939423	3939526	2180	204222	22,40	139138	7,9	198	99	0.00122171	0.0275113	0.823,0.735	0.908,0.885	-0.118
2211	ENSMUSG00000053332.13	Gas5	chr1	+	161036819	161037315	161036819	161036852	161038224	161038272	2211	318508	19,38	320227	54,49	198	99	2.47087e-07	2.40995e-05	0.893,0.87	0.748,0.698	0.158
2212	ENSMUSG00000053332.13	Gas5	chr1	+	161037287	161037547	161037287	161037315	161038224	161038272	2212	91192	0,1	114115	13,2	198	99	1.41362e-05	0.000723141	1.0,0.99	0.814,0.966	0.105
2219	ENSMUSG00000055923.16	Aasdh	chr5	-	76886046	76886322	76886129	76886322	76884085	76884201	2219	18,26	51,46	27,18	8,3	182	99	3.95074e-09	6.2276e-07	0.161,0.235	0.647,0.765	-0.508
2243	ENSMUSG00000028797.20	Tmem234	chr4	+	129600982	129601243	129600982	129601134	129602194	129602261	2243	439764	208318	768645	144131	198	99	3.38301e-10	7.03915e-08	0.513,0.546	0.727,0.711	-0.189
2254	ENSMUSG00000001632.16	Brpf1	chr6	+	113317547	113317694	113317547	113317676	113318411	113318721	2254	36,84	53,66	5,21	56,52	117	99	5.13814e-05	0.0021297	0.365,0.519	0.07,0.255	0.279
2261	ENSMUSG00000039449.14	Prpf18	chr2	-	4637147	4638995	4638848	4638995	4635827	4635968	2261	185274	0,1	94,95	9,10	198	99	5.1877e-10	1.02477e-07	1.0,0.993	0.839,0.826	0.164
2269	ENSMUSG00000027829.15	Ccnl1	chr3	-	65955129	65955276	65955203	65955276	65951433	65951554	2269	147196	58101	129109	16,15	173	99	9.92835e-09	1.40214e-06	0.592,0.526	0.822,0.806	-0.255
2286	ENSMUSG00000026634.16	Angel2	chr1	+	190940873	190941458	190940873	190941295	190942120	190942247	2286	18,25	143215	7,13	21,25	198	99	0.000522708	0.0141127	0.059,0.055	0.143,0.206	-0.117
2288	ENSMUSG00000052446.17	Zfp961	chr8	+	71965793	71965920	71965793	71965916	71966099	71966160	2288	22,30	5,7	8,7	0,0	103	99	0.000129631	0.00458199	0.809,0.805	1.0,1.0	-0.193
2289	ENSMUSG00000052446.17	Zfp961	chr8	+	71965793	71965990	71965793	71965916	71966099	71966160	2289	3,2	5,7	3,5	0,0	173	99	3.65839e-09	5.85548e-07	0.256,0.141	1.0,1.0	-0.801
2290	ENSMUSG00000052446.17	Zfp961	chr8	+	71965793	71965990	71965793	71965920	71966099	71966160	2290	2,0	21,28	3,5	8,7	169	99	0.000205113	0.00666851	0.053,0.0	0.18,0.295	-0.211
2295	ENSMUSG00000032280.16	Tle3	chr9	+	61394607	61394712	61394607	61394682	61401852	61402057	2295	90141	116175	18,23	83,86	129	99	1.00141e-08	1.40788e-06	0.373,0.382	0.143,0.17	0.221
2296	ENSMUSG00000032280.16	Tle3	chr9	+	61394607	61394712	61394607	61394682	61401855	61402057	2296	39,48	31,25	14,9	30,24	129	99	3.65908e-05	0.00158177	0.491,0.596	0.264,0.223	0.3
2300	ENSMUSG00000032280.16	Tle3	chr9	+	61409935	61410135	61409935	61410120	61411262	61411339	2300	115172	18,46	59,58	28,26	114	99	0.00249429	0.0474036	0.847,0.765	0.647,0.66	0.153
2311	ENSMUSG00000034032.15	Rpap1	chr2	-	119787186	119787297	119787220	119787297	119783733	119783970	2311	6,2	18,41	12,10	7,9	133	99	3.9928e-06	0.000254685	0.199,0.035	0.561,0.453	-0.39
2336	ENSMUSG00000021288.18	Klc1	chr12	+	111789324	111789486	111789324	111789459	111795547	111795678	2336	264374	53110	80,58	128,89	126	99	0	0	0.796,0.728	0.329,0.339	0.428
2337	ENSMUSG00000021288.18	Klc1	chr12	+	111789324	111789486	111789324	111789459	111806007	111806074	2337	210312	15,43	61,35	40,18	126	99	2.10165e-12	6.49452e-10	0.917,0.851	0.545,0.604	0.309
2342	ENSMUSG00000029439.14	Sfswap	chr5	+	129543213	129543379	129543213	129543295	129549453	129549684	2342	219380	26,47	108,95	4,3	183	99	0.000113314	0.00411238	0.82,0.814	0.936,0.945	-0.124
2352	ENSMUSG00000022770.17	Dlg1	chr16	+	31796865	31797010	31796865	31796965	31805613	31805734	2352	591904	115171	245245	146131	144	99	1.64313e-14	6.83783e-12	0.779,0.784	0.536,0.563	0.232
2368	ENSMUSG00000005774.12	Rfx5	chr3	+	94955014	94955146	94955014	94955136	94955351	94955385	2368	56115	12,18	24,20	1,1	109	99	0.00219799	0.0431185	0.809,0.853	0.956,0.948	-0.121
2374	ENSMUSG00000061136.14	Prpf40a	chr2	-	53191022	53191250	53191148	53191250	53189968	53190100	2374	8861067	273474	999843	228184	198	99	0.000276419	0.00852365	0.619,0.53	0.687,0.696	-0.117
2383	ENSMUSG00000035168.16	Tanc1	chr2	+	59790775	59790898	59790775	59790877	59791598	59791880	2383	125161	165226	26,23	90,92	120	99	2.67937e-07	2.59707e-05	0.385,0.37	0.192,0.171	0.196
2387	ENSMUSG00000060373.15	Hnrnpc	chr14	-	52081788	52081903	52081827	52081903	52081259	52081307	2387	12131702	13031848	852769	24162034	138	99	0	0	0.4,0.398	0.202,0.213	0.192
2403	ENSMUSG00000053453.9	Thoc7	chr14	-	13957459	13957631	13957553	13957631	13954538	13954656	2403	122202	32,42	174151	8,10	193	99	6.28463e-08	7.37404e-06	0.662,0.712	0.918,0.886	-0.215
2405	ENSMUSG00000044308.17	Ubr3	chr2	+	69991424	69991637	69991424	69991625	69993675	69993812	2405	97114	48109	47,48	117113	111	99	6.90828e-07	5.83341e-05	0.643,0.483	0.264,0.275	0.293
2417	ENSMUSG00000027014.14	Cwc22	chr2	-	77903795	77904034	77903813	77904034	77895765	77896578	2417	115159	50,80	43,45	86102	117	99	1.9984e-15	9.03944e-13	0.661,0.627	0.297,0.272	0.36
2421	ENSMUSG00000034101.14	Ctnnd1	chr2	-	84650320	84650745	84650405	84650745	84622010	84622082	2421	11,12	65,97	10,11	27,14	184	99	0.0012438	0.0278881	0.083,0.062	0.166,0.297	-0.159
2422	ENSMUSG00000034101.14	Ctnnd1	chr2	-	84650320	84650745	84650405	84650745	84626019	84626137	2422	11,12	3,5	10,11	1,0	184	99	0.000398289	0.0114917	0.664,0.564	0.843,1.0	-0.307
2427	ENSMUSG00000051736.8	Fam229b	chr10	-	39133822	39133900	39133878	39133900	39132246	39132378	2427	55,41	1,12	44,51	2,0	155	99	0.00220333	0.043196	0.972,0.686	0.934,1.0	-0.138
2438	ENSMUSG00000026792.16	Lrsam1	chr2	-	32960935	32961255	32961043	32961255	32959516	32959613	2438	15,30	65101	12,19	17,10	198	99	0.00045619	0.0127212	0.103,0.129	0.261,0.487	-0.258
2467	ENSMUSG00000032536.11	Trak1	chr9	+	121460358	121460715	121460358	121460577	121468984	121469087	2467	79,97	34,41	107,89	5,6	198	99	8.80218e-12	2.4529e-09	0.537,0.542	0.915,0.881	-0.358
2477	ENSMUSG00000052921.13	Arhgef15	chr11	-	68946983	68947396	68947235	68947396	68946560	68946643	2477	14,10	2,2	10,8	0,0	198	99	0.00237244	0.0457823	0.778,0.714	1.0,1.0	-0.254
2501	ENSMUSG00000039983.13	Ccdc32	chr2	-	119029307	119029393	119029316	119029393	119027137	119027387	2501	16,35	29,83	4,2	38,22	108	99	5.56758e-05	0.00227745	0.336,0.279	0.088,0.077	0.225
2502	ENSMUSG00000014763.8	Fam120b	chr17	+	15401744	15404397	15401744	15403129	15405754	15405935	2502	69112	81145	28,28	16,15	198	99	0.00222377	0.0435147	0.299,0.279	0.467,0.483	-0.186
2509	ENSMUSG00000001248.15	Gramd1a	chr7	-	31135525	31135739	31135596	31135739	31134413	31134517	2509	64106	76147	88,99	266260	170	99	4.15292e-06	0.000263449	0.329,0.296	0.162,0.181	0.141
2520	ENSMUSG00000025969.15	Nrp2	chr1	+	62786280	62786316	62786280	62786301	62815332	62818695	2520	38,78	145214	19,27	255207	114	99	1.33907e-08	1.79647e-06	0.185,0.24	0.061,0.102	0.131
2525	ENSMUSG00000041215.16	Yeats2	chr16	+	20171190	20174539	20171190	20171302	20179500	20179675	2525	115269	0,1	91,76	17,5	198	99	3.23067e-10	6.81301e-08	1.0,0.993	0.728,0.884	0.19
2542	ENSMUSG00000042772.15	Smg7	chr1	-	152848595	152849016	152848733	152849016	152846118	152846263	2542	202338	168265	338300	97,77	198	99	8.08242e-14	3.07635e-11	0.375,0.389	0.635,0.661	-0.266
2591	ENSMUSG00000039671.18	Zmynd8	chr2	-	165807518	165807929	165807674	165807929	165805186	165805377	2591	171266	164295	145,73	20,16	198	99	0	0	0.343,0.311	0.784,0.695	-0.413
2601	ENSMUSG00000029106.14	Add1	chr5	+	34616562	34616907	34616562	34616814	34620044	34620134	2601	18,37	0,1	23,27	13,4	192	99	5.93683e-06	0.000359097	1.0,0.95	0.477,0.777	0.348
2607	ENSMUSG00000063810.7	Alms1	chr6	+	85608985	85610532	85608985	85609125	85610817	85610936	2607	41,40	56,85	48,54	30,20	198	99	3.73292e-06	0.000241218	0.268,0.19	0.444,0.574	-0.28
2609	ENSMUSG00000044976.17	Wdr72	chr9	+	74148201	74148383	74148201	74148347	74148720	74148817	2609	12,3	10,3	0,0	2,3	135	99	7.35964e-06	0.00043105	0.468,0.423	0.0,0.0	0.446
2610	ENSMUSG00000038552.14	Fndc4	chr5	-	31293394	31293486	31293413	31293486	31292885	31293164	2610	71,80	145259	15,12	98,90	118	99	3.25812e-05	0.00144325	0.291,0.206	0.114,0.101	0.141
2648	ENSMUSG00000024002.18	Brd4	chr17	-	32224083	32224222	32224086	32224222	32221872	32222165	2648	7,11	25,73	4,5	108106	102	99	0.000462745	0.0128494	0.214,0.128	0.035,0.044	0.131
2664	ENSMUSG00000036980.13	Taf6	chr5	-	138186961	138187226	138187169	138187226	138184331	138184547	2664	136208	220314	35,45	138152	198	99	5.99135e-07	5.13725e-05	0.236,0.249	0.113,0.129	0.121
2672	ENSMUSG00000049550.17	Clip1	chr5	-	123630224	123631169	123630452	123631169	123627293	123627410	2672	556732	123172	221186	82,89	198	99	5.05489e-05	0.00210358	0.693,0.68	0.574,0.511	0.144
2705	ENSMUSG00000048668.16	Rhno1	chr6	-	128362367	128362868	128362838	128362868	128359105	128359354	2705	113163	40,57	42,26	32,26	198	99	0.000147378	0.00510079	0.585,0.588	0.396,0.333	0.222
2717	ENSMUSG00000037017.15	Zscan21	chr5	+	138116936	138117007	138116936	138116988	138124977	138125690	2717	1,0	1,4	7,11	2,5	118	99	0.000198716	0.00650799	0.456,0.0	0.746,0.649	-0.47
2720	ENSMUSG00000030815.11	Phkg2	chr7	+	127577534	127577710	127577534	127577646	127577974	127578029	2720	114154	0,7	70,54	8,6	163	99	0.0015132	0.0324812	1.0,0.93	0.842,0.845	0.122
2723	ENSMUSG00000030815.11	Phkg2	chr7	+	127577534	127577710	127577534	127577646	127579666	127579732	2723	60,67	5,10	46,32	12,23	163	99	0.00151147	0.0324812	0.879,0.803	0.7,0.458	0.262
2724	ENSMUSG00000030815.11	Phkg2	chr7	+	127577534	127578029	127577534	127577646	127579666	127579732	2724	111147	5,10	75,55	12,23	198	99	8.55051e-05	0.00325849	0.917,0.88	0.758,0.545	0.247
2725	ENSMUSG00000030815.11	Phkg2	chr7	+	127577534	127577710	127577534	127577688	127579666	127579732	2725	24,19	9,6	17,7	26,11	121	99	0.000101395	0.00376741	0.686,0.722	0.349,0.342	0.358
2726	ENSMUSG00000030815.11	Phkg2	chr7	+	127577534	127578029	127577534	127577688	127579666	127579732	2726	86117	9,6	58,43	26,11	198	99	7.34157e-06	0.00043105	0.827,0.907	0.527,0.662	0.272
2738	ENSMUSG00000025199.16	Chuk	chr19	-	44077245	44077379	44077262	44077379	44075430	44075530	2738	190350	51,96	70,55	39,43	116	99	2.29678e-05	0.00108747	0.761,0.757	0.605,0.522	0.196
2772	ENSMUSG00000043923.8	Ccdc84	chr9	-	44413442	44413533	44413470	44413533	44413136	44413201	2772	25,46	35,76	43,19	17,13	127	99	0.000193767	0.00637938	0.358,0.321	0.663,0.533	-0.259
2783	ENSMUSG00000042489.15	Clspn	chr4	+	126573135	126573347	126573135	126573308	126574640	126574816	2783	25,68	3,5	6,10	0,0	138	99	0.00258104	0.048499	0.857,0.907	1.0,1.0	-0.118
2873	ENSMUSG00000068329.12	Htra2	chr6	-	83053000	83053070	83053037	83053070	83052472	83052542	2873	35,56	9,20	4,12	1,0	136	99	0.000643074	0.0166426	0.739,0.671	0.744,1.0	-0.167
2898	ENSMUSG00000030057.15	Cnbp	chr6	-	87845655	87845793	87845676	87845793	87845121	87845557	2898	43206666	15822435	26422274	504330	120	99	5.16254e-13	1.81043e-10	0.693,0.693	0.812,0.85	-0.138
2900	ENSMUSG00000030057.15	Cnbp	chr6	-	87845673	87845793	87845676	87845793	87845464	87845557	2900	352504	15822435	164159	504330	102	99	9.16575e-06	0.000510843	0.178,0.167	0.24,0.319	-0.107
2910	ENSMUSG00000059439.15	Bcas3	chr11	+	85354593	85354679	85354593	85354661	85354887	85354975	2910	14,17	6,9	4,3	11,7	117	99	0.000641673	0.0166201	0.664,0.615	0.235,0.266	0.389
2976	ENSMUSG00000058013.11	2022-09-11	chr5	+	93138437	93138596	93138437	93138537	93139448	93139563	2976	21,41	4,18	26,12	0,0	158	99	3.57393e-07	3.32973e-05	0.767,0.588	1.0,1.0	-0.323
2981	ENSMUSG00000037363.9	Letm2	chr8	-	25597119	25597513	25597274	25597513	25596361	25596445	2981	15,10	1,4	11,2	0,0	198	99	0.000351778	0.0104168	0.882,0.556	1.0,1.0	-0.281
2985	ENSMUSG00000022538.20	Lsg1	chr16	-	30577798	30577997	30577898	30577997	30574545	30574606	2985	10,18	1,6	9,5	0,0	198	99	3.17284e-05	0.00141065	0.833,0.6	1.0,1.0	-0.284
3113	ENSMUSG00000040225.15	Prrc2c	chr1	-	162679484	162679607	162679499	162679607	162678009	162678228	3113	56125	245395	8,10	163129	114	99	2.3277e-10	5.01033e-08	0.166,0.216	0.041,0.063	0.139
3114	ENSMUSG00000040225.15	Prrc2c	chr1	-	162721429	162721539	162721444	162721539	162720480	162720606	3114	256443	40,70	175114	76,71	114	99	1.66564e-10	3.7632e-08	0.848,0.846	0.667,0.582	0.222
3122	ENSMUSG00000037103.8	Dcaf15	chr8	-	84097622	84097852	84097736	84097852	84097071	84097508	3122	68148	174296	133117	140125	198	99	2.91954e-06	0.00019554	0.163,0.2	0.322,0.319	-0.139
3245	ENSMUSG00000070436.12	Serpinh1	chr7	-	99352881	99353114	99353052	99353114	99351823	99351867	3245	228335	131223	134136	25,19	198	99	1.49325e-12	4.90588e-10	0.465,0.429	0.728,0.782	-0.308
3256	ENSMUSG00000063550.8	Nup98	chr7	-	102180376	102180515	102180427	102180515	102176312	102176405	3256	112188	209354	56,66	321307	150	99	7.97361e-11	1.88534e-08	0.261,0.26	0.103,0.124	0.147
3262	ENSMUSG00000003402.14	Prkcsh	chr9	+	22011437	22011596	22011437	22011575	22011673	22011770	3262	361596	278387	394308	497375	120	99	3.99611e-06	0.000254685	0.517,0.56	0.395,0.404	0.139
3355	ENSMUSG00000039219.18	Arid4b	chr13	+	14169918	14170179	14169918	14170071	14181219	14181304	3355	214312	40,47	107,84	7,3	198	99	0.000100495	0.00374004	0.728,0.768	0.884,0.933	-0.161
3399	ENSMUSG00000032525.15	Nktr	chr9	+	121738387	121740075	121738387	121738415	121741121	121741151	3399	22,33	8,17	15,9	1,0	198	99	1.23522e-05	0.000651225	0.579,0.493	0.882,1.0	-0.405
3405	ENSMUSG00000031583.13	Wrn	chr8	-	33342976	33343692	33343546	33343692	33335996	33336146	3405	128178	0,0	62,58	5,6	198	99	7.42388e-07	6.14607e-05	1.0,1.0	0.861,0.829	0.155
3416	ENSMUSG00000050914.16	Ankrd37	chr8	-	45999616	45999867	45999650	45999867	45999250	45999403	3416	21213009	97173	18021644	377334	133	99	0	0	0.942,0.928	0.781,0.786	0.151
3434	ENSMUSG00000036120.10	Rfxank	chr8	-	70135535	70135631	70135565	70135631	70135290	70135391	3434	13,33	38,67	22,19	18,9	129	99	0.000203792	0.0066325	0.208,0.274	0.484,0.618	-0.31
3461	ENSMUSG00000021901.10	Bap1	chr14	+	31253455	31253640	31253455	31253575	31254166	31254309	3461	3,11	4,5	8,2	0,0	164	99	5.05188e-07	4.44606e-05	0.312,0.57	1.0,1.0	-0.559
3497	ENSMUSG00000014856.12	Tmem208	chr8	+	105328321	105328484	105328321	105328458	105328607	105328692	3497	120165	406644	128,98	163124	125	99	1.84774e-12	5.76699e-10	0.19,0.169	0.383,0.385	-0.205
3504	ENSMUSG00000031728.10	Zfp821	chr8	+	109717761	109717906	109717761	109717887	109721194	109721343	3504	106163	71108	30,20	50,34	118	99	2.79409e-05	0.00126203	0.556,0.559	0.335,0.33	0.225
3552	ENSMUSG00000059495.14	Arhgef12	chr9	-	43022810	43022872	43022814	43022872	43020604	43020783	3552	26,59	251363	35,21	76,68	103	99	7.70553e-06	0.000448689	0.091,0.135	0.307,0.229	-0.155
3560	ENSMUSG00000048537.16	Phldb1	chr9	-	44697718	44697842	44697751	44697842	44696036	44696183	3560	47,51	113183	63,43	36,34	132	99	1.02338e-11	2.80182e-09	0.238,0.173	0.568,0.487	-0.322
3615	ENSMUSG00000038013.14	Wipf2	chr11	+	98863637	98863902	98863637	98863679	98884973	98885104	3615	53,60	4,8	55,68	31,30	198	99	1.20019e-06	9.3414e-05	0.869,0.789	0.47,0.531	0.329
3632	ENSMUSG00000042210.17	Abhd14a	chr9	-	106443805	106443942	106443826	106443942	106440620	106440910	3632	15,17	20,28	6,6	30,25	120	99	0.00260359	0.0488111	0.382,0.334	0.142,0.165	0.204
3657	ENSMUSG00000038412.8	Higd1a	chr9	-	121856437	121856585	121856449	121856585	121852490	121852609	3657	16,23	19,23	18,16	5,2	111	99	9.58043e-05	0.00360259	0.429,0.471	0.763,0.877	-0.37
3715	ENSMUSG00000032480.17	Dhx30	chr9	-	110115035	110115582	110115490	110115582	110112970	110113090	3715	209269	6,13	224154	21,22	198	99	0.000182257	0.00609038	0.946,0.912	0.842,0.778	0.119
3772	ENSMUSG00000025261.17	Huwe1	chrX	+	151803346	151803755	151803346	151803569	151806271	151806407	3772	4,6	27,54	11,9	13,13	198	99	3.17089e-05	0.00141065	0.069,0.053	0.297,0.257	-0.216
3831	ENSMUSG00000043384.15	Gprasp1	chrX	+	135743441	135743731	135743441	135743522	135744498	135744575	3831	6,3	39,36	7,6	12,7	198	99	0.000826903	0.0204343	0.071,0.04	0.226,0.3	-0.208
3955	ENSMUSG00000031328.15	Flna	chrX	-	74230484	74230570	74230511	74230570	74230300	74230396	3955	4,16	1,4	0,4	3,5	126	99	0.00228684	0.0445534	0.759,0.759	0.0,0.386	0.566
3961	ENSMUSG00000031328.15	Flna	chrX	-	74230511	74230570	74230553	74230570	74230300	74230396	3961	1,4	4,2	3,5	1,0	141	99	0.000429596	0.0121231	0.149,0.584	0.678,1.0	-0.472
4035	ENSMUSG00000001134.9	Uxt	chrX	-	20961721	20961986	20961933	20961986	20959937	20960019	4035	9,12	5,4	4,7	0,0	198	99	1.84259e-06	0.000133123	0.474,0.6	1.0,1.0	-0.463
4049	ENSMUSG00000001924.15	Uba1	chrX	+	20658325	20658625	20658325	20658576	20668448	20668565	4049	1,3	2,7	2,2	1,0	148	99	0.000809048	0.0201045	0.251,0.223	0.572,1.0	-0.549
4119	ENSMUSG00000025086.13	Trub1	chr19	+	57485072	57485497	57485072	57485212	57487264	57487321	4119	11,16	62104	19,10	11,16	198	99	1.30875e-05	0.000679794	0.081,0.071	0.463,0.238	-0.275
4326	ENSMUSG00000024642.17	Tle4	chr19	-	14595461	14595748	14595589	14595748	14594383	14594428	4326	2,3	112129	22,6	21,25	198	99	6.13827e-11	1.49673e-08	0.009,0.011	0.344,0.107	-0.215
4332	ENSMUSG00000031196.13	F8	chrX	-	75382154	75382291	75382157	75382291	75379486	75379576	4332	2,3	3,5	0,0	4,2	102	99	0.000267026	0.00830922	0.393,0.368	0.0,0.0	0.381
4344	ENSMUSG00000024667.12	Tmem216	chr19	-	10550933	10551040	10550957	10551040	10550467	10550819	4344	12,23	2,5	9,3	0,0	123	99	0.000443678	0.0124529	0.828,0.787	1.0,1.0	-0.193
4407	ENSMUSG00000056629.16	Fkbp2	chr19	-	6978557	6979047	6978972	6979047	6978389	6978436	4407	443636	3,1	301278	19,17	198	99	1.76836e-12	5.63188e-10	0.987,0.997	0.888,0.891	0.103
4408	ENSMUSG00000056629.16	Fkbp2	chr19	-	6978589	6979047	6978972	6979047	6978389	6978436	4408	14,17	3,1	30,27	19,17	198	99	0.00137216	0.0300747	0.7,0.895	0.441,0.443	0.355
4518	ENSMUSG00000024844.15	Banf1	chr19	-	5366173	5366606	5366561	5366606	5365817	5365956	4518	27,33	0,0	12,10	2,2	198	99	0.00143679	0.0311847	1.0,1.0	0.75,0.714	0.268
4521	ENSMUSG00000024844.15	Banf1	chr19	-	5366278	5366606	5366561	5366606	5365817	5365956	4521	9,5	0,0	6,5	2,2	198	99	0.000283143	0.00868945	1.0,1.0	0.6,0.556	0.422
4543	ENSMUSG00000063904.4	Dpp3	chr19	-	4914817	4915071	4915018	4915071	4914579	4914700	4543	1,1	1,2	1,1	0,0	198	99	3.61579e-05	0.00157229	0.333,0.2	1.0,1.0	-0.734
4544	ENSMUSG00000063904.4	Dpp3	chr19	-	4914847	4915071	4915018	4915071	4914579	4914700	4544	2,2	1,2	2,1	0,0	198	99	0.00217284	0.0427863	0.5,0.333	1.0,1.0	-0.584
4703	ENSMUSG00000024511.15	Rab27b	chr18	-	69994476	69994562	69994514	69994562	69989543	69989647	4703	68116	2,11	46,22	11,6	137	99	0.00206308	0.0410324	0.961,0.884	0.751,0.726	0.184
4728	ENSMUSG00000042439.13	Zfp532	chr18	+	65582187	65582398	65582187	65582362	65582726	65582809	4728	9,8	4,5	5,4	1,0	135	99	0.00102616	0.0241352	0.623,0.54	0.786,1.0	-0.311
4742	ENSMUSG00000042439.13	Zfp532	chr18	+	65582187	65582453	65582187	65582398	65582896	65583006	4742	0,5	5,5	2,2	1,0	154	99	0.000702564	0.017871	0.0,0.391	0.562,1.0	-0.586
4743	ENSMUSG00000042439.13	Zfp532	chr18	+	65582187	65582582	65582187	65582398	65582896	65583006	4743	7,16	5,5	7,13	1,0	198	99	0.000185319	0.00617288	0.412,0.615	0.778,1.0	-0.376
4744	ENSMUSG00000042439.13	Zfp532	chr18	+	65582187	65582657	65582187	65582398	65582896	65583006	4744	7,12	5,5	7,13	1,0	198	99	8.73687e-05	0.00331735	0.412,0.545	0.778,1.0	-0.41
4745	ENSMUSG00000042439.13	Zfp532	chr18	+	65582187	65582666	65582187	65582398	65582896	65583006	4745	8,12	5,5	7,13	1,0	198	99	9.81066e-05	0.00367746	0.444,0.545	0.778,1.0	-0.394
4870	ENSMUSG00000037236.16	Matr3	chr18	+	35562444	35562595	35562444	35562521	35571842	35572935	4870	9,11	7,15	13,17	2,2	173	99	6.40602e-05	0.00256003	0.424,0.296	0.788,0.829	-0.449
4871	ENSMUSG00000037236.16	Matr3	chr18	+	35562444	35562772	35562444	35562521	35571842	35572935	4871	38,41	7,15	57,63	2,2	198	99	9.12876e-06	0.000509706	0.731,0.577	0.934,0.94	-0.283
4876	ENSMUSG00000037236.16	Matr3	chr18	+	35578904	35579380	35578904	35579364	35581169	35581295	4876	1,0	2,1	5,1	0,0	115	99	1.09879e-05	0.000591284	0.301,0.0	1.0,1.0	-0.85
4888	ENSMUSG00000117694.1	Gm28285	chr18	+	35557336	35557396	35557336	35557369	35577557	35577619	4888	76,83	21,32	69,44	52,32	126	99	0.00058608	0.0154756	0.74,0.671	0.51,0.519	0.191
4908	ENSMUSG00000003779.16	Kif20a	chr18	+	34625032	34625263	34625032	34625052	34625457	34625641	4908	19,46	2,6	37,49	1,0	198	99	0.000324592	0.00971319	0.826,0.793	0.949,1.0	-0.165
4962	ENSMUSG00000024423.6	Impact	chr18	+	12974297	12974540	12974297	12974475	12974712	12974841	4962	6,8	4,3	1,3	0,0	164	99	4.36679e-06	0.000275337	0.475,0.617	1.0,1.0	-0.454
5065	ENSMUSG00000024097.11	Srsf7	chr17	-	80204974	80205438	80205239	80205438	80204312	80204387	5065	9,10	3,2	4,4	0,0	198	99	0.00015067	0.00518087	0.6,0.714	1.0,1.0	-0.343
5068	ENSMUSG00000024097.11	Srsf7	chr17	-	80205239	80205438	80205261	80205438	80204621	80205081	5068	172263	45,77	59,31	72,58	121	99	4.66294e-15	1.99363e-12	0.758,0.736	0.401,0.304	0.394
5083	ENSMUSG00000036368.8	Rmdn2	chr17	+	79667950	79668028	79667950	79668015	79670556	79670655	5083	28,42	6,2	12,15	0,0	112	99	0.00103695	0.024334	0.805,0.949	1.0,1.0	-0.123
5105	ENSMUSG00000024073.16	Birc6	chr17	+	74608096	74608284	74608096	74608185	74609058	74609388	5105	132243	20,46	86,55	2,2	198	99	1.98828e-06	0.000141681	0.767,0.725	0.956,0.932	-0.198
5141	ENSMUSG00000061950.17	Ppp4r1	chr17	+	65782779	65783214	65782779	65783019	65783623	65783668	5141	6,5	14,26	1,0	15,4	198	99	0.00189096	0.03846	0.176,0.088	0.032,0.0	0.116
5248	ENSMUSG00000023944.14	Hsp90ab1	chr17	-	45568857	45569387	45569239	45569387	45568215	45568545	5248	252364	0,0	370378	40,31	198	99	0	0	1.0,1.0	0.822,0.859	0.159
5257	ENSMUSG00000039153.17	Runx2	chr17	-	44734240	44734693	44734346	44734693	44724744	44724901	5257	1,2	0,0	0,1	1,1	198	99	0.000271237	0.00839008	1.0,1.0	0.0,0.333	0.834
5273	ENSMUSG00000036214.14	Znrd1as	chr17	+	36958640	36959116	36958640	36958795	36964356	36964432	5273	9,35	7,4	6,10	0,0	198	99	1.91569e-05	0.000931318	0.391,0.814	1.0,1.0	-0.397
5289	ENSMUSG00000061607.15	Mdc1	chr17	+	35850294	35851005	35850294	35850513	35851112	35851156	5289	54,64	13,7	1,4	10,13	198	99	5.0393e-12	1.48379e-09	0.675,0.821	0.048,0.133	0.657
5329	ENSMUSG00000007036.15	Abhd16a	chr17	+	35091570	35092007	35091570	35091953	35094250	35094336	5329	8,7	0,0	53,30	8,4	153	99	0.000265105	0.00825769	1.0,1.0	0.811,0.829	0.18
5336	ENSMUSG00000007029.16	Vars	chr17	+	35010505	35010984	35010505	35010670	35011204	35011324	5336	39,56	9,7	47,44	0,2	198	99	8.01727e-05	0.00308541	0.684,0.8	1.0,0.917	-0.217
5546	ENSMUSG00000015120.15	Ube2i	chr17	-	25274154	25274310	25274172	25274310	25269402	25269479	5546	35,26	36,44	25,17	7,8	117	99	0.000369119	0.0108073	0.451,0.333	0.751,0.643	-0.305
5566	ENSMUSG00000024158.17	Hagh	chr17	+	24860945	24861418	24860945	24861049	24863676	24863756	5566	0,2	1,6	2,1	0,0	198	99	1.67596e-10	3.7632e-08	0.0,0.143	1.0,1.0	-0.928
5617	ENSMUSG00000024118.14	Tedc2	chr17	-	24216181	24216419	24216249	24216419	24215545	24216005	5617	25,13	36,61	1,4	43,34	167	99	3.38384e-05	0.0014896	0.292,0.112	0.014,0.065	0.162
5619	ENSMUSG00000036820.12	Amdhd2	chr17	-	24157116	24157596	24157527	24157596	24156570	24156672	5619	7,7	163291	35,39	106,87	198	99	0	0	0.021,0.012	0.142,0.183	-0.146
5665	ENSMUSG00000036552.19	Ermard	chr17	+	15061068	15061187	15061068	15061182	15063579	15064230	5665	7,2	22,35	0,0	17,18	104	99	0.000343859	0.0102114	0.232,0.052	0.0,0.0	0.142
5762	ENSMUSG00000025024.7	Smndc1	chr19	-	53389763	53390041	53389862	53390041	53389302	53389422	5762	0,0	1,3	2,1	0,0	198	99	1.32944e-09	2.34425e-07	0.0,0.0	1.0,1.0	-1
5853	ENSMUSG00000002372.9	Ranbp3	chr17	+	56701025	56701525	56701025	56701088	56702762	56702890	5853	8,11	9,14	2,5	23,20	198	99	0.000553507	0.014816	0.308,0.282	0.042,0.111	0.218
5930	ENSMUSG00000003955.8	Fam162a	chr16	-	36071088	36071369	36071277	36071369	36052285	36052408	5930	2,10	3,6	1,0	2,7	198	99	0.000192105	0.00635822	0.25,0.455	0.2,0.0	0.253
5970	ENSMUSG00000022811.17	Zfp148	chr16	+	33380835	33381217	33380835	33380971	33421320	33421402	5970	6,10	0,0	0,2	3,0	198	99	0.00230328	0.0447897	1.0,1.0	0.0,1.0	0.5
6015	ENSMUSG00000097867.1	Lppos	chr16	-	24393353	24393588	24393481	24393588	24391611	24393107	6015	5,9	4,5	2,7	0,0	198	99	7.25101e-07	6.06733e-05	0.385,0.474	1.0,1.0	-0.571
6041	ENSMUSG00000021018.8	Polr2h	chr16	+	20718823	20719089	20718823	20718907	20720518	20720602	6041	31,62	3,7	43,33	0,0	198	99	2.95662e-05	0.00132394	0.838,0.816	1.0,1.0	-0.173
6043	ENSMUSG00000021018.8	Polr2h	chr16	+	20718823	20719089	20718823	20718907	20721909	20722267	6043	31,62	0,0	45,32	13,22	198	99	6.50324e-12	1.86213e-09	1.0,1.0	0.634,0.421	0.473
6044	ENSMUSG00000021018.8	Polr2h	chr16	+	20718990	20719089	20718990	20719084	20721909	20722267	6044	3,11	0,1	7,3	19,6	104	99	2.45237e-08	3.1892e-06	1.0,0.913	0.26,0.322	0.665
6064	ENSMUSG00000022841.15	Ap2m1	chr16	+	20540334	20540813	20540334	20540415	20540974	20541110	6064	8591331	308388	1000857	580558	198	99	2.138e-08	2.80375e-06	0.582,0.632	0.463,0.434	0.158
6216	ENSMUSG00000039473.8	Ubn1	chr16	+	5050733	5051010	5050733	5050740	5053727	5053841	6216	1,3	2,4	5,3	0,0	198	99	8.58113e-08	9.70383e-06	0.2,0.273	1.0,1.0	-0.763
6219	ENSMUSG00000039473.8	Ubn1	chr16	+	5050733	5051010	5050733	5050781	5055076	5055364	6219	6,10	62113	17,15	36,43	198	99	9.64377e-06	0.000530547	0.046,0.042	0.191,0.149	-0.126
6230	ENSMUSG00000039568.6	Ubald1	chr16	-	4876227	4876417	4876361	4876417	4874777	4875869	6230	0,4	194312	36,16	81,73	198	99	0	0	0.0,0.006	0.182,0.099	-0.138
6252	ENSMUSG00000001576.15	Ergic1	chr17	+	26654826	26654938	26654826	26654860	26655066	26656934	6252	31,47	29,39	57,42	9,5	177	99	3.61995e-09	5.82383e-07	0.374,0.403	0.78,0.825	-0.414
6289	ENSMUSG00000097093.2	C330013E15Rik	chr15	-	100614783	100615110	100615049	100615110	100614136	100614690	6289	4,3	0,0	1,1	1,1	198	99	0.00152914	0.0326889	1.0,1.0	0.333,0.333	0.667
6311	ENSMUSG00000089671.1	Gm16537	chr15	-	99724161	99724474	99724316	99724474	99721913	99722160	6311	4,13	2,1	1,0	1,5	198	99	1.44052e-05	0.000731058	0.5,0.867	0.333,0.0	0.517
6313	ENSMUSG00000023009.14	Nckap5l	chr15	-	99423030	99423278	99423135	99423278	99422034	99422908	6313	1,0	25,79	5,2	10,20	198	99	0.000973369	0.0232617	0.02,0.0	0.2,0.048	-0.114
6317	ENSMUSG00000023010.15	Tmbim6	chr15	+	99392985	99393479	99392985	99393040	99399656	99399871	6317	19,23	18,25	19,22	98,80	198	99	1.06929e-06	8.51366e-05	0.345,0.315	0.088,0.121	0.225
6329	ENSMUSG00000023010.15	Tmbim6	chr15	+	99393333	99393694	99393333	99393383	99401579	99401663	6329	42,67	61,48	84,66	19,11	198	99	2.82248e-08	3.61035e-06	0.256,0.411	0.689,0.75	-0.386
6330	ENSMUSG00000023010.15	Tmbim6	chr15	+	99393333	99393730	99393333	99393383	99401579	99401663	6330	58,99	61,48	90,71	19,11	198	99	1.43767e-05	0.000730801	0.322,0.508	0.703,0.763	-0.318
6377	ENSMUSG00000024571.15	Gm16286	chr18	+	80206917	80207061	80206917	80206977	80207153	80207776	6377	47,87	8,3	12,16	0,0	183	99	0.000624686	0.0162883	0.761,0.94	1.0,1.0	-0.149
6538	ENSMUSG00000059714.13	Flot1	chr17	+	35824126	35824321	35824126	35824202	35824565	35824709	6538	12,26	27,23	22,25	6,0	198	99	2.42412e-05	0.00113432	0.182,0.361	0.647,1.0	-0.552
6539	ENSMUSG00000059714.13	Flot1	chr17	+	35824139	35824369	35824139	35824202	35824565	35824709	6539	171239	27,23	285234	6,0	198	99	9.49496e-12	2.62254e-09	0.76,0.839	0.96,1.0	-0.18
6555	ENSMUSG00000022476.8	Polr3h	chr15	-	81925104	81925447	81925242	81925447	81922408	81922505	6555	18,29	5,5	16,10	0,1	198	99	0.000757011	0.0189879	0.643,0.744	1.0,0.833	-0.223
6591	ENSMUSG00000053411.16	Cbx7	chr15	-	79918239	79918473	79918276	79918473	79915806	79918050	6591	0,0	3,14	1,3	2,3	136	99	0.00175857	0.0364938	0.0,0.0	0.267,0.421	-0.344
6624	ENSMUSG00000042211.7	Fbxo38	chr18	-	62548611	62548695	62548652	62548695	62540880	62541046	6624	201289	151192	224235	71,96	140	99	1.12203e-05	0.000598537	0.485,0.516	0.69,0.634	-0.161
6713	ENSMUSG00000053929.17	Cyhr1	chr15	-	76659709	76660108	76659954	76660108	76659218	76659505	6713	2,9	1,4	8,5	1,0	198	99	0.000866805	0.0211855	0.5,0.529	0.8,1.0	-0.386
6750	ENSMUSG00000022553.16	Maf1	chr15	+	76352005	76352288	76352005	76352283	76352419	76352552	6750	3,0	0,1	0,0	1,1	104	99	0.00226927	0.0442664	1.0,0.0	0.0,0.0	0.5
6784	ENSMUSG00000022607.17	Ptk2	chr15	-	73242985	73243247	73243034	73243247	73242365	73242477	6784	5,10	18,26	0,0	1,1	148	99	0.00064392	0.0166507	0.157,0.205	0.0,0.0	0.181
6803	ENSMUSG00000072501.5	Phf20l1	chr15	+	66630866	66631070	66630866	66630966	66632705	66632901	6803	33,36	157246	31,18	17,17	198	99	4.95615e-12	1.4732e-09	0.095,0.068	0.477,0.346	-0.33
6848	ENSMUSG00000051920.7	Rspo2	chr15	-	43169709	43169995	43169730	43169995	43093152	43093341	6848	0,10	9,3	0,0	2,2	120	99	0.00233247	0.0451606	0.0,0.733	0.0,0.0	0.366
6852	ENSMUSG00000115009.1	G930009F23Rik	chr15	-	38454671	38454815	38454770	38454815	38453158	38453403	6852	45,69	218330	61,57	101,78	198	99	6.24239e-10	1.2177e-07	0.094,0.095	0.232,0.268	-0.155
6905	ENSMUSG00000022412.14	Mief1	chr15	+	80234310	80234780	80234310	80234558	80235804	80236153	6905	92162	6,13	60,54	15,16	198	99	4.93128e-05	0.00205762	0.885,0.862	0.667,0.628	0.226
7005	ENSMUSG00000042104.18	Uggt2	chr14	-	119032628	119032787	119032690	119032787	119032193	119032296	7005	7,5	4,6	1,1	0,0	161	99	7.34157e-07	6.10389e-05	0.518,0.339	1.0,1.0	-0.572
7049	ENSMUSG00000022064.10	Pibf1	chr14	+	99101028	99101301	99101028	99101173	99107298	99107764	7049	3,28	2,0	2,0	2,2	198	99	0.000222537	0.00716043	0.429,1.0	0.333,0.0	0.548
7068	ENSMUSG00000022529.11	Zfp263	chr16	+	3746421	3746853	3746421	3746495	3748148	3748265	7068	11,25	0,0	22,15	4,2	198	99	0.000246277	0.00778281	1.0,1.0	0.733,0.789	0.239
7114	ENSMUSG00000022000.11	Zc3h13	chr14	+	75339308	75339489	75339308	75339485	75343593	75344426	7114	1,0	4,1	4,1	0,0	103	99	3.34546e-09	5.49553e-07	0.194,0.0	1.0,1.0	-0.903
7126	ENSMUSG00000033487.14	Fndc3a	chr14	-	72574216	72574680	72574522	72574680	72573289	72573428	7126	3,10	3,2	10,11	0,0	198	99	2.4624e-05	0.00114707	0.333,0.714	1.0,1.0	-0.477
7143	ENSMUSG00000022091.6	Sorbs3	chr14	-	70201348	70201542	70201403	70201542	70199281	70199345	7143	7,13	0,6	7,8	0,0	154	99	0.000615779	0.0161234	1.0,0.582	1.0,1.0	-0.209
7150	ENSMUSG00000022089.9	Bin3	chr14	+	70123840	70124042	70123840	70123917	70124182	70124244	7150	5,2	3,1	27,17	0,0	198	99	3.26004e-05	0.00144325	0.455,0.5	1.0,1.0	-0.522
7176	ENSMUSG00000031109.16	Enox2	chrX	-	49023093	49023201	49023126	49023201	49018782	49018891	7176	25,36	5,2	10,15	0,0	132	99	0.000830674	0.020495	0.789,0.931	1.0,1.0	-0.14
7229	ENSMUSG00000021945.9	Zmym2	chr14	+	56886652	56886956	56886652	56886698	56887794	56887857	7229	150150	76,97	51,48	102,76	198	99	5.07161e-10	1.00822e-07	0.497,0.436	0.2,0.24	0.247
7235	ENSMUSG00000021945.9	Zmym2	chr14	+	56886652	56886956	56886652	56886698	56902695	56903867	7235	4,2	8,1	0,0	18,13	198	99	0.000219921	0.00709088	0.2,0.5	0.0,0.0	0.35
7273	ENSMUSG00000040618.7	Pck2	chr14	+	55544362	55544593	55544362	55544493	55544884	55545047	7273	14,27	4,1	17,25	0,0	198	99	0.00138798	0.0303768	0.636,0.931	1.0,1.0	-0.216
7274	ENSMUSG00000040618.7	Pck2	chr14	+	55544362	55544725	55544362	55544493	55544884	55545047	7274	13,8	4,1	17,25	0,0	198	99	0.000154545	0.00529473	0.619,0.8	1.0,1.0	-0.29
7318	ENSMUSG00000023110.12	Prmt5	chr14	-	54517036	54517435	54517246	54517435	54516105	54516191	7318	46,66	25,43	43,29	8,6	198	99	0.000326355	0.00975659	0.479,0.434	0.729,0.707	-0.261
7369	ENSMUSG00000049295.17	Zfp219	chr14	-	52014151	52014582	52014505	52014582	52009969	52010058	7369	3,2	25,14	16,6	12,20	198	99	0.00202194	0.0404081	0.057,0.067	0.4,0.13	-0.203
7374	ENSMUSG00000049295.17	Zfp219	chr14	-	52019596	52019995	52019747	52019995	52009969	52010058	7374	5,3	4,4	10,2	0,0	198	99	3.80548e-08	4.6761e-06	0.385,0.273	1.0,1.0	-0.671
7377	ENSMUSG00000004562.16	Arhgef40	chr14	+	51987115	51987598	51987115	51987536	51988701	51989938	7377	0,2	5,7	1,1	0,0	161	99	5.9716e-10	1.1722e-07	0.0,0.149	1.0,1.0	-0.925
7394	ENSMUSG00000035953.14	Pip4p1	chr14	-	50928744	50929058	50929005	50929058	50927865	50928037	7394	26,27	2,9	28,30	0,1	198	99	9.89139e-05	0.00369725	0.867,0.6	1.0,0.938	-0.235
7398	ENSMUSG00000035960.14	Apex1	chr14	+	50924967	50925140	50924967	50925003	50925212	50925324	7398	0,2	4,0	2,3	0,0	198	99	0.0010722	0.0248588	0.0,1.0	1.0,1.0	-0.5
7428	ENSMUSG00000022403.15	St13	chr15	-	81399579	81400073	81399788	81400073	81392270	81392322	7428	29,29	4,5	29,17	0,0	198	99	2.30361e-05	0.00108771	0.784,0.744	1.0,1.0	-0.236
7457	ENSMUSG00000024436.16	Mrps18b	chr17	-	35914333	35914792	35914491	35914792	35910378	35910956	7457	7,7	0,0	5,9	3,2	198	99	3.11018e-05	0.00138674	1.0,1.0	0.455,0.692	0.426
7574	ENSMUSG00000025290.17	Rps24	chr14	+	24491291	24491461	24491291	24491314	24491749	24491817	7574	0,3	2,3	2,2	0,0	198	99	3.09134e-08	3.85936e-06	0.0,0.333	1.0,1.0	-0.834
7586	ENSMUSG00000046873.18	Mbtps2	chrX	-	157598310	157598643	157598319	157598643	157593724	157593873	7586	3,5	0,1	2,0	1,2	108	99	0.000888337	0.021543	1.0,0.821	0.647,0.0	0.587
7611	ENSMUSG00000048154.17	Kmt2d	chr15	-	98856606	98856828	98856612	98856828	98856269	98856389	7611	12,21	7,9	12,10	1,1	105	99	0.0016886	0.0353237	0.618,0.688	0.919,0.904	-0.258
7729	ENSMUSG00000094870.8	Zfp131	chr13	-	119778106	119778520	119778432	119778520	119776308	119776449	7729	11,9	9,10	3,0	10,6	198	99	0.00106568	0.0248031	0.379,0.31	0.13,0.0	0.28
7795	ENSMUSG00000046169.10	Adamts6	chr13	+	104444798	104445211	104444798	104444953	104445615	104445704	7795	22,33	7,13	13,3	0,1	198	99	0.000891845	0.0216113	0.611,0.559	1.0,0.6	-0.215
7839	ENSMUSG00000021635.14	Rad17	chr13	-	100650599	100651002	100650949	100651002	100649677	100649781	7839	9,19	108135	22,13	46,32	198	99	8.09339e-06	0.000467783	0.04,0.066	0.193,0.169	-0.128
7842	ENSMUSG00000021635.14	Rad17	chr13	-	100650739	100651002	100650949	100651002	100649677	100649781	7842	9,19	108135	22,11	46,32	198	99	2.71031e-05	0.00123132	0.04,0.066	0.193,0.147	-0.117
7921	ENSMUSG00000021537.9	Cetn3	chr13	+	81783522	81783879	81783522	81783715	81784640	81784776	7921	4,8	2,3	1,2	0,0	198	99	6.87961e-05	0.00271453	0.5,0.571	1.0,1.0	-0.465
7932	ENSMUSG00000113047.1	Gm47469	chr13	-	74563927	74564256	74564137	74564256	74563738	74563824	7932	2,7	10,17	0,0	6,2	198	99	0.000623015	0.0162583	0.091,0.171	0.0,0.0	0.131
7970	ENSMUSG00000021514.18	Zfp369	chr13	+	65278813	65279118	65278813	65278987	65279260	65279340	7970	119176	39,88	109,96	24,8	198	99	0.00054128	0.0145136	0.604,0.5	0.694,0.857	-0.223
7978	ENSMUSG00000021482.10	Prxl2c	chr13	-	64297015	64297174	64297127	64297174	64291826	64292228	7978	2,9	16,10	18,25	3,5	198	99	1.25964e-06	9.70735e-05	0.059,0.31	0.75,0.714	-0.547
8096	ENSMUSG00000062248.5	Cks2	chr13	+	51645231	51645507	51645231	51645465	51649584	51649712	8096	11,14	0,0	31,19	4,5	141	99	0.000105144	0.0038836	1.0,1.0	0.845,0.727	0.214
8113	ENSMUSG00000037960.11	Card19	chr13	-	49215866	49216037	49215936	49216037	49210088	49210203	8113	2,8	15,18	39,31	24,14	169	99	4.92492e-06	0.000304984	0.072,0.207	0.488,0.565	-0.387
8133	ENSMUSG00000000253.13	Gmpr	chr13	+	45520031	45520184	45520031	45520175	45520851	45521025	8133	1,4	1,8	0,0	2,3	108	99	0.000255616	0.00802619	0.478,0.314	0.0,0.0	0.396
8185	ENSMUSG00000025428.15	Atp5a1	chr18	+	77774441	77774925	77774441	77774543	77775776	77775855	8185	0,0	4,3	2,6	0,3	198	99	4.89872e-06	0.000303964	0.0,0.0	1.0,0.5	-0.75
8212	ENSMUSG00000021411.16	Pxdc1	chr13	-	34637153	34637307	34637247	34637307	34630350	34630462	8212	7,8	13,10	0,0	2,1	193	99	0.000192927	0.00636219	0.216,0.291	0.0,0.0	0.254
8285	ENSMUSG00000039242.10	B3galnt2	chr13	+	13996892	13997052	13996892	13997048	13998378	13999103	8285	8,12	3,5	6,1	0,0	103	99	7.82532e-05	0.00302272	0.719,0.698	1.0,1.0	-0.292
8360	ENSMUSG00000021175.15	Cdca7l	chr12	+	117876905	117877372	117876905	117877370	117877466	117878706	8360	0,0	1,2	6,8	10,13	101	99	6.13825e-05	0.00245932	0.0,0.0	0.37,0.376	-0.373
8364	ENSMUSG00000042029.7	Ncapg2	chr12	+	116405401	116405701	116405401	116405475	116407197	116407310	8364	5,10	5,8	2,4	0,1	198	99	0.00118631	0.0270261	0.333,0.385	1.0,0.667	-0.475
8377	ENSMUSG00000021171.8	Esyt2	chr12	+	116369991	116370204	116369991	116370061	116389433	116391050	8377	14,14	3,5	11,4	0,0	198	99	1.03657e-05	0.000559732	0.7,0.583	1.0,1.0	-0.359
8378	ENSMUSG00000021171.8	Esyt2	chr12	+	116369991	116370227	116369991	116370061	116389433	116391050	8378	9,18	3,5	10,4	0,0	198	99	2.08824e-05	0.00100117	0.6,0.643	1.0,1.0	-0.379
8417	ENSMUSG00000002799.6	Jag2	chr12	-	112915604	112915960	112915879	112915960	112915470	112915517	8417	204307	165263	193203	58,72	198	99	1.46126e-09	2.53375e-07	0.382,0.369	0.625,0.585	-0.229
8457	ENSMUSG00000037957.14	Wdr20	chr12	+	110737943	110738277	110737943	110738092	110779295	110779478	8457	64105	0,18	82,62	1,0	198	99	0.000126533	0.00448774	1.0,0.745	0.976,1.0	-0.115
8471	ENSMUSG00000040867.12	Begain	chr12	-	109035216	109035411	109035327	109035411	109032186	109034351	8471	1,0	5,6	3,2	0,1	198	99	2.26061e-06	0.00015714	0.091,0.0	1.0,0.5	-0.705
8529	ENSMUSG00000024150.12	Mcfd2	chr17	-	87258749	87259092	87258933	87259092	87257927	87258089	8529	46,61	5,2	14,7	0,0	198	99	0.00161933	0.0342882	0.821,0.938	1.0,1.0	-0.121
8656	ENSMUSG00000024659.15	Anxa1	chr19	-	20388474	20388693	20388673	20388693	20384692	20384772	8656	9,11	1,4	2,5	0,0	198	99	0.000147992	0.00511515	0.818,0.579	1.0,1.0	-0.302
8658	ENSMUSG00000024659.15	Anxa1	chr19	-	20388620	20388693	20388673	20388693	20384692	20384772	8658	1,5	1,4	2,5	0,0	152	99	1.98931e-05	0.000959636	0.394,0.449	1.0,1.0	-0.579
8663	ENSMUSG00000024659.15	Anxa1	chr19	-	20390475	20390651	20390554	20390651	20384692	20384772	8663	0,4	4,7	1,2	0,0	178	99	1.64331e-09	2.83366e-07	0.0,0.241	1.0,1.0	-0.879
8693	ENSMUSG00000092232.1	Gm20521	chr14	+	54883440	54883704	54883440	54883506	54883796	54883884	8693	58,48	67,82	14,16	85,66	198	99	2.08472e-07	2.07217e-05	0.302,0.226	0.076,0.108	0.172
8720	ENSMUSG00000021714.15	Cenpk	chr13	+	104228954	104229124	104228954	104229084	104230728	104230879	8720	1,7	6,17	0,0	3,5	139	99	0.00032353	0.00969068	0.106,0.227	0.0,0.0	0.167
8727	ENSMUSG00000021134.17	Srsf5	chr12	+	80948128	80948555	80948128	80948466	80949094	80949168	8727	1,8	7,8	34,24	3,2	188	99	4.40949e-07	3.95473e-05	0.07,0.345	0.856,0.863	-0.652
8755	ENSMUSG00000059436.13	Max	chr12	-	76939413	76939514	76939425	76939514	76938746	76938755	8755	9,26	10,12	16,23	3,1	111	99	0.000418246	0.0118915	0.445,0.659	0.826,0.954	-0.338
8812	ENSMUSG00000060073.9	Psma3	chr12	+	70978732	70979008	70978732	70978815	70988423	70988489	8812	16,10	2,0	11,10	13,7	198	99	1.51207e-05	0.000761181	0.8,1.0	0.297,0.417	0.543
8830	ENSMUSG00000020982.9	Nemf	chr12	-	69356641	69357134	69357045	69357134	69356278	69356347	8830	1,3	0,0	0,1	2,0	198	99	0.00119564	0.0271003	1.0,1.0	0.0,1.0	0.5
8869	ENSMUSG00000021023.14	1110008L16Rik	chr12	+	55303285	55303337	55303285	55303291	55303615	55304884	8869	4,16	10,2	3,5	1,0	145	99	0.00265046	0.0494905	0.215,0.845	0.672,1.0	-0.306
8913	ENSMUSG00000020954.16	Strn3	chr12	-	51647686	51648131	51648005	51648131	51629373	51629507	8913	1,1	12,10	3,2	2,1	198	99	0.00192934	0.0390316	0.04,0.048	0.429,0.5	-0.421
8982	ENSMUSG00000061477.4	Rps7	chr12	-	28633071	28633214	28633086	28633214	28631623	28631774	8982	4,1	2,2	1,0	4,7	114	99	0.000504948	0.0137641	0.635,0.303	0.178,0.0	0.38
9030	ENSMUSG00000021843.17	Ktn1	chr14	+	47700640	47701132	47700640	47700654	47701674	47701743	9030	5,6	2,11	2,7	0,0	198	99	1.65372e-07	1.72433e-05	0.556,0.214	1.0,1.0	-0.615
9084	ENSMUSG00000020594.14	Pum2	chr12	+	8674133	8674288	8674133	8674170	8698090	8698159	9084	0,2	17,18	5,7	8,8	198	99	2.68728e-05	0.00122442	0.0,0.053	0.238,0.304	-0.245
9086	ENSMUSG00000020594.14	Pum2	chr12	+	8674133	8674288	8674133	8674264	8698090	8698159	9086	0,2	2,6	5,7	4,1	123	99	0.000960269	0.0230015	0.0,0.212	0.502,0.849	-0.57
9108	ENSMUSG00000051721.6	Wdcp	chr12	+	4843327	4843617	4843327	4843451	4848862	4849343	9108	17,18	41,93	0,0	191142	198	99	2.44249e-15	1.08904e-12	0.172,0.088	0.0,0.0	0.13
9125	ENSMUSG00000020657.16	Dnajc27	chr12	+	4106801	4107043	4106801	4106984	4107158	4107348	9125	4,13	3,2	23,29	0,0	158	99	0.000162595	0.00553407	0.455,0.803	1.0,1.0	-0.371
9126	ENSMUSG00000020657.16	Dnajc27	chr12	+	4106801	4107043	4106801	4106984	4107549	4109204	9126	0,2	1,2	2,2	1,0	158	99	0.00040861	0.0116894	0.0,0.385	0.556,1.0	-0.586
9227	ENSMUSG00000025377.14	Tepsin	chr11	-	120097483	120097581	120097508	120097581	120096877	120096969	9227	4,8	23,26	1,0	15,8	124	99	0.000838053	0.0206281	0.122,0.197	0.051,0.0	0.134
9241	ENSMUSG00000025579.14	Gaa	chr11	+	119273974	119274218	119273974	119274140	119274640	119274760	9241	3,4	0,0	1,1	1,1	177	99	0.00238966	0.0460392	1.0,1.0	0.359,0.359	0.641
9295	ENSMUSG00000061878.15	Sphk1	chr11	+	116533250	116533665	116533250	116533368	116533969	116534318	9295	15,22	99139	28,27	47,39	198	99	7.66725e-08	8.79789e-06	0.07,0.073	0.23,0.257	-0.172
9325	ENSMUSG00000020770.13	Unk	chr11	+	116053015	116053249	116053015	116053119	116053489	116053690	9325	43,60	17,24	19,12	26,33	198	99	3.63562e-07	3.37712e-05	0.558,0.556	0.268,0.154	0.346
9389	ENSMUSG00000020610.16	Amz2	chr11	+	109425945	109426390	109425945	109425958	109426485	109426575	9389	0,0	2,4	7,0	0,1	198	99	0.0018114	0.037268	0.0,0.0	1.0,0.0	-0.5
9466	ENSMUSG00000002320.15	Tm9sf1	chr14	-	55643079	55643315	55643261	55643315	55642593	55642955	9466	139202	3,7	122136	14,15	198	99	0.000113773	0.0041147	0.959,0.935	0.813,0.819	0.131
9539	ENSMUSG00000017176.17	Nt5c3b	chr11	-	100439762	100440254	100440184	100440254	100436154	100436240	9539	4,7	11,18	8,4	2,2	198	99	0.00129137	0.0288305	0.154,0.163	0.667,0.5	-0.425
9555	ENSMUSG00000037935.16	Smarce1	chr11	-	99230038	99230413	99230172	99230413	99228496	99228548	9555	1,1	2,2	2,2	0,1	198	99	0.00162085	0.0342971	0.2,0.2	1.0,0.5	-0.55
9561	ENSMUSG00000017493.12	Igfbp4	chr11	+	99041759	99042128	99041759	99041850	99048225	99048371	9561	10,13	1,4	1,3	6,4	198	99	0.000216991	0.00701089	0.833,0.619	0.077,0.273	0.551
9609	ENSMUSG00000036299.5	BC031181	chr18	+	75005867	75006213	75005867	75006014	75008650	75008826	9609	175256	172225	107,92	35,37	198	99	1.79145e-07	1.83924e-05	0.337,0.363	0.605,0.554	-0.23
9615	ENSMUSG00000017404.12	Rpl19	chr11	+	98026923	98027313	98026923	98027026	98027822	98028147	9615	0,1	5,6	6,1	2,5	198	99	0.00177386	0.0367622	0.0,0.077	0.6,0.091	-0.307
9623	ENSMUSG00000017404.12	Rpl19	chr11	+	98026956	98027454	98026956	98027313	98027822	98028147	9623	5,9	0,1	1,1	6,1	198	99	1.77437e-07	1.82772e-05	1.0,0.818	0.077,0.333	0.704
9656	ENSMUSG00000001441.13	Npepps	chr11	-	97241733	97242047	97241950	97242047	97240928	97241043	9656	8,4	0,0	27,30	4,6	198	99	0.000122557	0.00436658	1.0,1.0	0.771,0.714	0.258
9676	ENSMUSG00000078700.10	D030028A08Rik	chr11	+	96944164	96944279	96944164	96944214	96944844	96945093	9676	2,5	9,6	0,0	4,2	164	99	0.000319309	0.00959188	0.118,0.335	0.0,0.0	0.227
9769	ENSMUSG00000091228.1	Gm20390	chr11	-	93967956	93968293	93968079	93968293	93965807	93965937	9769	4,9	3,2	2,3	0,0	198	99	2.37917e-05	0.00111832	0.4,0.692	1.0,1.0	-0.454
9773	ENSMUSG00000091228.1	Gm20390	chr11	-	93967956	93968293	93968243	93968293	93965807	93965937	9773	5,10	8,8	3,3	0,0	198	99	1.59918e-06	0.000118919	0.238,0.385	1.0,1.0	-0.689
9778	ENSMUSG00000091228.1	Gm20390	chr11	-	93967960	93968293	93968243	93968293	93965807	93965937	9778	29,53	8,8	6,35	0,0	198	99	3.90199e-06	0.000251103	0.644,0.768	1.0,1.0	-0.294
9785	ENSMUSG00000091228.1	Gm20390	chr11	-	93968173	93968293	93968243	93968293	93965807	93965937	9785	3,12	8,8	4,3	0,0	169	99	7.90901e-07	6.496e-05	0.18,0.468	1.0,1.0	-0.676
9787	ENSMUSG00000091228.1	Gm20390	chr11	-	93968186	93968293	93968243	93968293	93965807	93965937	9787	1,1	8,8	1,1	0,0	156	99	9.7793e-08	1.08235e-05	0.073,0.073	1.0,1.0	-0.927
9824	ENSMUSG00000020485.14	Supt4a	chr11	+	87737551	87737658	87737551	87737593	87738166	87738273	9824	0,5	23,10	31,20	24,37	164	99	0.000799001	0.0199023	0.0,0.232	0.438,0.246	-0.226
9829	ENSMUSG00000020485.14	Supt4a	chr11	+	87737551	87737658	87737551	87737614	87738166	87738273	9829	0,5	6,12	31,20	15,7	143	99	3.8266e-05	0.00164055	0.0,0.224	0.589,0.664	-0.515
9867	ENSMUSG00000020516.15	Rps6kb1	chr11	-	86513295	86513390	86513299	86513390	86512805	86512913	9867	4,4	232346	2,6	40,25	103	99	0.000815968	0.0202442	0.016,0.011	0.046,0.187	-0.103
9870	ENSMUSG00000020516.15	Rps6kb1	chr11	-	86517232	86517392	86517349	86517392	86516090	86516191	9870	13,15	6,14	11,8	1,0	198	99	1.11339e-05	0.000596686	0.52,0.349	0.846,1.0	-0.489
9913	ENSMUSG00000000976.13	Heatr6	chr11	+	83753695	83754051	83753695	83753941	83755709	83755817	9913	12,13	69126	20,17	28,21	198	99	2.51427e-08	3.25614e-06	0.08,0.049	0.263,0.288	-0.211
9928	ENSMUSG00000020692.14	Nle1	chr11	-	82904487	82904636	82904634	82904636	82904239	82904375	9928	4,6	0,1	0,0	6,4	198	99	7.81947e-11	1.863e-08	1.0,0.75	0.0,0.0	0.875
9984	ENSMUSG00000017677.11	Wsb1	chr11	-	79242498	79242640	79242606	79242640	79241983	79242156	9984	32,51	3,4	5,1	0,0	198	99	0.00181915	0.0373685	0.842,0.864	1.0,1.0	-0.147
10027	ENSMUSG00000002064.10	Sdf2	chr11	+	78245745	78246154	78245745	78245844	78251015	78251212	10027	0,4	2,1	2,3	0,0	198	99	0.000626	0.0163089	0.0,0.667	1.0,1.0	-0.666
10093	ENSMUSG00000020849.13	Ywhae	chr11	+	75733147	75733245	75733147	75733203	75751880	75752080	10093	7,1	0,1	3,2	4,1	141	99	0.00225935	0.044128	1.0,0.413	0.345,0.584	0.242
10194	ENSMUSG00000040599.13	Mis12	chr11	+	71019610	71020038	71019610	71019723	71024549	71024711	10194	125146	18,35	43,35	3,1	198	99	0.00102187	0.0240524	0.776,0.676	0.878,0.946	-0.186
10243	ENSMUSG00000060600.15	Eno3	chr11	+	70657201	70657376	70657201	70657272	70657871	70657958	10243	7,10	4,10	1,0	1,4	198	99	0.000855609	0.0209446	0.467,0.333	0.333,0.0	0.234
10244	ENSMUSG00000060600.15	Eno3	chr11	+	70657201	70657376	70657201	70657279	70657871	70657958	10244	7,10	34,26	1,0	15,23	196	99	7.60545e-05	0.00294143	0.094,0.163	0.033,0.0	0.112
10322	ENSMUSG00000001588.12	Acap1	chr11	-	69884045	69884491	69884091	69884491	69883583	69883756	10322	1,6	4,8	1,3	0,0	145	99	9.24171e-08	1.03756e-05	0.146,0.339	1.0,1.0	-0.758
10324	ENSMUSG00000001588.12	Acap1	chr11	-	69884091	69884491	69884321	69884491	69883583	69883756	10324	4,8	4,21	0,0	2,1	198	99	0.00042284	0.0119757	0.333,0.16	0.0,0.0	0.246
10334	ENSMUSG00000041189.9	Chrnb1	chr11	-	69794896	69795013	69794968	69795013	69794149	69794259	10334	2,9	13,18	0,0	28,26	171	99	6.74551e-06	0.000401782	0.082,0.224	0.0,0.0	0.153
10347	ENSMUSG00000059552.13	Trp53	chr11	+	69581053	69581465	69581053	69581155	69586890	69586973	10347	13,1	2,3	0,0	1,2	198	99	5.97888e-05	0.00240709	0.765,0.143	0.0,0.0	0.454
10354	ENSMUSG00000018474.17	Chd3	chr11	-	69346571	69346675	69346617	69346675	69345470	69345634	10354	48102	111233	181143	159176	145	99	2.52689e-06	0.000172575	0.228,0.23	0.437,0.357	-0.168
10385	ENSMUSG00000020903.13	Stx8	chr11	+	68019641	68020113	68019641	68020079	68020905	68020998	10385	0,0	2,1	2,1	0,0	133	99	5.17109e-09	7.87293e-07	0.0,0.0	1.0,1.0	-1
10418	ENSMUSG00000001034.17	Mapk7	chr11	-	61492849	61493069	61492903	61493069	61491425	61491686	10418	7,15	106174	17,15	42,31	153	99	9.42016e-08	1.05381e-05	0.041,0.053	0.208,0.238	-0.176
10420	ENSMUSG00000001034.17	Mapk7	chr11	-	61492778	61493069	61492903	61493069	61491641	61491686	10420	3,7	106174	8,13	42,31	198	99	3.45451e-07	3.2378e-05	0.014,0.02	0.087,0.173	-0.113
10600	ENSMUSG00000018906.14	P4ha2	chr11	+	54126221	54126411	54126221	54126297	54129047	54129116	10600	8141140	12131816	421404	374272	198	99	7.91994e-09	1.15509e-06	0.251,0.239	0.36,0.426	-0.148
10691	ENSMUSG00000007850.16	Hnrnph1	chr11	+	50383241	50383727	50383241	50383314	50383830	50383920	10691	16,7	35,60	29,25	28,25	198	99	1.41797e-05	0.000723141	0.186,0.055	0.341,0.333	-0.217
10751	ENSMUSG00000020397.15	Med7	chr11	+	46436973	46437430	46436973	46437191	46439805	46439975	10751	15,15	112111	16,18	37,38	198	99	7.09341e-05	0.00277782	0.063,0.063	0.178,0.191	-0.121
10788	ENSMUSG00000057113.13	Npm1	chr11	-	33160827	33161251	33161105	33161251	33159933	33159995	10788	34,64	0,0	88,47	2,5	198	99	0.00166537	0.0349544	1.0,1.0	0.957,0.825	0.109
10818	ENSMUSG00000060992.9	Copz1	chr15	+	103296532	103296842	103296532	103296610	103297886	103299865	10818	6,4	1,5	4,5	0,0	198	99	8.50245e-06	0.000484252	0.75,0.286	1.0,1.0	-0.482
10855	ENSMUSG00000049811.16	Fam161a	chr11	+	23008346	23008631	23008346	23008626	23015658	23015884	10855	0,1	1,1	5,1	1,1	104	99	0.00206536	0.0410324	0.0,0.488	0.826,0.488	-0.413
10889	ENSMUSG00000031157.10	Pqbp1	chrX	-	7898768	7899000	7898965	7899000	7898550	7898636	10889	0,2	2,4	3,3	2,0	198	99	0.00250289	0.0474879	0.0,0.2	0.429,1.0	-0.615
10895	ENSMUSG00000031157.10	Pqbp1	chrX	-	7898774	7899000	7898965	7899000	7898550	7898636	10895	0,2	2,4	7,2	2,0	198	99	0.000272537	0.00841359	0.0,0.2	0.636,1.0	-0.718
11112	ENSMUSG00000025351.14	Cd63	chr10	+	128909344	128909522	128909344	128909511	128910394	128910471	11112	7,16	4,4	8,12	1,0	110	99	0.000725507	0.0183202	0.612,0.783	0.878,1.0	-0.242
11121	ENSMUSG00000025351.14	Cd63	chr10	+	128910394	128910889	128910394	128910812	128911451	128911640	11121	10,11	1,2	4,2	8,5	176	99	1.18818e-05	0.000630684	0.849,0.756	0.22,0.184	0.601
11122	ENSMUSG00000025351.14	Cd63	chr10	+	128910621	128910812	128910621	128910775	128911451	128911640	11122	1,2	28,44	8,5	18,30	136	99	0.000535497	0.0144081	0.025,0.032	0.244,0.108	-0.147
11150	ENSMUSG00000064030.15	Pym1	chr10	+	128765146	128765391	128765146	128765240	128765609	128766564	11150	19,32	143258	58,38	91,66	198	99	4.60521e-13	1.64711e-10	0.062,0.058	0.242,0.224	-0.173
11219	ENSMUSG00000090841.2	Myl6	chr10	-	128492626	128493031	128492938	128493031	128492228	128492535	11219	40,70	6,3	53,42	0,0	198	99	0.000117211	0.00420491	0.769,0.921	1.0,1.0	-0.155
11221	ENSMUSG00000090841.2	Myl6	chr10	-	128492635	128493031	128492938	128493031	128492228	128492535	11221	42,71	6,3	52,42	0,0	198	99	0.000132624	0.0046614	0.778,0.922	1.0,1.0	-0.15
11222	ENSMUSG00000090841.2	Myl6	chr10	-	128492709	128493031	128492938	128493031	128492228	128492535	11222	46,73	6,3	52,42	0,0	198	99	0.000162276	0.00552925	0.793,0.924	1.0,1.0	-0.141
11244	ENSMUSG00000015837.15	Sqstm1	chr11	-	50202288	50202429	50202398	50202429	50200166	50200947	11244	34,53	24273802	1168927	44673688	198	99	0	0	0.007,0.007	0.116,0.112	-0.107
11297	ENSMUSG00000006731.10	B4galnt1	chr10	+	127165377	127165856	127165377	127165519	127166003	127166222	11297	12,12	92165	13,24	52,35	198	99	7.06947e-06	0.000418682	0.061,0.035	0.111,0.255	-0.135
11376	ENSMUSG00000063011.7	Msln	chr17	-	25753377	25753839	25753773	25753839	25752941	25753062	11376	34,42	8,0	150121	2,1	198	99	0.00267267	0.0498011	0.68,1.0	0.974,0.984	-0.139
11441	ENSMUSG00000036985.12	Zdhhc9	chrX	-	48207831	48208328	48208122	48208328	48206667	48206957	11441	4,4	6,3	8,21	0,1	198	99	3.18669e-07	3.01394e-05	0.25,0.4	1.0,0.913	-0.631
11445	ENSMUSG00000020128.15	Vps54	chr11	+	21263198	21263354	21263198	21263287	21264665	21264871	11445	71104	4,7	55,40	12,8	166	99	0.00193247	0.0390637	0.914,0.899	0.732,0.749	0.166
11468	ENSMUSG00000005682.9	Pan2	chr10	+	128317893	128318342	128317893	128318033	128318944	128319038	11468	96152	3,7	49,39	10,13	198	99	2.14441e-06	0.000151081	0.941,0.916	0.71,0.6	0.273
11515	ENSMUSG00000020530.14	Ggnbp2	chr11	-	84870360	84870725	84870673	84870725	84869876	84870072	11515	85110	12,6	147136	35,29	198	99	0.0025311	0.0479068	0.78,0.902	0.677,0.701	0.152
11520	ENSMUSG00000020530.14	Ggnbp2	chr11	-	84870673	84870779	84870689	84870779	84869876	84870072	11520	13,7	5,12	35,31	4,3	115	99	0.00061296	0.0160631	0.691,0.334	0.883,0.899	-0.379
11574	ENSMUSG00000021282.17	Eif5	chr12	+	111539550	111539911	111539550	111539687	111540129	111540302	11574	46,71	8,11	50,66	2,1	198	99	0.000107642	0.0039525	0.742,0.763	0.926,0.971	-0.196
11694	ENSMUSG00000020190.13	Mknk2	chr10	-	80676080	80676293	80676122	80676293	80675823	80675940	11694	48,78	125186	142118	97112	141	99	4.00703e-10	8.22785e-08	0.212,0.227	0.507,0.425	-0.246
11707	ENSMUSG00000035370.9	Gm49322	chr10	+	80609212	80609458	80609212	80609424	80611027	80611129	11707	7,28	8,2	2,5	0,0	133	99	0.000139064	0.00485495	0.394,0.912	1.0,1.0	-0.347
11742	ENSMUSG00000035478.14	Mbd3	chr10	-	80398970	80399422	80399217	80399422	80395435	80395595	11742	200203	587881	307264	378335	198	99	1.11022e-16	5.41425e-14	0.146,0.103	0.289,0.283	-0.161
11772	ENSMUSG00000022443.17	Myh9	chr15	-	77841939	77842047	77841962	77842047	77812879	77813231	11772	18,20	0,0	7,14	5,1	122	99	0.000147361	0.00510079	1.0,1.0	0.532,0.919	0.274
11816	ENSMUSG00000006498.16	Ptbp1	chr10	+	79857860	79858315	79857860	79857990	79858751	79859271	11816	1,1	1,3	1,1	0,0	198	99	3.79411e-07	3.48288e-05	0.333,0.143	1.0,1.0	-0.762
11817	ENSMUSG00000006498.16	Ptbp1	chr10	+	79858731	79858981	79858731	79858824	79859071	79859271	11817	8,9	13,22	10,6	2,2	198	99	0.000221257	0.00712659	0.235,0.17	0.714,0.6	-0.455
11826	ENSMUSG00000035890.9	Rnf126	chr10	-	79761161	79761311	79761210	79761311	79761039	79761082	11826	0,0	5,8	4,1	6,1	148	99	0.000443638	0.0124529	0.0,0.0	0.308,0.401	-0.355
11858	ENSMUSG00000023175.15	Bsg	chr10	+	79704490	79704800	79704490	79704628	79709670	79709827	11858	10,5	6,2	12,10	57,50	198	99	2.07626e-05	0.000996955	0.455,0.556	0.095,0.091	0.413
11861	ENSMUSG00000023175.15	Bsg	chr10	+	79709597	79709821	79709597	79709783	79710057	79710140	11861	0,4	4,4	5,14	0,0	137	99	4.6649e-09	7.20773e-07	0.0,0.419	1.0,1.0	-0.79
11863	ENSMUSG00000023175.15	Bsg	chr10	+	79709597	79709953	79709597	79709783	79710057	79710140	11863	0,4	4,4	3,7	0,0	198	99	3.62458e-10	7.49184e-08	0.0,0.333	1.0,1.0	-0.834
11885	ENSMUSG00000042570.14	Mier2	chr10	-	79542032	79542481	79542377	79542481	79541513	79541934	11885	0,0	8,14	3,3	3,1	198	99	1.2548e-05	0.000659319	0.0,0.0	0.333,0.6	-0.467
11886	ENSMUSG00000042570.14	Mier2	chr10	-	79542032	79542481	79542404	79542481	79541513	79541934	11886	35,70	70103	46,51	18,23	198	99	8.29878e-09	1.20471e-06	0.2,0.254	0.561,0.526	-0.317
11888	ENSMUSG00000042570.14	Mier2	chr10	-	79542048	79542481	79542404	79542481	79541513	79541934	11888	35,70	70103	43,49	18,23	198	99	3.87103e-08	4.71948e-06	0.2,0.254	0.544,0.516	-0.303
11898	ENSMUSG00000075705.12	Msrb1	chr17	+	24741905	24741988	24741905	24741937	24742309	24742778	11898	41,52	114140	13,11	102,90	150	99	1.26236e-05	0.000662176	0.192,0.197	0.078,0.075	0.118
12051	ENSMUSG00000049606.16	Zfp644	chr5	-	106690670	106690873	106690729	106690873	106666784	106666845	12051	0,8	12,8	0,0	2,3	158	99	0.00132849	0.0294067	0.0,0.385	0.0,0.0	0.193
12156	ENSMUSG00000025150.10	Cbr2	chr11	-	120730791	120730899	120730809	120730899	120730617	120730626	12156	2,6	0,0	21,26	29,24	117	99	9.33159e-07	7.54529e-05	1.0,1.0	0.38,0.478	0.571
12302	ENSMUSG00000029152.13	Ociad1	chr5	+	73292783	73293121	73292783	73293088	73293965	73294010	12302	10,2	4,2	4,7	0,0	132	99	1.82545e-05	0.000901489	0.652,0.429	1.0,1.0	-0.46
12305	ENSMUSG00000029152.13	Ociad1	chr5	+	73292806	73293088	73292806	73292976	73293965	73294010	12305	33,57	178237	46,68	66,77	198	99	3.82812e-11	1.00403e-08	0.085,0.107	0.258,0.306	-0.186
12306	ENSMUSG00000029152.13	Ociad1	chr5	+	73292806	73293121	73292806	73292976	73293965	73294010	12306	39,57	178237	50,75	66,77	198	99	6.34093e-12	1.8496e-09	0.099,0.107	0.275,0.328	-0.198
12307	ENSMUSG00000029152.13	Ociad1	chr5	+	73292806	73293145	73292806	73292976	73293965	73294010	12307	29,56	178237	46,68	66,77	198	99	6.41021e-12	1.85249e-09	0.075,0.106	0.258,0.306	-0.192
12333	ENSMUSG00000029213.11	Commd8	chr5	-	72162142	72162286	72162158	72162286	72160961	72161063	12333	1,2	0,0	0,2	1,2	115	99	0.000863162	0.021113	1.0,1.0	0.0,0.463	0.768
12370	ENSMUSG00000106918.3	Mrpl33	chr5	+	31613938	31614224	31613938	31614090	31614602	31614621	12370	45,33	4,2	24,37	0,0	198	99	0.00192527	0.038994	0.849,0.892	1.0,1.0	-0.129
12385	ENSMUSG00000106918.3	Mrpl33	chr5	+	31614016	31614267	31614016	31614090	31614602	31614621	12385	32,47	4,2	35,41	0,0	198	99	0.00140782	0.0307053	0.8,0.922	1.0,1.0	-0.139
12396	ENSMUSG00000106918.3	Mrpl33	chr5	+	31614602	31614964	31614602	31614625	31616380	31616487	12396	5,4	2,2	0,1	1,1	198	99	0.00150034	0.0323392	0.556,0.5	0.0,0.333	0.362
12569	ENSMUSG00000054280.14	Prr14l	chr5	-	32853573	32854012	32853660	32854012	32844043	32844564	12569	0,0	4,11	2,3	3,4	186	99	0.000481546	0.013281	0.0,0.0	0.262,0.285	-0.273
12570	ENSMUSG00000054280.14	Prr14l	chr5	-	32853573	32854012	32853812	32854012	32844043	32844564	12570	0,0	1,1	2,3	0,0	198	99	5.17107e-09	7.87293e-07	0.0,0.0	1.0,1.0	-1
12636	ENSMUSG00000043510.12	Hscb	chr5	-	110835974	110836388	110836306	110836388	110834654	110834799	12636	17,33	8,9	47,65	4,4	198	99	0.000524971	0.0141615	0.515,0.647	0.855,0.89	-0.292
12663	ENSMUSG00000028959.14	Fastk	chr5	-	24444523	24444861	24444586	24444861	24443894	24444305	12663	0,0	4,3	3,1	0,0	162	99	3.26327e-10	6.83556e-08	0.0,0.0	1.0,1.0	-1
12691	ENSMUSG00000047221.5	Fam185a	chr5	+	21433690	21433783	21433690	21433781	21455781	21455877	12691	15,25	9,5	18,9	0,1	101	99	0.000123239	0.00438587	0.62,0.831	1.0,0.898	-0.224
12734	ENSMUSG00000029068.16	Ccnl2	chr4	+	155818538	155818664	155818538	155818552	155820328	155820428	12734	100177	19,36	93,91	3,2	198	99	5.46322e-08	6.43443e-06	0.725,0.711	0.939,0.958	-0.23
12735	ENSMUSG00000029068.16	Ccnl2	chr4	+	155818538	155819000	155818538	155818552	155820328	155820428	12735	92172	19,36	91,91	3,2	198	99	3.04507e-08	3.84776e-06	0.708,0.705	0.938,0.958	-0.242
12764	ENSMUSG00000026594.14	Ralgps2	chr1	-	156938725	156939134	156938973	156939134	156907638	156907778	12764	0,0	1,1	2,1	0,0	198	99	1.17288e-08	1.60556e-06	0.0,0.0	1.0,1.0	-1
12784	ENSMUSG00000109378.1	Gm49396	chr7	+	30564447	30564798	30564447	30564607	30565094	30566381	12784	196272	42,48	114,97	8,9	198	99	0.000872919	0.0212849	0.7,0.739	0.877,0.843	-0.14
12837	ENSMUSG00000001847.14	Rac1	chr5	-	143517157	143517227	143517159	143517227	143508095	143508158	12837	30,52	1,2	29,45	21,7	101	99	2.70486e-05	0.00123063	0.967,0.962	0.575,0.863	0.245
12850	ENSMUSG00000041936.18	Agrn	chr4	-	156171133	156171617	156171339	156171617	156170800	156171030	12850	1,2	2,2	4,8	0,0	198	99	3.5892e-06	0.000233868	0.2,0.333	1.0,1.0	-0.734
12892	ENSMUSG00000057367.12	Birc2	chr9	-	7836694	7836805	7836748	7836805	7834783	7835379	12892	16,21	0,4	1,0	3,2	153	99	7.33918e-07	6.10389e-05	1.0,0.773	0.177,0.0	0.798
12936	ENSMUSG00000106864.3	Gtf3c2	chr5	-	31179567	31179849	31179644	31179849	31174231	31174495	12936	2,0	4,10	1,4	1,0	176	99	5.59139e-05	0.0022842	0.22,0.0	0.36,1.0	-0.57
12937	ENSMUSG00000106864.3	Gtf3c2	chr5	-	31179567	31179909	31179883	31179909	31174231	31174495	12937	28,31	233266	29,35	70,58	198	99	4.56652e-10	9.25491e-08	0.057,0.055	0.172,0.232	-0.146
12943	ENSMUSG00000049580.12	Tsku	chr7	-	98360794	98361288	98361241	98361288	98359357	98359467	12943	21,36	27,41	15,13	0,5	198	99	0.00116195	0.0265869	0.28,0.305	1.0,0.565	-0.49
12945	ENSMUSG00000049580.12	Tsku	chr7	-	98360975	98361288	98361241	98361288	98359357	98359467	12945	21,38	27,41	15,13	0,5	198	99	0.00136585	0.0300421	0.28,0.317	1.0,0.565	-0.484
12946	ENSMUSG00000049580.12	Tsku	chr7	-	98361067	98361288	98361241	98361288	98359357	98359467	12946	21,39	27,41	15,13	0,5	198	99	0.00147657	0.031937	0.28,0.322	1.0,0.565	-0.481
13000	ENSMUSG00000026974.11	Zmynd19	chr2	+	24950209	24950612	24950209	24950474	24951472	24951532	13000	2,5	1,5	4,3	0,0	198	99	3.04053e-07	2.88444e-05	0.5,0.333	1.0,1.0	-0.584
13020	ENSMUSG00000029022.18	Miip	chr4	-	147868391	147868666	147868420	147868666	147866234	147866419	13020	3,5	2,3	11,4	0,0	128	99	5.72415e-05	0.00232341	0.537,0.563	1.0,1.0	-0.45
13071	ENSMUSG00000032498.9	Mlh1	chr9	-	111247875	111249313	111249045	111249313	111247249	111247403	13071	5,3	2,3	3,1	0,0	198	99	3.4358e-06	0.000225188	0.556,0.333	1.0,1.0	-0.555
13104	ENSMUSG00000028830.14	AU040320	chr4	+	126753552	126753864	126753552	126753767	126756898	126757068	13104	1,3	3,1	2,1	0,0	196	99	2.47856e-05	0.00115286	0.144,0.602	1.0,1.0	-0.627
13215	ENSMUSG00000012117.13	Dhdds	chr4	-	134000819	134000918	134000866	134000918	134000268	134000393	13215	2,2	13,11	3,5	0,0	146	99	4.84175e-10	9.74941e-08	0.094,0.11	1.0,1.0	-0.898
13224	ENSMUSG00000003038.15	Hmgn2	chr4	-	133966584	133966789	133966759	133966789	133966428	133966479	13224	10,12	23,26	38,37	19,12	198	99	6.28891e-07	5.36293e-05	0.179,0.188	0.5,0.607	-0.37
13260	ENSMUSG00000031885.14	Cbfb	chr8	+	105171491	105171664	105171491	105171659	105178592	105178709	13260	3,4	1,0	6,7	4,4	104	99	0.00152525	0.0326282	0.741,1.0	0.588,0.625	0.264
13298	ENSMUSG00000026035.15	Ppil3	chr1	-	58445363	58445439	58445371	58445439	58444588	58444639	13298	1,6	1,5	1,7	0,1	107	99	0.000567658	0.01513	0.481,0.526	1.0,0.866	-0.429
13311	ENSMUSG00000028909.17	Ptpru	chr4	-	131780074	131780172	131780083	131780172	131779862	131779979	13311	2,6	0,1	1,2	3,2	108	99	0.000148813	0.00513437	1.0,0.846	0.234,0.478	0.567
13483	ENSMUSG00000003873.11	Bax	chr7	-	45466499	45466775	45466767	45466775	45466219	45466271	13483	0,7	4,4	8,3	0,1	198	99	0.00011355	0.0041147	0.0,0.467	1.0,0.6	-0.567
13498	ENSMUSG00000093803.3	Ppp2r3d	chr9	-	124423233	124423583	124423509	124423583	124422622	124422828	13498	16,17	4,2	13,6	0,0	198	99	7.37031e-05	0.00286469	0.667,0.81	1.0,1.0	-0.261
13533	ENSMUSG00000000600.15	Krit1	chr5	+	3803404	3803689	3803404	3803483	3806418	3806568	13533	35,44	62,87	37,22	15,19	198	99	0.000489669	0.0134534	0.22,0.202	0.552,0.367	-0.248
13536	ENSMUSG00000000600.15	Krit1	chr5	+	3803183	3803648	3803183	3803483	3806464	3806568	13536	31,43	76,71	32,23	16,22	198	99	0.000838861	0.0206318	0.169,0.232	0.5,0.343	-0.221
13551	ENSMUSG00000054894.6	Dmac2l	chr12	+	69724961	69725018	69724961	69725014	69737950	69738061	13551	3,3	12,27	0,0	14,15	103	99	0.00230029	0.0447874	0.194,0.096	0.0,0.0	0.145
13563	ENSMUSG00000033253.18	Szt2	chr4	-	118387446	118387655	118387450	118387655	118387103	118387219	13563	2,2	27,30	5,2	1,6	103	99	0.00254764	0.0480857	0.066,0.06	0.828,0.243	-0.472
13589	ENSMUSG00000028613.15	Lrp8	chr4	+	107802867	107802997	107802867	107802924	107803250	107803370	13589	1,0	0,2	1,2	0,0	172	99	0.00182599	0.0374447	1.0,0.0	1.0,1.0	-0.5
13668	ENSMUSG00000034171.13	Faah	chr4	-	115998712	115998966	115998820	115998966	115998192	115998615	13668	1,2	18,43	3,7	19,11	198	99	0.00152428	0.0326282	0.027,0.023	0.073,0.241	-0.132
13852	ENSMUSG00000047909.11	Ankrd16	chr2	+	11779676	11780084	11779676	11779897	11781476	11783756	13852	1,1	19,29	3,4	9,6	198	99	0.0010136	0.0238938	0.026,0.017	0.143,0.25	-0.175
13856	ENSMUSG00000047909.11	Ankrd16	chr2	+	11783640	11783756	11783640	11783749	11784196	11784452	13856	9,5	3,4	0,2	5,4	106	99	0.000925671	0.0223443	0.737,0.539	0.0,0.318	0.479
14000	ENSMUSG00000003435.9	Supt5	chr7	-	28337926	28338023	28337998	28338023	28331369	28331529	14000	4,6	3,4	3,1	0,0	171	99	8.47042e-06	0.000483309	0.436,0.465	1.0,1.0	-0.549
14050	ENSMUSG00000030652.11	Coq7	chr7	-	118532892	118533297	118533061	118533297	118529558	118529737	14050	2,2	0,0	1,0	0,3	198	99	0.000246191	0.00778281	1.0,1.0	1.0,0.0	0.5
14068	ENSMUSG00000026600.12	Soat1	chr1	-	156436699	156436929	156436703	156436929	156435792	156435890	14068	1,1	0,0	4,2	5,1	103	99	7.64997e-06	0.000446286	1.0,1.0	0.435,0.658	0.454
14091	ENSMUSG00000029027.9	Dffb	chr4	-	153972607	153972940	153972779	153972940	153971580	153971660	14091	2,2	25,43	8,2	9,13	198	99	0.00165208	0.0347695	0.038,0.023	0.308,0.071	-0.159
14122	ENSMUSG00000045672.15	Col27a1	chr4	+	63293200	63293261	63293200	63293254	63293469	63293523	14122	3,8	22,55	0,0	4,6	106	99	0.00118859	0.0270584	0.113,0.12	0.0,0.0	0.116
14175	ENSMUSG00000025967.16	Eef1b2	chr1	+	63177722	63178208	63177722	63177882	63178438	63178565	14175	5,6	6,8	71,47	4,8	198	99	6.91539e-07	5.83341e-05	0.294,0.273	0.899,0.746	-0.539
14211	ENSMUSG00000035325.16	Sec31a	chr5	-	100415913	100416166	100416111	100416166	100408033	100408113	14211	20,30	4,9	16,15	0,1	198	99	0.000114132	0.00411847	0.714,0.625	1.0,0.882	-0.272
14224	ENSMUSG00000026851.9	BC005624	chr2	-	30981482	30981542	30981487	30981542	30978894	30978965	14224	21,21	2,0	13,17	10,8	104	99	3.44156e-06	0.000225188	0.909,1.0	0.553,0.669	0.344
14228	ENSMUSG00000042625.16	Safb2	chr17	-	56570933	56571319	56571204	56571319	56568990	56569022	14228	6,3	13,8	0,0	5,3	198	99	0.00027682	0.00852365	0.188,0.158	0.0,0.0	0.173
14233	ENSMUSG00000042625.16	Safb2	chr17	-	56576435	56576905	56576877	56576905	56574902	56574952	14233	55,86	6,11	65,62	1,1	198	99	5.85882e-05	0.00236558	0.821,0.796	0.97,0.969	-0.161
14234	ENSMUSG00000042625.16	Safb2	chr17	-	56576435	56576905	56576877	56576905	56575354	56576012	14234	55,87	63103	65,62	34,39	198	99	0.000714067	0.0180752	0.304,0.297	0.489,0.443	-0.165
14321	ENSMUSG00000044813.15	Shb	chr4	-	45489320	45489794	45489670	45489794	45489054	45489175	14321	40,46	4,8	4,12	0,0	198	99	0.000165263	0.00561263	0.833,0.742	1.0,1.0	-0.213
14349	ENSMUSG00000037487.7	Ubr5	chr15	-	37985871	37986199	37986078	37986199	37983946	37984190	14349	27,54	0,4	26,25	31,32	198	99	1.75415e-14	7.2038e-12	1.0,0.871	0.295,0.281	0.647
14404	ENSMUSG00000028455.15	Stoml2	chr4	-	43031223	43031358	43031279	43031358	43030970	43031108	14404	4,2	0,0	0,4	3,1	155	99	6.33988e-05	0.00253684	1.0,1.0	0.0,0.719	0.641
14443	ENSMUSG00000020949.9	Fkbp3	chr12	-	65068997	65069109	65069001	65069109	65065736	65065804	14443	32,33	0,0	21,20	8,4	103	99	7.04279e-07	5.9243e-05	1.0,1.0	0.716,0.828	0.228
14473	ENSMUSG00000070493.3	Chchd2	chr5	-	129886938	129887273	129887049	129887273	129883933	129884183	14473	3,4	2,2	0,0	1,3	198	99	1.85297e-05	0.000907899	0.429,0.5	0.0,0.0	0.465
14478	ENSMUSG00000045917.17	Tmem268	chr4	+	63560226	63560725	63560226	63560405	63560911	63560995	14478	9,7	20,25	0,0	3,1	198	99	0.000654069	0.0168712	0.184,0.123	0.0,0.0	0.153
14500	ENSMUSG00000085037.1	4933421O10Rik	chr4	-	33030856	33031323	33030913	33031323	33027141	33030521	14500	4,10	0,1	6,7	4,1	156	99	0.00255477	0.0481213	1.0,0.864	0.488,0.816	0.28
14568	ENSMUSG00000034724.18	Cnot6l	chr5	-	96161593	96161755	96161691	96161755	96134010	96134132	14568	9,9	17,20	18,19	4,2	197	99	6.40446e-08	7.46799e-06	0.21,0.184	0.693,0.827	-0.563
14569	ENSMUSG00000034724.18	Cnot6l	chr5	-	96161593	96161871	96161849	96161871	96134010	96134132	14569	0,0	8,3	11,4	6,3	198	99	2.94627e-07	2.81212e-05	0.0,0.0	0.478,0.4	-0.439
14600	ENSMUSG00000052137.11	Rbm12b2	chr4	+	12089440	12089568	12089440	12089523	12089662	12089727	14600	3,9	69,68	18,14	34,48	144	99	2.88632e-05	0.00129993	0.029,0.083	0.267,0.167	-0.161
14669	ENSMUSG00000051339.10	2900026A02Rik	chr5	-	113221206	113221236	113221210	113221236	113193760	113193907	14669	2,2	21,34	6,6	16,13	103	99	0.00129711	0.0289378	0.084,0.054	0.265,0.307	-0.217
14712	ENSMUSG00000078485.3	Plekhn1	chr4	-	156233223	156233445	156233290	156233445	156232628	156232745	14712	84135	10,17	76,50	1,1	166	99	1.44489e-05	0.000732087	0.834,0.826	0.978,0.968	-0.143
14729	ENSMUSG00000028809.16	Srrm1	chr4	-	135329003	135329490	135329372	135329490	135324818	135325280	14729	2,9	0,0	9,14	5,2	198	99	1.2319e-05	0.00065057	1.0,1.0	0.474,0.778	0.374
14792	ENSMUSG00000028256.16	Odf2l	chr3	+	145118588	145118928	145118588	145118782	145124210	145124375	14792	6,3	30,57	8,10	12,27	198	99	0.000828464	0.0204566	0.091,0.026	0.25,0.156	-0.145
14817	ENSMUSG00000022587.14	Ly6e	chr15	+	74955163	74955335	74955163	74955321	74957779	74957877	14817	2,9	1,5	9,4	0,0	113	99	5.18501e-05	0.0021406	0.637,0.612	1.0,1.0	-0.375
14818	ENSMUSG00000022587.14	Ly6e	chr15	+	74955240	74955721	74955240	74955321	74957779	74957877	14818	14,13	1,5	10,9	0,0	198	99	8.67419e-05	0.00329757	0.875,0.565	1.0,1.0	-0.28
14819	ENSMUSG00000022587.14	Ly6e	chr15	+	74955259	74955742	74955259	74955321	74957779	74957877	14819	14,14	1,5	10,8	0,0	198	99	9.4842e-05	0.0035707	0.875,0.583	1.0,1.0	-0.271
14874	ENSMUSG00000004127.12	Trmt10a	chr3	+	138143516	138143957	138143516	138143707	138147374	138147570	14874	12,7	0,6	8,5	0,0	198	99	0.00145378	0.0315098	1.0,0.368	1.0,1.0	-0.316
14889	ENSMUSG00000076432.13	Ywhaq	chr12	-	21417393	21417588	21417454	21417588	21416797	21417131	14889	28,24	16,15	31,41	6,5	160	99	0.000283825	0.00870182	0.52,0.497	0.762,0.835	-0.29
14906	ENSMUSG00000078578.9	Ube2d3	chr3	+	135438315	135438774	135438315	135438321	135439643	135439798	14906	2,6	0,0	19,18	6,6	198	99	2.54935e-05	0.00117878	1.0,1.0	0.613,0.6	0.393
14907	ENSMUSG00000078578.9	Ube2d3	chr3	+	135438315	135438780	135438315	135438321	135439643	135439798	14907	7,18	0,0	23,28	6,6	198	99	1.04312e-05	0.000562292	1.0,1.0	0.657,0.7	0.322
14908	ENSMUSG00000078578.9	Ube2d3	chr3	+	135438315	135438789	135438315	135438321	135439643	135439798	14908	5,6	0,0	18,18	6,6	198	99	1.42627e-05	0.000726189	1.0,1.0	0.6,0.6	0.4
14909	ENSMUSG00000078578.9	Ube2d3	chr3	+	135438315	135438774	135438315	135438432	135439643	135439798	14909	24,30	119126	69,47	109,83	198	99	1.5313e-06	0.000114613	0.092,0.106	0.24,0.221	-0.131
14910	ENSMUSG00000078578.9	Ube2d3	chr3	+	135438315	135438780	135438315	135438432	135439643	135439798	14910	29,42	119126	73,57	109,83	198	99	1.84658e-05	0.000906188	0.109,0.143	0.251,0.256	-0.128
14911	ENSMUSG00000078578.9	Ube2d3	chr3	+	135438315	135438789	135438315	135438432	135439643	135439798	14911	27,30	119126	68,47	109,83	198	99	5.70415e-06	0.000347041	0.102,0.106	0.238,0.221	-0.126
15012	ENSMUSG00000062006.12	Rpl34	chr3	-	130729496	130729790	130729747	130729790	130729228	130729302	15012	17,17	3,3	86,70	0,2	198	99	0.000427054	0.0120732	0.739,0.739	1.0,0.946	-0.234
15015	ENSMUSG00000062006.12	Rpl34	chr3	-	130729502	130729790	130729527	130729790	130729228	130729302	15015	11,12	9,18	150148	54,35	124	99	0.000166371	0.00563201	0.494,0.347	0.689,0.771	-0.309
15016	ENSMUSG00000062006.12	Rpl34	chr3	-	130729502	130729790	130729747	130729790	130729228	130729302	15016	28,29	3,3	235218	0,2	198	99	0.000242256	0.00769965	0.824,0.829	1.0,0.982	-0.164
15019	ENSMUSG00000062006.12	Rpl34	chr3	-	130729524	130729790	130729747	130729790	130729228	130729302	15019	17,18	3,3	85,70	0,2	198	99	0.000485389	0.0133711	0.739,0.75	1.0,0.946	-0.229
15021	ENSMUSG00000062006.12	Rpl34	chr3	-	130729527	130729790	130729747	130729790	130729228	130729302	15021	26,35	3,3	139105	0,2	198	99	0.000955354	0.0229189	0.812,0.854	1.0,0.963	-0.149
15059	ENSMUSG00000029247.17	Paics	chr5	+	76951347	76951668	76951347	76951405	76951768	76951835	15059	16,27	14,24	26,19	3,7	198	99	0.00249423	0.0474036	0.364,0.36	0.812,0.576	-0.332
15073	ENSMUSG00000070737.10	Tmem35b	chr4	+	127126045	127126193	127126045	127126100	127127818	127127999	15073	31,52	6,5	47,62	0,2	192	99	0.000427823	0.012084	0.727,0.843	1.0,0.941	-0.185
15190	ENSMUSG00000027957.13	Slc35a3	chr3	-	116712082	116712650	116712616	116712650	116694429	116694634	15190	118125	2,2	79,84	1,14	198	99	0.00225328	0.0440645	0.967,0.969	0.975,0.75	0.105
15263	ENSMUSG00000051674.15	Dcun1d4	chr5	+	73520914	73521083	73520914	73521044	73522652	73522744	15263	1,5	3,17	0,0	6,7	138	99	0.00143429	0.0311739	0.193,0.174	0.0,0.0	0.183
15339	ENSMUSG00000046434.16	Hnrnpa1	chr15	+	103243926	103244308	103243926	103244028	103246345	103246421	15339	6671023	381579	1103983	17781456	198	99	0	0	0.467,0.469	0.237,0.252	0.223
15341	ENSMUSG00000046434.16	Hnrnpa1	chr15	+	103245634	103245966	103245634	103245794	103246345	103246421	15341	9,10	5,6	4,2	0,0	198	99	4.98127e-06	0.000307254	0.474,0.455	1.0,1.0	-0.535
15460	ENSMUSG00000006304.14	Arpc2	chr1	+	74236817	74237314	74236817	74237047	74246079	74246114	15460	6,7	10,4	0,0	4,1	198	99	3.73623e-05	0.00160843	0.231,0.467	0.0,0.0	0.349
15476	ENSMUSG00000029920.9	Smarcad1	chr6	+	65042620	65043104	65042620	65042730	65043205	65043561	15476	18,19	127214	23,20	71,34	198	99	2.20262e-06	0.000154107	0.066,0.043	0.139,0.227	-0.129
15602	ENSMUSG00000025337.10	Sbds	chr5	-	130248108	130248450	130248260	130248450	130246404	130246461	15602	1,1	1,2	2,2	1,0	198	99	0.000822472	0.0203893	0.333,0.2	0.5,1.0	-0.483
15606	ENSMUSG00000025337.10	Sbds	chr5	-	130255089	130255310	130255209	130255310	130253938	130254009	15606	57,61	21,35	54,48	2,6	198	99	2.57665e-06	0.000175038	0.576,0.466	0.931,0.8	-0.345
15607	ENSMUSG00000025337.10	Sbds	chr5	-	130255089	130255405	130255143	130255405	130253938	130254009	15607	2,1	1,0	0,2	1,3	153	99	0.000777676	0.0194176	0.564,1.0	0.0,0.301	0.632
15693	ENSMUSG00000005968.14	Tuft1	chr3	-	94622393	94622805	94622681	94622805	94622050	94622145	15693	0,0	4,2	5,1	0,0	198	99	4.46146e-11	1.16039e-08	0.0,0.0	1.0,1.0	-1
15705	ENSMUSG00000072889.9	Nfxl1	chr5	-	72559365	72559684	72559658	72559684	72559013	72559268	15705	2,3	2,7	0,0	3,1	198	99	0.00199964	0.0400968	0.333,0.176	0.0,0.0	0.255
15752	ENSMUSG00000028494.12	Plin2	chr4	-	86669533	86669986	86669870	86669986	86668649	86668705	15752	4,8	12,18	0,1	10,11	198	99	0.000290084	0.00882437	0.143,0.182	0.0,0.043	0.141
15799	ENSMUSG00000046259.2	Sprr2h	chr3	+	92386612	92386681	92386612	92386679	92386895	92387100	15799	0,1	13,22	3,9	23,11	101	99	0.000121956	0.00435012	0.0,0.043	0.113,0.445	-0.258
15813	ENSMUSG00000118124.1	AC129217.1	chr19	+	8831224	8831525	8831224	8831332	8839575	8839784	15813	5,4	3,4	2,1	0,0	198	99	3.36058e-07	3.16879e-05	0.455,0.333	1.0,1.0	-0.606
15826	ENSMUSG00000036427.5	Gpi1	chr7	-	34215881	34216009	34215886	34216009	34208249	34208310	15826	0,0	2,1	2,3	3,2	104	99	2.64763e-05	0.00121166	0.0,0.0	0.388,0.588	-0.488
15832	ENSMUSG00000036427.5	Gpi1	chr7	-	34229539	34229794	34229773	34229794	34229282	34229373	15832	25,22	5,8	336289	2,4	198	99	4.8841e-10	9.77165e-08	0.714,0.579	0.988,0.973	-0.334
15892	ENSMUSG00000060671.12	Atp8b2	chr3	-	89958015	89958387	89958288	89958387	89957297	89957368	15892	7,7	0,2	3,6	18,12	198	99	8.84902e-06	0.000501247	1.0,0.636	0.077,0.2	0.679
15936	ENSMUSG00000031851.14	Ntpcr	chr8	+	125736067	125736230	125736067	125736225	125737322	125737419	15936	180246	33,48	160144	47,58	104	99	0.00186422	0.0380288	0.839,0.83	0.764,0.703	0.101
15992	ENSMUSG00000030309.16	Caprin2	chr6	-	148848105	148848285	148848259	148848285	148846152	148846253	15992	48,78	0,0	22,13	0,5	198	99	0.00248473	0.0473161	1.0,1.0	1.0,0.565	0.218
16010	ENSMUSG00000041736.7	Tspo	chr15	+	83564186	83564628	83564186	83564353	83571384	83571595	16010	0,1	3,2	4,1	2,0	198	99	0.00107221	0.0248588	0.0,0.2	0.5,1.0	-0.65
16019	ENSMUSG00000028439.14	Fam219a	chr4	-	41524314	41524414	41524365	41524414	41521866	41521969	16019	2,2	3,0	0,0	2,2	150	99	0.00104173	0.0244279	0.306,1.0	0.0,0.0	0.653
16031	ENSMUSG00000029012.11	Orc5	chr5	-	22549930	22550304	22550278	22550304	22547923	22548016	16031	0,4	3,2	9,2	0,1	198	99	0.000235995	0.00753903	0.0,0.5	1.0,0.5	-0.5
16043	ENSMUSG00000028081.6	Rps3a1	chr3	-	86142215	86142702	86142457	86142702	86141697	86141801	16043	2,3	0,0	1,0	0,2	198	99	0.00119564	0.0271003	1.0,1.0	1.0,0.0	0.5
16048	ENSMUSG00000028081.6	Rps3a1	chr3	-	86142244	86142702	86142422	86142702	86141697	86141801	16048	5,22	3,3	2,4	0,0	198	99	7.124e-05	0.0027863	0.455,0.786	1.0,1.0	-0.379
16051	ENSMUSG00000028081.6	Rps3a1	chr3	-	86142244	86142702	86142509	86142702	86141697	86141801	16051	5,22	9,18	2,4	37,35	198	99	3.00475e-07	2.85919e-05	0.217,0.379	0.026,0.054	0.258
16053	ENSMUSG00000028081.6	Rps3a1	chr3	-	86142371	86142702	86142422	86142702	86141697	86141801	16053	11,14	3,3	1,2	0,0	150	99	0.000437387	0.01231	0.708,0.755	1.0,1.0	-0.268
16056	ENSMUSG00000028081.6	Rps3a1	chr3	-	86142371	86142702	86142509	86142702	86141697	86141801	16056	11,14	9,18	1,2	37,35	198	99	4.53892e-10	9.25491e-08	0.379,0.28	0.013,0.028	0.309
16057	ENSMUSG00000028081.6	Rps3a1	chr3	-	86142371	86142702	86142535	86142702	86141697	86141801	16057	11,14	6,17	1,2	8,8	198	99	0.000978762	0.0233548	0.478,0.292	0.059,0.111	0.3
16060	ENSMUSG00000028081.6	Rps3a1	chr3	-	86142422	86142702	86142509	86142702	86141697	86141801	16060	3,3	9,18	0,0	37,35	186	99	0.00243113	0.046541	0.151,0.081	0.0,0.0	0.116
16067	ENSMUSG00000028081.6	Rps3a1	chr3	-	86142509	86142702	86142535	86142702	86141697	86141801	16067	9,18	6,17	37,35	8,8	125	99	0.000794271	0.0198161	0.543,0.456	0.786,0.776	-0.281
16106	ENSMUSG00000022673.5	Mcm4	chr16	-	15635048	15635323	15635229	15635323	15634438	15634577	16106	711915	1,8	499373	57,60	198	99	0	0	0.997,0.983	0.814,0.757	0.205
16127	ENSMUSG00000035545.13	Leng8	chr7	+	4142833	4143309	4142833	4143037	4143418	4143697	16127	28,63	66,94	63,61	23,13	198	99	1.52309e-11	4.13367e-09	0.175,0.251	0.578,0.701	-0.426
16221	ENSMUSG00000025950.16	Idh1	chr1	-	65186208	65186459	65186396	65186459	65181627	65181698	16221	9,2	3,3	2,1	0,0	198	99	1.79529e-06	0.000130612	0.6,0.25	1.0,1.0	-0.575
16222	ENSMUSG00000025950.16	Idh1	chr1	-	65186304	65186479	65186396	65186479	65181627	65181698	16222	13,29	3,3	10,12	0,0	191	99	0.000170603	0.00575642	0.692,0.834	1.0,1.0	-0.237
16273	ENSMUSG00000115423.2	AL731706.1	chr2	-	136891042	136891389	136891278	136891389	136885472	136885700	16273	284392	64,82	221178	9,12	198	99	9.54929e-10	1.77407e-07	0.689,0.705	0.925,0.881	-0.206
16285	ENSMUSG00000028619.15	Tceanc2	chr4	-	107178896	107179103	107178911	107179103	107177564	107177704	16285	4,1	5,13	1,2	0,0	114	99	1.25647e-07	1.35226e-05	0.41,0.063	1.0,1.0	-0.764
16350	ENSMUSG00000028389.12	Zfp37	chr4	-	62208189	62208446	62208319	62208446	62205023	62205108	16350	7,5	0,2	5,3	5,7	198	99	0.0020408	0.0406481	1.0,0.556	0.333,0.176	0.524
16370	ENSMUSG00000020646.17	Mboat2	chr12	+	24830878	24830985	24830878	24830969	24878190	24878336	16370	4,5	0,1	2,2	2,2	115	99	0.000724363	0.0183202	1.0,0.811	0.463,0.463	0.442
16373	ENSMUSG00000002910.11	Arrdc2	chr8	-	70839503	70839660	70839607	70839660	70838978	70839045	16373	1,2	0,0	8,11	4,3	198	99	6.41402e-06	0.000384977	1.0,1.0	0.5,0.647	0.426
16390	ENSMUSG00000073422.11	H2-Ke6	chr17	-	34026662	34026903	34026850	34026903	34026032	34026225	16390	12,14	1,0	13,12	2,5	198	99	0.000648829	0.0167638	0.857,1.0	0.765,0.545	0.273
16440	ENSMUSG00000031904.5	Slc7a6	chr8	+	106168856	106169134	106168856	106168933	106179101	106179660	16440	3,3	4,2	2,4	0,0	198	99	1.39101e-07	1.46177e-05	0.273,0.429	1.0,1.0	-0.649
16451	ENSMUSG00000031904.5	Slc7a6	chr8	+	106169104	106169222	106169104	106169136	106179101	106179660	16451	12,13	26,46	10,4	1,3	185	99	0.00183884	0.0376095	0.198,0.131	0.843,0.416	-0.465
16452	ENSMUSG00000031904.5	Slc7a6	chr8	+	106169104	106169256	106169104	106169136	106179101	106179660	16452	12,13	26,46	10,5	1,3	198	99	0.000595864	0.0156941	0.188,0.124	0.833,0.455	-0.488
16453	ENSMUSG00000031904.5	Slc7a6	chr8	+	106169104	106169563	106169104	106169136	106179101	106179660	16453	11,14	26,46	10,4	1,3	198	99	0.00213399	0.0421544	0.175,0.132	0.833,0.4	-0.463
16518	ENSMUSG00000039262.16	Prrc2b	chr2	+	32212886	32214947	32212886	32213079	32216045	32216233	16518	130215	2,4	48,67	9,4	198	99	0.000245533	0.00778281	0.97,0.964	0.727,0.893	0.157
16567	ENSMUSG00000059851.15	Kmt5c	chr7	+	4742121	4742529	4742121	4742287	4742618	4742728	16567	9,35	85162	64,53	34,25	198	99	0	0	0.05,0.097	0.485,0.515	-0.426
16638	ENSMUSG00000028044.6	Cks1b	chr3	-	89417721	89418219	89418108	89418219	89416273	89416401	16638	2,1	1,6	1,1	0,0	198	99	7.24237e-09	1.06623e-06	0.5,0.077	1.0,1.0	-0.712
16650	ENSMUSG00000040265.16	Dnm3	chr1	-	162273603	162273649	162273619	162273649	162231653	162231767	16650	5,5	7,4	1,1	0,0	115	99	2.4796e-06	0.000170464	0.381,0.518	1.0,1.0	-0.55
16665	ENSMUSG00000027715.9	Ccna2	chr3	-	36568587	36569053	36568979	36569053	36566999	36567113	16665	48,69	2,5	54,58	0,0	198	99	0.00127293	0.0284799	0.923,0.873	1.0,1.0	-0.102
16723	ENSMUSG00000029817.11	Tra2a	chr6	-	49252796	49253108	49253029	49253108	49252381	49252515	16723	18,29	7,8	34,34	0,2	198	99	9.12902e-06	0.000509706	0.563,0.644	1.0,0.895	-0.344
16725	ENSMUSG00000029817.11	Tra2a	chr6	-	49252802	49253108	49253029	49253108	49252381	49252515	16725	3,0	7,8	5,5	0,2	198	99	4.58381e-05	0.00192551	0.176,0.0	1.0,0.556	-0.69
16726	ENSMUSG00000029817.11	Tra2a	chr6	-	49252807	49253108	49253029	49253108	49252381	49252515	16726	8,5	7,8	22,15	0,2	198	99	5.74369e-07	4.93847e-05	0.364,0.238	1.0,0.789	-0.594
16732	ENSMUSG00000027663.12	Zmat3	chr3	-	32365165	32365460	32365343	32365460	32361071	32361216	16732	26,39	1,2	9,8	7,5	198	99	2.04723e-06	0.000145549	0.929,0.907	0.391,0.444	0.501
16786	ENSMUSG00000018572.10	Phf23	chr11	+	69996990	69997061	69996990	69997059	69997596	69997628	16786	10,7	6,13	0,0	4,2	101	99	8.43852e-06	0.000483256	0.62,0.345	0.0,0.0	0.482
16787	ENSMUSG00000018572.10	Phf23	chr11	+	69996990	69997290	69996990	69997059	69997596	69997628	16787	10,5	6,13	0,0	4,2	198	99	5.6919e-05	0.00231919	0.455,0.161	0.0,0.0	0.308
16790	ENSMUSG00000026767.12	Mindy3	chr2	-	12350799	12350992	12350928	12350992	12349706	12349842	16790	6,8	0,0	3,3	6,1	198	99	1.33726e-07	1.41963e-05	1.0,1.0	0.2,0.6	0.6
16812	ENSMUSG00000039058.11	Ak5	chr3	-	152472736	152472948	152472756	152472948	152463862	152464021	16812	4,1	0,0	7,7	5,1	119	99	0.000109533	0.00400309	1.0,1.0	0.538,0.853	0.304
16834	ENSMUSG00000074305.9	Peak1	chr9	-	56417860	56418067	56417940	56418067	56318662	56318820	16834	5,5	11,16	0,0	5,7	179	99	0.000180253	0.00603634	0.201,0.147	0.0,0.0	0.174
16842	ENSMUSG00000002602.16	Axl	chr7	-	25773098	25773405	25773342	25773405	25770632	25770765	16842	523832	180290	687543	111100	198	99	2.07983e-07	2.07217e-05	0.592,0.589	0.756,0.731	-0.153
16856	ENSMUSG00000035314.10	Gdpd5	chr7	+	99438247	99438744	99438247	99438351	99441171	99441265	16856	4,7	96134	13,4	11,11	198	99	1.65743e-07	1.72433e-05	0.02,0.025	0.371,0.154	-0.24
16960	ENSMUSG00000027424.11	Mgme1	chr2	+	144270899	144271072	144270899	144270947	144271914	144272484	16960	33,56	30,36	10,12	26,21	198	99	0.000594083	0.0156604	0.355,0.438	0.161,0.222	0.205
16971	ENSMUSG00000051469.14	Zfp24	chr18	-	24019831	24020370	24020229	24020370	24017970	24018168	16971	30,57	0,0	3,5	1,2	198	99	0.000881431	0.0214589	1.0,1.0	0.6,0.556	0.422
16976	ENSMUSG00000040390.13	Map3k10	chr7	-	27661381	27661651	27661534	27661651	27659020	27659174	16976	0,0	65,84	7,3	11,10	198	99	2.13586e-07	2.11627e-05	0.0,0.0	0.241,0.13	-0.185
17030	ENSMUSG00000025702.15	2022-03-08	chr6	+	116338023	116338486	116338023	116338215	116392523	116392574	17030	37,11	3,3	9,19	0,0	198	99	0.000199491	0.00652654	0.86,0.647	1.0,1.0	-0.246
17083	ENSMUSG00000046688.14	Tifa	chr3	+	127790654	127790929	127790654	127790724	127791472	127791529	17083	0,6	4,4	0,0	1,2	198	99	0.00254179	0.0480508	0.0,0.429	0.0,0.0	0.214
17110	ENSMUSG00000026743.16	Mllt10	chr2	+	18065034	18065513	18065034	18065194	18071124	18071204	17110	17,13	102201	61,54	80,94	198	99	1.11022e-16	5.41425e-14	0.077,0.031	0.276,0.223	-0.196
17131	ENSMUSG00000029056.13	Pank4	chr4	+	154964122	154964469	154964122	154964432	154969129	154969212	17131	1,4	0,0	0,1	1,1	136	99	0.000883703	0.0214677	1.0,1.0	0.0,0.421	0.789
17147	ENSMUSG00000042626.13	Shc1	chr3	+	89421641	89421748	89421641	89421721	89422177	89422345	17147	12,18	0,9	4,8	0,0	126	99	0.000488617	0.0134363	1.0,0.611	1.0,1.0	-0.195
17211	ENSMUSG00000038733.14	Wdr26	chr1	-	181209005	181209107	181209050	181209107	181203023	181203160	17211	120174	211339	65,58	228232	144	99	9.05322e-06	0.000508201	0.281,0.261	0.164,0.147	0.116
17297	ENSMUSG00000062169.13	Cnih4	chr1	+	181151462	181151529	181151462	181151520	181155858	181155971	17297	0,1	1,1	1,3	1,1	108	99	0.00177772	0.0367935	0.0,0.478	0.478,0.733	-0.366
17320	ENSMUSG00000049401.10	Ogfr	chr2	+	180592598	180592996	180592598	180592784	180593103	180593170	17320	0,0	5,10	3,4	4,5	198	99	8.20132e-05	0.00314075	0.0,0.0	0.273,0.286	-0.279
17334	ENSMUSG00000040843.10	Tiprl	chr1	-	165236666	165236932	165236671	165236932	165228363	165228447	17334	0,0	2,4	4,2	12,12	104	99	0.000636354	0.0165098	0.0,0.0	0.241,0.137	-0.189
17388	ENSMUSG00000023348.11	Trip6	chr5	-	137310600	137310831	137310732	137310831	137310284	137310405	17388	1,8	0,1	0,2	5,1	198	99	9.77919e-06	0.000534533	1.0,0.8	0.0,0.5	0.65
17394	ENSMUSG00000052423.14	B4galt3	chr1	+	171270664	171271105	171270664	171270689	171271202	171271373	17394	17,26	0,1	24,39	3,5	198	99	0.00151388	0.0324812	1.0,0.929	0.8,0.796	0.166
17513	ENSMUSG00000024542.9	Cep192	chr18	+	67828350	67828526	67828350	67828477	67829832	67830293	17513	1,0	0,4	1,2	1,0	148	99	0.00120208	0.0271674	1.0,0.0	0.401,1.0	-0.201
17525	ENSMUSG00000028261.13	Ndufaf4	chr4	+	24901693	24902000	24901693	24901781	24903131	24903485	17525	5,6	0,0	4,2	1,5	198	99	1.35669e-06	0.000102776	1.0,1.0	0.667,0.167	0.583
17577	ENSMUSG00000028702.15	Rad54l	chr4	-	116123478	116123685	116123500	116123685	116123061	116123148	17577	15,25	6,10	6,4	0,0	121	99	2.53581e-05	0.00117426	0.672,0.672	1.0,1.0	-0.328
17619	ENSMUSG00000039801.7	Cplane1	chr15	+	8169105	8169489	8169105	8169462	8170305	8170394	17619	63,74	3,4	38,42	10,6	126	99	0.00242522	0.046472	0.943,0.936	0.749,0.846	0.142
17626	ENSMUSG00000039801.7	Cplane1	chr15	+	8178336	8178448	8178336	8178443	8179757	8179914	17626	11,11	48,94	27,19	48,51	104	99	0.00036372	0.0106893	0.179,0.1	0.349,0.262	-0.166
17686	ENSMUSG00000023892.8	Zfp51	chr17	+	21450373	21450707	21450373	21450407	21452436	21452527	17686	2,8	8,16	0,0	6,5	198	99	0.000197609	0.00647853	0.111,0.2	0.0,0.0	0.155
17699	ENSMUSG00000027405.16	Nop56	chr2	+	130277035	130277373	130277035	130277314	130277475	130277624	17699	113135	8661171	44,38	64,40	158	99	0	0	0.076,0.067	0.301,0.373	-0.265
17718	ENSMUSG00000039087.17	Rreb1	chr13	+	37825974	37826348	37825974	37826052	37888870	37888972	17718	2,0	13,8	8,5	6,0	198	99	4.57143e-05	0.00192549	0.071,0.0	0.4,1.0	-0.664
17760	ENSMUSG00000029647.15	Pan3	chr5	+	147545605	147546016	147545605	147545735	147546364	147548502	17760	117191	150245	106,92	13,35	198	99	7.81638e-08	8.93615e-06	0.281,0.28	0.803,0.568	-0.405
17811	ENSMUSG00000079164.8	Tlr5	chr1	+	182954787	182954882	182954787	182954841	182969013	182969141	17811	2,4	4,1	1,0	4,2	140	99	0.0013397	0.029592	0.261,0.739	0.15,0.0	0.425
17824	ENSMUSG00000022179.5	4931414P19Rik	chr14	-	54605802	54605993	54605849	54605993	54595113	54595951	17824	36,54	5,2	11,15	0,0	146	99	0.00182197	0.0373868	0.83,0.948	1.0,1.0	-0.111
17896	ENSMUSG00000032553.14	Srprb	chr9	-	103198781	103198866	103198788	103198866	103192212	103192349	17896	8,8	0,0	6,4	7,3	106	99	2.32677e-07	2.28367e-05	1.0,1.0	0.445,0.555	0.5
17917	ENSMUSG00000033964.12	Zbtb41	chr1	+	139422287	139422326	139422287	139422317	139423033	139424267	17917	91,77	18,22	44,52	5,0	108	99	0.000114142	0.00411847	0.823,0.762	0.89,1.0	-0.153
17920	ENSMUSG00000033964.12	Zbtb41	chr1	+	139422381	139422595	139422381	139422423	139423033	139424267	17920	35,28	32,47	9,6	33,19	198	99	0.00244763	0.0467808	0.354,0.23	0.12,0.136	0.164
17959	ENSMUSG00000016481.15	Cr1l	chr1	-	195131187	195131534	195131364	195131534	195129829	195130009	17959	217356	33,47	127100	3,3	198	99	6.66289e-07	5.65096e-05	0.767,0.791	0.955,0.943	-0.17
17999	ENSMUSG00000030924.16	Rexo5	chr7	+	119794118	119794593	119794118	119794502	119805142	119805286	17999	1,0	9,12	2,5	9,8	190	99	0.00138886	0.0303768	0.055,0.0	0.104,0.246	-0.147
18051	ENSMUSG00000024454.16	Hdac3	chr18	-	37954404	37954764	37954621	37954764	37952595	37952613	18051	4,8	5,1	1,0	3,1	198	99	0.000579292	0.0153483	0.286,0.8	0.143,0.0	0.472
18082	ENSMUSG00000062580.9	Timm17a	chr1	-	135313554	135313691	135313582	135313691	135309770	135309870	18082	2,3	1,1	0,0	1,1	127	99	9.67667e-06	0.000530788	0.609,0.7	0.0,0.0	0.654
18089	ENSMUSG00000021413.9	Prpf4b	chr13	+	34899108	34899362	34899108	34899223	34899830	34899982	18089	14,26	179274	16,26	53,49	198	99	3.0593e-08	3.85016e-06	0.038,0.045	0.131,0.21	-0.129
18090	ENSMUSG00000021413.9	Prpf4b	chr13	+	34899200	34899455	34899200	34899223	34899830	34899982	18090	30,45	179274	40,48	53,49	198	99	1.93179e-14	7.83026e-12	0.077,0.076	0.274,0.329	-0.225
18114	ENSMUSG00000045319.13	Proser2	chr2	-	6129627	6129917	6129895	6129917	6113892	6114113	18114	67112	22,62	167114	17,20	198	99	9.8452e-06	0.000536889	0.604,0.475	0.831,0.74	-0.246
18121	ENSMUSG00000075000.11	Nrbf2	chr10	-	67271221	67271446	67271399	67271446	67270105	67270146	18121	21,15	0,0	7,10	7,0	198	99	0.00101496	0.023908	1.0,1.0	0.333,1.0	0.334
18142	ENSMUSG00000042202.15	Slc35e2	chr4	+	155601610	155601802	155601610	155601641	155609838	155610319	18142	0,0	1,2	1,2	0,0	198	99	3.9232e-09	6.21558e-07	0.0,0.0	1.0,1.0	-1
18154	ENSMUSG00000026626.11	Ppp2r5a	chr1	-	191372530	191372666	191372535	191372666	191368640	191368742	18154	7,5	0,0	4,1	2,3	104	99	1.98075e-05	0.000956985	1.0,1.0	0.656,0.241	0.551
18217	ENSMUSG00000035629.19	Rubcn	chr16	-	32861472	32861613	32861539	32861613	32856891	32857045	18217	2,3	0,0	4,0	1,4	166	99	4.83991e-06	0.000302052	1.0,1.0	0.705,0.0	0.647
18288	ENSMUSG00000078812.10	Eif5a	chr11	-	69920780	69921190	69921162	69921190	69920340	69920422	18288	28,32	4,9	32,18	0,2	198	99	0.00130726	0.029102	0.778,0.64	1.0,0.818	-0.2
18291	ENSMUSG00000078812.10	Eif5a	chr11	-	69920805	69921190	69921162	69921190	69920340	69920422	18291	28,30	4,9	34,18	0,2	198	99	0.00100846	0.0238086	0.778,0.625	1.0,0.818	-0.208
18292	ENSMUSG00000078812.10	Eif5a	chr11	-	69921023	69921316	69921162	69921316	69920340	69920422	18292	29,31	4,9	36,18	0,2	198	99	0.000994258	0.0235983	0.784,0.633	1.0,0.818	-0.201
18348	ENSMUSG00000002778.14	Kdelr1	chr7	+	45872771	45873261	45872771	45873235	45873758	45873859	18348	1,12	3,0	0,1	1,1	125	99	0.00161539	0.0342281	0.209,1.0	0.0,0.442	0.384
18358	ENSMUSG00000019088.13	Dnase1l1	chrX	-	74276645	74277090	74277038	74277090	74274367	74274468	18358	1,1	3,13	6,4	2,2	198	99	2.42123e-05	0.00113432	0.143,0.037	0.6,0.5	-0.46
18377	ENSMUSG00000026615.14	Eprs	chr1	+	185387058	185387298	185387058	185387118	185396029	185396166	18377	24,22	5,5	32,24	1,0	198	99	2.94898e-05	0.00132242	0.706,0.688	0.941,1.0	-0.273
18397	ENSMUSG00000026281.15	Dtymk	chr1	-	93800742	93800906	93800801	93800906	93798379	93798470	18397	73,63	273442	57,49	102103	158	99	9.61715e-08	1.06819e-05	0.144,0.082	0.259,0.23	-0.132
18398	ENSMUSG00000026281.15	Dtymk	chr1	-	93800775	93800906	93800801	93800906	93798379	93798470	18398	73,63	273442	57,48	102103	125	99	2.7181e-07	2.61835e-05	0.175,0.101	0.307,0.27	-0.15
18497	ENSMUSG00000028995.14	Fam126a	chr5	-	24029655	24030040	24029913	24030040	23999940	24000019	18497	12,14	27,21	48,19	6,9	198	99	1.56688e-05	0.000786235	0.182,0.25	0.8,0.514	-0.441
18529	ENSMUSG00000005718.8	Tfap4	chr16	-	4558586	4558783	4558664	4558783	4551934	4552100	18529	8,13	4,3	3,1	0,0	177	99	1.34123e-05	0.000693063	0.528,0.708	1.0,1.0	-0.382
18548	ENSMUSG00000079658.9	Eloc	chr1	-	16656861	16657018	16656911	16657018	16647954	16648007	18548	40,46	99121	70,60	73,52	149	99	1.15737e-06	9.16819e-05	0.212,0.202	0.389,0.434	-0.204
18560	ENSMUSG00000029521.7	Chek2	chr5	+	110839982	110840431	110839982	110840048	110841205	110841543	18560	14,25	99141	18,10	26,29	198	99	0.000776016	0.0193917	0.066,0.081	0.257,0.147	-0.129
18636	ENSMUSG00000034595.17	Ppp1r18	chr17	+	35865592	35865900	35865592	35865694	35867229	35868785	18636	1,0	6,1	1,4	1,1	198	99	0.000468797	0.0130059	0.077,0.0	0.333,0.667	-0.462
18658	ENSMUSG00000029071.16	Dvl1	chr4	+	155855280	155855544	155855280	155855339	155856131	155856232	18658	39,47	0,14	14,13	0,0	198	99	0.00040476	0.0116112	1.0,0.627	1.0,1.0	-0.186
18690	ENSMUSG00000038523.10	1700003F12Rik	chr2	+	154549296	154549395	154549296	154549366	154549539	154550003	18690	14,36	0,1	27,23	3,5	128	99	0.00064033	0.0165991	1.0,0.965	0.874,0.781	0.155
18754	ENSMUSG00000026718.17	Stam	chr2	+	14115816	14116052	14115816	14115892	14117388	14117535	18754	0,1	9,15	3,4	6,8	198	99	0.0006737	0.0172776	0.0,0.032	0.2,0.2	-0.184
18758	ENSMUSG00000002307.16	Daxx	chr17	+	33909444	33909598	33909444	33909493	33910430	33910671	18758	225334	6,7	192160	22,22	198	99	2.79403e-08	3.58866e-06	0.949,0.96	0.814,0.784	0.155
18764	ENSMUSG00000039128.13	Cdc123	chr2	-	5795531	5795686	5795543	5795686	5794664	5794880	18764	2,1	0,0	0,0	1,1	111	99	1.16384e-08	1.6002e-06	1.0,1.0	0.0,0.0	1
18811	ENSMUSG00000021546.18	Hnrnpk	chr13	-	58401792	58402273	58401859	58402273	58400332	58400417	18811	28,15	4,5	31,21	1,0	166	99	0.000116306	0.00417725	0.807,0.641	0.949,1.0	-0.25
18849	ENSMUSG00000033852.16	Gm28042	chr2	+	120030815	120030918	120030815	120030876	120031306	120031402	18849	3,2	0,1	1,2	3,2	141	99	0.000532249	0.0143331	1.0,0.584	0.19,0.413	0.491
18859	ENSMUSG00000026107.11	Nabp1	chr1	-	51478003	51478399	51478300	51478399	51477477	51477616	18859	221292	17,22	145159	2,2	198	99	7.80226e-06	0.000452632	0.867,0.869	0.973,0.975	-0.106
18860	ENSMUSG00000026107.11	Nabp1	chr1	-	51478003	51478399	51478371	51478399	51477477	51477616	18860	115118	10,15	61,78	2,2	198	99	0.00161536	0.0342281	0.852,0.797	0.938,0.951	-0.12
18887	ENSMUSG00000075225.14	Ccdc162	chr10	-	41553403	41553568	41553415	41553568	41553072	41553207	18887	1,4	3,8	0,0	4,2	111	99	0.000725041	0.0183202	0.229,0.308	0.0,0.0	0.269
18901	ENSMUSG00000044037.15	Als2cl	chr9	+	110880173	110880500	110880173	110880229	110882713	110882823	18901	14,4	30,62	32,27	35,41	198	99	7.90808e-05	0.00304715	0.189,0.031	0.314,0.248	-0.171
18922	ENSMUSG00000044037.15	Als2cl	chr9	+	110890084	110890212	110890084	110890179	110890300	110890462	18922	1,9	11,16	1,0	11,4	132	99	0.00166273	0.0349229	0.064,0.297	0.064,0.0	0.148
18955	ENSMUSG00000018501.17	Ncor1	chr11	-	62403280	62403462	62403435	62403462	62401200	62401267	18955	27,56	58,80	181152	34,31	198	99	0	0	0.189,0.259	0.727,0.71	-0.494
18969	ENSMUSG00000046671.18	Mtfr1l	chr4	-	134535004	134535268	134535081	134535268	134532626	134532752	18969	7,2	63,71	14,7	26,26	176	99	2.2996e-05	0.00108747	0.059,0.016	0.232,0.132	-0.144
18986	ENSMUSG00000059995.12	Atxn7l3	chr11	-	102294074	102294163	102294076	102294163	102293843	102293941	18986	2,2	0,5	0,0	2,2	101	99	0.000605332	0.0158827	1.0,0.282	0.0,0.0	0.641
18998	ENSMUSG00000029328.15	Hnrnpdl	chr5	-	100038390	100038869	100038719	100038869	100037812	100037981	18998	236393	16212238	738592	13561130	198	99	0	0	0.068,0.081	0.214,0.208	-0.136
19001	ENSMUSG00000027198.16	Ext2	chr2	-	93820029	93820149	93820034	93820149	93813952	93813964	19001	5,5	6,13	3,4	0,0	104	99	3.37637e-07	3.1741e-05	0.442,0.268	1.0,1.0	-0.645
19042	ENSMUSG00000006494.11	Pdk1	chr2	+	71887381	71887817	71887381	71887556	71888895	71888994	19042	3,1	4,1	1,7	1,0	198	99	0.00200779	0.0401958	0.273,0.333	0.333,1.0	-0.363
19057	ENSMUSG00000057133.14	Chd6	chr2	-	161059699	161059806	161059790	161059806	161052387	161052905	19057	6,1	5,10	0,0	1,1	190	99	0.00100821	0.0238086	0.385,0.05	0.0,0.0	0.217
19074	ENSMUSG00000029283.17	Cdc7	chr5	+	106974600	106974974	106974600	106974696	106975484	106975660	19074	17,34	95115	15,7	14,13	198	99	0.00240659	0.0462374	0.082,0.129	0.349,0.212	-0.175
19163	ENSMUSG00000028541.14	B4galt2	chr4	-	117877086	117877534	117877438	117877534	117876879	117876984	19163	5,9	3,3	9,9	0,0	198	99	4.72258e-06	0.000295976	0.455,0.6	1.0,1.0	-0.473
19175	ENSMUSG00000031533.4	Mrps31	chr8	+	22424346	22424509	22424346	22424420	22429180	22429665	19175	0,1	2,5	3,2	0,0	188	99	4.73992e-11	1.22263e-08	0.0,0.095	1.0,1.0	-0.953
19219	ENSMUSG00000097893.8	1700034P13Rik	chr1	+	9748586	9748648	9748586	9748645	9752448	9752564	19219	0,0	1,2	2,4	2,2	102	99	1.88574e-06	0.000135926	0.0,0.0	0.493,0.66	-0.577
19245	ENSMUSG00000026889.12	Rbm18	chr2	-	36127180	36127251	36127214	36127251	36122851	36122938	19245	76111	10,17	98107	3,1	133	99	2.23452e-06	0.000155673	0.85,0.829	0.96,0.988	-0.135
19268	ENSMUSG00000039686.14	Zer1	chr2	-	30107494	30107668	30107500	30107668	30104806	30105022	19268	29,25	5,5	28,23	0,1	105	99	0.000307799	0.00928186	0.845,0.825	1.0,0.956	-0.143
19270	ENSMUSG00000022309.9	Angpt1	chr15	-	42496226	42496459	42496229	42496459	42476377	42476505	19270	26,35	64,75	10,23	10,18	102	99	0.00172292	0.0358972	0.283,0.312	0.493,0.554	-0.226
19372	ENSMUSG00000026558.13	Uck2	chr1	-	167284497	167284601	167284539	167284601	167237488	167237648	19372	3,4	0,7	0,0	1,2	141	99	2.4499e-05	0.00114296	1.0,0.286	0.0,0.0	0.643
19374	ENSMUSG00000037904.14	Ankrd9	chr12	-	110977645	110977770	110977663	110977770	110976428	110977548	19374	3,9	3,6	1,2	12,4	117	99	0.00247793	0.0472273	0.458,0.559	0.066,0.297	0.327
19435	ENSMUSG00000031816.15	Mthfsd	chr8	-	121105573	121105855	121105717	121105855	121104391	121104558	19435	31,37	3,4	19,14	0,0	198	99	0.000593529	0.015659	0.838,0.822	1.0,1.0	-0.17
19499	ENSMUSG00000029730.16	Mcm7	chr5	-	138170814	138171266	138171187	138171266	138170316	138170396	19499	36,31	9,7	55,37	0,1	198	99	1.83277e-07	1.86655e-05	0.667,0.689	1.0,0.949	-0.296
19553	ENSMUSG00000036777.8	Anln	chr9	-	22376132	22376522	22376139	22376522	22374926	22375140	19553	0,2	7,16	4,2	5,3	106	99	0.00203446	0.0405477	0.0,0.105	0.428,0.384	-0.354
19565	ENSMUSG00000026121.13	Sema4c	chr1	-	36556496	36556929	36556802	36556929	36555931	36556077	19565	26,36	3,6	0,7	21,19	198	99	3.77476e-15	1.65935e-12	0.812,0.75	0.0,0.156	0.703
19591	ENSMUSG00000020640.10	Itsn2	chr12	+	4711952	4712342	4711952	4712036	4712466	4712640	19591	1,2	58,93	2,5	11,10	198	99	0.000363267	0.0106861	0.009,0.011	0.083,0.2	-0.132
19647	ENSMUSG00000026000.16	Lancl1	chr1	-	67038771	67038834	67038803	67038834	67038494	67038591	19647	24,28	0,0	46,35	3,5	131	99	0.000622365	0.0162549	1.0,1.0	0.921,0.841	0.119
19648	ENSMUSG00000026000.16	Lancl1	chr1	-	67038771	67038834	67038823	67038834	67038494	67038591	19648	24,28	2,8	46,35	0,0	151	99	6.37511e-06	0.000383379	0.887,0.696	1.0,1.0	-0.209
19653	ENSMUSG00000026000.16	Lancl1	chr1	-	67038788	67038834	67038803	67038834	67038494	67038591	19653	2,3	0,0	2,3	3,5	114	99	1.33809e-06	0.000101619	1.0,1.0	0.367,0.343	0.645
19654	ENSMUSG00000026000.16	Lancl1	chr1	-	67038788	67038834	67038823	67038834	67038494	67038591	19654	2,3	2,8	2,3	0,0	134	99	1.81434e-08	2.39946e-06	0.425,0.217	1.0,1.0	-0.679
19657	ENSMUSG00000026000.16	Lancl1	chr1	-	67038803	67038834	67038823	67038834	67038494	67038591	19657	0,0	2,8	3,5	0,0	119	99	1.1271e-12	3.78257e-10	0.0,0.0	1.0,1.0	-1
19790	ENSMUSG00000044783.16	Hjurp	chr1	-	88276969	88277285	88277218	88277285	88270201	88270299	19790	24,36	0,0	79,84	50,35	198	99	6.97664e-13	2.39283e-10	1.0,1.0	0.441,0.545	0.507
19791	ENSMUSG00000044783.16	Hjurp	chr1	-	88277178	88277285	88277218	88277285	88270201	88270299	19791	24,36	0,0	78,81	50,35	139	99	6.14286e-13	2.13028e-10	1.0,1.0	0.526,0.622	0.426
19799	ENSMUSG00000116048.1	2022-09-02	chr1	+	93479060	93479314	93479060	93479180	93489123	93489154	19799	20,57	58,85	23,32	9,22	198	99	0.000133991	0.00468853	0.147,0.251	0.561,0.421	-0.292
19801	ENSMUSG00000116048.1	2022-09-02	chr1	+	93478992	93479297	93478992	93479068	93489127	93489154	19801	18,18	67115	34,50	65,84	198	99	1.41647e-05	0.000723141	0.118,0.073	0.207,0.229	-0.122
19802	ENSMUSG00000116048.1	2022-09-02	chr1	+	93478992	93479314	93478992	93479068	93489127	93489154	19802	28,35	67115	49,52	65,84	198	99	0.00195634	0.0394185	0.173,0.132	0.274,0.236	-0.103
19805	ENSMUSG00000116048.1	2022-09-02	chr1	+	93479060	93479314	93479060	93479180	93489127	93489154	19805	10,17	2,4	15,5	1,0	198	99	0.00195838	0.0394253	0.714,0.68	0.882,1.0	-0.244
19812	ENSMUSG00000041153.9	Osgin2	chr4	-	16013515	16013796	16013686	16013796	16006356	16006493	19812	4,1	0,0	5,1	5,1	198	99	9.83759e-07	7.91343e-05	1.0,1.0	0.333,0.333	0.667
19831	ENSMUSG00000020290.14	Xpo1	chr11	+	23268589	23268912	23268589	23268690	23271132	23271205	19831	3,4	9,13	13,5	4,2	198	99	6.62856e-05	0.00262877	0.143,0.133	0.619,0.556	-0.45
19874	ENSMUSG00000078580.3	E430018J23Rik	chr7	-	127393207	127393629	127393289	127393629	127393000	127393111	19874	12,26	4,5	3,4	0,0	181	99	5.09812e-05	0.00211874	0.621,0.74	1.0,1.0	-0.32
19876	ENSMUSG00000078580.3	E430018J23Rik	chr7	-	127393207	127393619	127393252	127393619	127393000	127393114	19876	4,14	16,36	0,0	1,3	144	99	0.000371483	0.0108561	0.147,0.211	0.0,0.0	0.179
19887	ENSMUSG00000028041.17	Adam15	chr3	-	89340712	89340937	89340862	89340937	89340400	89340472	19887	0,1	13,16	4,4	10,11	198	99	0.000667182	0.0171669	0.0,0.03	0.167,0.154	-0.146
19895	ENSMUSG00000028041.17	Adam15	chr3	-	89349669	89349959	89349808	89349959	89346876	89347066	19895	2,7	0,0	12,5	3,4	198	99	2.35553e-06	0.000162651	1.0,1.0	0.667,0.385	0.474
19897	ENSMUSG00000028041.17	Adam15	chr3	-	89349669	89349959	89349808	89349959	89347151	89347228	19897	2,7	0,0	13,5	1,4	198	99	0.000188134	0.00625998	1.0,1.0	0.867,0.385	0.374
19899	ENSMUSG00000019437.17	Tlcd1	chr11	+	78178955	78179221	78178955	78179056	78179369	78179452	19899	21,44	79113	16,23	13,11	198	99	3.04006e-06	0.000202742	0.117,0.163	0.381,0.511	-0.306
19931	ENSMUSG00000029319.8	Coq2	chr5	-	100665869	100666161	100666067	100666161	100663579	100663701	19931	1,10	4,1	0,0	1,2	198	99	0.000150723	0.00518087	0.111,0.833	0.0,0.0	0.472
19950	ENSMUSG00000026135.17	Zfp142	chr1	-	74587367	74587656	74587563	74587656	74585383	74585697	19950	3,6	41,70	17,10	26,28	198	99	5.12923e-06	0.000315756	0.035,0.041	0.246,0.152	-0.161
19961	ENSMUSG00000055991.15	Zkscan5	chr5	+	145218286	145218883	145218286	145218720	145220052	145221750	19961	72106	9,10	24,15	1,0	198	99	0.00098655	0.0234652	0.8,0.841	0.923,1.0	-0.141
20037	ENSMUSG00000024742.15	Fen1	chr19	-	10203687	10204023	10203803	10204023	10199137	10201097	20037	670813	111215	227168	20,15	198	99	3.61414e-05	0.00157229	0.751,0.654	0.85,0.848	-0.146
20055	ENSMUSG00000024160.16	Spsb3	chr17	+	24886758	24887256	24886758	24887105	24887779	24887917	20055	12,6	51,92	6,14	22,18	198	99	0.00168808	0.0353237	0.105,0.032	0.12,0.28	-0.132
20077	ENSMUSG00000026309.14	Ilkap	chr1	-	91388319	91388446	91388354	91388446	91387214	91387341	20077	25,36	28,47	11,12	54,44	134	99	1.61096e-05	0.000807058	0.397,0.361	0.131,0.168	0.229
20082	ENSMUSG00000026309.14	Ilkap	chr1	-	91391108	91391192	91391131	91391192	91390606	91390663	20082	21,26	213298	36,39	135138	122	99	7.35338e-07	6.10389e-05	0.074,0.066	0.178,0.187	-0.112
20102	ENSMUSG00000027429.16	Sec23b	chr2	+	144559206	144559467	144559206	144559322	144562131	144562189	20102	1,3	0,0	0,0	2,2	198	99	8.73558e-10	1.63261e-07	1.0,1.0	0.0,0.0	1
20130	ENSMUSG00000040964.16	Arhgef10l	chr4	-	140616684	140617065	140616992	140617065	140611226	140611412	20130	11,35	7,1	4,5	0,0	198	99	0.000316798	0.0095256	0.44,0.946	1.0,1.0	-0.307
20179	ENSMUSG00000026436.15	Elk4	chr1	+	132008108	132008419	132008108	132008187	132013025	132013234	20179	20,14	4,1	11,6	0,0	198	99	0.000825916	0.0204343	0.714,0.875	1.0,1.0	-0.206
20183	ENSMUSG00000026436.15	Elk4	chr1	+	132008296	132008923	132008296	132008419	132014382	132014598	20183	1,6	8,3	0,0	9,4	198	99	0.000378794	0.0110388	0.059,0.5	0.0,0.0	0.279
20235	ENSMUSG00000085396.7	Firre	chrX	-	50631422	50631846	50631772	50631846	50630890	50630995	20235	5,9	2,2	1,1	0,0	198	99	0.00100699	0.0238086	0.556,0.692	1.0,1.0	-0.376
20246	ENSMUSG00000034349.14	Smc4	chr3	+	69004969	69005415	69004969	69005095	69006075	69006224	20246	1,3	0,0	0,3	12,3	198	99	1.23209e-09	2.22283e-07	1.0,1.0	0.0,0.333	0.834
20286	ENSMUSG00000040865.15	Ino80d	chr1	-	63113813	63114255	63114210	63114255	63105655	63105759	20286	12,19	14,24	11,10	47,37	198	99	0.000757424	0.0189879	0.3,0.284	0.105,0.119	0.18
20304	ENSMUSG00000027479.14	Mapre1	chr2	+	153742391	153742617	153742391	153742594	153746255	153746379	20304	0,0	1,1	2,2	4,0	122	99	0.000826496	0.0204343	0.0,0.0	0.289,1.0	-0.644
20357	ENSMUSG00000026017.13	Carf	chr1	+	60141447	60141568	60141447	60141468	60146108	60146172	20357	2,2	0,0	2,0	2,1	198	99	6.12539e-05	0.00245732	1.0,1.0	0.333,0.0	0.834
20377	ENSMUSG00000026213.15	Stk11ip	chr1	+	75525418	75525755	75525418	75525514	75525851	75525959	20377	6,14	64113	11,10	14,19	198	99	1.24865e-05	0.000657193	0.045,0.058	0.282,0.208	-0.194
20441	ENSMUSG00000036281.13	Snapc4	chr2	-	26378160	26378632	26378493	26378632	26378020	26378067	20441	10,16	86125	15,12	5,13	198	99	1.9079e-07	1.91471e-05	0.055,0.06	0.6,0.316	-0.4
20513	ENSMUSG00000021111.15	Papola	chr12	+	105784693	105785165	105784693	105784918	105799650	105799824	20513	12,10	0,0	6,2	3,2	198	99	3.67327e-06	0.00023835	1.0,1.0	0.5,0.333	0.584
20565	ENSMUSG00000098090.8	2700099C18Rik	chr17	+	94763771	94763924	94763771	94763882	94766856	94766947	20565	15,22	3,3	8,6	0,0	141	99	0.00123373	0.0277221	0.778,0.837	1.0,1.0	-0.193
20575	ENSMUSG00000025212.17	Sfxn3	chr19	+	45047502	45047840	45047502	45047594	45049103	45049267	20575	5,16	3,5	1,2	13,5	198	99	8.18669e-06	0.00047203	0.455,0.615	0.037,0.167	0.433
20576	ENSMUSG00000025212.17	Sfxn3	chr19	+	45047502	45047971	45047502	45047594	45049103	45049267	20576	6,13	3,5	1,2	13,5	198	99	8.88217e-06	0.000502213	0.5,0.565	0.037,0.167	0.43
20588	ENSMUSG00000053581.13	Zfand2a	chr5	-	139484131	139484517	139484276	139484517	139482701	139482797	20588	38,39	95119	59,37	52,54	198	99	0.000119921	0.00429719	0.167,0.141	0.362,0.255	-0.154
20592	ENSMUSG00000026785.14	Pkn3	chr2	+	30078212	30078350	30078212	30078345	30079533	30079762	20592	0,7	10,24	0,0	7,3	104	99	0.00117024	0.0267145	0.0,0.217	0.0,0.0	0.108
20649	ENSMUSG00000040187.15	Arntl2	chr6	+	146796054	146796281	146796054	146796149	146805435	146805578	20649	7,11	11,18	1,1	13,3	198	99	0.0013469	0.0296878	0.241,0.234	0.037,0.143	0.147
20657	ENSMUSG00000040187.15	Arntl2	chr6	+	146828098	146828283	146828098	146828186	146829692	146829801	20657	0,1	33,41	2,3	5,3	196	99	0.000956496	0.0229287	0.0,0.012	0.168,0.336	-0.246
20670	ENSMUSG00000031862.11	Atp13a1	chr8	+	69797081	69797172	69797081	69797151	69797706	69798721	20670	3,9	0,6	1,1	0,0	120	99	0.000680477	0.0174085	1.0,0.553	1.0,1.0	-0.224
20696	ENSMUSG00000029810.15	Tmem176b	chr6	-	48840699	48841190	48840853	48841190	48840360	48840453	20696	7,9	0,0	7,8	2,2	198	99	0.000671604	0.017238	1.0,1.0	0.636,0.667	0.349
20697	ENSMUSG00000029810.15	Tmem176b	chr6	-	48840699	48841190	48840967	48841190	48840360	48840453	20697	7,9	5,9	7,8	1,0	198	99	2.1723e-05	0.00103511	0.412,0.333	0.778,1.0	-0.516
20699	ENSMUSG00000029810.15	Tmem176b	chr6	-	48840853	48840980	48840967	48840980	48840360	48840453	20699	0,0	5,9	2,2	1,0	198	99	9.35256e-06	0.000517558	0.0,0.0	0.5,1.0	-0.75
20702	ENSMUSG00000029810.15	Tmem176b	chr6	-	48840967	48841370	48841347	48841370	48840360	48840453	20702	9,9	0,0	2,0	0,3	198	99	0.002303	0.0447897	1.0,1.0	1.0,0.0	0.5
20806	ENSMUSG00000021905.14	Dph3	chr14	-	32085496	32085692	32085551	32085692	32084906	32084981	20806	0,0	5,2	8,3	4,1	154	99	3.856e-07	3.50529e-05	0.0,0.0	0.562,0.659	-0.611
20827	ENSMUSG00000042688.16	Mapk6	chr9	-	75409854	75409985	75409867	75409985	75398411	75398751	20827	32,61	1,4	54,47	14,14	112	99	6.6779e-05	0.00264025	0.966,0.931	0.773,0.748	0.188
20864	ENSMUSG00000026082.11	Rev1	chr1	-	38128251	38128315	38128305	38128315	38108403	38108467	20864	12,26	8,0	6,5	0,0	153	99	0.00116277	0.0265869	0.493,1.0	1.0,1.0	-0.254
20888	ENSMUSG00000024163.17	Mapk8ip3	chr17	-	24917983	24918136	24918087	24918136	24914458	24914705	20888	149225	24,40	292279	129107	198	99	8.238e-07	6.71322e-05	0.756,0.738	0.531,0.566	0.199
20889	ENSMUSG00000024163.17	Mapk8ip3	chr17	-	24917994	24918139	24918087	24918139	24916503	24916629	20889	154234	15,15	290276	1,2	192	99	7.50271e-10	1.41919e-07	0.841,0.889	0.993,0.986	-0.125
20915	ENSMUSG00000027893.14	Ahcyl1	chr3	-	107669896	107670320	107670203	107670320	107669092	107669181	20915	11,9	0,0	7,5	2,3	198	99	1.80452e-05	0.000892569	1.0,1.0	0.636,0.455	0.455
20916	ENSMUSG00000027893.14	Ahcyl1	chr3	-	107669909	107670320	107670203	107670320	107669092	107669181	20916	12,8	0,0	7,5	2,3	198	99	1.80453e-05	0.000892569	1.0,1.0	0.636,0.455	0.455
20919	ENSMUSG00000068457.14	Uty	chrY	-	1199345	1199513	1199454	1199513	1197205	1197326	20919	10,10	102159	7,6	21,18	198	99	0.00195206	0.0393832	0.047,0.03	0.143,0.143	-0.104
20922	ENSMUSG00000004451.14	Ralb	chr1	-	119504409	119504794	119504517	119504794	119483493	119483656	20922	2,6	13,9	0,0	1,11	198	99	0.000509983	0.0138289	0.071,0.25	0.0,0.0	0.161
20926	ENSMUSG00000044328.13	Trp53i13	chr11	-	77512321	77512694	77512667	77512694	77509597	77509726	20926	7,19	6,10	6,5	25,17	198	99	6.48794e-05	0.00258615	0.368,0.487	0.107,0.128	0.31
20928	ENSMUSG00000044328.13	Trp53i13	chr11	-	77512652	77512694	77512667	77512694	77509597	77509726	20928	93146	6,10	70,74	25,17	114	99	2.11201e-06	0.000149474	0.931,0.927	0.709,0.791	0.179
21148	ENSMUSG00000007035.15	Msh5	chr17	-	35043728	35044196	35044024	35044196	35041469	35041515	21148	5,3	1,3	1,1	0,0	198	99	0.00027008	0.00837086	0.714,0.333	1.0,1.0	-0.477
21165	ENSMUSG00000008690.15	Ncaph2	chr15	+	89355762	89356024	89355762	89355926	89360355	89360457	21165	232333	269366	307250	188139	197	99	1.18003e-06	9.2339e-05	0.302,0.314	0.451,0.475	-0.155
21184	ENSMUSG00000026999.14	Nup35	chr2	+	80617235	80617606	80617235	80617284	80621193	80621240	21184	62111	36,49	41,35	34,44	198	99	0.00249693	0.0474036	0.463,0.531	0.376,0.285	0.166
21190	ENSMUSG00000090137.8	Uba52	chr8	-	70509720	70509849	70509813	70509849	70509520	70509631	21190	0,3	2,2	4,2	0,0	192	99	3.35374e-06	0.000221297	0.0,0.436	1.0,1.0	-0.782
21227	ENSMUSG00000009995.17	Taz	chrX	+	74281911	74282045	74281911	74282040	74282717	74282885	21227	7,2	13,11	2,4	0,2	104	99	0.00259795	0.048758	0.339,0.148	1.0,0.656	-0.585
21230	ENSMUSG00000009995.17	Taz	chrX	+	74283647	74283793	74283647	74283693	74283931	74284314	21230	9,10	116125	13,4	26,15	198	99	0.000106824	0.00393296	0.037,0.038	0.2,0.118	-0.121
21247	ENSMUSG00000026020.9	Nop58	chr1	+	59684970	59685230	59684970	59685114	59690485	59690989	21247	2,4	0,4	0,0	6,7	198	99	0.000171021	0.00576428	1.0,0.333	0.0,0.0	0.666
21309	ENSMUSG00000044768.16	D1Ertd622e	chr1	-	97660730	97661676	97661287	97661676	97654599	97654689	21309	54,72	19,17	36,16	2,0	198	99	2.78178e-05	0.00125829	0.587,0.679	0.9,1.0	-0.317
21312	ENSMUSG00000044768.16	D1Ertd622e	chr1	-	97661287	97661676	97661554	97661676	97654599	97654689	21312	19,17	26,22	2,0	5,6	198	99	0.0018422	0.037629	0.268,0.279	0.167,0.0	0.19
21323	ENSMUSG00000026159.13	Agfg1	chr1	+	82886113	82886467	82886113	82886187	82893423	82893582	21323	435715	93134	245175	162192	198	99	7.77156e-16	3.56703e-13	0.7,0.727	0.431,0.313	0.342
21334	ENSMUSG00000062270.14	Morf4l1	chr9	-	90114213	90114529	90114466	90114529	90110125	90110172	21334	10,11	0,5	4,1	0,0	198	99	0.00164255	0.034639	1.0,0.524	1.0,1.0	-0.238
21369	ENSMUSG00000025968.16	Ndufs1	chr1	-	63176603	63176732	63176699	63176732	63176427	63176524	21369	53,78	3,8	56,60	0,0	195	99	2.66631e-05	0.00121842	0.9,0.832	1.0,1.0	-0.134
21370	ENSMUSG00000025968.16	Ndufs1	chr1	-	63176603	63176793	63176764	63176793	63176427	63176524	21370	90116	6,10	89109	1,1	198	99	5.9369e-05	0.00239401	0.882,0.853	0.978,0.982	-0.113
21435	ENSMUSG00000021913.8	Ogdhl	chr14	+	32322018	32322176	32322018	32322025	32323878	32323947	21435	2,8	1,3	2,5	0,0	198	99	0.000304229	0.00920087	0.5,0.571	1.0,1.0	-0.465
21436	ENSMUSG00000021913.8	Ogdhl	chr14	+	32322018	32322443	32322018	32322025	32323878	32323947	21436	3,4	1,3	2,7	0,0	198	99	0.000128391	0.00454334	0.6,0.4	1.0,1.0	-0.5
21441	ENSMUSG00000021913.8	Ogdhl	chr14	+	32322018	32322176	32322018	32322025	32325793	32325998	21441	3,5	1,2	4,6	0,0	198	99	0.00105144	0.0245816	0.6,0.556	1.0,1.0	-0.422
21523	ENSMUSG00000026447.16	Pik3c2b	chr1	+	133046011	133046423	133046011	133046074	133066211	133068033	21523	33,39	0,0	91,57	3,5	198	99	0.00112217	0.025753	1.0,1.0	0.938,0.851	0.106
21543	ENSMUSG00000054893.15	Zfp667	chr7	+	6290533	6290699	6290533	6290662	6293848	6294616	21543	15,8	41,47	0,0	17,14	136	99	1.00878e-05	0.000547564	0.21,0.11	0.0,0.0	0.16
21556	ENSMUSG00000032381.5	Ciao2a	chr9	+	66133381	66133722	66133381	66133481	66138336	66138955	21556	5,6	2,7	10,10	0,0	198	99	4.25116e-08	5.12289e-06	0.556,0.3	1.0,1.0	-0.572
21593	ENSMUSG00000034826.14	Nup54	chr5	-	92421579	92421701	92421650	92421701	92419516	92419624	21593	4,2	0,0	1,0	0,2	170	99	0.00189151	0.03846	1.0,1.0	1.0,0.0	0.5
21636	ENSMUSG00000026374.14	Tsn	chr1	-	118311060	118311236	118311125	118311236	118309772	118309866	21636	3,6	0,1	0,3	1,2	164	99	0.00109388	0.0252523	1.0,0.784	0.0,0.475	0.655
21656	ENSMUSG00000026667.14	Uhmk1	chr1	-	170207054	170207422	170207345	170207422	170205114	170205203	21656	4,7	0,6	13,13	0,0	198	99	0.000888178	0.021543	1.0,0.368	1.0,1.0	-0.316
21665	ENSMUSG00000097080.8	1700086O06Rik	chr18	-	38249713	38250173	38250107	38250173	38240838	38240953	21665	28,53	2,0	15,3	2,3	198	99	0.00164809	0.034709	0.875,1.0	0.789,0.333	0.376
21760	ENSMUSG00000026021.15	Sumo1	chr1	-	59670707	59670739	59670723	59670739	59655457	59655532	21760	2,2	0,0	0,0	1,2	115	99	2.89708e-09	4.86133e-07	1.0,1.0	0.0,0.0	1
21788	ENSMUSG00000026048.16	Ercc5	chr1	+	44147908	44148146	44147908	44147965	44156936	44157112	21788	46,83	12,9	86,68	1,0	198	99	6.61435e-08	7.64595e-06	0.657,0.822	0.977,1.0	-0.249
21856	ENSMUSG00000011958.17	Bnip2	chr9	+	69997080	69997488	69997080	69997257	69998247	69998333	21856	1,2	8,10	3,1	0,0	198	99	3.72294e-08	4.59275e-06	0.059,0.091	1.0,1.0	-0.925
22001	ENSMUSG00000020368.15	Canx	chr11	-	50319733	50320029	50319913	50320029	50311603	50311784	22001	1,5	2,4	1,4	0,0	198	99	1.17561e-07	1.27403e-05	0.2,0.385	1.0,1.0	-0.708
22024	ENSMUSG00000068823.10	Csde1	chr3	+	103020663	103020891	103020663	103020806	103028788	103029212	22024	11,15	2,6	2,1	0,0	184	99	1.64343e-05	0.000820688	0.747,0.574	1.0,1.0	-0.34
22025	ENSMUSG00000068823.10	Csde1	chr3	+	103030056	103030197	103030056	103030109	103038691	103042757	22025	5,2	0,0	13,8	1,4	187	99	0.000272138	0.00840961	1.0,1.0	0.873,0.514	0.306
22131	ENSMUSG00000039105.6	Atp6v1g1	chr4	+	63544771	63544843	63544771	63544789	63548584	63548685	22131	54,55	15,23	172143	15,16	153	99	1.6973e-05	0.000846237	0.7,0.607	0.881,0.853	-0.214
22132	ENSMUSG00000039105.6	Atp6v1g1	chr4	+	63544771	63544980	63544771	63544789	63548584	63548685	22132	0,4	15,23	5,14	15,16	198	99	0.000600397	0.0157868	0.0,0.08	0.143,0.304	-0.183
22183	ENSMUSG00000026219.14	Trip12	chr1	-	84840293	84840516	84840482	84840516	84814822	84814969	22183	0,1	21,34	8,2	20,13	198	99	0.000101588	0.0037701	0.0,0.014	0.167,0.071	-0.112
22204	ENSMUSG00000027184.14	Caprin1	chr2	-	103775939	103776157	103776104	103776157	103775609	103775765	22204	5,14	0,0	15,8	6,0	198	99	0.000564782	0.015092	1.0,1.0	0.556,1.0	0.222
22212	ENSMUSG00000027184.14	Caprin1	chr2	-	103796187	103796544	103796513	103796544	103788137	103788203	22212	3,3	1,0	5,0	1,2	198	99	0.00184189	0.037629	0.6,1.0	0.714,0.0	0.443
22214	ENSMUSG00000027184.14	Caprin1	chr2	-	103796393	103796868	103796730	103796868	103788137	103788203	22214	39,37	22,21	53,73	9,16	198	99	0.000386028	0.0112182	0.47,0.468	0.746,0.695	-0.251
22215	ENSMUSG00000027184.14	Caprin1	chr2	-	103796513	103796868	103796730	103796868	103788137	103788203	22215	40,37	22,21	54,74	9,16	198	99	0.000365117	0.0107203	0.476,0.468	0.75,0.698	-0.252
22281	ENSMUSG00000040331.16	Nsmce4a	chr7	-	130539660	130539965	130539894	130539965	130539010	130539110	22281	121177	7,6	120,88	28,30	198	99	6.54929e-10	1.26963e-07	0.896,0.937	0.682,0.595	0.278
22308	ENSMUSG00000040174.14	Alkbh3	chr2	-	94010606	94010730	94010682	94010730	94008038	94008142	22308	2,0	2,1	1,1	0,0	175	99	0.000106984	0.00393296	0.361,0.0	1.0,1.0	-0.82
22319	ENSMUSG00000042198.12	Chchd7	chr4	+	3938889	3939117	3938889	3938962	3939423	3939526	22319	133159	22,40	102101	7,9	198	99	0.0006536	0.0168712	0.751,0.665	0.879,0.849	-0.156
22355	ENSMUSG00000058267.13	Mrps14	chr1	+	160195302	160195545	160195302	160195489	160196945	160197104	22355	13,16	4,2	4,3	5,7	155	99	0.000368331	0.0107943	0.675,0.836	0.338,0.215	0.479
22368	ENSMUSG00000008305.18	Tle1	chr4	-	72169091	72169196	72169121	72169196	72163673	72163726	22368	20,27	2,5	19,13	0,0	129	99	0.000416694	0.0118771	0.885,0.806	1.0,1.0	-0.154
22476	ENSMUSG00000022889.7	Mrpl39	chr16	-	84734268	84734537	84734488	84734537	84732341	84732481	22476	2,4	0,0	0,0	3,2	198	99	1.29646e-10	3.01969e-08	1.0,1.0	0.0,0.0	1
22496	ENSMUSG00000036249.16	Rbm43	chr2	-	51934543	51935007	51934831	51935007	51932399	51932519	22496	0,2	7,1	3,1	1,0	198	99	0.000276921	0.00852365	0.0,0.5	0.6,1.0	-0.55
22517	ENSMUSG00000015016.8	Acsf3	chr8	+	122775485	122775700	122775485	122775590	122779945	122780635	22517	2,9	3,7	0,1	9,5	198	99	4.89762e-05	0.00204906	0.25,0.391	0.0,0.091	0.275
22518	ENSMUSG00000015016.8	Acsf3	chr8	+	122775577	122775700	122775577	122775628	122779945	122780635	22518	1,8	11,25	0,0	14,2	171	99	0.000632343	0.0164238	0.05,0.156	0.0,0.0	0.103
22533	ENSMUSG00000105518.1	Gm42674	chr3	+	90602190	90602312	90602190	90602270	90604996	90605152	22533	10,10	12,19	0,1	4,4	141	99	0.000566297	0.0151066	0.369,0.27	0.0,0.149	0.245
22571	ENSMUSG00000102976.6	Zc3h11a	chr1	-	133656918	133657416	133657388	133657416	133655344	133655398	22571	0,1	3,1	2,2	0,0	198	99	8.47906e-09	1.21954e-06	0.0,0.333	1.0,1.0	-0.834
22586	ENSMUSG00000070858.12	Gm1673	chr5	+	33983469	33983900	33983469	33983639	33984051	33984140	22586	0,2	8,13	8,3	11,9	198	99	0.00240492	0.0462374	0.0,0.071	0.267,0.143	-0.17
22590	ENSMUSG00000010054.4	Tusc2	chr9	+	107563828	107564231	107563828	107564099	107564575	107564696	22590	1,0	0,2	1,2	0,0	198	99	0.00119564	0.0271003	1.0,0.0	1.0,1.0	-0.5
22598	ENSMUSG00000039850.16	Endov	chr11	+	119491346	119491704	119491346	119491459	119491784	119491956	22598	2,6	21,41	11,5	14,9	198	99	0.000492932	0.0135074	0.045,0.068	0.282,0.217	-0.193
22600	ENSMUSG00000053483.13	Usp21	chr1	-	171283696	171284026	171283961	171284026	171283354	171283441	22600	7,5	3,2	4,5	0,0	198	99	6.54688e-05	0.00259968	0.538,0.556	1.0,1.0	-0.453
22609	ENSMUSG00000003423.15	Pih1d1	chr7	+	45154643	45155093	45154643	45154958	45156305	45156399	22609	6,5	2,2	3,3	0,0	198	99	0.000384949	0.0112077	0.6,0.556	1.0,1.0	-0.422
22613	ENSMUSG00000003423.15	Pih1d1	chr7	+	45155927	45156055	45155927	45155971	45156305	45156399	22613	29,32	2,4	18,15	0,0	183	99	0.00154551	0.0329938	0.887,0.812	1.0,1.0	-0.15
22632	ENSMUSG00000035161.7	Ints6	chr14	-	62700630	62700862	62700660	62700862	62696592	62696955	22632	100173	41,65	34,39	49,38	129	99	1.17964e-06	9.2339e-05	0.652,0.671	0.347,0.441	0.267
22664	ENSMUSG00000028797.20	Tmem234	chr4	+	129600982	129601247	129600982	129601134	129602194	129602261	22664	313519	208318	562473	144131	198	99	5.05118e-11	1.29223e-08	0.429,0.449	0.661,0.644	-0.214
22671	ENSMUSG00000054057.2	A930004D18Rik	chr2	-	18028419	18028871	18028710	18028871	18027973	18028238	22671	6,7	5,13	1,2	0,0	198	99	7.7644e-06	0.000451275	0.375,0.212	1.0,1.0	-0.707
22673	ENSMUSG00000037553.14	Zdhhc18	chr4	-	133613568	133613938	133613800	133613938	133610369	133610482	22673	4,1	0,0	3,1	1,4	198	99	7.0611e-07	5.9243e-05	1.0,1.0	0.6,0.111	0.645
22707	ENSMUSG00000047878.13	A4galt	chr15	-	83251553	83251774	83251699	83251774	83230513	83230657	22707	31,48	120178	17,17	23,16	198	99	8.54171e-05	0.00325849	0.114,0.119	0.27,0.347	-0.192
22856	ENSMUSG00000059555.6	Tor4a	chr2	-	25196481	25196771	25196545	25196771	25195791	25195925	22856	3,2	1,3	4,4	0,0	163	99	0.000127014	0.00449969	0.646,0.288	1.0,1.0	-0.533
22885	ENSMUSG00000027404.15	Snrpb	chr2	-	130176837	130177166	130177014	130177166	130176628	130176752	22885	6,21	11,20	11,11	3,0	198	99	0.000498586	0.0136384	0.214,0.344	0.647,1.0	-0.544
22969	ENSMUSG00000026837.15	Col5a1	chr2	+	28028966	28029165	28028966	28029035	28032590	28032824	22969	7381211	436721	225208	446408	198	99	0	0	0.458,0.456	0.201,0.203	0.255
22982	ENSMUSG00000034617.7	Mtrr	chr13	-	68581295	68582104	68581967	68582104	68580550	68580715	22982	8,7	0,7	3,1	0,0	198	99	0.00110898	0.0255253	1.0,0.333	1.0,1.0	-0.334
22984	ENSMUSG00000034617.7	Mtrr	chr13	-	68581802	68582094	68581967	68582094	68580550	68580715	22984	5,25	0,7	5,3	0,0	198	99	0.000348643	0.0103338	1.0,0.641	1.0,1.0	-0.179
23038	ENSMUSG00000054766.13	Set	chr2	+	30067192	30067726	30067192	30067204	30068268	30068326	23038	11,10	2,4	7,11	1,0	198	99	0.00189602	0.0385265	0.733,0.556	0.778,1.0	-0.244
23055	ENSMUSG00000032280.16	Tle3	chr9	+	61373218	61373625	61373218	61373461	61373952	61374053	23055	3,7	103145	16,17	54,60	198	99	1.96762e-08	2.5912e-06	0.014,0.024	0.129,0.124	-0.107
23093	ENSMUSG00000062661.6	Ncs1	chr2	+	31287286	31287541	31287286	31287519	31292283	31295989	23093	5,14	3,3	0,3	9,3	121	99	0.00107439	0.024876	0.577,0.792	0.0,0.45	0.46
23131	ENSMUSG00000030695.16	Aldoa	chr7	-	126798675	126799069	126799044	126799069	126797973	126798126	23131	558876	650987	10261053	804583	198	99	1.89461e-05	0.000925394	0.3,0.307	0.39,0.475	-0.129
23133	ENSMUSG00000030695.16	Aldoa	chr7	-	126798822	126799069	126799044	126799069	126797973	126798126	23133	562885	650987	10261055	804583	198	99	2.61685e-05	0.0012011	0.302,0.31	0.39,0.475	-0.127
23134	ENSMUSG00000030695.16	Aldoa	chr7	-	126799003	126799069	126799044	126799069	126797973	126798126	23134	297457	650987	620715	804583	140	99	1.38555e-06	0.000104455	0.244,0.247	0.353,0.464	-0.163
23139	ENSMUSG00000055866.9	Per2	chr1	-	91435016	91435170	91435018	91435170	91434621	91434730	23139	13,28	0,0	9,1	4,1	101	99	0.000193041	0.00636219	1.0,1.0	0.688,0.495	0.409
23185	ENSMUSG00000073791.11	Efcab7	chr4	+	99829499	99829554	99829499	99829535	99831392	99831580	23185	22,21	1,20	9,8	1,0	118	99	0.0018871	0.0384203	0.949,0.468	0.883,1.0	-0.233
23227	ENSMUSG00000070003.7	Ssbp4	chr8	-	70599101	70599438	70599373	70599438	70598992	70599028	23227	12,18	0,5	5,4	0,0	198	99	0.00175722	0.0364902	1.0,0.643	1.0,1.0	-0.178
23260	ENSMUSG00000038900.17	Rpl12	chr2	+	32961558	32961913	32961558	32961862	32962048	32962122	23260	0,0	1,1	1,3	2,0	150	99	0.00083354	0.0205495	0.0,0.0	0.248,1.0	-0.624
23323	ENSMUSG00000033416.15	Gucd1	chr10	-	75517693	75517972	75517859	75517972	75512071	75512156	23323	5,12	3,12	4,2	0,0	198	99	2.29082e-06	0.000158886	0.455,0.333	1.0,1.0	-0.606
23330	ENSMUSG00000066456.14	Hmgn3	chr9	-	83110774	83111102	83110992	83111102	83109947	83110429	23330	44,70	132194	37,47	44,29	198	99	7.27915e-06	0.00042866	0.143,0.153	0.296,0.448	-0.224
23332	ENSMUSG00000066456.14	Hmgn3	chr9	-	83110787	83111102	83110992	83111102	83109947	83110429	23332	44,68	132194	37,45	44,29	198	99	4.84307e-06	0.000302052	0.143,0.149	0.296,0.437	-0.221
23545	ENSMUSG00000026755.14	Arpc5l	chr2	+	39008156	39008570	39008156	39008324	39013116	39013187	23545	80111	24,25	75,91	5,8	198	99	0.000112446	0.00409038	0.625,0.689	0.882,0.85	-0.209
23608	ENSMUSG00000005774.12	Rfx5	chr3	+	94954107	94954451	94954107	94954251	94955014	94955146	23608	5,19	52109	12,20	16,12	198	99	2.90153e-07	2.7779e-05	0.046,0.08	0.273,0.455	-0.301
23609	ENSMUSG00000005774.12	Rfx5	chr3	+	94954107	94954551	94954107	94954251	94955014	94955146	23609	15,23	52109	13,21	16,12	198	99	1.7662e-05	0.000876388	0.126,0.095	0.289,0.467	-0.268
23623	ENSMUSG00000040782.12	Cop1	chr1	+	159266733	159266923	159266733	159266810	159268108	159268185	23623	63,88	0,0	79,56	6,4	198	99	5.18078e-05	0.0021406	1.0,1.0	0.868,0.875	0.129
23674	ENSMUSG00000061136.14	Prpf40a	chr2	-	53190824	53191250	53191148	53191250	53189968	53190100	23674	547612	273474	632560	228184	198	99	0.000171857	0.00578623	0.5,0.392	0.581,0.603	-0.146
23677	ENSMUSG00000061136.14	Prpf40a	chr2	-	53190859	53191250	53191148	53191250	53189968	53190100	23677	548613	273474	632559	228184	198	99	0.000184465	0.00615099	0.501,0.393	0.581,0.603	-0.145
23679	ENSMUSG00000061136.14	Prpf40a	chr2	-	53190913	53191250	53191148	53191250	53189968	53190100	23679	547617	273474	632559	228184	198	99	0.000165844	0.00562626	0.5,0.394	0.581,0.603	-0.145
23690	ENSMUSG00000071415.6	Rpl23	chr11	-	97781956	97782382	97782343	97782382	97781403	97781462	23690	35,50	13,24	291274	29,35	198	99	5.15641e-07	4.49544e-05	0.574,0.51	0.834,0.797	-0.273
23703	ENSMUSG00000052337.15	Immt	chr6	+	71852795	71853268	71852795	71852867	71856911	71857048	23703	424736	594857	508381	255226	198	99	2.96008e-12	8.96961e-10	0.263,0.3	0.499,0.457	-0.197
23733	ENSMUSG00000026987.16	Baz2b	chr2	-	60076860	60076911	60076869	60076911	60006042	60006189	23733	6,4	70,99	8,7	24,25	108	99	0.000298597	0.00904807	0.073,0.036	0.234,0.204	-0.165
23746	ENSMUSG00000060373.15	Hnrnpc	chr14	-	52098315	52098539	52098380	52098539	52098014	52098040	23746	43,30	12,17	8,5	12,10	164	99	0.000702253	0.017871	0.684,0.516	0.287,0.232	0.341
23789	ENSMUSG00000056938.16	Acbd4	chr11	+	103103525	103104017	103103525	103103644	103104092	103104174	23789	13,9	12,17	7,8	0,1	198	99	1.78966e-06	0.000130507	0.351,0.209	1.0,0.8	-0.62
23870	ENSMUSG00000053453.9	Thoc7	chr14	-	13957061	13957559	13957553	13957559	13954538	13954656	23870	98160	32,42	113,93	8,10	198	99	9.26968e-06	0.000513883	0.605,0.656	0.876,0.823	-0.219
23904	ENSMUSG00000032966.14	Fkbp1a	chr2	+	151542817	151543198	151542817	151542865	151544012	151544140	23904	45,58	5,3	35,44	1,0	198	99	0.00198008	0.039743	0.818,0.906	0.946,1.0	-0.111
23930	ENSMUSG00000000001.4	Gnai3	chr3	-	108145702	108146146	108146045	108146146	108123794	108123837	23930	1,0	2,2	1,1	0,0	198	99	5.45201e-09	8.26032e-07	0.2,0.0	1.0,1.0	-0.9
23941	ENSMUSG00000000001.4	Gnai3	chr3	-	108146045	108146146	108146070	108146146	108123794	108123837	23941	2,2	0,3	0,0	4,1	124	99	0.00041185	0.0117605	1.0,0.347	0.0,0.0	0.673
23943	ENSMUSG00000074024.5	4632427E13Rik	chr7	-	92741061	92741459	92741369	92741459	92740705	92740976	23943	3,2	1,0	1,1	1,1	198	99	0.00179998	0.0371309	0.6,1.0	0.333,0.333	0.467
24055	ENSMUSG00000047459.14	Dynlrb1	chr2	+	155236532	155236823	155236532	155236677	155242730	155242806	24055	6,23	7,15	1,1	1,9	198	99	0.00119879	0.0271284	0.3,0.434	0.333,0.053	0.174
24068	ENSMUSG00000047459.14	Dynlrb1	chr2	+	155236810	155236940	155236810	155236823	155242730	155242806	24068	25,58	6,23	14,15	1,1	198	99	0.0019777	0.0397207	0.676,0.558	0.875,0.882	-0.262
24097	ENSMUSG00000026238.14	Ptma	chr1	+	86529172	86529546	86529172	86529244	86529730	86529804	24097	74,72	67,83	106,75	29,28	198	99	3.85297e-08	4.71589e-06	0.356,0.303	0.646,0.573	-0.28
24135	ENSMUSG00000034127.15	Tspan8	chr10	+	115817277	115817386	115817277	115817350	115817492	115817660	24135	495727	223283	220134	209223	135	99	2.55182e-09	4.30513e-07	0.619,0.653	0.436,0.306	0.265
24136	ENSMUSG00000034127.15	Tspan8	chr10	+	115817277	115817388	115817277	115817350	115817492	115817660	24136	54,91	223283	19,16	209223	137	99	1.40947e-09	2.45759e-07	0.149,0.189	0.062,0.049	0.113
24191	ENSMUSG00000024962.13	Vegfb	chr19	-	6986003	6986486	6986289	6986486	6985804	6985840	24191	16,12	1,0	11,10	7,5	198	99	4.71239e-06	0.000295933	0.889,1.0	0.44,0.5	0.475
24194	ENSMUSG00000024962.13	Vegfb	chr19	-	6986009	6986486	6986289	6986486	6985804	6985840	24194	16,16	1,0	11,10	7,5	198	99	2.11904e-06	0.000149632	0.889,1.0	0.44,0.5	0.475
24196	ENSMUSG00000024962.13	Vegfb	chr19	-	6986030	6986486	6986289	6986486	6985804	6985840	24196	14,16	1,0	10,13	7,5	198	99	6.94298e-06	0.000411972	0.875,1.0	0.417,0.565	0.447
24237	ENSMUSG00000045969.8	Ing1	chr8	+	11556062	11556370	11556062	11556095	11557002	11557045	24237	14,19	0,0	17,15	4,2	198	99	7.00597e-05	0.00274804	1.0,1.0	0.68,0.789	0.265
24241	ENSMUSG00000028133.17	Rwdd3	chr3	-	121156166	121156302	121156186	121156302	121155938	121156057	24241	7,3	5,18	0,0	3,6	119	99	8.51209e-05	0.00325179	0.538,0.122	0.0,0.0	0.33
24261	ENSMUSG00000050335.17	Lgals3	chr14	+	47373915	47373979	47373915	47373952	47379258	47379302	24261	24,27	0,0	24,27	3,5	126	99	0.000154481	0.00529473	1.0,1.0	0.863,0.809	0.164
24434	ENSMUSG00000032536.11	Trak1	chr9	+	121460358	121460818	121460358	121460577	121468984	121469087	24434	73,89	34,41	105,89	5,6	198	99	1.62848e-12	5.29441e-10	0.518,0.52	0.913,0.881	-0.378
24454	ENSMUSG00000000149.10	Gna12	chr5	-	140761265	140761399	140761357	140761399	140760192	140761118	24454	3,2	1,5	2,8	0,1	191	99	0.000248624	0.00784612	0.609,0.172	1.0,0.806	-0.513
24455	ENSMUSG00000000149.10	Gna12	chr5	-	140761313	140761399	140761357	140761399	140760192	140761118	24455	8,2	1,5	4,8	0,1	143	99	0.00177733	0.0367935	0.847,0.217	1.0,0.847	-0.391
24494	ENSMUSG00000078866.10	Zfp970	chr2	+	177464732	177464848	177464732	177464820	177473285	177473412	24494	46,53	7,2	18,9	0,0	127	99	0.00131565	0.0291846	0.837,0.954	1.0,1.0	-0.105
24503	ENSMUSG00000022948.16	Setd4	chr16	-	93603787	93604063	93603973	93604063	93601637	93601798	24503	9,8	4,17	8,9	0,0	198	99	6.41255e-08	7.46799e-06	0.529,0.19	1.0,1.0	-0.64
24509	ENSMUSG00000040272.14	Accs	chr2	-	93849544	93849799	93849760	93849799	93847916	93848207	24509	6,4	1,3	3,3	0,0	198	99	0.000509441	0.0138262	0.75,0.4	1.0,1.0	-0.425
24531	ENSMUSG00000038437.11	Mllt6	chr11	+	97672456	97672682	97672456	97672592	97673492	97673548	24531	16,41	4,10	11,10	0,0	189	99	1.30105e-05	0.000679047	0.677,0.682	1.0,1.0	-0.321
24639	ENSMUSG00000045302.13	Preb	chr5	-	30958232	30958543	30958470	30958543	30950852	30955737	24639	8,10	2,6	4,3	0,0	198	99	1.72845e-06	0.000126339	0.667,0.455	1.0,1.0	-0.439
24650	ENSMUSG00000045302.13	Preb	chr5	-	30959895	30960262	30960143	30960262	30959360	30959412	24650	7,1	0,1	1,0	2,2	198	99	9.7584e-06	0.000534332	1.0,0.333	0.2,0.0	0.567
24665	ENSMUSG00000005161.15	Prdx2	chr8	+	84969610	84970106	84969610	84969843	84970239	84970344	24665	1,0	0,2	5,1	0,0	198	99	0.00119564	0.0271003	1.0,0.0	1.0,1.0	-0.5
24698	ENSMUSG00000025747.12	Tyms	chr5	-	30069833	30071707	30071226	30071707	30068465	30068640	24698	8,7	3,1	2,3	0,0	198	99	0.00135158	0.0297701	0.571,0.778	1.0,1.0	-0.326
24726	ENSMUSG00000021831.9	Ero1l	chr14	-	45294317	45294535	45294510	45294535	45292930	45293177	24726	3,10	6,7	13,9	0,2	198	99	0.000207531	0.0067331	0.2,0.417	1.0,0.692	-0.537
24747	ENSMUSG00000055943.5	Emc7	chr2	+	112454996	112455454	112454996	112455170	112459459	112459579	24747	1,1	0,0	0,0	2,1	198	99	5.94589e-09	8.87929e-07	1.0,1.0	0.0,0.0	1
24799	ENSMUSG00000027395.15	Polr1b	chr2	+	129113500	129113782	129113500	129113727	129115638	129115772	24799	308465	4,12	72,49	7,15	154	99	1.49095e-07	1.56155e-05	0.98,0.961	0.869,0.677	0.197
24815	ENSMUSG00000040093.15	Bmf	chr2	-	118549303	118549675	118549539	118549675	118546908	118547012	24815	0,0	5,1	1,1	0,0	198	99	3.78088e-09	6.02066e-07	0.0,0.0	1.0,1.0	-1
24921	ENSMUSG00000064037.13	Gpn1	chr5	+	31495000	31495435	31495000	31495265	31495517	31495611	24921	25,33	4,4	56,35	2,0	198	99	0.00232011	0.0449769	0.758,0.805	0.933,1.0	-0.185
24929	ENSMUSG00000025607.15	Copg2	chr6	-	30896366	30896426	30896384	30896426	30895541	30895594	24929	0,2	1,7	4,1	1,1	117	99	0.00164051	0.0346193	0.0,0.195	0.772,0.458	-0.517
24949	ENSMUSG00000027201.16	Myef2	chr2	-	125088862	125089037	125088897	125089037	125087676	125087703	24949	10,18	0,6	6,1	0,0	134	99	0.000687621	0.0175481	1.0,0.689	1.0,1.0	-0.155
24970	ENSMUSG00000062604.11	Srpk2	chr5	-	23527896	23528062	23527923	23528062	23526789	23526815	24970	161229	85148	261218	74,52	126	99	5.22174e-07	4.53971e-05	0.598,0.549	0.735,0.767	-0.177
25006	ENSMUSG00000023330.12	Dtwd1	chr2	+	126152140	126152577	126152140	126152508	126154545	126154860	25006	17,11	2,12	1,1	0,0	168	99	2.60278e-05	0.0011964	0.834,0.351	1.0,1.0	-0.407
25037	ENSMUSG00000001248.15	Gramd1a	chr7	-	31135519	31135739	31135557	31135739	31134413	31134517	25037	15,21	0,1	11,15	4,2	137	99	0.000803961	0.0200099	1.0,0.938	0.665,0.844	0.215
25039	ENSMUSG00000001248.15	Gramd1a	chr7	-	31135519	31135739	31135596	31135739	31134413	31134517	25039	51,96	76147	69,75	266260	176	99	4.76118e-07	4.24574e-05	0.274,0.269	0.127,0.14	0.138
25056	ENSMUSG00000001248.15	Gramd1a	chr7	-	31143512	31143564	31143548	31143564	31142807	31142888	25056	2,12	0,0	5,8	3,6	135	99	1.81649e-06	0.000131542	1.0,1.0	0.55,0.494	0.478
25066	ENSMUSG00000027498.14	Cstf1	chr2	+	172370680	172370860	172370680	172370813	172372928	172373129	25066	0,0	1,5	5,3	7,3	146	99	3.98871e-05	0.00170303	0.0,0.0	0.326,0.404	-0.365
25069	ENSMUSG00000027498.14	Cstf1	chr2	+	172370733	172371027	172370733	172370860	172372928	172373129	25069	91129	0,0	50,52	5,3	198	99	5.98475e-05	0.00240709	1.0,1.0	0.833,0.897	0.135
25117	ENSMUSG00000032743.15	D430042O09Rik	chr7	+	125707990	125708080	125707990	125708071	125752972	125753049	25117	3,2	0,0	1,0	0,4	108	99	0.000669141	0.0171905	1.0,1.0	1.0,0.0	0.5
25139	ENSMUSG00000029802.13	Abcg2	chr6	+	58635517	58635680	58635517	58635661	58655637	58655856	25139	8,2	3,4	0,0	3,1	118	99	3.70158e-06	0.000239689	0.691,0.296	0.0,0.0	0.493
25196	ENSMUSG00000077450.13	Rab11b	chr17	-	33760042	33760063	33760052	33760063	33749781	33749977	25196	3,7	1,2	0,0	2,2	109	99	2.69188e-07	2.60112e-05	0.732,0.761	0.0,0.0	0.746
25208	ENSMUSG00000039033.11	Tasp1	chr2	-	139947156	139947235	139947169	139947235	139910532	139910643	25208	68128	7,12	21,33	9,9	112	99	0.00197365	0.0396648	0.896,0.904	0.673,0.764	0.181
25254	ENSMUSG00000053510.12	Nrd1	chr4	+	109013509	109013842	109013509	109013840	109017626	109017696	25254	1,4	0,3	0,0	1,1	101	99	1.11916e-05	0.000598117	1.0,0.567	0.0,0.0	0.783
25280	ENSMUSG00000043716.13	Rpl7	chr1	-	16104010	16104384	16104369	16104384	16103509	16103684	25280	5,11	0,0	1,9	9,8	198	99	3.09183e-09	5.13449e-07	1.0,1.0	0.053,0.36	0.793
25361	ENSMUSG00000028403.15	Zdhhc21	chr4	-	82848303	82848375	82848330	82848375	82847616	82847739	25361	3,3	0,1	0,0	5,2	126	99	1.35995e-09	2.38457e-07	1.0,0.702	0.0,0.0	0.851
25662	ENSMUSG00000068921.14	Dap3	chr3	-	88950825	88951181	88951140	88951181	88942774	88942828	25662	0,0	3,3	4,1	2,3	198	99	0.000806797	0.0200645	0.0,0.0	0.5,0.143	-0.322
25685	ENSMUSG00000039671.18	Zmynd8	chr2	-	165883977	165884210	165884178	165884210	165875704	165875775	25685	9,11	14,45	1,0	21,15	198	99	2.73202e-05	0.00123937	0.243,0.109	0.023,0.0	0.164
25700	ENSMUSG00000029162.15	Khk	chr5	+	30924334	30924479	30924334	30924418	30924738	30924855	25700	3,2	1,5	0,0	1,2	160	99	0.000424995	0.0120259	0.65,0.198	0.0,0.0	0.424
25864	ENSMUSG00000039069.19	Mtg2	chr2	+	180084450	180084589	180084450	180084582	180085379	180085902	25864	62116	12,15	34,31	2,0	106	99	0.000481693	0.013281	0.828,0.878	0.941,1.0	-0.117
25866	ENSMUSG00000029165.17	Agbl5	chr5	+	30888955	30889447	30888955	30889081	30890119	30890380	25866	57,29	8,6	45,51	1,1	198	99	0.000108545	0.00398096	0.781,0.707	0.957,0.962	-0.216
25919	ENSMUSG00000002458.13	Rgs19	chr2	-	181693362	181693714	181693684	181693714	181691489	181691595	25919	10,7	1,5	6,1	0,0	198	99	4.5141e-05	0.00190391	0.833,0.412	1.0,1.0	-0.378
25932	ENSMUSG00000027637.3	Rab5if	chr2	+	156863138	156863632	156863138	156863616	156865256	156866987	25932	10,12	6,1	9,9	1,0	115	99	0.00251014	0.0475965	0.589,0.912	0.886,1.0	-0.193
26034	ENSMUSG00000094410.7	Gm38394	chr1	-	133655344	133661318	133661255	133661318	133653972	133654032	26034	86,82	7,12	25,28	24,15	198	99	1.07985e-07	1.17843e-05	0.86,0.774	0.342,0.483	0.404
26035	ENSMUSG00000094410.7	Gm38394	chr1	-	133655344	133661318	133661260	133661318	133653972	133654032	26035	86,82	1,0	25,28	4,2	198	99	0.00050453	0.0137641	0.977,1.0	0.758,0.875	0.172
26038	ENSMUSG00000027881.14	Prpf38b	chr3	-	108907772	108907981	108907931	108907981	108905110	108905334	26038	20,28	0,0	18,23	4,9	198	99	2.26253e-07	2.22763e-05	1.0,1.0	0.692,0.561	0.373
26039	ENSMUSG00000027881.14	Prpf38b	chr3	-	108907772	108907827	108907786	108907827	108905917	108905988	26039	8,6	14,14	3,2	1,0	113	99	0.000197139	0.00646994	0.334,0.273	0.724,1.0	-0.558
26042	ENSMUSG00000039849.5	Pcif1	chr2	+	164879303	164879661	164879303	164879489	164882774	164883199	26042	26,21	245419	284195	730586	198	99	0	0	0.05,0.024	0.163,0.143	-0.116
26134	ENSMUSG00000029513.14	Prkab1	chr5	-	116020003	116020463	116020373	116020463	116017947	116018081	26134	207357	12,22	119,96	25,10	198	99	0.00131263	0.0291592	0.896,0.89	0.704,0.828	0.127
26218	ENSMUSG00000028639.14	Ybx1	chr4	-	119285036	119285142	119285108	119285142	119282272	119282448	26218	22,24	21,40	28,25	570515	171	99	0	0	0.378,0.258	0.028,0.027	0.29
26261	ENSMUSG00000029467.15	Atp2a2	chr5	-	122457295	122457414	122457302	122457414	122453513	122454304	26261	48,70	13,31	26,17	0,3	106	99	0.0003075	0.0092818	0.775,0.678	1.0,0.841	-0.194
26288	ENSMUSG00000036980.13	Taf6	chr5	-	138187062	138187205	138187169	138187205	138184331	138184547	26288	115180	220314	27,38	138152	198	99	3.70606e-07	3.42218e-05	0.207,0.223	0.089,0.111	0.115
26297	ENSMUSG00000036980.13	Taf6	chr5	-	138187369	138187451	138187390	138187451	138184331	138184547	26297	3,12	10,16	1,0	2,5	120	99	0.00206508	0.0410324	0.198,0.382	0.292,0.0	0.144
26300	ENSMUSG00000022536.14	Glyr1	chr16	-	5048229	5048353	5048313	5048353	5047733	5047813	26300	0,0	5,1	2,1	0,0	183	99	1.28133e-09	2.29836e-07	0.0,0.0	1.0,1.0	-1
26324	ENSMUSG00000029475.17	Kdm2b	chr5	-	122988867	122989092	122989050	122989092	122987661	122987806	26324	54,63	5,2	60,41	0,0	198	99	0.00123836	0.027786	0.844,0.94	1.0,1.0	-0.108
26331	ENSMUSG00000031352.10	Hccs	chrX	-	169319782	169320280	169320114	169320280	169319437	169319590	26331	68,56	71,89	110100	32,27	198	99	1.82632e-12	5.75769e-10	0.324,0.239	0.632,0.649	-0.359
26338	ENSMUSG00000023249.15	Parp3	chr9	-	106473070	106473519	106473432	106473519	106471759	106471915	26338	3,7	7,3	3,1	0,0	198	99	1.34357e-07	1.4215e-05	0.176,0.538	1.0,1.0	-0.643
26421	ENSMUSG00000049971.17	Glt1d1	chr5	+	127663678	127664169	127663678	127664076	127664651	127664708	26421	1,1	1,6	6,1	2,0	192	99	0.001115	0.025645	0.34,0.079	0.607,1.0	-0.594
26422	ENSMUSG00000049971.17	Glt1d1	chr5	+	127663678	127664176	127663678	127664076	127664651	127664708	26422	4,5	1,6	21,10	2,0	198	99	0.000939497	0.022608	0.667,0.294	0.84,1.0	-0.439
26449	ENSMUSG00000034211.14	Mrps17	chr5	+	129715496	129715828	129715496	129715549	129716726	129716866	26449	30,23	25,26	55,50	5,5	198	99	1.74073e-11	4.68361e-09	0.375,0.307	0.846,0.833	-0.498
26462	ENSMUSG00000034211.14	Mrps17	chr5	+	129715496	129715828	129715496	129715794	129716726	129716866	26462	23,18	19,37	54,46	20,16	133	99	0.000306674	0.00926583	0.474,0.266	0.668,0.682	-0.305
26463	ENSMUSG00000034211.14	Mrps17	chr5	+	129715496	129715902	129715496	129715794	129716726	129716866	26463	22,45	19,37	6,8	20,16	198	99	0.00104313	0.0244422	0.367,0.378	0.13,0.2	0.207
26464	ENSMUSG00000034211.14	Mrps17	chr5	+	129715496	129715923	129715496	129715794	129716726	129716866	26464	22,44	19,37	7,8	20,16	198	99	0.00207939	0.0412062	0.367,0.373	0.149,0.2	0.196
26467	ENSMUSG00000034211.14	Mrps17	chr5	+	129715496	129715984	129715496	129715794	129716726	129716866	26467	23,44	19,37	6,8	20,16	198	99	0.00103003	0.0242079	0.377,0.373	0.13,0.2	0.21
26468	ENSMUSG00000034211.14	Mrps17	chr5	+	129715496	129715902	129715496	129715828	129716726	129716866	26468	22,45	23,18	6,8	54,46	173	99	3.56314e-09	5.76213e-07	0.354,0.589	0.06,0.091	0.396
26469	ENSMUSG00000034211.14	Mrps17	chr5	+	129715496	129715923	129715496	129715828	129716726	129716866	26469	22,44	23,18	7,8	54,46	194	99	6.04402e-09	8.98286e-07	0.328,0.555	0.062,0.082	0.369
26470	ENSMUSG00000034211.14	Mrps17	chr5	+	129715496	129715945	129715496	129715828	129716726	129716866	26470	27,51	23,18	10,11	54,46	198	99	8.47775e-09	1.21954e-06	0.37,0.586	0.085,0.107	0.382
26471	ENSMUSG00000034211.14	Mrps17	chr5	+	129715496	129715961	129715496	129715828	129716726	129716866	26471	38,72	23,18	23,19	54,46	198	99	1.83599e-07	1.86655e-05	0.452,0.667	0.176,0.171	0.386
26472	ENSMUSG00000034211.14	Mrps17	chr5	+	129715496	129715984	129715496	129715828	129716726	129716866	26472	23,44	23,18	6,8	54,46	198	99	9.85092e-10	1.80857e-07	0.333,0.55	0.053,0.08	0.375
26485	ENSMUSG00000034211.14	Mrps17	chr5	+	129715557	129715910	129715557	129715828	129716726	129716866	26485	240375	23,18	113,89	54,46	181	99	0	0	0.851,0.919	0.534,0.514	0.361
26502	ENSMUSG00000034211.14	Mrps17	chr5	+	129715683	129715858	129715683	129715794	129716726	129716866	26502	51,71	19,37	13,12	20,16	163	99	0.000249253	0.00785801	0.62,0.538	0.283,0.313	0.281
26505	ENSMUSG00000034211.14	Mrps17	chr5	+	129715683	129715858	129715683	129715828	129716726	129716866	26505	51,71	23,18	13,12	54,46	129	99	2.22045e-16	1.05004e-13	0.63,0.752	0.156,0.167	0.53
26506	ENSMUSG00000034211.14	Mrps17	chr5	+	129715683	129715912	129715683	129715828	129716726	129716866	26506	40,84	23,18	17,18	54,46	183	99	7.75654e-09	1.13657e-06	0.485,0.716	0.146,0.175	0.44
26507	ENSMUSG00000034211.14	Mrps17	chr5	+	129715683	129715941	129715683	129715828	129716726	129716866	26507	55,92	23,18	21,25	54,46	198	99	8.33181e-11	1.95522e-08	0.545,0.719	0.163,0.214	0.444
26736	ENSMUSG00000004846.10	Plod3	chr5	+	136990750	136991084	136990750	136991082	136991330	136991441	26736	1,0	0,3	2,4	0,0	101	99	0.00183303	0.0375367	1.0,0.0	1.0,1.0	-0.5
26980	ENSMUSG00000026199.17	Ankzf1	chr1	+	75192159	75192677	75192159	75192622	75194177	75194284	26980	120147	5,7	30,35	8,6	154	99	0.000522327	0.0141127	0.939,0.931	0.707,0.789	0.187
27029	ENSMUSG00000025574.13	Tk1	chr11	-	117825706	117825837	117825713	117825837	117824670	117824781	27029	20,35	9,7	5,2	7,8	106	99	0.000336663	0.0100359	0.675,0.824	0.4,0.189	0.455
27077	ENSMUSG00000029642.11	Polr1d	chr5	+	147098648	147099046	147098648	147098935	147101228	147101303	27077	5,12	1,0	3,0	2,2	198	99	3.59476e-05	0.00157229	0.714,1.0	0.429,0.0	0.642
27105	ENSMUSG00000066551.12	Hmgb1	chr5	-	149051267	149051616	149051278	149051616	149050587	149050751	27105	9,13	81122	18,6	29,27	110	99	0.00115201	0.026399	0.091,0.088	0.358,0.167	-0.173
27151	ENSMUSG00000036880.10	Acaa2	chr18	+	74796706	74796956	74796706	74796940	74798311	74798487	27151	3,0	2,2	3,2	0,0	115	99	5.8007e-05	0.00234515	0.564,0.0	1.0,1.0	-0.718
27155	ENSMUSG00000040520.7	Manea	chr4	-	26346424	26346891	26346774	26346891	26340750	26340998	27155	54104	0,4	31,32	4,5	198	99	0.00237339	0.0457823	1.0,0.929	0.795,0.762	0.186
27249	ENSMUSG00000021067.8	Sav1	chr12	-	69986540	69987002	69986708	69987002	69984208	69984652	27249	1,7	6,11	1,0	11,8	198	99	0.000944585	0.022713	0.077,0.241	0.043,0.0	0.138
27295	ENSMUSG00000022297.15	Fzd6	chr15	+	39006279	39006650	39006279	39006583	39007224	39007718	27295	7,2	0,1	1,1	1,3	166	99	5.23626e-05	0.00215605	1.0,0.544	0.374,0.166	0.502
27331	ENSMUSG00000009741.15	Ubp1	chr9	+	113955962	113956103	113955962	113956074	113956706	113956813	27331	5,4	7,7	2,2	1,0	128	99	0.00105823	0.0247034	0.356,0.307	0.607,1.0	-0.472
27333	ENSMUSG00000009741.15	Ubp1	chr9	+	113955962	113956449	113955962	113956074	113956706	113956813	27333	1,0	7,7	2,2	1,0	198	99	1.45192e-05	0.000734457	0.067,0.0	0.5,1.0	-0.717
27336	ENSMUSG00000009741.15	Ubp1	chr9	+	113955962	113956449	113955962	113956442	113956706	113956813	27336	1,0	8,10	2,2	2,1	106	99	0.000518935	0.0140473	0.105,0.0	0.483,0.651	-0.514
27342	ENSMUSG00000009741.15	Ubp1	chr9	+	113969224	113969698	113969224	113969416	113970141	113970260	27342	7,12	103161	10,13	35,27	198	99	8.30737e-06	0.000477498	0.033,0.036	0.125,0.194	-0.125
27347	ENSMUSG00000018849.6	Wwc1	chr11	-	35889259	35889406	35889289	35889406	35888062	35888136	27347	94130	4,2	23,22	12,4	129	99	1.16269e-06	9.18704e-05	0.947,0.98	0.595,0.808	0.262
27361	ENSMUSG00000074165.10	Zfp788	chr7	+	41634647	41634745	41634647	41634710	41647482	41647617	27361	2,6	2,6	0,1	4,5	134	99	0.000281235	0.0086479	0.425,0.425	0.0,0.129	0.36
27363	ENSMUSG00000074165.10	Zfp788	chr7	+	41634647	41634899	41634647	41634745	41647490	41647617	27363	1,3	0,7	1,2	0,0	198	99	0.000871186	0.0212593	1.0,0.176	1.0,1.0	-0.412
27372	ENSMUSG00000029767.16	Calu	chr6	+	29361297	29361753	29361297	29361487	29366039	29366206	27372	12261797	11681772	954879	556516	198	99	4.64228e-06	0.000292118	0.344,0.336	0.462,0.46	-0.121
27387	ENSMUSG00000044950.7	Pwwp2a	chr11	+	43705242	43705567	43705242	43705477	43720220	43721491	27387	5,5	53,56	8,13	22,22	189	99	8.06141e-05	0.00309858	0.047,0.045	0.16,0.236	-0.152
27489	ENSMUSG00000008668.15	Rps18	chr17	-	33955265	33955652	33955291	33955652	33955077	33955176	27489	5,16	0,1	13,6	17,22	125	99	1.32343e-09	2.34425e-07	1.0,0.927	0.377,0.178	0.686
27504	ENSMUSG00000029823.16	Luc7l2	chr6	+	38554979	38555236	38554979	38555063	38557851	38557918	27504	6,8	1,9	7,2	0,0	198	99	2.91441e-06	0.00019554	0.75,0.308	1.0,1.0	-0.471
27506	ENSMUSG00000029823.16	Luc7l2	chr6	+	38554979	38555236	38554979	38555063	38570509	38570604	27506	6,8	1,0	7,2	13,2	198	99	2.57978e-06	0.000175038	0.75,1.0	0.212,0.333	0.603
27526	ENSMUSG00000002413.15	Braf	chr6	-	39666236	39666349	39666240	39666349	39665003	39665106	27526	8,3	1,0	9,3	8,1	103	99	0.000401468	0.011538	0.885,1.0	0.52,0.742	0.311
27548	ENSMUSG00000117748.1	Chtf8	chr8	-	106886919	106887356	106887300	106887356	106886304	106886526	27548	9001203	104185	148152	48,39	198	99	1.38083e-05	0.000710001	0.812,0.765	0.607,0.661	0.154
27637	ENSMUSG00000068039.13	Tcp1	chr17	+	12918042	12918449	12918042	12918171	12919814	12920228	27637	116184	5,12	248192	147145	198	99	0	0	0.921,0.885	0.458,0.398	0.475
27642	ENSMUSG00000034566.10	Atp5h	chr11	-	115418298	115418453	115418385	115418453	115416852	115416924	27642	13,8	0,2	6,8	12,10	186	99	1.30563e-05	0.000679794	1.0,0.68	0.21,0.299	0.586
27648	ENSMUSG00000074909.5	Ranbp6	chr19	-	29812755	29812954	29812814	29812954	29810922	29811699	27648	0,3	1,6	1,2	0,1	158	99	0.00166647	0.0349544	0.0,0.239	1.0,0.556	-0.659
27665	ENSMUSG00000032182.15	Yipf2	chr9	-	21592295	21592772	21592736	21592772	21592060	21592218	27665	24,47	6,7	19,10	0,1	198	99	0.000669203	0.0171905	0.667,0.77	1.0,0.833	-0.198
27704	ENSMUSG00000063108.15	Zfp26	chr9	-	20459915	20459989	20459979	20459989	20459546	20459661	27704	7,1	5,0	2,2	0,0	163	99	0.00110652	0.0254876	0.46,1.0	1.0,1.0	-0.27
27711	ENSMUSG00000092417.3	Gpank1	chr17	+	35121481	35121711	35121481	35121550	35123052	35123659	27711	35,45	44,54	44,29	93,92	198	99	0.00131996	0.0292595	0.285,0.294	0.191,0.136	0.126
27712	ENSMUSG00000092417.3	Gpank1	chr17	+	35121481	35121915	35121481	35121550	35123052	35123659	27712	34,47	44,54	42,28	93,92	198	99	0.000584439	0.0154453	0.279,0.303	0.184,0.132	0.133
27713	ENSMUSG00000092417.3	Gpank1	chr17	+	35121481	35121968	35121481	35121550	35123052	35123659	27713	36,45	44,54	42,28	93,92	198	99	0.000571131	0.0151853	0.29,0.294	0.184,0.132	0.134
27813	ENSMUSG00000034807.9	Colgalt1	chr8	+	71622702	71623144	71622702	71622830	71623492	71624911	27813	23,32	18,24	24,12	4,2	198	99	0.000357716	0.0105526	0.39,0.4	0.75,0.75	-0.355
27829	ENSMUSG00000027810.14	Eif2a	chr3	+	58526302	58526732	58526302	58526708	58531086	58531156	27829	0,0	1,2	1,1	0,0	123	99	9.69145e-09	1.37491e-06	0.0,0.0	1.0,1.0	-1
27850	ENSMUSG00000110105.1	Gm45844	chr7	-	7267476	7267918	7267779	7267918	7267218	7267305	27850	5,13	3,3	1,1	0,0	198	99	1.49352e-05	0.000753058	0.455,0.684	1.0,1.0	-0.43
27860	ENSMUSG00000006215.12	Zbtb17	chr4	+	141448042	141448230	141448042	141448136	141461768	141461975	27860	0,0	1,1	1,2	0,0	193	99	1.18189e-08	1.61083e-06	0.0,0.0	1.0,1.0	-1
27898	ENSMUSG00000005069.12	Pex5	chr6	-	124414006	124414355	124414286	124414355	124413568	124413701	27898	249374	9,13	325310	71,56	198	99	2.45359e-14	9.81783e-12	0.933,0.935	0.696,0.735	0.219
27921	ENSMUSG00000053470.13	Kdm3a	chr6	-	71632731	71632905	71632862	71632905	71632496	71632579	27921	4,4	2,5	2,4	0,0	198	99	7.26137e-08	8.3629e-06	0.5,0.286	1.0,1.0	-0.607
27964	ENSMUSG00000035776.14	Cd99l2	chrX	-	71440885	71441145	71441073	71441145	71440524	71440611	27964	8,6	137206	36,46	73,51	198	99	0	0	0.028,0.014	0.198,0.311	-0.234
27997	ENSMUSG00000032702.16	Kank1	chr19	+	25236974	25237317	25236974	25236992	25274747	25274834	27997	12,21	5,6	0,2	1,4	198	99	0.00105276	0.0245941	0.545,0.636	0.0,0.2	0.491
28042	ENSMUSG00000068328.9	Aup1	chr6	+	83055519	83055970	83055519	83055690	83056367	83056385	28042	4,7	1,2	6,4	0,0	198	99	0.0024037	0.0462374	0.667,0.636	1.0,1.0	-0.349
28069	ENSMUSG00000080115.3	Eef1akmt3	chr10	-	127040987	127041099	127041042	127041099	127031003	127033314	28069	10,18	3,2	10,9	0,0	154	99	0.000950023	0.0228262	0.682,0.853	1.0,1.0	-0.232
28104	ENSMUSG00000021666.16	Gfm2	chr13	+	97151634	97151755	97151634	97151724	97153227	97153316	28104	6,0	8,8	0,0	6,4	130	99	0.00147112	0.0318634	0.364,0.0	0.0,0.0	0.182
28146	ENSMUSG00000030145.14	Zfp248	chr6	-	118454285	118454738	118454676	118454738	118453845	118453887	28146	1,1	21,53	8,3	20,19	198	99	0.000121548	0.00434055	0.023,0.009	0.167,0.073	-0.104
28159	ENSMUSG00000002010.17	Idh3g	chrX	-	73781911	73782309	73782297	73782309	73781676	73781789	28159	11,17	1,5	16,11	1,0	198	99	0.00177041	0.0367151	0.846,0.63	0.889,1.0	-0.207
28190	ENSMUSG00000002871.14	Tpra1	chr6	+	88910370	88910650	88910370	88910401	88911682	88912231	28190	11,12	0,0	11,7	2,7	198	99	1.64815e-06	0.000121608	1.0,1.0	0.733,0.333	0.467
28218	ENSMUSG00000066037.14	Hnrnpr	chr4	+	136327220	136327419	136327220	136327412	136332397	136332603	28218	0,0	1,1	2,1	0,0	106	99	1.14361e-08	1.57934e-06	0.0,0.0	1.0,1.0	-1
28228	ENSMUSG00000032776.9	Mctp2	chr7	-	72110515	72110583	72110532	72110583	72103193	72103253	28228	4,17	15,15	0,0	1,3	116	99	6.90303e-05	0.00272033	0.185,0.492	0.0,0.0	0.339
28242	ENSMUSG00000032413.12	Rasa2	chr9	-	96552984	96553186	96553112	96553186	96552302	96552409	28242	1,1	39,80	4,3	7,17	198	99	0.000565487	0.0150979	0.013,0.006	0.222,0.081	-0.142
28269	ENSMUSG00000030061.16	Uba3	chr6	-	97204914	97205347	97205102	97205347	97203473	97203594	28269	13,11	12,7	0,1	6,3	198	99	3.44873e-05	0.0015139	0.351,0.44	0.0,0.143	0.324
28380	ENSMUSG00000051256.10	Jagn1	chr6	+	113442568	113442797	113442568	113442629	113447257	113448229	28380	211320	15,17	29,41	7,12	198	99	3.60152e-05	0.00157229	0.876,0.904	0.674,0.631	0.237
28410	ENSMUSG00000110234.2	Gm45799	chr7	+	105640563	105640868	105640563	105640622	105641027	105641228	28410	20,11	13,20	32,41	1,0	198	99	2.75668e-13	1.01222e-10	0.435,0.216	0.941,1.0	-0.645
28411	ENSMUSG00000110234.2	Gm45799	chr7	+	105640563	105640891	105640563	105640622	105641027	105641228	28411	18,11	13,20	33,40	1,0	198	99	4.35207e-14	1.69791e-11	0.409,0.216	0.943,1.0	-0.659
28508	ENSMUSG00000058979.7	Hdhd5	chr6	-	120530857	120531319	120531166	120531319	120523405	120523609	28508	9,12	63,65	9,10	8,6	198	99	2.50152e-06	0.000171271	0.067,0.085	0.36,0.455	-0.331
28519	ENSMUSG00000106447.1	Gm42957	chr3	+	96635473	96635743	96635473	96635500	96636673	96636789	28519	187275	10,5	103,96	15,17	198	99	7.44743e-07	6.14925e-05	0.903,0.965	0.774,0.738	0.178
28524	ENSMUSG00000027649.15	Ctnnbl1	chr2	+	157774410	157774700	157774410	157774602	157779811	157779918	28524	2,8	10,15	0,0	4,6	197	99	0.000291568	0.00885228	0.091,0.211	0.0,0.0	0.151
28544	ENSMUSG00000022248.14	Rad1	chr15	+	10486017	10486264	10486017	10486026	10486452	10486716	28544	167270	4,0	47,43	5,6	198	99	3.96386e-06	0.000254057	0.954,1.0	0.825,0.782	0.173
28546	ENSMUSG00000022248.14	Rad1	chr15	+	10486017	10486264	10486017	10486072	10486452	10486716	28546	187300	0,10	68,54	3,11	198	99	0.000632359	0.0164238	1.0,0.938	0.919,0.711	0.154
28547	ENSMUSG00000022248.14	Rad1	chr15	+	10486017	10486264	10486017	10486075	10486452	10486716	28547	187300	4,5	68,54	13,5	198	99	1.95707e-06	0.000139776	0.959,0.968	0.723,0.844	0.18
28584	ENSMUSG00000030127.15	Cops7a	chr6	-	124965151	124965448	124965284	124965448	124964723	124964928	28584	8,23	25,52	9,18	5,2	198	99	9.45704e-05	0.00356478	0.138,0.181	0.474,0.818	-0.486
28590	ENSMUSG00000030127.15	Cops7a	chr6	-	124965186	124965448	124965284	124965448	124964723	124964928	28590	6,12	25,52	10,12	5,2	197	99	1.30392e-06	9.97463e-05	0.108,0.104	0.501,0.751	-0.52
28635	ENSMUSG00000057666.18	Gapdh	chr6	-	125165096	125165311	125165154	125165311	125163134	125163436	28635	329565	28,33	438407	80,67	157	99	3.95274e-07	3.57591e-05	0.881,0.915	0.775,0.793	0.114
28688	ENSMUSG00000020964.14	Sel1l	chr12	-	91814675	91815139	91814973	91815139	91813831	91814004	28688	19,20	3,5	10,1	0,0	198	99	6.51255e-05	0.00258934	0.76,0.667	1.0,1.0	-0.286
28700	ENSMUSG00000030346.16	Rad51ap1	chr6	-	126939380	126939546	126939507	126939546	126935952	126936008	28700	0,3	4,8	1,3	0,0	198	99	7.14343e-10	1.36781e-07	0.0,0.158	1.0,1.0	-0.921
28717	ENSMUSG00000027411.17	Vps16	chr2	+	130441607	130441908	130441607	130441705	130442172	130442250	28717	3,5	0,0	0,2	4,0	198	99	0.00107214	0.0248588	1.0,1.0	0.0,1.0	0.5
28723	ENSMUSG00000002395.14	Use1	chr8	+	71368849	71369305	71368849	71368877	71369526	71369732	28723	38,81	7,3	72,51	1,0	198	99	0.000259497	0.00811538	0.731,0.931	0.973,1.0	-0.155
28731	ENSMUSG00000064181.6	Rab3ip	chr10	-	116937382	116937655	116937396	116937655	116919573	116919651	28731	4,9	8,10	5,5	82,84	113	99	3.13388e-06	0.000207668	0.305,0.441	0.051,0.05	0.323
28879	ENSMUSG00000063316.13	Rpl27	chr11	+	101442297	101442650	101442297	101442402	101442722	101442805	28879	13,27	3,3	1,7	12,20	198	99	1.6656e-10	3.7632e-08	0.684,0.818	0.04,0.149	0.656
28901	ENSMUSG00000030216.12	Wbp11	chr6	-	136828015	136828135	136828021	136828135	136826000	136826109	28901	0,0	3,7	4,4	11,4	105	99	1.70414e-05	0.000848004	0.0,0.0	0.255,0.485	-0.37
28955	ENSMUSG00000024309.15	Pfdn6	chr17	-	33940189	33940310	33940296	33940310	33940023	33940105	28955	0,0	4,1	1,1	0,0	198	99	4.62222e-09	7.17732e-07	0.0,0.0	1.0,1.0	-1
28965	ENSMUSG00000024271.8	Elp2	chr18	+	24619077	24619499	24619077	24619178	24622078	24622237	28965	9,14	9,12	12,7	1,0	198	99	1.60026e-06	0.000118919	0.333,0.368	0.857,1.0	-0.578
28974	ENSMUSG00000040242.14	Fgfr1op2	chr6	+	146592633	146592951	146592633	146592747	146595175	146595289	28974	138187	157251	164137	30,19	198	99	0	0	0.305,0.271	0.732,0.783	-0.47
29040	ENSMUSG00000006333.14	Rps9	chr7	+	3703992	3704149	3703992	3704113	3704326	3704448	29040	6,6	2,4	6,7	0,1	135	99	0.00100798	0.0238086	0.688,0.524	1.0,0.837	-0.312
29142	ENSMUSG00000049739.10	Zfp646	chr7	+	127876795	127877212	127876795	127877123	127877902	127878107	29142	19,30	3,5	16,7	0,0	188	99	8.17335e-05	0.00313774	0.769,0.76	1.0,1.0	-0.236
29146	ENSMUSG00000031060.16	Rbm10	chrX	+	20617502	20618082	20617502	20617505	20619973	20620114	29146	3,7	5,4	0,1	3,7	198	99	0.00019495	0.00641158	0.231,0.467	0.0,0.067	0.316
29158	ENSMUSG00000000605.9	Clcn4	chr7	-	7299199	7299533	7299240	7299533	7298691	7298836	29158	6,2	10,11	0,0	2,3	140	99	0.000288246	0.00878558	0.298,0.114	0.0,0.0	0.206
29168	ENSMUSG00000023883.13	Phf10	chr17	-	14946312	14946757	14946654	14946757	14945013	14945184	29168	12,27	7,17	13,10	1,1	198	99	0.000420979	0.0119338	0.462,0.443	0.867,0.833	-0.397
29192	ENSMUSG00000032594.11	Ip6k1	chr9	+	108044726	108045022	108044726	108044900	108045245	108045313	29192	85131	33,48	135136	11,14	198	99	1.35658e-08	1.80941e-06	0.563,0.577	0.86,0.829	-0.275
29195	ENSMUSG00000021377.15	Dek	chr13	-	47101684	47101997	47101972	47101997	47100173	47100268	29195	20,38	0,2	54,49	20,24	198	99	1.38707e-07	1.46177e-05	1.0,0.905	0.574,0.505	0.413
29197	ENSMUSG00000021377.15	Dek	chr13	-	47105835	47106154	47106085	47106154	47105571	47105737	29197	5,6	2,2	7,10	0,0	198	99	0.000252517	0.00793688	0.556,0.6	1.0,1.0	-0.422
29257	ENSMUSG00000004500.9	Zfp324	chr7	+	12968794	12968968	12968794	12968884	12969363	12969480	29257	6,7	0,0	0,1	2,0	183	99	0.00151505	0.0324812	1.0,1.0	0.0,1.0	0.5
29277	ENSMUSG00000056952.13	Tatdn2	chr6	+	113709459	113709919	113709459	113709643	113710040	113710449	29277	93156	301463	211196	237197	198	99	5.02931e-14	1.9379e-11	0.134,0.144	0.308,0.332	-0.181
29357	ENSMUSG00000027667.13	Zfp639	chr3	+	32510534	32510967	32510534	32510732	32513000	32513192	29357	15,1	76,90	19,5	12,6	198	99	5.64804e-09	8.516e-07	0.09,0.006	0.442,0.294	-0.32
29429	ENSMUSG00000000131.15	Xpo6	chr7	-	126102926	126103190	126103078	126103190	126102345	126102390	29429	0,3	19,6	13,6	11,6	198	99	0.000106883	0.00393296	0.0,0.2	0.371,0.333	-0.252
29439	ENSMUSG00000031774.8	Fam192a	chr8	-	94601496	94601701	94601634	94601701	94589230	94589407	29439	304444	9,6	146,96	19,12	198	99	1.28356e-08	1.73426e-06	0.944,0.974	0.793,0.8	0.162
29454	ENSMUSG00000039701.11	Usp53	chr3	-	122983956	122984323	122984281	122984323	122982684	122982709	29454	1,2	3,1	1,1	0,0	198	99	5.65165e-06	0.000345193	0.143,0.5	1.0,1.0	-0.678
29459	ENSMUSG00000039701.11	Usp53	chr3	-	122984021	122984510	122984281	122984510	122982684	122982847	29459	0,0	4,18	1,3	0,0	198	99	1.64137e-10	3.7632e-08	0.0,0.0	1.0,1.0	-1
29561	ENSMUSG00000040488.17	Ltbp4	chr7	-	27337387	27337692	27337427	27337692	27335670	27335711	29561	0,0	9,9	5,1	10,5	139	99	0.000258369	0.00809634	0.0,0.0	0.263,0.125	-0.194
29610	ENSMUSG00000037563.15	Rps16	chr7	+	28350651	28350877	28350651	28350853	28350991	28351093	29610	0,0	10,13	4,8	49,37	123	99	0.000735088	0.0185172	0.0,0.0	0.062,0.148	-0.105
29642	ENSMUSG00000037552.17	Plekhg2	chr7	-	28370862	28370928	28370877	28370928	28370237	28370494	29642	1,5	2,5	0,0	2,4	114	99	2.13919e-05	0.00102089	0.303,0.465	0.0,0.0	0.384
29679	ENSMUSG00000026456.18	Cyb5r1	chr1	+	134406561	134406966	134406561	134406804	134407045	134407152	29679	1,3	2,2	1,1	0,0	198	99	1.33003e-05	0.000688418	0.2,0.429	1.0,1.0	-0.685
29759	ENSMUSG00000030584.14	Dpf1	chr7	+	29308011	29308500	29308011	29308101	29309410	29309571	29759	4,5	9,2	0,0	6,14	198	99	1.84096e-05	0.000904851	0.182,0.556	0.0,0.0	0.369
29760	ENSMUSG00000030584.14	Dpf1	chr7	+	29308011	29308500	29308011	29308107	29309410	29309571	29760	4,5	2,3	0,0	4,10	198	99	8.19985e-07	6.69962e-05	0.5,0.455	0.0,0.0	0.478
29769	ENSMUSG00000062040.14	Zfp27	chr7	-	29903899	29904059	29903904	29904059	29900237	29900338	29769	36,46	6,11	18,9	0,0	104	99	3.37564e-05	0.0014881	0.851,0.799	1.0,1.0	-0.175
29783	ENSMUSG00000099689.6	Zfp383	chr7	+	29908516	29908908	29908516	29908812	29910182	29910247	29783	2,3	5,2	1,3	0,1	195	99	0.00207376	0.0411366	0.169,0.432	1.0,0.604	-0.502
29853	ENSMUSG00000021764.8	Ndufs4	chr13	-	114387629	114388063	114387958	114388063	114316856	114317029	29853	16,23	43,66	26,17	397303	198	99	1.95179e-10	4.28996e-08	0.157,0.148	0.032,0.027	0.123
29893	ENSMUSG00000038535.17	Zfp280d	chr9	+	72301683	72302006	72301683	72301766	72307950	72308068	29893	94121	5,8	84,92	0,0	198	99	2.64268e-05	0.00121117	0.904,0.883	1.0,1.0	-0.107
29897	ENSMUSG00000038535.17	Zfp280d	chr9	+	72329509	72329817	72329509	72329610	72330865	72331173	29897	21,21	0,0	15,14	1,5	198	99	5.44613e-05	0.0022307	1.0,1.0	0.882,0.583	0.268
29898	ENSMUSG00000038535.17	Zfp280d	chr9	+	72329509	72329821	72329509	72329610	72330865	72331173	29898	21,24	0,0	13,14	1,5	198	99	3.8595e-05	0.00165239	1.0,1.0	0.867,0.583	0.275
29982	ENSMUSG00000046364.14	Rpl27a	chr7	+	109519584	109520023	109519584	109519648	109520467	109520642	29982	66,84	17,33	71,60	85,51	198	99	2.56998e-06	0.000175038	0.66,0.56	0.295,0.37	0.278
29999	ENSMUSG00000051444.9	Bbs12	chr3	+	37312553	37312941	37312553	37312585	37319049	37321450	29999	23,35	46,61	0,3	16,12	198	99	0.000202375	0.00660705	0.2,0.223	0.0,0.111	0.156
30045	ENSMUSG00000001755.12	Coasy	chr11	+	101082617	101083105	101082617	101082690	101084315	101084530	30045	55,72	49,70	43,39	15,6	198	99	6.50419e-05	0.00258932	0.359,0.34	0.589,0.765	-0.328
30060	ENSMUSG00000032067.6	Pts	chr9	-	50528145	50528646	50528289	50528646	50526869	50526949	30060	20,12	6,4	10,13	0,0	198	99	4.94413e-06	0.000305567	0.625,0.6	1.0,1.0	-0.387
30079	ENSMUSG00000004394.12	Tmed4	chr11	-	6274658	6274865	6274680	6274865	6274397	6274498	30079	51,64	13,25	50,37	5,1	121	99	5.73361e-05	0.00232405	0.762,0.677	0.891,0.968	-0.21
30105	ENSMUSG00000011096.17	Akt1s1	chr7	+	44850006	44850431	44850006	44850296	44852570	44852959	30105	3,1	8,6	4,3	1,1	198	99	0.00194752	0.0393171	0.158,0.077	0.667,0.6	-0.516
30127	ENSMUSG00000003429.11	Rps11	chr7	-	45124027	45124335	45124099	45124335	45123418	45123550	30127	0,6	2,5	0,0	5,8	171	99	0.00108941	0.0251677	0.0,0.41	0.0,0.0	0.205
30163	ENSMUSG00000030796.17	Tead2	chr7	+	45215752	45216038	45215752	45215870	45217212	45217450	30163	1,1	2,5	4,3	2,0	198	99	0.00106109	0.0247516	0.2,0.091	0.5,1.0	-0.605
30174	ENSMUSG00000030796.17	Tead2	chr7	+	45215790	45216266	45215790	45216020	45217212	45217450	30174	3,6	3,9	0,1	6,8	198	99	0.000202843	0.00661541	0.333,0.25	0.0,0.059	0.262
30175	ENSMUSG00000030796.17	Tead2	chr7	+	45215790	45216266	45215790	45216038	45217212	45217450	30175	3,6	0,0	0,1	1,2	198	99	1.13788e-06	9.03673e-05	1.0,1.0	0.0,0.2	0.9
30179	ENSMUSG00000030796.17	Tead2	chr7	+	45215822	45216020	45215822	45215874	45217212	45217450	30179	4,10	22,41	9,9	10,11	198	99	0.00249249	0.0474036	0.083,0.109	0.31,0.29	-0.204
30180	ENSMUSG00000030796.17	Tead2	chr7	+	45215822	45216038	45215822	45215874	45217212	45217450	30180	1,1	22,41	4,3	10,11	198	99	0.00107285	0.0248588	0.022,0.012	0.167,0.12	-0.127
30195	ENSMUSG00000063511.11	Snrnp70	chr7	-	45383112	45383184	45383124	45383184	45380716	45380818	30195	4,15	3,12	2,1	5,9	111	99	0.00181136	0.037268	0.543,0.527	0.263,0.09	0.359
30205	ENSMUSG00000050708.16	Ftl1	chr7	-	45458912	45459122	45459089	45459122	45458534	45458660	30205	5,11	0,0	45,34	2,4	198	99	0.00204242	0.0406544	1.0,1.0	0.918,0.81	0.136
30208	ENSMUSG00000050708.16	Ftl1	chr7	-	45458962	45459122	45459089	45459122	45458534	45458660	30208	4,11	0,0	45,33	2,4	198	99	0.00187541	0.0382072	1.0,1.0	0.918,0.805	0.138
30222	ENSMUSG00000019782.10	Rwdd1	chr10	-	34010165	34010337	34010206	34010337	34008992	34009123	30222	5,3	2,0	0,2	2,2	140	99	0.00165705	0.0348271	0.639,1.0	0.0,0.414	0.613
30304	ENSMUSG00000074182.8	Znhit6	chr3	+	145576204	145576407	145576204	145576293	145576850	145576996	30304	15,12	65,75	29,13	21,24	198	99	3.64992e-05	0.00158	0.103,0.074	0.408,0.213	-0.222
30305	ENSMUSG00000074182.8	Znhit6	chr3	+	145576246	145576407	145576246	145576284	145576850	145576996	30305	15,12	5,3	29,15	0,0	198	99	1.81006e-06	0.000131381	0.6,0.667	1.0,1.0	-0.367
30307	ENSMUSG00000074182.8	Znhit6	chr3	+	145576273	145576766	145576273	145576293	145576850	145576996	30307	29,34	65,75	51,28	21,24	198	99	2.4822e-05	0.00115286	0.182,0.185	0.548,0.368	-0.275
30334	ENSMUSG00000022721.19	Trmt2a	chr16	+	18249061	18249298	18249061	18249234	18249485	18250033	30334	1,3	2,5	2,2	0,0	163	99	5.64993e-07	4.88477e-05	0.233,0.267	1.0,1.0	-0.75
30412	ENSMUSG00000011306.7	Sugp1	chr8	+	70042812	70043211	70042812	70043206	70048508	70048680	30412	0,0	6,5	8,2	10,13	104	99	5.66007e-05	0.00230923	0.0,0.0	0.432,0.128	-0.28
30444	ENSMUSG00000026879.14	Gsn	chr2	+	35305944	35306200	35305944	35306091	35306545	35306606	30444	1,0	0,2	11,4	0,0	198	99	0.00119564	0.0271003	1.0,0.0	1.0,1.0	-0.5
30445	ENSMUSG00000026879.14	Gsn	chr2	+	35305944	35306200	35305944	35306188	35306545	35306606	30445	1,0	2,1	11,4	1,4	111	99	0.000674601	0.0172865	0.308,0.0	0.908,0.471	-0.535
30474	ENSMUSG00000030512.13	Snrpa1	chr7	+	66069166	66069596	66069166	66069213	66070589	66070665	30474	9,20	0,1	7,5	7,7	198	99	2.25394e-08	2.94342e-06	1.0,0.909	0.333,0.263	0.656
30475	ENSMUSG00000030512.13	Snrpa1	chr7	+	66069423	66069596	66069423	66069526	66070589	66070665	30475	8,20	16,24	2,1	11,18	169	99	0.000105817	0.00390384	0.227,0.328	0.096,0.032	0.214
30481	ENSMUSG00000020196.10	Cabin1	chr10	-	75764013	75764270	75764024	75764270	75755368	75755431	30481	0,2	2,1	2,1	1,0	110	99	0.00101129	0.0238574	0.0,0.643	0.643,1.0	-0.5
30557	ENSMUSG00000066406.15	Akap13	chr7	+	75697301	75697434	75697301	75697377	75704364	75704539	30557	190271	0,0	73,65	9,2	156	99	2.7925e-06	0.000187837	1.0,1.0	0.837,0.954	0.105
30558	ENSMUSG00000066406.15	Akap13	chr7	+	75697301	75697438	75697301	75697377	75704364	75704539	30558	34,49	0,0	14,12	9,2	160	99	1.7542e-07	1.81292e-05	1.0,1.0	0.49,0.788	0.361
30597	ENSMUSG00000030538.15	Cib1	chr7	-	80232002	80232378	80232284	80232378	80230315	80230424	30597	1,3	0,1	0,0	1,2	198	99	1.10528e-05	0.000593751	1.0,0.6	0.0,0.0	0.8
30630	ENSMUSG00000036580.15	Spg20	chr3	+	55112386	55112808	55112386	55112491	55116983	55117795	30630	14,21	26,22	29,24	13,13	198	99	0.00264547	0.0494418	0.212,0.323	0.527,0.48	-0.236
30652	ENSMUSG00000032363.15	Adamts7	chr9	+	90186918	90187336	90186918	90187067	90188268	90188438	30652	0,0	45,73	7,7	34,24	198	99	9.19767e-07	7.45632e-05	0.0,0.0	0.093,0.127	-0.11
30656	ENSMUSG00000032363.15	Adamts7	chr9	+	90191364	90191756	90191364	90191647	90191835	90191962	30656	0,0	5,4	5,1	3,4	198	99	0.000203382	0.00662605	0.0,0.0	0.455,0.111	-0.283
30702	ENSMUSG00000001472.17	Tcf25	chr8	+	123399264	123399718	123399264	123399387	123400624	123403810	30702	0,7	4,7	10,4	2,0	198	99	0.000366651	0.0107552	0.0,0.333	0.714,1.0	-0.691
30706	ENSMUSG00000001472.17	Tcf25	chr8	+	123401057	123401380	123401057	123401189	123403146	123403806	30706	9,10	22,51	27,18	20,13	198	99	1.65755e-06	0.000122014	0.17,0.089	0.403,0.409	-0.277
30707	ENSMUSG00000001472.17	Tcf25	chr8	+	123401057	123401380	123401057	123401189	123403149	123403835	30707	7,7	22,28	27,19	14,4	198	99	3.67888e-07	3.40717e-05	0.137,0.111	0.491,0.704	-0.473
30710	ENSMUSG00000021140.9	Pcnx	chr12	+	81933274	81933715	81933274	81933633	81946930	81947021	30710	22,47	5,1	7,15	0,0	181	99	0.00104394	0.0244428	0.706,0.963	1.0,1.0	-0.165
30771	ENSMUSG00000024982.10	Zdhhc6	chr19	-	55315499	55315988	55315516	55315988	55314300	55314772	30771	10,7	4,9	1,2	0,0	116	99	1.39159e-05	0.000714356	0.681,0.399	1.0,1.0	-0.46
30807	ENSMUSG00000070436.12	Serpinh1	chr7	-	99352965	99353114	99353052	99353114	99351823	99351867	30807	187290	131223	114119	25,19	186	99	1.39966e-12	4.64731e-10	0.432,0.409	0.708,0.769	-0.318
30831	ENSMUSG00000039018.15	Mtg1	chr7	+	140137563	140137827	140137563	140137689	140138318	140138383	30831	1,11	1,0	0,1	2,0	198	99	0.00202829	0.0404504	0.333,1.0	0.0,1.0	0.166
30832	ENSMUSG00000039018.15	Mtg1	chr7	+	140137563	140137847	140137563	140137689	140138318	140138383	30832	1,11	1,0	0,1	2,0	198	99	0.00202829	0.0404504	0.333,1.0	0.0,1.0	0.166
30843	ENSMUSG00000030704.14	Rab6a	chr7	+	100629670	100629943	100629670	100629771	100631741	100631853	30843	8081280	226388	748725	492403	198	99	6.66004e-10	1.28313e-07	0.641,0.623	0.432,0.474	0.179
30862	ENSMUSG00000042700.16	Sipa1l1	chr12	+	82170025	82170410	82170025	82170076	82265956	82266025	30862	7,2	0,0	1,0	0,5	198	99	7.00855e-05	0.00274804	1.0,1.0	1.0,0.0	0.5
30886	ENSMUSG00000030649.18	Anapc15	chr7	+	101896862	101897046	101896862	101896943	101897188	101897360	30886	14,12	2,6	4,11	0,0	198	99	8.46251e-06	0.000483309	0.778,0.5	1.0,1.0	-0.361
30887	ENSMUSG00000030649.18	Anapc15	chr7	+	101896339	101896813	101896339	101896725	101897732	101898227	30887	10,4	0,0	9,5	6,0	187	99	0.000824848	0.020432	1.0,1.0	0.443,1.0	0.278
30893	ENSMUSG00000064307.13	Lrrc51	chr7	-	101933749	101933830	101933823	101933830	101920636	101920774	30893	8,4	0,0	6,10	2,2	173	99	0.00197093	0.0396358	1.0,1.0	0.632,0.741	0.314
30895	ENSMUSG00000066306.13	Numa1	chr7	+	101934110	101934274	101934110	101934129	101977379	101977450	30895	1,3	4,13	9,7	4,3	198	99	0.000158313	0.00540011	0.111,0.103	0.529,0.538	-0.427
30900	ENSMUSG00000066306.13	Numa1	chr7	+	101970179	101970377	101970179	101970354	101977379	101977450	30900	12,16	35,39	3,2	51,51	122	99	1.05306e-06	8.42743e-05	0.218,0.25	0.046,0.031	0.195
30993	ENSMUSG00000029202.12	Pds5a	chr5	-	65618431	65618580	65618435	65618580	65615415	65615604	30993	3,1	1,4	0,0	8,7	103	99	0.00153347	0.0327591	0.742,0.194	0.0,0.0	0.468
31000	ENSMUSG00000029202.12	Pds5a	chr5	-	65697548	65697856	65697553	65697856	65696762	65696937	31000	5,4	4,8	1,0	2,4	104	99	0.00181931	0.0373685	0.543,0.322	0.322,0.0	0.271
31017	ENSMUSG00000036781.13	Rps27l	chr9	+	66946354	66946678	66946354	66946512	66946830	66946939	31017	5,3	4,0	0,0	2,2	198	99	1.4102e-05	0.000722721	0.385,1.0	0.0,0.0	0.693
31035	ENSMUSG00000043866.11	Taf10	chr7	-	105743223	105743610	105743427	105743610	105742905	105743063	31035	14,29	8,15	29,20	5,2	198	99	0.00235326	0.0454502	0.467,0.492	0.744,0.833	-0.309
31041	ENSMUSG00000078584.9	AU022252	chr4	-	119232624	119232685	119232635	119232685	119232353	119232469	31041	8,13	6,14	3,1	9,21	110	99	0.000147276	0.00510079	0.545,0.455	0.231,0.041	0.364
31050	ENSMUSG00000003131.7	Pafah1b2	chr9	-	45983850	45984295	45984169	45984295	45978655	45978729	31050	8,13	1,3	16,13	0,0	198	99	0.00254419	0.048067	0.8,0.684	1.0,1.0	-0.258
31104	ENSMUSG00000066232.4	Ipo7	chr7	+	110040605	110040886	110040605	110040700	110041980	110042115	31104	9,3	3,1	13,8	0,0	198	99	0.000289087	0.00880262	0.6,0.6	1.0,1.0	-0.4
31141	ENSMUSG00000036606.17	Plxnb2	chr15	-	89166387	89166766	89166583	89166766	89165905	89166006	31141	7,8	3,3	4,3	0,0	198	99	2.44446e-05	0.00114212	0.538,0.571	1.0,1.0	-0.446
31191	ENSMUSG00000059119.9	Nap1l4	chr7	-	143548416	143548803	143548746	143548803	143546128	143546180	31191	2,2	2,4	2,2	0,0	198	99	2.92148e-08	3.72173e-06	0.333,0.2	1.0,1.0	-0.734
31231	ENSMUSG00000030654.9	Arl6ip1	chr7	-	118128862	118129110	118128895	118129110	118127133	118127267	31231	0,0	2,1	1,4	0,0	132	99	1.68818e-09	2.89504e-07	0.0,0.0	1.0,1.0	-1
31287	ENSMUSG00000044702.13	Palb2	chr7	-	122124256	122124573	122124393	122124573	122123636	122123708	31287	59,91	6,2	17,7	0,0	198	99	0.0026039	0.0488111	0.831,0.958	1.0,1.0	-0.106
31375	ENSMUSG00000042675.15	Ypel3	chr7	+	126776974	126777222	126776974	126777203	126777770	126777953	31375	8,1	4,5	2,0	19,17	118	99	0.000908958	0.0219919	0.627,0.144	0.081,0.0	0.345
31402	ENSMUSG00000032547.12	Ryk	chr9	+	102834981	102835479	102834981	102835223	102861873	102861995	31402	2,1	0,1	0,0	3,4	198	99	0.000555871	0.0148666	1.0,0.333	0.0,0.0	0.666
31502	ENSMUSG00000070371.11	Prss36	chr7	-	127934138	127934516	127934389	127934516	127933370	127933492	31502	30,47	21,24	8,6	17,12	198	99	0.000447619	0.0125297	0.417,0.495	0.19,0.2	0.261
31507	ENSMUSG00000070371.11	Prss36	chr7	-	127934138	127934516	127934389	127934516	127933566	127933832	31507	30,55	10,20	21,12	21,11	198	99	0.00215485	0.0425127	0.6,0.579	0.333,0.353	0.246
31516	ENSMUSG00000070371.11	Prss36	chr7	-	127934354	127934516	127934389	127934516	127934138	127934280	31516	5,4	26,32	0,0	11,9	134	99	0.0013317	0.0294361	0.124,0.085	0.0,0.0	0.105
31552	ENSMUSG00000034317.14	Trim59	chr3	-	69044257	69044723	69044405	69044723	69043788	69043842	31552	8,16	9,12	6,5	26,26	198	99	0.00010928	0.00399853	0.308,0.4	0.103,0.088	0.258
31670	ENSMUSG00000040139.14	9430038I01Rik	chr7	-	137376932	137377117	137376954	137377117	137376136	137376351	31670	5,12	7,9	1,1	0,0	121	99	2.92765e-05	0.00131475	0.369,0.522	1.0,1.0	-0.554
31848	ENSMUSG00000030417.15	Pdcd5	chr7	-	35647199	35647504	35647301	35647504	35646143	35646181	31848	10,5	0,0	17,12	3,3	198	99	0.000146063	0.00507657	1.0,1.0	0.739,0.667	0.297
31859	ENSMUSG00000031075.18	Ano1	chr7	-	144648171	144648640	144648574	144648640	144648023	144648079	31859	46,52	176278	45,35	45,61	198	99	1.26608e-07	1.35792e-05	0.116,0.086	0.333,0.223	-0.177
31904	ENSMUSG00000087687.3	Pet100	chr8	+	3621547	3621973	3621547	3621679	3622341	3622428	31904	3,10	4,9	4,6	0,0	198	99	1.79901e-07	1.84095e-05	0.273,0.357	1.0,1.0	-0.685
31906	ENSMUSG00000087687.3	Pet100	chr8	+	3621601	3621695	3621601	3621679	3622341	3622428	31906	18,27	4,9	14,7	0,0	115	99	1.94305e-05	0.000943147	0.795,0.721	1.0,1.0	-0.242
31908	ENSMUSG00000087687.3	Pet100	chr8	+	3622341	3622706	3622341	3622428	3623223	3624235	31908	6,13	0,7	1,13	0,0	198	99	0.000473083	0.0130934	1.0,0.481	1.0,1.0	-0.26
31921	ENSMUSG00000002949.15	Timm44	chr8	-	4266238	4266659	4266555	4266659	4261907	4261997	31921	21,41	13,11	36,42	4,4	198	99	0.00258098	0.048499	0.447,0.651	0.818,0.84	-0.28
31927	ENSMUSG00000002949.15	Timm44	chr8	-	4266238	4266451	4266325	4266451	4265225	4265276	31927	0,0	2,1	8,3	4,11	186	99	0.000133382	0.00468277	0.0,0.0	0.516,0.127	-0.322
31935	ENSMUSG00000038002.9	Cramp1l	chr17	-	24973080	24973259	24973086	24973259	24972335	24972401	31935	35,38	8,9	18,26	1,0	105	99	3.69657e-05	0.00159356	0.805,0.799	0.944,1.0	-0.17
31939	ENSMUSG00000037214.12	Thap1	chr8	+	26159097	26159381	26159097	26159150	26160774	26160970	31939	0,3	2,6	4,10	1,0	198	99	1.30924e-06	9.99084e-05	0.0,0.2	0.667,1.0	-0.734
31940	ENSMUSG00000037214.12	Thap1	chr8	+	26159097	26159519	26159097	26159150	26160774	26160970	31940	10,17	2,6	58,67	1,0	198	99	1.16617e-06	9.19128e-05	0.714,0.586	0.967,1.0	-0.334
32046	ENSMUSG00000063362.13	Alg11	chr8	+	22060720	22060930	22060720	22060749	22061885	22062116	32046	49,48	1,6	7,1	0,0	198	99	0.00201046	0.0402234	0.961,0.8	1.0,1.0	-0.119
32060	ENSMUSG00000063362.13	Alg11	chr8	+	22061885	22062120	22061885	22062116	22065125	22065931	32060	2,6	6,9	0,0	3,1	103	99	3.17909e-05	0.00141142	0.243,0.391	0.0,0.0	0.317
32081	ENSMUSG00000031540.13	Kat6a	chr8	+	22925280	22925442	22925280	22925292	22926376	22926470	32081	165282	0,0	38,45	6,0	198	99	0.00167887	0.0351673	1.0,1.0	0.76,1.0	0.12
32217	ENSMUSG00000036977.8	Anapc10	chr8	+	79711819	79712174	79711819	79711844	79713152	79713279	32217	1,7	57,71	10,4	14,17	198	99	0.000133829	0.00468853	0.009,0.047	0.263,0.105	-0.156
32228	ENSMUSG00000031583.13	Wrn	chr8	-	33385341	33385472	33385441	33385472	33353294	33353399	32228	50,84	6,3	32,32	0,0	198	99	0.00047321	0.0130934	0.806,0.933	1.0,1.0	-0.13
32229	ENSMUSG00000031583.13	Wrn	chr8	-	33385441	33385527	33385451	33385527	33353294	33353399	32229	6,3	8,22	0,0	20,19	109	99	3.29236e-05	0.00145344	0.405,0.11	0.0,0.0	0.258
32266	ENSMUSG00000031585.13	Gtf2e2	chr8	+	33732310	33732686	33732310	33732491	33735733	33735906	32266	0,1	2,0	1,2	0,0	198	99	0.00119564	0.0271003	0.0,1.0	1.0,1.0	-0.5
32274	ENSMUSG00000031585.13	Gtf2e2	chr8	+	33733442	33733706	33733442	33733528	33735733	33735906	32274	42,43	2,6	15,33	0,0	198	99	0.000271201	0.00839008	0.913,0.782	1.0,1.0	-0.152
32313	ENSMUSG00000031600.11	Vps37a	chr8	+	40540913	40541093	40540913	40540947	40543809	40543953	32313	195271	0,7	69,79	28,32	198	99	0	0	1.0,0.951	0.552,0.552	0.423
32345	ENSMUSG00000031634.13	Ufsp2	chr8	+	45975577	45975798	45975577	45975777	45979208	45979295	32345	8,7	1,1	3,3	3,4	120	99	0.00254954	0.0480857	0.868,0.852	0.452,0.382	0.443
32354	ENSMUSG00000050914.16	Ankrd37	chr8	-	45997617	45997723	45997707	45997723	45996964	45997125	32354	13,26	1,4	3,7	0,0	189	99	0.00190727	0.0386795	0.872,0.773	1.0,1.0	-0.177
32360	ENSMUSG00000050914.16	Ankrd37	chr8	-	45999502	45999867	45999650	45999867	45999250	45999403	32360	469628	97173	539487	377334	198	99	5.55112e-16	2.58591e-13	0.707,0.645	0.417,0.422	0.256
32364	ENSMUSG00000050914.16	Ankrd37	chr8	-	45999570	45999867	45999650	45999867	45999250	45999403	32364	425570	97173	471434	377334	179	99	1.11022e-16	5.41425e-14	0.708,0.646	0.409,0.418	0.264
32365	ENSMUSG00000050914.16	Ankrd37	chr8	-	45999570	45999867	45999858	45999867	45999250	45999403	32365	9,8	5,22	9,4	60,52	198	99	0.00116245	0.0265869	0.474,0.154	0.07,0.037	0.261
32368	ENSMUSG00000050914.16	Ankrd37	chr8	-	45999650	45999867	45999754	45999867	45999250	45999403	32368	97173	42,49	377334	32,17	198	99	1.70663e-12	5.49132e-10	0.536,0.638	0.855,0.908	-0.294
32370	ENSMUSG00000050914.16	Ankrd37	chr8	-	45999754	45999867	45999858	45999867	45999250	45999403	32370	42,49	5,22	32,17	60,52	198	99	1.89227e-07	1.90515e-05	0.808,0.527	0.211,0.14	0.492
32384	ENSMUSG00000022797.16	Tfrc	chr16	+	32616748	32617193	32616748	32616898	32618217	32618331	32384	35,42	2,0	25,46	4,6	198	99	0.00150752	0.0324716	0.897,1.0	0.758,0.793	0.173
32455	ENSMUSG00000028608.15	Czib	chr4	+	107890226	107890549	107890226	107890510	107891464	107891521	32455	7,4	6,6	0,0	4,7	138	99	3.00855e-06	0.000201071	0.456,0.324	0.0,0.0	0.39
32471	ENSMUSG00000029776.11	Hibadh	chr6	-	52628940	52629367	52629116	52629367	52622850	52622960	32471	1,1	0,0	1,1	4,0	198	99	0.000995376	0.0236069	1.0,1.0	0.111,1.0	0.445
32496	ENSMUSG00000036246.14	Gmip	chr8	+	69809773	69809858	69809773	69809856	69810629	69810717	32496	76145	16,26	68,30	4,1	101	99	0.000486773	0.0133974	0.823,0.845	0.943,0.967	-0.121
32516	ENSMUSG00000002342.17	Tmem161a	chr8	+	70180705	70181047	70180705	70180868	70181148	70181323	32516	11,20	5,6	5,5	0,0	198	99	8.78219e-06	0.000498365	0.524,0.625	1.0,1.0	-0.425
32520	ENSMUSG00000002343.11	Armc6	chr8	-	70234109	70234449	70234389	70234449	70231279	70231406	32520	72,76	5,5	34,20	0,0	198	99	0.000419103	0.0119023	0.878,0.884	1.0,1.0	-0.119
32557	ENSMUSG00000031838.8	Ifi30	chr8	-	70765860	70766304	70766201	70766304	70764919	70765102	32557	30,34	1,1	0,4	1,7	198	99	5.46301e-08	6.43443e-06	0.938,0.944	0.0,0.222	0.83
32559	ENSMUSG00000031838.8	Ifi30	chr8	-	70765943	70766304	70766201	70766304	70764919	70765102	32559	1,4	1,1	0,0	1,7	198	99	8.43794e-05	0.00322741	0.333,0.667	0.0,0.0	0.5
32576	ENSMUSG00000045128.9	Rpl18a	chr8	-	70895595	70895662	70895606	70895662	70895443	70895507	32576	2,2	1,0	2,0	12,8	110	99	6.45164e-06	0.000386492	0.643,1.0	0.13,0.0	0.756
32628	ENSMUSG00000007610.15	Gtpbp3	chr8	+	71491996	71492401	71491996	71492353	71492538	71493400	32628	5,2	4,10	0,1	10,5	147	99	0.00169022	0.0353339	0.457,0.119	0.0,0.119	0.229
32643	ENSMUSG00000031808.7	Slc27a1	chr8	+	71584632	71584841	71584632	71584770	71585345	71585492	32643	44,59	4,12	20,16	1,0	170	99	0.000508847	0.0138251	0.865,0.741	0.921,1.0	-0.158
32644	ENSMUSG00000031808.7	Slc27a1	chr8	+	71584632	71585076	71584632	71584770	71585345	71585492	32644	67,78	4,12	29,21	1,0	198	99	0.000576878	0.0152973	0.893,0.765	0.935,1.0	-0.139
32656	ENSMUSG00000019763.11	Rmnd1	chr10	-	4432063	4432295	4432230	4432295	4429076	4429171	32656	29,41	3,12	7,8	0,0	198	99	6.41753e-05	0.00256135	0.829,0.631	1.0,1.0	-0.27
32724	ENSMUSG00000027007.16	Itprid2	chr2	+	79636032	79636301	79636032	79636078	79640145	79640202	32724	5,6	3,0	1,6	34,32	198	99	1.89841e-05	0.0009258	0.455,1.0	0.014,0.086	0.677
32775	ENSMUSG00000001910.5	Nacc1	chr8	-	84687255	84687591	84687514	84687591	84677051	84677252	32775	0,0	2,3	2,1	0,0	198	99	1.79103e-09	3.05463e-07	0.0,0.0	1.0,1.0	-1
32776	ENSMUSG00000001910.5	Nacc1	chr8	-	84687389	84687591	84687514	84687591	84677051	84677252	32776	1,6	2,3	2,2	0,0	198	99	1.91038e-06	0.000137069	0.2,0.5	1.0,1.0	-0.65
32812	ENSMUSG00000052456.9	Asna1	chr8	-	85024474	85024868	85024677	85024868	85024177	85024325	32812	9,7	34,33	10,9	12,7	198	99	0.00135551	0.0298355	0.117,0.096	0.294,0.391	-0.236
32834	ENSMUSG00000001419.17	Mef2d	chr3	+	88158220	88158469	88158220	88158355	88159121	88159332	32834	1,0	4,3	3,4	0,0	198	99	7.06157e-12	2.00363e-09	0.111,0.0	1.0,1.0	-0.945
32862	ENSMUSG00000036712.15	Cyld	chr8	+	88697046	88697193	88697046	88697099	88702304	88702438	32862	8,4	14,8	0,0	3,6	193	99	7.20233e-05	0.00280639	0.227,0.204	0.0,0.0	0.215
32864	ENSMUSG00000036712.15	Cyld	chr8	+	88697027	88697193	88697027	88697099	88705225	88705879	32864	24,35	54,59	4,7	51,40	193	99	5.61156e-06	0.000343416	0.186,0.233	0.039,0.082	0.149
32874	ENSMUSG00000013858.14	Tmem259	chr10	-	79977962	79978605	79978187	79978605	79977357	79977799	32874	40,49	0,0	32,27	2,3	198	99	0.0024189	0.0464307	1.0,1.0	0.889,0.818	0.147
32974	ENSMUSG00000036564.17	Ndrg4	chr8	+	95709771	95709954	95709771	95709822	95710663	95710711	32974	65100	0,0	14,13	4,2	198	99	1.32682e-05	0.000687897	1.0,1.0	0.636,0.765	0.299
33029	ENSMUSG00000023984.17	Gm20517	chr17	+	47679663	47679869	47679663	47679718	47680681	47682862	33029	38,56	16,19	16,24	0,0	198	99	1.06001e-08	1.4712e-06	0.543,0.596	1.0,1.0	-0.43
33041	ENSMUSG00000038000.10	Acd	chr8	-	105699806	105699895	105699860	105699895	105699394	105699491	33041	6,5	4,13	7,4	2,0	153	99	0.00185597	0.0378854	0.493,0.199	0.694,1.0	-0.501
33092	ENSMUSG00000031921.17	Terf2	chr8	-	107076609	107076996	107076787	107076996	107072559	107072645	33092	86126	13,19	62,47	2,3	198	99	0.00234185	0.0453141	0.768,0.768	0.939,0.887	-0.145
33137	ENSMUSG00000022051.15	Bnip3l	chr14	-	67007836	67008193	67008169	67008193	66999520	66999704	33137	28,27	5,11	4,1	7,4	198	99	0.000267385	0.00831211	0.737,0.551	0.222,0.111	0.478
33196	ENSMUSG00000031837.14	Necab2	chr8	+	119450081	119450322	119450081	119450106	119452081	119452190	33196	1,2	18,36	7,8	18,29	198	99	0.000692974	0.0176558	0.027,0.027	0.163,0.121	-0.115
33221	ENSMUSG00000031818.12	Cox4i1	chr8	+	120668221	120668687	120668221	120668602	120669308	120669821	33221	4,5	4,1	3,1	0,0	184	99	1.83594e-05	0.000903807	0.35,0.729	1.0,1.0	-0.461
33233	ENSMUSG00000052934.14	Fbxo31	chr8	-	121556119	121556351	121556217	121556351	121555205	121555359	33233	0,5	2,3	7,9	0,0	197	99	4.1913e-07	3.76987e-05	0.0,0.456	1.0,1.0	-0.772
33265	ENSMUSG00000017478.15	Zc3h18	chr8	+	122411637	122412031	122411637	122411902	122412989	122413150	33265	1,0	2,3	1,1	0,0	198	99	5.77846e-11	1.43136e-08	0.2,0.0	1.0,1.0	-0.9
33312	ENSMUSG00000039116.7	Adgrg6	chr10	-	14544832	14544995	14544926	14544995	14535853	14535954	33312	7,6	2,1	1,0	1,1	193	99	0.000665421	0.0171357	0.642,0.755	0.339,0.0	0.529
33358	ENSMUSG00000031987.6	Egln1	chr8	-	124915300	124915780	124915338	124915780	124914016	124914153	33358	8,10	0,0	187188	30,28	137	99	0.000100538	0.00374004	1.0,1.0	0.818,0.829	0.177
33377	ENSMUSG00000057193.8	Slc44a2	chr9	+	21342394	21342885	21342394	21342859	21342963	21343047	33377	2,3	1,1	0,0	3,1	125	99	8.02854e-06	0.000464896	0.613,0.704	0.0,0.0	0.658
33378	ENSMUSG00000057193.8	Slc44a2	chr9	+	21342394	21342887	21342394	21342859	21342963	21343047	33378	2,2	1,1	0,0	3,1	127	99	8.19164e-05	0.00314075	0.609,0.609	0.0,0.0	0.609
33394	ENSMUSG00000027752.15	Exosc8	chr3	-	54733915	54734313	54734295	54734313	54733657	54733731	33394	6,15	0,0	18,20	5,6	198	99	7.08669e-06	0.000418907	1.0,1.0	0.643,0.625	0.366
33396	ENSMUSG00000027752.15	Exosc8	chr3	-	54733923	54734313	54734295	54734313	54733657	54733731	33396	10,18	0,0	20,20	5,6	198	99	4.275e-06	0.000270234	1.0,1.0	0.667,0.625	0.354
33510	ENSMUSG00000031939.16	Taf1d	chr9	+	15311492	15311818	15311492	15311695	15312773	15314264	33510	213324	363553	786653	337293	198	99	0	0	0.227,0.227	0.538,0.527	-0.305
33526	ENSMUSG00000030203.17	Dusp16	chr6	-	134791070	134791334	134791237	134791334	134760845	134761434	33526	0,0	2,2	1,2	0,0	198	99	1.32355e-09	2.34425e-07	0.0,0.0	1.0,1.0	-1
33564	ENSMUSG00000025781.14	Atp5c1	chr2	-	10079903	10080322	10080200	10080322	10069692	10069727	33564	0,0	2,2	4,2	3,1	198	99	4.58338e-05	0.00192551	0.0,0.0	0.4,0.5	-0.45
33680	ENSMUSG00000032040.15	Dcps	chr9	-	35125157	35125277	35125166	35125277	35124411	35124844	33680	0,0	2,1	1,1	0,0	108	99	1.05785e-08	1.4712e-06	0.0,0.0	1.0,1.0	-1
33702	ENSMUSG00000062762.16	Ei24	chr9	-	36797003	36797273	36797256	36797273	36793239	36793349	33702	68,71	12,11	35,27	13,25	198	99	0.000847991	0.0208235	0.739,0.763	0.574,0.351	0.289
33704	ENSMUSG00000062762.16	Ei24	chr9	-	36797212	36797361	36797256	36797361	36793239	36793349	33704	311367	12,11	149130	13,25	143	99	3.99845e-06	0.000254685	0.947,0.959	0.888,0.783	0.117
33727	ENSMUSG00000063524.13	Eno1	chr4	+	150237687	150238138	150237687	150238134	150239472	150239936	33727	21,63	9,15	7,7	0,1	103	99	0.000987145	0.0234652	0.692,0.801	1.0,0.871	-0.189
33728	ENSMUSG00000063524.13	Eno1	chr4	+	150238014	150238364	150238014	150238134	150239472	150239936	33728	18,35	9,15	28,7	0,1	198	99	3.56954e-06	0.000233073	0.5,0.538	1.0,0.778	-0.37
33732	ENSMUSG00000063524.13	Eno1	chr4	+	150238014	150238447	150238014	150238364	150239472	150239936	33732	33,42	18,35	7,2	28,7	182	99	6.83714e-06	0.000406465	0.499,0.395	0.12,0.135	0.32
33783	ENSMUSG00000050379.15	2022-09-06	chrX	-	36942054	36942216	36942081	36942216	36934383	36934480	33783	133217	17,20	111,84	42,18	126	99	8.60224e-05	0.0032742	0.86,0.895	0.675,0.786	0.147
33922	ENSMUSG00000034218.16	Atm	chr9	-	53536196	53536608	53536589	53536608	53533864	53533966	33922	6,7	0,5	4,7	0,0	198	99	0.0017571	0.0364902	1.0,0.412	1.0,1.0	-0.294
33925	ENSMUSG00000034218.16	Atm	chr9	-	53536416	53536608	53536589	53536608	53533864	53533966	33925	4,8	0,5	4,7	0,0	198	99	0.00134561	0.0296803	1.0,0.444	1.0,1.0	-0.278
33927	ENSMUSG00000034218.16	Atm	chr9	-	53536529	53536608	53536589	53536608	53533864	53533966	33927	4,7	0,5	5,7	0,0	159	99	0.00160299	0.0340578	1.0,0.466	1.0,1.0	-0.267
33935	ENSMUSG00000021733.11	Slc4a7	chr14	+	14774890	14775209	14774890	14775052	14778825	14778894	33935	0,3	7,9	2,1	1,0	198	99	0.00173718	0.0361701	0.0,0.143	0.5,1.0	-0.678
34070	ENSMUSG00000007892.8	Rplp1	chr9	-	61914208	61914542	61914368	61914542	61913887	61913962	34070	17,17	3,5	55,41	1,0	198	99	8.64286e-06	0.000491352	0.739,0.63	0.965,1.0	-0.298
34079	ENSMUSG00000032249.14	Anp32a	chr9	+	62341901	62342124	62341901	62342010	62371719	62371869	34079	8,19	41,82	19,20	15,27	198	99	1.52837e-05	0.000768148	0.089,0.104	0.388,0.27	-0.233
34087	ENSMUSG00000032249.14	Anp32a	chr9	+	62344798	62344993	62344798	62344887	62371719	62371869	34087	3,6	2,20	0,0	2,4	198	99	0.000518937	0.0140473	0.429,0.13	0.0,0.0	0.279
34153	ENSMUSG00000032366.15	Tpm1	chr9	-	67032465	67032816	67032793	67032816	67031028	67031098	34153	75,91	0,1	57,33	7,2	198	99	5.37147e-05	0.00220591	1.0,0.978	0.803,0.892	0.141
34259	ENSMUSG00000016933.17	Plcg1	chr2	+	160753156	160753555	160753156	160753532	160753642	160753744	34259	0,0	2,1	4,2	0,1	122	99	2.49881e-09	4.2386e-07	0.0,0.0	1.0,0.619	-0.809
34322	ENSMUSG00000035051.15	Dhx57	chr17	-	80274763	80275602	80275286	80275602	80272931	80273110	34322	92131	4,9	47,36	0,0	198	99	0.000237282	0.0075724	0.92,0.879	1.0,1.0	-0.101
34334	ENSMUSG00000056131.13	Pgm3	chr9	-	86570587	86570822	86570785	86570822	86570201	86570407	34334	5,14	6,3	8,1	0,0	198	99	2.2071e-06	0.000154107	0.294,0.7	1.0,1.0	-0.503
34335	ENSMUSG00000108592.1	Gm38973	chr7	-	27650869	27651059	27650998	27651059	27649425	27650242	34335	1,3	0,0	0,1	2,1	198	99	1.2351e-06	9.5534e-05	1.0,1.0	0.0,0.333	0.834
34359	ENSMUSG00000028788.14	Ptp4a2	chr4	+	129820679	129821025	129820679	129820838	129838977	129839678	34359	1,1	4,1	1,1	0,0	198	99	3.55215e-09	5.76213e-07	0.111,0.333	1.0,1.0	-0.778
34402	ENSMUSG00000028580.15	Pum1	chr4	+	130663366	130663761	130663366	130663394	130668924	130669298	34402	15,27	11,16	45,33	9,7	198	99	0.00165686	0.0348271	0.405,0.458	0.714,0.702	-0.276
34403	ENSMUSG00000028580.15	Pum1	chr4	+	130668924	130669298	130668924	130669203	130701041	130701110	34403	326485	36,39	211161	55,50	194	99	4.85517e-09	7.46477e-07	0.822,0.864	0.662,0.622	0.201
34428	ENSMUSG00000056267.14	Cep70	chr9	+	99278109	99278198	99278109	99278161	99281027	99281102	34428	34,43	0,3	19,16	5,5	136	99	0.000508958	0.0138251	1.0,0.913	0.734,0.7	0.24
34483	ENSMUSG00000020131.14	Pcsk4	chr10	-	80322048	80322209	80322135	80322209	80321286	80321951	34483	10,6	10,25	23,19	8,11	186	99	0.00125956	0.0282211	0.347,0.113	0.605,0.479	-0.312
34489	ENSMUSG00000020253.15	Ppm1m	chr9	-	106196375	106196711	106196592	106196711	106196049	106196157	34489	2,3	1,2	7,3	0,0	198	99	0.000391227	0.0113271	0.5,0.429	1.0,1.0	-0.535
34519	ENSMUSG00000010057.8	Nprl2	chr9	+	107544150	107544638	107544150	107544481	107544746	107544840	34519	0,2	3,1	3,2	0,0	198	99	6.05152e-07	5.17463e-05	0.0,0.5	1.0,1.0	-0.75
34524	ENSMUSG00000010067.13	Rassf1	chr9	+	107554582	107555080	107554582	107554770	107557452	107557557	34524	0,1	3,0	3,2	0,0	198	99	0.00024618	0.00778281	0.0,1.0	1.0,1.0	-0.5
34597	ENSMUSG00000060450.14	Rnf14	chr18	+	38297271	38297575	38297271	38297431	38299753	38299926	34597	37,37	9,5	8,21	0,1	198	99	0.000449071	0.0125479	0.673,0.787	1.0,0.913	-0.227
34620	ENSMUSG00000079260.3	Tmppe	chr9	+	114401104	114401557	114401104	114401269	114404520	114407276	34620	4,14	25,33	1,0	12,16	198	99	0.000192062	0.00635822	0.074,0.175	0.04,0.0	0.104
34653	ENSMUSG00000073664.11	Nbeal1	chr1	+	60180598	60181047	60180598	60180682	60181462	60181754	34653	8,4	0,0	10,4	4,1	198	99	5.17709e-05	0.0021406	1.0,1.0	0.556,0.667	0.388
34702	ENSMUSG00000006299.13	Aamp	chr1	-	74281322	74281642	74281526	74281642	74281088	74281179	34702	25,29	2,4	22,16	0,0	198	99	0.000737546	0.0185642	0.862,0.784	1.0,1.0	-0.177
34704	ENSMUSG00000006299.13	Aamp	chr1	-	74281368	74281642	74281526	74281642	74281088	74281179	34704	28,30	2,4	20,15	0,0	198	99	0.000870162	0.0212509	0.875,0.789	1.0,1.0	-0.168
34738	ENSMUSG00000038412.8	Higd1a	chr9	-	121856437	121856894	121856720	121856894	121852490	121852605	34738	82,58	11,10	114,72	0,2	198	99	1.24532e-07	1.3449e-05	0.788,0.744	1.0,0.947	-0.208
34740	ENSMUSG00000038412.8	Higd1a	chr9	-	121856449	121856894	121856720	121856894	121852490	121852605	34740	79,58	11,10	114,72	0,2	198	99	1.00649e-07	1.10744e-05	0.782,0.744	1.0,0.947	-0.211
34744	ENSMUSG00000038412.8	Higd1a	chr9	-	121856437	121856894	121856720	121856894	121852490	121852609	34744	88,73	115168	118,72	16,14	198	99	0	0	0.277,0.178	0.787,0.72	-0.526
34745	ENSMUSG00000038412.8	Higd1a	chr9	-	121856449	121856894	121856720	121856894	121852490	121852609	34745	98,80	115168	119,74	16,14	198	99	0	0	0.299,0.192	0.788,0.725	-0.511
34761	ENSMUSG00000038412.8	Higd1a	chr9	-	121857218	121857535	121857511	121857535	121856720	121856872	34761	136160	102146	184156	14,9	198	99	0	0	0.4,0.354	0.868,0.897	-0.506
34762	ENSMUSG00000038412.8	Higd1a	chr9	-	121857507	121857535	121857511	121857535	121856720	121856872	34762	136161	102146	184156	14,9	103	99	0	0	0.562,0.515	0.927,0.943	-0.397
34767	ENSMUSG00000047036.8	Zfp445	chr9	-	122865736	122865934	122865921	122865934	122861795	122862344	34767	3,10	10,9	5,5	0,0	198	99	9.55657e-08	1.06525e-05	0.13,0.357	1.0,1.0	-0.756
34783	ENSMUSG00000025785.5	Exosc7	chr9	+	123120101	123120531	123120101	123120299	123127805	123127971	34783	1,0	5,2	5,6	4,0	198	99	4.99731e-05	0.00208239	0.091,0.0	0.385,1.0	-0.647
34804	ENSMUSG00000020993.9	Trappc6b	chr12	-	59059255	59059511	59059403	59059511	59051640	59051708	34804	4,11	6,2	0,1	2,3	198	99	0.000438783	0.0123377	0.25,0.733	0.0,0.143	0.42
34806	ENSMUSG00000090112.8	Shprh	chr10	+	11149426	11149590	11149426	11149503	11151612	11154526	34806	0,6	2,3	4,4	0,0	186	99	1.48288e-06	0.000111255	0.0,0.516	1.0,1.0	-0.742
34917	ENSMUSG00000026603.13	Smyd2	chr1	-	189898352	189898896	189898785	189898896	189897422	189897483	34917	2,3	2,3	1,1	0,0	198	99	4.84855e-06	0.000302052	0.333,0.333	1.0,1.0	-0.667
35099	ENSMUSG00000079225.3	Gm9531	chr9	+	81677597	81677893	81677597	81677812	81678301	81678677	35099	1,0	0,2	1,1	0,0	180	99	0.00159231	0.0338972	1.0,0.0	1.0,1.0	-0.5
35136	ENSMUSG00000032480.17	Dhx30	chr9	-	110116677	110117335	110116935	110117335	110115490	110115582	35136	20,31	2,3	65,76	0,0	198	99	0.00144157	0.0312668	0.833,0.838	1.0,1.0	-0.165
35137	ENSMUSG00000032480.17	Dhx30	chr9	-	110116774	110117087	110116838	110117087	110115490	110115582	35137	6,12	15,34	11,5	6,1	163	99	0.00100651	0.0238086	0.195,0.177	0.527,0.752	-0.453
35145	ENSMUSG00000032480.17	Dhx30	chr9	-	110116935	110117431	110117357	110117431	110116677	110116792	35145	11,10	1,15	2,2	37,41	198	99	6.70872e-06	0.000400355	0.846,0.25	0.026,0.024	0.523

## Sheet: MXE
ID	GeneID	geneSymbol	chr	strand	X1stExonStart_0base	X1stExonEnd	X2ndExonStart_0base	X2ndExonEnd	upstreamES	upstreamEE	downstreamES	downstreamEE	ID.1	IJC_SAMPLE_1	SJC_SAMPLE_1	IJC_SAMPLE_2	SJC_SAMPLE_2	IncFormLen	SkipFormLen	PValue	FDR	IncLevel1	IncLevel2	IncLevelDifference
4	ENSMUSG00000069045.11	Ddx3y	chrY	-	1280309	1280439	1282900	1282948	1279422	1279578	1284321	1284382	4	195234	426582	45,40	204185	147	198	3.06084e-05	0.000698241	0.381,0.351	0.229,0.226	0.138
23	ENSMUSG00000047045.17	Tmem164	chrX	+	142834184	142834393	142841582	142841645	142805989	142806068	142842409	142843494	23	4,4	1,0	0,1	2,2	198	162	9.62942e-07	3.44674e-05	0.766,1.0	0.0,0.29	0.738
28	ENSMUSG00000087368.7	BC065397	chrX	+	136760417	136760575	136761990	136762088	136759855	136759918	136788520	136788617	28	9,12	14,8	7,4	2,0	198	197	0.0018905	0.0215915	0.39,0.599	0.777,1.0	-0.394
30	ENSMUSG00000043384.15	Gprasp1	chrX	+	135743441	135743522	135743562	135743614	135742732	135742978	135744498	135744575	30	58,71	67103	21,15	13,7	180	151	0.0054622	0.0490806	0.421,0.366	0.575,0.643	-0.216
32	ENSMUSG00000067369.12	Trmt2b	chrX	-	134266260	134266315	134267330	134267561	134263726	134263861	134270509	134270585	32	20,20	69124	39,30	31,42	198	154	2.09699e-07	8.98858e-06	0.184,0.111	0.495,0.357	-0.278
33	ENSMUSG00000067369.12	Trmt2b	chrX	-	134266260	134266315	134267330	134267561	134263726	134263861	134276845	134276927	33	147186	68126	144119	31,42	198	154	0.000797159	0.0108199	0.627,0.534	0.783,0.688	-0.155
71	ENSMUSG00000031105.16	Slc25a14	chrX	+	48623961	48624197	48625595	48625640	48623577	48623828	48629251	48629345	71	1,1	2,2	5,5	0,1	198	144	4.82773e-05	0.00103087	0.267,0.267	1.0,0.784	-0.625
72	ENSMUSG00000031105.16	Slc25a14	chrX	+	48623961	48624197	48628135	48628183	48623577	48623828	48629251	48629345	72	1,1	8,8	5,5	0,4	198	147	9.90498e-05	0.00190001	0.085,0.085	1.0,0.481	-0.655
84	ENSMUSG00000037369.17	Kdm6a	chrX	+	18216937	18216996	18222756	18222877	18208735	18208785	18233859	18233914	84	52,67	87138	41,29	32,24	158	198	0.000220343	0.00368867	0.428,0.378	0.616,0.602	-0.206
100	ENSMUSG00000035173.14	Ccdc186	chr19	-	56810238	56810365	56812994	56813689	56809192	56809321	56821987	56822190	100	165176	84158	121120	31,25	198	198	3.18026e-06	9.85882e-05	0.663,0.527	0.796,0.828	-0.217
103	ENSMUSG00000047731.17	Wbp1l	chr19	+	46644352	46644455	46652473	46652635	46606711	46606759	46653964	46657382	103	229313	582819	28,15	212192	198	198	5.06262e-13	5.5979e-11	0.282,0.277	0.117,0.072	0.185
132	ENSMUSG00000046138.15	9930021J03Rik	chr19	-	29743532	29743612	29753599	29755017	29735115	29735205	29805281	29805989	132	9,16	64,82	11,15	24,14	198	179	0.000554907	0.00800763	0.113,0.15	0.293,0.492	-0.261
133	ENSMUSG00000038658.15	Ric1	chr19	+	29584174	29584213	29584466	29584577	29579764	29579968	29585780	29585870	133	90121	200267	21,21	85,83	138	198	0.00394115	0.0379891	0.392,0.394	0.262,0.266	0.129
146	ENSMUSG00000024642.17	Tle4	chr19	-	14544787	14544862	14564388	14564451	14517771	14517973	14594383	14594428	146	74100	63124	11,18	50,49	162	174	7.48316e-06	0.000203937	0.558,0.464	0.191,0.283	0.274
147	ENSMUSG00000024642.17	Tle4	chr19	-	14564388	14564451	14594383	14594428	14544787	14544862	14595589	14595653	147	45,56	46,81	12,8	35,39	144	162	0.000226192	0.00376843	0.524,0.438	0.278,0.188	0.248
165	ENSMUSG00000024743.16	Syt7	chr19	+	10422784	10423012	10426298	10426667	10417962	10418042	10435549	10435685	165	3,1	7,4	0,0	6,6	198	198	0.00359063	0.0354771	0.3,0.2	0.0,0.0	0.25
166	ENSMUSG00000024743.16	Syt7	chr19	+	10422784	10423012	10426298	10426667	10421756	10421888	10435549	10435685	166	4,3	5,25	0,0	6,6	198	198	0.000359846	0.00554297	0.444,0.107	0.0,0.0	0.276
167	ENSMUSG00000024743.16	Syt7	chr19	+	10422784	10423012	10430337	10430460	10421756	10421888	10435549	10435685	167	4,3	10,21	0,0	3,2	198	198	0.000580246	0.00831797	0.286,0.125	0.0,0.0	0.205
203	ENSMUSG00000058881.13	Zfp516	chr18	+	82986743	82988198	82993069	82993189	82955523	82957449	82994469	82994537	203	323433	249405	206178	87,95	198	198	4.02244e-05	0.000876156	0.565,0.517	0.703,0.652	-0.137
204	ENSMUSG00000058881.13	Zfp516	chr18	+	82986743	82988198	82994469	82994537	82955523	82957449	83001272	83005314	204	372502	241295	294266	61,67	198	167	1.66382e-11	1.5529e-09	0.566,0.589	0.803,0.77	-0.209
213	ENSMUSG00000036941.2	Elac1	chr18	-	73742336	73742801	73747166	73747331	73735037	73739300	73754401	73754479	213	23,42	37,37	24,26	6,14	198	198	0.00365671	0.0359867	0.383,0.532	0.8,0.65	-0.268
255	ENSMUSG00000005871.15	Apc	chr18	+	34279268	34279352	34289837	34289942	34276563	34276677	34296030	34296129	255	176248	103145	104,78	25,34	183	198	0.00547269	0.0491495	0.649,0.649	0.818,0.713	-0.116
259	ENSMUSG00000024381.16	Bin1	chr18	+	32426223	32426352	32431670	32431742	32424819	32424967	32431982	32432093	259	80132	261401	160157	153146	198	171	1.11022e-15	1.78458e-13	0.209,0.221	0.475,0.482	-0.263
267	ENSMUSG00000024317.15	Rnf138	chr18	+	21008724	21008890	21020887	21020999	21001956	21002169	21026085	21028223	267	146207	93139	297239	302247	198	198	0.00192928	0.0218821	0.611,0.598	0.496,0.492	0.111
268	ENSMUSG00000024317.15	Rnf138	chr18	+	21010676	21010792	21017818	21017875	21008724	21008890	21020887	21020999	268	206308	152247	407340	169143	198	156	8.08298e-06	0.000219251	0.516,0.496	0.655,0.652	-0.147
269	ENSMUSG00000024317.15	Rnf138	chr18	+	21010676	21010792	21020887	21020999	21008724	21008890	21026085	21027385	269	161256	92140	266205	309253	198	198	9.63382e-08	4.55703e-06	0.636,0.646	0.463,0.448	0.185
286	ENSMUSG00000040957.15	Cables1	chr18	+	11905924	11906002	11923359	11923456	11888736	11888829	11941179	11941387	286	77,86	27,39	23,23	39,29	177	196	4.68283e-07	1.83094e-05	0.759,0.709	0.395,0.468	0.302
293	ENSMUSG00000024293.16	Esco1	chr18	-	10588438	10588550	10593745	10595875	10585977	10586041	10596338	10596441	293	79,95	98152	34,34	25,19	198	198	0.000756024	0.0103998	0.446,0.385	0.576,0.642	-0.194
294	ENSMUSG00000024293.16	Esco1	chr18	-	10588438	10588550	10595675	10595875	10585977	10586041	10596338	10596441	294	76,99	98152	34,33	25,19	198	198	0.00100572	0.0130391	0.437,0.394	0.576,0.635	-0.19
301	ENSMUSG00000041225.16	Arhgap12	chr18	-	6069830	6070091	6111684	6112439	6064340	6064421	6115813	6115850	301	178321	142172	97105	162114	198	198	0.000167276	0.00290392	0.556,0.651	0.375,0.479	0.177
305	ENSMUSG00000024491.16	Rbm27	chr18	+	42321911	42322208	42324054	42324198	42320763	42320917	42325904	42326024	305	132247	161223	99,77	55,54	198	198	0.00409067	0.0390328	0.451,0.526	0.643,0.588	-0.127
306	ENSMUSG00000024491.16	Rbm27	chr18	+	42324054	42324198	42325904	42326024	42321911	42322208	42327163	42327238	306	149244	114141	161111	63,38	198	198	0.00088985	0.0118283	0.567,0.634	0.719,0.745	-0.131
314	ENSMUSG00000032624.16	Eml4	chr17	+	83425257	83425431	83427222	83427351	83421605	83421735	83427999	83428025	314	228323	181245	58,42	66,64	198	198	0.00404586	0.038667	0.557,0.569	0.468,0.396	0.131
330	ENSMUSG00000058704.9	Memo1	chr17	-	74217026	74217103	74225431	74225574	74202260	74202365	74241904	74242016	330	712963	506713	445402	198170	198	176	3.03052e-05	0.000692235	0.556,0.546	0.666,0.678	-0.121
331	ENSMUSG00000058704.9	Memo1	chr17	-	74225431	74225574	74241904	74242016	74202260	74202365	74258423	74258505	331	5,2	37,50	26,37	100,89	198	198	6.59807e-05	0.00135393	0.119,0.038	0.206,0.294	-0.171
332	ENSMUSG00000058704.9	Memo1	chr17	-	74225431	74225574	74255227	74255296	74202260	74202365	74258423	74258505	332	497817	37,50	371341	100,89	168	198	1.11022e-16	2.07242e-14	0.941,0.951	0.814,0.819	0.129
333	ENSMUSG00000058704.9	Memo1	chr17	-	74225431	74225574	74258423	74258505	74202260	74202365	74294691	74294769	333	7141169	37,50	512438	100,92	181	198	0	0	0.955,0.962	0.849,0.839	0.114
334	ENSMUSG00000058704.9	Memo1	chr17	-	74225431	74225574	74241904	74242016	74217026	74217103	74244974	74245087	334	7781019	706879	451433	260232	198	198	0.000103835	0.00197219	0.524,0.537	0.634,0.651	-0.112
350	ENSMUSG00000061950.17	Ppp4r1	chr17	+	65824259	65824789	65829374	65829547	65815922	65816050	65830996	65831092	350	376551	360560	182152	114,88	198	198	0.000474927	0.0070168	0.511,0.496	0.615,0.633	-0.12
405	ENSMUSG00000048249.14	Crebrf	chr17	+	26736788	26736983	26742041	26743131	26715649	26715774	26757804	26757999	405	10,11	71101	64,49	174125	198	198	5.57248e-06	0.000159634	0.123,0.098	0.269,0.282	-0.165
407	ENSMUSG00000048249.14	Crebrf	chr17	+	26739542	26739668	26742041	26743131	26736788	26736983	26757804	26757999	407	157180	80101	230177	213149	198	198	0.00101856	0.0131271	0.662,0.641	0.519,0.543	0.12
480	ENSMUSG00000058240.14	Cryzl1	chr16	-	91707224	91707293	91717403	91717475	91701071	91701205	91728557	91728597	480	152257	304503	180139	150151	171	168	3.08786e-07	1.26726e-05	0.329,0.334	0.541,0.475	-0.176
482	ENSMUSG00000058240.14	Cryzl1	chr16	-	91708828	91708873	91717403	91717475	91706842	91707293	91728557	91728600	482	148257	152262	171140	58,77	171	144	3.97564e-06	0.000119614	0.451,0.452	0.713,0.605	-0.208
510	ENSMUSG00000022668.10	Gtpbp8	chr16	-	44743737	44743868	44745394	44745493	44742503	44742603	44746199	44746359	510	2,4	54,60	6,3	18,15	198	198	0.00526717	0.0477294	0.036,0.062	0.25,0.167	-0.16
525	ENSMUSG00000022811.17	Zfp148	chr16	+	33434625	33434974	33456875	33457001	33427193	33427329	33466854	33466978	525	376591	302454	412321	191157	198	198	9.9873e-05	0.00190527	0.555,0.566	0.683,0.672	-0.117
547	ENSMUSG00000000326.13	Comt	chr16	-	18411126	18411320	18411689	18411957	18410682	18410814	18424303	18424360	547	370514	8271149	123,93	516428	198	198	2.33659e-07	9.89347e-06	0.309,0.309	0.192,0.179	0.123
560	ENSMUSG00000022677.15	Fopnl	chr16	-	14304453	14304587	14311046	14311131	14299243	14300209	14313815	14314013	560	189292	421538	76,81	389415	184	198	4.41073e-11	3.80946e-09	0.326,0.369	0.174,0.174	0.174
573	ENSMUSG00000068663.14	Clec16a	chr16	+	10638786	10638915	10644760	10644881	10635245	10635296	10688479	10688631	573	7,3	4,14	0,1	2,2	198	198	0.00514268	0.0467333	0.636,0.176	0.0,0.333	0.24
600	ENSMUSG00000023010.15	Tmbim6	chr15	+	99393694	99393730	99399656	99399871	99392985	99393040	99401579	99401663	600	13,32	50,66	6,5	214191	135	198	6.16174e-14	7.80787e-12	0.276,0.416	0.039,0.037	0.308
693	ENSMUSG00000022335.17	Zfat	chr15	-	68187050	68187236	68212592	68212844	68184420	68184571	68224766	68224943	693	38,63	39,69	41,30	19,12	198	198	0.000682677	0.00958065	0.494,0.477	0.683,0.714	-0.213
695	ENSMUSG00000022335.17	Zfat	chr15	-	68212613	68212844	68224766	68224943	68187050	68187236	68258667	68258856	695	26,49	6,12	40,39	1,4	198	198	0.00282602	0.029554	0.812,0.803	0.976,0.907	-0.134
699	ENSMUSG00000072501.5	Phf20l1	chr15	+	66595114	66595199	66597358	66597447	66594806	66594978	66604026	66604240	699	205322	56,74	108,84	59,57	184	188	1.15041e-06	4.02642e-05	0.789,0.816	0.652,0.601	0.176
700	ENSMUSG00000072501.5	Phf20l1	chr15	+	66622760	66622817	66623760	66623883	66615637	66615847	66623991	66624099	700	177242	13,26	30,25	28,28	156	198	0	0	0.945,0.922	0.576,0.531	0.38
723	ENSMUSG00000037386.16	Rims2	chr15	+	39452039	39452107	39452223	39452432	39436996	39437922	39454359	39454479	723	17,27	1,9	8,8	0,0	167	198	0.000409035	0.00618003	0.953,0.781	1.0,1.0	-0.133
733	ENSMUSG00000039458.15	Mtmr12	chr15	+	12233853	12233926	12236017	12236120	12232755	12232901	12237928	12238019	733	52,63	13,23	40,20	2,2	172	198	0.00021318	0.00359114	0.822,0.759	0.958,0.92	-0.149
762	ENSMUSG00000041625.15	Ggact	chr14	-	122891608	122891816	122900475	122900532	122816222	122816623	122913100	122913120	762	11,13	1,0	3,7	7,3	156	198	2.21962e-05	0.000532955	0.933,1.0	0.352,0.748	0.416
766	ENSMUSG00000031399.15	Fam3a	chrX	-	74390473	74390497	74390990	74391104	74387627	74387751	74392674	74392727	766	117133	29,38	60,58	6,6	198	123	0.00135715	0.0165683	0.715,0.685	0.861,0.857	-0.159
769	ENSMUSG00000022139.17	Mbnl2	chr14	+	120385390	120385591	120395711	120395765	120379149	120379314	120396450	120396604	769	8721285	102197	359316	100,77	198	153	8.97938e-06	0.000241678	0.869,0.834	0.735,0.76	0.104
788	ENSMUSG00000036461.16	Elf1	chr14	+	79536122	79536422	79560746	79560927	79515685	79515770	79567149	79567314	788	115193	23,36	184172	5,1	198	198	5.1148e-13	5.6198e-11	0.833,0.843	0.974,0.994	-0.146
807	ENSMUSG00000033487.14	Fndc3a	chr14	-	72589753	72589991	72599065	72599142	72574565	72574680	72652015	72652076	807	171284	4,14	150119	23,26	176	198	5.03074e-08	2.58384e-06	0.98,0.958	0.88,0.837	0.11
809	ENSMUSG00000033487.14	Fndc3a	chr14	-	72599065	72599142	72652015	72652091	72589753	72589991	72683633	72683771	809	210326	146227	155138	169152	175	176	0.001754	0.0202861	0.591,0.591	0.48,0.477	0.112
819	ENSMUSG00000021972.14	Hmbox1	chr14	-	64887574	64887660	64896649	64897126	64861515	64861626	64903238	64903266	819	55135	56,95	120,99	53,40	198	185	0.00142894	0.01723	0.479,0.57	0.679,0.698	-0.164
824	ENSMUSG00000057858.8	Fam204a	chr19	-	60220329	60220360	60221053	60221304	60220039	60220139	60226231	60226677	824	42,60	67108	55,91	59,57	198	130	0.00169613	0.0197621	0.292,0.267	0.38,0.512	-0.167
835	ENSMUSG00000021952.16	Xpo4	chr14	-	57643334	57643489	57648418	57648524	57643081	57643223	57664887	57665430	835	285343	38,46	156106	56,60	198	198	3.92068e-09	2.37983e-07	0.882,0.882	0.736,0.639	0.195
861	ENSMUSG00000022827.14	Rabl3	chr16	+	37563668	37563766	37567319	37567391	37559994	37560109	37570387	37570426	861	8,14	31,43	1,2	15,21	197	171	0.00512674	0.0466214	0.183,0.22	0.055,0.076	0.136
865	ENSMUSG00000058690.14	Ccser2	chr14	-	36896254	36896344	36898163	36898250	36874935	36879762	36900761	36900845	865	71,86	47,79	101,89	155120	186	189	0.00160449	0.0187948	0.606,0.525	0.398,0.43	0.151
872	ENSMUSG00000021884.18	Hacl1	chr14	-	31621002	31621108	31622838	31622974	31619844	31619928	31640493	31640598	872	0,0	49,62	2,4	31,21	198	198	0.00228648	0.0249801	0.0,0.0	0.061,0.16	-0.111
875	ENSMUSG00000021891.8	Mettl6	chr14	-	31487570	31487741	31492321	31492456	31482790	31482932	31493596	31493964	875	294359	290417	44,35	89,60	198	198	0.00148756	0.0177363	0.503,0.463	0.331,0.368	0.133
881	ENSMUSG00000042323.17	Pbrm1	chr14	+	31110414	31110579	31113848	31114004	31107108	31107310	31117012	31117083	881	134158	368653	25,20	194213	198	198	2.38566e-07	1.00567e-05	0.267,0.195	0.114,0.086	0.131
886	ENSMUSG00000046753.10	Ccdc66	chr14	-	27500240	27500682	27505637	27505663	27498723	27498889	27506650	27506715	886	14,15	60,87	2,3	47,44	125	198	0.001453	0.017455	0.27,0.215	0.063,0.097	0.162
918	ENSMUSG00000039599.16	Fam149b	chr14	+	20356354	20356497	20358023	20358140	20352703	20352839	20363262	20363450	918	61119	26,24	77,55	6,7	198	198	0.00126119	0.0156053	0.701,0.832	0.928,0.887	-0.141
927	ENSMUSG00000039599.16	Fam149b	chr14	+	20363262	20363450	20374329	20374454	20358023	20358140	20375509	20375613	927	24,25	86124	6,6	55,68	198	198	0.00461913	0.0431351	0.218,0.168	0.098,0.081	0.104
955	ENSMUSG00000046169.10	Adamts6	chr13	+	104413707	104413810	104426934	104427068	104399942	104400006	104444052	104444216	955	39,60	15,28	15,11	28,21	198	198	1.49698e-06	5.10562e-05	0.722,0.682	0.349,0.344	0.355
956	ENSMUSG00000021709.14	Erbin	chr13	-	103824719	103824848	103827906	103828023	103823313	103823406	103833497	103835028	956	601904	607919	96109	365343	198	198	0	0	0.498,0.496	0.208,0.241	0.273
958	ENSMUSG00000021709.14	Erbin	chr13	-	103824719	103824926	103827906	103828023	103823313	103823406	103833497	103835028	958	601904	633971	96109	554526	198	198	0	0	0.487,0.482	0.148,0.172	0.325
959	ENSMUSG00000021709.14	Erbin	chr13	-	103827906	103828023	103830187	103830331	103824719	103824926	103833497	103835028	959	84136	11481856	77,59	252236	198	198	1.11022e-16	2.07242e-14	0.068,0.068	0.234,0.2	-0.149
1015	ENSMUSG00000057440.8	Mpp7	chr18	-	7572640	7572828	7607884	7608009	7561725	7561872	7608913	7608982	1015	10,12	0,6	1,2	0,0	198	198	0.00113454	0.014344	1.0,0.667	1.0,1.0	-0.166
1033	ENSMUSG00000021495.10	Fam193b	chr13	-	55554216	55554448	55555982	55556225	55552961	55553349	55570774	55571100	1033	38,30	70111	2,5	32,29	198	198	0.00137579	0.0167723	0.352,0.213	0.059,0.147	0.179
1047	ENSMUSG00000057531.14	Dtnbp1	chr13	-	44953171	44953194	44970045	44970178	44930995	44931151	44986034	44986095	1047	7,10	86,95	61,47	36,38	198	122	0	0	0.048,0.061	0.511,0.432	-0.417
1049	ENSMUSG00000057531.14	Dtnbp1	chr13	-	44970045	44970178	44982740	44982873	44930995	44931151	44986034	44986095	1049	395574	7,10	287244	61,47	198	198	0	0	0.983,0.983	0.825,0.838	0.152
1097	ENSMUSG00000021156.17	Zmynd11	chr13	-	9693429	9693548	9695738	9695826	9690902	9691110	9697643	9697736	1097	269379	248339	302260	167165	187	198	0.00141805	0.0171311	0.535,0.542	0.657,0.625	-0.103
1098	ENSMUSG00000021156.17	Zmynd11	chr13	-	9693429	9693548	9698627	9698705	9690902	9691110	9720772	9720932	1098	95111	248339	145142	167165	177	198	2.69428e-09	1.68855e-07	0.3,0.268	0.493,0.491	-0.208
1112	ENSMUSG00000024236.18	Svil	chr18	+	5054017	5054098	5055979	5056849	5048884	5049494	5058124	5058159	1112	5,12	1,8	5,3	1,0	180	198	0.00230247	0.0250916	0.846,0.623	0.846,1.0	-0.189
1113	ENSMUSG00000024236.18	Svil	chr18	+	5054017	5054098	5057274	5057439	5048884	5049494	5058124	5058159	1113	5,12	3,10	5,3	1,0	180	198	0.00043685	0.00653769	0.647,0.569	0.846,1.0	-0.315
1129	ENSMUSG00000007411.16	Mark3	chr12	+	111647470	111647728	111651957	111651984	111639936	111640040	111653389	111653434	1129	682997	113136	350268	20,17	198	126	1.80136e-06	6.01377e-05	0.793,0.823	0.918,0.909	-0.105
1152	ENSMUSG00000021188.14	Trip11	chr12	-	101862592	101862692	101871823	101871927	101846595	101846677	101873322	101873486	1152	37,61	56135	19,13	12,10	198	198	0.00154773	0.018229	0.398,0.311	0.613,0.565	-0.234
1168	ENSMUSG00000038773.11	Kdm3b	chr18	+	34799284	34799359	34803449	34804049	34796787	34796912	34808240	34809489	1168	119214	92145	156149	42,52	174	198	1.10082e-06	3.88418e-05	0.595,0.627	0.809,0.765	-0.176
1202	ENSMUSG00000059436.13	Max	chr12	-	76939966	76940090	76953168	76953276	76937273	76938755	76961989	76962201	1202	398598	463838	281233	141110	198	198	2.4547e-13	2.8793e-11	0.462,0.416	0.666,0.679	-0.234
1204	ENSMUSG00000044712.15	Slc38a6	chr12	+	73293698	73293799	73310144	73310197	73292159	73292233	73318976	73319016	1204	2,8	49,61	10,4	24,13	198	152	0.00236235	0.0256155	0.03,0.091	0.242,0.191	-0.156
[truncated: 1,277 more rows]

## Sheet: RI
ID	GeneID	geneSymbol	chr	strand	riExonStart_0base	riExonEnd	upstreamES	upstreamEE	downstreamES	downstreamEE	ID.1	IJC_SAMPLE_1	SJC_SAMPLE_1	IJC_SAMPLE_2	SJC_SAMPLE_2	IncFormLen	SkipFormLen	PValue	FDR	IncLevel1	IncLevel2	IncLevelDifference
[truncated: 1,062 more rows]

[truncated: 1 more sheets: SE]
