# Supplementary material for: The context-dependent epigenetic and organogenesis programs determine 3D vs. 2D cellular fitness of MYC-driven murine liver cancer cells
Source: eLife. 2025 May 6;14:RP101299. doi: 10.7554/eLife.101299 (PMC12055005; doi:10.7554/eLife.101299)
Supplement: Supplementary file 6. [file elife-101299-supp6.xlsx]

## Sheet: A3SS
Term	Overlap	P-value		Adjusted P-value	Old P-value	Old Adjusted P-value	Odds Ratio	Combined Score	Genes
Progesterone-mediated oocyte maturation	11/100	0.000278282	3.55551	0.0743013	0	0	3.90186	31.944	MAD2L2;STK10;MAPK11;MAPK1;PIK3R2;BRAF;CDC25C;PKMYT1;BUB1;ANAPC10;CDC25B
RNA transport	14/186	0.00209547	2.67872	0.279204	0	0	2.57118	15.859	EIF2B5;NUP205;SENP2;THOC7;NXF1;XPO1;XPOT;EIF3I;XPO5;GEMIN5;ACIN1;TARDBP;EIF4B;EIF4G1
RNA degradation	1979-08-01	0.00313712	2.50347	0.279204	0	0	3.54306	20.4238	PAN2;CNOT7;CNOT2;DIS3L;XRN2;CNOT3;CNOT10;DCP1B
Central carbon metabolism in cancer	1970-07-01	0.00599314	2.22235	0.377828	0	0	3.48961	17.8568	LDHA;GLS2;PGAM1;MAPK1;SIRT6;PIK3R2;MTOR
Oocyte meiosis	10/129	0.00707542	2.15025	0.377828	0	0	2.64445	13.093	MAD2L2;MAPK11;PPP3CB;ESPL1;PPP2R5A;MAPK1;CDC25C;PKMYT1;BUB1;ANAPC10
Cell cycle	9/124	0.0154379	1.81141	0.632496	0	0	2.45928	10.2575	MAD2L2;STAG1;ESPL1;TFDP2;CDC25C;PKMYT1;BUB1;ANAPC10;CDC25B
Acute myeloid leukemia	1967-06-01	0.0177448	1.75093	0.632496	0	0	3.08447	12.4355	MAPK1;PIK3R2;BRAF;MTOR;PML;PPARD
Proteoglycans in cancer	12/205	0.0270943	1.56712	0.632496	0	0	1.95549	7.05626	MAPK11;DDX5;CTTN;CAV2;FN1;FLNA;MAPK1;PIK3R2;BRAF;ARHGEF1;EIF4B;MTOR
Arginine biosynthesis	2023-03-22	0.0296996	1.52725	0.632496	0	0	4.9381	17.3654	GOT1;GLS2;GPT
Coronavirus disease	13/232	0.0300242	1.52253	0.632496	0	0	1.86747	6.5469	RPL10;DDX58;RPLP0;PIK3R2;RPS4X;MAPK11;RPS19;IRAK1;MAPK1;RPS2;FAU;RPL39;RPL28
Neurotrophin signaling pathway	8/119	0.0324372	1.48896	0.632496	0	0	2.26158	7.75372	MAPK11;RAP1A;MAPK7;PRDM4;IRAK1;MAPK1;PIK3R2;BRAF
Bacterial invasion of epithelial cells	1977-06-01	0.0326202	1.48651	0.632496	0	0	2.64866	9.06591	MAD2L2;CTTN;CAV2;FN1;CLTA;PIK3R2
Choline metabolism in cancer	1998-07-01	0.0331646	1.47933	0.632496	0	0	2.41238	8.21723	SLC44A3;CHKA;TSC2;MAPK1;PIK3R2;DGKZ;MTOR
Glycerophospholipid metabolism	1998-07-01	0.0331646	1.47933	0.632496	0	0	2.41238	8.21723	PCYT2;CHKA;PNPLA7;LPCAT4;PEMT;TAZ;DGKZ
Ribosome biogenesis in eukaryotes	7/108	0.0515783	1.28753	0.860311	0	0	2.17241	6.44043	NXF1;XPO1;NVL;EFL1;XRN2;WDR75;WDR43
mTOR signaling pathway	9/154	0.0516329	1.28707	0.860311	0	0	1.94743	5.77138	FLCN;STK11;TSC2;MAPK1;PIK3R2;BRAF;TELO2;EIF4B;MTOR
Ribosome	9/158	0.0588575	1.2302	0.860311	0	0	1.89475	5.36715	RPS4X;MRPS16;RPS19;RPL10;RPLP0;RPS2;FAU;RPL39;RPL28
Amino sugar and nucleotide sugar metabolism	1948-04-01	0.0615344	1.21088	0.860311	0	0	2.84407	7.92973	CYB5R1;UXS1;MPI;GALK1
Renal cell carcinoma	1969-05-01	0.0634115	1.19783	0.860311	0	0	2.44555	6.7451	FLCN;RAP1A;MAPK1;PIK3R2;BRAF
Autophagy	8/137	0.0644428	1.19083	0.860311	0	0	1.9442	5.33094	STK11;ATG9A;TSC2;MAPK1;PIK3R2;RAB8A;MTOR;ATG2B
Cysteine and methionine metabolism	1950-04-01	0.0694533	1.15831	0.883049	0	0	2.72014	7.25488	LDHA;GCLC;GOT1;PSAT1
Spinocerebellar ataxia	8/143	0.0783537	1.10594	0.883585	0	0	1.85721	4.72942	PSMA6;ATXN1;PSMA4;PIK3R2;VLDLR;MTOR;PUM2;ATG2B
mRNA surveillance pathway	1998-06-01	0.0850931	1.07011	0.883585	0	0	2.04185	5.03115	CPSF4;NXF1;SMG1;PPP2R5A;ACIN1;TARDBP
Fanconi anemia pathway	1954-04-01	0.0867682	1.06164	0.883585	0	0	2.50201	6.11619	REV1;USP1;TELO2;FANCG
Synaptic vesicle cycle	1978-05-01	0.0955414	1.01981	0.883585	0	0	2.14305	5.03229	ATP6V0B;CLTA;TCIRG1;AP2A2;VAMP2
Endocytosis	12/252	0.0957851	1.0187	0.883585	0	0	1.56869	3.67959	GRK2;CAV2;RUFY2;MVB12B;CLTA;WWP1;EPS15L1;ARAP1;AP2A2;RAB8A;ARFGAP1;PML
Alanine, aspartate and glutamate metabolism	1937-03-01	0.106977	0.970711	0.883585	0	0	2.75739	6.16316	GOT1;GLS2;GPT
Thermogenesis	11/232	0.109814	0.959341	0.883585	0	0	1.56058	3.44727	MAPK11;SMARCD3;NDUFA6;COX4I1;TSC2;COX11;ACSL4;SIRT6;NDUFS1;COX6C;MTOR
Notch signaling pathway	1959-04-01	0.111033	0.95455	0.883585	0	0	2.27396	4.99802	LFNG;NCOR2;JAG2;ATXN1
VEGF signaling pathway	1959-04-01	0.111033	0.95455	0.883585	0	0	2.27396	4.99802	MAPK11;PPP3CB;MAPK1;PIK3R2
Peroxisome	1982-05-01	0.112035	0.950648	0.883585	0	0	2.0313	4.44641	ABCD4;SLC25A17;PEX5;MPV17L2;ACSL4
FoxO signaling pathway	7/131	0.11454	0.941043	0.883585	0	0	1.76735	3.82955	MAPK11;STK11;CCNG2;MAPK1;PIK3R2;BRAF;CSNK1E
Oxidative phosphorylation	7/133	0.121359	0.915927	0.883585	0	0	1.73911	3.66779	ATP6V0B;NDUFA6;COX4I1;COX11;NDUFS1;TCIRG1;COX6C
Insulin signaling pathway	7/137	0.135605	0.867724	0.883585	0	0	1.68525	3.36715	EXOC7;TSC2;MAPK1;PIK3R2;BRAF;PHKB;MTOR
Fluid shear stress and atherosclerosis	7/139	0.143023	0.844594	0.883585	0	0	1.65955	3.2274	MAPK11;GSTM1;MAPK7;CAV2;TRPV4;PIK3R2;ARHGEF2
PD-L1 expression and PD-1 checkpoint pathway in cancer	1989-05-01	0.143904	0.841927	0.883585	0	0	1.86135	3.60843	MAPK11;PPP3CB;MAPK1;PIK3R2;MTOR
Glutamatergic synapse	6/114	0.144747	0.83939	0.883585	0	0	1.73791	3.35898	GNG10;PPP3CB;GRK2;GLS2;GNB1;MAPK1
D-Glutamine and D-glutamate metabolism	2023-01-05	0.146137	0.835239	0.883585	0	0	7.79952	15.0001	GLS2
Glycolysis / Gluconeogenesis	1967-04-01	0.155232	0.809019	0.883585	0	0	1.98438	3.69658	LDHA;PGAM1;ALDOA;ADH5
Long-term potentiation	1967-04-01	0.155232	0.809019	0.883585	0	0	1.98438	3.69658	PPP3CB;RAP1A;MAPK1;BRAF
Th1 and Th2 cell differentiation	1992-05-01	0.158638	0.799593	0.883585	0	0	1.79689	3.3083	JAG2;MAPK11;PPP3CB;MAPK1;IL12RB1
Amyotrophic lateral sclerosis	15/364	0.16493	0.782701	0.883585	0	0	1.34739	2.42831	DCTN6;NUP205;NDUFA6;COX4I1;COX6C;MTOR;PSMA6;NXF1;MAPK11;PPP3CB;PSMA4;NDUFS1;TARDBP;RAB8A;ATG2B
AMPK signaling pathway	6/120	0.171015	0.766965	0.883585	0	0	1.64593	2.90672	STK11;TSC2;PPP2R5A;PIK3R2;RAB8A;MTOR
Type II diabetes mellitus	1946-03-01	0.171528	0.765665	0.883585	0	0	2.17925	3.84203	MAPK1;PIK3R2;MTOR
Phenylalanine, tyrosine and tryptophan biosynthesis	2023-01-06	0.172699	0.76271	0.883585	0	0	6.23929	10.9575	GOT1
Phosphonate and phosphinate metabolism	2023-01-06	0.172699	0.76271	0.883585	0	0	6.23929	10.9575	PCYT2
Vitamin B6 metabolism	2023-01-06	0.172699	0.76271	0.883585	0	0	6.23929	10.9575	PSAT1
Retrograde endocannabinoid signaling	7/148	0.178682	0.747919	0.883585	0	0	1.55289	2.67431	MAPK11;GNG10;DAGLA;NDUFA6;GNB1;MAPK1;NDUFS1
Pyruvate metabolism	1947-03-01	0.179285	0.746457	0.883585	0	0	2.12961	3.66033	LDHA;ME2;ADH5
Tuberculosis	8/180	0.199108	0.700911	0.883585	0	0	1.45489	2.34806	MAPK11;PPP3CB;ATP6V0B;IRAK1;RFX5;MAPK1;RFXANK;TCIRG1
Glioma	1975-04-01	0.204818	0.688632	0.883585	0	0	1.76006	2.79082	MAPK1;PIK3R2;BRAF;MTOR
MAPK signaling pathway	12/294	0.206749	0.684558	0.883585	0	0	1.33212	2.09976	MAPK11;PPP3CB;CACNB3;RAP1A;MAPK7;CSF1;IRAK1;TAOK2;FLNA;MAPK1;BRAF;CDC25B
Pancreatic cancer	1976-04-01	0.211319	0.675061	0.883585	0	0	1.73553	2.69768	MAPK1;PIK3R2;BRAF;MTOR
Cellular senescence	7/156	0.213194	0.671224	0.883585	0	0	1.4689	2.27027	MAPK11;PPP3CB;TRPV4;TSC2;MAPK1;PIK3R2;MTOR
Human immunodeficiency virus 1 infection	9/212	0.215953	0.665642	0.883585	0	0	1.38682	2.12558	MAPK11;GNG10;PPP3CB;IRAK1;GNB1;MAPK1;PIK3R2;CDC25C;MTOR
Pathways of neurodegeneration	18/475	0.226995	0.643984	0.883585	0	0	1.23385	1.82959	DCTN6;NDUFA6;CSF1;COX4I1;BRAF;CSNK1E;COX6C;MTOR;PSMA6;MAPK11;PPP3CB;PSMA4;ATXN1;MAPK1;NDUFS1;TARDBP;RAB8A;ATG2B
Prion disease	11/273	0.23173	0.635018	0.883585	0	0	1.31355	1.92065	PSMA6;MAPK11;PPP3CB;PSMA4;NDUFA6;CAV2;COX4I1;MAPK1;PIK3R2;NDUFS1;COX6C
Citrate cycle (TCA cycle)	1930-02-01	0.23916	0.621312	0.883585	0	0	2.22926	3.18924	ACLY;SUCLG1
Th17 cell differentiation	5/107	0.240142	0.619532	0.883585	0	0	1.53145	2.18465	MAPK11;PPP3CB;MAPK1;IL12RB1;MTOR
HIF-1 signaling pathway	5/109	0.251793	0.598956	0.883585	0	0	1.50184	2.07126	LDHA;MAPK1;PIK3R2;ALDOA;MTOR
Yersinia infection	6/137	0.254423	0.594444	0.883585	0	0	1.43107	1.95879	MAPK11;IRAK1;FN1;MAPK1;PIK3R2;ARHGEF1
Alzheimer disease	14/369	0.260654	0.583936	0.883585	0	0	1.23389	1.65904	NDUFA6;CSF1;COX4I1;PIK3R2;BRAF;CSNK1E;COX6C;MTOR;PSMA6;PPP3CB;PSMA4;MAPK1;NDUFS1;ATG2B
Human cytomegalovirus infection	9/225	0.267716	0.572325	0.883585	0	0	1.30247	1.71644	MAPK11;GNG10;PPP3CB;GNB1;TSC2;MAPK1;PIK3R2;ARHGEF1;MTOR
Hepatocellular carcinoma	7/168	0.268954	0.570322	0.883585	0	0	1.35857	1.7841	GSTM1;SMARCD3;PHF10;MAPK1;PIK3R2;BRAF;MTOR
Endometrial cancer	1958-03-01	0.269444	0.569531	0.883585	0	0	1.70272	2.23293	MAPK1;PIK3R2;BRAF
Ubiquitin mediated proteolysis	6/140	0.270207	0.568304	0.883585	0	0	1.39882	1.83045	HERC4;PPIL2;WWP1;STUB1;ANAPC10;PML
ErbB signaling pathway	1985-04-01	0.272045	0.565359	0.883585	0	0	1.54197	2.00732	MAPK1;PIK3R2;BRAF;MTOR
Tight junction	7/169	0.273775	0.562606	0.883585	0	0	1.35012	1.749	STK11;RAP1A;CTTN;ARHGEF2;RAPGEF6;RAB8A;LLGL2
Fructose and mannose metabolism	1933-02-01	0.274037	0.56219	0.883585	0	0	2.01322	2.60609	MPI;ALDOA
Colorectal cancer	1986-04-01	0.278984	0.554421	0.883585	0	0	1.52309	1.94437	MAPK1;PIK3R2;BRAF;MTOR
Protein processing in endoplasmic reticulum	7/171	0.283484	0.547471	0.883585	0	0	1.33351	1.68102	DNAJB2;SSR4;CANX;RAD23A;STUB1;RNF5;MBTPS2
Propanoate metabolism	1934-02-01	0.28566	0.54415	0.883585	0	0	1.9502	2.44351	LDHA;SUCLG1
Influenza A	7/172	0.28837	0.54005	0.883585	0	0	1.32536	1.6481	CPSF4;NXF1;XPO1;DDX58;MAPK1;PIK3R2;PML
Focal adhesion	8/201	0.288966	0.539153	0.883585	0	0	1.29517	1.60788	RAP1A;CAV2;LAMB2;FN1;FLNA;MAPK1;PIK3R2;BRAF
Ubiquinone and other terpenoid-quinone biosynthesis	2023-01-11	0.293633	0.532195	0.883585	0	0	3.11884	3.82191	COQ3
Tyrosine metabolism	1936-02-01	0.308838	0.510269	0.883585	0	0	1.83529	2.15636	GOT1;ADH5
PI3K-Akt signaling pathway	13/354	0.309575	0.509234	0.883585	0	0	1.19171	1.39734	CSF1;PKN3;LAMB2;FN1;TSC2;PPP2R5A;PIK3R2;MTOR;GNG10;STK11;GNB1;MAPK1;EIF4B
Lysine degradation	1963-03-01	0.312078	0.505736	0.883585	0	0	1.56042	1.81711	SETD2;KMT5C;PLOD3
Aldosterone-regulated sodium reabsorption	1937-02-01	0.320373	0.494344	0.883585	0	0	1.78276	2.02927	MAPK1;PIK3R2
Thyroid cancer	1937-02-01	0.320373	0.494344	0.883585	0	0	1.78276	2.02927	MAPK1;BRAF
Spliceosome	6/150	0.324299	0.489054	0.883585	0	0	1.301	1.46504	XAB2;DDX5;SNRNP70;PRPF40B;ACIN1;SRSF10
Rap1 signaling pathway	8/210	0.330277	0.481121	0.883585	0	0	1.23688	1.37025	ENAH;MAPK11;RAP1A;CSF1;MAPK1;PIK3R2;BRAF;RAPGEF6
Primary immunodeficiency	1938-02-01	0.33186	0.479045	0.883585	0	0	1.73315	1.91174	RFX5;RFXANK
IL-17 signaling pathway	1994-04-01	0.335261	0.474617	0.883585	0	0	1.38713	1.51592	USP25;MAPK11;MAPK7;MAPK1
Platelet activation	5/124	0.342561	0.465262	0.883585	0	0	1.31151	1.40503	MAPK11;RAP1A;MAPK1;PIK3R2;ARHGEF1
Various types of N-glycan biosynthesis	1939-02-01	0.343291	0.464337	0.883585	0	0	1.68622	1.80287	MAN2A2;MGAT4B
Non-alcoholic fatty liver disease	6/155	0.351915	0.453563	0.883585	0	0	1.25702	1.31279	MAPK11;NDUFA6;COX4I1;PIK3R2;NDUFS1;COX6C
Lipid and atherosclerosis	8/215	0.353651	0.451425	0.883585	0	0	1.20669	1.25429	MAPK11;PPP3CB;RAP1A;IRAK1;MAPK1;PIK3R2;ARHGEF1;VLDLR
Glycine, serine and threonine metabolism	1940-02-01	0.354659	0.450189	0.883585	0	0	1.64177	1.70185	PSAT1;PGAM1
Fc epsilon RI signaling pathway	1968-03-01	0.354873	0.449927	0.883585	0	0	1.44001	1.49185	MAPK11;MAPK1;PIK3R2
Huntington disease	11/306	0.355257	0.449457	0.883585	0	0	1.1646	1.20526	DCTN6;PSMA6;PSMA4;NDUFA6;COX4I1;CLTA;NDUFS1;COX6C;AP2A2;MTOR;ATG2B
Prostate cancer	1997-04-01	0.356541	0.44789	0.883585	0	0	1.34217	1.38419	MAPK1;PIK3R2;BRAF;MTOR
Osteoclast differentiation	5/127	0.361111	0.442359	0.883585	0	0	1.27906	1.30281	MAPK11;PPP3CB;CSF1;MAPK1;PIK3R2
Adipocytokine signaling pathway	1969-03-01	0.363405	0.439609	0.883585	0	0	1.41812	1.43548	STK11;ACSL4;MTOR
Bladder cancer	1941-02-01	0.365956	0.436571	0.883585	0	0	1.59959	1.60797	MAPK1;BRAF
Ferroptosis	1941-02-01	0.365956	0.436571	0.883585	0	0	1.59959	1.60797	GCLC;ACSL4
Lysosome	5/128	0.367302	0.434977	0.883585	0	0	1.2686	1.27059	ATP6V0B;SLC17A5;CLTA;TCIRG1;GUSB
Epithelial cell signaling in Helicobacter pylori infection	1970-03-01	0.371918	0.429553	0.883585	0	0	1.39688	1.38163	MAPK11;ATP6V0B;TCIRG1
Prolactin signaling pathway	1970-03-01	0.371918	0.429553	0.883585	0	0	1.39688	1.38163	MAPK11;MAPK1;PIK3R2
Relaxin signaling pathway	5/129	0.373495	0.427716	0.883585	0	0	1.2583	1.23924	MAPK11;GNG10;GNB1;MAPK1;PIK3R2
AGE-RAGE signaling pathway in diabetic complications	4/100	0.377814	0.422722	0.883585	0	0	1.30003	1.26539	MAPK11;FN1;MAPK1;PIK3R2
Fatty acid degradation	1943-02-01	0.388312	0.410819	0.883585	0	0	1.5214	1.43916	ACSL4;ADH5
Melanoma	1972-03-01	0.388876	0.410189	0.883585	0	0	1.35625	1.28098	MAPK1;PIK3R2;BRAF
Non-small cell lung cancer	1972-03-01	0.388876	0.410189	0.883585	0	0	1.35625	1.28098	MAPK1;PIK3R2;BRAF
Chemokine signaling pathway	7/192	0.388935	0.410123	0.883585	0	0	1.18085	1.11513	GNG10;GRK2;RAP1A;GNB1;MAPK1;PIK3R2;BRAF
Hepatitis B	6/162	0.390837	0.408004	0.883585	0	0	1.20017	1.12752	MAPK11;IRAK1;DDX58;MAPK1;PIK3R2;BRAF
Chagas disease	4/102	0.39196	0.406758	0.883585	0	0	1.27336	1.19263	MAPK11;IRAK1;MAPK1;PIK3R2
Longevity regulating pathway	4/102	0.39196	0.406758	0.883585	0	0	1.27336	1.19263	STK11;TSC2;PIK3R2;MTOR
Dopaminergic synapse	5/132	0.392064	0.406643	0.883585	0	0	1.22838	1.15017	MAPK11;GNG10;PPP3CB;GNB1;PPP2R5A
Kaposi sarcoma-associated herpesvirus infection	7/193	0.394034	0.404467	0.883585	0	0	1.17444	1.09378	MAPK11;GNG10;PPP3CB;GNB1;MAPK1;PIK3R2;MTOR
p53 signaling pathway	1973-03-01	0.397313	0.400867	0.883585	0	0	1.33681	1.23392	SIVA1;CCNG2;TSC2
Vasopressin-regulated water reabsorption	1944-02-01	0.399359	0.398636	0.883585	0	0	1.4851	1.36316	DCTN6;VAMP2
PPAR signaling pathway	1974-03-01	0.405719	0.391775	0.883585	0	0	1.31791	1.18888	SLC27A1;ACSL4;PPARD
C-type lectin receptor signaling pathway	4/104	0.406059	0.39141	0.883585	0	0	1.24777	1.12456	MAPK11;PPP3CB;MAPK1;PIK3R2
T cell receptor signaling pathway	4/104	0.406059	0.39141	0.883585	0	0	1.24777	1.12456	MAPK11;PPP3CB;MAPK1;PIK3R2
Toll-like receptor signaling pathway	4/104	0.406059	0.39141	0.883585	0	0	1.24777	1.12456	MAPK11;IRAK1;MAPK1;PIK3R2
ABC transporters	1945-02-01	0.410312	0.386886	0.883585	0	0	1.45049	1.29215	ABCD4;ABCA7
Glycosphingolipid biosynthesis	1945-02-01	0.410312	0.386886	0.883585	0	0	1.45049	1.29215	ST6GALNAC4;ST6GALNAC6
Phenylalanine metabolism	2023-01-17	0.415684	0.381237	0.883585	0	0	1.94867	1.7106	GOT1
Parathyroid hormone synthesis, secretion and action	4/106	0.420094	0.376653	0.883585	0	0	1.22317	1.06083	NR4A2;MAPK1;BRAF;ARHGEF1
Proteasome	1946-02-01	0.421166	0.375547	0.883585	0	0	1.41745	1.22571	PSMA6;PSMA4
Chronic myeloid leukemia	1976-03-01	0.422423	0.374253	0.883585	0	0	1.28167	1.10448	MAPK1;PIK3R2;BRAF
Pertussis	1976-03-01	0.422423	0.374253	0.883585	0	0	1.28167	1.10448	MAPK11;IRAK1;MAPK1
Glucagon signaling pathway	4/107	0.427083	0.369488	0.883585	0	0	1.21124	1.03049	LDHA;PPP3CB;PGAM1;PHKB
Leishmaniasis	1977-03-01	0.430715	0.36581	0.883585	0	0	1.26429	1.06492	MAPK11;IRAK1;MAPK1
Other types of O-glycan biosynthesis	1947-02-01	0.431916	0.364601	0.883585	0	0	1.38588	1.16348	LFNG;PLOD3
Fatty acid biosynthesis	2023-01-18	0.433872	0.362639	0.883585	0	0	1.83395	1.53136	ACSL4
Drug metabolism	4/108	0.434049	0.362461	0.883585	0	0	1.19953	1.00112	GSTM1;TK1;GUSB;ADH5
Insulin resistance	4/108	0.434049	0.362461	0.883585	0	0	1.19953	1.00112	SLC27A1;NR1H2;PIK3R2;MTOR
Antigen processing and presentation	1978-03-01	0.438964	0.357571	0.883585	0	0	1.24737	1.027	CANX;RFX5;RFXANK
Diabetic cardiomyopathy	7/203	0.4449	0.351737	0.883585	0	0	1.11394	0.902184	MAPK11;NDUFA6;COX4I1;PIK3R2;NDUFS1;COX6C;MTOR
Glycosaminoglycan degradation	2023-01-19	0.451494	0.345348	0.883585	0	0	1.73197	1.37725	GUSB
Ether lipid metabolism	1949-02-01	0.45309	0.343815	0.883585	0	0	1.32677	1.05035	LPCAT4;PAFAH2
Human papillomavirus infection	11/331	0.454551	0.342418	0.883585	0	0	1.07221	0.845377	LFNG;ATP6V0B;LAMB2;FN1;TSC2;PPP2R5A;MAPK1;PIK3R2;TCIRG1;MTOR;LLGL2
TNF signaling pathway	4/112	0.461663	0.335675	0.883585	0	0	1.15486	0.892615	MAPK11;CSF1;MAPK1;PIK3R2
Toxoplasmosis	4/112	0.461663	0.335675	0.883585	0	0	1.15486	0.892615	MAPK11;IRAK1;LAMB2;MAPK1
B cell receptor signaling pathway	1981-03-01	0.463425	0.33402	0.883585	0	0	1.1992	0.92232	PPP3CB;MAPK1;PIK3R2
N-Glycan biosynthesis	1950-02-01	0.463507	0.333944	0.883585	0	0	1.29906	0.998891	MAN2A2;MGAT4B
Vibrio cholerae infection	1950-02-01	0.463507	0.333944	0.883585	0	0	1.29906	0.998891	ATP6V0B;TCIRG1
Cholinergic synapse	4/113	0.468495	0.329295	0.883585	0	0	1.14421	0.867572	GNG10;GNB1;MAPK1;PIK3R2
Serotonergic synapse	4/113	0.468495	0.329295	0.883585	0	0	1.14421	0.867572	GNG10;GNB1;MAPK1;BRAF
Breast cancer	5/147	0.483527	0.315579	0.883585	0	0	1.09777	0.797691	JAG2;MAPK1;PIK3R2;BRAF;MTOR
Pantothenate and CoA biosynthesis	2023-01-21	0.485113	0.314157	0.883585	0	0	1.55862	1.12746	PPCDC
Phospholipase D signaling pathway	5/148	0.489478	0.310267	0.883585	0	0	1.09004	0.778739	TSC2;MAPK1;PIK3R2;DGKZ;MTOR
Endocrine and other factor-regulated calcium reabsorption	1953-02-01	0.49404	0.306238	0.883585	0	0	1.22245	0.862001	CLTA;AP2A2
Shigellosis	8/246	0.499352	0.301593	0.883585	0	0	1.04782	0.727652	MAPK11;CTTN;CBX3;MAPK1;PIK3R2;RBCK1;ARHGEF2;MTOR
Growth hormone synthesis, secretion and action	4/119	0.508769	0.29348	0.883585	0	0	1.08417	0.732641	MAPK11;MAPK1;PIK3R2;MTOR
Sphingolipid signaling pathway	4/119	0.508769	0.29348	0.883585	0	0	1.08417	0.732641	MAPK11;PPP2R5A;MAPK1;PIK3R2
Cardiac muscle contraction	1987-03-01	0.510863	0.291696	0.883585	0	0	1.1132	0.747686	CACNB3;COX4I1;COX6C
Salmonella infection	8/249	0.513096	0.289801	0.883585	0	0	1.03461	0.69039	DCTN6;MAPK11;ANXA2;IRAK1;EXOC7;FLNA;MAPK1;VPS39
Mannose type O-glycan biosynthesis	2023-01-23	0.516674	0.286783	0.883585	0	0	1.41678	0.935559	POMGNT2
Proximal tubule bicarbonate reclamation	2023-01-23	0.516674	0.286783	0.883585	0	0	1.41678	0.935559	GLS2
Renin-angiotensin system	2023-01-23	0.516674	0.286783	0.883585	0	0	1.41678	0.935559	THOP1
Alcoholism	6/186	0.521784	0.28251	0.883585	0	0	1.03885	0.675776	GNG10;HDAC10;GNB1;MAPK1;BRAF;SLC29A2
Thyroid hormone signaling pathway	4/121	0.521888	0.282423	0.883585	0	0	1.06553	0.692915	TSC2;MAPK1;PIK3R2;MTOR
Hedgehog signaling pathway	1956-02-01	0.523447	0.281127	0.883585	0	0	1.15436	0.74724	GRK2;CSNK1E
Pyrimidine metabolism	1956-02-01	0.523447	0.281127	0.883585	0	0	1.15436	0.74724	DCTD;TK1
Human T-cell leukemia virus 1 infection	7/219	0.524374	0.280359	0.883585	0	0	1.02901	0.664277	PPP3CB;XPO1;ESPL1;CANX;MAPK1;PIK3R2;ANAPC10
GABAergic synapse	1989-03-01	0.52618	0.278866	0.883585	0	0	1.0872	0.698104	GNG10;GLS2;GNB1
Glutathione metabolism	1957-02-01	0.532991	0.27328	0.889429	0	0	1.13331	0.713138	GCLC;GSTM1
Morphine addiction	1991-03-01	0.541228	0.26662	0.892018	0	0	1.06238	0.652211	GNG10;GRK2;GNB1
Small cell lung cancer	1992-03-01	0.548648	0.260706	0.892018	0	0	1.05039	0.630547	LAMB2;FN1;PIK3R2
GnRH signaling pathway	1993-03-01	0.555997	0.254928	0.892018	0	0	1.03866	0.609688	MAPK11;MAPK7;MAPK1
Rheumatoid arthritis	1993-03-01	0.555997	0.254928	0.892018	0	0	1.03866	0.609688	ATP6V0B;CSF1;TCIRG1
Long-term depression	1960-02-01	0.56083	0.251169	0.892018	0	0	1.07453	0.62144	MAPK1;BRAF
Mineral absorption	1960-02-01	0.56083	0.251169	0.892018	0	0	1.07453	0.62144	CLCN2;TRPM6
Biosynthesis of unsaturated fatty acids	2023-01-27	0.57412	0.240998	0.892018	0	0	1.19856	0.665104	HACD3
Collecting duct acid secretion	2023-01-27	0.57412	0.240998	0.892018	0	0	1.19856	0.665104	TCIRG1
Fatty acid elongation	2023-01-27	0.57412	0.240998	0.892018	0	0	1.19856	0.665104	HACD3
Pathogenic Escherichia coli infection	6/197	0.578116	0.237985	0.892018	0	0	0.978463	0.536178	MAPK11;CTTN;IRAK1;MAPK1;ARHGEF1;ARHGEF2
Circadian entrainment	1997-03-01	0.584663	0.233094	0.892018	0	0	0.99426	0.533638	GNG10;GNB1;MAPK1
Phosphatidylinositol signaling system	1997-03-01	0.584663	0.233094	0.892018	0	0	0.99426	0.533638	IMPA2;PIK3R2;DGKZ
Natural killer cell mediated cytotoxicity	4/131	0.584794	0.232997	0.892018	0	0	0.981118	0.526366	PPP3CB;MAPK1;PIK3R2;BRAF
Phototransduction	2023-01-28	0.587382	0.231079	0.892018	0	0	1.15411	0.614079	GNB1
Cytosolic DNA-sensing pathway	1963-02-01	0.587461	0.231021	0.892018	0	0	1.02152	0.543394	POLR3A;DDX58
Wnt signaling pathway	5/166	0.591488	0.228054	0.892018	0	0	0.967263	0.507923	PPP3CB;PRICKLE3;CSNK1E;SENP2;PPARD
Inflammatory mediator regulation of TRP channels	1998-03-01	0.591643	0.22794	0.892018	0	0	0.983743	0.516319	MAPK11;TRPV4;PIK3R2
GnRH secretion	1964-02-01	0.596068	0.224704	0.892018	0	0	1.00499	0.519984	MAPK1;PIK3R2
Ascorbate and aldarate metabolism	2023-01-30	0.612683	0.212764	0.892018	0	0	1.07441	0.52636	GUSB
Pentose phosphate pathway	2023-01-30	0.612683	0.212764	0.892018	0	0	1.07441	0.52636	ALDOA
Aminoacyl-tRNA biosynthesis	1966-02-01	0.612877	0.212627	0.892018	0	0	0.973488	0.476612	AARS2;TARS2
Amoebiasis	3/102	0.618795	0.208453	0.892018	0	0	0.9438	0.453007	LAMB2;FN1;PIK3R2
Pancreatic secretion	3/102	0.618795	0.208453	0.892018	0	0	0.9438	0.453007	RAP1A;SLC4A2;RAB8A
Apelin signaling pathway	4/137	0.620144	0.207507	0.892018	0	0	0.936565	0.447493	GNG10;GNB1;MAPK1;MTOR
Circadian rhythm	2023-01-31	0.624747	0.204296	0.892018	0	0	1.03854	0.488538	CSNK1E
Galactose metabolism	2023-01-31	0.624747	0.204296	0.892018	0	0	1.03854	0.488538	GALK1
RNA polymerase	2023-01-31	0.624747	0.204296	0.892018	0	0	1.03854	0.488538	POLR3A
NF-kappa B signaling pathway	3/104	0.631903	0.19935	0.897436	0	0	0.925015	0.4246	CARD10;IRAK1;DDX58
RIG-I-like receptor signaling pathway	1970-02-01	0.644876	0.190524	0.905508	0	0	0.916034	0.401861	MAPK11;DDX58
Base excision repair	1933-01-01	0.64776	0.188586	0.905508	0	0	0.973531	0.42274	XRCC1
SNARE interactions in vesicular transport	1933-01-01	0.64776	0.188586	0.905508	0	0	0.973531	0.42274	VAMP2
Signaling pathways regulating pluripotency of stem cells	4/143	0.653546	0.184724	0.908837	0	0	0.895858	0.381047	MAPK11;MAPK1;LIFR;PIK3R2
Pentose and glucuronate interconversions	1934-01-01	0.658733	0.18129	0.910662	0	0	0.943981	0.394052	GUSB
Nicotinate and nicotinamide metabolism	1935-01-01	0.669365	0.174337	0.910662	0	0	0.916169	0.367775	SIRT6
Axon guidance	5/182	0.671924	0.17268	0.910662	0	0	0.879094	0.349536	ENAH;PPP3CB;MAPK1;PIK3R2;SEMA3F
Regulation of actin cytoskeleton	6/218	0.675424	0.170423	0.910662	0	0	0.880575	0.34555	ENAH;FN1;MAPK1;PIK3R2;BRAF;ARHGEF1
Mucin type O-glycan biosynthesis	1936-01-01	0.679665	0.167705	0.910662	0	0	0.889947	0.343657	ST6GALNAC4
Starch and sucrose metabolism	1936-01-01	0.679665	0.167705	0.910662	0	0	0.889947	0.343657	AGL
Gastric cancer	4/149	0.684926	0.164357	0.910662	0	0	0.85852	0.324903	MAPK1;PIK3R2;BRAF;MTOR
Metabolism of xenobiotics by cytochrome P450	1976-02-01	0.688902	0.161843	0.910662	0	0	0.8415	0.31359	GSTM1;ADH5
African trypanosomiasis	1937-01-01	0.689646	0.161374	0.910662	0	0	0.865182	0.321482	THOP1
Adrenergic signaling in cardiomyocytes	4/150	0.689956	0.161178	0.910662	0	0	0.852596	0.316421	MAPK11;CACNB3;PPP2R5A;MAPK1
Leukocyte transendothelial migration	3/114	0.692687	0.159463	0.910662	0	0	0.841244	0.308886	MAPK11;RAP1A;PIK3R2
Arrhythmogenic right ventricular cardiomyopathy	1977-02-01	0.695787	0.157524	0.910662	0	0	0.830237	0.301137	CACNB3;LMNA
Neutrophil extracellular trap formation	5/189	0.703635	0.152653	0.916442	0	0	0.845342	0.297134	MAPK11;HDAC10;MAPK1;PIK3R2;MTOR
Oxytocin signaling pathway	4/154	0.709508	0.149043	0.919604	0	0	0.829687	0.284735	CACNB3;PPP3CB;MAPK7;MAPK1
Hepatitis C	4/157	0.723571	0.140519	0.932648	0	0	0.813292	0.263145	DDX58;MAPK1;PIK3R2;BRAF
Homologous recombination	1941-01-01	0.726557	0.13873	0.932648	0	0	0.778502	0.248683	UIMC1
Ras signaling pathway	6/232	0.731661	0.13569	0.934706	0	0	0.825422	0.257893	GNG10;RAP1A;CSF1;GNB1;MAPK1;PIK3R2
Fat digestion and absorption	1943-01-01	0.743335	0.128815	0.935414	0	0	0.741354	0.219892	SLC27A1
Porphyrin and chlorophyll metabolism	1943-01-01	0.743335	0.128815	0.935414	0	0	0.741354	0.219892	GUSB
JAK-STAT signaling pathway	4/162	0.745877	0.127333	0.935414	0	0	0.78735	0.230847	LIFR;PIK3R2;IL12RB1;MTOR
Hippo signaling pathway	4/163	0.750169	0.124841	0.935414	0	0	0.782357	0.224893	CSNK1E;AJUBA;TEAD2;LLGL2
Epstein-Barr virus infection	5/202	0.756708	0.121072	0.935414	0	0	0.789023	0.219962	NCOR2;MAPK11;IRAK1;DDX58;PIK3R2
Basal transcription factors	1945-01-01	0.759085	0.11971	0.935414	0	0	0.707583	0.195039	TAF1
ECM-receptor interaction	1988-02-01	0.763457	0.117215	0.935414	0	0	0.723631	0.195307	LAMB2;FN1
Gap junction	1988-02-01	0.763457	0.117215	0.935414	0	0	0.723631	0.195307	MAPK7;MAPK1
Pathways in cancer	14/531	0.772833	0.111914	0.935414	0	0	0.840037	0.216471	JAG2;GSTM1;LAMB2;FN1;BRAF;PIK3R2;MTOR;PML;GNG10;GNB1;MAPK1;ARHGEF1;IL12RB1;PPARD
Carbohydrate digestion and absorption	1947-01-01	0.77387	0.111332	0.935414	0	0	0.676749	0.173485	PIK3R2
Nucleotide excision repair	1947-01-01	0.77387	0.111332	0.935414	0	0	0.676749	0.173485	RAD23A
Hypertrophic cardiomyopathy	1990-02-01	0.774257	0.111115	0.935414	0	0	0.707111	0.180916	CACNB3;LMNA
Vascular smooth muscle contraction	3/133	0.786758	0.104159	0.937738	0	0	0.717584	0.172102	MAPK1;BRAF;ARHGEF1
Sphingolipid metabolism	1949-01-01	0.787749	0.103612	0.937738	0	0	0.648484	0.154713	SMPD4
Salivary secretion	1993-02-01	0.789648	0.102567	0.937738	0	0	0.683694	0.161467	SLC4A2;VAMP2
Parkinson disease	6/249	0.790229	0.102247	0.937738	0	0	0.766995	0.180576	PSMA6;PSMA4;NDUFA6;COX4I1;NDUFS1;COX6C
Arginine and proline metabolism	1950-01-01	0.794366	0.0999793	0.938477	0	0	0.635216	0.146234	GOT1
Dilated cardiomyopathy	1996-02-01	0.804107	0.0946863	0.944076	0	0	0.661771	0.144281	CACNB3;LMNA
Fc gamma R-mediated phagocytosis	1997-02-01	0.808727	0.0921983	0.944076	0	0	0.654771	0.139004	MAPK1;PIK3R2
Measles	3/139	0.811019	0.0909691	0.944076	0	0	0.685712	0.143632	IRAK1;DDX58;PIK3R2
Aldosterone synthesis and secretion	1998-02-01	0.813249	0.0897764	0.944076	0	0	0.647917	0.133936	NR4A2;DAGLA
Apoptosis	3/142	0.82225	0.0849964	0.948871	0	0	0.670808	0.131285	LMNA;MAPK1;PIK3R2
Regulation of lipolysis in adipocytes	1955-01-01	0.824487	0.083816	0.948871	0	0	0.576251	0.111213	PIK3R2
Viral myocarditis	1960-01-01	0.850202	0.0704777	0.963966	0	0	0.52728	0.0855674	EIF4G1
MicroRNAs in cancer	7/310	0.851735	0.0696956	0.963966	0	0	0.716547	0.114991	MAPK7;GLS2;MAPK1;PIK3R2;CDC25C;MTOR;CDC25B
Herpes simplex virus 1 infection	12/498	0.852835	0.0691348	0.963966	0	0	0.764704	0.121732	EIF2B5;NXF1;ZFP57;ZFP1;IRAK1;DDX58;TSC2;PIK3R2;RBAK;MTOR;PML;SRPK1
Glycerolipid metabolism	1961-01-01	0.854875	0.0680973	0.963966	0	0	0.518465	0.0812952	DGKZ
Phagosome	3/152	0.855655	0.0677012	0.963966	0	0	0.625462	0.0975019	ATP6V0B;CANX;TCIRG1
Cushing syndrome	3/155	0.864547	0.0632115	0.969891	0	0	0.613022	0.0892253	RAP1A;MAPK1;BRAF
Inflammatory bowel disease	1965-01-01	0.872155	0.0594063	0.974332	0	0	0.48596	0.0664736	IL12RB1
Mitophagy	1968-01-01	0.883753	0.0536692	0.975023	0	0	0.464129	0.0573561	ATG9A
Retinol metabolism	1968-01-01	0.883753	0.0536692	0.975023	0	0	0.464129	0.0573561	ADH5
Amphetamine addiction	1969-01-01	0.88738	0.0518902	0.975023	0	0	0.45728	0.0546365	PPP3CB
Renin secretion	1969-01-01	0.88738	0.0518902	0.975023	0	0	0.45728	0.0546365	PPP3CB
Adherens junction	1971-01-01	0.8943	0.0485168	0.978599	0	0	0.444168	0.0496199	MAPK1
Inositol phosphate metabolism	1973-01-01	0.900795	0.0453741	0.9795	0	0	0.431786	0.0451119	IMPA2
Thyroid hormone synthesis	1975-01-01	0.906891	0.0424447	0.9795	0	0	0.420072	0.0410547	CANX
cAMP signaling pathway	4/216	0.90703	0.0423784	0.9795	0	0	0.58515	0.0570989	RAP1A;MAPK1;PIK3R2;BRAF
Gastric acid secretion	1976-01-01	0.909798	0.041055	0.9795	0	0	0.41445	0.0391791	SLC4A2
NOD-like receptor signaling pathway	3/181	0.923418	0.0346015	0.987603	0	0	0.522771	0.0416507	MAPK11;MAPK1;RBCK1
Estrogen signaling pathway	2/137	0.929468	0.0317658	0.987603	0	0	0.459809	0.033632	MAPK1;PIK3R2
Insulin secretion	1986-01-01	0.934318	0.0295053	0.987603	0	0	0.365502	0.0248316	VAMP2
Transcriptional misregulation in cancer	3/192	0.940388	0.0266928	0.987603	0	0	0.492063	0.0302434	DDX5;CCNT2;PML
Chemical carcinogenesis	4/239	0.942029	0.0259359	0.987603	0	0	0.527246	0.031487	GSTM1;MAPK1;PIK3R2;MTOR
Bile secretion	1990-01-01	0.942148	0.0258809	0.987603	0	0	0.349002	0.0207981	SLC4A2
TGF-beta signaling pathway	1994-01-01	0.949046	0.0227128	0.987603	0	0	0.333922	0.0174635	MAPK1
Viral carcinogenesis	3/203	0.95382	0.0205338	0.987603	0	0	0.464733	0.021973	HDAC10;MAPK1;PIK3R2
Hematopoietic cell lineage	1999-01-01	0.956525	0.0193038	0.987603	0	0	0.316803	0.0140815	CSF1
Viral protein interaction with cytokine and cytokine receptor	1/100	0.957884	0.0186873	0.987603	0	0	0.313587	0.0134934	CSF1
Melanogenesis	1/101	0.9592	0.0180909	0.987603	0	0	0.310435	0.0129314	MAPK1
Protein digestion and absorption	1/103	0.961711	0.0169556	0.987603	0	0	0.304316	0.011881	COL7A1
cGMP-PKG signaling pathway	2/167	0.967971	0.0141374	0.990224	0	0	0.375621	0.0122275	PPP3CB;MAPK1
Purine metabolism	1/129	0.983241	0.00734024	0.999462	0	0	0.242175	0.00409313	PFAS
Cell adhesion molecules	1/148	0.990843	0.00399536	0.999462	0	0	0.210665	0.00193805	CNTNAP1
Necroptosis	1/159	0.993548	0.00281128	0.999462	0	0	0.195887	0.00126801	RBCK1
Cytokine-cytokine receptor interaction	3/295	0.99527	0.00205927	0.999462	0	0	0.316784	0.00150207	CSF1;LIFR;IL12RB1
Calcium signaling pathway	2/240	0.995719	0.00186327	0.999462	0	0	0.25942	0.001113	PPP3CB;PHKB
Olfactory transduction	2/440	0.999984	6.86757e-06	0.999984	0	0	0.13949	2.20579e-06	GRK2;GNB1

## Sheet: A5SS
Term	Overlap	P-value		Adjusted P-value	Old P-value	Old Adjusted P-value	Odds Ratio	Combined Score	Genes
Spliceosome	20/150	3.54029e-07	6.45096	9.31096e-05	0	0	4.28488	63.6472	TCERG1;PRPF38B;RBM25;SF3B3;BUD31;THOC1;HNRNPU;PRPF40B;PQBP1;HNRNPK;DDX39B;SNRNP70;U2AF2;TRA2A;SRSF2;SNRNP27;DHX38;ACIN1;SNRPE;HNRNPC
Ribosome	14/158	0.00149618	2.82502	0.135927	0	0	2.68244	17.4488	MRPS17;RPS9;RPL34;RPS5;RPL13A;RPL23A;MRPL23;MRPL32;RPS19;RPL36AL;RPL27A;RPL37;RPL39;RPL19
Ribosome biogenesis in eukaryotes	11/108	0.0015505	2.80953	0.135927	0	0	3.12303	20.2034	NOP56;LSG1;REXO1;TCOF1;WDR3;CSNK2B;FCF1;SBDS;RIOK1;UTP18;REXO5
Fanconi anemia pathway	1954-07-01	0.00281978	2.54979	0.1854	0	0	4.08884	24.006	MUS81;SLX4;ERCC4;BRCA2;ATRIP;FANCG;FAAP100
RNA transport	14/186	0.0065545	2.18346	0.305923	0	0	2.24248	11.2743	EIF4A1;GEMIN2;PABPC4;THOC1;THOC7;DDX39B;SUMO1;NUP85;ACIN1;RNPS1;NUP54;EIF3E;TARDBP;EIF4G1
Oxidative phosphorylation	11/133	0.00770181	2.11341	0.305923	0	0	2.47983	12.0676	ATP6V1G1;COX7A2L;ATP6V1G2;COX15;NDUFS6;COX4I1;NDUFS5;NDUFA10;ATP6V0A2;NDUFS3;TCIRG1
Vibrio cholerae infection	1950-06-01	0.00814245	2.08924	0.305923	0	0	3.73893	17.9867	ATP6V1G1;ATP6V1G2;KDELR1;ATP6V0A2;TCIRG1;SEC61B
Colorectal cancer	1986-08-01	0.0111319	1.95343	0.365961	0	0	2.81524	12.6628	TCF7L2;CDKN1A;RPS6KB1;CASP3;AKT1;RAC3;BAX;BBC3
Viral carcinogenesis	14/203	0.0135356	1.86852	0.376005	0	0	2.03896	8.77248	VAC14;CDKN1A;TBP;HDAC3;HDAC10;CHD4;GTF2E1;DDB1;KAT2A;HNRNPK;PKM;CASP3;MDM2;BAX
Collecting duct acid secretion	2023-04-27	0.0142968	1.84476	0.376005	0	0	4.76013	20.2197	ATP6V1G1;ATP6V1G2;ATP6V0A2;TCIRG1
Chronic myeloid leukemia	1976-07-01	0.0179267	1.7465	0.392893	0	0	2.78197	11.1876	CDKN1A;CTBP2;CTBP1;SHC1;MDM2;AKT1;BAX
Pancreatic cancer	1976-07-01	0.0179267	1.7465	0.392893	0	0	2.78197	11.1876	CDKN1A;RPS6KB1;AKT1;RAC3;BAX;BRCA2;PLD2
Lysine degradation	1963-06-01	0.0237377	1.62456	0.480232	0	0	2.88424	10.7891	KMT2D;KMT2A;KMT5C;EHMT1;ASH1L;EZH2
Ubiquitin mediated proteolysis	10/140	0.0272786	1.56418	0.512449	0	0	2.11175	7.60578	DDB1;UBE2S;UBE2D3;MDM2;UBA3;HUWE1;SYVN1;ELOC;RNF7;UBE2M
Renal cell carcinoma	1969-06-01	0.0351471	1.45411	0.527774	0	0	2.60874	8.73461	FLCN;CDKN1A;TFE3;AKT1;PAK6;ELOC
Hepatocellular carcinoma	11/168	0.0369463	1.43243	0.527774	0	0	1.92348	6.34421	TCF7L2;CDKN1A;SMARCC2;PHF10;RPS6KB1;SHC1;DVL1;AKT1;MGST2;BAX;SMARCA4
Thermogenesis	14/232	0.0371399	1.43016	0.527774	0	0	1.76504	5.81238	KDM3A;SMARCC2;COX15;COX4I1;NDUFA10;ADCY6;SMARCA4;COX7A2L;RPS6KB1;NDUFS6;NDUFS5;NDUFAF2;NDUFS3;PRKG2
Lysosome	9/128	0.0382737	1.4171	0.527774	0	0	2.07448	6.769	AP4M1;CD164;CLN3;ASAH1;AP1G2;HEXA;ATP6V0A2;PPT2;TCIRG1
HIF-1 signaling pathway	8/109	0.0397226	1.40096	0.527774	0	0	2.17154	7.00504	LDHA;CDKN1A;RPS6KB1;IFNGR2;AKT1;ENO1;ELOC;ALDOA
Phagosome	10/152	0.0440835	1.35572	0.527774	0	0	1.93208	6.03132	DYNC2H1;ATP6V1G1;ATP6V1G2;ATP6V0A2;TCIRG1;SEC61B;TUBB4B;TUBA4A;TLR2;THBS3
p53 signaling pathway	1973-06-01	0.0444299	1.35232	0.527774	0	0	2.45248	7.63664	CDKN1A;CASP3;MDM2;BAX;MDM4;BBC3
Small cell lung cancer	1992-07-01	0.0446278	1.35039	0.527774	0	0	2.25642	7.01612	ZBTB17;CDKN1A;CASP3;FN1;AKT1;BAX;CKS1B
Human papillomavirus infection	18/331	0.0481215	1.31766	0.527774	0	0	1.5818	4.79923	TCF7L2;PATJ;ATP6V1G1;CDKN1A;ATP6V1G2;TBP;FN1;CHD4;TCIRG1;THBS3;PKM;RPS6KB1;CASP3;DVL1;ATP6V0A2;MDM2;AKT1;BAX
Various types of N-glycan biosynthesis	1939-04-01	0.0481619	1.3173	0.527774	0	0	3.12614	9.48216	B4GALT2;RPN2;HEXA;MGAT4B
Bacterial invasion of epithelial cells	1977-06-01	0.0551111	1.25876	0.539914	0	0	2.31383	6.70642	ACTR3;DNM3;MAD2L2;ARHGAP10;SHC1;FN1
Notch signaling pathway	1959-05-01	0.0573381	1.24156	0.539914	0	0	2.53385	7.24375	KAT2A;TLE1;CTBP2;CTBP1;DVL1
Synaptic vesicle cycle	1978-06-01	0.0580032	1.23655	0.539914	0	0	2.28158	6.49624	DNM3;NAPA;ATP6V1G1;ATP6V1G2;ATP6V0A2;TCIRG1
Glycerophospholipid metabolism	1998-07-01	0.0590447	1.22882	0.539914	0	0	2.10699	5.96165	PCYT2;PNPLA7;MBOAT2;PNPLA6;TAZ;AGPAT1;PLD2
Amyotrophic lateral sclerosis	19/364	0.0601731	1.2206	0.539914	0	0	1.51445	4.25642	DAXX;DCTN2;COX4I1;NDUFA10;TUBB4B;TUBA4A;ATXN2L;COX7A2L;NUP85;NDUFS6;CASP3;NDUFS5;PSMB1;HNRNPA2B1;NDUFS3;BAX;NUP54;TARDBP;SPG11
Porphyrin and chlorophyll metabolism	1943-04-01	0.0648162	1.18832	0.539914	0	0	2.80492	7.67483	COX15;HMBS;HCCS;BLVRA
Apoptosis	9/142	0.0656177	1.18298	0.539914	0	0	1.85475	5.05219	DAXX;CASP3;AKT1;HTRA2;BAX;RIPK1;CFLAR;TUBA4A;BBC3
Thyroid hormone signaling pathway	8/121	0.065693	1.18248	0.539914	0	0	1.93972	5.2814	PFKFB2;MED12;KAT2A;NCOR1;HDAC3;NCOA3;MDM2;AKT1
Basal cell carcinoma	1963-05-01	0.0719432	1.14301	0.546127	0	0	2.35861	6.20758	TCF7L2;CDKN1A;PTCH1;DVL1;BAX
Basal transcription factors	1945-04-01	0.0741312	1.13	0.546127	0	0	2.66782	6.94146	TBP;TAF11;TAF8;GTF2E1
Glycosphingolipid biosynthesis	1945-04-01	0.0741312	1.13	0.546127	0	0	2.66782	6.94146	B4GALT2;HEXA;B4GALNT1;ST6GALNAC6
Human immunodeficiency virus 1 infection	12/212	0.0747551	1.12636	0.546127	0	0	1.64586	4.26861	DDB1;AP1G2;RPS6KB1;CASP3;AKT1;RAC3;PAK6;BAX;RIPK1;ELOC;RNF7;TLR2
Breast cancer	9/147	0.0777685	1.1092	0.552787	0	0	1.78709	4.56426	TCF7L2;CDKN1A;RPS6KB1;SHC1;NCOA3;DVL1;AKT1;BAX;BRCA2
Amino sugar and nucleotide sugar metabolism	1948-04-01	0.0892919	1.04919	0.603696	0	0	2.48554	6.00467	NAGK;HEXA;GMPPA;RENBP
Pathways in cancer	25/531	0.0911956	1.04003	0.603696	0	0	1.35895	3.25434	CDKN1A;CTBP2;CTBP1;MGST2;BRCA2;ADCY6;BBC3;PLD2;CKS1B;CASP3;DVL1;AKT1;RAC3;ELOC;ZBTB17;TCF7L2;JUP;IFNGR2;NCOA3;PTCH1;FN1;EPOR;RPS6KB1;MDM2;BAX
Gap junction	1988-06-01	0.0918168	1.03708	0.603696	0	0	2.00229	4.7814	GJA1;MAPK7;PRKG2;TUBB4B;TUBA4A;ADCY6
Non-alcoholic fatty liver disease	9/155	0.099882	1.00051	0.623114	0	0	1.68846	3.88981	COX7A2L;NDUFS6;COX4I1;CASP3;NDUFS5;NDUFA10;NDUFS3;AKT1;BAX
Epithelial cell signaling in Helicobacter pylori infection	1970-05-01	0.101898	0.991834	0.623114	0	0	2.10384	4.80471	ATP6V1G1;ATP6V1G2;CASP3;ATP6V0A2;TCIRG1
Parkinson disease	13/249	0.105866	0.975243	0.623114	0	0	1.51035	3.39162	DAXX;COX4I1;NDUFA10;HTRA2;TUBB4B;TUBA4A;COX7A2L;NDUFS6;CASP3;NDUFS5;PSMB1;NDUFS3;BAX
Salmonella infection	13/249	0.105866	0.975243	0.623114	0	0	1.51035	3.39162	DYNC2H1;ACTR3;TCF7L2;DCTN2;TUBB4B;TUBA4A;CASP3;AKT1;PLEKHM2;BAX;RIPK1;VPS16;TLR2
Adherens junction	1971-05-01	0.106616	0.972176	0.623114	0	0	2.07186	4.63789	TCF7L2;CTNND1;CSNK2B;RAC3;IQGAP1
Fructose and mannose metabolism	1933-03-01	0.110301	0.957419	0.630636	0	0	2.7322	6.02324	PFKFB2;GMPPA;ALDOA
Proteoglycans in cancer	11/205	0.112737	0.947933	0.630848	0	0	1.55362	3.39109	CDKN1A;TFAP4;RPS6KB1;PTCH1;CASP3;FN1;MDM2;AKT1;IQGAP1;CD44;TLR2
Coronavirus disease	12/232	0.122688	0.911196	0.648648	0	0	1.49467	3.13598	RPS9;RPS19;RPL36AL;RPL34;RPL27A;RPS5;RPL13A;RPL23A;RPL37;RPL39;TLR2;RPL19
Glioma	1975-05-01	0.126525	0.897824	0.648648	0	0	1.95306	4.03759	CDKN1A;SHC1;MDM2;AKT1;BAX
Huntington disease	15/306	0.128358	0.891576	0.648648	0	0	1.41332	2.90145	TBP;DCTN2;COX4I1;NDUFA10;TUBB4B;TUBA4A;BBC3;COX7A2L;NDUFS6;CASP3;NDUFS5;PSMB1;NDUFS3;BAX;POLR2G
DNA replication	1936-03-01	0.133849	0.873386	0.648648	0	0	2.48343	4.99429	RFC3;RNASEH2A;MCM3
mRNA surveillance pathway	1998-06-01	0.134208	0.872221	0.648648	0	0	1.78372	3.58236	CPSF6;DDX39B;PABPC4;ACIN1;RNPS1;TARDBP
Wnt signaling pathway	9/166	0.135565	0.867853	0.648648	0	0	1.56926	3.13585	TCF7L2;PORCN;TLE1;CTBP2;CTBP1;RUVBL1;CSNK2B;DVL1;RAC3
Pyrimidine metabolism	1956-04-01	0.136122	0.866072	0.648648	0	0	2.10227	4.19236	NUDT2;CTPS2;TK1;TYMS
Arrhythmogenic right ventricular cardiomyopathy	1977-05-01	0.137074	0.863045	0.648648	0	0	1.89861	3.77298	TCF7L2;GJA1;CACNB3;JUP;EMD
Thyroid cancer	1937-03-01	0.142055	0.847544	0.648648	0	0	2.41026	4.70373	TCF7L2;CDKN1A;BAX
Legionellosis	1957-04-01	0.142566	0.845984	0.648648	0	0	2.0625	4.01765	EEF1G;SAR1A;CASP3;TLR2
Transcriptional misregulation in cancer	10/192	0.144669	0.839625	0.648648	0	0	1.5043	2.90827	ELK4;ZBTB17;CDKN1A;NCOR1;KMT2A;JUP;TFE3;MDM2;SIX1;BAX
RNA degradation	1979-05-01	0.147997	0.829748	0.648648	0	0	1.8471	3.52901	EXOSC7;PAN2;PNPT1;PABPC4;ENO1
Endometrial cancer	1958-04-01	0.149128	0.82644	0.648648	0	0	2.0242	3.85195	TCF7L2;CDKN1A;AKT1;BAX
Cell cycle	7/124	0.150825	0.821526	0.648648	0	0	1.63655	3.09575	ORC5;MAD2L2;ZBTB17;CDKN1A;MDM2;MCM3;CDC7
Protein processing in endoplasmic reticulum	9/171	0.153711	0.813294	0.648648	0	0	1.52043	2.84727	DNAJA1;RPN2;SAR1A;UBE2D3;SYVN1;BAX;PREB;SEC61B;TXNDC5
Human T-cell leukemia virus 1 infection	11/219	0.15538	0.808606	0.648648	0	0	1.44799	2.69599	ELK4;VAC14;CDKN1A;KAT2A;TBP;TRRAP;AKT1;TSPO;BAX;TLN1;ADCY6
Gastric cancer	8/149	0.159195	0.798069	0.654194	0	0	1.55226	2.85247	TCF7L2;CDKN1A;JUP;RPS6KB1;SHC1;DVL1;AKT1;BAX
Pantothenate and CoA biosynthesis	2023-02-21	0.169266	0.77143	0.684877	0	0	2.87356	5.10427	PANK2;COASY
Purine metabolism	7/129	0.173529	0.760628	0.691487	0	0	1.56907	2.74808	NUDT9;PKM;AK1;NUDT2;PAICS;ADCY6;PAPSS1
ErbB signaling pathway	1985-05-01	0.182824	0.737967	0.717653	0	0	1.70804	2.90235	CDKN1A;RPS6KB1;SHC1;AKT1;PAK6
Phosphonate and phosphinate metabolism	2023-01-06	0.194488	0.711106	0.752212	0	0	5.45601	8.93358	PCYT2
Vasopressin-regulated water reabsorption	1944-03-01	0.203517	0.691399	0.775725	0	0	1.99803	3.18087	DYNC2H1;DCTN2;ADCY6
PD-L1 expression and PD-1 checkpoint pathway in cancer	1989-05-01	0.207557	0.682862	0.77721	0	0	1.62636	2.55721	RPS6KB1;IFNGR2;CSNK2B;AKT1;TLR2
Acute myeloid leukemia	1967-04-01	0.212772	0.672085	0.77721	0	0	1.73422	2.68376	TCF7L2;JUP;RPS6KB1;AKT1
Glycolysis / Gluconeogenesis	1967-04-01	0.212772	0.672085	0.77721	0	0	1.73422	2.68376	LDHA;PKM;ENO1;ALDOA
Measles	7/139	0.222897	0.651896	0.803039	0	0	1.44944	2.17568	CASP3;CSNK2B;RACK1;AKT1;BAX;BBC3;TLR2
Nucleotide excision repair	1947-03-01	0.231499	0.635452	0.810753	0	0	1.86151	2.72372	DDB1;RFC3;ERCC4
Rheumatoid arthritis	1993-05-01	0.233305	0.632076	0.810753	0	0	1.55211	2.25896	ATP6V1G1;ATP6V1G2;ATP6V0A2;TCIRG1;TLR2
Spinocerebellar ataxia	7/143	0.243902	0.612785	0.810753	0	0	1.40652	1.98459	ATXN2L;NOP56;TBP;PSMB1;AKT1;VLDLR;PUM2
Sphingolipid signaling pathway	6/119	0.246145	0.608808	0.810753	0	0	1.45065	2.03356	CERS5;ASAH1;AKT1;RAC3;BAX;PLD2
Fatty acid elongation	2023-02-27	0.247628	0.6062	0.810753	0	0	2.18323	3.04741	TECR;PPT2
Melanoma	1972-04-01	0.250914	0.600475	0.810753	0	0	1.60628	2.22092	CDKN1A;MDM2;AKT1;BAX
Shigellosis	11/246	0.256401	0.59108	0.810753	0	0	1.27981	1.74184	ACTR3;RPS6KB1;UBE2D3;MDM2;AKT1;BAX;RIPK1;UBE2V1;TLN1;TECPR1;CD44
Inositol phosphate metabolism	1973-04-01	0.258714	0.58718	0.810753	0	0	1.58292	2.14016	SACM1L;INPP5E;INPPL1;PI4KA
Fc gamma R-mediated phagocytosis	1997-05-01	0.259892	0.585208	0.810753	0	0	1.48432	2.00011	ACTR3;RPS6KB1;INPPL1;AKT1;PLD2
Phosphatidylinositol signaling system	1997-05-01	0.259892	0.585208	0.810753	0	0	1.48432	2.00011	PIP4P1;SACM1L;INPP5E;INPPL1;PI4KA
N-Glycan biosynthesis	1950-03-01	0.26012	0.584827	0.810753	0	0	1.74242	2.34636	B4GALT2;RPN2;MGAT4B
Prion disease	12/273	0.26203	0.581648	0.810753	0	0	1.25717	1.68372	COX7A2L;NDUFS6;COX4I1;CASP3;NDUFS5;CSNK2B;PSMB1;NDUFA10;NDUFS3;BAX;TUBB4B;TUBA4A
Pentose phosphate pathway	1930-02-01	0.287419	0.541485	0.872866	0	0	1.94901	2.43005	PGD;ALDOA
Longevity regulating pathway	5/102	0.294037	0.531597	0.872866	0	0	1.40744	1.72278	RPS6KB1;EHMT1;AKT1;BAX;ADCY6
Galactose metabolism	1931-02-01	0.300648	0.521941	0.872866	0	0	1.8817	2.26146	B4GALT2;GANC
RNA polymerase	1931-02-01	0.300648	0.521941	0.872866	0	0	1.8817	2.26146	POLR2G;POLR3H
Sulfur metabolism	2023-01-10	0.302672	0.519028	0.872866	0	0	3.03049	3.62175	PAPSS1
mTOR signaling pathway	7/154	0.304438	0.516501	0.872866	0	0	1.30052	1.5467	FLCN;ATP6V1G1;ATP6V1G2;RPS6KB1;DVL1;AKT1;CASTOR1
Tuberculosis	8/180	0.306513	0.513551	0.872866	0	0	1.27043	1.50228	CASP3;IFNGR2;RFX5;ATP6V0A2;AKT1;BAX;TCIRG1;TLR2
Regulation of lipolysis in adipocytes	1955-03-01	0.308656	0.510525	0.872866	0	0	1.57447	1.85083	AKT1;PRKG2;ADCY6
Hedgehog signaling pathway	1956-03-01	0.318422	0.496997	0.88998	0	0	1.54468	1.7677	PTCH1;IQCE;EFCAB7
Hepatitis C	7/157	0.321476	0.492852	0.88998	0	0	1.27431	1.44613	CDKN1A;CASP3;AKT1;BAX;RIPK1;EIF3E;CFLAR
Pathways of neurodegeneration	19/475	0.325019	0.488092	0.890416	0	0	1.13909	1.28019	DAXX;DCTN2;COX4I1;NDUFA10;HTRA2;TUBB4B;TUBA4A;ATXN2L;COX7A2L;NDUFS6;CASP3;NDUFS5;PSMB1;DVL1;CSNK2B;NDUFS3;BAX;TARDBP;SPG11
Glucagon signaling pathway	5/107	0.328881	0.482961	0.891709	0	0	1.3381	1.48805	LDHA;PKM;PRMT1;AKT1;PHKB
Viral myocarditis	1960-03-01	0.357461	0.446771	0.959309	0	0	1.43598	1.47724	CASP3;RAC3;EIF4G1
Glycerolipid metabolism	1961-03-01	0.367184	0.435116	0.975449	0	0	1.41115	1.41382	DGAT1;MBOAT2;AGPAT1
Glutamatergic synapse	5/114	0.378222	0.422254	0.987012	0	0	1.25171	1.21701	GRIK5;HOMER3;SLC38A2;ADCY6;PLD2
ECM-receptor interaction	1988-04-01	0.379043	0.421312	0.987012	0	0	1.29924	1.2604	FN1;AGRN;CD44;THBS3
Pathogenic Escherichia coli infection	8/197	0.397246	0.40094	0.999996	0	0	1.15513	1.06642	ACTR3;CASP3;BAX;RIPK1;TUBB4B;ABCF2;MYO1H;TUBA4A
Human cytomegalovirus infection	9/225	0.402404	0.395338	0.999996	0	0	1.1371	1.0351	CDKN1A;RPS6KB1;CASP3;MDM2;AKT1;RAC3;BAX;RIPK1;ADCY6
Thiamine metabolism	2023-01-15	0.417728	0.379106	0.999996	0	0	1.94767	1.70016	AK1
Epstein-Barr virus infection	8/202	0.424222	0.372407	0.999996	0	0	1.12507	0.964742	CDKN1A;CASP3;MDM2;AKT1;BAX;RIPK1;CD44;TLR2
Phospholipase D signaling pathway	6/148	0.426807	0.369769	0.999996	0	0	1.15264	0.981388	DNM3;SHC1;AKT1;AGPAT1;ADCY6;PLD2
Bladder cancer	1941-02-01	0.428685	0.367861	0.999996	0	0	1.39849	1.18456	CDKN1A;MDM2
Homologous recombination	1941-02-01	0.428685	0.367861	0.999996	0	0	1.39849	1.18456	MUS81;BRCA2
Alzheimer disease	14/369	0.433974	0.362536	0.999996	0	0	1.0761	0.898293	COX4I1;NDUFA10;TUBB4B;TUBA4A;RTN4;COX7A2L;NDUFS6;CASP3;NDUFS5;CSNK2B;PSMB1;DVL1;NDUFS3;AKT1
Mitophagy	1968-03-01	0.434245	0.362265	0.999996	0	0	1.25872	1.04996	BNIP3L;TFE3;CSNK2B
Prostate cancer	1997-04-01	0.450926	0.345895	0.999996	0	0	1.17296	0.934205	TCF7L2;CDKN1A;MDM2;AKT1
Fat digestion and absorption	1943-02-01	0.452877	0.34402	0.999996	0	0	1.33013	1.05365	DGAT1;AGPAT1
Central carbon metabolism in cancer	1970-03-01	0.452948	0.343952	0.999996	0	0	1.22102	0.967024	LDHA;PKM;AKT1
Prolactin signaling pathway	1970-03-01	0.452948	0.343952	0.999996	0	0	1.22102	0.967024	SHC1;AKT1;SOCS6
Selenocompound metabolism	2023-01-17	0.458254	0.338893	0.999996	0	0	1.70403	1.32971	PAPSS1
Choline metabolism in cancer	1998-04-01	0.458768	0.338407	0.999996	0	0	1.16042	0.904213	RPS6KB1;AKT1;RAC3;PLD2
Cushing syndrome	6/155	0.470659	0.327294	0.999996	0	0	1.09809	0.827544	KMT2D;TCF7L2;CDKN1A;KMT2A;DVL1;ADCY6
Non-small cell lung cancer	1972-03-01	0.471389	0.32662	0.999996	0	0	1.18551	0.891586	CDKN1A;AKT1;BAX
AGE-RAGE signaling pathway in diabetic complications	4/100	0.474333	0.323917	0.999996	0	0	1.13613	0.847375	CASP3;FN1;AKT1;BAX
Other glycan degradation	2023-01-18	0.477448	0.321074	0.999996	0	0	1.60371	1.18562	HEXA
Proteasome	1946-02-01	0.488034	0.31155	0.999996	0	0	1.23925	0.888999	PSMB1;PSMB10
Chagas disease	4/102	0.489726	0.310046	0.999996	0	0	1.11282	0.794455	IFNGR2;AKT1;CFLAR;TLR2
Glycosaminoglycan degradation	2023-01-19	0.495963	0.30455	0.999996	0	0	1.51454	1.06207	HEXA
FoxO signaling pathway	5/131	0.49628	0.304274	0.999996	0	0	1.08187	0.757976	CDKN1A;PRMT1;MDM2;AKT1;HOMER3
Pyruvate metabolism	1947-02-01	0.499436	0.30152	0.999996	0	0	1.21165	0.841217	LDHA;PKM
NF-kappa B signaling pathway	4/104	0.504931	0.296768	0.999996	0	0	1.09045	0.745144	CYLD;CSNK2B;RIPK1;CFLAR
Hepatitis B	6/162	0.513537	0.289428	0.999996	0	0	1.04843	0.698711	DDB1;CDKN1A;CASP3;AKT1;BAX;TLR2
JAK-STAT signaling pathway	6/162	0.513537	0.289428	0.999996	0	0	1.04843	0.698711	CDKN1A;IFNGR2;AKT1;STAM;SOCS6;EPOR
One carbon pool by folate	2023-01-20	0.513823	0.289186	0.999996	0	0	1.43475	0.955366	TYMS
Steroid biosynthesis	2023-01-20	0.513823	0.289186	0.999996	0	0	1.43475	0.955366	DHCR7
Sphingolipid metabolism	1949-02-01	0.521743	0.282543	0.999996	0	0	1.15997	0.754651	CERS5;ASAH1
Cysteine and methionine metabolism	1950-02-01	0.532644	0.273563	0.999996	0	0	1.13574	0.715405	LDHA;ADI1
Malaria	1950-02-01	0.532644	0.273563	0.999996	0	0	1.13574	0.715405	TLR2;THBS3
Insulin signaling pathway	5/137	0.536049	0.270795	0.999996	0	0	1.03237	0.643714	RPS6KB1;SHC1;INPPL1;AKT1;PHKB
Terpenoid backbone biosynthesis	2023-01-22	0.547669	0.261482	0.999996	0	0	1.29797	0.781488	PDSS1
Fluid shear stress and atherosclerosis	5/139	0.548986	0.260439	0.999996	0	0	1.01686	0.609792	MAPK7;SUMO1;AKT1;MGST2;RAC3
B cell receptor signaling pathway	1981-03-01	0.550513	0.259232	0.999996	0	0	1.04823	0.625691	INPPL1;AKT1;RAC3
TNF signaling pathway	4/112	0.563577	0.249047	0.999996	0	0	1.00926	0.578761	CASP3;AKT1;RIPK1;CFLAR
Toxoplasmosis	4/112	0.563577	0.249047	0.999996	0	0	1.00926	0.578761	CASP3;IFNGR2;AKT1;TLR2
Mannose type O-glycan biosynthesis	2023-01-23	0.563699	0.248952	0.999996	0	0	1.23891	0.710185	B4GALT2
Mismatch repair	2023-01-23	0.563699	0.248952	0.999996	0	0	1.23891	0.710185	RFC3
Protein export	2023-01-23	0.563699	0.248952	0.999996	0	0	1.23891	0.710185	SEC61B
Endocrine and other factor-regulated calcium reabsorption	1953-02-01	0.564314	0.248479	0.999996	0	0	1.06877	0.611489	DNM3;ADCY6
Glycosaminoglycan biosynthesis	1953-02-01	0.564314	0.248479	0.999996	0	0	1.06877	0.611489	B4GALT2;XYLT2
Focal adhesion	7/201	0.571101	0.243287	0.999996	0	0	0.983029	0.550682	SHC1;FN1;AKT1;RAC3;PAK6;TLN1;THBS3
Diabetic cardiomyopathy	7/203	0.581615	0.235364	0.999996	0	0	0.972896	0.527257	COX7A2L;NDUFS6;COX4I1;NDUFS5;NDUFA10;NDUFS3;AKT1
Cardiac muscle contraction	1987-03-01	0.599199	0.222429	0.999996	0	0	0.97305	0.498359	CACNB3;COX7A2L;COX4I1
Glutathione metabolism	1957-02-01	0.604092	0.218897	0.999996	0	0	0.990832	0.499407	MGST2;PGD
Retrograde endocannabinoid signaling	5/148	0.604912	0.218308	0.999996	0	0	0.952412	0.478751	NDUFS6;NDUFS5;NDUFA10;NDUFS3;ADCY6
Folate biosynthesis	2023-01-26	0.608465	0.215764	0.999996	0	0	1.09007	0.541564	PTS
Neurotrophin signaling pathway	4/119	0.611621	0.213518	0.999996	0	0	0.94748	0.465822	MAPK7;SHC1;AKT1;BAX
Biosynthesis of unsaturated fatty acids	2023-01-27	0.622344	0.20597	0.999996	0	0	1.04809	0.497071	TECR
VEGF signaling pathway	1959-02-01	0.622926	0.205563	0.999996	0	0	0.955966	0.452485	AKT1;RAC3
Oxytocin signaling pathway	5/154	0.639904	0.193885	0.999996	0	0	0.913773	0.407942	CACNB3;MYL6;CDKN1A;MAPK7;ADCY6
Platelet activation	4/124	0.643868	0.191203	0.999996	0	0	0.907765	0.399655	AKT1;PRKG2;TLN1;ADCY6
GnRH signaling pathway	1993-03-01	0.644296	0.190915	0.999996	0	0	0.907896	0.399109	MAPK7;ADCY6;PLD2
Cytosolic DNA-sensing pathway	1963-02-01	0.658499	0.181445	0.999996	0	0	0.893094	0.373128	RIPK1;POLR3H
Glyoxylate and dicarboxylate metabolism	2023-01-30	0.6611	0.179733	0.999996	0	0	0.939521	0.388821	HYI
beta-Alanine metabolism	2023-01-30	0.6611	0.179733	0.999996	0	0	0.939521	0.388821	SMOX
MicroRNAs in cancer	10/310	0.662226	0.178994	0.999996	0	0	0.906972	0.373807	CDKN1A;HNRNPK;MAPK7;SHC1;CASP3;MDM2;MDM4;SLC7A1;CD44;EZH2
Dilated cardiomyopathy	1996-03-01	0.665457	0.17688	0.999996	0	0	0.878472	0.357785	CACNB3;EMD;ADCY6
GnRH secretion	1964-02-01	0.666961	0.1759	0.999996	0	0	0.878644	0.355871	AKT1;KCNN1
Necroptosis	5/159	0.667551	0.175516	0.999996	0	0	0.883874	0.357209	CYLD;IFNGR2;BAX;RIPK1;CFLAR
Circadian rhythm	2023-01-31	0.673115	0.171911	0.999996	0	0	0.908157	0.359484	BHLHE40
Inflammatory bowel disease	1965-02-01	0.675253	0.170534	0.999996	0	0	0.864652	0.339521	IFNGR2;TLR2
Natural killer cell mediated cytotoxicity	4/131	0.685961	0.163701	0.999996	0	0	0.857418	0.32319	SHC1;CASP3;IFNGR2;RAC3
Hippo signaling pathway	5/163	0.688643	0.162006	0.999996	0	0	0.861318	0.321299	TCF7L2;PATJ;DVL1;TEAD2;BBC3
Progesterone-mediated oocyte maturation	3/100	0.692224	0.159754	0.999996	0	0	0.842071	0.309753	MAD2L2;AKT1;ADCY6
SNARE interactions in vesicular transport	1933-01-01	0.695884	0.157463	0.999996	0	0	0.851308	0.308661	VTI1A
Melanogenesis	3/101	0.698657	0.155736	0.999996	0	0	0.833435	0.298865	TCF7L2;DVL1;ADCY6
Fc epsilon RI signaling pathway	1968-02-01	0.699123	0.155447	0.999996	0	0	0.825221	0.295371	AKT1;RAC3
Amoebiasis	3/102	0.704989	0.151818	0.999996	0	0	0.824973	0.288389	CASP3;FN1;TLR2
Propanoate metabolism	1934-01-01	0.706667	0.150785	0.999996	0	0	0.825468	0.286599	LDHA
Renin secretion	1969-02-01	0.706749	0.150735	0.999996	0	0	0.812862	0.282128	PRKG2;ADCY6
RIG-I-like receptor signaling pathway	1970-02-01	0.714214	0.146172	0.999996	0	0	0.800867	0.26955	CYLD;RIPK1
C-type lectin receptor signaling pathway	3/104	0.717345	0.144272	0.999996	0	0	0.808553	0.2686	CYLD;MDM2;AKT1
Toll-like receptor signaling pathway	3/104	0.717345	0.144272	0.999996	0	0	0.808553	0.2686	AKT1;RIPK1;TLR2
MAPK signaling pathway	9/294	0.717473	0.144194	0.999996	0	0	0.858685	0.285101	ELK4;MAP4K2;DAXX;CACNB3;MAPK7;CASP3;AKT1;RAC3;MAPK8IP3
Tight junction	5/169	0.718542	0.143548	0.999996	0	0	0.829546	0.274191	ACTR3;PATJ;MYL6;TUBA4A;TJAP1
Autophagy	4/137	0.719151	0.14318	0.999996	0	0	0.818481	0.26984	ATG16L2;RPS6KB1;AKT1;CFLAR
Estrogen signaling pathway	4/137	0.719151	0.14318	0.999996	0	0	0.818481	0.26984	SHC1;NCOA3;AKT1;ADCY6
Yersinia infection	4/137	0.719151	0.14318	0.999996	0	0	0.818481	0.26984	ACTR3;FN1;AKT1;RAC3
Starch and sucrose metabolism	1936-01-01	0.727102	0.138405	0.999996	0	0	0.778218	0.248009	GANC
Parathyroid hormone synthesis, secretion and action	3/106	0.729296	0.137096	0.999996	0	0	0.79277	0.250258	CDKN1A;ADCY6;PLD2
Influenza A	5/172	0.732704	0.135071	0.999996	0	0	0.814516	0.253325	CASP3;IFNGR2;AKT1;BAX;KPNA2
PPAR signaling pathway	1974-02-01	0.742492	0.129308	0.999996	0	0	0.756217	0.225158	PLIN4;PLIN2
Primary immunodeficiency	1938-01-01	0.746115	0.127194	0.999996	0	0	0.736076	0.215578	RFX5
Rap1 signaling pathway	6/210	0.75759	0.120566	0.999996	0	0	0.799732	0.222015	SIPA1L1;CTNND1;AKT1;RAC3;TLN1;ADCY6
Leishmaniasis	1977-02-01	0.762099	0.117989	0.999996	0	0	0.725855	0.197199	IFNGR2;TLR2
Glycine, serine and threonine metabolism	1940-01-01	0.763806	0.117017	0.999996	0	0	0.698256	0.188139	SRR
Antigen processing and presentation	1978-02-01	0.768341	0.114446	0.999996	0	0	0.716267	0.188752	RFX5;IFI30
Axon guidance	5/182	0.776147	0.110056	0.999996	0	0	0.768096	0.194645	PTCH1;PLXNB2;RAC3;PAK6;PLXNB1
Lipid and atherosclerosis	6/215	0.776904	0.109633	0.999996	0	0	0.780395	0.197002	CASP3;MIB2;AKT1;BAX;VLDLR;TLR2
Peroxisome	1982-02-01	0.791902	0.101329	0.999996	0	0	0.680312	0.158729	SLC25A17;DECR2
Growth hormone synthesis, secretion and action	3/119	0.797496	0.0982717	0.999996	0	0	0.703448	0.159176	SHC1;AKT1;ADCY6
AMPK signaling pathway	3/120	0.802093	0.0957755	0.999996	0	0	0.6974	0.153798	PFKFB2;RPS6KB1;AKT1
ABC transporters	1945-01-01	0.802831	0.0953759	0.999996	0	0	0.618748	0.135884	ABCC5
Neutrophil extracellular trap formation	5/189	0.803193	0.0951802	0.999996	0	0	0.738605	0.161873	CLCN5;HDAC3;HDAC10;AKT1;TLR2
Type II diabetes mellitus	1946-01-01	0.809826	0.0916081	0.999996	0	0	0.604966	0.127609	PKM
Insulin secretion	1986-02-01	0.813322	0.0897373	0.999996	0	0	0.647781	0.13385	KCNN1;ADCY6
Carbohydrate digestion and absorption	1947-01-01	0.816574	0.0880045	0.999996	0	0	0.591784	0.119918	AKT1
Other types of O-glycan biosynthesis	1947-01-01	0.816574	0.0880045	0.999996	0	0	0.591784	0.119918	B4GALT2
Kaposi sarcoma-associated herpesvirus infection	5/193	0.817449	0.0875391	0.999996	0	0	0.722738	0.14568	TCF7L2;CDKN1A;CASP3;AKT1;BAX
Valine, leucine and isoleucine degradation	1948-01-01	0.823082	0.0845566	0.999996	0	0	0.579163	0.112762	HIBADH
GABAergic synapse	1989-02-01	0.828073	0.0819314	0.999996	0	0	0.625346	0.117974	SLC38A2;ADCY6
Ether lipid metabolism	1949-01-01	0.82936	0.0812567	0.999996	0	0	0.567067	0.106099	PLD2
Osteoclast differentiation	3/127	0.831871	0.079944	0.999996	0	0	0.65779	0.121085	CYLD;IFNGR2;AKT1
Hypertrophic cardiomyopathy	1990-02-01	0.832752	0.0794845	0.999996	0	0	0.618208	0.113144	CACNB3;EMD
Arginine and proline metabolism	1950-01-01	0.835416	0.0780973	0.999996	0	0	0.555466	0.099887	SMOX
Cholesterol metabolism	1950-01-01	0.835416	0.0780973	0.999996	0	0	0.555466	0.099887	TSPO
Relaxin signaling pathway	3/129	0.83964	0.0759067	0.999996	0	0	0.647281	0.113133	SHC1;AKT1;ADCY6
Ovarian steroidogenesis	1951-01-01	0.841257	0.0750715	0.999996	0	0	0.544328	0.0940918	ADCY6
Salivary secretion	1993-02-01	0.846106	0.0725753	0.999996	0	0	0.597734	0.0998877	PRKG2;ADCY6
IL-17 signaling pathway	1994-02-01	0.850337	0.0704087	0.999996	0	0	0.591206	0.0958475	MAPK7;CASP3
TGF-beta signaling pathway	1994-02-01	0.850337	0.0704087	0.999996	0	0	0.591206	0.0958475	RPS6KB1;THSD4
Circadian entrainment	1997-02-01	0.862404	0.0642893	0.999996	0	0	0.572447	0.0847402	PRKG2;ADCY6
Apelin signaling pathway	3/137	0.867687	0.0616368	0.999996	0	0	0.608384	0.0863443	RPS6KB1;AKT1;ADCY6
Hematopoietic cell lineage	1999-02-01	0.869946	0.0605076	0.999996	0	0	0.560585	0.078103	CD44;EPOR
Pancreatic secretion	2/102	0.880549	0.0552464	0.999996	0	0	0.543683	0.0691616	ADCY6;TPCN2
Protein digestion and absorption	2/103	0.883902	0.0535958	0.999996	0	0	0.538272	0.0664275	COL16A1;SLC38A2
cAMP signaling pathway	5/216	0.884007	0.0535444	0.999996	0	0	0.643181	0.0792982	PTCH1;AKT1;RAC3;ADCY6;PLD2
Long-term depression	1960-01-01	0.885336	0.0528919	0.999996	0	0	0.461079	0.056154	PRKG2
Endocytosis	6/252	0.885353	0.0528837	0.999996	0	0	0.661733	0.0805788	ACTR3;DNM3;MDM2;STAM;EPS15L1;PLD2
Signaling pathways regulating pluripotency of stem cells	3/143	0.885794	0.0526675	0.999996	0	0	0.582128	0.0705954	DVL1;AKT1;SMARCAD1
T cell receptor signaling pathway	2/104	0.887168	0.0519941	0.999996	0	0	0.532967	0.0638072	AKT1;PAK6
Regulation of actin cytoskeleton	5/218	0.888669	0.05126	0.999996	0	0	0.637075	0.0751943	ACTR3;FN1;RAC3;PAK6;IQGAP1
Drug metabolism	2/108	0.899397	0.0460483	0.999996	0	0	0.512748	0.0543668	MGST2;TK1
Insulin resistance	2/108	0.899397	0.0460483	0.999996	0	0	0.512748	0.0543668	RPS6KB1;AKT1
Adrenergic signaling in cardiomyocytes	3/150	0.904098	0.0437847	0.999996	0	0	0.554205	0.0558738	CACNB3;AKT1;ADCY6
Cortisol synthesis and secretion	1965-01-01	0.904299	0.043688	0.999996	0	0	0.424947	0.0427477	ADCY6
Aminoacyl-tRNA biosynthesis	1966-01-01	0.907698	0.0420588	0.999996	0	0	0.418388	0.0405183	FARSA
Chemokine signaling pathway	4/192	0.912002	0.0400043	0.999996	0	0	0.577369	0.0531834	SHC1;AKT1;RAC3;ADCY6
Cholinergic synapse	2/113	0.912948	0.0395541	0.999996	0	0	0.489524	0.0445842	AKT1;ADCY6
Retinol metabolism	1968-01-01	0.914138	0.0389883	0.999996	0	0	0.405856	0.0364353	DGAT1
Ras signaling pathway	5/232	0.917002	0.0376295	0.999996	0	0	0.597346	0.0517571	SHC1;AKT1;RAC3;PAK6;PLD2
Adipocytokine signaling pathway	1969-01-01	0.917188	0.0375418	0.999996	0	0	0.399867	0.0345657	AKT1
Cellular senescence	3/156	0.917631	0.0373319	0.999996	0	0	0.532304	0.0457569	CDKN1A;MDM2;AKT1
Chemical carcinogenesis	5/239	0.928629	0.0321577	0.999996	0	0	0.579263	0.0428921	RPS6KB1;AKT1;MGST2;KPNA2;ADCY6
Thyroid hormone synthesis	1975-01-01	0.933344	0.0299582	0.999996	0	0	0.367331	0.0253389	ADCY6
Gastric acid secretion	1976-01-01	0.935713	0.0288575	0.999996	0	0	0.362414	0.0240813	ADCY6
Metabolism of xenobiotics by cytochrome P450	1976-01-01	0.935713	0.0288575	0.999996	0	0	0.362414	0.0240813	MGST2
Pertussis	1976-01-01	0.935713	0.0288575	0.999996	0	0	0.362414	0.0240813	CASP3
PI3K-Akt signaling pathway	8/354	0.936354	0.0285597	0.999996	0	0	0.625797	0.0411532	CDKN1A;RPS6KB1;FN1;MDM2;AKT1;EPOR;TLR2;THBS3
cGMP-PKG signaling pathway	3/167	0.938008	0.0277936	0.999996	0	0	0.496316	0.0317627	AKT1;PRKG2;ADCY6
Oocyte meiosis	2/129	0.945667	0.0242619	0.999996	0	0	0.427494	0.023882	MAD2L2;ADCY6
Vascular smooth muscle contraction	2/133	0.951794	0.0214572	0.999996	0	0	0.414355	0.020472	MYL6;ADCY6
Taste transduction	1986-01-01	0.955233	0.0198908	0.999996	0	0	0.319611	0.0146382	ADCY6
Bile secretion	1990-01-01	0.961268	0.0171556	0.999996	0	0	0.305183	0.0120554	ADCY6
Alcoholism	3/186	0.962601	0.0165539	0.999996	0	0	0.444344	0.0169369	HDAC3;HDAC10;SHC1
Morphine addiction	1991-01-01	0.962645	0.0165338	0.999996	0	0	0.301776	0.0114888	ADCY6
Th1 and Th2 cell differentiation	1992-01-01	0.963973	0.015935	0.999996	0	0	0.298444	0.0109504	IFNGR2
Aldosterone synthesis and secretion	1998-01-01	0.971009	0.0127766	0.999996	0	0	0.279896	0.00823435	ADCY6
Inflammatory mediator regulation of TRP channels	1998-01-01	0.971009	0.0127766	0.999996	0	0	0.279896	0.00823435	ADCY6
Th17 cell differentiation	1/107	0.979075	0.009184	0.999996	0	0	0.256011	0.00541385	IFNGR2
Serotonergic synapse	1/113	0.983164	0.00737393	0.999996	0	0	0.242221	0.00411269	CASP3
Leukocyte transendothelial migration	1/114	0.983764	0.00710928	0.999996	0	0	0.240065	0.00392979	CTNND1
NOD-like receptor signaling pathway	2/181	0.989018	0.00479574	0.999996	0	0	0.302483	0.0033402	TRIP6;RIPK1
Dopaminergic synapse	1/132	0.991546	0.00368692	0.999996	0	0	0.206884	0.00175633	AKT1
Calcium signaling pathway	3/240	0.991783	0.0035835	0.999996	0	0	0.342131	0.00282303	GDNF;PHKB;TPCN2
Herpes simplex virus 1 infection	9/498	0.992639	0.00320886	0.999996	0	0	0.495089	0.00365806	DAXX;ZFP57;IFNGR2;CASP3;SRSF2;AKT1;BAX;ZFP37;TLR2
Cytokine-cytokine receptor interaction	2/295	0.99973	0.000117421	0.999996	0	0	0.183691	4.96648e-05	IFNGR2;EPOR
Neuroactive ligand-receptor interaction	2/341	0.99994	2.61628e-05	0.999996	0	0	0.158381	9.54121e-06	GRIK5;TSPO
Olfactory transduction	1/440	0.999996	1.72469e-06	0.999996	0	0	0.060743	2.41225e-07	PRKG2

## Sheet: MXE
Term	Overlap	P-value		Adjusted P-value	Old P-value	Old Adjusted P-value	Odds Ratio	Combined Score	Genes
Renal cell carcinoma	1969-07-01	0.000903495	3.04407	0.211418	0	0	4.96672	34.8129	EGLN1;CUL2;ARAF;RAPGEF1;ARNT;PAK6;ELOC
Ribosome	10/158	0.00312754	2.5048	0.28591	0	0	2.97942	17.1838	RPL4;RPS16;RPL18A;RPS19;RPL36AL;RPS5;RPL22;RPL35A;RPS2;MRPS18C
Citrate cycle (TCA cycle)	2023-04-30	0.00435987	2.36053	0.28591	0	0	6.73474	36.6054	IDH1;IDH2;ACO1;PCK2
Central carbon metabolism in cancer	1970-06-01	0.00488736	2.31093	0.28591	0	0	4.11444	21.8934	PKM;GLS2;IDH1;IDH2;SIRT6;PDK1
Various types of N-glycan biosynthesis	1939-04-01	0.0111695	1.95197	0.454001	0	0	5.00064	22.4757	RPN2;ALG14;MGAT1;ST3GAL3
HIF-1 signaling pathway	7/109	0.0116411	1.93401	0.454001	0	0	3.01279	13.4166	EGLN1;TFRC;CUL2;ARNT;PLCG1;ELOC;PDK1
Biosynthesis of unsaturated fatty acids	2023-03-27	0.0221778	1.65408	0.573306	0	0	5.46029	20.7964	ELOVL5;TECR;HACD4
Fatty acid elongation	2023-03-27	0.0221778	1.65408	0.573306	0	0	5.46029	20.7964	ELOVL5;TECR;HACD4
Phosphatidylinositol signaling system	1997-06-01	0.0223026	1.65164	0.573306	0	0	2.88966	10.9895	DGKD;INPP5A;PIP4K2A;CALML4;PLCG1;CALM2
Glioma	1975-05-01	0.0269293	1.56978	0.573306	0	0	3.12681	11.302	ARAF;CALML4;PLCG1;CALM2;DDB2
Vascular smooth muscle contraction	7/133	0.0309448	1.50941	0.573306	0	0	2.43592	8.46615	ARHGEF11;ARAF;MYH9;CALML4;CACNA1C;CALM2;RHOA
Circadian rhythm	2023-03-31	0.031917	1.49598	0.573306	0	0	4.67929	16.1184	CREB1;CLOCK;ARNTL
Glucagon signaling pathway	6/107	0.0339338	1.46937	0.573306	0	0	2.60222	8.80421	CRTC2;CREB1;PKM;CALML4;CALM2;PCK2
Peroxisome	1982-05-01	0.0375536	1.42535	0.573306	0	0	2.84153	9.32586	IDH1;IDH2;ACSL6;FAR1;HMGCLL1
Coronavirus disease	10/232	0.0377732	1.42282	0.573306	0	0	1.97871	6.48255	RPL4;RPS16;RPL18A;RPS19;RPL36AL;RPS5;RPL22;RPL35A;PLCG1;RPS2
Ubiquitin mediated proteolysis	7/140	0.0392004	1.40671	0.573306	0	0	2.30688	7.47214	PPIL2;CUL2;UBE2N;UBE3A;UBA1;ELOC;DDB2
AMPK signaling pathway	6/120	0.0540805	1.26696	0.731169	0	0	2.30394	6.72123	RAB2A;CRTC2;CREB1;AKT1S1;ELAVL1;PCK2
Long-term potentiation	1967-04-01	0.0641146	1.19304	0.731169	0	0	2.77415	7.62082	ARAF;CALML4;CACNA1C;CALM2
Transcriptional misregulation in cancer	8/192	0.0692943	1.1593	0.731169	0	0	1.90498	5.08513	RXRB;TAF15;CCNT1;EYA1;JMJD1C;PLAT;PTK2;DDB2
Amphetamine addiction	1969-04-01	0.0698876	1.1556	0.731169	0	0	2.68851	7.15378	CREB1;CALML4;CACNA1C;CALM2
Renin secretion	1969-04-01	0.0698876	1.1556	0.731169	0	0	2.68851	7.15378	CREB1;CALML4;CACNA1C;CALM2
Glycerophospholipid metabolism	1998-05-01	0.0703361	1.15282	0.731169	0	0	2.35073	6.23994	DGKD;MBOAT1;MBOAT2;TAZ;SELENOI
One carbon pool by folate	2023-02-20	0.0735266	1.13356	0.731169	0	0	4.84425	12.644	MTHFR;GART
Dopaminergic synapse	6/132	0.0779729	1.10806	0.731169	0	0	2.08323	5.31513	CREB1;CALML4;CACNA1C;CLOCK;CALM2;ARNTL
Non-small cell lung cancer	1972-04-01	0.0790287	1.10222	0.731169	0	0	2.56951	6.52127	RXRB;ARAF;PLCG1;DDB2
Arginine biosynthesis	2023-02-22	0.0868356	1.0613	0.731169	0	0	4.35938	10.6532	GLS2;ASL
Other types of O-glycan biosynthesis	1947-03-01	0.088853	1.05133	0.731169	0	0	2.97529	7.2025	GXYLT2;COLGALT1;ST3GAL3
Insulin signaling pathway	6/137	0.0894327	1.0485	0.731169	0	0	2.0032	4.83626	INPP5A;ARAF;RAPGEF1;CALML4;CALM2;PCK2
Parathyroid hormone synthesis, secretion and action	5/106	0.0911686	1.04015	0.731169	0	0	2.16364	5.18202	ARHGEF11;RXRB;CREB1;ARAF;RHOA
Proximal tubule bicarbonate reclamation	2023-02-23	0.0937396	1.02808	0.731169	0	0	4.15157	9.82775	GLS2;PCK2
N-Glycan biosynthesis	1950-03-01	0.102371	0.989822	0.747316	0	0	2.78495	6.34732	RPN2;ALG14;MGAT1
RNA degradation	1979-04-01	0.102515	0.989214	0.747316	0	0	2.32885	5.30453	PAN3;CNOT2;LSM1;CNOT9
D-Glutamine and D-glutamate metabolism	2023-01-05	0.10756	0.968349	0.747316	0	0	10.8831	24.2661	GLS2
Glycosylphosphatidylinositol (GPI)-anchor biosynthesis	2023-02-26	0.115323	0.938086	0.747316	0	0	3.63207	7.84535	PIGQ;PIGP
Glycosaminoglycan biosynthesis	1953-03-01	0.116647	0.933127	0.747316	0	0	2.61745	5.62386	CHSY1;B4GALT7;ST3GAL3
Endocytosis	9/252	0.116835	0.932426	0.747316	0	0	1.62148	3.48131	DAB2;TFRC;EPS15L1;RAB11FIP3;EPS15;SNX5;RHOA;WASHC3;EPN2
Regulation of actin cytoskeleton	8/218	0.120073	0.920555	0.747316	0	0	1.66688	3.53322	ARAF;LPAR1;FN1;PIP4K2A;PAK6;MYH9;PTK2;RHOA
ErbB signaling pathway	1985-04-01	0.124886	0.903486	0.747316	0	0	2.15568	4.48457	ARAF;PAK6;PLCG1;PTK2
Phosphonate and phosphinate metabolism	2023-01-06	0.127645	0.893996	0.747316	0	0	8.70601	17.9214	SELENOI
Phototransduction	2023-02-28	0.130339	0.884926	0.747316	0	0	3.35234	6.83078	CALML4;CALM2
Neurotrophin signaling pathway	5/119	0.13094	0.882928	0.747316	0	0	1.91563	3.89451	RAPGEF1;CALML4;PLCG1;CALM2;RHOA
Pathways in cancer	16/531	0.146354	0.834594	0.815403	0	0	1.36262	2.61859	EGLN1;ARHGEF11;WNT10B;CUL2;ARAF;FN1;LPAR1;ARNT;CALML4;PTK2;RHOA;DDB2;RXRB;PLCG1;ELOC;CALM2
Small cell lung cancer	1992-04-01	0.153318	0.814406	0.824218	0	0	1.98349	3.71952	RXRB;FN1;PTK2;DDB2
Glycerolipid metabolism	1961-03-01	0.15793	0.801536	0.824218	0	0	2.2555	4.16276	DGKD;MBOAT1;MBOAT2
Focal adhesion	7/201	0.168674	0.772951	0.824218	0	0	1.57655	2.80592	FN1;RAPGEF1;TNC;FLNA;PAK6;PTK2;RHOA
Lysine degradation	1963-03-01	0.168876	0.772432	0.824218	0	0	2.18009	3.87749	KMT2B;KMT5B;COLGALT1
Viral carcinogenesis	7/203	0.174566	0.758041	0.824218	0	0	1.5603	2.72344	POLB;RANBP1;CREB1;PKM;HDAC10;UBE3A;RHOA
Circadian entrainment	1997-04-01	0.174978	0.757016	0.824218	0	0	1.87637	3.27069	CREB1;CALML4;CACNA1C;CALM2
Aldosterone synthesis and secretion	1998-04-01	0.179431	0.746103	0.824218	0	0	1.85631	3.18908	CREB1;CALML4;CACNA1C;CALM2
Proteoglycans in cancer	7/205	0.180544	0.743416	0.824218	0	0	1.54438	2.64364	WNT10B;ARAF;FN1;FLNA;PLCG1;PTK2;RHOA
Protein processing in endoplasmic reticulum	6/171	0.188767	0.724073	0.824218	0	0	1.58763	2.64697	MBTPS1;RPN2;SAR1A;SSR4;SEC31B;SEC31A
Melanogenesis	4/101	0.193011	0.714418	0.824218	0	0	1.79862	2.95875	WNT10B;CREB1;CALML4;CALM2
Rap1 signaling pathway	7/210	0.195859	0.708057	0.824218	0	0	1.50595	2.45525	SIPA1L1;LPAR1;RAPGEF1;CALML4;PLCG1;CALM2;RHOA
Alanine, aspartate and glutamate metabolism	1937-02-01	0.202157	0.694312	0.824218	0	0	2.48916	3.97945	GLS2;ASL
Thyroid cancer	1937-02-01	0.202157	0.694312	0.824218	0	0	2.48916	3.97945	RXRB;DDB2
Adipocytokine signaling pathway	1969-03-01	0.202912	0.692692	0.824218	0	0	1.98129	3.16012	RXRB;ACSL6;PCK2
Synthesis and degradation of ketone bodies	2023-01-10	0.203574	0.691278	0.824218	0	0	4.83568	7.69708	HMGCLL1
Fluid shear stress and atherosclerosis	5/139	0.204293	0.689746	0.824218	0	0	1.62804	2.58565	PLAT;CALML4;CALM2;PTK2;RHOA
Taurine and hypotaurine metabolism	2023-01-11	0.221503	0.654621	0.86386	0	0	4.35189	6.5597	CSAD
Ubiquinone and other terpenoid-quinone biosynthesis	2023-01-11	0.221503	0.654621	0.86386	0	0	4.35189	6.5597	COQ2
Inositol phosphate metabolism	1973-03-01	0.226415	0.645094	0.868543	0	0	1.86769	2.77424	INPP5A;PIP4K2A;PLCG1
PPAR signaling pathway	1974-03-01	0.232372	0.633816	0.874264	0	0	1.84129	2.68721	RXRB;ACSL6;PCK2
Ferroptosis	1941-02-01	0.235379	0.628232	0.874264	0	0	2.2334	3.23075	TFRC;ACSL6
Alcoholism	6/186	0.242239	0.615756	0.874541	0	0	1.4542	2.06181	CREB1;HDAC10;PKIA;ARAF;CALML4;CALM2
Pertussis	1976-03-01	0.244368	0.611956	0.874541	0	0	1.79066	2.52318	CALML4;CALM2;RHOA
Adrenergic signaling in cardiomyocytes	5/150	0.249394	0.603114	0.874541	0	0	1.50368	2.08819	CREB1;TPM1;CALML4;CACNA1C;CALM2
Bacterial invasion of epithelial cells	1977-03-01	0.250403	0.601361	0.874541	0	0	1.76637	2.44586	FN1;RHOA;PTK2
Thermogenesis	7/232	0.268555	0.570966	0.898799	0	0	1.35716	1.78426	NDUFA13;CREB1;NDUFS6;AKT1S1;ACSL6;NDUFAF2;SIRT6
Basal transcription factors	1945-02-01	0.268871	0.570455	0.898799	0	0	2.02523	2.66018	TAF15;TAF4
Glycosphingolipid biosynthesis	1945-02-01	0.268871	0.570455	0.898799	0	0	2.02523	2.66018	ST3GAL4;ST3GAL3
Type II diabetes mellitus	1946-02-01	0.277251	0.557127	0.909678	0	0	1.9791	2.53885	PKM;CACNA1C
Growth hormone synthesis, secretion and action	4/119	0.279901	0.552996	0.909678	0	0	1.5157	1.92996	CREB1;CACNA1C;PLCG1;PTK2
Pyruvate metabolism	1947-02-01	0.285624	0.544205	0.915562	0	0	1.93502	2.42473	PKM;PCK2
Colorectal cancer	1986-03-01	0.30547	0.515031	0.948684	0	0	1.57411	1.86674	ARAF;RHOA;DDB2
Vibrio cholerae infection	1950-02-01	0.310668	0.507703	0.948684	0	0	1.8138	2.12039	KDELR3;PLCG1
cGMP-PKG signaling pathway	5/167	0.323139	0.490611	0.948684	0	0	1.34471	1.51908	CREB1;CALML4;CACNA1C;CALM2;RHOA
GABAergic synapse	1989-03-01	0.323983	0.489478	0.948684	0	0	1.51896	1.71197	GLS2;SLC6A12;CACNA1C
Parkinson disease	7/249	0.328985	0.482824	0.948684	0	0	1.26071	1.40159	NDUFA13;NDUFS6;UBA1;CALML4;PLCG1;KLC1;CALM2
Fatty acid biosynthesis	2023-01-18	0.336218	0.473379	0.948684	0	0	2.55902	2.78932	ACSL6
Human immunodeficiency virus 1 infection	6/212	0.343047	0.464647	0.948684	0	0	1.26896	1.35764	PAK6;CALML4;PLCG1;ELOC;CALM2;PTK2
GnRH signaling pathway	1993-03-01	0.348661	0.457596	0.948684	0	0	1.45116	1.52902	CALML4;CACNA1C;CALM2
Lipid and atherosclerosis	6/215	0.355038	0.449725	0.948684	0	0	1.25055	1.29498	RXRB;CALML4;PLCG1;CALM2;PTK2;RHOA
Pyrimidine metabolism	1956-02-01	0.360112	0.443562	0.948684	0	0	1.61177	1.64617	NME2;UCKL1
Steroid biosynthesis	2023-01-20	0.365779	0.436781	0.948684	0	0	2.28942	2.30252	FDFT1
Glutathione metabolism	1957-02-01	0.368234	0.433876	0.948684	0	0	1.58239	1.58086	IDH1;IDH2
Yersinia infection	4/137	0.371491	0.430051	0.948684	0	0	1.30935	1.29656	FN1;PLCG1;PTK2;RHOA
Prostate cancer	1997-03-01	0.373245	0.428006	0.948684	0	0	1.38912	1.36901	CREB1;ARAF;PLAT
Endometrial cancer	1958-02-01	0.376316	0.424447	0.948684	0	0	1.55405	1.51881	ARAF;DDB2
Choline metabolism in cancer	1998-03-01	0.379365	0.420943	0.948684	0	0	1.37443	1.33217	DGKD;SLC44A2;PLCG1
Inflammatory mediator regulation of TRP channels	1998-03-01	0.379365	0.420943	0.948684	0	0	1.37443	1.33217	CALML4;PLCG1;CALM2
Pathways of neurodegeneration	12/475	0.382559	0.417301	0.948684	0	0	1.12944	1.08525	WNT10B;ATXN2;NDUFA13;ATXN1;NDUFS6;ARAF;UBA1;PLCG1;CALML4;CACNA1C;KLC1;CALM2
Notch signaling pathway	1959-02-01	0.384355	0.415268	0.948684	0	0	1.52671	1.45982	TLE1;ATXN1
VEGF signaling pathway	1959-02-01	0.384355	0.415268	0.948684	0	0	1.52671	1.45982	PLCG1;PTK2
Mineral absorption	1960-02-01	0.392348	0.406328	0.948684	0	0	1.50031	1.4037	CLCN2;TRPM6
Terpenoid backbone biosynthesis	2023-01-22	0.394026	0.404475	0.948684	0	0	2.07116	1.92895	PDSS1
Human cytomegalovirus infection	6/225	0.39516	0.403227	0.948684	0	0	1.19283	1.1075	ARHGEF11;CREB1;CALML4;CALM2;PTK2;RHOA
Spinocerebellar ataxia	4/143	0.402074	0.395694	0.948684	0	0	1.25244	1.14113	ATXN2;ATXN1;PUM1;PUM2
Mannose type O-glycan biosynthesis	2023-01-23	0.407676	0.389685	0.948684	0	0	1.97692	1.77386	ST3GAL3
Renin-angiotensin system	2023-01-23	0.407676	0.389685	0.948684	0	0	1.97692	1.77386	NLN
C-type lectin receptor signaling pathway	3/104	0.415775	0.381141	0.948684	0	0	1.29238	1.1342	CALML4;CALM2;RHOA
T cell receptor signaling pathway	3/104	0.415775	0.381141	0.948684	0	0	1.29238	1.1342	PAK6;PLCG1;RHOA
Basal cell carcinoma	1963-02-01	0.416038	0.380867	0.948684	0	0	1.4263	1.25084	WNT10B;DDB2
Phospholipase D signaling pathway	4/148	0.427356	0.36921	0.948684	0	0	1.20864	1.02751	DGKD;LPAR1;PLCG1;RHOA
Cortisol synthesis and secretion	1965-02-01	0.431572	0.364947	0.948684	0	0	1.38088	1.16038	CREB1;CACNA1C
Gastric cancer	4/149	0.432381	0.364133	0.948684	0	0	1.20025	1.00634	RXRB;WNT10B;ARAF;DDB2
Insulin resistance	3/108	0.439667	0.356876	0.948684	0	0	1.24289	1.02133	CRTC2;CREB1;PCK2
Glycolysis / Gluconeogenesis	1967-02-01	0.446882	0.349807	0.948684	0	0	1.33826	1.07791	PKM;PCK2
Alzheimer disease	9/369	0.450436	0.346367	0.948684	0	0	1.08787	0.867618	WNT10B;NDUFA13;NDUFS6;ARAF;CALML4;CACNA1C;KLC1;CALM2;RTN4
Pathogenic Escherichia coli infection	5/197	0.456367	0.340686	0.948684	0	0	1.13284	0.888666	ARHGEF11;LPAR1;TAB3;MYH9;RHOA
Oxytocin signaling pathway	4/154	0.457315	0.339784	0.948684	0	0	1.15994	0.907517	CALML4;CACNA1C;CALM2;RHOA
Cushing syndrome	4/155	0.462259	0.335114	0.948684	0	0	1.1522	0.889071	WNT10B;CREB1;ARNT;CACNA1C
Epithelial cell signaling in Helicobacter pylori infection	1970-02-01	0.469407	0.32845	0.948684	0	0	1.27902	0.967302	CSK;PLCG1
Butanoate metabolism	2023-01-28	0.471456	0.326559	0.948684	0	0	1.61041	1.21091	HMGCLL1
Leukocyte transendothelial migration	3/114	0.474771	0.323516	0.948684	0	0	1.17534	0.875541	PLCG1;PTK2;RHOA
Shigellosis	6/246	0.478656	0.319977	0.948684	0	0	1.08727	0.801075	AKT1S1;UBE2N;TAB3;PLCG1;PTK2;RHOA
Melanoma	1972-02-01	0.484116	0.315051	0.948684	0	0	1.24235	0.901237	ARAF;DDB2
Glyoxylate and dicarboxylate metabolism	2023-01-30	0.495006	0.305389	0.948684	0	0	1.49919	1.05421	ACO1
RNA polymerase	2023-01-31	0.506386	0.295519	0.948684	0	0	1.44915	0.986081	POLR1D
Chronic myeloid leukemia	1976-02-01	0.512762	0.290085	0.948684	0	0	1.17495	0.784802	ARAF;DDB2
Gastric acid secretion	1976-02-01	0.512762	0.290085	0.948684	0	0	1.17495	0.784802	CALML4;CALM2
Pancreatic cancer	1976-02-01	0.512762	0.290085	0.948684	0	0	1.17495	0.784802	ARAF;DDB2
Wnt signaling pathway	4/166	0.515484	0.287785	0.948684	0	0	1.07335	0.711258	WNT10B;TLE1;ZNRF3;RHOA
Hepatocellular carcinoma	4/168	0.524902	0.279922	0.948684	0	0	1.06016	0.683316	WNT10B;ARAF;PLCG1;DDB2
Synaptic vesicle cycle	1978-02-01	0.526687	0.278448	0.948684	0	0	1.14391	0.73342	NAPA;SLC6A12
Base excision repair	1933-01-01	0.528383	0.277051	0.948684	0	0	1.35844	0.866593	POLB
SNARE interactions in vesicular transport	1933-01-01	0.528383	0.277051	0.948684	0	0	1.35844	0.866593	VTI1A
Cell cycle	3/124	0.530885	0.274999	0.948684	0	0	1.07765	0.68238	STAG2;TFDP1;MCM6
cAMP signaling pathway	5/216	0.5372	0.269864	0.948684	0	0	1.02982	0.639915	CREB1;CALML4;CACNA1C;CALM2;RHOA
Nicotinate and nicotinamide metabolism	1935-01-01	0.549401	0.26011	0.948684	0	0	1.2784	0.765665	SIRT6
Purine metabolism	3/129	0.557656	0.253634	0.948684	0	0	1.03462	0.604234	PKM;NME2;GART
DNA replication	1936-01-01	0.559558	0.252155	0.948684	0	0	1.24181	0.721004	MCM6
Tuberculosis	4/180	0.579449	0.236985	0.948684	0	0	0.98726	0.538727	CREB1;CALML4;CALM2;RHOA
Insulin secretion	1986-02-01	0.579643	0.236839	0.948684	0	0	1.03455	0.564182	CREB1;CACNA1C
Taste transduction	1986-02-01	0.579643	0.236839	0.948684	0	0	1.03455	0.564182	CACNA1C;SCN2A
Cardiac muscle contraction	1987-02-01	0.585949	0.23214	0.948684	0	0	1.02232	0.546454	TPM1;CACNA1C
Axon guidance	4/182	0.588187	0.230484	0.948684	0	0	0.976067	0.518008	PAK6;PLCG1;PTK2;RHOA
ECM-receptor interaction	1988-02-01	0.592185	0.227543	0.948684	0	0	1.01038	0.529376	TNC;FN1
Glycine, serine and threonine metabolism	1940-01-01	0.597949	0.223336	0.948684	0	0	1.11421	0.572984	PSPH
Apelin signaling pathway	3/137	0.598522	0.22292	0.948684	0	0	0.972453	0.499152	PLAT;CALML4;CALM2
Estrogen signaling pathway	3/137	0.598522	0.22292	0.948684	0	0	0.972453	0.499152	CREB1;CALML4;CALM2
Ras signaling pathway	5/232	0.600731	0.22132	0.948684	0	0	0.956442	0.48741	PAK6;CALML4;PLCG1;CALM2;RHOA
Hypertrophic cardiomyopathy	1990-02-01	0.604446	0.218643	0.948684	0	0	0.987317	0.497058	TPM1;CACNA1C
Bladder cancer	1941-01-01	0.607013	0.216802	0.948684	0	0	1.0863	0.542287	ARAF
Human papillomavirus infection	7/331	0.618569	0.208612	0.948684	0	0	0.937645	0.450394	WNT10B;CREB1;PKM;FN1;TNC;UBE3A;PTK2
Salivary secretion	1993-02-01	0.622311	0.205993	0.948684	0	0	0.954621	0.452792	CALML4;CALM2
Fatty acid degradation	1943-01-01	0.624535	0.204443	0.948684	0	0	1.03447	0.486974	ACSL6
IL-17 signaling pathway	1994-02-01	0.628126	0.201953	0.948684	0	0	0.944196	0.439065	TAB3;ELAVL1
TGF-beta signaling pathway	1994-02-01	0.628126	0.201953	0.948684	0	0	0.944196	0.439065	TFDP1;RHOA
Vasopressin-regulated water reabsorption	1944-01-01	0.633001	0.198596	0.948684	0	0	1.01036	0.462021	CREB1
Kaposi sarcoma-associated herpesvirus infection	4/193	0.634298	0.197707	0.948684	0	0	0.918737	0.418243	CREB1;CALML4;PLCG1;CALM2
Dilated cardiomyopathy	1996-02-01	0.639547	0.194128	0.948684	0	0	0.924012	0.413029	TPM1;CACNA1C
ABC transporters	1945-01-01	0.641276	0.192955	0.948684	0	0	0.987346	0.438672	ABCG2
Breast cancer	3/147	0.646015	0.189758	0.948684	0	0	0.904456	0.395187	WNT10B;ARAF;DDB2
Retrograde endocannabinoid signaling	3/148	0.650538	0.186727	0.948684	0	0	0.898172	0.386173	NDUFA13;NDUFS6;CACNA1C
mRNA surveillance pathway	1998-02-01	0.65069	0.186626	0.948684	0	0	0.904669	0.388755	CSTF3;UPF3A
Nucleotide excision repair	1947-01-01	0.657273	0.182254	0.948684	0	0	0.944321	0.396289	DDB2
AGE-RAGE signaling pathway in diabetic complications	2/100	0.661559	0.179432	0.948684	0	0	0.886115	0.366104	FN1;PLCG1
Amino sugar and nucleotide sugar metabolism	1948-01-01	0.665003	0.177177	0.948684	0	0	0.924181	0.377033	UXS1
Valine, leucine and isoleucine degradation	1948-01-01	0.665003	0.177177	0.948684	0	0	0.924181	0.377033	HMGCLL1
Amoebiasis	2/102	0.672154	0.172531	0.948684	0	0	0.868304	0.344949	FN1;PTK2
Longevity regulating pathway	2/102	0.672154	0.172531	0.948684	0	0	0.868304	0.344949	CREB1;AKT1S1
Cocaine addiction	1949-01-01	0.672558	0.17227	0.948684	0	0	0.904881	0.358936	CREB1
Ether lipid metabolism	1949-01-01	0.672558	0.17227	0.948684	0	0	0.904881	0.358936	SELENOI
Sphingolipid metabolism	1949-01-01	0.672558	0.17227	0.948684	0	0	0.904881	0.358936	ACER3
mTOR signaling pathway	3/154	0.676814	0.16953	0.948684	0	0	0.862216	0.336573	WNT10B;AKT1S1;RHOA
Arginine and proline metabolism	1950-01-01	0.679944	0.167527	0.948684	0	0	0.886369	0.341912	P4HA1
NF-kappa B signaling pathway	2/104	0.682479	0.165911	0.948684	0	0	0.85119	0.325175	TAB3;PLCG1
PI3K-Akt signaling pathway	7/354	0.687245	0.162888	0.948684	0	0	0.874448	0.327974	CRTC2;CREB1;LPAR1;FN1;TNC;PTK2;PCK2
Th17 cell differentiation	2/107	0.697466	0.156477	0.948684	0	0	0.826743	0.297876	RXRB;PLCG1
Drug metabolism	2/108	0.702331	0.153458	0.948684	0	0	0.818902	0.28936	NME2;UCKL1
Hepatitis B	3/162	0.709539	0.149024	0.948684	0	0	0.818496	0.280858	CREB1;ARAF;DDB2
TNF signaling pathway	2/112	0.721141	0.14198	0.948684	0	0	0.788961	0.257928	CREB1;TAB3
Cholinergic synapse	2/113	0.725684	0.139253	0.948684	0	0	0.781813	0.250681	CREB1;CACNA1C
Serotonergic synapse	2/113	0.725684	0.139253	0.948684	0	0	0.781813	0.250681	ARAF;CACNA1C
Legionellosis	1957-01-01	0.727191	0.138351	0.948684	0	0	0.775294	0.246982	SAR1A
Human T-cell leukemia virus 1 infection	4/219	0.729339	0.13707	0.948684	0	0	0.806549	0.25456	POLB;RANBP1;CRTC2;CREB1
Glutamatergic synapse	2/114	0.730164	0.136579	0.948684	0	0	0.774793	0.243661	GLS2;CACNA1C
Prion disease	5/273	0.73854	0.131626	0.948684	0	0	0.808402	0.245011	NDUFA13;CREB1;NDUFS6;CACNA1C;KLC1
Long-term depression	1960-01-01	0.745246	0.1277	0.948684	0	0	0.735759	0.216343	ARAF
Thyroid hormone signaling pathway	2/121	0.759817	0.119291	0.948684	0	0	0.728954	0.200227	RXRB;PLCG1
Cytosolic DNA-sensing pathway	1963-01-01	0.762108	0.117984	0.948684	0	0	0.70005	0.190181	POLR1D
GnRH secretion	1964-01-01	0.767477	0.114934	0.948684	0	0	0.688903	0.182316	CACNA1C
NOD-like receptor signaling pathway	3/181	0.776973	0.109594	0.948684	0	0	0.730412	0.18432	ERBIN;TAB3;RHOA
Aminoacyl-tRNA biosynthesis	1966-01-01	0.777856	0.109101	0.948684	0	0	0.667637	0.16772	TARS2
Acute myeloid leukemia	1967-01-01	0.782871	0.10631	0.948684	0	0	0.657488	0.160945	ARAF
Lysosome	2/128	0.786611	0.10424	0.948684	0	0	0.688209	0.165185	LAPTM4A;AP3D1
Fc epsilon RI signaling pathway	1968-01-01	0.787773	0.103599	0.948684	0	0	0.647642	0.154492	PLCG1
Chemical carcinogenesis	4/239	0.788959	0.102945	0.948684	0	0	0.737143	0.174733	RXRB;CREB1;ARNT;CACNA1C
Oocyte meiosis	2/129	0.790216	0.102254	0.948684	0	0	0.682754	0.160754	CALML4;CALM2
Calcium signaling pathway	4/240	0.791644	0.10147	0.948684	0	0	0.733982	0.171491	CALML4;PLCG1;CACNA1C;CALM2
RNA transport	3/186	0.792425	0.101042	0.948684	0	0	0.710272	0.16525	EIF4A2;NUP85;UPF3A
MAPK signaling pathway	5/294	0.794137	0.100105	0.948684	0	0	0.748843	0.172608	ARAF;MAP3K20;FLNA;CACNA1C;MAPK8IP3
FoxO signaling pathway	2/131	0.797267	0.0983964	0.948684	0	0	0.6721	0.152275	ARAF;PCK2
Natural killer cell mediated cytotoxicity	2/131	0.797267	0.0983964	0.948684	0	0	0.6721	0.152275	ARAF;PLCG1
Adherens junction	1971-01-01	0.801825	0.0959201	0.948684	0	0	0.61979	0.136889	RHOA
Oxidative phosphorylation	2/133	0.804107	0.0946863	0.948684	0	0	0.661771	0.144281	NDUFA13;NDUFS6
Chemokine signaling pathway	3/192	0.809782	0.0916317	0.948684	0	0	0.687511	0.145058	PLCG1;PTK2;RHOA
p53 signaling pathway	1973-01-01	0.810674	0.0911536	0.948684	0	0	0.602512	0.126461	DDB2
Salmonella infection	4/249	0.814588	0.0890622	0.948684	0	0	0.70669	0.144923	FLNA;TAB3;KLC1;RHOA
Thyroid hormone synthesis	1975-01-01	0.819129	0.0866479	0.948684	0	0	0.586167	0.116949	CREB1
Huntington disease	5/306	0.821504	0.0853901	0.948684	0	0	0.718541	0.141278	NDUFA13;CREB1;NDUFS6;KLC1;TAF4
Arrhythmogenic right ventricular cardiomyopathy	1977-01-01	0.827206	0.0823861	0.948684	0	0	0.570683	0.108259	CACNA1C
MicroRNAs in cancer	5/310	0.82995	0.0809479	0.948684	0	0	0.70897	0.132145	GLS2;TPM1;TNC;PLCG1;RHOA
Antigen processing and presentation	1978-01-01	0.831109	0.0803419	0.948684	0	0	0.563243	0.104197	CREB1
Amyotrophic lateral sclerosis	6/364	0.831112	0.0803403	0.948684	0	0	0.724445	0.134015	SETX;NDUFA13;ATXN2;NUP85;NDUFS6;KLC1
Complement and coagulation cascades	1985-01-01	0.856074	0.0674887	0.966628	0	0	0.51612	0.0802044	PLAT
Gap junction	1988-01-01	0.865612	0.0626768	0.966628	0	0	0.498246	0.0719062	LPAR1
Non-alcoholic fatty liver disease	2/155	0.866802	0.06208	0.966628	0	0	0.565972	0.0809026	NDUFA13;NDUFS6
PD-L1 expression and PD-1 checkpoint pathway in cancer	1989-01-01	0.868649	0.0611557	0.966628	0	0	0.492559	0.0693603	PLCG1
Cellular senescence	2/156	0.86916	0.0609002	0.966628	0	0	0.562268	0.0788457	CALML4;CALM2
Bile secretion	1990-01-01	0.871618	0.059674	0.966628	0	0	0.487	0.066916	ABCG2
Th1 and Th2 cell differentiation	1992-01-01	0.877355	0.0568245	0.968402	0	0	0.476248	0.0623137	PLCG1
Fc gamma R-mediated phagocytosis	1997-01-01	0.890605	0.0503148	0.972681	0	0	0.451327	0.0522881	PLCG1
Hematopoietic cell lineage	1999-01-01	0.895496	0.0479364	0.972681	0	0	0.442071	0.0487947	TFRC
Tight junction	2/169	0.89651	0.0474451	0.972681	0	0	0.518151	0.0566061	MYH9;RHOA
Progesterone-mediated oocyte maturation	1/100	0.897859	0.0467919	0.972681	0	0	0.437583	0.0471462	ARAF
Pancreatic secretion	1/102	0.902426	0.0445883	0.973123	0	0	0.428874	0.0440318	RHOA
Ribosome biogenesis in eukaryotes	1/108	0.914941	0.0386069	0.982093	0	0	0.4047	0.0359761	NOP58
Neutrophil extracellular trap formation	2/189	0.928395	0.0322673	0.988551	0	0	0.462256	0.0343448	HDAC10;PLCG1
Sphingolipid signaling pathway	1/119	0.933872	0.0297124	0.988551	0	0	0.366766	0.0250925	RHOA
Platelet activation	1/124	0.941026	0.0263986	0.988551	0	0	0.351766	0.0213821	RHOA
Diabetic cardiomyopathy	2/203	0.944931	0.0245998	0.988551	0	0	0.429749	0.0243423	NDUFA13;NDUFS6
Osteoclast differentiation	1/127	0.944941	0.0245952	0.988551	0	0	0.343338	0.0194441	CREB1
Relaxin signaling pathway	1/129	0.947406	0.0234637	0.988551	0	0	0.337938	0.0182578	CREB1
Autophagy	1/137	0.956214	0.019445	0.988551	0	0	0.317929	0.0142348	AKT1S1
Signaling pathways regulating pluripotency of stem cells	1/143	0.961839	0.0168976	0.988551	0	0	0.304401	0.0118437	WNT10B
Cell adhesion molecules	1/148	0.965972	0.0150356	0.988551	0	0	0.293971	0.0101775	MPZL1
Spliceosome	1/150	0.967497	0.0143505	0.988551	0	0	0.289996	0.00958238	PRPF40A
Phagosome	1/152	0.968954	0.013697	0.988551	0	0	0.286125	0.00902394	TFRC
Hepatitis C	1/157	0.972317	0.012192	0.988551	0	0	0.276883	0.00777299	ARAF
Hippo signaling pathway	1/163	0.975877	0.010605	0.988551	0	0	0.266546	0.00650874	WNT10B
Epstein-Barr virus infection	1/202	0.990149	0.00429936	0.998685	0	0	0.214396	0.00212244	DDB2
Olfactory transduction	2/440	0.999542	0.000198968	0.999598	0	0	0.194798	8.92448e-05	CALML4;CALM2
Neuroactive ligand-receptor interaction	1/341	0.999598	0.000174428	0.999598	0	0	0.125835	5.05398e-05	LPAR1

## Sheet: RI
Term	Overlap	P-value		Adjusted P-value	Old P-value	Old Adjusted P-value	Odds Ratio	Combined Score	Genes
Fanconi anemia pathway	13/54	0.000400107	3.39782	0.0470418	0	0	3.49277	27.3267	MUS81;TOP3B;FANCI;CENPX;RMI1;SLX1B;REV1;FANCA;FANCE;EME2;ERCC1;POLH;TELO2
Ribosome biogenesis in eukaryotes	20/108	0.000579589	3.23688	0.0470418	0	0	2.5077	18.6904	NOP56;NOP58;NXT1;NVL;NAT10;PWP2;GNL2;UTP18;GTPBP4;RRP7A;NXF1;EMG1;TBL3;XPO1;XRN1;DKC1;BMS1;XRN2;RIOK1;MDN1
Lysine degradation	14/63	0.000583801	3.23374	0.0470418	0	0	3.14785	23.4387	KMT2E;KMT2D;KMT2A;SETDB1;KMT5C;PHYKPL;EHMT2;SUV39H1;SETD7;KMT2B;SMYD2;KMT5B;COLGALT1;EZH2
RNA degradation	16/79	0.000730422	3.13643	0.0470418	0	0	2.79932	20.2164	PARN;CNOT10;ENO2;ENO3;EDC4;PAN2;CNOT6;PFKL;PAN3;XRN1;XRN2;CNOT3;SKIV2L;EXOSC2;PFKP;DCP1B
Lysosome	22/128	0.000908556	3.04165	0.0470418	0	0	2.29056	16.0423	CTSA;ARSA;ABCA2;ATP6V0B;IDUA;GAA;M6PR;AP3D1;TCIRG1;NAGPA;MCOLN1;CLN5;AP4M1;CLN3;GGA3;AP1G2;NEU1;MAN2B1;TPP1;ACP2;CTSF;ATP6V0A1
Notch signaling pathway	13/59	0.00098689	3.00573	0.0470418	0	0	3.11227	21.5399	PSENEN;JAG2;NOTCH3;TLE2;JAG1;RFNG;LFNG;APH1A;KAT2B;KAT2A;ATXN1L;DVL1;DVL3
Base excision repair	1933-09-01	0.00119248	2.92355	0.0487213	0	0	4.12477	27.7668	MBD4;PARP3;PARP2;XRCC1;LIG3;HMGB1;NEIL1;POLE;MUTYH
Autophagy	21/137	0.00488437	2.31119	0.174616	0	0	1.99565	10.6203	MAP2K2;ATG9A;PRKCD;WDR41;TSC2;PIK3R2;EIF2AK4;HMGB1;WIPI2;STK11;ATG16L2;RPS6KB1;ATG16L1;RB1CC1;RPS6KB2;ATG2A;MLST8;ATG4B;ULK1;HRAS;ATG4D
FoxO signaling pathway	20/131	0.00619566	2.20791	0.196884	0	0	1.98558	10.0945	PLK3;MAP2K2;PRMT1;PLK2;SETD7;ARAF;PRKAG1;PIK3R2;BRAF;GADD45G;IKBKB;MAPK11;STK11;G6PC3;CDK2;HOMER3;ATM;SGK3;HRAS;PCK2
Human papillomavirus infection	41/331	0.00732202	2.13537	0.20941	0	0	1.56254	7.68279	NOTCH3;LAMA5;ITGA2B;UBR4;PIK3R2;UBE3A;CHD4;RFNG;TCIRG1;THBS1;THBS3;IKBKB;LFNG;DVL1;DVL3;HRAS;ATP6V0A1;ATP6V1G1;ATP6V0B;JAG1;MAP2K2;TBP;ITGA3;LAMB2;STAT2;FN1;PPP2R5B;TSC2;SCRIB;COL1A1;IRF3;APC;RPS6KB1;NFX1;CDK2;TADA3;RPS6KB2;ATM;ITGA5;LLGL1;LLGL2
Insulin signaling pathway	20/137	0.0101055	1.99544	0.262744	0	0	1.88313	8.65238	SREBF1;MAP2K2;PDE3B;ARAF;INPPL1;PRKAG1;TSC2;PIK3R2;BRAF;IKBKB;G6PC3;RPS6KB1;FASN;MKNK2;PHKG2;RPS6KB2;CALM2;HRAS;SH2B2;PCK2
RNA transport	25/186	0.0123646	1.90782	0.29469	0	0	1.71166	7.51916	CYFIP1;EIF4A1;NUP205;NXT1;NUP188;GEMIN2;CASC3;AAAS;NXF1;XPO1;TPR;NUP88;SMN1;EIF2B5;FUS;THOC2;THOC7;SRRM1;EIF3I;ACIN1;RNPS1;NUP54;NUP98;TARDBP;EIF4G1
mRNA surveillance pathway	15/98	0.0159655	1.79682	0.351241	0	0	1.98861	8.22751	CPSF4;CPSF7;CPSF6;NXT1;CPSF1;FUS;RNMT;PPP2R5B;CASC3;SRRM1;NXF1;FIP1L1;ACIN1;RNPS1;TARDBP
Neurotrophin signaling pathway	17/119	0.0204481	1.68935	0.417725	0	0	1.83424	7.13495	CAMK2B;MAP2K2;MAGED1;PRKCD;ARHGDIG;PIK3R2;BRAF;IKBKB;MAPK11;MAPK7;IRAK1;IRAK2;PLCG1;CALM2;HRAS;SH2B3;SH2B2
Spliceosome	20/150	0.0252852	1.59713	0.482104	0	0	1.69361	6.22832	DDX5;RBM25;SF3A2;DDX46;FUS;PRPF40B;THOC2;CHERP;U2AF1L4;XAB2;TRA2A;ACIN1;SNRPA1;SRSF5;SNRPC;SRSF6;HNRNPA1;SRSF7;SF3B1;BCAS2
Central carbon metabolism in cancer	1970-11-01	0.0301458	1.52077	0.501813	0	0	2.04928	7.17597	LDHA;PFKL;MAP2K2;SIRT6;PIK3R2;SLC1A5;HRAS;MET;FGFR3;PFKP;PDK1
Glucagon signaling pathway	15/107	0.032786	1.48431	0.501813	0	0	1.79318	6.12866	CAMK2B;PRMT1;PDE3B;PRKAG1;CPT1C;LDHA;PLCB3;PFKL;PPP4C;G6PC3;PHKG2;SIK1;CALM2;PFKP;PCK2
Non-small cell lung cancer	1972-11-01	0.0362036	1.44125	0.501813	0	0	1.98187	6.57703	MAP2K2;KIF5C;ARAF;PIK3R2;BRAF;PLCG1;HRAS;JAK3;MET;DDB2;GADD45G
Proteoglycans in cancer	25/205	0.0363771	1.43917	0.501813	0	0	1.52938	5.06808	CAMK2B;DDX5;ROCK2;ARAF;PIK3R2;THBS1;SLC9A1;PLAU;FLNA;PLCG1;HRAS;MAP2K2;PPP1R12A;FN1;BRAF;HSPG2;COL1A1;MAPK11;RPS6KB1;RPS6KB2;ARHGEF1;ITGA5;MET;PPP1R12C;CD44
Mannose type O-glycan biosynthesis	2023-05-23	0.0384519	1.41508	0.501813	0	0	3.04906	9.9349	B3GALNT2;B4GALT2;POMT2;POMT1;POMGNT1
Progesterone-mediated oocyte maturation	14/100	0.0386421	1.41294	0.501813	0	0	1.78991	5.82333	ANAPC13;PDE3B;ARAF;ADCY3;PIK3R2;BRAF;PKMYT1;CDC25A;ADCY6;CDC25B;MAD2L2;MAPK11;CDK2;ANAPC2
Various types of N-glycan biosynthesis	1939-07-01	0.0407971	1.38937	0.501813	0	0	2.40218	7.68492	B4GALT2;RPN2;MAN2A2;MGAT4B;ALG1;DDOST;B4GALNT4
Galactose metabolism	1931-06-01	0.0408073	1.38926	0.501813	0	0	2.63496	8.42896	B4GALT2;PFKL;GALT;G6PC3;GAA;PFKP
AMPK signaling pathway	16/120	0.0421102	1.37561	0.501813	0	0	1.69194	5.35915	PFKFB2;SREBF1;PRKAG1;PPP2R5B;TSC2;PIK3R2;CPT1C;STK11;PFKL;G6PC3;RPS6KB1;FASN;RPS6KB2;ULK1;PFKP;PCK2
Sphingolipid metabolism	1949-08-01	0.0490048	1.30976	0.560615	0	0	2.14294	6.46277	ARSA;CERS5;SMPD4;ASAH2;SPHK2;NEU1;GBA2;CERS1
Colorectal cancer	1986-12-01	0.0539705	1.26784	0.592369	0	0	1.78203	5.2023	MAP2K2;APC;RPS6KB1;MSH3;RPS6KB2;ARAF;PIK3R2;BRAF;HRAS;RALGDS;DDB2;GADD45G
Other glycan degradation	2023-04-18	0.0579162	1.2372	0.592369	0	0	3.13498	8.93081	NEU1;MAN2B1;MAN2C1;GBA2
Phosphatidylinositol signaling system	13/97	0.0604428	1.21866	0.592369	0	0	1.7008	4.77253	INPPL1;PIK3R2;SYNJ2;INPP5B;PLCB3;PIP4P1;DGKQ;INPP5E;PLCG1;PI4KB;IP6K1;CALM2;PI4K2A
ECM-receptor interaction	1988-12-01	0.0623391	1.20524	0.592369	0	0	1.73494	4.81475	COL1A1;LAMA5;ITGA3;LAMB2;ITGA2B;FN1;ITGA5;AGRN;HSPG2;THBS1;CD44;THBS3
Choline metabolism in cancer	13/98	0.0645983	1.18978	0.592369	0	0	1.68069	4.60437	MAP2K2;CHKB;CHKA;SLC44A2;TSC2;PIK3R2;PLD2;RPS6KB1;DGKQ;RPS6KB2;PLCG1;RALGDS;HRAS
Epithelial cell signaling in Helicobacter pylori infection	1970-10-01	0.0652708	1.18528	0.592369	0	0	1.83073	4.99644	IKBKB;MAPK11;ATP6V0B;ATP6V1G1;CSK;TCIRG1;PLCG1;MET;GIT1;ATP6V0A1
Insulin resistance	14/108	0.066279	1.17862	0.592369	0	0	1.63686	4.44225	MLXIP;SREBF1;SLC27A1;NR1H2;PRKCD;OGA;PRKAG1;PIK3R2;IKBKB;G6PC3;RPS6KB1;RPS6KB2;SLC27A3;PCK2
Hepatocellular carcinoma	20/168	0.0689657	1.16137	0.592787	0	0	1.48616	3.97421	SMARCD1;MAP2K2;SMARCC2;SMARCD3;GSTP1;ARAF;PIK3R2;BRAF;ARID1A;GADD45G;DDB2;APC;RPS6KB1;DPF1;DVL1;RPS6KB2;DVL3;PLCG1;HRAS;MET
HIF-1 signaling pathway	14/109	0.0704712	1.15199	0.592787	0	0	1.61954	4.29592	CAMK2B;MAP2K2;PIK3R2;ENO2;ENO3;LDHA;PFKL;RPS6KB1;MKNK2;RPS6KB2;PLCG1;ALDOA;PFKP;PDK1
Thyroid hormone signaling pathway	15/121	0.0801022	1.09636	0.627115	0	0	1.55515	3.92591	PFKFB2;NOTCH3;MAP2K2;TSC2;PIK3R2;SLC9A1;MED13L;KAT2B;KAT2A;PLCB3;PFKL;MED24;PLCG1;HRAS;PFKP
Axon guidance	21/182	0.0824183	1.08398	0.627115	0	0	1.43431	3.57996	EPHB6;CAMK2B;SEMA6C;SEMA4A;ROCK2;SEMA3B;SEMA4C;PIK3R2;SEMA3F;SSH3;NFATC4;CDK5;FES;PLXNA1;PLXNB2;PLXNB1;PLCG1;HRAS;MET;EPHB3;PLXNA3
Viral carcinogenesis	23/203	0.0839969	1.07574	0.627115	0	0	1.40532	3.48095	HDAC5;VAC14;GSN;DDX3X;TBP;HDAC10;HDAC11;UBR4;SCRIB;PIK3R2;UBE3A;CHD4;GTF2H2;GTF2H4;HDAC6;NFKB2;HDAC7;KAT2B;KAT2A;IRF3;CDK2;HRAS;JAK3
Thyroid cancer	1937-06-01	0.0845898	1.07268	0.627115	0	0	2.12427	5.24683	MAP2K2;TPR;BRAF;HRAS;DDB2;GADD45G
GnRH signaling pathway	1993-12-01	0.0868544	1.06121	0.627115	0	0	1.6274	3.97659	CAMK2B;MAPK11;PLCB3;MAP2K2;MAPK7;PRKCD;ADCY3;PTK2B;HRAS;CALM2;ADCY6;PLD2
mTOR signaling pathway	18/154	0.0928187	1.03236	0.627115	0	0	1.45476	3.45813	ATP6V1G1;MAP2K2;TSC2;PIK3R2;BRAF;WDR24;IKBKB;FLCN;STK11;RPS6KB1;DVL1;RPS6KB2;MLST8;DVL3;ULK1;DEPDC5;HRAS;TELO2
Nucleotide excision repair	1947-07-01	0.0942218	1.02585	0.627115	0	0	1.9209	4.53737	ERCC1;ERCC2;ERCC5;GTF2H2;POLE;GTF2H4;DDB2
Other types of O-glycan biosynthesis	1947-07-01	0.0942218	1.02585	0.627115	0	0	1.9209	4.53737	B4GALT2;POMT2;LFNG;POMT1;B3GLCT;RFNG;COLGALT1
Glioma	1975-10-01	0.0942865	1.02555	0.627115	0	0	1.68944	3.98947	CAMK2B;MAP2K2;ARAF;PIK3R2;BRAF;PLCG1;HRAS;CALM2;DDB2;GADD45G
Pancreatic cancer	1976-10-01	0.100879	0.996199	0.630554	0	0	1.66375	3.81637	IKBKB;RPS6KB1;RPS6KB2;ARAF;PIK3R2;BRAF;RALGDS;DDB2;PLD2;GADD45G
Acute myeloid leukemia	1967-09-01	0.104969	0.978939	0.630554	0	0	1.70363	3.84014	IKBKB;MAP2K2;RPS6KB1;RPS6KB2;ARAF;PIK3R2;BRAF;HRAS;PPARD
Glycolysis / Gluconeogenesis	1967-09-01	0.104969	0.978939	0.630554	0	0	1.70363	3.84014	LDHA;PFKL;G6PC3;ADPGK;ENO2;ALDOA;ENO3;PFKP;PCK2
Endometrial cancer	1958-08-01	0.108707	0.963743	0.630554	0	0	1.75635	3.89751	MAP2K2;APC;ARAF;PIK3R2;BRAF;HRAS;DDB2;GADD45G
Apelin signaling pathway	16/137	0.108769	0.963494	0.630554	0	0	1.45287	3.22323	NOTCH3;HDAC5;MAP2K2;JAG1;SPHK2;PDE3B;PRKAG1;ADCY3;ADCY6;SLC9A1;PLCB3;RPS6KB1;GNB2;RPS6KB2;CALM2;HRAS
Yersinia infection	16/137	0.108769	0.963494	0.630554	0	0	1.45287	3.22323	MAP2K2;ROCK2;WIPF2;ARPC1B;FN1;PIK3R2;BAIAP2;IKBKB;MAPK11;IRAK1;IRF3;PTK2B;ARHGEF1;PLCG1;ITGA5;LAT
Fc gamma R-mediated phagocytosis	1997-12-01	0.110237	0.957674	0.630554	0	0	1.55048	3.419	GSN;MYO10;RPS6KB1;SPHK2;ARPC1B;PRKCD;RPS6KB2;INPPL1;PIK3R2;PLCG1;LAT;PLD2
RNA polymerase	2023-05-31	0.112578	0.948548	0.631318	0	0	2.10997	4.6084	POLR3A;POLR3GL;POLR1B;POLR3D;POLR2I
N-Glycan biosynthesis	1950-07-01	0.1211	0.916854	0.656896	0	0	1.78659	3.77174	B4GALT2;DPAGT1;RPN2;MAN2A2;MGAT4B;ALG1;DDOST
Bladder cancer	1941-06-01	0.124029	0.906476	0.656896	0	0	1.88109	3.92627	MAP2K2;ARAF;BRAF;THBS1;HRAS;FGFR3
Homologous recombination	1941-06-01	0.124029	0.906476	0.656896	0	0	1.88109	3.92627	MUS81;TOP3B;RAD52;RBBP8;RAD54L;ATM
Shigellosis	26/246	0.128491	0.891126	0.668155	0	0	1.29928	2.66599	RNF31;ROCK2;ARPC1B;PIK3R2;FNBP1L;U2AF1L4;IKBKB;SHARPIN;PLCG1;CAST;PRKCD;GLMN;WIPI2;MAPK11;PLCB3;IRF3;RPS6KB1;ATG16L1;RPS6KB2;ATM;RBCK1;ARHGEF2;ITGA5;TECPR1;CD44;PPID
Hepatitis B	18/162	0.131722	0.880343	0.672722	0	0	1.37334	2.78384	MAP2K2;DDX3X;STAT2;ARAF;PIK3R2;BRAF;HSPG2;NFATC4;DDB2;IKBKB;MAPK11;IRAK1;IRF3;CDK2;PTK2B;STAT6;HRAS;JAK3
Fructose and mannose metabolism	1933-05-01	0.137516	0.861646	0.689993	0	0	1.95904	3.88676	PFKFB2;PFKL;GMPPA;ALDOA;PFKP
Longevity regulating pathway	12/102	0.14412	0.841275	0.691195	0	0	1.46394	2.8358	STK11;RPS6KB1;EHMT2;RB1CC1;RPS6KB2;PRKAG1;TSC2;ADCY3;ULK1;PIK3R2;HRAS;ADCY6
Vascular smooth muscle contraction	15/133	0.144926	0.838853	0.691195	0	0	1.39608	2.69657	RAMP2;MAP2K2;PPP1R12A;ROCK2;NPR2;PRKCD;ARAF;ADCY3;BRAF;ADCY6;MYL6;PLCB3;ARHGEF1;CALM2;PPP1R12C
Small cell lung cancer	1992-11-01	0.145262	0.837847	0.691195	0	0	1.49089	2.87624	IKBKB;LAMA5;TRAF4;ITGA3;LAMB2;ITGA2B;CDK2;FN1;PIK3R2;DDB2;GADD45G
Regulation of actin cytoskeleton	23/218	0.147423	0.831435	0.691195	0	0	1.29615	2.48141	CYFIP1;GSN;MAP2K2;PPP1R12A;ITGA3;ROCK2;ARPC1B;ITGA2B;ARAF;FN1;PIK3R2;BRAF;BAIAP2;IQGAP3;SSH3;SLC9A1;APC;ARHGEF1;ITGA5;HRAS;FGFR3;PPP1R12C;GIT1
Cell cycle	14/124	0.154087	0.812233	0.699891	0	0	1.39755	2.61374	ANAPC13;BUB1B;CDC7;PKMYT1;CDC25A;CDC25B;GADD45G;ORC5;MAD2L2;TFDP1;CDC45;CDK2;ATM;ANAPC2
Inositol phosphate metabolism	1973-09-01	0.154536	0.810972	0.699891	0	0	1.54341	2.88206	INPP5B;PLCB3;ISYNA1;INPP5E;INPPL1;PLCG1;SYNJ2;PI4KB;PI4K2A
C-type lectin receptor signaling pathway	12/104	0.159066	0.798422	0.699891	0	0	1.43196	2.63256	IKBKB;PLK3;CYLD;MAPK11;STAT2;PRKCD;PIK3R2;LSP1;CALM2;HRAS;NFATC4;NFKB2
NF-kappa B signaling pathway	12/104	0.159066	0.798422	0.699891	0	0	1.43196	2.63256	IKBKB;CYLD;PIDD1;IRAK1;PLAU;TRIM25;TNFAIP3;ATM;PLCG1;LAT;GADD45G;NFKB2
Breast cancer	16/147	0.167712	0.775437	0.726751	0	0	1.34123	2.39477	JAG2;NOTCH3;MAP2K2;JAG1;ARAF;PIK3R2;BRAF;GADD45G;NFKB2;DDB2;APC;RPS6KB1;DVL1;RPS6KB2;DVL3;HRAS
Collecting duct acid secretion	2023-04-27	0.185373	0.731954	0.791292	0	0	1.90731	3.21456	ATP6V1G1;TCIRG1;SLC12A7;ATP6V0A1
Purine metabolism	14/129	0.190288	0.720589	0.800329	0	0	1.33642	2.2174	RRM1;NPR2;PDE3B;ADCY3;AMPD2;NUDT5;PFAS;ADCY6;APRT;PPAT;IMPDH2;PDE4A;NT5M;PDE7A
Sphingolipid signaling pathway	13/119	0.194949	0.710078	0.80805	0	0	1.34618	2.20102	CERS5;MAP2K2;ASAH2;SPHK2;ROCK2;PPP2R5B;PIK3R2;PLD2;MAPK11;PLCB3;HRAS;CERS1;NSMAF
Amino sugar and nucleotide sugar metabolism	1948-06-01	0.210046	0.677686	0.852688	0	0	1.56697	2.44515	CYB5R1;GALT;NAGK;GMPPA;CYB5RL;RENBP
Human T-cell leukemia virus 1 infection	22/219	0.213578	0.670444	0.852688	0	0	1.22633	1.89315	VAC14;RANBP3;MAP2K2;TBP;TRRAP;CRTC1;ADCY3;GPS2;BUB1B;PIK3R2;ADCY6;NFATC4;NFKB2;IKBKB;KAT2B;KAT2A;XPO1;CDK2;ATM;HRAS;JAK3;ANAPC2
Oxytocin signaling pathway	16/154	0.217082	0.663377	0.852688	0	0	1.2727	1.94403	CAMK2B;MAP2K2;PPP1R12A;ROCK2;NPR2;PRKAG1;ADCY3;ADCY6;NFATC4;CACNB3;MYL6;PLCB3;MAPK7;CALM2;HRAS;PPP1R12C
Renal cell carcinoma	1969-08-01	0.217644	0.662253	0.852688	0	0	1.43876	2.19396	FLCN;MAP2K2;TFE3;ARAF;PIK3R2;BRAF;HRAS;MET
Rap1 signaling pathway	21/210	0.226325	0.645267	0.874716	0	0	1.21994	1.81256	MAP2K2;CSF1;ITGA2B;VEGFB;ADCY3;ARAP3;PIK3R2;BRAF;THBS1;ADCY6;MAPK11;PLCB3;SIPA1L1;EVL;PLCG1;RALGDS;CALM2;HRAS;FGFR3;MET;LAT
Vibrio cholerae infection	1950-06-01	0.237762	0.623858	0.878203	0	0	1.49558	2.14838	ATP6V0B;ATP6V1G1;ADCY3;TCIRG1;PLCG1;ATP6V0A1
Th1 and Th2 cell differentiation	1992-10-01	0.239059	0.621496	0.878203	0	0	1.33794	1.91466	IKBKB;JAG2;NOTCH3;MAPK11;JAG1;STAT6;PLCG1;IL12RB1;JAK3;LAT
Citrate cycle (TCA cycle)	2023-04-30	0.23951	0.620676	0.878203	0	0	1.68696	2.41094	IDH3G;OGDHL;IDH3A;PCK2
Pentose phosphate pathway	2023-04-30	0.23951	0.620676	0.878203	0	0	1.68696	2.41094	PFKL;PGD;ALDOA;PFKP
Peroxisome	1982-09-01	0.245854	0.609322	0.890055	0	0	1.35246	1.89752	ABCD4;PEX16;PECR;PEX19;PEX6;PEX11A;PEX5;MPV17;PEX1
Melanoma	1972-08-01	0.252774	0.597267	0.903668	0	0	1.3711	1.88561	MAP2K2;ARAF;PIK3R2;BRAF;HRAS;MET;DDB2;GADD45G
p53 signaling pathway	1973-08-01	0.264865	0.576975	0.935203	0	0	1.34993	1.79343	PIDD1;CDK2;TSC2;ATM;GTSE1;THBS1;DDB2;GADD45G
ErbB signaling pathway	1985-09-01	0.279764	0.553208	0.975762	0	0	1.29886	1.6545	CAMK2B;MAP2K2;RPS6KB1;RPS6KB2;ARAF;PIK3R2;BRAF;PLCG1;HRAS
Apoptosis	14/142	0.299923	0.52299	0.985718	0	0	1.19983	1.44487	PARP3;MAP2K2;PARP2;HTRA2;PIK3R2;PTPN13;LMNB2;GADD45G;IKBKB;PIDD1;ATM;BIRC6;CTSF;HRAS
Thermogenesis	22/232	0.300347	0.522377	0.985718	0	0	1.14959	1.38275	SMARCD1;SMARCC2;SMARCD3;NDUFB10;NDUFA3;PRKAG1;ADCY3;TSC2;SIRT6;CPT1C;COX6C;ARID1A;ADCY6;MAPK11;RPS6KB1;DPF1;RPS6KB2;UQCRC1;MLST8;SLC25A20;HRAS;COX20
Protein export	2023-03-23	0.301626	0.520532	0.985718	0	0	1.64434	1.97086	SRP72;SRP9;SEC63
Chronic myeloid leukemia	1976-08-01	0.302065	0.519899	0.985718	0	0	1.29016	1.54447	IKBKB;MAP2K2;ARAF;PIK3R2;BRAF;HRAS;DDB2;GADD45G
Glycerophospholipid metabolism	1998-10-01	0.303274	0.518165	0.985718	0	0	1.24631	1.487	LYPLA2;PCYT2;CHKB;CHKA;PNPLA7;LPCAT4;DGKQ;PNPLA6;TAZ;PLD2
Focal adhesion	19/201	0.322779	0.491094	0.985718	0	0	1.14526	1.29504	LAMA5;PPP1R12A;ITGA3;ROCK2;LAMB2;ITGA2B;FN1;VEGFB;PIK3R2;BRAF;THBS1;THBS3;COL1A1;ZYX;FLNA;ITGA5;HRAS;MET;PPP1R12C
ABC transporters	1945-05-01	0.322968	0.49084	0.985718	0	0	1.37043	1.54886	ABCD4;ABCA2;ABCA3;ABCA7;ABCC10
Basal transcription factors	1945-05-01	0.322968	0.49084	0.985718	0	0	1.37043	1.54886	TBP;ERCC2;GTF2IRD1;GTF2H2;GTF2H4
Cellular senescence	15/156	0.325073	0.488019	0.985718	0	0	1.16688	1.31122	MAP2K2;LIN37;TSC2;PIK3R2;FOXM1;CDC25A;GADD45G;NFATC4;MAPK11;CDK2;ATM;CALM2;HRAS;PPID;RAD9A
AGE-RAGE signaling pathway in diabetic complications	10/100	0.325593	0.487325	0.985718	0	0	1.21848	1.36727	COL1A1;MAPK11;PLCB3;PRKCD;FN1;VEGFB;PIK3R2;PLCG1;AGER;HRAS
Pyrimidine metabolism	1956-06-01	0.326184	0.486538	0.985718	0	0	1.31568	1.47395	RRM1;CAD;TK2;NT5M;TK1;UCKL1
PD-L1 expression and PD-1 checkpoint pathway in cancer	1989-09-01	0.326787	0.485736	0.985718	0	0	1.23365	1.37977	IKBKB;MAPK11;MAP2K2;RPS6KB1;RPS6KB2;PIK3R2;PLCG1;HRAS;LAT
Long-term potentiation	1967-07-01	0.327424	0.48489	0.985718	0	0	1.2792	1.42823	CAMK2B;PLCB3;MAP2K2;ARAF;BRAF;HRAS;CALM2
Amyotrophic lateral sclerosis	33/364	0.339643	0.468977	0.999995	0	0	1.094	1.18137	NUP205;NXT1;NUP188;NDUFB10;WDR41;HDAC6;NXF1;KLC3;ACTR1B;KLC2;KIF5C;RB1CC1;TPR;ANXA7;NUP88;HNRNPA1;XBP1;FUS;NDUFA3;ANXA11;WIPI2;COX6C;ATXN2L;MAPK11;HNRNPA2B1;UQCRC1;ATG2A;ULK1;NUP54;NUP98;HAP1;TARDBP;SRSF7
Morphine addiction	1991-09-01	0.350845	0.454885	0.999995	0	0	1.20343	1.26048	GRK2;GNB2;PDE3B;GRK6;PDE4A;ADCY3;ARRB2;PDE7A;ADCY6
Pathways in cancer	47/531	0.363456	0.439548	0.999995	0	0	1.06561	1.0785	CAMK2B;NOTCH3;LAMA5;ROCK2;GSTP1;ITGA2B;ARAF;ADCY3;PIK3R2;CSF2RA;ADCY6;PLD2;IKBKB;DVL1;TPR;DVL3;STAT6;PLCG1;IL12RB1;JAK3;RALGDS;HRAS;JAG2;JAG1;MAP2K2;ITGA3;LAMB2;STAT2;FN1;VEGFB;BRAF;DDB2;NFKB2;GADD45G;PLCB3;TRAF4;APC;RPS6KB1;MSH3;GNB2;CDK2;RPS6KB2;ARHGEF1;MET;CALM2;FGFR3;PPARD
Gastric cancer	14/149	0.365294	0.437358	0.999995	0	0	1.13718	1.1452	MAP2K2;ARAF;PIK3R2;BRAF;GADD45G;DDB2;APC;RPS6KB1;DVL1;CDK2;RPS6KB2;DVL3;HRAS;MET
Prolactin signaling pathway	1970-07-01	0.369293	0.432629	0.999995	0	0	1.21809	1.21341	MAPK11;MAP2K2;GALT;PIK3R2;SOCS6;HRAS;SOCS5
VEGF signaling pathway	1959-06-01	0.372036	0.429415	0.999995	0	0	1.241	1.22706	MAPK11;MAP2K2;SPHK2;PIK3R2;PLCG1;HRAS
Alanine, aspartate and glutamate metabolism	1937-04-01	0.374866	0.426124	0.999995	0	0	1.32861	1.30362	ALDH4A1;PPAT;CAD;GPT
Ubiquitin mediated proteolysis	13/140	0.389318	0.409695	0.999995	0	0	1.12228	1.05872	ANAPC13;UBA7;SMURF1;MGRN1;SYVN1;UBE3A;UBE2J2;RHOBTB2;DDB2;ITCH;BIRC6;STUB1;ANAPC2
Oocyte meiosis	12/129	0.394472	0.403984	0.999995	0	0	1.12444	1.04596	CAMK2B;MAD2L2;ANAPC13;MAPK11;SLK;CDK2;PPP2R5B;ADCY3;PKMYT1;CALM2;ADCY6;ANAPC2
Phosphonate and phosphinate metabolism	2023-01-06	0.407976	0.389365	0.999995	0	0	2.19163	1.96489	PCYT2
Vitamin B6 metabolism	2023-01-06	0.407976	0.389365	0.999995	0	0	2.19163	1.96489	PNPO
Signaling pathways regulating pluripotency of stem cells	13/143	0.419362	0.377411	0.999995	0	0	1.0962	0.952626	MAP2K2;SETDB1;PCGF2;PIK3R2;ACVR2B;MAPK11;APC;DVL1;DVL3;PCGF1;FGFR3;HRAS;JAK3
Spinocerebellar ataxia	13/143	0.419362	0.377411	0.999995	0	0	1.0962	0.952626	NOP56;XBP1;TBP;PIK3R2;WIPI2;ATXN2L;PLCB3;RB1CC1;ATXN1L;PPIF;ATG2A;ULK1;CIC
Prostate cancer	1997-09-01	0.424	0.372634	0.999995	0	0	1.121	0.961847	IKBKB;MAP2K2;PLAU;GSTP1;CDK2;ARAF;PIK3R2;BRAF;HRAS
Inflammatory mediator regulation of TRP channels	1998-09-01	0.436208	0.360306	0.999995	0	0	1.10835	0.919525	CAMK2B;MAPK11;PLCB3;PRKCD;ADCY3;PIK3R2;PLCG1;CALM2;ADCY6
Chemokine signaling pathway	17/192	0.440262	0.356289	0.999995	0	0	1.06482	0.87356	ROCK2;STAT2;PRKCD;ADCY3;PIK3R2;BRAF;ARRB2;ADCY6;IKBKB;PLCB3;GRK2;GNB2;GRK6;PTK2B;PLCG1;HRAS;JAK3
Fatty acid biosynthesis	2023-02-18	0.451503	0.34534	0.999995	0	0	1.36976	1.0892	MECR;FASN
Gastric acid secretion	1976-07-01	0.453431	0.343488	0.999995	0	0	1.1118	0.879336	CAMK2B;PLCB3;ADCY3;SLC4A2;CALM2;ADCY6;SLC9A1
Bacterial invasion of epithelial cells	1977-07-01	0.467302	0.330402	0.999995	0	0	1.09586	0.833706	MAD2L2;ARPC1B;FN1;ELMO3;PIK3R2;ITGA5;MET
Phospholipase D signaling pathway	13/148	0.46942	0.328439	0.999995	0	0	1.05531	0.79809	MAP2K2;SPHK2;TSC2;ADCY3;PIK3R2;ADCY6;PLD2;PLCB3;DGKQ;PTK2B;PLCG1;RALGDS;HRAS
Melanogenesis	9/101	0.472632	0.325477	0.999995	0	0	1.07203	0.80342	CAMK2B;PLCB3;MAP2K2;DVL1;DVL3;ADCY3;CALM2;HRAS;ADCY6
Synaptic vesicle cycle	1978-07-01	0.481087	0.317776	0.999995	0	0	1.08036	0.790509	ATP6V0B;ATP6V1G1;SLC6A9;AP2A1;TCIRG1;VAMP2;ATP6V0A1
Circadian rhythm	2023-03-31	0.486458	0.312955	0.999995	0	0	1.17402	0.846002	PER1;CRY2;PRKAG1
MAPK signaling pathway	25/294	0.496412	0.304158	0.999995	0	0	1.01836	0.713207	CSF1;ARAF;ARRB2;RPS6KA4;IKBKB;MAPK7;IRAK1;MKNK2;FLNA;HRAS;MAP4K2;MAP2K2;DUSP1;VEGFB;BRAF;MAPK8IP3;GADD45G;CDC25B;NFKB2;MAPK11;CACNB3;MAPKAPK5;FGFR3;MET;MAP3K11
PI3K-Akt signaling pathway	30/354	0.498267	0.302538	0.999995	0	0	1.01457	0.706771	LAMA5;CSF1;PKN3;ITGA2B;PIK3R2;THBS1;THBS3;IKBKB;STK11;MLST8;HRAS;JAK3;PCK2;MAP2K2;ITGA3;LAMB2;FN1;VEGFB;PPP2R5B;TSC2;COL1A1;G6PC3;RPS6KB1;GNB2;CDK2;RPS6KB2;SGK3;ITGA5;FGFR3;MET
Riboflavin metabolism	2023-01-08	0.502909	0.298511	0.999995	0	0	1.56528	1.07589	ACP2
Sulfur relay system	2023-01-08	0.502909	0.298511	0.999995	0	0	1.56528	1.07589	MOCS2
Pathways of neurodegeneration	40/475	0.506767	0.295192	0.999995	0	0	1.0075	0.6848	CAMK2B;CSF1;NDUFB10;UBA7;ARAF;WDR41;HTT;HTRA2;UBE2J2;AGER;KLC3;KLC2;ACTR1B;KIF5C;RB1CC1;DVL1;ATXN1L;DVL3;PLCG1;HRAS;XBP1;MAP2K2;FUS;NDUFA3;BRAF;WIPI2;COX6C;ATXN2L;MAPK11;PLCB3;CDK5;APC;UQCRC1;ATG2A;PPIF;ULK1;HAP1;TARDBP;CALM2;PPID
Vasopressin-regulated water reabsorption	1944-04-01	0.508164	0.293996	0.999995	0	0	1.09569	0.741725	ARHGDIG;ADCY3;ADCY6;VAMP2
Hedgehog signaling pathway	1956-05-01	0.50821	0.293957	0.999995	0	0	1.0742	0.727083	GRK2;MGRN1;SMURF1;ARRB2;MEGF8
Fc epsilon RI signaling pathway	1968-06-01	0.508268	0.293907	0.999995	0	0	1.06034	0.717578	MAPK11;MAP2K2;PIK3R2;PLCG1;HRAS;LAT
Mitophagy	1968-06-01	0.508268	0.293907	0.999995	0	0	1.06034	0.717578	RHOT2;ATG9A;TFE3;ULK1;TBC1D17;HRAS
Relaxin signaling pathway	11/129	0.519418	0.284483	0.999995	0	0	1.02133	0.669019	COL1A1;MAPK11;PLCB3;MAP2K2;GNB2;VEGFB;ADCY3;PIK3R2;ARRB2;HRAS;ADCY6
Adipocytokine signaling pathway	1969-06-01	0.522839	0.281632	0.999995	0	0	1.04345	0.676658	IKBKB;STK11;G6PC3;PRKAG1;CPT1C;PCK2
SNARE interactions in vesicular transport	1933-03-01	0.529225	0.27636	0.999995	0	0	1.09563	0.697194	VTI1A;USE1;VAMP2
Parathyroid hormone synthesis, secretion and action	9/106	0.532056	0.274043	0.999995	0	0	1.01649	0.641414	PLCB3;ARAF;PDE4A;ADCY3;BRAF;ARHGEF1;ARRB2;ADCY6;PLD2
RIG-I-like receptor signaling pathway	1970-06-01	0.537234	0.269837	0.999995	0	0	1.02709	0.638153	IKBKB;CYLD;MAPK11;DDX3X;IRF3;TRIM25
Non-alcoholic fatty liver disease	13/155	0.538196	0.26906	0.999995	0	0	1.00291	0.621333	MLXIP;SREBF1;XBP1;NDUFB10;NDUFA3;PRKAG1;PIK3R2;COX6C;IKBKB;MAPK11;ITCH;UQCRC1;MAP3K11
Endocytosis	21/252	0.540605	0.26712	0.999995	0	0	0.995818	0.612494	SH3GLB2;IST1;SMURF1;WIPF2;ARPC1B;SNX12;ARAP3;VPS37D;AP2A1;ARRB2;RAB22A;PLD2;ITCH;GRK2;KIF5C;GRK6;CHMP6;HRAS;FGFR3;GIT1;SH3GL1
Arginine biosynthesis	2023-02-22	0.559906	0.251885	0.999995	0	0	1.09557	0.635417	ACY1;GPT
Ribosome	13/158	0.566796	0.246573	0.999995	0	0	0.981994	0.557532	MRPS17;RPL3;RPS5;MRPS10;MRPS2;RPL23A;RPL10A;MRPL33;RPS4X;RPS27;RPS19;RPL27A;RPS2
Long-term depression	1960-05-01	0.570905	0.243436	0.999995	0	0	0.995858	0.55821	PLCB3;MAP2K2;ARAF;BRAF;HRAS
Protein processing in endoplasmic reticulum	14/171	0.573914	0.241153	0.999995	0	0	0.976645	0.542308	MBTPS1;XBP1;RPN2;PRKCSH;SYVN1;DERL2;EIF2AK4;UBE2J2;DDOST;DNAJC5;ERP29;PREB;STUB1;SEC63
Necroptosis	13/159	0.576178	0.239444	0.999995	0	0	0.975215	0.537674	CAMK2B;RNF31;USP21;STAT2;TNFAIP3;HMGB1;CYLD;SHARPIN;STAT6;RBCK1;CHMP6;JAK3;PPID
Sulfur metabolism	2023-01-10	0.582626	0.23461	0.999995	0	0	1.2173	0.6576	SELENBP1
Proximal tubule bicarbonate reclamation	2023-02-23	0.584504	0.233213	0.999995	0	0	1.04334	0.560268	SLC25A10;PCK2
Renin-angiotensin system	2023-02-23	0.584504	0.233213	0.999995	0	0	1.04334	0.560268	CTSA;THOP1
Alzheimer disease	30/369	0.593061	0.2269	0.999995	0	0	0.968873	0.506195	CSF1;NDUFB10;ARAF;PIK3R2;AGER;APH1A;IKBKB;KLC3;KLC2;KIF5C;RB1CC1;DVL1;DVL3;HRAS;PSENEN;XBP1;MAP2K2;NDUFA3;BRAF;WIPI2;COX6C;PLCB3;CDK5;APC;UQCRC1;ATG2A;PPIF;ULK1;CALM2;PPID
Platelet activation	10/124	0.595474	0.225137	0.999995	0	0	0.960692	0.498021	COL1A1;MAPK11;PLCB3;PPP1R12A;ROCK2;ITGA2B;ADCY3;PIK3R2;ARHGEF1;ADCY6
Human immunodeficiency virus 1 infection	17/212	0.608864	0.21548	0.999995	0	0	0.954552	0.473612	MAP2K2;PIK3R2;SAMHD1;NFATC4;IKBKB;MAPK11;IRAK1;AP1G2;IRF3;RPS6KB1;GNB2;RPS6KB2;PTK2B;ATM;PLCG1;CALM2;HRAS
Arginine and proline metabolism	1950-04-01	0.611261	0.213774	0.999995	0	0	0.952458	0.46883	GAMT;ALDH4A1;P4HA1;PRODH
Human cytomegalovirus infection	18/225	0.614028	0.211812	0.999995	0	0	0.952056	0.464332	MAP2K2;ROCK2;ADCY3;TSC2;PIK3R2;ADCY6;NFATC4;IKBKB;MAPK11;PLCB3;IRF3;RPS6KB1;GNB2;RPS6KB2;PTK2B;ARHGEF1;CALM2;HRAS
Basal cell carcinoma	1963-05-01	0.615066	0.211078	0.999995	0	0	0.944193	0.458901	APC;DVL1;DVL3;DDB2;GADD45G
Cytosolic DNA-sensing pathway	1963-05-01	0.615066	0.211078	0.999995	0	0	0.944193	0.458901	IKBKB;POLR3A;IRF3;POLR3GL;POLR3D
Taurine and hypotaurine metabolism	2023-01-11	0.617557	0.209323	0.999995	0	0	1.09551	0.528021	CSAD
Ubiquinone and other terpenoid-quinone biosynthesis	2023-01-11	0.617557	0.209323	0.999995	0	0	1.09551	0.528021	COQ2
Neutrophil extracellular trap formation	15/189	0.622983	0.205524	0.999995	0	0	0.943856	0.446667	HDAC5;MAP2K2;HDAC10;HDAC11;ITGA2B;PIK3R2;HMGB1;AGER;HDAC6;HDAC7;MAPK11;PLCB3;CLCN4;PPIF;PLCG1
Primary immunodeficiency	1938-03-01	0.62671	0.202933	0.999995	0	0	0.938854	0.438699	RFX5;RFXANK;JAK3
GnRH secretion	1964-05-01	0.629178	0.201226	0.999995	0	0	0.928139	0.430044	PLCB3;MAP2K2;PIK3R2;ARRB2;HRAS
Glycosylphosphatidylinositol (GPI)-anchor biosynthesis	2023-02-26	0.65211	0.185679	0.999995	0	0	0.912777	0.390251	PIGS;GPAA1
Cushing syndrome	12/155	0.652952	0.185118	0.999995	0	0	0.918682	0.391589	CAMK2B;KMT2D;PLCB3;MAP2K2;KMT2A;APC;DVL1;CDK2;DVL3;ADCY3;BRAF;ADCY6
Ras signaling pathway	18/232	0.665868	0.176612	0.999995	0	0	0.920558	0.374357	MAP2K2;CSF1;VEGFB;PIK3R2;PLD2;IKBKB;SYNGAP1;RASA4;GNB2;PLCG1;RIN1;RALGDS;CALM2;RGL2;HRAS;FGFR3;MET;LAT
Salivary secretion	1993-07-01	0.669536	0.174226	0.999995	0	0	0.891196	0.357521	PLCB3;ADCY3;SLC4A2;CALM2;VAMP2;ADCY6;SLC9A1
Non-homologous end-joining	2023-01-13	0.678897	0.168196	0.999995	0	0	0.912829	0.353526	POLM
TGF-beta signaling pathway	1994-07-01	0.680488	0.167179	0.999995	0	0	0.880904	0.339099	TFDP1;RPS6KB1;SMURF1;RPS6KB2;CHRD;THBS1;ACVR2B
Regulation of lipolysis in adipocytes	1955-04-01	0.686178	0.163563	0.999995	0	0	0.858845	0.323457	PDE3B;ADCY3;PIK3R2;ADCY6
Dilated cardiomyopathy	1996-07-01	0.701693	0.153853	0.999995	0	0	0.861014	0.305022	CACNB3;ITGA3;TNNT2;ITGA2B;ADCY3;ITGA5;ADCY6
Fat digestion and absorption	1943-03-01	0.70935	0.14914	0.999995	0	0	0.821272	0.28203	SLC27A1;DGAT1;MTTP
Porphyrin and chlorophyll metabolism	1943-03-01	0.70935	0.14914	0.999995	0	0	0.821272	0.28203	MMAB;PPOX;EARS2
Circadian entrainment	1997-07-01	0.711941	0.147556	0.999995	0	0	0.851401	0.289272	CAMK2B;PER1;PLCB3;GNB2;ADCY3;CALM2;ADCY6
Adrenergic signaling in cardiomyocytes	11/150	0.718936	0.14331	0.999995	0	0	0.866028	0.285774	CAMK2B;MAPK11;CACNB3;PLCB3;TNNT2;PPP2R5B;ADCY3;CALM2;SCN1B;ADCY6;SLC9A1
TNF signaling pathway	8/112	0.729325	0.137079	0.999995	0	0	0.841903	0.265735	RPS6KA4;IKBKB;MAPK11;ITCH;JAG1;CSF1;TNFAIP3;PIK3R2
Fluid shear stress and atherosclerosis	10/139	0.735392	0.133481	0.999995	0	0	0.848285	0.260722	IKBKB;MAPK11;MAPK7;DUSP1;GSTP1;ITGA2B;PIK3R2;ARHGEF2;CALM2;ACVR2B
Wnt signaling pathway	12/166	0.742176	0.129493	0.999995	0	0	0.852545	0.254202	CAMK2B;TLE2;PLCB3;APC;DAAM2;TBL1XR1;ROCK2;CHD8;DVL1;DVL3;NFATC4;PPARD
Glutamatergic synapse	8/114	0.747187	0.126571	0.999995	0	0	0.825928	0.240709	PLCB3;GRK2;GNB2;ADCY3;HOMER3;SLC38A2;ADCY6;PLD2
Tuberculosis	13/180	0.749179	0.125415	0.999995	0	0	0.851598	0.245922	CAMK2B;PLK3;ATP6V0B;SPHK2;RFXANK;LSP1;TCIRG1;MAPK11;IRAK1;IRAK2;RFX5;CALM2;ATP6V0A1
cGMP-PKG signaling pathway	12/167	0.749473	0.125244	0.999995	0	0	0.846999	0.244262	PLCB3;MAP2K2;PPP1R12A;ROCK2;NPR2;PDE3B;PPIF;ADCY3;GTF2IRD1;CALM2;ADCY6;NFATC4
Type II diabetes mellitus	1946-03-01	0.751753	0.123925	0.999995	0	0	0.763849	0.217963	IKBKB;PRKCD;PIK3R2
PPAR signaling pathway	1974-05-01	0.752051	0.123753	0.999995	0	0	0.793192	0.226021	SLC27A1;PLIN4;CPT1C;PPARD;PCK2
Gap junction	1988-06-01	0.755403	0.121821	0.999995	0	0	0.80084	0.224639	PLCB3;MAP2K2;MAPK7;ADCY3;HRAS;ADCY6
Tight junction	12/169	0.763648	0.117107	0.999995	0	0	0.836117	0.225458	STK11;MYL6;ROCK2;ARPC1B;PRKAG1;MICALL2;SCRIB;CGN;ARHGEF2;LLGL1;TJAP1;LLGL2
Carbohydrate digestion and absorption	1947-03-01	0.764734	0.11649	0.999995	0	0	0.746448	0.200218	PLCB3;G6PC3;PIK3R2
Pertussis	1976-05-01	0.772563	0.112066	0.999995	0	0	0.770764	0.19889	MAPK11;IRF3;IRAK1;ITGA5;CALM2
Primary bile acid biosynthesis	2023-01-17	0.773653	0.111454	0.999995	0	0	0.684472	0.175658	HSD3B7
Hypertrophic cardiomyopathy	1990-06-01	0.774198	0.111148	0.999995	0	0	0.781687	0.200055	CACNB3;ITGA3;TNNT2;ITGA2B;PRKAG1;ITGA5
Salmonella infection	18/249	0.774556	0.110947	0.999995	0	0	0.852011	0.21766	CYFIP1;MAP2K2;ROCK2;ARPC1B;FHOD1;M6PR;GCC2;IKBKB;MAPK11;KLC3;ACTR1B;KLC2;IRAK1;KIF5C;VPS11;FLNA;PLEKHM2;HRAS
T cell receptor signaling pathway	7/104	0.776966	0.109598	0.999995	0	0	0.789656	0.199276	IKBKB;MAPK11;MAP2K2;PIK3R2;PLCG1;HRAS;LAT
Growth hormone synthesis, secretion and action	8/119	0.788177	0.103376	0.999995	0	0	0.788507	0.187691	MAPK11;PLCB3;MAP2K2;ADCY3;PIK3R2;PLCG1;HRAS;ADCY6
Ether lipid metabolism	1949-03-01	0.789036	0.102903	0.999995	0	0	0.713916	0.169158	LPCAT4;PAFAH1B1;PLD2
Propanoate metabolism	1934-02-01	0.789745	0.102513	0.999995	0	0	0.684283	0.161522	LDHA;ACADS
Cysteine and methionine metabolism	1950-03-01	0.800383	0.096702	0.999995	0	0	0.698688	0.155573	LDHA;MAT2A;MRI1
Malaria	1950-03-01	0.800383	0.096702	0.999995	0	0	0.698688	0.155573	MET;THBS1;THBS3
Th17 cell differentiation	7/107	0.801265	0.0962239	0.999995	0	0	0.76584	0.169682	IKBKB;MAPK11;STAT6;PLCG1;IL12RB1;JAK3;LAT
Nicotinate and nicotinamide metabolism	1935-02-01	0.803067	0.0952482	0.999995	0	0	0.663511	0.145519	NT5M;SIRT6
Lipid and atherosclerosis	15/215	0.803732	0.0948889	0.999995	0	0	0.819979	0.179157	CAMK2B;XBP1;ROCK2;MIB2;PIK3R2;AGER;IKBKB;MAPK11;PLCB3;IRAK1;IRF3;ARHGEF1;PLCG1;CALM2;HRAS
IL-17 signaling pathway	1994-06-01	0.808499	0.0923206	0.999995	0	0	0.745992	0.15858	IKBKB;MAPK11;MAPK7;TRAF4;TNFAIP3;IL17RA
Glycosaminoglycan degradation	2023-01-19	0.809967	0.0915328	0.999995	0	0	0.608353	0.128218	IDUA
Hippo signaling pathway	11/163	0.811506	0.090708	0.999995	0	0	0.791394	0.165293	APC;WWC1;DVL1;DVL3;SCRIB;LIMD1;WTIP;LLGL1;TEAD2;LLGL2;TEAD3
Aminoacyl-tRNA biosynthesis	1966-04-01	0.813348	0.0897237	0.999995	0	0	0.706044	0.145866	TARS2;VARS2;FARSA;EARS2
DNA replication	1936-02-01	0.815634	0.0885049	0.999995	0	0	0.643961	0.131233	RNASEH2A;POLE
Starch and sucrose metabolism	1936-02-01	0.815634	0.0885049	0.999995	0	0	0.643961	0.131233	G6PC3;GAA
B cell receptor signaling pathway	1981-05-01	0.818127	0.0871792	0.999995	0	0	0.719858	0.144503	IKBKB;MAP2K2;INPPL1;PIK3R2;HRAS
Coronavirus disease	16/232	0.823446	0.0843651	0.999995	0	0	0.809629	0.157277	RPL3;STAT2;RPS5;PIK3R2;RPL23A;RPL10A;IKBKB;RPS4X;MAPK11;RPS27;RPS19;IRAK1;IRF3;RPL27A;PLCG1;RPS2
Transcriptional misregulation in cancer	13/192	0.823612	0.0842775	0.999995	0	0	0.793983	0.154077	DDX5;KMT2A;FUS;TFE3;ASPSCR1;KLF3;GADD45G;DDB2;CDK9;PLAU;NFKBIZ;ATM;MET
One carbon pool by folate	2023-01-20	0.825878	0.0830841	0.999995	0	0	0.576303	0.110252	MTHFR
Steroid biosynthesis	2023-01-20	0.825878	0.0830841	0.999995	0	0	0.576303	0.110252	SOAT1
African trypanosomiasis	1937-02-01	0.827477	0.082244	0.999995	0	0	0.625528	0.118459	PLCB3;THOP1
Endocrine and other factor-regulated calcium reabsorption	1953-03-01	0.831386	0.0801973	0.999995	0	0	0.656659	0.121259	PLCB3;AP2A1;ADCY6
Glycosaminoglycan biosynthesis	1953-03-01	0.831386	0.0801973	0.999995	0	0	0.656659	0.121259	B4GALT2;NDST2;XYLT2
Measles	9/139	0.831534	0.0801198	0.999995	0	0	0.757087	0.139669	IKBKB;IRAK1;IRF3;STAT2;CDK2;TNFAIP3;PIK3R2;EIF2AK4;JAK3
NOD-like receptor signaling pathway	12/181	0.837026	0.0772611	0.999995	0	0	0.776234	0.138092	IKBKB;RNF31;MAPK11;PLCB3;SHARPIN;DHX33;IRF3;ATG16L1;STAT2;PRKCD;TNFAIP3;RBCK1
Renin secretion	1969-04-01	0.839625	0.0759146	0.999995	0	0	0.673347	0.117701	PLCB3;PDE3B;CALM2;ADCY6
Cholinergic synapse	7/113	0.843718	0.0738026	0.999995	0	0	0.722253	0.122737	CAMK2B;PLCB3;GNB2;ADCY3;PIK3R2;HRAS;ADCY6
Hematopoietic cell lineage	1999-06-01	0.845481	0.0728962	0.999995	0	0	0.705691	0.11845	CSF1;ITGA3;ITGA2B;ITGA5;CSF2RA;CD44
Hepatitis C	10/157	0.85511	0.0679781	0.999995	0	0	0.743677	0.116404	IKBKB;MAP2K2;IRF3;STAT2;CDK2;ARAF;PIK3R2;BRAF;EIF2AK4;HRAS
Insulin secretion	1986-05-01	0.856047	0.0675023	0.999995	0	0	0.675238	0.104952	CAMK2B;PLCB3;ADCY3;VAMP2;ADCY6
Influenza A	11/172	0.860898	0.0650483	0.999995	0	0	0.746784	0.111853	IKBKB;CPSF4;NXF1;MAP2K2;NXT1;XPO1;IRF3;STAT2;TRIM25;PIK3R2;NUP98
Cardiac muscle contraction	1987-05-01	0.862783	0.0640986	0.999995	0	0	0.666966	0.0984393	CACNB3;TNNT2;UQCRC1;COX6C;SLC9A1
Amoebiasis	6/102	0.864736	0.0631165	0.999995	0	0	0.683526	0.0993376	COL1A1;LAMA5;PLCB3;LAMB2;FN1;PIK3R2
Pancreatic secretion	6/102	0.864736	0.0631165	0.999995	0	0	0.683526	0.0993376	PLCB3;ADCY3;SLC4A2;ADCY6;TPCN2;SLC9A1
Mismatch repair	2023-01-23	0.866059	0.0624526	0.999995	0	0	0.497635	0.0715611	MSH3
Natural killer cell mediated cytotoxicity	8/131	0.866079	0.0624426	0.999995	0	0	0.711111	0.102243	MAP2K2;ARAF;PTK2B;PIK3R2;BRAF;PLCG1;HRAS;LAT
Glutathione metabolism	1957-03-01	0.866214	0.0623749	0.999995	0	0	0.607884	0.0873065	RRM1;GSTP1;PGD
Legionellosis	1957-03-01	0.866214	0.0623749	0.999995	0	0	0.607884	0.0873065	CLK1;HSF1;NFKB2
Dopaminergic synapse	8/132	0.87136	0.0598022	0.999995	0	0	0.705338	0.0971247	CAMK2B;MAPK11;PLCB3;KIF5C;GNB2;PPP2R5B;ARRB2;CALM2
Epstein-Barr virus infection	13/202	0.871923	0.0595219	0.999995	0	0	0.751559	0.103004	STAT2;TNFAIP3;PIK3R2;GADD45G;DDB2;NFKB2;IKBKB;MAPK11;IRAK1;IRF3;CDK2;JAK3;CD44
cAMP signaling pathway	14/216	0.873096	0.058938	0.999995	0	0	0.757196	0.102759	CAMK2B;MAP2K2;PPP1R12A;ROCK2;PDE3B;ADCY3;ARAP3;PIK3R2;BRAF;ADCY6;PLD2;SLC9A1;PDE4A;CALM2
GABAergic synapse	1989-05-01	0.87546	0.0577636	0.999995	0	0	0.651015	0.0865886	GNB2;ADCY3;HAP1;SLC38A2;ADCY6
Toll-like receptor signaling pathway	6/104	0.876434	0.057281	0.999995	0	0	0.669503	0.0883036	IKBKB;MAPK11;MAP2K2;IRAK1;IRF3;PIK3R2
Oxidative phosphorylation	8/133	0.87647	0.0572628	0.999995	0	0	0.699656	0.0922514	ATP6V1G1;ATP6V0B;NDUFB10;NDUFA3;UQCRC1;TCIRG1;COX6C;ATP6V0A1
JAK-STAT signaling pathway	10/162	0.8794	0.0558134	0.999995	0	0	0.719016	0.0924045	STAT2;PIK3R2;STAT6;SOCS6;IL12RB1;CSF2RA;HRAS;JAK3;SOCS5;CRLF2
Fatty acid degradation	1943-02-01	0.885163	0.0529766	0.999995	0	0	0.533812	0.065116	CPT1C;ACADS
Parkinson disease	16/249	0.89382	0.0487501	0.999995	0	0	0.749853	0.084172	CAMK2B;XBP1;NDUFB10;UBA7;DUSP1;NDUFA3;HTRA2;UBE2J2;COX6C;KLC3;KLC2;KIF5C;UQCRC1;PPIF;PLCG1;CALM2
Arrhythmogenic right ventricular cardiomyopathy	1977-04-01	0.894892	0.0482292	0.999995	0	0	0.599292	0.0665525	CACNB3;ITGA3;ITGA2B;ITGA5
Estrogen signaling pathway	8/137	0.895264	0.0480488	0.999995	0	0	0.677813	0.0749908	PLCB3;MAP2K2;PRKCD;ADCY3;PIK3R2;CALM2;HRAS;ADCY6
Folate biosynthesis	2023-01-26	0.896972	0.0472213	0.999995	0	0	0.437847	0.0476076	MOCS2
Drug metabolism	6/108	0.89729	0.0470672	0.999995	0	0	0.643107	0.0696974	RRM1;GSTP1;IMPDH2;TK2;TK1;UCKL1
Rheumatoid arthritis	1993-05-01	0.897844	0.0467989	0.999995	0	0	0.621287	0.066949	ATP6V0B;ATP6V1G1;CSF1;TCIRG1;ATP6V0A1
Glycosphingolipid biosynthesis	1945-02-01	0.900027	0.0457446	0.999995	0	0	0.508928	0.0536059	B4GALT2;B4GALNT1
Fatty acid elongation	2023-01-27	0.905601	0.0430631	0.999995	0	0	0.420984	0.0417432	MECR
Calcium signaling pathway	15/240	0.909191	0.0413446	0.999995	0	0	0.727865	0.0692924	CAMK2B;SPHK2;VEGFB;ADCY3;MCOLN1;TPCN2;TPCN1;PLCB3;PHKG2;PPIF;PTK2B;PLCG1;CALM2;FGFR3;MET
MicroRNAs in cancer	20/310	0.912349	0.0398391	0.999995	0	0	0.752529	0.0690318	NOTCH3;HDAC5;MAP2K2;PIK3R2;DICER1;THBS1;CDC25A;CDC25B;IKBKB;MAPK7;APC;PLAU;ATM;PLCG1;ITGA5;HRAS;FGFR3;MET;CD44;EZH2
Pyruvate metabolism	1947-02-01	0.913079	0.0394917	0.999995	0	0	0.486256	0.0442167	LDHA;PCK2
Butanoate metabolism	2023-01-28	0.913508	0.0392876	0.999995	0	0	0.405369	0.036671	ACADS
Phototransduction	2023-01-28	0.913508	0.0392876	0.999995	0	0	0.405369	0.036671	CALM2
Osteoclast differentiation	7/127	0.914756	0.0386945	0.999995	0	0	0.6375	0.0567996	IKBKB;CYLD;MAPK11;CSF1;STAT2;PIK3R2;NFKB2
Toxoplasmosis	6/112	0.915056	0.0385521	0.999995	0	0	0.618703	0.0549219	IKBKB;LAMA5;MAPK11;IRAK1;LAMB2;PPIF
Alcoholism	11/186	0.916733	0.0377571	0.999995	0	0	0.686512	0.0596847	HDAC5;HDAC10;GNB2;HDAC11;ARAF;BRAF;CALM2;HRAS;CAMKK1;HDAC6;HDAC7
Cortisol synthesis and secretion	1965-03-01	0.917355	0.0374626	0.999995	0	0	0.529216	0.0456506	PLCB3;ADCY3;ADCY6
Valine, leucine and isoleucine degradation	1948-02-01	0.918988	0.03669	0.999995	0	0	0.475659	0.0401845	IVD;ACADS
Serotonergic synapse	6/113	0.919057	0.0366577	0.999995	0	0	0.612887	0.0517322	PLCB3;DUSP1;GNB2;ARAF;BRAF;HRAS
Aldosterone synthesis and secretion	1998-05-01	0.92085	0.0358109	0.999995	0	0	0.587723	0.0484623	CAMK2B;PLCB3;ADCY3;CALM2;ADCY6
Diabetic cardiomyopathy	12/203	0.924762	0.0339698	0.999995	0	0	0.685993	0.0536573	COL1A1;CAMK2B;MAPK11;PLCB3;NDUFB10;NDUFA3;PRKCD;UQCRC1;PPIF;PIK3R2;COX6C;AGER
beta-Alanine metabolism	2023-01-30	0.927392	0.0327369	0.999995	0	0	0.377372	0.0284461	ACADS
Cholesterol metabolism	1950-02-01	0.929691	0.0316616	0.999995	0	0	0.45579	0.0332287	LRPAP1;SOAT1
Ovarian steroidogenesis	1951-02-01	0.934526	0.0294085	0.999995	0	0	0.446464	0.0302325	ADCY3;ADCY6
Retrograde endocannabinoid signaling	8/148	0.934966	0.0292042	0.999995	0	0	0.624178	0.041973	MAPK11;FAAH;PLCB3;NDUFB10;GNB2;NDUFA3;ADCY3;ADCY6
Huntington disease	19/306	0.935282	0.0290576	0.999995	0	0	0.722059	0.0483112	TBP;NDUFB10;NDUFA3;HTT;AP2A1;WIPI2;COX6C;PLCB3;KLC3;ACTR1B;KLC2;KIF5C;RB1CC1;UQCRC1;ATG2A;PPIF;ULK1;HAP1;POLR2I
Chagas disease	5/102	0.935825	0.0288055	0.999995	0	0	0.563364	0.0373663	IKBKB;MAPK11;PLCB3;IRAK1;PIK3R2
Kaposi sarcoma-associated herpesvirus infection	11/193	0.93667	0.0284134	0.999995	0	0	0.659853	0.0431704	IKBKB;MAPK11;MAP2K2;IRF3;STAT2;GNB2;PIK3R2;PLCG1;CALM2;HRAS;NFATC4
Adherens junction	1971-03-01	0.943228	0.0253835	0.999995	0	0	0.482362	0.0281929	LMO7;BAIAP2;MET
Phagosome	8/152	0.945733	0.0242313	0.999995	0	0	0.606707	0.033851	ATP6V1G1;ATP6V0B;M6PR;TCIRG1;ITGA5;THBS1;ATP6V0A1;THBS3
Pathogenic Escherichia coli infection	11/197	0.946099	0.0240636	0.999995	0	0	0.64552	0.0357674	IKBKB;CYFIP1;MAPK11;IRAK1;MYO10;ROCK2;WIPF2;ARPC1B;ARHGEF1;ARHGEF2;BAIAP2
Bile secretion	1990-04-01	0.949549	0.0224824	0.999995	0	0	0.508339	0.0263155	ADCY3;SLC4A2;ADCY6;SLC9A1
Thyroid hormone synthesis	1975-03-01	0.956059	0.0195152	0.999995	0	0	0.455464	0.0204665	PLCB3;ADCY3;ADCY6
Aldosterone-regulated sodium reabsorption	1937-01-01	0.960648	0.0174358	0.999995	0	0	0.303878	0.0121999	PIK3R2
Antigen processing and presentation	1978-03-01	0.963842	0.0159942	0.999995	0	0	0.437174	0.0161002	RFX5;PSME1;RFXANK
Mineral absorption	1960-02-01	0.965899	0.0150682	0.999995	0	0	0.376999	0.0130803	SLC31A1;CLCN2
Leukocyte transendothelial migration	5/114	0.966697	0.0147097	0.999995	0	0	0.501012	0.0169694	MAPK11;ROCK2;PTK2B;PIK3R2;PLCG1
Glycerolipid metabolism	1961-02-01	0.968318	0.0139819	0.999995	0	0	0.370589	0.011931	DGAT1;DGKQ
Glycine, serine and threonine metabolism	1940-01-01	0.969735	0.0133467	0.999995	0	0	0.280456	0.00861897	GAMT
Ferroptosis	1941-01-01	0.972272	0.0122122	0.999995	0	0	0.27343	0.00768876	MAP1LC3B
Inflammatory bowel disease	1965-02-01	0.976441	0.0103541	0.999995	0	0	0.346984	0.00827248	STAT6;IL12RB1
Protein digestion and absorption	4/103	0.976907	0.0101466	0.999995	0	0	0.441273	0.0103096	COL1A1;COL7A1;SLC1A5;SLC38A2
Proteasome	1946-01-01	0.982101	0.00784365	0.999995	0	0	0.242982	0.00438843	PSME1
Amphetamine addiction	1969-02-01	0.982531	0.00765388	0.999995	0	0	0.326197	0.0057488	CAMK2B;CALM2
Cocaine addiction	1949-01-01	0.986236	0.00601908	0.999995	0	0	0.227759	0.00315661	CDK5
Leishmaniasis	1977-02-01	0.990466	0.00416041	0.999995	0	0	0.291275	0.00279033	MAPK11;IRAK1
Chemical carcinogenesis	11/239	0.991756	0.00359515	0.999995	0	0	0.52539	0.00434925	JAG1;MAP2K2;RPS6KB1;GSTP1;RPS6KB2;ADCY3;PIK3R2;ARRB2;HRAS;ADCY6;CDC25A
Viral myocarditis	1960-01-01	0.994748	0.00228714	0.999995	0	0	0.185184	0.000975238	EIF4G1
Complement and coagulation cascades	1985-02-01	0.994841	0.00224646	0.999995	0	0	0.263085	0.00136085	F8;PLAU
Taste transduction	1986-02-01	0.995224	0.002079	0.999995	0	0	0.259938	0.00124434	PLCB3;ADCY6
Retinol metabolism	1968-01-01	0.997393	0.00113351	0.999995	0	0	0.163001	0.000425432	DGAT1
Prion disease	11/273	0.998529	0.000639348	0.999995	0	0	0.45635	0.000671817	MAPK11;KLC3;KLC2;NDUFB10;KIF5C;NDUFA3;PRKCD;UQCRC1;PPIF;PIK3R2;COX6C
Metabolism of xenobiotics by cytochrome P450	1976-01-01	0.998706	0.000562305	0.999995	0	0	0.14555	0.000188452	GSTP1
Viral protein interaction with cytokine and cytokine receptor	1/100	0.99984	6.9569e-05	0.999995	0	0	0.11012	1.764e-05	CSF1
Cytokine-cytokine receptor interaction	7/295	0.999992	3.52414e-06	0.999995	0	0	0.263174	2.13556e-06	CSF1;CLCF1;IL12RB1;CSF2RA;ACVR2B;IL17RA;CRLF2
Cell adhesion molecules	1/148	0.999994	2.53061e-06	0.999995	0	0	0.0739674	4.31004e-07	CNTNAP1
Herpes simplex virus 1 infection	15/498	0.999995	2.3534e-06	0.999995	0	0	0.334235	1.81119e-06	EIF2B5;STAT2;TSC2;PIK3R2;EIF2AK4;HCFC1;SRPK1;IKBKB;NXF1;IRAK1;IRF3;SRSF5;ITGA5;SRSF6;SRSF7
Olfactory transduction	5/440	0.999995	2.17799e-06	0.999995	0	0	0.123294	6.18323e-07	CAMK2B;GRK2;ADCY3;ARRB2;CALM2
Neuroactive ligand-receptor interaction	1/341	0.999995	2.01669e-06	0.999995	0	0	0.0316405	1.46926e-07	CHRNB1

## Sheet: SE
Term	Overlap	P-value		Adjusted P-value	Old P-value	Old Adjusted P-value	Odds Ratio	Combined Score	Genes
Shigellosis	24/246	0.000384887	3.41467	0.106229	0	0	2.29952	18.0801	CHUK;SRC;ACTN1;UBE2D3;IL18;ITPR2;ACTN4;WIPI2;PTK2;MALT1;CTTN;RPS6KB1;RRAGB;ATG16L1;AKT2;MDM2;RBCK1;IKBKG;ARHGEF2;ITGA5;TLN1;TLR5;MAP3K7;CD44
C-type lectin receptor signaling pathway	12/104	0.00272726	2.56427	0.376361	0	0	2.75625	16.2742	CASP8;PPP3CC;CHUK;KSR1;SYK;SRC;AKT2;MDM2;ITPR2;CALML4;IKBKG;MALT1
Spinocerebellar ataxia	14/143	0.00575319	2.24009	0.415854	0	0	2.29395	11.8322	NOP56;NFYA;ITPR2;WIPI2;PUM2;ATXN2L;PSMB7;ATXN2;PSMA3;ATXN1;PSMA4;PSMC6;KAT5;AKT2
Proteoglycans in cancer	18/205	0.00602687	2.21991	0.415854	0	0	2.03745	10.4145	CAMK2B;DDX5;WNT5B;SRC;FN1;PLAUR;ITPR2;FRS2;ANK3;PTK2;CTTN;RPS6KB1;AKT2;MDM2;SDC1;ITGA5;PPP1R12B;CD44
Axon guidance	16/182	0.00917277	2.0375	0.506337	0	0	2.03788	9.56075	EPHB6;CAMK2B;WNT5B;SRC;SEMA6D;UNC5C;SEMA3F;SSH2;PTK2;ENAH;PPP3CC;ABLIM2;PARD3;FYN;LRRC4C;PLXNA3
Adherens junction	1971-08-01	0.0151603	1.81929	0.692587	0	0	2.67553	11.208	TCF7L2;SRC;ACTN1;PARD3;CTNND1;FYN;ACTN4;MAP3K7
Non-homologous end-joining	2023-03-13	0.0191254	1.71839	0.692587	0	0	6.30363	24.9418	XRCC6;POLM;POLL
Yersinia infection	12/137	0.0227048	1.64388	0.692587	0	0	2.02508	7.66528	MAP2K4;IRAK1;CHUK;SRC;AKT2;FN1;IL18;IKBKG;ITGA5;ARHGEF7;MAP3K7;PTK2
Glucagon signaling pathway	10/107	0.0240722	1.61848	0.692587	0	0	2.17307	8.09839	CAMK2B;CRTC2;PPP3CC;AKT2;PGAM1;ITPR2;CALML4;PPP4R3B;SIRT1;PFKP
Fluid shear stress and atherosclerosis	12/139	0.0250937	1.60043	0.692587	0	0	1.99298	7.34439	PIAS4;MAP2K4;CHUK;SRC;AKT2;GSTP1;SDC1;CALML4;IKBKG;ARHGEF2;MAP3K7;PTK2
Hedgehog signaling pathway	1956-06-01	0.0412863	1.38419	0.916055	0	0	2.52451	8.04618	CSNK1G3;HHAT;EVC;SPOPL;CDON;CSNK1G1
Other glycan degradation	2023-03-18	0.0461226	1.33609	0.916055	0	0	4.20132	12.9252	GLB1;MAN2B2;MAN2C1
Protein processing in endoplasmic reticulum	13/171	0.0492336	1.30774	0.916055	0	0	1.73454	5.223	HSPA8;TRAM1;UBXN2A;PRKCSH;UBE2D3;RAD23A;UBE2G1;RNF5;NSFL1C;BAG1;UGGT2;SIL1;SEC31A
Glycosaminoglycan degradation	2023-03-19	0.0529737	1.27594	0.916055	0	0	3.93853	11.5713	GALNS;GLB1;GUSB
Transcriptional misregulation in cancer	14/192	0.0564605	1.24825	0.916055	0	0	1.65817	4.76595	DDX5;TAF15;KMT2A;MAX;PRCC;ASPSCR1;PTK2;PML;ETV6;NCOR1;ZEB1;MDM2;BMP2K;NUPR1
Proteasome	1946-05-01	0.0570502	1.24374	0.916055	0	0	2.56394	7.34266	PSMB7;PSMA3;PSMA4;PSMC6;PSMF1
Ribosome	12/158	0.0575798	1.23973	0.916055	0	0	1.73188	4.94379	MRPL4;RPS4X;RPL18A;RPS19;RPS5;RPL12;RPSA;RPL15;RPS2;MRPL10;RPS24;MRPL33
Fructose and mannose metabolism	1933-04-01	0.0614548	1.21144	0.916055	0	0	2.89853	8.08531	PFKFB2;GMPPA;ALDOA;PFKP
Lipid and atherosclerosis	15/215	0.0674094	1.17128	0.916055	0	0	1.58111	4.26421	CAMK2B;MAP2K4;HSPA8;CHUK;SRC;IL18;MIB2;CALML4;PTK2;PPP3CC;CASP8;IRAK1;AKT2;IKBKG;MAP3K7
Tuberculosis	13/180	0.0682895	1.16565	0.916055	0	0	1.64028	4.40251	CAMK2B;KSR1;SYK;NFYA;SRC;IL18;CALML4;MALT1;CASP8;PPP3CC;IRAK1;AKT2;ATP6V1H
Toxoplasmosis	9/112	0.0696999	1.15677	0.916055	0	0	1.83921	4.89885	HSPA8;LAMA5;CASP8;IRAK1;CHUK;AKT2;IKBKG;TYK2;MAP3K7
B cell receptor signaling pathway	1981-07-01	0.0757586	1.12057	0.918873	0	0	1.98973	5.13391	PPP3CC;CHUK;SYK;AKT2;INPPL1;IKBKG;MALT1
Acute myeloid leukemia	1967-06-01	0.0841301	1.07505	0.918873	0	0	2.06807	5.11929	TCF7L2;CHUK;RPS6KB1;AKT2;IKBKG;PML
Tight junction	12/169	0.0855512	1.06777	0.918873	0	0	1.6096	3.95743	MYL6;CTTN;SRC;ACTN1;PARD3;NEDD4;SYMPK;ACTN4;ARHGEF2;MPDZ;YBX3;LLGL2
AMPK signaling pathway	9/120	0.0971859	1.0124	0.918873	0	0	1.70594	3.97676	PFKFB2;CRTC2;RPS6KB1;CAB39L;AKT2;MAP3K7;SIRT1;PFKP;CAMKK2
Central carbon metabolism in cancer	1970-06-01	0.0989161	1.00473	0.918873	0	0	1.97082	4.55946	GLS2;AKT2;PGAM1;FGFR3;PFKP;PDK1
Epithelial cell signaling in Helicobacter pylori infection	1970-06-01	0.0989161	1.00473	0.918873	0	0	1.97082	4.55946	ATP6V1A;MAP2K4;CHUK;SRC;ATP6V1H;IKBKG
Thyroid hormone signaling pathway	9/121	0.101007	0.995647	0.918873	0	0	1.69062	3.87585	PFKFB2;NCOA1;MED1;KAT2B;NCOR1;SRC;AKT2;MDM2;PFKP
Toll-like receptor signaling pathway	8/104	0.10191	0.991785	0.918873	0	0	1.75277	4.00274	MAP2K4;CASP8;IRAK1;CHUK;AKT2;IKBKG;TLR5;MAP3K7
Measles	10/139	0.102869	0.987717	0.918873	0	0	1.63126	3.70999	HSPA8;CASP8;IRAK1;CHUK;AKT2;RACK1;IKBKG;TYK2;RCHY1;MAP3K7
ECM-receptor interaction	1988-07-01	0.106191	0.973911	0.918873	0	0	1.81711	4.07489	LAMA5;TNC;FN1;SDC1;ITGA5;NPNT;CD44
Ubiquitin mediated proteolysis	10/140	0.106536	0.972503	0.918873	0	0	1.61863	3.62455	PIAS4;FBXW7;UBE2Q2;NEDD4;UBE2D3;MDM2;UBE2G1;SAE1;RCHY1;PML
Coronavirus disease	15/232	0.109973	0.958713	0.919777	0	0	1.45593	3.214	SYK;CHUK;RPL12;RPS5;RPSA;TYK2;RPS4X;RPL18A;RPS19;IRAK1;IKBKG;RPL15;RPS2;MAP3K7;RPS24
Legionellosis	1957-05-01	0.117091	0.931477	0.950503	0	0	2.0204	4.33336	BCL2L13;HSPA8;CASP8;IL18;TLR5
Small cell lung cancer	1992-07-01	0.126127	0.899192	0.992882	0	0	1.73123	3.58446	LAMA5;CHUK;MAX;AKT2;FN1;IKBKG;PTK2
Focal adhesion	13/201	0.129622	0.887322	0.992882	0	0	1.45544	2.97366	LAMA5;SRC;ACTN1;FN1;TNC;ACTN4;ARHGAP5;PTK2;AKT2;FYN;ITGA5;TLN1;PPP1R12B
Epstein-Barr virus infection	13/202	0.133135	0.875707	0.992882	0	0	1.44766	2.91905	MAP2K4;SYK;CHUK;TYK2;PSMC6;CASP8;IRAK1;AKT2;NEDD4;MDM2;IKBKG;MAP3K7;CD44
Viral carcinogenesis	13/203	0.136701	0.864228	0.992882	0	0	1.43997	2.86547	HDAC4;GSN;HDAC10;SYK;SRC;ACTN1;MRPS18B;ACTN4;YWHAZ;KAT2B;CASP8;MDM2;IKBKG
Basal transcription factors	1945-04-01	0.147578	0.830978	0.999996	0	0	2.04889	3.92034	CDK7;TAF15;ERCC3;GTF2F2
Prostate cancer	1997-07-01	0.153486	0.81393	0.999996	0	0	1.63462	3.06352	TCF7L2;ZEB1;CHUK;AKT2;GSTP1;MDM2;IKBKG
Nucleotide excision repair	1947-04-01	0.165004	0.782506	0.999996	0	0	1.95339	3.51958	CDK7;RFC4;ERCC3;RAD23A
mTOR signaling pathway	10/154	0.165429	0.781388	0.999996	0	0	1.46018	2.62718	ATP6V1A;WNT5B;CHUK;RPS6KB1;RRAGB;CAB39L;AKT2;NPRL3;ATP6V1H;SLC38A9
GnRH secretion	1964-05-01	0.166198	0.779374	0.999996	0	0	1.78004	3.19441	GABBR1;AKT2;GPER1;ITPR2;CACNA1C
Kaposi sarcoma-associated herpesvirus infection	12/193	0.171391	0.766012	0.999996	0	0	1.3944	2.45946	MAP2K4;TCF7L2;PPP3CC;CASP8;SYK;CHUK;SRC;AKT2;ITPR2;CALML4;IKBKG;TYK2
Autophagy	9/137	0.173234	0.761366	0.999996	0	0	1.47804	2.59117	MTMR3;RPS6KB1;RRAGB;ATG16L1;AKT2;ATG9A;WIPI2;MAP3K7;CAMKK2
Amino sugar and nucleotide sugar metabolism	1948-04-01	0.173981	0.759499	0.999996	0	0	1.90889	3.33829	CYB5R1;GMPPA;UAP1;CYB5RL
Endocytosis	15/252	0.176786	0.752553	0.999996	0	0	1.33166	2.30752	HSPA8;IST1;SRC;VPS26A;AGAP3;EPS15L1;PML;EPN2;SNX4;PARD3;NEDD4;CAPZA2;MDM2;FGFR3;SNX6
Selenocompound metabolism	2023-02-17	0.179992	0.744747	0.999996	0	0	2.7978	4.79779	TXNRD1;SCLY
Long-term potentiation	1967-05-01	0.189382	0.722661	0.999996	0	0	1.69364	2.81819	CAMK2B;PPP3CC;ITPR2;CALML4;CACNA1C
ErbB signaling pathway	1985-06-01	0.190737	0.719566	0.999996	0	0	1.59536	2.64328	CAMK2B;MAP2K4;RPS6KB1;SRC;AKT2;PTK2
NF-kappa B signaling pathway	7/104	0.195895	0.707976	0.999996	0	0	1.5161	2.47151	PIAS4;IRAK1;CHUK;SYK;IKBKG;MAP3K7;MALT1
T cell receptor signaling pathway	7/104	0.195895	0.707976	0.999996	0	0	1.5161	2.47151	PPP3CC;CHUK;AKT2;FYN;IKBKG;MAP3K7;MALT1
Regulation of actin cytoskeleton	13/218	0.196188	0.707327	0.999996	0	0	1.33354	2.17192	GSN;SRC;ACTN1;FN1;ACTN4;SSH2;PTK2;ENAH;DIAPH2;ITGA5;ARHGEF7;PPP1R12B;FGFR3
Propanoate metabolism	1934-03-01	0.200592	0.697686	0.999996	0	0	2.03119	3.26307	SUCLA2;BCKDHB;ACOX3
Hepatitis B	10/162	0.204886	0.688487	0.999996	0	0	1.38275	2.19207	MAP2K4;CASP8;IRAK1;CHUK;SRC;AKT2;IKBKG;TYK2;MAP3K7;YWHAZ
Amphetamine addiction	1969-05-01	0.205443	0.687309	0.999996	0	0	1.64054	2.5963	CAMK2B;PPP3CC;CALML4;CACNA1C;SIRT1
D-Glutamine and D-glutamate metabolism	2023-01-05	0.207944	0.682053	0.999996	0	0	5.24313	8.23426	GLS2
PD-L1 expression and PD-1 checkpoint pathway in cancer	1989-06-01	0.219439	0.658686	0.999996	0	0	1.51815	2.30255	EML4;PPP3CC;CHUK;RPS6KB1;AKT2;IKBKG
Osteoclast differentiation	8/127	0.222619	0.652439	0.999996	0	0	1.41229	2.12167	PPP3CC;CHUK;SYK;AKT2;FYN;IKBKG;TYK2;MAP3K7
HIF-1 signaling pathway	7/109	0.228704	0.640726	0.999996	0	0	1.4414	2.12654	CAMK2B;EGLN1;RPS6KB1;AKT2;ALDOA;PFKP;PDK1
Lysosome	8/128	0.228786	0.64057	0.999996	0	0	1.40044	2.06561	GALC;GALNS;AP3M1;AP1G2;GLB1;PSAP;ATP6V1H;GUSB
Phosphonate and phosphinate metabolism	2023-01-06	0.244031	0.612554	0.999996	0	0	4.19429	5.91587	SELENOI
Parkinson disease	14/249	0.246402	0.608355	0.999996	0	0	1.25219	1.75406	CAMK2B;TRAP1;NDUFB5;NDUFA4;NDUFA3;ITPR2;UBE2G1;CALML4;KLC1;PSMB7;PSMA3;PSMA4;PSMC6;NDUFV2
Salmonella infection	14/249	0.246402	0.608355	0.999996	0	0	1.25219	1.75406	MAP2K4;TCF7L2;AHNAK;CHUK;IL18;GCC2;KLC1;CASP8;IRAK1;AKT2;PLEKHM2;IKBKG;TLR5;MAP3K7
GnRH signaling pathway	1993-06-01	0.24947	0.602982	0.999996	0	0	1.44805	2.01049	CAMK2B;MAP2K4;SRC;ITPR2;CALML4;CACNA1C
Human papillomavirus infection	18/331	0.252379	0.597946	0.999996	0	0	1.20915	1.66478	ATP6V1A;LAMA5;TCF7L2;WNT5B;CHUK;FN1;TNC;TYK2;PTK2;CASP8;RPS6KB1;AKT2;PARD3;MDM2;ATP6V1H;IKBKG;ITGA5;LLGL2
Human immunodeficiency virus 1 infection	12/212	0.260613	0.584004	0.999996	0	0	1.26067	1.69524	PPP3CC;CASP8;IRAK1;AP1G2;CHUK;RPS6KB1;AKT2;ITPR2;CALML4;IKBKG;MAP3K7;PTK2
Histidine metabolism	2023-02-22	0.264956	0.576827	0.999996	0	0	2.0978	2.78628	CARNMT1;AMDHD1
Oxytocin signaling pathway	9/154	0.269236	0.569867	0.999996	0	0	1.30359	1.71052	CAMK2B;MYL6;PPP3CC;SRC;ITPR2;CALML4;CACNA1C;PPP1R12B;CAMKK2
Bacterial invasion of epithelial cells	1977-05-01	0.273508	0.56303	0.999996	0	0	1.45764	1.88973	CTTN;SRC;FN1;ITGA5;PTK2
Phosphatidylinositol signaling system	1997-06-01	0.28057	0.551959	0.999996	0	0	1.38411	1.7591	IPPK;MTMR3;PIP4P1;INPPL1;ITPR2;CALML4
Notch signaling pathway	1959-04-01	0.281356	0.550744	0.999996	0	0	1.52623	1.93547	TLE3;KAT2B;TLE1;ATXN1
VEGF signaling pathway	1959-04-01	0.281356	0.550744	0.999996	0	0	1.52623	1.93547	PPP3CC;SRC;AKT2;PTK2
Bladder cancer	1941-03-01	0.286582	0.542751	0.999996	0	0	1.65642	2.07007	SRC;MDM2;FGFR3
Estrogen signaling pathway	8/137	0.286735	0.542519	0.999996	0	0	1.30212	1.6266	NCOA1;HSPA8;GABBR1;SRC;AKT2;GPER1;ITPR2;CALML4
Pathogenic Escherichia coli infection	11/197	0.28733	0.541619	0.999996	0	0	1.24213	1.54909	CASP8;CTTN;IRAK1;CHUK;SRC;IL18;FYN;IKBKG;ARHGEF2;TLR5;MAP3K7
Glycerophospholipid metabolism	1998-06-01	0.288481	0.539882	0.999996	0	0	1.36899	1.70182	PTDSS2;PLPP5;MBOAT2;TAZ;SELENOI;PISD
NOD-like receptor signaling pathway	10/181	0.311374	0.506717	0.999996	0	0	1.22788	1.43264	CASP8;CHUK;ATG16L1;NEK7;IL18;ITPR2;RBCK1;IKBKG;TYK2;MAP3K7
Porphyrin and chlorophyll metabolism	1943-03-01	0.311792	0.506135	0.999996	0	0	1.57343	1.8337	GUSB;CP;BLVRA
Chagas disease	6/102	0.320548	0.494107	0.999996	0	0	1.31167	1.49232	MAP2K4;CASP8;IRAK1;CHUK;AKT2;IKBKG
Cytosolic DNA-sensing pathway	1963-04-01	0.322799	0.491068	0.999996	0	0	1.42246	1.60841	CHUK;POLR3C;IL18;IKBKG
Lysine degradation	1963-04-01	0.322799	0.491068	0.999996	0	0	1.42246	1.60841	KMT2A;PLOD2;KMT5B;KMT5A
Human cytomegalovirus infection	12/225	0.329219	0.482515	0.999996	0	0	1.18291	1.31425	AKAP13;PPP3CC;CASP8;CHUK;RPS6KB1;SRC;AKT2;MDM2;ITPR2;CALML4;IKBKG;PTK2
Platelet activation	7/124	0.335838	0.47387	0.999996	0	0	1.25562	1.37004	STIM1;SYK;SRC;AKT2;ITPR2;FYN;TLN1
Wnt signaling pathway	9/166	0.344728	0.462523	0.999996	0	0	1.20319	1.28139	CAMK2B;TLE3;TCF7L2;TLE1;PPP3CC;ZNRF3;WNT5B;NOTUM;MAP3K7
Biosynthesis of unsaturated fatty acids	2023-02-27	0.350073	0.455842	0.999996	0	0	1.6778	1.76104	TECR;ACOX3
Prion disease	14/273	0.363178	0.43988	0.999996	0	0	1.13471	1.14931	HSPA8;NDUFB5;NDUFA4;NDUFA3;ITPR2;CACNA1C;KLC1;PSMB7;PSMA3;PPP3CC;PSMA4;PSMC6;FYN;NDUFV2
Ribosome biogenesis in eukaryotes	6/108	0.369471	0.432419	0.999996	0	0	1.23412	1.2288	NOP56;WDR36;NOP58;EIF6;RAN;REXO5
Sulfur metabolism	2023-01-10	0.372685	0.428658	0.999996	0	0	2.32967	2.29943	SQOR
Fc epsilon RI signaling pathway	1968-04-01	0.375072	0.425885	0.999996	0	0	1.31098	1.2856	MAP2K4;SYK;AKT2;FYN
Adipocytokine signaling pathway	1969-04-01	0.385511	0.413964	0.999996	0	0	1.29075	1.23032	CHUK;AKT2;IKBKG;CAMKK2
Renin secretion	1969-04-01	0.385511	0.413964	0.999996	0	0	1.29075	1.23032	PPP3CC;ITPR2;CALML4;CACNA1C
Sphingolipid metabolism	1949-03-01	0.38732	0.41193	0.999996	0	0	1.36777	1.29733	GALC;GLB1;PSAP
Dopaminergic synapse	7/132	0.39572	0.402612	0.999996	0	0	1.17476	1.08906	CAMK2B;PPP3CC;AKT2;ITPR2;CALML4;CACNA1C;COMT
RIG-I-like receptor signaling pathway	1970-04-01	0.395927	0.402385	0.999996	0	0	1.27112	1.17773	CASP8;CHUK;IKBKG;MAP3K7
Pentose phosphate pathway	1930-02-01	0.399592	0.398383	0.999996	0	0	1.4978	1.37395	ALDOA;PFKP
beta-Alanine metabolism	1930-02-01	0.399592	0.398383	0.999996	0	0	1.4978	1.37395	SMOX;ACOX3
Vibrio cholerae infection	1950-03-01	0.399761	0.3982	0.999996	0	0	1.3386	1.22735	ATP6V1A;ATP6V1H;KDELR3
Taurine and hypotaurine metabolism	2023-01-11	0.401274	0.396559	0.999996	0	0	2.09659	1.91442	CSAD
TNF signaling pathway	6/112	0.402276	0.395476	0.999996	0	0	1.1873	1.08118	MAP2K4;CASP8;CHUK;AKT2;IKBKG;MAP3K7
Pathways of neurodegeneration	23/475	0.41166	0.385461	0.999996	0	0	1.06795	0.947869	CAMK2B;TRAP1;WNT5B;NDUFB5;NDUFA4;NDUFA3;ITPR2;UBE2G1;WIPI2;CALML4;CACNA1C;KLC1;ATXN2L;PSMB7;PSMA3;ATXN2;PSMA4;PSMC6;ATXN1;PPP3CC;CASP8;NDUFV2;SPG11
Human T-cell leukemia virus 1 infection	11/219	0.413741	0.383271	0.999996	0	0	1.10946	0.979115	KAT2B;MAP2K4;CRTC2;PPP3CC;RANBP3;KAT5;CHUK;AKT2;IKBKG;TLN1;RAN
Galactose metabolism	1931-02-01	0.415711	0.381209	0.999996	0	0	1.44608	1.26932	GLB1;PFKP
Alzheimer disease	18/369	0.416816	0.380056	0.999996	0	0	1.07606	0.941673	WNT5B;CHUK;NDUFB5;NDUFA4;NDUFA3;ITPR2;CALML4;CACNA1C;WIPI2;KLC1;PSMB7;PSMA3;PPP3CC;PSMA4;PSMC6;CASP8;AKT2;NDUFV2
Leukocyte transendothelial migration	6/114	0.418648	0.37815	0.999996	0	0	1.16519	1.01456	ACTN1;CTNND1;ACTN4;ARHGAP5;PTK2;SIPA1
p53 signaling pathway	1973-04-01	0.426978	0.369594	0.999996	0	0	1.21567	1.03456	CASP8;MDM2;MDM4;RCHY1
SNARE interactions in vesicular transport	1933-02-01	0.447272	0.349429	0.999996	0	0	1.35264	1.08832	STX16;USE1
Glioma	1975-04-01	0.447452	0.349254	0.999996	0	0	1.1813	0.949984	CAMK2B;AKT2;MDM2;CALML4
Fanconi anemia pathway	1954-03-01	0.448716	0.348029	0.999996	0	0	1.23335	0.988365	POLN;REV1;FANCA
Fc gamma R-mediated phagocytosis	1997-05-01	0.454364	0.342596	0.999996	0	0	1.13956	0.898954	GSN;SYK;RPS6KB1;AKT2;INPPL1
Chronic myeloid leukemia	1976-04-01	0.457603	0.339511	0.999996	0	0	1.16483	0.910609	CHUK;AKT2;MDM2;IKBKG
Pancreatic cancer	1976-04-01	0.457603	0.339511	0.999996	0	0	1.16483	0.910609	CHUK;RPS6KB1;AKT2;IKBKG
Pyrimidine metabolism	1956-03-01	0.472587	0.325518	0.999996	0	0	1.18668	0.889459	DCTD;UCK2;UCKL1
Rap1 signaling pathway	10/210	0.48874	0.310922	0.999996	0	0	1.04822	0.750449	ENAH;SIPA1L1;SRC;AKT2;PARD3;CTNND1;CALML4;TLN1;FGFR3;SIPA1
Amyotrophic lateral sclerosis	17/364	0.493223	0.306956	0.999996	0	0	1.02706	0.725922	NDUFB5;NDUFA4;NDUFA3;WIPI2;KLC1;ATXN2L;PSMB7;PSMA3;ATXN2;PPP3CC;PSMA4;PSMC6;NUP210L;HNRNPA2B1;NDUFV2;HNRNPA1;SPG11
Amoebiasis	5/102	0.498483	0.30235	0.999996	0	0	1.08054	0.752257	LAMA5;ACTN1;FN1;ACTN4;PTK2
Longevity regulating pathway	5/102	0.498483	0.30235	0.999996	0	0	1.08054	0.752257	HSPA8;RPS6KB1;AKT2;SIRT1;CAMKK2
Cell cycle	6/124	0.49917	0.301751	0.999996	0	0	1.06589	0.740586	CDK7;STAG1;TFDP1;MDM2;YWHAZ;CDC14B
Hepatocellular carcinoma	8/168	0.500142	0.300907	0.999996	0	0	1.04812	0.726203	TCF7L2;SMARCC2;WNT5B;RPS6KB1;AKT2;GSTP1;TXNRD1;SMARCA2
Thiamine metabolism	2023-01-15	0.503191	0.298267	0.999996	0	0	1.49725	1.02829	TPK1
Viral myocarditis	1960-03-01	0.518832	0.284973	0.999996	0	0	1.10318	0.723876	CASP8;FYN;EIF4G1
Spliceosome	7/150	0.528467	0.276982	0.999996	0	0	1.02591	0.654302	TCERG1;HSPA8;DDX5;PRPF38B;PRPF40A;TXNL4A;HNRNPA1
PI3K-Akt signaling pathway	16/354	0.549138	0.260319	0.999996	0	0	0.991756	0.594464	LAMA5;CRTC2;SYK;CHUK;PKN3;FN1;TNC;YWHAZ;PTK2;RPS6KB1;IL7;AKT2;MDM2;IKBKG;ITGA5;FGFR3
MicroRNAs in cancer	14/310	0.551923	0.258121	0.999996	0	0	0.990923	0.588952	HDAC4;ABCC1;GLS2;TPM1;TNC;KIF23;SIRT1;FOXP1;ZEB1;MDM2;MDM4;ITGA5;FGFR3;CD44
Insulin secretion	1986-04-01	0.55486	0.255817	0.999996	0	0	1.02224	0.602139	RIMS2;CAMK2B;CACNA1C;TRPM4
Taste transduction	1986-04-01	0.55486	0.255817	0.999996	0	0	1.02224	0.602139	GABBR1;P2RX3;CACNA1C;SCN3A
Cardiac muscle contraction	1987-04-01	0.564074	0.248664	0.999996	0	0	1.00987	0.57822	ASPH;TNNT2;TPM1;CACNA1C
Oxidative phosphorylation	6/133	0.568097	0.245578	0.999996	0	0	0.989881	0.559741	ATP6V1A;NDUFB5;NDUFA4;NDUFA3;ATP6V1H;NDUFV2
GABAergic synapse	1989-04-01	0.582184	0.23494	0.999996	0	0	0.986004	0.533397	GABBR1;GLS2;SRC;CACNA1C
MAPK signaling pathway	13/294	0.58378	0.233751	0.999996	0	0	0.968954	0.521521	MAP2K4;HSPA8;CHUK;MAX;CACNA1C;MAPK8IP3;PPP3CC;IRAK1;AKT2;TAOK2;IKBKG;MAP3K7;FGFR3
Cholinergic synapse	5/113	0.590038	0.22912	0.999996	0	0	0.969923	0.511701	CAMK2B;AKT2;ITPR2;FYN;CACNA1C
Hypertrophic cardiomyopathy	1990-04-01	0.591074	0.228358	0.999996	0	0	0.974488	0.512399	TNNT2;TPM1;ITGA5;CACNA1C
Glycolysis / Gluconeogenesis	1967-03-01	0.594109	0.226134	0.999996	0	0	0.982155	0.511401	PGAM1;ALDOA;PFKP
Morphine addiction	1991-04-01	0.599852	0.221956	0.999996	0	0	0.963236	0.492283	GABBR1;PDE10A;PDE4D;PDE7A
Mitophagy	1968-03-01	0.604218	0.218806	0.999996	0	0	0.966994	0.487191	BCL2L13;SRC;ATG9A
One carbon pool by folate	2023-01-20	0.60657	0.217119	0.999996	0	0	1.10295	0.551403	MTHFD2L
Th1 and Th2 cell differentiation	1992-04-01	0.608516	0.215728	0.999996	0	0	0.95224	0.473008	PPP3CC;CHUK;IKBKG;TYK2
ABC transporters	1945-02-01	0.614054	0.211793	0.999996	0	0	0.974544	0.475258	ABCC1;ABCC5
Glycosphingolipid biosynthesis	1945-02-01	0.614054	0.211793	0.999996	0	0	0.974544	0.475258	GLB1;ST6GALNAC6
Renal cell carcinoma	1969-03-01	0.61416	0.211719	0.999996	0	0	0.952293	0.464243	EGLN1;AKT2;PRCC
Thermogenesis	10/232	0.61612	0.210335	0.999996	0	0	0.943246	0.456827	COX19;SMARCC2;RPS6KB1;NDUFB5;NDUFA4;COX18;NDUFA3;FRS2;NDUFV2;SMARCA2
Pantothenate and CoA biosynthesis	2023-01-21	0.624509	0.204462	0.999996	0	0	1.04775	0.493269	COASY
IL-17 signaling pathway	1994-04-01	0.625494	0.203777	0.999996	0	0	0.930981	0.436829	CASP8;CHUK;IKBKG;MAP3K7
Growth hormone synthesis, secretion and action	5/119	0.6359	0.196611	0.999996	0	0	0.918584	0.415855	MAP2K4;AKT2;ITPR2;CACNA1C;PTK2
Neurotrophin signaling pathway	5/119	0.6359	0.196611	0.999996	0	0	0.918584	0.415855	CAMK2B;IRAK1;AKT2;FRS2;CALML4
Arginine biosynthesis	2023-01-22	0.64163	0.192715	0.999996	0	0	0.997802	0.442768	GLS2
Dilated cardiomyopathy	1996-04-01	0.641997	0.192467	0.999996	0	0	0.910647	0.403573	TNNT2;TPM1;ITGA5;CACNA1C
Inositol phosphate metabolism	1973-03-01	0.652217	0.185608	0.999996	0	0	0.897687	0.383652	IPPK;MTMR3;INPPL1
Mannose type O-glycan biosynthesis	2023-01-23	0.657972	0.181793	0.999996	0	0	0.952398	0.398667	POMGNT2
Mismatch repair	2023-01-23	0.657972	0.181793	0.999996	0	0	0.952398	0.398667	RFC4
Proximal tubule bicarbonate reclamation	2023-01-23	0.657972	0.181793	0.999996	0	0	0.952398	0.398667	GLS2
Aldosterone synthesis and secretion	1998-04-01	0.658015	0.181764	0.999996	0	0	0.891177	0.372982	CAMK2B;ITPR2;CALML4;CACNA1C
Inflammatory mediator regulation of TRP channels	1998-04-01	0.658015	0.181764	0.999996	0	0	0.891177	0.372982	CAMK2B;SRC;ITPR2;CALML4
mRNA surveillance pathway	1998-04-01	0.658015	0.181764	0.999996	0	0	0.891177	0.372982	CPSF6;CPSF3;SYMPK;SRRM1
Arginine and proline metabolism	1950-02-01	0.671234	0.173126	0.999996	0	0	0.8728	0.347931	P4HA1;SMOX
Malaria	1950-02-01	0.671234	0.173126	0.999996	0	0	0.8728	0.347931	IL18;SDC1
N-Glycan biosynthesis	1950-02-01	0.671234	0.173126	0.999996	0	0	0.8728	0.347931	ALG6;MGAT4B
Retrograde endocannabinoid signaling	6/148	0.671506	0.17295	0.999996	0	0	0.884616	0.352283	NDUFB5;NDUFA4;NDUFA3;ITPR2;CACNA1C;NDUFV2
Influenza A	7/172	0.672459	0.172334	0.999996	0	0	0.888093	0.352408	CASP8;CHUK;AKT2;IL18;IKBKG;TYK2;PML
Vitamin digestion and absorption	2023-01-24	0.673569	0.171618	0.999996	0	0	0.910941	0.359972	ABCC1
Gastric acid secretion	1976-03-01	0.678948	0.168163	0.999996	0	0	0.86066	0.333257	CAMK2B;ITPR2;CALML4
Pertussis	1976-03-01	0.678948	0.168163	0.999996	0	0	0.86066	0.333257	IRAK1;CALML4;ITGA5
Melanogenesis	4/101	0.681122	0.166775	0.999996	0	0	0.863479	0.331588	CAMK2B;TCF7L2;WNT5B;CALML4
Adrenergic signaling in cardiomyocytes	6/150	0.684029	0.164926	0.999996	0	0	0.872238	0.331237	CAMK2B;AKT2;TNNT2;TPM1;CALML4;CACNA1C
Arrhythmogenic right ventricular cardiomyopathy	1977-03-01	0.687513	0.162719	0.999996	0	0	0.848985	0.318093	TCF7L2;ITGA5;CACNA1C
alpha-Linolenic acid metabolism	2023-01-25	0.688456	0.162124	0.999996	0	0	0.87294	0.325872	ACOX3
Folate biosynthesis	2023-01-26	0.702664	0.153252	0.999996	0	0	0.837978	0.295702	MOCS1
RNA degradation	1979-03-01	0.704125	0.15235	0.999996	0	0	0.826556	0.289955	CNOT2;PATL1;PFKP
Oocyte meiosis	5/129	0.704932	0.151853	0.999996	0	0	0.844059	0.295129	CAMK2B;PPP3CC;ITPR2;CALML4;YWHAZ
Pathways in cancer	22/531	0.707436	0.150313	0.999996	0	0	0.903335	0.312652	EGLN1;NCOA1;CAMK2B;LAMA5;TCF7L2;CHUK;WNT5B;MAX;GSTP1;TXNRD1;FN1;CALML4;PML;PTK2;EML4;CASP8;RPS6KB1;IL7;AKT2;MDM2;IKBKG;FGFR3
Cushing syndrome	6/155	0.713951	0.146332	0.999996	0	0	0.842745	0.283956	CAMK2B;TCF7L2;WNT5B;KMT2A;ITPR2;CACNA1C
Non-alcoholic fatty liver disease	6/155	0.713951	0.146332	0.999996	0	0	0.842745	0.283956	CASP8;NDUFB5;NDUFA4;AKT2;NDUFA3;NDUFV2
Collecting duct acid secretion	2023-01-27	0.716226	0.14495	0.999996	0	0	0.805706	0.268912	ATP6V1A
Fatty acid elongation	2023-01-27	0.716226	0.14495	0.999996	0	0	0.805706	0.268912	TECR
Cellular senescence	6/156	0.719695	0.142852	0.999996	0	0	0.837083	0.27534	PPP3CC;AKT2;MDM2;ITPR2;CALML4;SIRT1
Th17 cell differentiation	4/107	0.723987	0.140269	0.999996	0	0	0.812922	0.262559	PPP3CC;CHUK;IKBKG;TYK2
Hepatitis C	6/157	0.725358	0.139447	0.999996	0	0	0.831495	0.266984	CASP8;CHUK;AKT2;IKBKG;TYK2;YWHAZ
Phototransduction	2023-01-28	0.729169	0.137172	0.999996	0	0	0.775824	0.245044	CALML4
Vascular smooth muscle contraction	5/133	0.729839	0.136773	0.999996	0	0	0.81751	0.25746	MYL6;ITPR2;CALML4;CACNA1C;PPP1R12B
Drug metabolism	4/108	0.730698	0.136262	0.999996	0	0	0.805063	0.252593	UCK2;GSTP1;GUSB;UCKL1
Endometrial cancer	1958-02-01	0.748213	0.125975	0.999996	0	0	0.7478	0.216913	TCF7L2;AKT2
Apelin signaling pathway	5/137	0.75319	0.123096	0.999996	0	0	0.79257	0.224645	HDAC4;RPS6KB1;AKT2;ITPR2;CALML4
Ascorbate and aldarate metabolism	2023-01-30	0.753313	0.123024	0.999996	0	0	0.722243	0.204593	GUSB
Citrate cycle (TCA cycle)	2023-01-30	0.753313	0.123024	0.999996	0	0	0.722243	0.204593	SUCLA2
Colorectal cancer	1986-03-01	0.756948	0.120934	0.999996	0	0	0.756568	0.210675	TCF7L2;RPS6KB1;AKT2
Neutrophil extracellular trap formation	7/189	0.762785	0.117598	0.999996	0	0	0.804416	0.21782	HDAC4;CLCN5;HDAC10;SYK;SRC;AKT2;MAP3K7
RNA polymerase	2023-01-31	0.764567	0.116585	0.999996	0	0	0.698132	0.187411	POLR3C
Glutamatergic synapse	4/114	0.768401	0.114412	0.999996	0	0	0.76091	0.200457	PPP3CC;GLS2;ITPR2;CACNA1C
Calcium signaling pathway	9/240	0.769689	0.113685	0.999996	0	0	0.814554	0.213225	CAMK2B;PPP3CC;STIM1;ASPH;P2RX3;ITPR2;CALML4;CACNA1C;FGFR3
cAMP signaling pathway	8/216	0.772595	0.112048	0.999996	0	0	0.8042	0.207483	CAMK2B;GABBR1;PDE10A;AKT2;PDE4D;CALML4;CACNA1C;ACOX3
Glycerolipid metabolism	1961-02-01	0.77282	0.111921	0.999996	0	0	0.709664	0.182887	PLPP5;MBOAT2
Chemokine signaling pathway	7/192	0.776673	0.109762	0.999996	0	0	0.791246	0.199976	CCL25;CHUK;SRC;AKT2;PARD3;IKBKG;PTK2
Apoptosis	5/142	0.780217	0.107784	0.999996	0	0	0.763442	0.189473	CASP8;CHUK;AKT2;ITPR2;IKBKG
Base excision repair	1933-01-01	0.785558	0.104822	0.999996	0	0	0.65443	0.157954	POLL
Basal cell carcinoma	1963-02-01	0.788036	0.103454	0.999996	0	0	0.686324	0.16349	TCF7L2;WNT5B
Pentose and glucuronate interconversions	1934-01-01	0.795342	0.099446	0.999996	0	0	0.634565	0.145305	GUSB
Rheumatoid arthritis	1993-03-01	0.801888	0.0958862	0.999996	0	0	0.697467	0.153991	ATP6V1A;IL18;ATP6V1H
Cortisol synthesis and secretion	1965-02-01	0.802347	0.0956379	0.999996	0	0	0.664466	0.146325	ITPR2;CACNA1C
Inflammatory bowel disease	1965-02-01	0.802347	0.0956379	0.999996	0	0	0.664466	0.146325	IL18;TLR5
Nicotinate and nicotinamide metabolism	1935-01-01	0.80468	0.0943767	0.999996	0	0	0.615869	0.133835	SIRT1
Breast cancer	5/147	0.804905	0.0942554	0.999996	0	0	0.736366	0.159814	NCOA1;TCF7L2;WNT5B;RPS6KB1;AKT2
Aminoacyl-tRNA biosynthesis	1966-02-01	0.809175	0.0919574	0.999996	0	0	0.65405	0.138488	TARS2;WARS2
DNA replication	1936-01-01	0.813592	0.0895931	0.999996	0	0	0.598242	0.123415	RFC4
Tyrosine metabolism	1936-01-01	0.813592	0.0895931	0.999996	0	0	0.598242	0.123415	COMT
African trypanosomiasis	1937-01-01	0.822099	0.0850761	0.999996	0	0	0.581593	0.113931	IL18
Alanine, aspartate and glutamate metabolism	1937-01-01	0.822099	0.0850761	0.999996	0	0	0.581593	0.113931	GLS2
Thyroid cancer	1937-01-01	0.822099	0.0850761	0.999996	0	0	0.581593	0.113931	TCF7L2
Circadian entrainment	1997-03-01	0.82429	0.0839197	0.999996	0	0	0.667647	0.129011	CAMK2B;CALML4;CACNA1C
Huntington disease	11/306	0.828387	0.0817668	0.999996	0	0	0.778659	0.146602	PSMB7;PSMA3;PSMA4;PSMC6;CASP8;NDUFB5;NDUFA4;NDUFA3;WIPI2;KLC1;NDUFV2
Primary immunodeficiency	1938-01-01	0.830217	0.0808084	0.999996	0	0	0.565845	0.105286	IKBKG
Prolactin signaling pathway	1970-02-01	0.834428	0.0786109	0.999996	0	0	0.615447	0.111401	SRC;AKT2
Hematopoietic cell lineage	1999-03-01	0.834657	0.078492	0.999996	0	0	0.653669	0.118141	IL7;ITGA5;CD44
Various types of N-glycan biosynthesis	1939-01-01	0.837965	0.076774	0.999996	0	0	0.550925	0.0973919	MGAT4B
Glycine, serine and threonine metabolism	1940-01-01	0.84536	0.0729582	0.999996	0	0	0.536771	0.0901735	PGAM1
Melanoma	1972-02-01	0.845888	0.0726869	0.999996	0	0	0.5978	0.100052	AKT2;MDM2
Non-small cell lung cancer	1972-02-01	0.845888	0.0726869	0.999996	0	0	0.5978	0.100052	EML4;AKT2
Ferroptosis	1941-01-01	0.852418	0.0693473	0.999996	0	0	0.523324	0.0835634	CP
Homologous recombination	1941-01-01	0.852418	0.0693473	0.999996	0	0	0.523324	0.0835634	BARD1
FoxO signaling pathway	4/131	0.852917	0.0690931	0.999996	0	0	0.658466	0.104757	CHUK;AKT2;MDM2;SIRT1
Alcoholism	6/186	0.85563	0.0677142	0.999996	0	0	0.696464	0.108591	HDAC4;HDAC10;CALML4;SLC29A1;SLC29A3;CAMKK2
Fatty acid degradation	1943-01-01	0.865583	0.0626912	0.999996	0	0	0.498352	0.071938	ACOX3
Parathyroid hormone synthesis, secretion and action	3/106	0.866886	0.0620379	0.999996	0	0	0.60902	0.0869971	AKAP13;PDE4D;ITPR2
Hippo signaling pathway	5/163	0.869351	0.0608047	0.999996	0	0	0.661239	0.0925787	TCF7L2;WNT5B;PARD3;YWHAZ;LLGL2
Leishmaniasis	1977-02-01	0.871448	0.0597587	0.999996	0	0	0.5578	0.076753	IRAK1;MAP3K7
Insulin resistance	3/108	0.875017	0.0579835	0.999996	0	0	0.597357	0.0797542	CRTC2;RPS6KB1;AKT2
Insulin signaling pathway	4/137	0.875745	0.0576223	0.999996	0	0	0.628561	0.0833977	RPS6KB1;AKT2;INPPL1;CALML4
Antigen processing and presentation	1978-02-01	0.876067	0.0574626	0.999996	0	0	0.550431	0.0728289	HSPA8;NFYA
Synaptic vesicle cycle	1978-02-01	0.876067	0.0574626	0.999996	0	0	0.550431	0.0728289	ATP6V1A;ATP6V1H
cGMP-PKG signaling pathway	5/167	0.882325	0.0543712	0.999996	0	0	0.644776	0.0807222	PPP3CC;AKT2;ITPR2;CALML4;CACNA1C
Type II diabetes mellitus	1946-01-01	0.883164	0.0539587	0.999996	0	0	0.465055	0.0577805	CACNA1C
Carbohydrate digestion and absorption	1947-01-01	0.888498	0.0513436	0.999996	0	0	0.454921	0.0537821	AKT2
Peroxisome	1982-02-01	0.893054	0.0491225	0.999996	0	0	0.5228	0.0591332	ACOX3;PEX26
Intestinal immune network for IgA production	1948-01-01	0.893589	0.0488623	0.999996	0	0	0.445219	0.0500914	CCL25
Valine, leucine and isoleucine degradation	1948-01-01	0.893589	0.0488623	0.999996	0	0	0.445219	0.0500914	BCKDHB
Signaling pathways regulating pluripotency of stem cells	4/143	0.895443	0.047962	0.999996	0	0	0.601239	0.0663988	RIF1;WNT5B;AKT2;FGFR3
Ether lipid metabolism	1949-01-01	0.898447	0.0465074	0.999996	0	0	0.43592	0.0466815	SELENOI
Diabetic cardiomyopathy	6/203	0.904934	0.0433833	0.999996	0	0	0.635791	0.0635116	CAMK2B;NDUFB5;NDUFA4;AKT2;NDUFA3;NDUFV2
Cell adhesion molecules	4/148	0.909707	0.0410985	0.999996	0	0	0.580209	0.0549068	CNTNAP1;SDC1;LRRC4C;CD276
Sphingolipid signaling pathway	3/119	0.912319	0.0398534	0.999996	0	0	0.540398	0.04959	ABCC1;AKT2;FYN
Gastric cancer	4/149	0.912343	0.0398418	0.999996	0	0	0.576178	0.052858	TCF7L2;WNT5B;RPS6KB1;AKT2
Gap junction	1988-02-01	0.914515	0.0388093	0.999996	0	0	0.486172	0.0434452	SRC;ITPR2
Glycosaminoglycan biosynthesis	1953-01-01	0.915764	0.0382162	0.999996	0	0	0.402303	0.0354012	CHST15
Regulation of lipolysis in adipocytes	1955-01-01	0.923283	0.0346652	0.999996	0	0	0.387363	0.0309191	AKT2
Salivary secretion	1993-02-01	0.92924	0.0318721	0.999996	0	0	0.459338	0.03371	ITPR2;CALML4
RNA transport	5/186	0.929899	0.0315643	0.999996	0	0	0.576513	0.0419006	NUP210L;THOC7;RAN;SRRM1;EIF4G1
Glutathione metabolism	1957-01-01	0.930131	0.0314558	0.999996	0	0	0.373489	0.0270517	GSTP1
TGF-beta signaling pathway	1994-02-01	0.931882	0.0306391	0.999996	0	0	0.454322	0.0320519	TFDP1;RPS6KB1
Necroptosis	4/159	0.935157	0.0291156	0.999996	0	0	0.53872	0.0361164	CAMK2B;CASP8;RBCK1;TYK2
Purine metabolism	3/129	0.937129	0.0282008	0.999996	0	0	0.497247	0.0322885	PDE10A;PDE4D;PDE7A
Relaxin signaling pathway	3/129	0.937129	0.0282008	0.999996	0	0	0.497247	0.0322885	MAP2K4;SRC;AKT2
Long-term depression	1960-01-01	0.939275	0.027207	0.999996	0	0	0.354442	0.0222046	ITPR2
Mineral absorption	1960-01-01	0.939275	0.027207	0.999996	0	0	0.354442	0.0222046	CLCN2
JAK-STAT signaling pathway	4/162	0.940867	0.0264719	0.999996	0	0	0.528408	0.0322084	PIAS4;IL7;AKT2;TYK2
Natural killer cell mediated cytotoxicity	3/131	0.941238	0.0263005	0.999996	0	0	0.489426	0.0296392	PPP3CC;SYK;FYN
Choline metabolism in cancer	1998-02-01	0.941545	0.026159	0.999996	0	0	0.4353	0.0262195	RPS6KB1;AKT2
Arachidonic acid metabolism	1961-01-01	0.94205	0.0259262	0.999996	0	0	0.348516	0.0208055	PTGES3
Steroid hormone biosynthesis	1961-01-01	0.94205	0.0259262	0.999996	0	0	0.348516	0.0208055	COMT
AGE-RAGE signaling pathway in diabetic complications	2/100	0.945873	0.024167	0.999996	0	0	0.426371	0.0237261	AKT2;FN1
Viral protein interaction with cytokine and cytokine receptor	2/100	0.945873	0.024167	0.999996	0	0	0.426371	0.0237261	CCL25;IL18
Protein digestion and absorption	2/103	0.951798	0.0214552	0.999996	0	0	0.413641	0.0204348	COL28A1;COL18A1
Ras signaling pathway	6/232	0.956012	0.0195366	0.999996	0	0	0.553356	0.0248925	CHUK;KSR1;AKT2;CALML4;IKBKG;FGFR3
Chemical carcinogenesis	6/239	0.96383	0.0159995	0.999996	0	0	0.536533	0.019766	RPS6KB1;SRC;AKT2;GSTP1;PTGES3;CACNA1C
Phospholipase D signaling pathway	3/148	0.967343	0.0144193	0.999996	0	0	0.431657	0.0143318	SYK;AKT2;FYN
Serotonergic synapse	2/113	0.967386	0.0144002	0.999996	0	0	0.376178	0.0124732	ITPR2;CACNA1C
PPAR signaling pathway	1974-01-01	0.968453	0.0139214	0.999996	0	0	0.286256	0.00917598	ACOX3
Thyroid hormone synthesis	1975-01-01	0.969895	0.0132751	0.999996	0	0	0.282373	0.00863132	ITPR2
Metabolism of xenobiotics by cytochrome P450	1976-01-01	0.971272	0.0126593	0.999996	0	0	0.278593	0.00812073	GSTP1
Phagosome	3/152	0.971646	0.0124918	0.999996	0	0	0.41998	0.0120801	ATP6V1A;ATP6V1H;ITGA5
Complement and coagulation cascades	1985-01-01	0.981148	0.00826549	0.999996	0	0	0.248626	0.00473185	PLAUR
Systemic lupus erythematosus	2/135	0.986457	0.005922	0.999996	0	0	0.313589	0.00427608	ACTN1;ACTN4
Progesterone-mediated oocyte maturation	1/100	0.990661	0.00407472	0.999996	0	0	0.210789	0.00197771	AKT2
Pancreatic secretion	1/102	0.991497	0.00370872	0.999996	0	0	0.206593	0.00176423	ITPR2
Herpes simplex virus 1 infection	11/498	0.998185	0.000788996	0.999996	0	0	0.466854	0.000848147	CASP8;CHUK;SYK;IRAK1;SRC;AKT2;IKBKG;ITGA5;TYK2;MAP3K7;PML
Cytokine-cytokine receptor interaction	3/295	0.999884	5.03444e-05	0.999996	0	0	0.212687	2.46552e-05	CCL25;IL7;IL18
Neuroactive ligand-receptor interaction	4/341	0.999898	4.41929e-05	0.999996	0	0	0.245398	2.49711e-05	GABBR1;P2RX3;PARD3;P2RY14
Olfactory transduction	2/440	0.999996	1.8298e-06	0.999996	0	0	0.0936902	3.94742e-07	CAMK2B;CALML4
