# Supplementary material for: The context-dependent epigenetic and organogenesis programs determine 3D vs. 2D cellular fitness of MYC-driven murine liver cancer cells
Source: eLife. 2025 May 6;14:RP101299. doi: 10.7554/eLife.101299 (PMC12055005; doi:10.7554/eLife.101299)
Supplement: Supplementary file 7. [file elife-101299-supp7.xlsx]

## Sheet: A3SS
Term	Overlap	P-value		Adjusted P-value	Old P-value	Old Adjusted P-value	Odds Ratio	Combined Score	Genes
RNA degradation	13/79	0.000134222	3.87217	0.0375823	0	0	3.79067	33.7976	HSPA9;TTC37;CNOT10;ENO1;ENO2;EDC4;PAN2;C1D;XRN2;EXOSC8;CNOT3;DCP1A;MPHOSPH6
Spinocerebellar ataxia	15/143	0.00520124	2.28389	0.392098	0	0	2.25246	11.8454	NFYA;PIK3R2;VLDLR;ATG14;PUM1;MTOR;PUM2;ATXN2L;PSMA6;PSMA3;ATXN1L;VDAC2;ULK1;CIC;ATG2B
RNA transport	18/186	0.00552053	2.25802	0.392098	0	0	2.06132	10.7174	EIF4A2;NDC1;EIF2B4;NUP205;NUP210;POP1;PHAX;SENP2;THOC7;XPOT;EIF3I;XPO5;TACC3;NUP88;GEMIN8;TARDBP;EIF4G1;NUP37
Ribosome	16/158	0.0056014	2.2517	0.392098	0	0	2.16634	11.2319	RPL3;RPL10;RPL12;RPLP0;MRPS10;MRPS18C;MRPL30;RPS4X;RPS19;RPL27A;RPL38;RPS2;RPL39;RPL28;RPS21;RPL19
Nicotinate and nicotinamide metabolism	1935-06-01	0.00709284	2.14918	0.397199	0	0	3.96131	19.6032	NT5C;NADK2;SIRT4;ENPP1;NMNAT3;NT5C2
Vibrio cholerae infection	1950-07-01	0.011501	1.93926	0.536713	0	0	3.11769	13.9215	SEC61A2;ATP6V0B;ATP6AP1;ATP6V1H;TCIRG1;ACTG1;PDIA4
Spliceosome	14/150	0.0178721	1.74783	0.714883	0	0	1.97578	7.95156	HNRNPU;PRPF40B;PRPF40A;PRPF19;XAB2;SNRNP70;U2AF2;TRA2B;DHX16;RP9;HNRNPC;HNRNPA1;SRSF10;BCAS2
Cell cycle	12/124	0.0210203	1.67736	0.735709	0	0	2.05486	7.93642	TGFB2;ORC6;ESPL1;TFDP2;CHEK2;ORC3;CDC27;CDC7;E2F4;PKMYT1;ANAPC10;CDC25B
Lysosome	12/128	0.0262036	1.58164	0.811207	0	0	1.98358	7.22392	AP4M1;GNPTG;HGSNAT;LAPTM4A;ATP6V0B;LAMP1;ATP6AP1;NPC1;AP3D1;ATP6V1H;TCIRG1;CLN5
Amino sugar and nucleotide sugar metabolism	1948-06-01	0.0311347	1.50676	0.811207	0	0	2.73331	9.48305	CYB5R1;CMAS;GNPDA2;MPI;GMPPA;UAP1L1
DNA replication	1936-05-01	0.0318688	1.49663	0.811207	0	0	3.08468	10.6302	RNASEH2C;RNASEH2A;RFC2;POLE2;POLD2
AMPK signaling pathway	11/120	0.0372887	1.42842	0.87007	0	0	1.93381	6.36042	PFKFB1;GYS1;STK11;PPP2R2D;RPS6KB2;PPP2R5A;TSC1;ULK1;PIK3R2;CPT1C;MTOR
Coronavirus disease	18/232	0.042504	1.37157	0.895947	0	0	1.61428	5.09816	RPL3;RPL10;CHUK;DDX58;RPL12;RPLP0;STAT3;PIK3R2;RPS4X;MAPK11;RPS19;RPL27A;RPL38;RPS2;RPL39;RPL28;RPS21;RPL19
HIF-1 signaling pathway	10/109	0.0454628	1.34234	0.895947	0	0	1.93465	5.97972	LDHA;CAMK2D;STAT3;RPS6KB2;PIK3R2;ENO1;PDHB;ENO2;MTOR;PDK1
Cellular senescence	13/156	0.0483876	1.31527	0.895947	0	0	1.74242	5.27695	TGFB2;TSC1;PIK3R2;CALML4;LIN9;ETS1;MTOR;MAPK11;PPP3CB;CHEK2;TRPV4;VDAC2;E2F4
Proteoglycans in cancer	16/205	0.0511969	1.29076	0.895947	0	0	1.62357	4.82536	TGFB2;CAMK2D;ROCK2;STAT3;FN1;PIK3R2;PTPN11;ANK3;MTOR;ACTG1;SLC9A1;MAPK11;CTTN;RPS6KB2;ARHGEF1;PPP1R12C
Adipocytokine signaling pathway	1969-07-01	0.0556027	1.2549	0.91581	0	0	2.1601	6.24166	STK11;CHUK;STAT3;ACSL4;PTPN11;CPT1C;MTOR
Epithelial cell signaling in Helicobacter pylori infection	1970-07-01	0.0592499	1.22731	0.921665	0	0	2.1257	6.00721	MAPK11;ATP6V0B;ATP6AP1;CHUK;ATP6V1H;PTPN11;TCIRG1
Amyotrophic lateral sclerosis	25/364	0.0662375	1.1789	0.931256	0	0	1.41605	3.84388	DCTN6;NUP205;NDUFA13;COX4I1;KLC1;ACTG1;PPP3CB;NUP88;HNRNPA1;NDC1;NDUFA6;NUP210;ATG14;MTOR;ATXN2L;PSMA6;MAPK11;PSMA3;CCS;NDUFS2;ULK1;NDUFS1;TARDBP;ATG2B;NUP37
Tuberculosis	14/180	0.0665183	1.17706	0.931256	0	0	1.61614	4.38018	HSPA9;TGFB2;ATP6V0B;CAMK2D;ATP6AP1;NFYA;RFXANK;CALML4;LSP1;TCIRG1;MAPK11;PPP3CB;LAMP1;ATP6V1H
PD-L1 expression and PD-1 checkpoint pathway in cancer	1989-08-01	0.0757971	1.12035	0.981871	0	0	1.88963	4.87466	MAPK11;PPP3CB;CHUK;STAT3;RPS6KB2;PIK3R2;PTPN11;MTOR
Base excision repair	1933-04-01	0.0799554	1.09715	0.981871	0	0	2.63555	6.65816	POLE2;POLD2;XRCC1;NEIL1
Autophagy	11/137	0.0808185	1.09249	0.981871	0	0	1.67139	4.20447	STK11;LAMP1;MTMR14;ATG9A;RPS6KB2;TSC1;ULK1;PIK3R2;ATG14;MTOR;ATG2B
Pancreatic cancer	1976-07-01	0.0841603	1.07489	0.981871	0	0	1.94024	4.80216	TGFB2;CHUK;STAT3;RPS6KB2;PIK3R2;RALGDS;MTOR
Ubiquitin mediated proteolysis	11/140	0.090851	1.04167	0.999996	0	0	1.63226	3.91504	HERC4;PPIL2;SMURF1;CDC27;UBR5;UBE2E1;WWP1;BIRC6;PRPF19;ANAPC10;PML
Arginine biosynthesis	2023-03-22	0.0940662	1.02657	0.999996	0	0	3.01557	7.12807	ACY1;GOT1;GLS2
Phosphatidylinositol signaling system	1997-08-01	0.110808	0.95543	0.999996	0	0	1.71904	3.78183	INPP4A;IPPK;PPIP5K2;MTMR14;IPMK;PIK3R2;CALML4;DGKZ
Acute myeloid leukemia	1967-06-01	0.116357	0.934208	0.999996	0	0	1.88007	4.0442	CHUK;STAT3;RPS6KB2;PIK3R2;MTOR;PML
Thermogenesis	16/232	0.118892	0.924848	0.999996	0	0	1.41858	3.02093	COX19;NDUFA13;KDM3A;NDUFA6;COX16;COX4I1;ACSL4;TSC1;CPT1C;MTOR;ACTG1;MAPK11;NDUFAF5;RPS6KB2;NDUFS2;NDUFS1
Progesterone-mediated oocyte maturation	8/100	0.125874	0.900065	0.999996	0	0	1.66272	3.44596	STK10;MAPK11;HSP90AB1;CDC27;PIK3R2;PKMYT1;ANAPC10;CDC25B
Fanconi anemia pathway	1954-05-01	0.130579	0.884127	0.999996	0	0	1.94968	3.96912	SLX4;CENPX;REV1;FANCA;FANCG
Central carbon metabolism in cancer	1970-06-01	0.135488	0.868098	0.999996	0	0	1.79166	3.58129	LDHA;GLS2;PIK3R2;PDHB;MTOR;PDK1
Longevity regulating pathway	8/102	0.136481	0.864929	0.999996	0	0	1.62718	3.24064	STK11;ATF6B;EHMT2;RPS6KB2;TSC1;ULK1;PIK3R2;MTOR
Ferroptosis	1941-04-01	0.146078	0.835416	0.999996	0	0	2.06483	3.97195	LPCAT3;VDAC2;ACSL4;CP
Homologous recombination	1941-04-01	0.146078	0.835416	0.999996	0	0	2.06483	3.97195	RAD51D;POLD2;UIMC1;RAD54B
mTOR signaling pathway	11/154	0.147109	0.832362	0.999996	0	0	1.47137	2.82	FLCN;STK11;CHUK;RPS6KB2;ATP6V1H;TSC1;ULK1;PIK3R2;DEPDC5;FNIP1;MTOR
Glucagon signaling pathway	8/107	0.16487	0.782859	0.999996	0	0	1.54459	2.78427	PFKFB1;GYS1;LDHA;PPP3CB;CAMK2D;CALML4;PDHB;CPT1C
Fatty acid degradation	1943-04-01	0.165159	0.782098	0.999996	0	0	1.95874	3.52739	ECI2;ACSL4;CPT1C;ACAT1
Insulin resistance	8/108	0.170853	0.767378	0.999996	0	0	1.52906	2.70178	GYS1;SLC27A1;STAT3;RPS6KB2;MLX;PIK3R2;PTPN11;MTOR
Ribosome biogenesis in eukaryotes	8/108	0.170853	0.767378	0.999996	0	0	1.52906	2.70178	POP1;NVL;WDR3;EFL1;XRN2;MDN1;WDR43;GNL3
Chronic myeloid leukemia	1976-06-01	0.177763	0.750158	0.999996	0	0	1.63757	2.82857	TGFB2;MECOM;CHUK;SHC1;PIK3R2;PTPN11
Basal transcription factors	1945-04-01	0.18507	0.732664	0.999996	0	0	1.86299	3.14291	GTF2A2;TAF9;GTF2IRD1;GTF2I
Oocyte meiosis	9/129	0.194871	0.710253	0.999996	0	0	1.43343	2.34425	MAPK11;PPP3CB;CAMK2D;ESPL1;CDC27;PPP2R5A;CALML4;PKMYT1;ANAPC10
RNA polymerase	2023-03-31	0.19945	0.700167	0.999996	0	0	2.04531	3.29743	POLR3A;POLR3C;POLR3E
Cytosolic DNA-sensing pathway	1963-05-01	0.204681	0.688923	0.999996	0	0	1.64636	2.61163	POLR3A;CHUK;DDX58;POLR3C;POLR3E
Human T-cell leukemia virus 1 infection	14/219	0.20509	0.688055	0.999996	0	0	1.30597	2.06905	FDPS;TGFB2;RANBP3;CHUK;ATF6B;PIK3R2;ETS1;ANAPC10;PPP3CB;ESPL1;CHEK2;CDC27;VDAC2;TCF3
Pyruvate metabolism	1947-04-01	0.20571	0.686745	0.999996	0	0	1.77615	2.80861	LDHA;PDHB;ME2;ACAT1
Primary bile acid biosynthesis	2023-02-17	0.206795	0.684461	0.999996	0	0	2.54446	4.01014	ACOT8;SCP2
Dopaminergic synapse	9/132	0.212979	0.671663	0.999996	0	0	1.39824	2.16247	MAPK11;PPP3CB;CAMK2D;GNGT2;ATF6B;GNB2;PPP2R2D;PPP2R5A;CALML4
Diabetic cardiomyopathy	13/203	0.214207	0.669165	0.999996	0	0	1.30814	2.01559	NDUFA13;TGFB2;CAMK2D;NDUFA6;COX4I1;PIK3R2;PDHB;MTOR;GYS1;MAPK11;VDAC2;NDUFS2;NDUFS1
Choline metabolism in cancer	1998-07-01	0.216682	0.664177	0.999996	0	0	1.46946	2.24729	CHKA;RPS6KB2;TSC1;PIK3R2;DGKZ;RALGDS;MTOR
Glycerophospholipid metabolism	1998-07-01	0.216682	0.664177	0.999996	0	0	1.46946	2.24729	CHKA;PNPLA7;LPCAT4;LPCAT3;PNPLA6;TAZ;DGKZ
Oxidative phosphorylation	9/133	0.219159	0.65924	0.999996	0	0	1.38689	2.10524	NDUFA13;ATP6V0B;NDUFA6;ATP6AP1;COX4I1;ATP6V1H;NDUFS2;NDUFS1;TCIRG1
Peroxisome	1982-06-01	0.224595	0.6486	0.999996	0	0	1.50781	2.25185	ABCD4;ACOT8;SCP2;ECI2;ACSL4;PEX14
D-Glutamine and D-glutamate metabolism	2023-01-05	0.225628	0.646607	0.999996	0	0	4.76883	7.10015	GLS2
Fructose and mannose metabolism	1933-03-01	0.225787	0.646301	0.999996	0	0	1.90875	2.84054	PFKFB1;MPI;GMPPA
Human cytomegalovirus infection	14/225	0.233651	0.631433	0.999996	0	0	1.26843	1.8442	CHUK;ATF6B;ROCK2;STAT3;PIK3R2;TSC1;CALML4;MTOR;MAPK11;PPP3CB;GNGT2;GNB2;RPS6KB2;ARHGEF1
Protein processing in endoplasmic reticulum	11/171	0.234338	0.630157	0.999996	0	0	1.31385	1.90638	SEC61A2;DNAJB2;HSP90AB1;SSR4;ATF6B;DNAJB11;DERL2;PREB;SEC62;RNF5;PDIA4
Cysteine and methionine metabolism	1950-04-01	0.237809	0.623771	0.999996	0	0	1.66006	2.38431	MTAP;LDHA;GOT1;AMD1
Glycolysis / Gluconeogenesis	1967-05-01	0.241311	0.617424	0.999996	0	0	1.53982	2.18911	LDHA;ADPGK;ENO1;PDHB;ENO2
Yersinia infection	9/137	0.244543	0.611645	0.999996	0	0	1.34327	1.89181	MAPK11;CHUK;ROCK2;FN1;PIK3R2;ARHGEF1;PKN2;PKN1;ACTG1
Protein digestion and absorption	7/103	0.253988	0.595187	0.999996	0	0	1.39256	1.90846	COL27A1;COL5A1;COL5A3;COL7A1;COL12A1;COL11A2;KCNN4
Fluid shear stress and atherosclerosis	9/139	0.257599	0.589056	0.999996	0	0	1.32246	1.79372	MAPK11;GSTM1;HSP90AB1;CHUK;TRPV4;PIK3R2;CALML4;ARHGEF2;ACTG1
Renal cell carcinoma	1969-05-01	0.260248	0.584612	0.999996	0	0	1.49154	2.00779	FLCN;TGFB2;PIK3R2;PTPN11;ETS1
C-type lectin receptor signaling pathway	7/104	0.261671	0.582245	0.999996	0	0	1.37813	1.84762	MAPK11;PPP3CB;CHUK;PIK3R2;PTPN11;CALML4;LSP1
Phenylalanine, tyrosine and tryptophan biosynthesis	2023-01-06	0.26424	0.578002	0.999996	0	0	3.81486	5.07719	GOT1
Starch and sucrose metabolism	1936-03-01	0.266381	0.574497	0.999996	0	0	1.73496	2.29505	GYS1;AGL;ENPP1
Pathways of neurodegeneration	27/475	0.267159	0.57323	0.999996	0	0	1.15286	1.52167	DCTN6;NDUFA13;CAMK2D;CSF1;COX4I1;HTRA2;CALML4;KLC1;PPP3CB;ATXN1L;NDUFA6;CSNK1E;ATG14;MTOR;ATXN2L;PSMA6;MAPK11;PSMA3;CCS;DLG4;MAP3K10;VDAC2;NDUFS2;ULK1;NDUFS1;TARDBP;ATG2B
Lipid and atherosclerosis	13/215	0.276519	0.558276	0.999996	0	0	1.22964	1.58067	CAMK2D;HSP90AB1;CHUK;ROCK2;STAT3;LY96;PIK3R2;CALML4;VLDLR;MAPK11;PPP3CB;ARHGEF1;LDLR
Pantothenate and CoA biosynthesis	2023-02-21	0.281838	0.55	0.999996	0	0	2.00836	2.54343	ENPP1;COASY
Terpenoid backbone biosynthesis	2023-02-22	0.300615	0.521989	0.999996	0	0	1.90784	2.29308	FDPS;ACAT1
Pyrimidine metabolism	1956-04-01	0.304858	0.515902	0.999996	0	0	1.46805	1.7439	NT5C;NME6;ENPP1;NT5C2
Rheumatoid arthritis	1993-06-01	0.318626	0.496719	0.999996	0	0	1.3164	1.50562	ATP6V0B;TGFB2;CSF1;ATP6AP1;ATP6V1H;TCIRG1
Glioma	1975-05-01	0.318801	0.496481	0.999996	0	0	1.36326	1.55847	CAMK2D;SHC1;PIK3R2;CALML4;MTOR
Mismatch repair	2023-02-23	0.319307	0.495792	0.999996	0	0	1.81689	2.07417	RFC2;POLD2
Protein export	2023-02-23	0.319307	0.495792	0.999996	0	0	1.81689	2.07417	SEC61A2;SEC62
FoxO signaling pathway	8/131	0.329611	0.481999	0.999996	0	0	1.24163	1.37801	MAPK11;STK11;USP7;TGFB2;CHUK;STAT3;PIK3R2;CSNK1E
Tight junction	10/169	0.334954	0.475014	0.999996	0	0	1.20077	1.31335	VASP;STK11;CTTN;ROCK2;PPP2R2D;MYL6B;ARHGEF2;RAPGEF6;ACTG1;LLGL2
Riboflavin metabolism	2023-01-08	0.335789	0.473933	0.999996	0	0	2.72461	2.97329	ENPP1
Sulfur relay system	2023-01-08	0.335789	0.473933	0.999996	0	0	2.72461	2.97329	URM1
Bacterial invasion of epithelial cells	1977-05-01	0.338695	0.470191	0.999996	0	0	1.32525	1.43479	CTTN;SHC1;FN1;PIK3R2;ACTG1
Porphyrin and chlorophyll metabolism	1943-03-01	0.363087	0.439989	0.999996	0	0	1.43081	1.44957	UROS;PPOX;CP
mRNA surveillance pathway	1998-06-01	0.363288	0.439749	0.999996	0	0	1.24453	1.26016	CPSF4;SMG1;FIP1L1;PPP2R2D;PPP2R5A;TARDBP
Ras signaling pathway	13/232	0.372805	0.428518	0.999996	0	0	1.13316	1.11809	CSF1;CHUK;SHC1;PIK3R2;PTPN11;CALML4;ETS1;EFNA1;RASSF1;SYNGAP1;GNGT2;GNB2;RALGDS
Apelin signaling pathway	8/137	0.375084	0.425871	0.999996	0	0	1.1835	1.16055	HDAC5;GNGT2;GNB2;RPS6KB2;SPP1;CALML4;MTOR;SLC9A1
Insulin signaling pathway	8/137	0.375084	0.425871	0.999996	0	0	1.1835	1.16055	GYS1;SHC1;RPS6KB2;TRIP10;TSC1;PIK3R2;CALML4;MTOR
Alzheimer disease	20/369	0.382405	0.417476	0.999996	0	0	1.09416	1.05179	NDUFA13;NDUFA6;CSF1;CHUK;COX4I1;PIK3R2;CALML4;CSNK1E;ATG14;KLC1;MTOR;PSMA6;PPP3CB;PSMA3;VDAC2;NDUFS2;ULK1;NDUFS1;NAE1;ATG2B
Neurotrophin signaling pathway	7/119	0.382423	0.417456	0.999996	0	0	1.19261	1.14637	MAPK11;CAMK2D;PRDM4;SHC1;PIK3R2;PTPN11;CALML4
Lysine degradation	1963-04-01	0.385021	0.414515	0.999996	0	0	1.29339	1.23449	MECOM;EHMT2;COLGALT1;ACAT1
Biosynthesis of unsaturated fatty acids	2023-02-27	0.392514	0.406145	0.999996	0	0	1.52587	1.42697	SCP2;HACD3
GnRH secretion	1964-04-01	0.396445	0.401817	0.999996	0	0	1.27177	1.17666	GABBR1;SPP1;PIK3R2;KCNN4
Thyroid hormone signaling pathway	7/121	0.3989	0.399136	0.999996	0	0	1.17157	1.07672	MED12;MED1;NCOR1;PIK3R2;MTOR;ACTG1;SLC9A1
Synthesis and degradation of ketone bodies	2023-01-10	0.400387	0.39752	0.999996	0	0	2.11892	1.9395	ACAT1
PI3K-Akt signaling pathway	19/354	0.403521	0.394134	0.999996	0	0	1.0826	0.982488	HSP90AB1;CSF1;CHUK;ATF6B;FN1;PPP2R5A;PIK3R2;TSC1;MTOR;EFNA1;GYS1;STK11;GNGT2;GNB2;PPP2R2D;RPS6KB2;SPP1;PKN2;PKN1
Proteasome	1946-03-01	0.404168	0.393438	0.999996	0	0	1.33078	1.20558	PSMA6;PSMA3;PSME2
Butanoate metabolism	2023-02-28	0.410282	0.386918	0.999996	0	0	1.4671	1.30706	AACS;ACAT1
Nucleotide excision repair	1947-03-01	0.4177	0.379136	0.999996	0	0	1.30046	1.13529	RFC2;POLE2;POLD2
ErbB signaling pathway	1985-05-01	0.418639	0.378161	0.999996	0	0	1.19223	1.03813	CAMK2D;SHC1;RPS6KB2;PIK3R2;MTOR
Axon guidance	10/182	0.422401	0.374275	0.999996	0	0	1.10925	0.955949	EFNA1;ENAH;PPP3CB;CAMK2D;ROCK2;RYK;PIK3R2;PLXNB1;PTPN11;NEO1
Hippo signaling pathway	9/163	0.425438	0.371164	0.999996	0	0	1.11494	0.952872	RASSF1;TGFB2;DLG4;DLG5;PPP2R2D;CSNK1E;AJUBA;ACTG1;LLGL2
Colorectal cancer	1986-05-01	0.428566	0.367982	0.999996	0	0	1.17744	0.997661	TGFB2;RPS6KB2;PIK3R2;RALGDS;MTOR
Ubiquinone and other terpenoid-quinone biosynthesis	2023-01-11	0.430293	0.366236	0.999996	0	0	1.90693	1.60809	COQ2
Mitophagy	1968-04-01	0.441706	0.354867	0.999996	0	0	1.19203	0.974023	FIS1;ATG9A;ULK1;USP30
Th17 cell differentiation	6/107	0.444026	0.352592	0.999996	0	0	1.13309	0.919923	MAPK11;PPP3CB;HSP90AB1;CHUK;STAT3;MTOR
Pentose phosphate pathway	1930-02-01	0.44502	0.351621	0.999996	0	0	1.36217	1.10286	RPE;PGLS
Wnt signaling pathway	9/166	0.446886	0.349804	0.999996	0	0	1.09347	0.880734	PORCN;PPP3CB;CAMK2D;VANGL2;ROCK2;RYK;PRICKLE3;CSNK1E;SENP2
Amphetamine addiction	1969-04-01	0.452872	0.344024	0.999996	0	0	1.17363	0.929686	PPP3CB;CAMK2D;ATF6B;CALML4
Cholesterol metabolism	1950-03-01	0.457632	0.339484	0.999996	0	0	1.21726	0.951521	NPC1;VDAC2;LDLR
Huntington disease	16/306	0.458734	0.338439	0.999996	0	0	1.05244	0.82015	DCTN6;NDUFA13;NDUFA6;COX4I1;ATG14;KLC1;MTOR;PSMA6;PSMA3;DLG4;VDAC2;MAP3K10;NDUFS2;ULK1;NDUFS1;ATG2B
Hepatocellular carcinoma	9/168	0.461127	0.336179	0.999996	0	0	1.0796	0.835695	TGFB2;PBRM1;GSTM1;SHC1;RPS6KB2;PIK3R2;BRD7;MTOR;ACTG1
Prolactin signaling pathway	1970-04-01	0.463965	0.333515	0.999996	0	0	1.15579	0.887583	MAPK11;SHC1;STAT3;PIK3R2
Rap1 signaling pathway	11/210	0.47712	0.321373	0.999996	0	0	1.05418	0.780077	VASP;ENAH;EFNA1;MAPK11;CSF1;KRIT1;PIK3R2;CALML4;RALGDS;RAPGEF6;ACTG1
TNF signaling pathway	6/112	0.488077	0.311512	0.999996	0	0	1.07936	0.774203	MAPK11;CSF1;CHUK;ATF6B;PIK3R2;DNM1L
Toxoplasmosis	6/112	0.488077	0.311512	0.999996	0	0	1.07936	0.774203	MAPK11;TGFB2;CHUK;STAT3;LY96;LDLR
SNARE interactions in vesicular transport	1933-02-01	0.494893	0.305488	0.999996	0	0	1.23015	0.865304	BNIP1;USE1
Kaposi sarcoma-associated herpesvirus infection	10/193	0.49627	0.304282	0.999996	0	0	1.04196	0.730034	MAPK11;PPP3CB;GNGT2;CHUK;GNB2;STAT3;PIK3R2;CALML4;ATG14;MTOR
Inositol phosphate metabolism	1973-04-01	0.496733	0.303877	0.999996	0	0	1.10536	0.773423	INPP4A;IPPK;MTMR14;IPMK
p53 signaling pathway	1973-04-01	0.496733	0.303877	0.999996	0	0	1.10536	0.773423	PIDD1;AIFM2;CHEK2;CCNG1
Leukocyte transendothelial migration	6/114	0.505391	0.296373	0.999996	0	0	1.05926	0.722861	VASP;MAPK11;ROCK2;PIK3R2;PTPN11;ACTG1
TGF-beta signaling pathway	1994-05-01	0.506316	0.295578	0.999996	0	0	1.07115	0.729021	TGFB2;SMURF1;RPS6KB2;E2F4;NEO1
PPAR signaling pathway	1974-04-01	0.507466	0.294593	0.999996	0	0	1.08951	0.739044	SLC27A1;SCP2;ACSL4;CPT1C
Propanoate metabolism	1934-02-01	0.510874	0.291686	0.999996	0	0	1.19165	0.800347	LDHA;ACAT1
Non-alcoholic fatty liver disease	8/155	0.511355	0.291278	0.999996	0	0	1.03759	0.695903	MAPK11;NDUFA13;NDUFA6;COX4I1;MLX;NDUFS2;PIK3R2;NDUFS1
Gastric acid secretion	1976-04-01	0.528615	0.27686	0.999996	0	0	1.05914	0.675193	CAMK2D;CALML4;ACTG1;SLC9A1
Hedgehog signaling pathway	1956-03-01	0.533637	0.272754	0.999996	0	0	1.07912	0.677728	CSNK1G3;SMURF1;CSNK1E
Thiamine metabolism	2023-01-15	0.535738	0.271048	0.999996	0	0	1.3618	0.849917	NTPCR
Inflammatory mediator regulation of TRP channels	1998-05-01	0.5436	0.264721	0.999996	0	0	1.02487	0.624698	MAPK11;CAMK2D;TRPV4;PIK3R2;CALML4
Growth hormone synthesis, secretion and action	6/119	0.547679	0.261474	0.999996	0	0	1.01212	0.609361	MAPK11;ATF6B;SHC1;STAT3;PIK3R2;MTOR
Sphingolipid signaling pathway	6/119	0.547679	0.261474	0.999996	0	0	1.01212	0.609361	MAPK11;CERS5;ROCK2;PPP2R2D;PPP2R5A;PIK3R2
Antigen processing and presentation	1978-04-01	0.549311	0.260182	0.999996	0	0	1.0304	0.617305	HSP90AB1;NFYA;PSME2;RFXANK
Synaptic vesicle cycle	1978-04-01	0.549311	0.260182	0.999996	0	0	1.0304	0.617305	ATP6V0B;UNC13A;ATP6V1H;TCIRG1
Alanine, aspartate and glutamate metabolism	1937-02-01	0.556776	0.254319	0.999996	0	0	1.08933	0.637904	GOT1;GLS2
AGE-RAGE signaling pathway in diabetic complications	5/100	0.561736	0.250468	0.999996	0	0	1.00318	0.578559	MAPK11;TGFB2;STAT3;FN1;PIK3R2
Hepatitis B	8/162	0.56196	0.250294	0.999996	0	0	0.990059	0.570595	MAPK11;TGFB2;ATP6AP1;CHUK;ATF6B;DDX58;STAT3;PIK3R2
VEGF signaling pathway	1959-03-01	0.569308	0.244653	0.999996	0	0	1.02114	0.575245	MAPK11;PPP3CB;PIK3R2
Primary immunodeficiency	1938-02-01	0.571381	0.243074	0.999996	0	0	1.05902	0.592731	RFXANK;ADA
Chagas disease	5/102	0.579502	0.236945	0.999996	0	0	0.982395	0.535981	MAPK11;TGFB2;CHUK;PPP2R2D;PIK3R2
Mineral absorption	1960-03-01	0.580817	0.23596	0.999996	0	0	1.00318	0.545045	S100G;CLCN2;TRPM6
Phenylalanine metabolism	2023-01-17	0.580905	0.235895	0.999996	0	0	1.19145	0.64716	GOT1
Various types of N-glycan biosynthesis	1939-02-01	0.585632	0.232375	0.999996	0	0	1.03034	0.551298	MAN2A2;ALG13
Platelet activation	6/124	0.588272	0.230422	0.999996	0	0	0.968975	0.514106	VASP;MAPK11;ROCK2;PIK3R2;ARHGEF1;ACTG1
Parkinson disease	12/249	0.589642	0.229412	0.999996	0	0	0.964647	0.509565	PSMA6;PSMA3;NDUFA13;CAMK2D;NDUFA6;COX4I1;VDAC2;HTRA2;NDUFS2;NDUFS1;CALML4;KLC1
cGMP-PKG signaling pathway	8/167	0.596668	0.224267	0.999996	0	0	0.958671	0.495053	VASP;PPP3CB;ATF6B;ROCK2;VDAC2;GTF2IRD1;CALML4;GTF2I
NF-kappa B signaling pathway	5/104	0.596877	0.224115	0.999996	0	0	0.962447	0.496665	CARD10;PIDD1;CHUK;DDX58;LY96
Toll-like receptor signaling pathway	5/104	0.596877	0.224115	0.999996	0	0	0.962447	0.496665	MAPK11;CHUK;SPP1;LY96;PIK3R2
Fatty acid biosynthesis	2023-01-18	0.601814	0.220537	0.999996	0	0	1.12131	0.569407	ACSL4
Endocytosis	12/252	0.606362	0.217268	0.999996	0	0	0.952437	0.476483	SH3GLB2;IQSEC2;SMURF1;ARAP2;WWP1;VPS26A;AGAP3;SNF8;ARAP1;LDLR;SNX5;PML
Prion disease	13/273	0.607453	0.216487	0.999996	0	0	0.952388	0.474747	NDUFA13;NDUFA6;ATF6B;COX4I1;PIK3R2;KLC1;PSMA6;MAPK11;PPP3CB;PSMA3;VDAC2;NDUFS2;NDUFS1
Phospholipase D signaling pathway	7/148	0.610592	0.214249	0.999996	0	0	0.94587	0.466622	SHC1;TSC1;PIK3R2;PTPN11;DGKZ;RALGDS;MTOR
Retrograde endocannabinoid signaling	7/148	0.610592	0.214249	0.999996	0	0	0.94587	0.466622	MAPK11;NDUFA13;GNGT2;NDUFA6;GNB2;NDUFS2;NDUFS1
Osteoclast differentiation	6/127	0.611694	0.213466	0.999996	0	0	0.944801	0.464391	MAPK11;TGFB2;PPP3CB;CSF1;CHUK;PIK3R2
Glycosaminoglycan degradation	2023-01-19	0.621682	0.206432	0.999996	0	0	1.05896	0.503351	HGSNAT
Adrenergic signaling in cardiomyocytes	7/150	0.624723	0.204313	0.999996	0	0	0.932542	0.438712	MAPK11;CAMK2D;ATF6B;PPP2R2D;PPP2R5A;CALML4;SLC9A1
Purine metabolism	6/129	0.62689	0.202809	0.999996	0	0	0.92934	0.433987	NT5C;NME6;ENPP1;NTPCR;NT5C2;ADA
Relaxin signaling pathway	6/129	0.62689	0.202809	0.999996	0	0	0.92934	0.433987	MAPK11;GNGT2;ATF6B;SHC1;GNB2;PIK3R2
Phagosome	7/152	0.638564	0.194796	0.999996	0	0	0.919582	0.412463	SEC61A2;ATP6V0B;LAMP1;ATP6AP1;ATP6V1H;TCIRG1;ACTG1
Fat digestion and absorption	1943-02-01	0.6391	0.194431	0.999996	0	0	0.929624	0.416187	SLC27A1;ACAT1
Steroid biosynthesis	2023-01-20	0.640559	0.193441	0.999996	0	0	1.00317	0.446827	FDFT1
Oxytocin signaling pathway	7/154	0.652107	0.185681	0.999996	0	0	0.906975	0.387774	PPP3CB;CAMK2D;ROCK2;MYL6B;CALML4;PPP1R12C;ACTG1
Pathogenic Escherichia coli infection	9/197	0.653094	0.185024	0.999996	0	0	0.911658	0.388398	MAPK11;CTTN;CHUK;ROCK2;NCL;ARHGEF1;PTPN11;ARHGEF2;ACTG1
GABAergic synapse	1989-04-01	0.653783	0.184566	0.999996	0	0	0.896535	0.381009	GABBR1;GNGT2;GLS2;GNB2
Long-term potentiation	1967-03-01	0.655744	0.183266	0.999996	0	0	0.893124	0.376885	PPP3CB;CAMK2D;CALML4
ABC transporters	1945-02-01	0.66373	0.178009	0.999996	0	0	0.886292	0.363273	ABCD4;ABCA5
Cholinergic synapse	5/113	0.669798	0.174056	0.999996	0	0	0.881823	0.353416	CAMK2D;GNGT2;GNB2;KCNQ3;PIK3R2
Type II diabetes mellitus	1946-02-01	0.675528	0.170357	0.999996	0	0	0.866103	0.339738	PIK3R2;MTOR
Glutamatergic synapse	5/114	0.67734	0.169194	0.999996	0	0	0.873687	0.340373	PPP3CB;GNGT2;DLG4;GLS2;GNB2
Th1 and Th2 cell differentiation	1992-04-01	0.679279	0.167952	0.999996	0	0	0.865834	0.334839	JAG2;MAPK11;PPP3CB;CHUK
Estrogen signaling pathway	6/137	0.68409	0.164887	0.999996	0	0	0.872216	0.331151	GABBR1;HSP90AB1;ATF6B;SHC1;PIK3R2;CALML4
RIG-I-like receptor signaling pathway	1970-03-01	0.684755	0.164465	0.999996	0	0	0.852999	0.323025	MAPK11;CHUK;DDX58
Human papillomavirus infection	15/331	0.684871	0.164391	0.999996	0	0	0.903301	0.341921	ATP6V0B;ATP6AP1;CHUK;FN1;PPP2R5A;PIK3R2;TSC1;CHD4;TCIRG1;MTOR;PPP2R2D;RPS6KB2;SPP1;ATP6V1H;LLGL2
Shigellosis	11/246	0.686946	0.163078	0.999996	0	0	0.890976	0.334561	MAPK11;CTTN;CHUK;FNBP1;ROCK2;RPS6KB2;PIK3R2;ARHGEF2;ATG14;MTOR;ACTG1
Other types of O-glycan biosynthesis	1947-02-01	0.686987	0.163051	0.999996	0	0	0.846812	0.317927	B3GLCT;COLGALT1
Proximal tubule bicarbonate reclamation	2023-01-23	0.691729	0.160064	0.999996	0	0	0.866238	0.319262	GLS2
Renin-angiotensin system	2023-01-23	0.691729	0.160064	0.999996	0	0	0.866238	0.319262	THOP1
IL-17 signaling pathway	1994-04-01	0.695531	0.157683	0.999996	0	0	0.846503	0.307348	MAPK11;HSP90AB1;CHUK;IL17RC
Valine, leucine and isoleucine degradation	1948-02-01	0.698111	0.156075	0.999996	0	0	0.828359	0.297693	AACS;ACAT1
Non-small cell lung cancer	1972-03-01	0.703058	0.153009	0.999996	0	0	0.828187	0.291783	RASSF1;STAT3;PIK3R2
Vitamin digestion and absorption	2023-01-24	0.707114	0.150511	0.999996	0	0	0.828532	0.287139	SLC19A1
Cocaine addiction	1949-02-01	0.708906	0.149411	0.999996	0	0	0.810692	0.278904	ATF6B;DLG4
Ether lipid metabolism	1949-02-01	0.708906	0.149411	0.999996	0	0	0.810692	0.278904	LPCAT4;PAFAH1B2
Sphingolipid metabolism	1949-02-01	0.708906	0.149411	0.999996	0	0	0.810692	0.278904	CERS5;SMPD4
Alcoholism	8/186	0.714549	0.145968	0.999996	0	0	0.855478	0.28753	HDAC5;GNGT2;HDAC10;ATF6B;SHC1;GNB2;CALML4;SLC29A1
Apoptosis	6/142	0.716786	0.144611	0.999996	0	0	0.839927	0.279677	PIDD1;CHUK;HTRA2;PIK3R2;BIRC6;ACTG1
Circadian entrainment	1997-04-01	0.71879	0.143398	0.999996	0	0	0.819067	0.270444	CAMK2D;GNGT2;GNB2;CALML4
Prostate cancer	1997-04-01	0.71879	0.143398	0.999996	0	0	0.819067	0.270444	HSP90AB1;CHUK;PIK3R2;MTOR
Arginine and proline metabolism	1950-02-01	0.719376	0.143044	0.999996	0	0	0.79376	0.261442	GOT1;AMD1
N-Glycan biosynthesis	1950-02-01	0.719376	0.143044	0.999996	0	0	0.79376	0.261442	MAN2A2;ALG13
Aldosterone synthesis and secretion	1998-04-01	0.726245	0.138917	0.999996	0	0	0.81031	0.259192	CAMK2D;ATF6B;CALML4;LDLR
Human immunodeficiency virus 1 infection	9/212	0.735289	0.133542	0.999996	0	0	0.843621	0.259407	MAPK11;PPP3CB;GNGT2;CHUK;GNB2;RPS6KB2;PIK3R2;CALML4;MTOR
Glycosylphosphatidylinositol (GPI)-anchor biosynthesis	2023-01-26	0.735621	0.133346	0.999996	0	0	0.762169	0.234017	PIGS
Pertussis	1976-03-01	0.737208	0.13241	0.999996	0	0	0.782641	0.238616	MAPK11;LY96;CALML4
Collecting duct acid secretion	2023-01-27	0.748817	0.125624	0.999996	0	0	0.732816	0.211975	TCIRG1
Fatty acid elongation	2023-01-27	0.748817	0.125624	0.999996	0	0	0.732816	0.211975	HACD3
Influenza A	7/172	0.75965	0.119387	0.999996	0	0	0.80726	0.221914	CPSF4;FDPS;CHUK;DDX58;PIK3R2;PML;ACTG1
Phototransduction	2023-01-28	0.761355	0.118413	0.999996	0	0	0.705637	0.192396	CALML4
Regulation of actin cytoskeleton	9/218	0.764198	0.116794	0.999996	0	0	0.819141	0.22029	ENAH;ABI2;ROCK2;FN1;PIK3R2;ARHGEF1;PPP1R12C;ACTG1;SLC9A1
T cell receptor signaling pathway	4/104	0.767887	0.114702	0.999996	0	0	0.76145	0.201108	MAPK11;PPP3CB;CHUK;PIK3R2
B cell receptor signaling pathway	1981-03-01	0.775431	0.110457	0.999996	0	0	0.732278	0.186245	PPP3CB;CHUK;PIK3R2
Citrate cycle (TCA cycle)	2023-01-30	0.784587	0.105359	0.999996	0	0	0.656903	0.159363	PDHB
Glyoxylate and dicarboxylate metabolism	2023-01-30	0.784587	0.105359	0.999996	0	0	0.656903	0.159363	ACAT1
Focal adhesion	8/201	0.789813	0.102475	0.999996	0	0	0.788361	0.18602	VASP;SHC1;ROCK2;FN1;SPP1;PIK3R2;PPP1R12C;ACTG1
Circadian rhythm	2023-01-31	0.795342	0.0994462	0.999996	0	0	0.634973	0.145398	CSNK1E
Vascular smooth muscle contraction	5/133	0.798545	0.0977004	0.999996	0	0	0.743251	0.167204	ROCK2;MYL6B;ARHGEF1;CALML4;PPP1R12C
Viral carcinogenesis	8/203	0.798633	0.0976529	0.999996	0	0	0.780192	0.17543	HDAC5;USP7;GTF2A2;HDAC10;ATF6B;STAT3;PIK3R2;CHD4
Notch signaling pathway	1959-02-01	0.79997	0.0969261	0.999996	0	0	0.668112	0.14911	JAG2;ATXN1L
Hepatitis C	6/157	0.800448	0.096667	0.999996	0	0	0.755889	0.168249	CHUK;DDX58;STAT3;PPP2R2D;PIK3R2;LDLR
NOD-like receptor signaling pathway	7/181	0.803482	0.0950237	0.999996	0	0	0.76514	0.167413	MAPK11;HSP90AB1;CHUK;VDAC2;PKN2;PKN1;DNM1L
Viral myocarditis	1960-02-01	0.807527	0.0928428	0.999996	0	0	0.656559	0.140358	ACTG1;EIF4G1
Insulin secretion	1986-03-01	0.808968	0.0920688	0.999996	0	0	0.687983	0.14585	CAMK2D;ATF6B;KCNN4
ECM-receptor interaction	1988-03-01	0.821149	0.0855782	0.999996	0	0	0.671724	0.132364	SPP1;FN1;AGRN
Pentose and glucuronate interconversions	1934-01-01	0.824492	0.0838135	0.999996	0	0	0.577157	0.111384	RPE
Neutrophil extracellular trap formation	7/189	0.83707	0.077238	0.999996	0	0	0.731197	0.130041	HDAC5;MAPK11;HDAC10;VDAC2;PIK3R2;MTOR;ACTG1
Morphine addiction	1991-03-01	0.838175	0.0766653	0.999996	0	0	0.648722	0.114518	GABBR1;GNGT2;GNB2
Tyrosine metabolism	1936-01-01	0.841583	0.0749033	0.999996	0	0	0.544119	0.0938449	GOT1
Cortisol synthesis and secretion	1965-02-01	0.841614	0.0748871	0.999996	0	0	0.604291	0.1042	ATF6B;LDLR
Inflammatory bowel disease	1965-02-01	0.841614	0.0748871	0.999996	0	0	0.604291	0.1042	TGFB2;STAT3
Pathways in cancer	22/531	0.842797	0.074277	0.999996	0	0	0.819844	0.140217	JAG2;TGFB2;CAMK2D;GSTM1;HSP90AB1;CHUK;ROCK2;PLEKHG5;STAT3;FN1;PIK3R2;CALML4;ETS1;MTOR;PML;RASSF1;GNGT2;MECOM;GNB2;RPS6KB2;ARHGEF1;RALGDS
Small cell lung cancer	1992-03-01	0.843531	0.0738989	0.999996	0	0	0.641399	0.109139	CHUK;FN1;PIK3R2
Signaling pathways regulating pluripotency of stem cells	5/143	0.846211	0.0725215	0.999996	0	0	0.689027	0.115058	MAPK11;PCGF6;STAT3;PIK3R2;TCF3
Chemokine signaling pathway	7/192	0.848426	0.0713859	0.999996	0	0	0.719225	0.11822	GNGT2;CHUK;SHC1;ROCK2;GNB2;STAT3;PIK3R2
GnRH signaling pathway	1993-03-01	0.848733	0.071229	0.999996	0	0	0.634239	0.104022	MAPK11;CAMK2D;CALML4
Salivary secretion	1993-03-01	0.848733	0.071229	0.999996	0	0	0.634239	0.104022	CALML4;KCNN4;SLC9A1
African trypanosomiasis	1937-01-01	0.849494	0.0708398	0.999996	0	0	0.528977	0.0862839	THOP1
Aldosterone-regulated sodium reabsorption	1937-01-01	0.849494	0.0708398	0.999996	0	0	0.528977	0.0862839	PIK3R2
MicroRNAs in cancer	12/310	0.852133	0.0694928	0.999996	0	0	0.764692	0.122361	EFNA1;HDAC5;RASSF1;TGFB2;SHC1;GLS2;STAT3;CCNG1;PIK3R2;VIM;MTOR;CDC25B
Fc epsilon RI signaling pathway	1968-02-01	0.859343	0.0658337	0.999996	0	0	0.576732	0.0874255	MAPK11;PIK3R2
Breast cancer	5/147	0.862477	0.0642522	0.999996	0	0	0.669476	0.0990464	JAG2;SHC1;RPS6KB2;PIK3R2;MTOR
Renin secretion	1969-02-01	0.864837	0.0630659	0.999996	0	0	0.568094	0.0824956	PPP3CB;CALML4
Fc gamma R-mediated phagocytosis	1997-03-01	0.868061	0.0614499	0.999996	0	0	0.607121	0.0859038	VASP;RPS6KB2;PIK3R2
Gastric cancer	5/149	0.870054	0.0604536	0.999996	0	0	0.660107	0.0918867	TGFB2;SHC1;RPS6KB2;PIK3R2;MTOR
Bladder cancer	1941-01-01	0.877384	0.0568104	0.999996	0	0	0.475979	0.0622632	RASSF1
Salmonella infection	9/249	0.87808	0.056466	0.999996	0	0	0.712158	0.0925933	DCTN6;MAPK11;HSP90AB1;CHUK;ROCK2;LY96;PKN1;KLC1;ACTG1
Epstein-Barr virus infection	7/202	0.881737	0.054661	0.999996	0	0	0.681979	0.085835	MAPK11;USP7;CHUK;DDX58;STAT3;PIK3R2;VIM
Tryptophan metabolism	1942-01-01	0.883509	0.0537892	0.999996	0	0	0.464345	0.0575111	ACAT1
Amoebiasis	3/102	0.889134	0.0510328	0.999996	0	0	0.576306	0.0677203	TGFB2;FN1;PIK3R2
Thyroid hormone synthesis	1975-02-01	0.893859	0.0487307	0.999996	0	0	0.521236	0.0584862	ATF6B;PDIA4
Vasopressin-regulated water reabsorption	1944-01-01	0.894857	0.0482465	0.999996	0	0	0.442701	0.0491804	DCTN6
Natural killer cell mediated cytotoxicity	4/131	0.897002	0.0472064	0.999996	0	0	0.598711	0.0650779	PPP3CB;SHC1;PIK3R2;PTPN11
Glycosphingolipid biosynthesis	1945-01-01	0.900109	0.0457047	0.999996	0	0	0.432617	0.0455281	B4GALNT1
Leishmaniasis	1977-02-01	0.902169	0.044712	0.999996	0	0	0.507283	0.0522264	MAPK11;TGFB2
Necroptosis	5/159	0.902834	0.044392	0.999996	0	0	0.616916	0.0630589	CAMK2D;HSP90AB1;STAT3;VDAC2;DNM1L
Carbohydrate digestion and absorption	1947-01-01	0.909842	0.0410342	0.999996	0	0	0.413764	0.0390943	PIK3R2
Measles	4/139	0.920531	0.0359617	0.999996	0	0	0.562993	0.0466185	CHUK;DDX58;STAT3;PIK3R2
Malaria	1950-01-01	0.922693	0.0349428	0.999996	0	0	0.38837	0.0312478	TGFB2
MAPK signaling pathway	10/294	0.924967	0.033874	0.999996	0	0	0.667801	0.0520869	EFNA1;MAPK11;PPP3CB;TGFB2;MECOM;CSF1;CHUK;TAOK2;MAPK8IP3;CDC25B
Ovarian steroidogenesis	1951-01-01	0.926556	0.0331282	0.999996	0	0	0.380582	0.029031	LDLR
Cardiac muscle contraction	1987-02-01	0.93533	0.0290349	0.999996	0	0	0.447366	0.0299088	COX4I1;SLC9A1
Regulation of lipolysis in adipocytes	1955-01-01	0.940174	0.0267915	0.999996	0	0	0.352317	0.0217343	PIK3R2
Bile secretion	1990-02-01	0.942989	0.0254933	0.999996	0	0	0.432047	0.0253613	LDLR;SLC9A1
Hypertrophic cardiomyopathy	1990-02-01	0.942989	0.0254933	0.999996	0	0	0.432047	0.0253613	TGFB2;ACTG1
Glutathione metabolism	1957-01-01	0.946006	0.0241061	0.999996	0	0	0.339698	0.0188554	GSTM1
Endometrial cancer	1958-01-01	0.948705	0.0228687	0.999996	0	0	0.333721	0.0175728	PIK3R2
Dilated cardiomyopathy	1996-02-01	0.955795	0.0196353	0.999996	0	0	0.404341	0.018281	TGFB2;ACTG1
Arachidonic acid metabolism	1961-01-01	0.95602	0.0195328	0.999996	0	0	0.316985	0.0142567	LTA4H
Glycerolipid metabolism	1961-01-01	0.95602	0.0195328	0.999996	0	0	0.316985	0.0142567	DGKZ
Chemical carcinogenesis	7/239	0.956747	0.019203	0.999996	0	0	0.572087	0.0252957	GSTM1;HSP90AB1;ATF6B;STAT3;RPS6KB2;PIK3R2;MTOR
cAMP signaling pathway	6/216	0.961315	0.0171342	0.999996	0	0	0.541819	0.0213764	GABBR1;CAMK2D;ROCK2;PIK3R2;CALML4;SLC9A1
JAK-STAT signaling pathway	4/162	0.963699	0.0160585	0.999996	0	0	0.480452	0.0177653	STAT3;PIK3R2;PTPN11;MTOR
Melanogenesis	2/101	0.964317	0.0157803	0.999996	0	0	0.383818	0.0139462	CAMK2D;CALML4
Transcriptional misregulation in cancer	5/192	0.965486	0.0152539	0.999996	0	0	0.507159	0.0178132	CDK9;NCOR1;JMJD1C;TCF3;PML
Parathyroid hormone synthesis, secretion and action	2/106	0.971248	0.0126701	0.999996	0	0	0.365269	0.0106563	ATF6B;ARHGEF1
Drug metabolism	2/108	0.973639	0.0116018	0.999996	0	0	0.358339	0.00957274	GSTM1;NME6
Adherens junction	1971-01-01	0.973671	0.0115879	0.999996	0	0	0.271558	0.00724572	ACTG1
Melanoma	1972-01-01	0.974988	0.0110008	0.999996	0	0	0.267719	0.0067814	PIK3R2
Serotonergic synapse	2/113	0.978808	0.00930246	0.999996	0	0	0.342107	0.00732783	GNGT2;GNB2
Metabolism of xenobiotics by cytochrome P450	1976-01-01	0.97963	0.00893797	0.999996	0	0	0.253387	0.00521481	GSTM1
Arrhythmogenic right ventricular cardiomyopathy	1977-01-01	0.980649	0.00848637	0.999996	0	0	0.25004	0.00488592	ACTG1
Cushing syndrome	3/155	0.985101	0.00651911	0.999996	0	0	0.374305	0.00561862	CAMK2D;ATF6B;LDLR
Complement and coagulation cascades	1985-01-01	0.987167	0.00560939	0.999996	0	0	0.226131	0.00292073	CFH
Taste transduction	1986-01-01	0.987809	0.0053269	0.999996	0	0	0.223459	0.00274086	GABBR1
Staphylococcus aureus infection	1995-01-01	0.992321	0.00334767	0.999996	0	0	0.201967	0.00155682	CFH
Hematopoietic cell lineage	1999-01-01	0.993748	0.0027239	0.999996	0	0	0.193683	0.00121478	CSF1
Viral protein interaction with cytokine and cytokine receptor	1/100	0.994061	0.00258709	0.999996	0	0	0.191716	0.00114206	CSF1
Pancreatic secretion	1/102	0.994641	0.00233379	0.999996	0	0	0.1879	0.00100973	SLC9A1
Cell adhesion molecules	2/148	0.995566	0.00192997	0.999996	0	0	0.259613	0.0011537	CNTNAP1;NEO1
Calcium signaling pathway	4/240	0.998111	0.000821335	0.999996	0	0	0.320327	0.000605801	PPP3CB;CAMK2D;VDAC2;CALML4
Herpes simplex virus 1 infection	11/498	0.99954	0.000199934	0.999996	0	0	0.424164	0.00019527	EIF2B4;ZFP69;CHUK;ZFP1;DDX58;PTPN11;PIK3R2;TSC1;MTOR;PML;SRPK1
Cytokine-cytokine receptor interaction	3/295	0.999961	1.68412e-05	0.999996	0	0	0.193397	7.4996e-06	TGFB2;CSF1;IL17RC
Olfactory transduction	2/440	0.999996	1.87367e-06	0.999996	0	0	0.0851977	3.67567e-07	CAMK2D;CALML4
Neuroactive ligand-receptor interaction	1/341	0.999996	1.73279e-06	0.999996	0	0	0.0551116	2.1989e-07	GABBR1

## Sheet: A5SS
Term	Overlap	P-value		Adjusted P-value	Old P-value	Old Adjusted P-value	Odds Ratio	Combined Score	Genes
Ribosome	25/158	3.95519e-07	6.40283	0.000107977	0	0	3.58321	52.8275	RPL4;MRPS17;MRPS15;RPL3;RPL34;RPS27L;MRPL13;MRPL32;RPL7;RPS19;RPL35;RPL37;RPS11;RPL39;RPL19;RPS9;RPL23;RPL22;RPL13A;MRPL23;MRPL22;RPS27;RPL27A;RPL27;RPL29
Spliceosome	23/150	1.99572e-06	5.6999	0.000272416	0	0	3.44643	45.2327	PRPF38B;RBM25;HNRNPU;PRPF40A;CWC15;LSM7;PRPF18;PHF5A;SNRPD2;SNRPD1;SNRNP70;TRA2A;DHX15;DHX38;ACIN1;SNRPA1;SRSF5;HNRNPC;HNRNPA1;SRSF7;SF3B1;SMNDC1;CTNNBL1
Coronavirus disease	24/232	0.00075086	3.12444	0.0683283	0	0	2.18858	15.7453	RPL4;NRP1;RPS9;RPL3;CHUK;RPL34;RPL23;RPL22;RPS27L;RPL13A;RPL7;RPS27;RPS19;RPL27A;RPL35;RPL27;RPL37;PLCG1;IKBKG;RPS11;RPL29;RPL39;TLR2;RPL19
Terpenoid backbone biosynthesis	2023-05-22	0.00424207	2.37242	0.271945	0	0	5.52935	30.2052	FNTB;MVD;PDSS1;RCE1;DHDDS
Ubiquitin mediated proteolysis	15/140	0.00498068	2.30271	0.271945	0	0	2.26559	12.0126	UBE2D3;HUWE1;SYVN1;WWP2;ANAPC10;DDB1;COP1;UBR5;MDM2;UBA3;UBA1;ELOB;BIRC6;ELOC;BIRC2
RNA degradation	1979-10-01	0.00646287	2.18957	0.294061	0	0	2.73067	13.7672	EXOSC7;CNOT4;PAN2;LSM7;CNOT6L;PAN3;CNOT1;PABPC4;EXOSC8;ENO1
HIF-1 signaling pathway	12/109	0.00919861	2.03628	0.358746	0	0	2.33212	10.9346	CAMK2B;LDHA;CDKN1A;ANGPT1;MKNK2;ELOB;ENO1;PLCG1;ELOC;HIF1A;GAPDH;PDK1
RNA transport	17/186	0.0137866	1.86054	0.470467	0	0	1.89853	8.13342	EIF4A2;CYFIP1;NXT1;PABPC4;PYM1;TRNT1;THOC7;SRRM1;EEF1A1;EIF5;SUMO1;ACIN1;GEMIN6;RNPS1;NUP98;EIF2B1;RAN
Renal cell carcinoma	1969-08-01	0.0230381	1.63755	0.653025	0	0	2.46716	9.30271	FLCN;CDKN1A;TFE3;PDGFB;ELOB;ELOC;RAC1;HIF1A
mRNA surveillance pathway	1998-10-01	0.0267548	1.5726	0.653025	0	0	2.13894	7.74521	NXT1;PPP2R5E;PABPC4;PAPOLA;PYM1;PPP2R5A;ACIN1;RNPS1;SMG7;SRRM1
Protein export	2023-04-23	0.0269192	1.56994	0.653025	0	0	3.95352	14.2916	SEC61A2;SRP72;SRPRB;SEC61B
Nicotinate and nicotinamide metabolism	1935-05-01	0.030448	1.51644	0.653025	0	0	3.13115	10.9332	NNT;NAMPT;SIRT4;NADSYN1;SIRT1
Inositol phosphate metabolism	1973-08-01	0.0310964	1.50729	0.653025	0	0	2.31485	8.03406	INPP4A;ALDH6A1;INPPL1;PI4KA;PLCG1;SYNJ2;PIK3C2A;PIK3C2B
Phosphonate and phosphinate metabolism	2023-02-06	0.0336105	1.47353	0.655405	0	0	9.37846	31.8203	PCYT2;CEPT1
Vibrio cholerae infection	1950-06-01	0.0397964	1.40016	0.724295	0	0	2.5625	8.26144	SEC61A2;ATP6V0B;ATP6V1G1;TCIRG1;SEC61B;PLCG1
Small cell lung cancer	1992-09-01	0.0434876	1.36163	0.742008	0	0	2.03953	6.39448	CDKN1A;CHUK;CKS2;BAX;LAMC2;IKBKG;BIRC2;PTK2;CKS1B
Ribosome biogenesis in eukaryotes	10/108	0.0474196	1.32404	0.761504	0	0	1.91967	5.85253	NOP56;LSG1;NOP58;NXT1;WDR3;SBDS;RIOK1;UTP18;RAN;REXO5
Viral carcinogenesis	16/203	0.0538738	1.26862	0.784371	0	0	1.61169	4.70794	YWHAE;CDKN1A;TBP;HDAC10;MRPS18B;CHD4;GTF2E2;DDB1;KAT2A;DLG1;YWHAQ;RASA2;MDM2;BAX;IKBKG;RAC1
Fc gamma R-mediated phagocytosis	1997-09-01	0.0574631	1.24061	0.784371	0	0	1.92313	5.49365	ACTR3;ARPC2;SPHK1;ARPC5L;INPPL1;AMPH;ASAP1;PLCG1;RAC1
Phosphatidylinositol signaling system	1997-09-01	0.0574631	1.24061	0.784371	0	0	1.92313	5.49365	INPP4A;PIP4P1;INPPL1;PI4KA;PLCG1;SYNJ2;IP6K1;PIK3C2A;PIK3C2B
Epithelial cell signaling in Helicobacter pylori infection	1970-07-01	0.0637097	1.19579	0.828227	0	0	2.08794	5.74897	ATP6V0B;ATP6V1G1;CHUK;TCIRG1;IKBKG;RAC1;PLCG1
Hippo signaling pathway	13/163	0.0712541	1.14719	0.884198	0	0	1.63082	4.30782	YWHAE;WWC1;FZD6;SMAD7;MOB1A;RASSF1;DLG1;FRMD6;PARD6A;YWHAQ;PARD3;TEAD2;BIRC2
Axon guidance	14/182	0.0795097	1.09958	0.916357	0	0	1.56817	3.9704	CAMK2B;NRP1;EPHA7;ARHGEF12;SEMA4C;GNAI3;PTK2;GNAI2;PARD6A;PARD3;PLXNA1;PLCG1;RAC1;PLXNA3
Salmonella infection	18/249	0.0832435	1.07965	0.916357	0	0	1.4673	3.64768	ACTR3;CYFIP1;RAB5B;HSP90AB1;CHUK;ARPC5L;KLC1;PIK3C2A;PIK3C2B;ARPC2;FLNA;BAX;IKBKG;RAC1;GAPDH;BIRC2;VPS16;TLR2
Base excision repair	1933-04-01	0.0839155	1.07616	0.916357	0	0	2.58887	6.41508	SMUG1;FEN1;PARP3;LIG3
Endocytosis	18/252	0.0906912	1.04243	0.952257	0	0	1.44825	3.47624	ACTR3;RAB5B;ARPC5L;VPS37C;VPS37A;ASAP1;STAM;RAB11B;RNF41;ACAP1;PARD6A;ARPC2;PARD3;GRK6;MDM2;AMPH;EPS15;AP2M1
Ubiquinone and other terpenoid-quinone biosynthesis	2023-02-11	0.104286	0.981772	0.999996	0	0	4.16711	9.42022	COQ2;COQ6
DNA replication	1936-04-01	0.10753	0.968469	0.999996	0	0	2.34579	5.23107	FEN1;RFC3;MCM3;MCM4
Mismatch repair	2023-03-23	0.108422	0.964882	0.999996	0	0	2.81395	6.25181	RFC3;PMS2;MLH1
Parkinson disease	17/249	0.131513	0.88103	0.999996	0	0	1.37835	2.79619	CAMK2B;DAXX;COX4I1;NDUFA10;GNAI3;HTRA2;UQCR11;SDHC;KLC1;GNAI2;PSMA3;PSMD4;NDUFS6;BAX;UBA1;NDUFS1;PLCG1
Thermogenesis	16/232	0.13184	0.879954	0.999996	0	0	1.39316	2.82277	COX19;PRKAB2;KDM3A;SMARCB1;COX15;COX4I1;NDUFA10;FRS2;UQCR11;SDHC;ADCY6;NDUFS6;NDUFAF4;PRKG2;NDUFS1;COX20
Oxidative phosphorylation	10/133	0.138166	0.859599	0.999996	0	0	1.52747	3.02331	ATP6V1G1;ATP6V0B;COX15;NDUFS6;COX4I1;NDUFA10;SDHC;NDUFS1;UQCR11;TCIRG1
Proteoglycans in cancer	14/205	0.159205	0.798042	0.999996	0	0	1.37764	2.5315	CAMK2B;CD63;CDKN1A;ARHGEF12;FZD6;FRS2;HIF1A;PTK2;TFAP4;MDM2;FLNA;PLCG1;RAC1;TLR2
Thyroid hormone signaling pathway	9/121	0.161051	0.793037	0.999996	0	0	1.50912	2.7557	PFKFB2;MED12;NCOA2;KAT2A;NCOR1;MDM2;ATP2A2;PLCG1;HIF1A
p53 signaling pathway	1973-06-01	0.164799	0.783045	0.999996	0	0	1.68079	3.03052	CDKN1A;COP1;ZMAT3;MDM2;BAX;MDM4
Cell cycle	9/124	0.178029	0.749509	0.999996	0	0	1.46951	2.5361	ORC5;YWHAE;CDKN1A;TFDP1;YWHAQ;MDM2;MCM3;MCM4;ANAPC10
Glioma	1975-06-01	0.17977	0.745283	0.999996	0	0	1.6319	2.80047	CAMK2B;CDKN1A;PDGFB;MDM2;BAX;PLCG1
Vasopressin-regulated water reabsorption	1944-04-01	0.182473	0.738802	0.999996	0	0	1.87584	3.1911	RAB5B;AQP3;ADCY6;RAB11B
Apoptosis	10/142	0.184491	0.734024	0.999996	0	0	1.42264	2.40448	BECN1;DAXX;PARP3;CHUK;HTRA2;BAX;CTSW;BIRC6;IKBKG;BIRC2
Shigellosis	16/246	0.185071	0.732661	0.999996	0	0	1.30738	2.20557	ACTR3;BECN1;CHUK;UBE2D3;ARPC5L;PTK2;CAPNS1;ARPC2;TIFA;MDM2;BAX;PLCG1;IKBKG;RAC1;UBE2V1;TECPR1
Chronic myeloid leukemia	1976-06-01	0.187453	0.727107	0.999996	0	0	1.6085	2.693	CDKN1A;CHUK;CTBP1;MDM2;BAX;IKBKG
Basal transcription factors	1945-04-01	0.192842	0.714798	0.999996	0	0	1.82999	3.01195	TBP;TAF13;TAF6;GTF2E2
beta-Alanine metabolism	2023-03-30	0.193076	0.714272	0.999996	0	0	2.08364	3.4269	ALDH6A1;SMOX;ACADS
Lysosome	9/128	0.201856	0.694958	0.999996	0	0	1.41982	2.27199	AP4M1;CD63;ATP6V0B;AP1G2;GAA;FUCA2;CTSW;PPT2;TCIRG1
Galactose metabolism	2023-03-31	0.206288	0.685526	0.999996	0	0	2.00911	3.17135	B4GALT2;GAA;GANC
RNA polymerase	2023-03-31	0.206288	0.685526	0.999996	0	0	2.00911	3.17135	POLR1B;POLR3H;POLR2H
Lysine degradation	1963-05-01	0.214271	0.669036	0.999996	0	0	1.61717	2.49127	NSD3;PRDM9;KMT2A;SMYD2;EZH2
Fructose and mannose metabolism	1933-03-01	0.233275	0.632132	0.999996	0	0	1.87498	2.7291	PFKFB2;GMPPB;KHK
Human papillomavirus infection	20/331	0.239989	0.619808	0.999996	0	0	1.20821	1.72432	ATP6V1G1;CDKN1A;ATP6V0B;TBP;CHUK;FZD6;PPP2R5A;CHD4;LAMC2;RFNG;TCIRG1;PTK2;THBS3;DLG1;PARD6A;PPP2R5E;PARD3;MDM2;BAX;IKBKG
Propanoate metabolism	1934-03-01	0.246997	0.607308	0.999996	0	0	1.8144	2.53721	LDHA;ALDH6A1;ACADS
Protein processing in endoplasmic reticulum	11/171	0.250953	0.600408	0.999996	0	0	1.29042	1.78399	EDEM3;SEC61A2;DNAJB1;HSP90AB1;PRKCSH;UBE2D3;SYVN1;BAX;SEC61B;UGGT2;SEC31A
Sphingolipid signaling pathway	8/119	0.256629	0.590694	0.999996	0	0	1.35225	1.83922	PPP2R5E;SPHK1;GNAI3;PPP2R5A;BAX;RAC1;CERS2;GNAI2
Yersinia infection	9/137	0.259759	0.585429	0.999996	0	0	1.31936	1.77849	ACTR3;ARHGEF12;ARPC2;CHUK;ARPC5L;PLCG1;IKBKG;RAC1;PTK2
Mitophagy	1968-05-01	0.261727	0.582151	0.999996	0	0	1.48843	1.99517	BNIP3L;BECN1;TFE3;TBC1D17;HIF1A
Vitamin B6 metabolism	2023-01-06	0.268181	0.571572	0.999996	0	0	3.74748	4.93204	PSAT1
One carbon pool by folate	2023-02-20	0.269438	0.569542	0.999996	0	0	2.08256	2.73111	ATIC;TYMS
Fluid shear stress and atherosclerosis	9/139	0.2733	0.56336	0.999996	0	0	1.29892	1.68494	HSP90AB1;MAPK7;SUMO1;CHUK;GSTO2;PDGFB;IKBKG;RAC1;PTK2
Human immunodeficiency virus 1 infection	13/212	0.279815	0.553129	0.999996	0	0	1.22607	1.56155	CHUK;GNAI3;PTK2;GNAI2;DDB1;AP1G2;BAX;ELOB;PLCG1;ELOC;IKBKG;RAC1;TLR2
Gap junction	1988-06-01	0.287841	0.540847	0.999996	0	0	1.37224	1.70891	MAPK7;GNAI3;PDGFB;PRKG2;ADCY6;GNAI2
Pathogenic Escherichia coli infection	12/197	0.298179	0.525523	0.999996	0	0	1.21709	1.47275	ACTR3;CYFIP1;ARHGEF12;ARPC2;CHUK;ARPC5L;MYH9;BAX;TMBIM6;IKBKG;RAC1;GAPDH
Spinocerebellar ataxia	9/143	0.300963	0.521486	0.999996	0	0	1.25988	1.51282	NOP56;BECN1;PSMA3;TBP;PSMD4;ATP2A2;NRBF2;PUM1;PUM2
Regulation of lipolysis in adipocytes	1955-04-01	0.304128	0.516943	0.999996	0	0	1.47039	1.75022	GNAI3;PRKG2;ADCY6;GNAI2
Mannose type O-glycan biosynthesis	2023-02-23	0.32663	0.485943	0.999996	0	0	1.78477	1.99703	B3GALNT2;B4GALT2
Legionellosis	1957-04-01	0.327363	0.48497	0.999996	0	0	1.41476	1.57984	EEF1A1;EEF1G;CR1L;TLR2
Toxoplasmosis	7/112	0.340633	0.467713	0.999996	0	0	1.24998	1.34617	CHUK;GNAI3;LAMC2;IKBKG;BIRC2;TLR2;GNAI2
Pancreatic cancer	1976-05-01	0.341633	0.46644	0.999996	0	0	1.32016	1.41788	CDKN1A;CHUK;BAX;IKBKG;RAC1
Bladder cancer	1941-03-01	0.345123	0.462026	0.999996	0	0	1.47962	1.5741	CDKN1A;RASSF1;MDM2
Notch signaling pathway	1959-04-01	0.350696	0.45507	0.999996	0	0	1.36317	1.42838	TLE3;KAT2A;CTBP1;RFNG
VEGF signaling pathway	1959-04-01	0.350696	0.45507	0.999996	0	0	1.36317	1.42838	SPHK1;RAC1;PLCG1;PTK2
Bacterial invasion of epithelial cells	1977-05-01	0.351798	0.453706	0.999996	0	0	1.30176	1.35994	ACTR3;ARPC2;ARPC5L;RAC1;PTK2
Tight junction	10/169	0.354123	0.450845	0.999996	0	0	1.17937	1.22432	ACTR3;PRKAB2;MYL6;DLG1;PARD6A;ARPC2;PARD3;ARPC5L;MYH9;RAC1
Phagosome	9/152	0.365249	0.437411	0.999996	0	0	1.18002	1.18849	SEC61A2;ATP6V1G1;RAB5B;ATP6V0B;TCIRG1;RAC1;SEC61B;TLR2;THBS3
Pathways in cancer	29/531	0.366214	0.436265	0.999996	0	0	1.08406	1.08898	CAMK2B;CDKN1A;HSP90AB1;CTBP1;PDGFB;GNAI3;LAMC2;HIF1A;ADCY6;GNAI2;CKS1B;RASSF1;ELOB;PLCG1;ELOC;IKBKG;RAC1;IL15RA;ARHGEF12;GSTO2;CHUK;FZD6;VEGFB;MLH1;PTK2;CKS2;MDM2;BAX;BIRC2
Prostate cancer	1997-06-01	0.369157	0.432788	0.999996	0	0	1.23594	1.23165	CDKN1A;HSP90AB1;CHUK;PDGFB;MDM2;IKBKG
Glycerophospholipid metabolism	1998-06-01	0.378307	0.422156	0.999996	0	0	1.22244	1.18827	PCYT2;GPAT3;CEPT1;PNPLA6;TAZ;AGPAT3
Oxytocin signaling pathway	9/154	0.379771	0.420478	0.999996	0	0	1.16362	1.1266	CAMK2B;PRKAB2;CACNB3;MYL6;CDKN1A;MAPK7;GNAI3;ADCY6;GNAI2
Chemokine signaling pathway	11/192	0.382671	0.417174	0.999996	0	0	1.13943	1.09451	CCL25;CHUK;PARD3;GRK6;GNAI3;PLCG1;IKBKG;RAC1;PTK2;ADCY6;GNAI2
Non-alcoholic fatty liver disease	9/155	0.387048	0.412235	0.999996	0	0	1.15559	1.09689	PRKAB2;NDUFS6;COX4I1;NDUFA10;BAX;SDHC;NDUFS1;UQCR11;RAC1
Amyotrophic lateral sclerosis	20/364	0.38801	0.411157	0.999996	0	0	1.09038	1.03229	BECN1;DAXX;NXT1;COX4I1;NDUFA10;UQCR11;SDHC;KLC1;PSMA3;PSMD4;NDUFS6;HNRNPA2B1;BAX;MATR3;NDUFS1;NUP98;NRBF2;RAC1;HNRNPA1;SRSF7
Cytosolic DNA-sensing pathway	1963-04-01	0.397309	0.400872	0.999996	0	0	1.27048	1.17271	CHUK;POLR3H;IKBKG;POLR2H
Neurotrophin signaling pathway	7/119	0.39914	0.398874	0.999996	0	0	1.17143	1.07589	YWHAE;CAMK2B;MAPK7;BAX;FRS2;PLCG1;RAC1
Collecting duct acid secretion	2023-02-27	0.40078	0.397094	0.999996	0	0	1.49889	1.3705	ATP6V1G1;TCIRG1
Fatty acid elongation	2023-02-27	0.40078	0.397094	0.999996	0	0	1.49889	1.3705	ACOT7;PPT2
Sulfur metabolism	2023-01-10	0.405731	0.391762	0.999996	0	0	2.0815	1.87764	PAPSS1
Tuberculosis	10/180	0.42964	0.366896	0.999996	0	0	1.10241	0.931328	CAMK2B;RAB5B;ATP6V0B;ARHGEF12;CR1L;SPHK1;BAX;RFXANK;TCIRG1;TLR2
Human T-cell leukemia virus 1 infection	12/219	0.433394	0.363117	0.999996	0	0	1.08646	0.908402	IL15RA;NRP1;CDKN1A;KAT2A;DLG1;TBP;CHUK;BAX;IKBKG;ANAPC10;ADCY6;RAN
Taurine and hypotaurine metabolism	2023-01-11	0.435876	0.360638	0.999996	0	0	1.87325	1.55554	CSAD
Amino sugar and nucleotide sugar metabolism	1948-03-01	0.442082	0.354497	0.999996	0	0	1.24899	1.0195	GMPPB;AMDHD2;PGM3
Citrate cycle (TCA cycle)	1930-02-01	0.453796	0.34314	0.999996	0	0	1.33809	1.05723	IDH1;SDHC
Sphingolipid metabolism	1949-03-01	0.455524	0.341489	0.999996	0	0	1.22178	0.960692	SMPD4;SPHK1;CERS2
Glucagon signaling pathway	6/107	0.460238	0.337018	0.999996	0	0	1.11298	0.863683	CAMK2B;PRKAB2;LDHA;PHKG2;PPP4R3A;SIRT1
Renin secretion	1969-04-01	0.46596	0.331652	0.999996	0	0	1.15284	0.880374	GNAI3;PRKG2;ADCY6;GNAI2
Wnt signaling pathway	9/166	0.467044	0.330642	0.999996	0	0	1.074	0.81767	CAMK2B;TLE3;PORCN;CTBP1;CHD8;RUVBL1;FZD6;CCN4;RAC1
Cysteine and methionine metabolism	1950-03-01	0.468828	0.328986	0.999996	0	0	1.19572	0.90578	LDHA;AHCYL1;PSAT1
Malaria	1950-03-01	0.468828	0.328986	0.999996	0	0	1.19572	0.90578	CR1L;TLR2;THBS3
Human cytomegalovirus infection	12/225	0.47075	0.32721	0.999996	0	0	1.05552	0.795261	AKAP13;CDKN1A;ARHGEF12;CHUK;GNAI3;MDM2;BAX;IKBKG;RAC1;PTK2;ADCY6;GNAI2
PD-L1 expression and PD-1 checkpoint pathway in cancer	1989-05-01	0.472947	0.325188	0.999996	0	0	1.11508	0.834943	CHUK;IKBKG;PLCG1;HIF1A;TLR2
Central carbon metabolism in cancer	1970-04-01	0.477147	0.321347	0.999996	0	0	1.13531	0.840052	LDHA;IDH1;HIF1A;PDK1
RIG-I-like receptor signaling pathway	1970-04-01	0.477147	0.321347	0.999996	0	0	1.13531	0.840052	CYLD;SIKE1;CHUK;IKBKG
Oocyte meiosis	7/129	0.482268	0.316712	0.999996	0	0	1.07484	0.783831	YWHAE;CAMK2B;YWHAQ;PPP2R5E;PPP2R5A;ANAPC10;ADCY6
Huntington disease	16/306	0.486155	0.313225	0.999996	0	0	1.03357	0.74544	BECN1;TBP;COX4I1;NDUFA10;UQCR11;SDHC;KLC1;PSMA3;PSMD4;NDUFS6;MAP3K10;BAX;NDUFS1;NRBF2;POLR2H;AP2M1
Non-homologous end-joining	2023-01-13	0.491659	0.308336	0.999996	0	0	1.56088	1.10818	FEN1
Morphine addiction	1991-05-01	0.492565	0.307537	0.999996	0	0	1.08904	0.771178	GRK6;GNAI3;PDE7A;ADCY6;GNAI2
Adrenergic signaling in cardiomyocytes	8/150	0.493281	0.306906	0.999996	0	0	1.0553	0.745758	CAMK2B;CACNB3;PPP2R5E;GNAI3;ATP2A2;PPP2R5A;ADCY6;GNAI2
Melanoma	1972-04-01	0.499243	0.301688	0.999996	0	0	1.10181	0.765383	CDKN1A;PDGFB;MDM2;BAX
Non-small cell lung cancer	1972-04-01	0.499243	0.301688	0.999996	0	0	1.10181	0.765383	CDKN1A;RASSF1;BAX;PLCG1
Rap1 signaling pathway	11/210	0.499821	0.301186	0.999996	0	0	1.03537	0.718036	PARD6A;ANGPT1;PARD3;PDGFB;GNAI3;VEGFB;KRIT1;PLCG1;RAC1;ADCY6;GNAI2
Glycosaminoglycan biosynthesis	1953-03-01	0.507817	0.294293	0.999996	0	0	1.1238	0.761523	B4GALT2;EXT2;XYLT2
Rheumatoid arthritis	1993-05-01	0.511908	0.290808	0.999996	0	0	1.06417	0.712582	ATP6V0B;ATP6V1G1;ANGPT1;TCIRG1;TLR2
Fanconi anemia pathway	1954-03-01	0.520478	0.283597	0.999996	0	0	1.1017	0.719421	REV1;PMS2;MLH1
PPAR signaling pathway	1974-04-01	0.520925	0.283225	0.999996	0	0	1.07021	0.697939	SLC27A1;PLIN4;PLIN2;SORBS1
IL-17 signaling pathway	1994-05-01	0.521465	0.282775	0.999996	0	0	1.05216	0.685074	HSP90AB1;MAPK7;CHUK;IKBKG;MAPK6
Leukocyte transendothelial migration	6/114	0.522063	0.282277	0.999996	0	0	1.04045	0.67626	GNAI3;CD99L2;PLCG1;RAC1;PTK2;GNAI2
PI3K-Akt signaling pathway	18/354	0.529553	0.276091	0.999996	0	0	1.00312	0.637706	YWHAE;CDKN1A;HSP90AB1;CHUK;ANGPT1;PDGFB;VEGFB;PPP2R5A;LAMC2;OSMR;PTK2;THBS3;YWHAQ;PPP2R5E;MDM2;IKBKG;RAC1;TLR2
Cushing syndrome	8/155	0.530753	0.275107	0.999996	0	0	1.01914	0.645581	CAMK2B;CDKN1A;KMT2A;FZD6;WDR5;GNAI3;ADCY6;GNAI2
Thiamine metabolism	2023-01-15	0.541931	0.266056	0.999996	0	0	1.33775	0.819529	NTPCR
Gastric acid secretion	1976-04-01	0.542151	0.26588	0.999996	0	0	1.04037	0.636929	CAMK2B;GNAI3;ADCY6;GNAI2
Hedgehog signaling pathway	1956-03-01	0.545256	0.263399	0.999996	0	0	1.06002	0.642901	EVC;IQCE;EFCAB7
Pyrimidine metabolism	1956-03-01	0.545256	0.263399	0.999996	0	0	1.06002	0.642901	DTYMK;TK1;TYMS
Circadian entrainment	1997-05-01	0.549636	0.259925	0.999996	0	0	1.01769	0.609085	CAMK2B;GNAI3;PRKG2;ADCY6;GNAI2
Starch and sucrose metabolism	1936-02-01	0.551148	0.258732	0.999996	0	0	1.1016	0.656283	GAA;GANC
Choline metabolism in cancer	1998-05-01	0.558847	0.252707	0.999996	0	0	1.00669	0.585773	SLC22A5;PDGFB;PLCG1;RAC1;HIF1A
Synaptic vesicle cycle	1978-04-01	0.562884	0.249581	0.999996	0	0	1.01215	0.581664	ATP6V0B;ATP6V1G1;TCIRG1;AP2M1
Thyroid cancer	1937-02-01	0.56614	0.247076	0.999996	0	0	1.07007	0.60878	CDKN1A;BAX
Endometrial cancer	1958-03-01	0.569271	0.244681	0.999996	0	0	1.02136	0.575436	CDKN1A;BAX;MLH1
NOD-like receptor signaling pathway	9/181	0.572031	0.24258	0.999996	0	0	0.979556	0.547143	YWHAE;HSP90AB1;CHUK;NAMPT;NEK7;TRIP6;IKBKG;DNM1L;BIRC2
AMPK signaling pathway	6/120	0.572699	0.242074	0.999996	0	0	0.98538	0.549246	PFKFB2;PRKAB2;PPP2R5E;PPP2R5A;SIRT1;RAB11B
Progesterone-mediated oocyte maturation	5/100	0.576982	0.238837	0.999996	0	0	0.985395	0.541911	HSP90AB1;GNAI3;ANAPC10;ADCY6;GNAI2
Primary immunodeficiency	1938-02-01	0.580767	0.235998	0.999996	0	0	1.04029	0.565301	RFXANK;IKBKG
Diabetic cardiomyopathy	10/203	0.582914	0.234396	0.999996	0	0	0.969851	0.523444	CAMK2B;NDUFS6;COX4I1;NDUFA10;ATP2A2;UQCR11;SDHC;NDUFS1;RAC1;GAPDH
Melanogenesis	5/101	0.5859	0.232176	0.999996	0	0	0.975078	0.521282	CAMK2B;FZD6;GNAI3;ADCY6;GNAI2
Selenocompound metabolism	2023-01-17	0.587236	0.231188	0.999996	0	0	1.17041	0.623043	PAPSS1
Long-term depression	1960-03-01	0.592486	0.227322	0.999996	0	0	0.985423	0.515798	GNAI3;PRKG2;GNAI2
B cell receptor signaling pathway	1981-04-01	0.592992	0.226951	0.999996	0	0	0.97256	0.508234	CHUK;INPPL1;IKBKG;RAC1
Chagas disease	5/102	0.594715	0.225691	0.999996	0	0	0.964975	0.501471	CHUK;GNAI3;IKBKG;TLR2;GNAI2
Pancreatic secretion	5/102	0.594715	0.225691	0.999996	0	0	0.964975	0.501471	ATP2A2;RAC1;SLC4A4;ADCY6;TPCN2
Various types of N-glycan biosynthesis	1939-02-01	0.595029	0.225462	0.999996	0	0	1.01212	0.52544	B4GALT2;ALG11
Peroxisome	1982-04-01	0.602752	0.219862	0.999996	0	0	0.960041	0.486021	IDH1;PEX5;MPV17;PEX11G
Other glycan degradation	2023-01-18	0.608181	0.215967	0.999996	0	0	1.1015	0.54776	FUCA2
Glycine, serine and threonine metabolism	1940-02-01	0.608923	0.215438	0.999996	0	0	0.985438	0.48884	SRR;PSAT1
C-type lectin receptor signaling pathway	5/104	0.612026	0.21323	0.999996	0	0	0.94538	0.464163	CYLD;ARHGEF12;CHUK;MDM2;IKBKG
NF-kappa B signaling pathway	5/104	0.612026	0.21323	0.999996	0	0	0.94538	0.464163	CYLD;CHUK;PLCG1;IKBKG;BIRC2
Basal cell carcinoma	1963-03-01	0.625753	0.203597	0.999996	0	0	0.936004	0.438798	CDKN1A;FZD6;BAX
Retrograde endocannabinoid signaling	7/148	0.628454	0.201727	0.999996	0	0	0.929064	0.431543	FAAH;NDUFS6;NDUFA10;GNAI3;NDUFS1;ADCY6;GNAI2
Parathyroid hormone synthesis, secretion and action	5/106	0.628899	0.201419	0.999996	0	0	0.926562	0.429724	AKAP13;CDKN1A;GNAI3;ADCY6;GNAI2
ErbB signaling pathway	1985-04-01	0.631162	0.199859	0.999996	0	0	0.924337	0.425374	CAMK2B;CDKN1A;PLCG1;PTK2
MAPK signaling pathway	14/294	0.633905	0.197976	0.999996	0	0	0.9353	0.426363	DAXX;CHUK;ANGPT1;PDGFB;VEGFB;MAPK8IP3;CACNB3;MAPK7;RASA2;MKNK2;FLNA;IKBKG;RAC1;MAP4K4
Th17 cell differentiation	5/107	0.637167	0.195747	0.999996	0	0	0.917429	0.413507	HSP90AB1;CHUK;PLCG1;IKBKG;HIF1A
Colorectal cancer	1986-04-01	0.640336	0.193592	0.999996	0	0	0.913016	0.406988	CDKN1A;BAX;RAC1;MLH1
Transcriptional misregulation in cancer	9/192	0.642842	0.191896	0.999996	0	0	0.920137	0.406569	CDKN1A;NCOR1;KMT2A;TFE3;MDM2;SIX1;BAX;PTK2;BIRC2
Purine metabolism	6/129	0.643287	0.191596	0.999996	0	0	0.912844	0.402715	ATIC;NTPCR;PDE7A;PAICS;ADCY6;PAPSS1
Steroid biosynthesis	2023-01-20	0.646939	0.189137	0.999996	0	0	0.985452	0.429168	LBR
Porphyrin and chlorophyll metabolism	1943-02-01	0.648415	0.188147	0.999996	0	0	0.913188	0.395615	COX15;HCCS
Kaposi sarcoma-associated herpesvirus infection	9/193	0.648949	0.18779	0.999996	0	0	0.915088	0.395685	BECN1;CDKN1A;CHUK;PDGFB;BAX;PLCG1;IKBKG;RAC1;HIF1A
Cardiac muscle contraction	1987-04-01	0.64936	0.187515	0.999996	0	0	0.901968	0.389441	CACNB3;COX4I1;ATP2A2;UQCR11
Lipid and atherosclerosis	10/215	0.655206	0.183622	0.999996	0	0	0.912496	0.385808	CAMK2B;HSP90AB1;CHUK;MIB2;BAX;PLCG1;IKBKG;RAC1;PTK2;TLR2
Pantothenate and CoA biosynthesis	2023-01-21	0.664857	0.177272	0.999996	0	0	0.93613	0.382113	COASY
GABAergic synapse	1989-04-01	0.666951	0.175906	0.999996	0	0	0.880652	0.356698	GNAI3;SLC38A2;ADCY6;GNAI2
Glycolysis / Gluconeogenesis	1967-03-01	0.667126	0.175792	0.999996	0	0	0.877318	0.355118	LDHA;ENO1;GAPDH
Glycosphingolipid biosynthesis	1945-02-01	0.672941	0.172023	0.999996	0	0	0.870622	0.344852	B4GALT2;ST6GALNAC6
Proteasome	1946-02-01	0.684673	0.164517	0.999996	0	0	0.850791	0.322291	PSMA3;PSMD4
Adipocytokine signaling pathway	1969-03-01	0.68652	0.163347	0.999996	0	0	0.850643	0.319944	PRKAB2;CHUK;IKBKG
Nucleotide excision repair	1947-02-01	0.696058	0.157355	0.999996	0	0	0.83184	0.301394	DDB1;RFC3
Other types of O-glycan biosynthesis	1947-02-01	0.696058	0.157355	0.999996	0	0	0.83184	0.301394	B4GALT2;RFNG
Pyruvate metabolism	1947-02-01	0.696058	0.157355	0.999996	0	0	0.83184	0.301394	LDHA;HAGH
Proximal tubule bicarbonate reclamation	2023-01-23	0.698013	0.156136	0.999996	0	0	0.850938	0.305927	SLC4A4
Apelin signaling pathway	6/137	0.699763	0.155049	0.999996	0	0	0.856734	0.305866	BECN1;PRKAB2;SPHK1;GNAI3;ADCY6;GNAI2
Insulin signaling pathway	6/137	0.699763	0.155049	0.999996	0	0	0.856734	0.305866	PRKAB2;MKNK2;PHKG2;INPPL1;FLOT1;SORBS1
Adherens junction	1971-03-01	0.705056	0.151776	0.999996	0	0	0.825537	0.288507	PARD3;RAC1;SORBS1
Intestinal immune network for IgA production	1948-02-01	0.7071	0.150519	0.999996	0	0	0.813714	0.282019	CCL25;IL15RA
Valine, leucine and isoleucine degradation	1948-02-01	0.7071	0.150519	0.999996	0	0	0.813714	0.282019	ALDH6A1;ACADS
Vitamin digestion and absorption	2023-01-24	0.713342	0.146702	0.999996	0	0	0.813898	0.27493	SLC19A1
Cocaine addiction	1949-02-01	0.717806	0.143993	0.999996	0	0	0.796359	0.264038	GNAI3;GNAI2
Ether lipid metabolism	1949-02-01	0.717806	0.143993	0.999996	0	0	0.796359	0.264038	ENPP2;CEPT1
Hepatitis B	7/162	0.719683	0.142859	0.999996	0	0	0.844521	0.277801	DDB1;CDKN1A;YWHAQ;CHUK;BAX;IKBKG;TLR2
Growth hormone synthesis, secretion and action	5/119	0.72717	0.138364	0.999996	0	0	0.820336	0.261355	GNAI3;PLCG1;PTK2;ADCY6;GNAI2
Arginine and proline metabolism	1950-02-01	0.72818	0.137761	0.999996	0	0	0.779727	0.247335	SMOX;P4HA2
N-Glycan biosynthesis	1950-02-01	0.72818	0.137761	0.999996	0	0	0.779727	0.247335	B4GALT2;ALG11
Folate biosynthesis	2023-01-26	0.741706	0.129768	0.999996	0	0	0.748707	0.223716	PTS
Ras signaling pathway	10/232	0.744376	0.128208	0.999996	0	0	0.841858	0.248524	RASSF1;RAB5B;CHUK;ANGPT1;RASA2;PDGFB;VEGFB;PLCG1;IKBKG;RAC1
AGE-RAGE signaling pathway in diabetic complications	4/100	0.752693	0.123382	0.999996	0	0	0.77929	0.221395	VEGFB;BAX;PLCG1;RAC1
Hepatocellular carcinoma	7/168	0.753751	0.122772	0.999996	0	0	0.812789	0.22977	CDKN1A;PBRM1;SMARCB1;GSTO2;FZD6;BAX;PLCG1
Biosynthesis of unsaturated fatty acids	2023-01-27	0.754818	0.122158	0.999996	0	0	0.719872	0.202485	ACOT7
Leishmaniasis	1977-03-01	0.755613	0.121701	0.999996	0	0	0.758361	0.212513	EEF1A1;CR1L;TLR2
Endocrine and other factor-regulated calcium reabsorption	1953-02-01	0.757376	0.120689	0.999996	0	0	0.733744	0.203905	AP2M1;ADCY6
Platelet activation	5/124	0.759544	0.119447	0.999996	0	0	0.78566	0.216085	ARHGEF12;GNAI3;PRKG2;ADCY6;GNAI2
Antigen processing and presentation	1978-03-01	0.763322	0.117292	0.999996	0	0	0.74821	0.202073	HSP90AB1;RFXANK;IFI30
Amoebiasis	4/102	0.7663	0.115601	0.999996	0	0	0.763306	0.203178	RAB5B;LAMC2;PTK2;TLR2
Longevity regulating pathway	4/102	0.7663	0.115601	0.999996	0	0	0.763306	0.203178	PRKAB2;BAX;SIRT1;ADCY6
Butanoate metabolism	2023-01-28	0.767266	0.115054	0.999996	0	0	0.693174	0.183637	ACADS
Pathways of neurodegeneration	21/475	0.772031	0.112365	0.999996	0	0	0.86325	0.223349	CAMK2B;BECN1;DAXX;COX4I1;FZD6;NDUFA10;HTRA2;ATP2A2;UQCR11;SDHC;KLC1;PSMA3;PSMD4;NDUFS6;MAP3K10;BAX;UBA1;NDUFS1;NRBF2;PLCG1;RAC1
Alzheimer disease	16/369	0.774691	0.110872	0.999996	0	0	0.846248	0.21604	BECN1;CHUK;COX4I1;FZD6;NDUFA10;ATP2A2;UQCR11;SDHC;KLC1;PSMA3;PSMD4;NDUFS6;NDUFS1;NRBF2;NAE1;GAPDH
Influenza A	7/172	0.774756	0.110835	0.999996	0	0	0.792916	0.202358	DNAJB1;NXT1;CHUK;BAX;NUP98;IKBKG;RAB11B
T cell receptor signaling pathway	4/104	0.779315	0.108287	0.999996	0	0	0.74796	0.186497	DLG1;CHUK;PLCG1;IKBKG
Toll-like receptor signaling pathway	4/104	0.779315	0.108287	0.999996	0	0	0.74796	0.186497	CHUK;IKBKG;RAC1;TLR2
Regulation of actin cytoskeleton	9/218	0.781046	0.107324	0.999996	0	0	0.804556	0.198823	ACTR3;CYFIP1;ARHGEF12;ARPC2;ARPC5L;PDGFB;MYH9;RAC1;PTK2
Glyoxylate and dicarboxylate metabolism	2023-01-30	0.790298	0.102209	0.999996	0	0	0.645301	0.151868	HYI
Glutathione metabolism	1957-02-01	0.792054	0.101245	0.999996	0	0	0.680237	0.158581	GSTO2;IDH1
FoxO signaling pathway	5/131	0.799888	0.0969707	0.999996	0	0	0.741737	0.165617	PRKAB2;CDKN1A;CHUK;MDM2;SIRT1
Circadian rhythm	2023-01-31	0.800946	0.0963966	0.999996	0	0	0.623758	0.13845	PRKAB2
Focal adhesion	8/201	0.804852	0.0942841	0.999996	0	0	0.774338	0.168107	PDGFB;VEGFB;FLNA;LAMC2;RAC1;PTK2;BIRC2;THBS3
Dopaminergic synapse	5/132	0.805191	0.0941009	0.999996	0	0	0.735858	0.159442	CAMK2B;PPP2R5E;GNAI3;PPP2R5A;GNAI2
Epstein-Barr virus infection	8/202	0.809128	0.091983	0.999996	0	0	0.770306	0.16315	CDKN1A;PSMD4;CHUK;MDM2;BAX;IKBKG;RAC1;TLR2
Hepatitis C	6/157	0.813258	0.0897717	0.999996	0	0	0.742471	0.153474	YWHAE;CDKN1A;YWHAQ;CHUK;BAX;IKBKG
SNARE interactions in vesicular transport	1933-01-01	0.820649	0.0858427	0.999996	0	0	0.584711	0.115574	STX16
Prion disease	11/273	0.822256	0.084993	0.999996	0	0	0.783771	0.153387	PSMA3;PSMD4;NDUFS6;COX4I1;NDUFA10;BAX;UQCR11;SDHC;NDUFS1;RAC1;KLC1
Glycerolipid metabolism	1961-02-01	0.822281	0.0849798	0.999996	0	0	0.633985	0.124054	GPAT3;AGPAT3
Necroptosis	6/159	0.822481	0.0848742	0.999996	0	0	0.732688	0.143189	CAMK2B;CYLD;HSP90AB1;BAX;DNM1L;BIRC2
TNF signaling pathway	4/112	0.825697	0.083179	0.999996	0	0	0.692263	0.132587	CHUK;IKBKG;DNM1L;BIRC2
ECM-receptor interaction	1988-03-01	0.829961	0.0809423	0.999996	0	0	0.659836	0.122978	LAMC2;AGRN;THBS3
Autophagy	5/137	0.83005	0.0808956	0.999996	0	0	0.707796	0.131841	BECN1;ATG16L2;ATG4B;NRBF2;HIF1A
Estrogen signaling pathway	5/137	0.83005	0.0808956	0.999996	0	0	0.707796	0.131841	NCOA2;HSP90AB1;GNAI3;ADCY6;GNAI2
Cholinergic synapse	4/113	0.830885	0.0804589	0.999996	0	0	0.685875	0.127068	CAMK2B;GNAI3;ADCY6;GNAI2
Glutamatergic synapse	4/114	0.835944	0.0778227	0.999996	0	0	0.679604	0.121781	GNAI3;SLC38A2;ADCY6;GNAI2
Bile secretion	1990-03-01	0.841169	0.0751166	0.999996	0	0	0.644599	0.111491	SLC4A4;ADCY6;ABCG2
Hypertrophic cardiomyopathy	1990-03-01	0.841169	0.0751166	0.999996	0	0	0.644599	0.111491	PRKAB2;CACNB3;ATP2A2
Th1 and Th2 cell differentiation	1992-03-01	0.851732	0.0696969	0.999996	0	0	0.630047	0.101112	CHUK;IKBKG;PLCG1
GnRH signaling pathway	1993-03-01	0.85678	0.0671305	0.999996	0	0	0.623014	0.0963014	CAMK2B;MAPK7;ADCY6
Acute myeloid leukemia	1967-02-01	0.860248	0.0653762	0.999996	0	0	0.575281	0.0865995	CHUK;IKBKG
Calcium signaling pathway	9/240	0.863858	0.0635576	0.999996	0	0	0.727079	0.106406	CAMK2B;SPHK1;PHKG2;PDGFB;VEGFB;ATP2A2;PLCG1;TPCN2;TPCN1
Fc epsilon RI signaling pathway	1968-02-01	0.865803	0.0625807	0.999996	0	0	0.566535	0.0816362	RAC1;PLCG1
Dilated cardiomyopathy	1996-03-01	0.871032	0.0599659	0.999996	0	0	0.602821	0.0832354	CACNB3;ATP2A2;ADCY6
Amphetamine addiction	1969-02-01	0.871155	0.0599045	0.999996	0	0	0.55805	0.0769747	CAMK2B;SIRT1
Phospholipase D signaling pathway	5/148	0.875682	0.0576535	0.999996	0	0	0.652969	0.0866831	SPHK1;PDGFB;PLCG1;ADCY6;AGPAT3
Inflammatory mediator regulation of TRP channels	1998-03-01	0.879823	0.0556047	0.999996	0	0	0.590067	0.075549	CAMK2B;PLCG1;ADCY6
Homologous recombination	1941-01-01	0.881806	0.0546269	0.999996	0	0	0.467572	0.0588126	RAD54L
Osteoclast differentiation	4/127	0.890903	0.0501698	0.999996	0	0	0.607357	0.0701621	CYLD;CHUK;IKBKG;RAC1
Fat digestion and absorption	1943-01-01	0.893511	0.0489003	0.999996	0	0	0.445259	0.0501349	SLC27A1
Fatty acid degradation	1943-01-01	0.893511	0.0489003	0.999996	0	0	0.445259	0.0501349	ACADS
Relaxin signaling pathway	4/129	0.897747	0.0468458	0.999996	0	0	0.597576	0.0644584	GNAI3;VEGFB;ADCY6;GNAI2
Protein digestion and absorption	3/103	0.899508	0.0459948	0.999996	0	0	0.560415	0.0593519	COL16A1;COL5A1;SLC38A2
Pertussis	1976-02-01	0.903439	0.0441013	0.999996	0	0	0.505074	0.0512887	GNAI3;GNAI2
ABC transporters	1945-01-01	0.904057	0.0438042	0.999996	0	0	0.424975	0.0428642	ABCG2
Arrhythmogenic right ventricular cardiomyopathy	1977-02-01	0.907381	0.0422104	0.999996	0	0	0.498314	0.0484326	CACNB3;ATP2A2
Vascular smooth muscle contraction	4/133	0.910311	0.0408101	0.999996	0	0	0.578924	0.0544007	MYL6;ARHGEF12;MYH9;ADCY6
Insulin resistance	3/108	0.91624	0.037991	0.999996	0	0	0.533588	0.0466769	SLC27A1;PRKAB2;OGA
JAK-STAT signaling pathway	5/162	0.918329	0.0370017	0.999996	0	0	0.594301	0.0506342	IL15RA;CDKN1A;PDGFB;STAM;OSMR
Measles	4/139	0.926587	0.0331137	0.999996	0	0	0.553018	0.042166	CHUK;BAX;IKBKG;TLR2
Ovarian steroidogenesis	1951-01-01	0.929837	0.031593	0.999996	0	0	0.37386	0.0271967	ADCY6
cGMP-PKG signaling pathway	5/167	0.930092	0.031474	0.999996	0	0	0.575805	0.0417295	GNAI3;ATP2A2;PRKG2;ADCY6;GNAI2
Signaling pathways regulating pluripotency of stem cells	4/143	0.935908	0.028767	0.999996	0	0	0.53699	0.0355693	KAT6A;FZD6;SMARCAD1;SKIL
Insulin secretion	1986-02-01	0.936655	0.0284204	0.999996	0	0	0.444711	0.0291021	CAMK2B;ADCY6
Gastric cancer	4/149	0.947885	0.0232442	0.999996	0	0	0.514606	0.0275426	CDKN1A;FZD6;BAX;MLH1
Salivary secretion	1993-02-01	0.953111	0.0208566	0.999996	0	0	0.410351	0.0197068	PRKG2;ADCY6
TGF-beta signaling pathway	1994-02-01	0.955098	0.0199519	0.999996	0	0	0.405869	0.018646	TFDP1;SMAD7
Viral myocarditis	1960-01-01	0.95613	0.0194831	0.999996	0	0	0.31668	0.0142068	RAC1
mTOR signaling pathway	4/154	0.95626	0.0194238	0.999996	0	0	0.49732	0.0222426	FLCN;ATP6V1G1;CHUK;FZD6
Cellular senescence	4/156	0.959248	0.0180689	0.999996	0	0	0.490724	0.0204167	CDKN1A;MDM2;RAD1;SIRT1
Aldosterone synthesis and secretion	1998-02-01	0.962272	0.0167023	0.999996	0	0	0.388875	0.0149556	CAMK2B;ADCY6
cAMP signaling pathway	6/216	0.965519	0.0152393	0.999996	0	0	0.5322	0.0186748	CAMK2B;GNAI3;ATP2A2;RAC1;ADCY6;GNAI2
Neutrophil extracellular trap formation	5/189	0.965784	0.01512	0.999996	0	0	0.506367	0.0176292	HDAC10;CR1L;PLCG1;RAC1;TLR2
Cortisol synthesis and secretion	1965-01-01	0.966207	0.01493	0.999996	0	0	0.291862	0.0100335	ADCY6
Inflammatory bowel disease	1965-01-01	0.966207	0.01493	0.999996	0	0	0.291862	0.0100335	TLR2
Long-term potentiation	1967-01-01	0.969557	0.0134267	0.999996	0	0	0.282988	0.00874891	CAMK2B
Drug metabolism	2/108	0.975709	0.0106798	0.999996	0	0	0.352002	0.00865612	GSTO2;TK1
MicroRNAs in cancer	9/310	0.977796	0.00975178	0.999996	0	0	0.555908	0.0124825	RASSF1;CDKN1A;MAPK7;PDGFB;MDM2;MDM4;PLCG1;SIRT1;EZH2
Thyroid hormone synthesis	1975-01-01	0.979952	0.00879536	0.999996	0	0	0.252288	0.00510935	ADCY6
Serotonergic synapse	2/113	0.980557	0.008527	0.999996	0	0	0.336057	0.0065982	GNAI3;GNAI2
Metabolism of xenobiotics by cytochrome P450	1976-01-01	0.980972	0.00834348	0.999996	0	0	0.248911	0.00478197	GSTO2
Breast cancer	3/147	0.981484	0.00811674	0.999996	0	0	0.388271	0.00725658	CDKN1A;FZD6;BAX
Alcoholism	4/186	0.98647	0.00591591	0.999996	0	0	0.409183	0.00557384	HDAC10;GNAI3;SLC29A1;GNAI2
Complement and coagulation cascades	1985-01-01	0.988109	0.00519522	0.999996	0	0	0.222136	0.00265729	CR1L
Taste transduction	1986-01-01	0.988714	0.00492925	0.999996	0	0	0.219511	0.00249145	ADCY6
Natural killer cell mediated cytotoxicity	2/131	0.991379	0.00376048	0.999996	0	0	0.28889	0.00250145	PLCG1;RAC1
Systemic lupus erythematosus	2/135	0.99282	0.00312964	0.999996	0	0	0.280142	0.00201878	SSB;SNRPD1
Chemical carcinogenesis	5/239	0.994182	0.0025339	0.999996	0	0	0.39711	0.00231695	HSP90AB1;GSTO2;GNAI3;ADCY6;GNAI2
Hematopoietic cell lineage	1999-01-01	0.994279	0.0024918	0.999996	0	0	0.190261	0.00109164	CR1L
Viral protein interaction with cytokine and cytokine receptor	1/100	0.99457	0.00236455	0.999996	0	0	0.188329	0.00102537	CCL25
Cell adhesion molecules	1/148	0.999557	0.000192223	0.999996	0	0	0.126512	5.59954e-05	CD99L2
Cytokine-cytokine receptor interaction	4/295	0.999839	6.98911e-05	0.999996	0	0	0.254432	4.09457e-05	CCL25;IL15RA;TNFRSF12A;OSMR
Herpes simplex virus 1 infection	10/498	0.999873	5.5199e-05	0.999996	0	0	0.377547	4.79864e-05	DAXX;CHUK;BAX;IKBKG;SRSF5;EIF2B1;ZFP37;SRSF7;BIRC2;TLR2
Olfactory transduction	2/440	0.999996	1.88306e-06	0.999996	0	0	0.0836898	3.6287e-07	CAMK2B;PRKG2
Neuroactive ligand-receptor interaction	2/341	0.999996	1.87524e-06	0.999996	0	0	0.108707	4.69387e-07	CHRNB1;PARD3

## Sheet: MXE
Term	Overlap	P-value		Adjusted P-value	Old P-value	Old Adjusted P-value	Odds Ratio	Combined Score	Genes
Central carbon metabolism in cancer	1970-11-01	8.01198e-05	4.09626	0.0217926	0	0	4.63297	43.6981	MAP2K1;LDHA;PKM;PIK3R2;SLC1A5;HRAS;MET;FGFR3;FGFR2;GLS;PDK1
Renal cell carcinoma	1969-09-01	0.00141485	2.84929	0.157312	0	0	3.71759	24.3901	EGLN1;MAP2K1;CUL2;RAPGEF1;ARNT;PIK3R2;ELOC;HRAS;MET
Adherens junction	1971-09-01	0.00173506	2.76069	0.157312	0	0	3.5973	22.867	AFDN;FER;YES1;CSNK2A1;CTNND1;CSNK2A2;BAIAP2;MET;RHOA
HIF-1 signaling pathway	11/109	0.00359643	2.44413	0.244557	0	0	2.78356	15.6653	EGLN1;MAP2K1;LDHA;CUL2;PGK1;ARNT;PIK3R2;ENO1;ELOC;ALDOA;PDK1
Mitophagy	1968-08-01	0.00491062	2.30886	0.267138	0	0	3.30026	17.5453	BCL2L13;USP15;CSNK2A1;CSNK2A2;NBR1;FOXO3;HRAS;ATG5
Ribosome	13/158	0.00924665	2.03402	0.373264	0	0	2.22366	10.4145	RPS7;RPL23;RPL35A;RPL9;MRPS18C;MRPL33;RPS16;RPS19;RPS18;MRPL9;RPS2;RPL28;RPS21
Other types of O-glycan biosynthesis	1947-06-01	0.00960606	2.01745	0.373264	0	0	3.61648	16.7999	B4GALT3;B4GALT1;GALNT18;GXYLT2;COLGALT1;GALNT10
Mannose type O-glycan biosynthesis	2023-04-23	0.0113497	1.94502	0.385889	0	0	5.19524	23.2672	B3GALNT2;B4GALT3;B4GALT1;LARGE1
Phosphatidylinositol signaling system	1997-09-01	0.0136387	1.86523	0.412191	0	0	2.53102	10.8703	MTMR2;PIP4P2;PLCB3;DGKD;PPIP5K2;ITPK1;PIP4K2A;PIK3R2;PIK3C2A
Long-term potentiation	1967-07-01	0.0154879	1.81001	0.421271	0	0	2.884	12.0196	PPP1CB;PPP1CC;MAP2K1;PLCB3;GNAQ;CACNA1C;HRAS
Biosynthesis of unsaturated fatty acids	2023-04-27	0.0198945	1.70127	0.452759	0	0	4.29082	16.8085	SCP2;ACOX1;TECR;ELOVL6
Endocytosis	17/252	0.0209047	1.67976	0.452759	0	0	1.79508	6.94299	SH3GLB2;VPS26A;ASAP2;RHOA;RNF41;DNM2;EPN2;DAB2;RABEP1;BIN1;PSD3;RAB11FIP3;HRAS;FGFR3;SNX5;FGFR2;WASHC3
Ubiquitin mediated proteolysis	11/140	0.0216392	1.66476	0.452759	0	0	2.11121	8.0928	UBE2F;COP1;CDC23;PPIL2;UBE2Q2;CUL2;UBA3;UBA1;ELOC;BTRC;DDB2
Dopaminergic synapse	10/132	0.0344575	1.46272	0.576967	0	0	2.02752	6.82875	PPP1CB;ATF2;PPP1CC;PLCB3;PPP2R5E;GNAQ;PPP2R2D;CACNA1C;COMT;CLOCK
Lysine degradation	1963-06-01	0.0361365	1.44205	0.576967	0	0	2.59916	8.63038	KMT2B;EHMT1;PLOD2;PRDM2;COLGALT1;EZH2
Choline metabolism in cancer	1998-08-01	0.038092	1.41917	0.576967	0	0	2.19673	7.17836	MAP2K1;DGKD;SLC22A5;CHKA;SLC44A1;SLC44A2;PIK3R2;HRAS
mRNA surveillance pathway	1998-08-01	0.038092	1.41917	0.576967	0	0	2.19673	7.17836	PPP1CB;PPP1CC;CPSF6;FIP1L1;PPP2R5E;RNMT;PPP2R2D;MSI2
GnRH secretion	1964-06-01	0.0386103	1.4133	0.576967	0	0	2.55421	8.31201	MAP2K1;PLCB3;GNAQ;PIK3R2;CACNA1C;HRAS
Propanoate metabolism	1934-04-01	0.0424836	1.37178	0.576967	0	0	3.28843	10.387	LDHA;ACOX1;BCKDHB;SUCLG2
Sphingolipid signaling pathway	9/119	0.0438288	1.35824	0.576967	0	0	2.02249	6.32525	MAP2K1;PLCB3;PPP2R5E;ROCK2;GNAQ;PPP2R2D;PIK3R2;HRAS;RHOA
Acute myeloid leukemia	1967-06-01	0.0466665	1.331	0.576967	0	0	2.42822	7.44182	CCNA2;MAP2K1;RARA;PIK3R2;HRAS;RUNX1
Glycolysis / Gluconeogenesis	1967-06-01	0.0466665	1.331	0.576967	0	0	2.42822	7.44182	LDHA;PKM;ADPGK;PGK1;ENO1;ALDOA
Proteoglycans in cancer	13/205	0.0597417	1.22372	0.681855	0	0	1.67519	4.72022	MAP2K1;ROCK2;FN1;PIK3R2;RHOA;PPP1CB;PPP1CC;FLNA;FAS;HRAS;MET;CD44;EIF4B
Non-small cell lung cancer	1972-06-01	0.0622523	1.20584	0.681855	0	0	2.24367	6.22969	MAP2K1;PIK3R2;FOXO3;HRAS;MET;DDB2
Various types of N-glycan biosynthesis	1939-04-01	0.0648092	1.18836	0.681855	0	0	2.81792	7.7107	B4GALT3;B4GALT1;TUSC3;MGAT1
Rap1 signaling pathway	13/210	0.0694336	1.15843	0.681855	0	0	1.63224	4.35381	MAGI1;MAP2K1;CTNND1;PIK3R2;RHOA;AFDN;PLCB3;GNAQ;RAPGEF1;HRAS;FGFR3;MET;FGFR2
Adrenergic signaling in cardiomyocytes	10/150	0.070191	1.15372	0.681855	0	0	1.76517	4.68925	PPP1CB;ATF2;PPP1CC;PLCB3;PPP2R5E;GNAQ;TNNT2;PPP2R2D;CREM;CACNA1C
Spliceosome	10/150	0.070191	1.15372	0.681855	0	0	1.76517	4.68925	SNRPD1;SRSF2;PRPF40B;PRPF40A;U2AF1;HNRNPC;TXNL4A;HNRNPA1;SRSF7;LSM2
Endometrial cancer	1958-05-01	0.0757793	1.12045	0.684804	0	0	2.32692	6.0033	MAP2K1;PIK3R2;FOXO3;HRAS;DDB2
Vascular smooth muscle contraction	9/133	0.077194	1.11242	0.684804	0	0	1.79283	4.59221	PPP1CB;PPP1CC;MAP2K1;MYL6;PLCB3;ROCK2;GNAQ;CACNA1C;RHOA
Oxytocin signaling pathway	10/154	0.0804768	1.09433	0.684804	0	0	1.71578	4.3234	PPP1CB;PPP1CC;MAP2K1;MYL6;PLCB3;ROCK2;GNAQ;CACNA1C;HRAS;RHOA
Bacterial invasion of epithelial cells	1977-06-01	0.0805651	1.09385	0.684804	0	0	2.08512	5.25178	ARHGAP10;FN1;PIK3R2;MET;RHOA;DNM2
Regulation of actin cytoskeleton	13/218	0.0869788	1.06059	0.716916	0	0	1.56788	3.82891	MAP2K1;ROCK2;FN1;PIK3R2;BAIAP2;RHOA;SSH1;PPP1CB;PPP1CC;PIP4K2A;HRAS;FGFR3;FGFR2
AMPK signaling pathway	8/120	0.0983933	1.00703	0.787147	0	0	1.7632	4.08847	CCNA2;PFKFB1;SREBF1;PPP2R5E;PPP2R2D;PIK3R2;FOXO3;ELAVL1
Longevity regulating pathway	7/102	0.104728	0.979936	0.803073	0	0	1.81815	4.10244	ATF2;EHMT1;PIK3R2;FOXO3;HRAS;ATG5;APPL1
Salmonella infection	14/249	0.111299	0.953507	0.803073	0	0	1.47253	3.23298	DCTN6;MAP2K1;HSP90AB1;ANXA2;ROCK2;PIK3C2A;RHOA;DNM2;ABI1;FLNA;HRAS;VPS39;ARL8A;VPS16
Thiamine metabolism	2023-02-15	0.11463	0.940701	0.803073	0	0	3.78797	8.2049	AK1;AK5
Circadian rhythm	2023-03-31	0.1195	0.922631	0.803073	0	0	2.63937	5.60718	FBXL3;BTRC;CLOCK
cGMP-PKG signaling pathway	10/167	0.119972	0.920921	0.803073	0	0	1.57264	3.33478	PPP1CB;ATF2;PPP1CC;MAP2K1;PLCB3;ROCK2;GNAQ;CACNA1C;RHOA;GTF2I
Colorectal cancer	1986-06-01	0.120235	0.919968	0.803073	0	0	1.84968	3.91818	MAP2K1;PIK3R2;HRAS;RHOA;APPL1;DDB2
Thermogenesis	13/232	0.123815	0.907227	0.803073	0	0	1.46657	3.06362	SMARCE1;ATF2;KDM3A;KDM3B;COX16;NDUFA5;COX18;COX4I1;NDUFAF6;NDUFAF5;NDUFAF2;NDUFAF1;HRAS
Ether lipid metabolism	1949-04-01	0.124004	0.906564	0.803073	0	0	2.19057	4.5727	GDPD3;CEPT1;PAFAH1B3;PAFAH1B2
N-Glycan biosynthesis	1950-04-01	0.130877	0.883136	0.804709	0	0	2.14284	4.35746	B4GALT3;B4GALT1;TUSC3;MGAT1
Transcriptional misregulation in cancer	11/192	0.133028	0.876057	0.804709	0	0	1.50058	3.02696	CCNA2;SMAD1;SS18;TAF15;EYA1;MAX;RARA;MET;RUNX1;DDB2;ETV6
Purine metabolism	8/129	0.133132	0.875718	0.804709	0	0	1.63128	3.28934	PKM;PDE10A;NME6;AK1;NUDT2;NT5M;AK5;PDE7A
Melanoma	1972-05-01	0.150595	0.82219	0.812449	0	0	1.83936	3.4822	MAP2K1;PIK3R2;HRAS;MET;DDB2
Nicotinate and nicotinamide metabolism	1935-03-01	0.155728	0.807634	0.812449	0	0	2.30897	4.29387	NADK2;NAMPT;NT5M
Inositol phosphate metabolism	1973-05-01	0.156837	0.804551	0.812449	0	0	1.81221	3.35721	PLCB3;MTMR2;ITPK1;PIP4K2A;PIK3C2A
p53 signaling pathway	1973-05-01	0.156837	0.804551	0.812449	0	0	1.81221	3.35721	COP1;CCNG2;FAS;MDM4;DDB2
Focal adhesion	11/201	0.165198	0.781994	0.812449	0	0	1.42882	2.57275	PPP1CB;PPP1CC;MAP2K1;ROCK2;FN1;RAPGEF1;FLNA;PIK3R2;HRAS;MET;RHOA
Estrogen signaling pathway	8/137	0.168566	0.773231	0.812449	0	0	1.52948	2.72312	ATF2;MAP2K1;PLCB3;HSP90AB1;GNAQ;RARA;PIK3R2;HRAS
Insulin signaling pathway	8/137	0.168566	0.773231	0.812449	0	0	1.52948	2.72312	PPP1CB;PPP1CC;SREBF1;MAP2K1;RAPGEF1;FLOT2;PIK3R2;HRAS
African trypanosomiasis	1937-03-01	0.174973	0.757029	0.812449	0	0	2.17292	3.78767	PLCB3;GNAQ;FAS
Thyroid cancer	1937-03-01	0.174973	0.757029	0.812449	0	0	2.17292	3.78767	MAP2K1;HRAS;DDB2
Pyrimidine metabolism	1956-04-01	0.175143	0.756607	0.812449	0	0	1.895	3.30137	NME6;NUDT2;NT5M;UCKL1
Chronic myeloid leukemia	1976-05-01	0.176178	0.754049	0.812449	0	0	1.73537	3.01305	MAP2K1;PIK3R2;HRAS;DDB2;RUNX1
MAPK signaling pathway	15/294	0.178666	0.747959	0.812449	0	0	1.32754	2.28635	ATF2;MAP2K1;MAX;CACNA1C;ECSIT;MAPK8IP3;TAOK1;MAP3K20;FLNA;FAS;HRAS;FGFR3;MET;FGFR2;MAP4K4
D-Glutamine and D-glutamate metabolism	2023-01-05	0.180814	0.742767	0.812449	0	0	6.15045	10.519	GLS
Legionellosis	1957-04-01	0.182971	0.737618	0.812449	0	0	1.85915	3.15763	EEF1A1;CLK1;BCL2L13;CLK4
One carbon pool by folate	2023-02-20	0.183073	0.737376	0.812449	0	0	2.73504	4.64375	MTHFD2L;MTHFR
Growth hormone synthesis, secretion and action	7/119	0.184805	0.733287	0.812449	0	0	1.54081	2.60158	ATF2;MAP2K1;PLCB3;GNAQ;PIK3R2;CACNA1C;HRAS
Glycerophospholipid metabolism	1998-06-01	0.185191	0.732381	0.812449	0	0	1.60741	2.71068	DGKD;CHKA;ETNK1;MBOAT1;CEPT1;CRLS1
Pathways in cancer	25/531	0.195386	0.709107	0.813033	0	0	1.22128	1.99407	HSP90AB1;MAX;ROCK2;CUL2;PIK3R2;ELOC;HRAS;APPL1;EGLN1;IL15RA;MAP2K1;FN1;ARNT;RHOA;DDB2;RUNX1;CCNA2;PLCB3;GNAQ;RARA;FAS;MET;FGFR3;FGFR2;NFE2L2
RNA degradation	1979-05-01	0.196365	0.706935	0.813033	0	0	1.66475	2.70985	CNOT7;PAN3;CNOT2;ENO1;LSM2
Spinocerebellar ataxia	8/143	0.19766	0.70408	0.813033	0	0	1.46104	2.36864	ATXN2;PLCB3;PSMA3;ATXN1;GNAQ;ADRM1;PIK3R2;PUM2
Coronavirus disease	12/232	0.198979	0.701193	0.813033	0	0	1.34579	2.17285	MAVS;RPS16;RPS19;RPS7;RPS18;RPL23;RPL35A;PIK3R2;RPS2;RPL9;RPL28;RPS21
Wnt signaling pathway	9/166	0.202923	0.692668	0.813033	0	0	1.41354	2.2545	TLE4;PLCB3;CSNK2A1;DAAM1;TBL1XR1;ROCK2;CSNK2A2;BTRC;RHOA
Long-term depression	1960-04-01	0.207104	0.683811	0.813033	0	0	1.75927	2.77003	MAP2K1;PLCB3;GNAQ;HRAS
Terpenoid backbone biosynthesis	2023-02-22	0.211873	0.673925	0.813033	0	0	2.46128	3.81934	IDI1;GGPS1
Platelet activation	7/124	0.212173	0.673309	0.813033	0	0	1.47457	2.28611	PPP1CB;PPP1CC;PLCB3;ROCK2;GNAQ;PIK3R2;RHOA
Phosphonate and phosphinate metabolism	2023-01-06	0.212852	0.671921	0.813033	0	0	4.9201	7.61217	CEPT1
Bladder cancer	1941-03-01	0.215215	0.667128	0.813033	0	0	1.94379	2.98589	MAP2K1;HRAS;FGFR3
cAMP signaling pathway	11/216	0.22627	0.645372	0.84309	0	0	1.32323	1.96635	PPP1CB;PPP1CC;AFDN;ABCC4;MAP2K1;PDE10A;ACOX1;ROCK2;PIK3R2;CACNA1C;RHOA
Parathyroid hormone synthesis, secretion and action	6/106	0.234662	0.629557	0.862541	0	0	1.4782	2.14281	ATF2;MAP2K1;PLCB3;NACA;GNAQ;RHOA
Glucagon signaling pathway	6/107	0.241119	0.617769	0.874458	0	0	1.46348	2.08175	ATF2;PFKFB1;LDHA;PLCB3;PKM;GNAQ
Insulin secretion	1986-05-01	0.24622	0.608676	0.880041	0	0	1.52033	2.13078	RIMS2;ATF2;PLCB3;GNAQ;CACNA1C
Cortisol synthesis and secretion	1965-04-01	0.249129	0.603575	0.880041	0	0	1.61465	2.24401	ATF2;PLCB3;GNAQ;CACNA1C
Glycosphingolipid biosynthesis	1945-03-01	0.257142	0.589826	0.890718	0	0	1.7583	2.38799	B4GALT3;B4GALT1;ST3GAL4
Cellular senescence	8/156	0.266763	0.573875	0.890718	0	0	1.3318	1.75983	PPP1CB;CCNA2;PPP1CC;MAP2K1;PIK3R2;BTRC;FOXO3;HRAS
Proteasome	1946-03-01	0.267802	0.572186	0.890718	0	0	1.71732	2.26258	PSMA3;PSME3;ADRM1
Type II diabetes mellitus	1946-03-01	0.267802	0.572186	0.890718	0	0	1.71732	2.26258	PKM;PIK3R2;CACNA1C
PD-L1 expression and PD-1 checkpoint pathway in cancer	1989-05-01	0.268525	0.571015	0.890718	0	0	1.4658	1.92725	MAP2K1;CSNK2A1;CSNK2A2;PIK3R2;HRAS
Hepatitis C	8/157	0.272358	0.56486	0.892547	0	0	1.32279	1.72047	MAP2K1;MAVS;PSME3;PPP2R2D;FAS;PIK3R2;EIF2AK4;HRAS
Cholinergic synapse	6/113	0.280869	0.551496	0.894072	0	0	1.38099	1.75367	MAP2K1;PLCB3;GNAQ;PIK3R2;CACNA1C;HRAS
Amphetamine addiction	1969-04-01	0.283938	0.546777	0.894072	0	0	1.51497	1.90735	PPP1CB;ATF2;PPP1CC;CACNA1C
Fatty acid elongation	2023-02-27	0.285091	0.545016	0.894072	0	0	1.96851	2.47038	TECR;ELOVL6
Yersinia infection	7/137	0.289212	0.538784	0.894072	0	0	1.32621	1.6453	MAP2K1;ROCK2;GNAQ;FN1;PIK3R2;BAIAP2;RHOA
Valine, leucine and isoleucine degradation	1948-03-01	0.289259	0.538714	0.894072	0	0	1.64082	2.03533	ACAD8;AUH;BCKDHB
Prolactin signaling pathway	1970-04-01	0.292756	0.533494	0.894715	0	0	1.49194	1.83272	MAP2K1;PIK3R2;FOXO3;HRAS
GnRH signaling pathway	1993-05-01	0.298897	0.524478	0.899077	0	0	1.39888	1.68937	MAP2K1;PLCB3;GNAQ;CACNA1C;HRAS
Hepatitis B	8/162	0.300794	0.52173	0.899077	0	0	1.27951	1.53711	CCNA2;ATF2;MAP2K1;MAVS;FAS;PIK3R2;HRAS;DDB2
Neurotrophin signaling pathway	6/119	0.321946	0.492217	0.933653	0	0	1.30725	1.4816	MAP2K1;RAPGEF1;PIK3R2;FOXO3;HRAS;RHOA
Pentose phosphate pathway	1930-02-01	0.328852	0.482999	0.933653	0	0	1.75733	1.9544	RPE;ALDOA
Sulfur metabolism	2023-01-10	0.328969	0.482845	0.933653	0	0	2.73282	3.03833	BPNT1
Fc gamma R-mediated phagocytosis	1997-05-01	0.329779	0.481777	0.933653	0	0	1.33778	1.48404	MAP2K1;BIN1;PIK3R2;ASAP2;DNM2
Prostate cancer	1997-05-01	0.329779	0.481777	0.933653	0	0	1.33778	1.48404	MAP2K1;HSP90AB1;PIK3R2;HRAS;FGFR2
Glioma	1975-04-01	0.337267	0.472026	0.933653	0	0	1.38651	1.50697	MAP2K1;PIK3R2;HRAS;DDB2
Inflammatory mediator regulation of TRP channels	1998-05-01	0.337553	0.471658	0.933653	0	0	1.32333	1.43718	PPP1CB;PPP1CC;PLCB3;GNAQ;PIK3R2
Tight junction	8/169	0.34162	0.466457	0.933653	0	0	1.22343	1.31403	MAGI1;AFDN;MYL6;ROCK2;PPP2R2D;ARHGAP17;RHOA;RUNX1
Endocrine and other factor-regulated calcium reabsorption	1953-03-01	0.343255	0.464383	0.933653	0	0	1.47635	1.57864	PLCB3;GNAQ;DNM2
Progesterone-mediated oocyte maturation	5/100	0.35314	0.452053	0.947067	0	0	1.29533	1.3483	CCNA2;MAP2K1;CDC23;HSP90AB1;PIK3R2
Ubiquinone and other terpenoid-quinone biosynthesis	2023-01-11	0.35522	0.449503	0.947067	0	0	2.45941	2.54554	COQ2
Phospholipase D signaling pathway	7/148	0.358632	0.445351	0.947067	0	0	1.22205	1.25316	MAP2K1;PLCB3;DGKD;PIK3R2;HRAS;RHOA;DNM2
Shigellosis	11/246	0.368057	0.434085	0.954176	0	0	1.15249	1.15193	PLCB3;CBX3;ROCK2;PIK3R2;U2AF1;BTRC;FOXO3;RHOA;CD44;MALT1;ATG5
Chagas disease	5/102	0.368758	0.433259	0.954176	0	0	1.26849	1.26547	PLCB3;GNAQ;PPP2R2D;FAS;PIK3R2
Fructose and mannose metabolism	1933-02-01	0.371848	0.429635	0.954176	0	0	1.58701	1.56999	PFKFB1;ALDOA
T cell receptor signaling pathway	5/104	0.384381	0.415238	0.977119	0	0	1.24274	1.18821	MAP2K1;PIK3R2;HRAS;RHOA;MALT1
B cell receptor signaling pathway	1981-04-01	0.390929	0.407902	0.97789	0	0	1.27807	1.2004	MAP2K1;PIK3R2;HRAS;MALT1
Oocyte meiosis	6/129	0.391875	0.406853	0.97789	0	0	1.20034	1.12449	PPP1CB;PPP1CC;MAP2K1;CDC23;PPP2R5E;BTRC
Peroxisome	1982-04-01	0.399833	0.398121	0.979541	0	0	1.26162	1.15653	SCP2;ACOX1;PEX2;HACL1
VEGF signaling pathway	1959-03-01	0.407502	0.38987	0.979541	0	0	1.31776	1.18297	MAP2K1;PIK3R2;HRAS
PI3K-Akt signaling pathway	15/354	0.41221	0.384881	0.979541	0	0	1.08912	0.965201	MAGI1;ATF2;MAP2K1;HSP90AB1;FN1;PIK3R2;OSMR;FOXO3;PPP2R5E;PPP2R2D;HRAS;FGFR3;MET;FGFR2;EIF4B
Mucin type O-glycan biosynthesis	1936-02-01	0.413694	0.38332	0.979541	0	0	1.44676	1.27695	GALNT18;GALNT10
RNA transport	8/186	0.442792	0.3538	0.979541	0	0	1.10559	0.900679	EIF4A2;EEF1A1;SUMO1;EIF4G3;THOC7;EIF4G2;EIF4B;RAN
Cardiac muscle contraction	1987-04-01	0.443931	0.352684	0.979541	0	0	1.18531	0.96257	ASPH;COX4I1;TNNT2;CACNA1C
Autophagy	6/137	0.447788	0.348927	0.979541	0	0	1.12656	0.905121	RUBCN;MAP2K1;PIK3R2;EIF2AK4;HRAS;ATG5
Gap junction	1988-04-01	0.45264	0.344247	0.979541	0	0	1.17113	0.928308	MAP2K1;PLCB3;GNAQ;HRAS
Serotonergic synapse	5/113	0.454119	0.34283	0.979541	0	0	1.13864	0.898836	MAP2K1;PLCB3;GNAQ;CACNA1C;HRAS
Measles	6/139	0.461621	0.335715	0.979541	0	0	1.10951	0.857662	MAVS;CSNK2A1;CSNK2A2;FAS;PIK3R2;EIF2AK4
Leukocyte transendothelial migration	5/114	0.461756	0.335587	0.979541	0	0	1.12813	0.87173	AFDN;ROCK2;CTNND1;PIK3R2;RHOA
Lipid and atherosclerosis	9/215	0.465396	0.332177	0.979541	0	0	1.07454	0.821881	PLCB3;HSP90AB1;ROCK2;MIB2;FAS;PIK3R2;HRAS;RHOA;NFE2L2
Chemokine signaling pathway	8/192	0.478228	0.320365	0.979541	0	0	1.06921	0.788718	MAP2K1;PLCB3;ROCK2;GNAQ;PIK3R2;FOXO3;HRAS;RHOA
Hepatocellular carcinoma	7/168	0.486411	0.312997	0.979541	0	0	1.06912	0.770514	SMARCE1;MAP2K1;PIK3R2;HRAS;MET;NFE2L2;DDB2
Small cell lung cancer	1992-04-01	0.486997	0.312474	0.979541	0	0	1.11767	0.80416	MAX;FN1;PIK3R2;DDB2
Human T-cell leukemia virus 1 infection	9/219	0.487464	0.312057	0.979541	0	0	1.05385	0.757234	CCNA2;ATF2;IL15RA;MAP2K1;CDC23;TSPO;PIK3R2;HRAS;RAN
Signaling pathways regulating pluripotency of stem cells	6/143	0.489005	0.310687	0.979541	0	0	1.07689	0.770386	SMAD1;MAP2K1;PIK3R2;FGFR3;HRAS;FGFR2
Primary bile acid biosynthesis	2023-01-17	0.492531	0.307567	0.979541	0	0	1.53665	1.08825	SCP2
Fc epsilon RI signaling pathway	1968-03-01	0.499748	0.301249	0.979541	0	0	1.13477	0.787134	MAP2K1;PIK3R2;HRAS
Fatty acid degradation	1943-02-01	0.505397	0.296367	0.979541	0	0	1.19931	0.818423	ACADVL;ACOX1
Pathogenic Escherichia coli infection	8/197	0.507332	0.294708	0.979541	0	0	1.04065	0.706172	MYO1D;MYO1B;ROCK2;ABI1;FAS;TMBIM6;BAIAP2;RHOA
Renin secretion	1969-03-01	0.509557	0.292807	0.979541	0	0	1.11752	0.753444	PLCB3;GNAQ;CACNA1C
RIG-I-like receptor signaling pathway	1970-03-01	0.519265	0.284611	0.979541	0	0	1.10078	0.721387	MAVS;TRIM25;ATG5
Human cytomegalovirus infection	9/225	0.520112	0.283903	0.979541	0	0	1.02426	0.669567	ATF2;PLCB3;MAP2K1;ROCK2;GNAQ;FAS;PIK3R2;HRAS;RHOA
Gastric cancer	6/149	0.529182	0.276395	0.979541	0	0	1.03138	0.656392	MAP2K1;PIK3R2;HRAS;MET;FGFR2;DDB2
Basal transcription factors	1945-02-01	0.529844	0.275852	0.979541	0	0	1.14341	0.726264	TAF15;GTF2I
Glycosaminoglycan degradation	2023-01-19	0.531472	0.274519	0.979541	0	0	1.36577	0.863309	IDUA
Cell cycle	5/124	0.536037	0.270805	0.979541	0	0	1.03279	0.644	CCNA2;WEE1;CDC23;TFDP1;TFDP2
Aldosterone synthesis and secretion	1998-04-01	0.536777	0.270206	0.979541	0	0	1.046	0.650793	ATF2;PLCB3;GNAQ;CACNA1C
Steroid biosynthesis	2023-01-20	0.549809	0.259788	0.979541	0	0	1.29382	0.773942	FDFT1
AGE-RAGE signaling pathway in diabetic complications	4/100	0.552824	0.257413	0.979541	0	0	1.0241	0.606999	PLCB3;FN1;PIK3R2;HRAS
Carbohydrate digestion and absorption	1947-02-01	0.553454	0.256918	0.979541	0	0	1.09248	0.646284	PLCB3;PIK3R2
Pyruvate metabolism	1947-02-01	0.553454	0.256918	0.979541	0	0	1.09248	0.646284	LDHA;PKM
Melanogenesis	4/101	0.560737	0.251241	0.979541	0	0	1.01349	0.586307	MAP2K1;PLCB3;GNAQ;HRAS
mTOR signaling pathway	6/154	0.561638	0.250544	0.979541	0	0	0.996273	0.574749	MAP2K1;PIK3R2;DEPDC5;HRAS;RHOA;EIF4B
Amino sugar and nucleotide sugar metabolism	1948-02-01	0.564941	0.247997	0.979541	0	0	1.06867	0.610248	AMDHD2;UAP1L1
NOD-like receptor signaling pathway	7/181	0.565593	0.247496	0.979541	0	0	0.988565	0.563364	MAVS;PLCB3;HSP90AB1;NAMPT;ERBIN;RHOA;ATG5
Thyroid hormone synthesis	1975-03-01	0.566173	0.247051	0.979541	0	0	1.02407	0.582547	ATF2;PLCB3;GNAQ
Pantothenate and CoA biosynthesis	2023-01-21	0.567429	0.246088	0.979541	0	0	1.22907	0.696437	PPCDC
Cushing syndrome	6/155	0.568002	0.24565	0.979541	0	0	0.989535	0.559712	ATF2;MAP2K1;PLCB3;GNAQ;ARNT;CACNA1C
Amoebiasis	4/102	0.568573	0.245214	0.979541	0	0	1.0031	0.566374	PLCB3;GNAQ;FN1;PIK3R2
Pancreatic secretion	4/102	0.568573	0.245214	0.979541	0	0	1.0031	0.566374	PLCB3;GNAQ;SLC4A2;RHOA
Relaxin signaling pathway	5/129	0.571379	0.243076	0.979541	0	0	0.990887	0.554602	ATF2;MAP2K1;PLCB3;PIK3R2;HRAS
Gastric acid secretion	1976-03-01	0.575212	0.240172	0.979541	0	0	1.00999	0.558539	PLCB3;GNAQ;SLC4A2
Pancreatic cancer	1976-03-01	0.575212	0.240172	0.979541	0	0	1.00999	0.558539	MAP2K1;PIK3R2;DDB2
Sphingolipid metabolism	1949-02-01	0.576214	0.239416	0.979541	0	0	1.04588	0.57657	SMPD4;ACER3
C-type lectin receptor signaling pathway	4/104	0.584008	0.233581	0.979541	0	0	0.982931	0.528659	PIK3R2;HRAS;RHOA;MALT1
NF-kappa B signaling pathway	4/104	0.584008	0.233581	0.979541	0	0	0.982931	0.528659	CSNK2A1;CSNK2A2;TRIM25;MALT1
Arginine biosynthesis	2023-01-22	0.584361	0.233319	0.979541	0	0	1.17048	0.628824	GLS
Alzheimer disease	14/369	0.5844	0.23329	0.979541	0	0	0.968611	0.520308	MAP2K1;CSNK2A1;NDUFA5;COX4I1;CSNK2A2;ADRM1;PIK3R2;CACNA1C;RTN4;PLCB3;PSMA3;GNAQ;FAS;HRAS
FoxO signaling pathway	5/131	0.585118	0.232756	0.979541	0	0	0.975057	0.522573	MAP2K1;CCNG2;PIK3R2;FOXO3;HRAS
Arginine and proline metabolism	1950-02-01	0.587271	0.231161	0.979541	0	0	1.02404	0.545063	P4HA1;P4HA2
Human immunodeficiency virus 1 infection	8/212	0.590993	0.228417	0.979541	0	0	0.963368	0.506684	MAP2K1;WEE1;GNAQ;FAS;PIK3R2;ELOC;BTRC;HRAS
Synaptic vesicle cycle	1978-03-01	0.592933	0.226994	0.979541	0	0	0.982953	0.513763	UNC13A;TCIRG1;DNM2
Proximal tubule bicarbonate reclamation	2023-01-23	0.60063	0.221393	0.979541	0	0	1.11722	0.56953	GLS
Insulin resistance	4/108	0.613897	0.211904	0.979541	0	0	0.944928	0.461057	PPP1CB;PPP1CC;SREBF1;PIK3R2
Hippo signaling pathway	6/163	0.617211	0.209566	0.979541	0	0	0.938719	0.452973	PPP1CB;PPP1CC;SMAD1;PPP2R2D;BTRC;TEAD1
Glycosaminoglycan biosynthesis	1953-02-01	0.619151	0.208203	0.979541	0	0	0.96365	0.46198	B4GALT3;B4GALT1
Apelin signaling pathway	5/137	0.624853	0.204222	0.979541	0	0	0.930443	0.43753	HDAC5;MAP2K1;PLCB3;GNAQ;HRAS
alpha-Linolenic acid metabolism	2023-01-25	0.631285	0.199774	0.979541	0	0	1.02401	0.471041	ACOX1
Fluid shear stress and atherosclerosis	5/139	0.637579	0.195466	0.979541	0	0	0.91646	0.412478	HSP90AB1;SUMO1;PIK3R2;RHOA;NFE2L2
TNF signaling pathway	4/112	0.642417	0.192183	0.979541	0	0	0.90974	0.402576	ATF2;MAP2K1;FAS;PIK3R2
Folate biosynthesis	2023-01-26	0.64572	0.189956	0.979541	0	0	0.982996	0.429952	PTS
Glycosylphosphatidylinositol (GPI)-anchor biosynthesis	2023-01-26	0.64572	0.189956	0.979541	0	0	0.982996	0.429952	PIGL
ErbB signaling pathway	1985-03-01	0.651077	0.186368	0.979541	0	0	0.898713	0.385663	MAP2K1;PIK3R2;HRAS
Glutamatergic synapse	4/114	0.656148	0.182998	0.979541	0	0	0.893106	0.376327	PLCB3;GNAQ;CACNA1C;GLS
Apoptosis	5/142	0.65616	0.18299	0.979541	0	0	0.896251	0.377636	MAP2K1;FAS;PIK3R2;PTPN13;HRAS
Collecting duct acid secretion	2023-01-27	0.65959	0.180726	0.979541	0	0	0.945139	0.393307	TCIRG1
Protein processing in endoplasmic reticulum	6/171	0.663102	0.17842	0.979541	0	0	0.89283	0.366798	NSFL1C;HSP90AB1;TUSC3;BAG1;EIF2AK4;NFE2L2
MicroRNAs in cancer	11/310	0.67138	0.173031	0.979541	0	0	0.902745	0.359671	HDAC5;MAP2K1;PIK3R2;MDM4;HRAS;FGFR3;MET;RHOA;CD44;GLS;EZH2
Notch signaling pathway	1959-02-01	0.677147	0.169317	0.979541	0	0	0.861943	0.336043	TLE4;ATXN1
Epstein-Barr virus infection	7/202	0.679983	0.167502	0.979541	0	0	0.881132	0.339841	CCNA2;MAVS;ADRM1;FAS;PIK3R2;CD44;DDB2
Viral carcinogenesis	7/203	0.684927	0.164356	0.979541	0	0	0.87659	0.331739	CCNA2;ATF2;HDAC5;PKM;PIK3R2;HRAS;RHOA
Mineral absorption	1960-02-01	0.686082	0.163624	0.979541	0	0	0.847038	0.319129	TRPM6;ATOX1
Viral myocarditis	1960-02-01	0.686082	0.163624	0.979541	0	0	0.847038	0.319129	EIF4G3;EIF4G2
Ras signaling pathway	8/232	0.690531	0.160817	0.979541	0	0	0.87643	0.324537	AFDN;MAP2K1;PIK3R2;HRAS;FGFR3;MET;RHOA;FGFR2
Glycerolipid metabolism	1961-02-01	0.694812	0.158133	0.979541	0	0	0.832638	0.303175	DGKD;MBOAT1
Citrate cycle (TCA cycle)	2023-01-30	0.698031	0.156125	0.979541	0	0	0.847234	0.304574	SUCLG2
Glyoxylate and dicarboxylate metabolism	2023-01-30	0.698031	0.156125	0.979541	0	0	0.847234	0.304574	GCSH
beta-Alanine metabolism	2023-01-30	0.698031	0.156125	0.979541	0	0	0.847234	0.304574	ACOX1
Thyroid hormone signaling pathway	4/121	0.701364	0.154056	0.979541	0	0	0.839365	0.297746	MAP2K1;PLCB3;PIK3R2;HRAS
Galactose metabolism	2023-01-31	0.709856	0.14883	0.979541	0	0	0.81895	0.280649	B4GALT1
RNA polymerase	2023-01-31	0.709856	0.14883	0.979541	0	0	0.81895	0.280649	POLR1D
Salivary secretion	1993-03-01	0.709963	0.148764	0.979541	0	0	0.818485	0.280366	PLCB3;GNAQ;SLC4A2
Cytosolic DNA-sensing pathway	1963-02-01	0.71167	0.147721	0.979541	0	0	0.805254	0.2739	MAVS;POLR1D
TGF-beta signaling pathway	1994-03-01	0.716758	0.144628	0.979541	0	0	0.809449	0.26956	SMAD1;TFDP1;RHOA
Axon guidance	6/182	0.720284	0.142496	0.979541	0	0	0.836545	0.274478	ROCK2;PIK3R2;HRAS;MET;RHOA;SSH1
Non-alcoholic fatty liver disease	5/155	0.72939	0.13704	0.979541	0	0	0.818018	0.258123	SREBF1;NDUFA5;COX4I1;FAS;PIK3R2
SNARE interactions in vesicular transport	1933-01-01	0.732136	0.135408	0.979541	0	0	0.767686	0.239356	VTI1A
Circadian entrainment	1997-03-01	0.736402	0.132885	0.979541	0	0	0.783492	0.239732	PLCB3;GNAQ;CACNA1C
Alcoholism	6/186	0.73932	0.131168	0.979541	0	0	0.817784	0.246991	PPP1CB;ATF2;PPP1CC;HDAC5;MAP2K1;HRAS
Lysosome	4/128	0.742133	0.129518	0.979541	0	0	0.791691	0.236103	LAPTM4A;IDUA;AP4E1;TCIRG1
Pentose and glucuronate interconversions	1934-01-01	0.742626	0.12923	0.979541	0	0	0.744384	0.2215	RPE
Prion disease	9/273	0.744737	0.127997	0.979541	0	0	0.835911	0.246363	ATF2;PSMA3;CSNK2A1;NDUFA5;COX4I1;CSNK2A2;ADRM1;PIK3R2;CACNA1C
Human papillomavirus infection	11/331	0.750551	0.12462	0.979541	0	0	0.842566	0.241772	MAGI1;CCNA2;MAP2K1;PKM;PPP2R5E;PPP2R2D;FN1;FAS;PIK3R2;TCIRG1;HRAS
Natural killer cell mediated cytotoxicity	4/131	0.75826	0.120182	0.979541	0	0	0.772868	0.213875	MAP2K1;FAS;PIK3R2;HRAS
Tyrosine metabolism	1936-01-01	0.762393	0.117821	0.979541	0	0	0.701774	0.190387	COMT
Pathways of neurodegeneration	16/475	0.764243	0.116769	0.979541	0	0	0.853666	0.229525	DCTN6;MAP2K1;CSNK2A1;NDUFA5;COX4I1;CSNK2A2;ADRM1;CACNA1C;PLCB3;PSMA3;ATXN2;ATXN1;GNAQ;FAS;UBA1;HRAS
Epithelial cell signaling in Helicobacter pylori infection	1970-02-01	0.764619	0.116555	0.979541	0	0	0.722097	0.193794	TCIRG1;MET
Alanine, aspartate and glutamate metabolism	1937-01-01	0.7717	0.112552	0.979541	0	0	0.682245	0.17681	GLS
Aldosterone-regulated sodium reabsorption	1937-01-01	0.7717	0.112552	0.979541	0	0	0.682245	0.17681	PIK3R2
Allograft rejection	1938-01-01	0.780643	0.107548	0.979541	0	0	0.663771	0.164375	FAS
PPAR signaling pathway	1974-02-01	0.790923	0.101866	0.979541	0	0	0.681838	0.159928	SCP2;ACOX1
Th17 cell differentiation	3/107	0.79415	0.100098	0.979541	0	0	0.707786	0.163133	HSP90AB1;RARA;RUNX1
Glycine, serine and threonine metabolism	1940-01-01	0.797493	0.0982731	0.979541	0	0	0.629666	0.142482	GCSH
Ribosome biogenesis in eukaryotes	3/108	0.7993	0.0972903	0.979541	0	0	0.701009	0.157039	CSNK2A1;CSNK2A2;RAN
Ferroptosis	1941-01-01	0.805427	0.0939739	0.979541	0	0	0.613892	0.132836	ATG5
Homologous recombination	1941-01-01	0.805427	0.0939739	0.979541	0	0	0.613892	0.132836	XRCC2
Influenza A	5/172	0.807161	0.0930399	0.979541	0	0	0.734092	0.157266	MAP2K1;MAVS;TRIM25;FAS;PIK3R2
Diabetic cardiomyopathy	6/203	0.809816	0.0916138	0.979541	0	0	0.746546	0.157483	PPP1CB;PPP1CC;PLCB3;NDUFA5;COX4I1;PIK3R2
Graft-versus-host disease	1942-01-01	0.81305	0.0898826	0.979541	0	0	0.598888	0.123947	FAS
Antigen processing and presentation	1978-02-01	0.8146	0.0890558	0.979541	0	0	0.645816	0.13243	HSP90AB1;PSME3
Type I diabetes mellitus	1943-01-01	0.820375	0.0859874	0.979541	0	0	0.584599	0.115747	FAS
Vasopressin-regulated water reabsorption	1944-01-01	0.827414	0.0822773	0.979541	0	0	0.570973	0.108171	DCTN6
Chemical carcinogenesis	7/239	0.829831	0.0810102	0.979541	0	0	0.739166	0.137879	ATF2;MAP2K1;HSP90AB1;ARNT;PIK3R2;CACNA1C;HRAS
Breast cancer	4/147	0.83133	0.0802267	0.979541	0	0	0.685818	0.12669	MAP2K1;PIK3R2;HRAS;DDB2
Calcium signaling pathway	7/240	0.832959	0.0793766	0.979541	0	0	0.735955	0.134511	PLCB3;ASPH;GNAQ;CACNA1C;FGFR3;MET;FGFR2
ABC transporters	1945-01-01	0.834177	0.078742	0.979541	0	0	0.557968	0.101165	ABCC4
Retrograde endocannabinoid signaling	4/148	0.835215	0.0782015	0.979541	0	0	0.68102	0.122628	PLCB3;NDUFA5;GNAQ;CACNA1C
Nucleotide excision repair	1947-01-01	0.846919	0.0721582	0.979541	0	0	0.533653	0.0886666	DDB2
Intestinal immune network for IgA production	1948-01-01	0.852918	0.0690926	0.979541	0	0	0.522271	0.0830889	IL15RA
Taste transduction	1986-02-01	0.854874	0.068098	0.979541	0	0	0.584066	0.0915824	PLCB3;CACNA1C
Cocaine addiction	1949-01-01	0.858683	0.0661672	0.979541	0	0	0.511364	0.0779091	ATF2
ECM-receptor interaction	1988-02-01	0.863612	0.0636815	0.979541	0	0	0.570423	0.0836424	FN1;CD44
Cholesterol metabolism	1950-01-01	0.864222	0.0633747	0.979541	0	0	0.500902	0.0730944	TSPO
Cysteine and methionine metabolism	1950-01-01	0.864222	0.0633747	0.979541	0	0	0.500902	0.0730944	LDHA
Malaria	1950-01-01	0.864222	0.0633747	0.979541	0	0	0.500902	0.0730944	MET
Vibrio cholerae infection	1950-01-01	0.864222	0.0633747	0.979541	0	0	0.500902	0.0730944	TCIRG1
GABAergic synapse	1989-02-01	0.867797	0.0615816	0.979541	0	0	0.563837	0.0799504	CACNA1C;GLS
Bile secretion	1990-02-01	0.871865	0.0595508	0.979541	0	0	0.557401	0.0764312	ABCC4;SLC4A2
Hypertrophic cardiomyopathy	1990-02-01	0.871865	0.0595508	0.979541	0	0	0.557401	0.0764312	TNNT2;CACNA1C
Morphine addiction	1991-02-01	0.875817	0.0575866	0.979541	0	0	0.551109	0.073076	PDE10A;PDE7A
Autoimmune thyroid disease	1953-01-01	0.879571	0.0557289	0.979541	0	0	0.471929	0.0605582	FAS
JAK-STAT signaling pathway	4/162	0.882165	0.0544504	0.979541	0	0	0.620221	0.0777612	IL15RA;PIK3R2;OSMR;HRAS
Fanconi anemia pathway	1954-01-01	0.884293	0.053404	0.979541	0	0	0.463001	0.0569339	POLN
IL-17 signaling pathway	1994-02-01	0.887008	0.0520723	0.979541	0	0	0.533055	0.0639138	HSP90AB1;ELAVL1
Regulation of lipolysis in adipocytes	1955-01-01	0.888829	0.0511818	0.979541	0	0	0.454403	0.0535516	PIK3R2
Hedgehog signaling pathway	1956-01-01	0.893188	0.0490573	0.979541	0	0	0.446118	0.0503928	BTRC
Dilated cardiomyopathy	1996-02-01	0.893942	0.0486907	0.979541	0	0	0.521658	0.0584854	TNNT2;CACNA1C
Oxidative phosphorylation	3/133	0.896712	0.047347	0.979541	0	0	0.565459	0.0616466	NDUFA5;COX4I1;TCIRG1
Steroid hormone biosynthesis	1961-01-01	0.912551	0.039743	0.988312	0	0	0.408835	0.0374132	COMT
Protein digestion and absorption	2/103	0.915211	0.0384787	0.988312	0	0	0.485326	0.0430001	COL5A1;SLC1A5
Toll-like receptor signaling pathway	2/104	0.917901	0.0372042	0.988312	0	0	0.480543	0.0411661	MAP2K1;PIK3R2
Basal cell carcinoma	1963-01-01	0.919276	0.0365543	0.988312	0	0	0.395605	0.0332978	DDB2
Parkinson disease	6/249	0.927485	0.0326933	0.989736	0	0	0.603761	0.0454506	PSMA3;NDUFA5;COX4I1;ADRM1;UBA1;NFE2L2
Drug metabolism	2/108	0.927878	0.0325093	0.989736	0	0	0.462313	0.0346066	NME6;UCKL1
Neutrophil extracellular trap formation	4/189	0.940831	0.0264885	0.993964	0	0	0.528952	0.0322618	HDAC5;MAP2K1;PLCB3;PIK3R2
Kaposi sarcoma-associated herpesvirus infection	4/193	0.946792	0.0237454	0.993964	0	0	0.517648	0.0283028	MAP2K1;FAS;PIK3R2;HRAS
Amyotrophic lateral sclerosis	9/364	0.949536	0.0224884	0.993964	0	0	0.618651	0.0320346	DCTN6;PSMA3;ATXN2;NDUFA5;COX4I1;ADRM1;MATR3;HNRNPA1;SRSF7
Pertussis	1976-01-01	0.952023	0.0213526	0.993964	0	0	0.326812	0.0160681	RHOA
Arrhythmogenic right ventricular cardiomyopathy	1977-01-01	0.953906	0.0204945	0.993964	0	0	0.322495	0.0152186	CACNA1C
Leishmaniasis	1977-01-01	0.953906	0.0204945	0.993964	0	0	0.322495	0.0152186	EEF1A1
Huntington disease	7/306	0.957422	0.0188967	0.993964	0	0	0.571509	0.0248671	DCTN6;PLCB3;PSMA3;NDUFA5;GNAQ;COX4I1;ADRM1
Osteoclast differentiation	2/127	0.96149	0.0170554	0.994392	0	0	0.391651	0.0153807	MAP2K1;PIK3R2
Tuberculosis	3/180	0.973791	0.0115344	0.999995	0	0	0.414286	0.011003	TCIRG1;RHOA;MALT1
Rheumatoid arthritis	1993-01-01	0.975716	0.0106765	0.999995	0	0	0.266186	0.00654377	TCIRG1
Hematopoietic cell lineage	1999-01-01	0.980906	0.00837243	0.999995	0	0	0.249811	0.00481591	CD44
Necroptosis	2/159	0.987082	0.00564659	0.999995	0	0	0.311302	0.00404746	HSP90AB1;FAS
Systemic lupus erythematosus	1/135	0.995494	0.00196125	0.999995	0	0	0.182353	0.000823496	SNRPD1
Herpes simplex virus 1 infection	9/498	0.997706	0.000997424	0.999995	0	0	0.445932	0.00102415	PPP1CB;PPP1CC;MAVS;ZFP57;SRSF2;FAS;PIK3R2;EIF2AK4;SRSF7
Phagosome	1/152	0.997723	0.000990097	0.999995	0	0	0.161679	0.000368594	TCIRG1
Cytokine-cytokine receptor interaction	3/295	0.999378	0.000270352	0.999995	0	0	0.249609	0.000155384	IL15RA;FAS;OSMR
Neuroactive ligand-receptor interaction	1/341	0.999995	2.06731e-06	0.999995	0	0	0.0710929	3.38414e-07	TSPO

## Sheet: RI
Term	Overlap	P-value		Adjusted P-value	Old P-value	Old Adjusted P-value	Odds Ratio	Combined Score	Genes
RNA degradation	18/79	4.09879e-05	4.38734	0.0119685	0	0	3.41598	34.5091	PABPC4;WDR61;CNOT10;ENO2;LSM5;ENO3;EDC4;PAN2;CNOT6;LSM7;EXOSC10;PAN3;EXOSC9;XRN2;CNOT3;SKIV2L;PABPC1;EXOSC2
Ribosome	27/158	0.000138296	3.85919	0.0132385	0	0	2.39045	21.2418	RPL4;MRPS17;RPL3;RPL31;RPL12;RPLP0;RPL11;RPL10A;RPL7;MRPL33;RPS4X;RPL7A;RPS19;RPS18;RPS2;RPS9;RPL23;RPS5;MRPS2;RPL13A;RPL23A;MRPL22;RPS27;RPL27A;RPL22L1;RPL29;RPS21
Base excision repair	1933-10-01	0.000176372	3.75357	0.0132385	0	0	5.0183	43.3727	MBD4;PARP3;PARP2;POLD1;APEX1;POLD2;XRCC1;NEIL1;POLE;MUTYH
Notch signaling pathway	14/59	0.00018135	3.74148	0.0132385	0	0	3.59561	30.9764	JAG2;TLE3;TLE2;HDAC2;TLE1;JAG1;RFNG;APH1A;KAT2B;KAT2A;NCSTN;ATXN1L;DVL1;DVL3
Non-small cell lung cancer	15/72	0.000494345	3.30597	0.0288697	0	0	3.04132	23.1514	STAT5B;MAP2K1;MAP2K2;GADD45A;ARAF;PIK3R2;FOXO3;DDB2;AKT2;AKT1;PLCG1;RAF1;JAK3;MET;MAPK3
Chronic myeloid leukemia	15/76	0.000898026	3.04671	0.0409062	0	0	2.84127	19.9324	STAT5B;MAP2K1;HDAC2;CDKN1B;MAP2K2;GADD45A;ARAF;PIK3R2;RELA;DDB2;AKT2;MDM2;AKT1;RAF1;MAPK3
Human papillomavirus infection	43/331	0.00113471	2.94512	0.0409062	0	0	1.7344	11.7616	LAMA5;HDAC2;CDKN1B;ITGA2B;PXN;UBR4;PIK3R2;CHD4;RFNG;TCIRG1;RELA;THBS3;PPP2R3C;AKT2;DVL1;AKT1;DVL3;ATP6V1C1;ATP6V0A1;MAPK3;HES6;ATP6V0B;MAP2K1;JAG1;MAP2K2;ITGA3;LAMB2;STAT2;FN1;PPP2R5B;TSC2;SCRIB;PPP2R3A;CCNE2;NFX1;TADA3;MDM2;ATP6V1B2;ITGA5;RAF1;LLGL1;LLGL2;ATR
Central carbon metabolism in cancer	14/70	0.00114953	2.93948	0.0409062	0	0	2.88759	19.5444	MAP2K1;MAP2K2;GLS2;SIRT6;PIK3R2;SLC1A5;LDHA;AKT2;AKT1;RAF1;MET;FGFR3;PDK1;MAPK3
Lysine degradation	13/63	0.00126081	2.89935	0.0409062	0	0	3.00219	20.0426	KMT2D;KMT2A;SETDB1;PHYKPL;EHMT2;SUV39H1;KMT2B;PLOD3;DLST;SMYD2;KMT5B;COLGALT1;EZH2
Cellular senescence	24/156	0.00147609	2.83089	0.0431019	0	0	2.10462	13.7187	MAP2K1;MAP2K2;LIN37;GADD45A;TSC2;ITPR3;PIK3R2;FOXO3;FOXM1;CDC25A;RELA;PPP1CC;MAPK11;CCNE2;AKT2;TRPV4;MDM2;AKT1;E2F4;RAF1;PPID;ATR;RAD9A;MAPK3
Viral carcinogenesis	29/203	0.00166682	2.77811	0.0442464	0	0	1.93092	12.3518	HDAC5;VAC14;GTF2A2;HDAC2;CDKN1B;HDAC3;HDAC10;HDAC11;PXN;UBR4;PIK3R2;CHD4;RELA;GTF2E2;HDAC6;HDAC7;JAK3;MAPK3;STAT5B;RANBP1;USP7;GSN;SCRIB;NFKB2;KAT2B;KAT2A;HNRNPK;CCNE2;MDM2
VEGF signaling pathway	1959-12-01	0.00217876	2.66179	0.0530164	0	0	2.94677	18.0607	MAPK11;MAP2K1;MAP2K2;SPHK2;AKT2;PLA2G4B;PXN;AKT1;PIK3R2;PLCG1;RAF1;MAPK3
Sphingolipid signaling pathway	19/119	0.00286637	2.54267	0.0542785	0	0	2.19622	12.8582	MAP2K1;CERS5;ASAH1;MAP2K2;SPHK2;ROCK2;PPP2R5B;PIK3R2;PPP2R3A;RELA;PLD2;MAPK11;PLCB3;PPP2R3C;AKT2;AKT1;RAF1;CERS1;MAPK3
Lysosome	20/128	0.00292393	2.53403	0.0542785	0	0	2.14098	12.4923	CTSA;ARSA;ABCA2;ATP6V0B;ASAH1;IDUA;GAA;AP3D1;CTSW;TCIRG1;MCOLN1;AP4M1;GGA3;AP1G2;MAN2B1;TPP1;ACP2;CTSF;CD68;ATP6V0A1
Yersinia infection	21/137	0.00295347	2.52967	0.0542785	0	0	2.0934	12.1936	ACTR3;MAP2K1;MAP2K2;ROCK2;WIPF2;ARPC1B;PXN;FN1;PIK3R2;BAIAP2;RELA;MAPK11;IRAK1;AKT2;AKT1;ELMO2;PLCG1;ITGA5;ARHGEF7;LAT;MAPK3
Renal cell carcinoma	13/69	0.00297416	2.52664	0.0542785	0	0	2.67965	15.5896	MAP2K1;MAP2K2;TFE3;ARAF;ARNT;PIK3R2;FLCN;AKT2;RAPGEF1;AKT1;RAF1;MET;MAPK3
Homologous recombination	1941-09-01	0.00444464	2.35216	0.0713237	0	0	3.24258	17.562	MUS81;TOP3B;RAD52;ABRAXAS1;POLD1;POLD2;RAD54L;RPA2;TOPBP1
Choline metabolism in cancer	16/98	0.00474484	2.32378	0.0713237	0	0	2.25338	12.0571	MAP2K1;DGKD;MAP2K2;CHKB;CHKA;SLC44A2;PLA2G4B;TSC2;PIK3R2;PLD2;AKT2;DGKQ;AKT1;PLCG1;RAF1;MAPK3
mRNA surveillance pathway	16/98	0.00474484	2.32378	0.0713237	0	0	2.25338	12.0571	CPSF4;CPSF7;SMG1;CPSF1;PABPC4;PPP2R5B;PPP2R3A;SMG7;SRRM1;PPP1CC;DDX39B;PABPN1;PPP2R3C;SYMPK;RNPS1;PABPC1
Glucagon signaling pathway	17/107	0.00488519	2.31112	0.0713237	0	0	2.18182	11.6106	CRTC2;CAMK2D;PRKAG1;ITPR3;PPP4R3B;CPT1C;PHKA2;GYS1;LDHA;PLCB3;PPP4C;AKT2;PHKG2;AKT1;SIK1;SIK2;PCK2
Endometrial cancer	1958-11-01	0.00574694	2.24056	0.0732681	0	0	2.69951	13.927	MAP2K1;MAP2K2;GADD45A;AKT2;ARAF;AKT1;PIK3R2;RAF1;FOXO3;DDB2;MAPK3
Progesterone-mediated oocyte maturation	16/100	0.00579634	2.23685	0.0732681	0	0	2.19948	11.3285	MAP2K1;ARAF;ADCY3;PIK3R2;KIF22;CDC25C;CDC25A;ADCY6;CDC25B;AURKA;MAPK11;CDC23;AKT2;AKT1;RAF1;MAPK3
Small cell lung cancer	15/92	0.00621542	2.20653	0.0732681	0	0	2.24891	11.4261	LAMA5;ZBTB17;CDKN1B;ITGA3;GADD45A;LAMB2;ITGA2B;FN1;PIK3R2;RELA;DDB2;CCNE2;TRAF4;AKT2;AKT1
Glioma	13/75	0.00623589	2.2051	0.0732681	0	0	2.41954	12.285	MAP2K1;CAMK2D;MAP2K2;GADD45A;ARAF;PIK3R2;DDB2;AKT2;MDM2;AKT1;PLCG1;RAF1;MAPK3
Coronavirus disease	30/232	0.00627295	2.20253	0.0732681	0	0	1.71907	8.71827	RPL4;RPL3;RPL31;RPL12;RPLP0;RPL11;PIK3R2;RPL10A;RELA;RPL7;RPS4X;RPL7A;RPS19;IRAK1;RPS18;PLCG1;RPS2;MAPK3;RPS9;RPL23;STAT2;RPS5;RPL13A;RPL23A;MAPK11;RPS27;RPL27A;RPL22L1;RPL29;RPS21
Thyroid hormone signaling pathway	18/121	0.00772394	2.11216	0.0867458	0	0	2.01842	9.81647	MAP2K1;HDAC2;MAP2K2;HDAC3;TSC2;PIK3R2;SLC9A1;MED13L;KAT2B;KAT2A;PLCB3;MED24;AKT2;MDM2;AKT1;PLCG1;RAF1;MAPK3
Spliceosome	21/150	0.00851572	2.06978	0.092096	0	0	1.8811	8.96504	TCERG1;DDX5;RBM25;DDX46;THOC1;PRPF40B;LSM5;CHERP;U2AF1L4;HNRNPM;XAB2;LSM7;HNRNPK;DDX39B;SNRNP70;SRSF5;HNRNPC;HNRNPA1;SRSF7;SF3B1;BCAS2
Prolactin signaling pathway	1970-12-01	0.00918384	2.03698	0.0957743	0	0	2.38647	11.1933	STAT5B;MAPK11;MAP2K1;MAP2K2;GALT;AKT2;AKT1;PIK3R2;RAF1;FOXO3;RELA;MAPK3
Fanconi anemia pathway	1954-10-01	0.0097937	2.00905	0.0983262	0	0	2.6202	12.1211	MUS81;TOP3B;FANCI;SLX1B;FANCA;RPA2;FANCE;TELO2;FANCG;ATR
Fc gamma R-mediated phagocytosis	15/97	0.0101022	1.99559	0.0983262	0	0	2.11121	9.70102	ACTR3;MAP2K1;GSN;SPHK2;ARPC1B;PLA2G4B;INPPL1;PIK3R2;PLD2;AKT2;AKT1;PLCG1;RAF1;LAT;MAPK3
Glycerophospholipid metabolism	15/98	0.0110703	1.95584	0.0983262	0	0	2.08566	9.39273	LYPLA2;DGKD;PCYT2;CHKB;CHKA;PNPLA7;PLA2G4B;TAZ;CRLS1;PLD2;PLPP5;LPCAT4;DGKQ;PNPLA6;CDS2
Nucleotide excision repair	1947-09-01	0.0112235	1.94987	0.0983262	0	0	2.72971	12.2557	RFC5;CDK7;POLD1;POLD2;RPA2;ERCC8;ERCC5;POLE;DDB2
Oxytocin signaling pathway	21/154	0.0113643	1.94446	0.0983262	0	0	1.82413	8.16714	MAP2K1;CAMK2D;MAP2K2;ROCK2;CACNA2D1;NPR2;PLA2G4B;PRKAG1;ADCY3;ITPR3;ADCY6;CAMKK2;PPP1CC;RGS2;CACNB3;MYL6;PLCB3;MAPK7;RAF1;PPP1R12C;MAPK3
Melanoma	1972-12-01	0.0114489	1.94123	0.0983262	0	0	2.30667	10.3105	MAP2K1;MAP2K2;GADD45A;AKT2;ARAF;MDM2;AKT1;PIK3R2;RAF1;MET;DDB2;MAPK3
HIF-1 signaling pathway	16/109	0.013083	1.88329	0.10915	0	0	1.98565	8.61067	MAP2K1;CAMK2D;MAP2K2;CDKN1B;ARNT;PIK3R2;ENO2;ENO3;RELA;LDHA;AKT2;AKT1;PLCG1;ALDOA;PDK1;MAPK3
Neurotrophin signaling pathway	17/119	0.0139046	1.85684	0.112782	0	0	1.92387	8.22557	MAP2K1;CAMK2D;MAP2K2;MAP3K1;ARHGDIG;PIK3R2;FOXO3;RELA;MAPK11;MAPK7;IRAK1;AKT2;RAPGEF1;AKT1;PLCG1;RAF1;MAPK3
GnRH signaling pathway	14/93	0.0158511	1.79994	0.125096	0	0	2.04434	8.47278	MAP2K1;CAMK2D;MAP2K2;MAP3K1;PLA2G4B;ADCY3;ITPR3;ADCY6;PLD2;MAPK11;PLCB3;MAPK7;RAF1;MAPK3
Fc epsilon RI signaling pathway	1968-11-01	0.0186491	1.72934	0.143303	0	0	2.2247	8.85865	MAPK11;MAP2K1;MAP2K2;AKT2;PLA2G4B;AKT1;PIK3R2;PLCG1;RAF1;LAT;MAPK3
Prostate cancer	14/97	0.0222369	1.65293	0.166491	0	0	1.94539	7.40416	MAP2K1;MAP2K2;CDKN1B;GSTP1;ARAF;PIK3R2;RELA;HSP90B1;CCNE2;AKT2;MDM2;AKT1;RAF1;MAPK3
Ribosome biogenesis in eukaryotes	15/108	0.0252335	1.59802	0.177312	0	0	1.86038	6.84542	RBM28;UTP4;POP1;FCF1;NAT10;GNL2;REXO2;UTP18;GTPBP4;GNL3;NOL6;RRP7A;XRN2;SBDS;MDN1
Autophagy	18/137	0.0255038	1.5934	0.177312	0	0	1.74551	6.40416	MAP2K1;MAP2K2;WDR41;TSC2;PIK3R2;AMBRA1;CAMKK2;ATG16L2;ATG16L1;AKT2;RB1CC1;ATG2A;AKT1;ATG4B;ULK1;RAF1;ATG2B;MAPK3
Insulin signaling pathway	18/137	0.0255038	1.5934	0.177312	0	0	1.74551	6.40416	SREBF1;MAP2K1;MAP2K2;ARAF;INPPL1;PRKAG1;TSC2;PIK3R2;PHKA2;PPP1CC;GYS1;AKT2;PHKG2;RAPGEF1;AKT1;RAF1;PCK2;MAPK3
Human T-cell leukemia virus 1 infection	26/219	0.0281274	1.55087	0.191005	0	0	1.55615	5.55701	VAC14;CRTC2;TRRAP;CRTC1;ADCY3;GPS2;PIK3R2;ADCY6;RELA;CDC23;KAT5;AKT2;AKT1;JAK3;MAPK3;STAT5B;RANBP1;MAP2K1;MAP3K1;RANBP3;MAP2K2;NFKB2;KAT2B;KAT2A;CCNE2;ATR
Citrate cycle (TCA cycle)	2023-06-30	0.0293397	1.53254	0.191043	0	0	2.87813	10.1564	IDH3G;DLST;OGDHL;ACO2;IDH3A;PCK2
AMPK signaling pathway	16/120	0.0299973	1.52292	0.191043	0	0	1.77457	6.22278	SREBF1;CRTC2;PRKAG1;PPP2R5B;TSC2;PIK3R2;PPP2R3A;CPT1C;FOXO3;CAMKK2;GYS1;PPP2R3C;AKT2;AKT1;ULK1;PCK2
GnRH secretion	1964-10-01	0.0301505	1.52071	0.191043	0	0	2.13382	7.47168	MAP2K1;PLCB3;MAP2K2;AKT2;AKT1;ITPR3;PIK3R2;ARRB2;RAF1;MAPK3
Other types of O-glycan biosynthesis	1947-08-01	0.0316827	1.49918	0.191043	0	0	2.36258	8.15558	B4GALT2;POMT2;POMT1;EOGT;B3GLCT;PLOD3;RFNG;COLGALT1
FoxO signaling pathway	17/131	0.032578	1.48708	0.191043	0	0	1.72023	5.89026	PLK3;MAP2K1;USP7;MAP2K2;CDKN1B;GADD45A;ARAF;PRKAG1;PIK3R2;FOXO3;MAPK11;AKT2;MDM2;AKT1;RAF1;PCK2;MAPK3
Protein export	2023-05-23	0.0326895	1.48559	0.191043	0	0	3.19697	10.9359	OXA1L;SPCS1;HSPA5;SRP9;SEC11C
Longevity regulating pathway	14/102	0.0327129	1.48528	0.191043	0	0	1.83435	6.27347	HDAC2;EHMT2;PRKAG1;TSC2;ADCY3;PIK3R2;FOXO3;ADCY6;RELA;CAMKK2;AKT2;RB1CC1;AKT1;ULK1
Signaling pathways regulating pluripotency of stem cells	18/143	0.037082	1.43084	0.200527	0	0	1.66118	5.47297	MAP2K1;MAP2K2;SETDB1;PCGF2;PCGF3;PIK3R2;ACVR2B;MAPK11;AKT2;DVL1;AKT1;DVL3;PCGF1;RAF1;FGFR3;JAK3;BMPR1A;MAPK3
C-type lectin receptor signaling pathway	14/104	0.0377719	1.42283	0.200527	0	0	1.79339	5.8755	PLK3;STAT2;ITPR3;PIK3R2;LSP1;RELA;NFKB2;CYLD;MAPK11;AKT2;MDM2;AKT1;RAF1;MAPK3
ErbB signaling pathway	1985-12-01	0.0379569	1.42071	0.200527	0	0	1.89455	6.19764	STAT5B;MAP2K1;CAMK2D;CDKN1B;MAP2K2;AKT2;ARAF;AKT1;PIK3R2;PLCG1;RAF1;MAPK3
Proteoglycans in cancer	24/205	0.0389578	1.40941	0.200527	0	0	1.53074	4.96768	MAP2K1;DDX5;CAMK2D;MAP2K2;ROCK2;PXN;ARAF;FN1;PIK3R2;ITPR3;HSPG2;SLC9A1;PPP1CC;MAPK11;AKT2;MDM2;AKT1;PLCG1;ITGA5;RAF1;MET;PPP1R12C;CD44;MAPK3
Cell cycle	16/124	0.0390385	1.40851	0.200527	0	0	1.70847	5.54091	ZBTB17;HDAC2;CDKN1B;GADD45A;CDC25C;CDC25A;CDC25B;ORC4;CDK7;CDC23;TFDP1;CCNE2;TFDP2;MDM2;E2F4;ATR
Pancreatic cancer	1976-11-01	0.0390647	1.40822	0.200527	0	0	1.95004	6.32306	MAP2K1;GADD45A;AKT2;ARAF;AKT1;PIK3R2;RAF1;RELA;DDB2;PLD2;MAPK3
mTOR signaling pathway	19/154	0.0392222	1.40647	0.200527	0	0	1.62372	5.25843	MAP2K1;SEC13;MAP2K2;NPRL2;TSC2;PIK3R2;WDR24;FLCN;AKT2;DVL1;ATP6V1B2;AKT1;DVL3;ULK1;RAF1;DEPDC5;TELO2;ATP6V1C1;MAPK3
Acute myeloid leukemia	1967-10-01	0.0398306	1.39978	0.200527	0	0	2.02118	6.5145	STAT5B;MAP2K1;MAP2K2;AKT2;ARAF;AKT1;PIK3R2;RAF1;RELA;MAPK3
RNA transport	22/186	0.0422758	1.37391	0.206548	0	0	1.54812	4.89753	EIF4A2;EIF2B5;EIF4A1;NUP205;SEC13;POP1;PABPC4;THOC1;THOC7;SRRM1;FXR1;FXR2;EIF5;DDX39B;EIF3I;RPP21;EIF3G;NUP88;RNPS1;SMN1;PABPC1;EIF4G1
Bladder cancer	1941-07-01	0.0424413	1.37221	0.206548	0	0	2.37042	7.48967	MAP2K1;MAP2K2;ARAF;MDM2;RAF1;FGFR3;MAPK3
Phosphatidylinositol signaling system	13/97	0.0455479	1.34153	0.218033	0	0	1.78371	5.50985	MTMR2;DGKD;IPMK;INPPL1;ITPR3;PIK3R2;PLCB3;DGKQ;INPP5E;PLCG1;IP6K1;PI4K2A;CDS2
Epithelial cell signaling in Helicobacter pylori infection	1970-10-01	0.0514536	1.28858	0.24233	0	0	1.91981	5.69621	MAPK11;ATP6V0B;ATP6V1B2;TCIRG1;PLCG1;MET;GIT1;RELA;ATP6V1C1;ATP6V0A1
Growth hormone synthesis, secretion and action	15/119	0.0530031	1.2757	0.245665	0	0	1.66261	4.88375	STAT5B;MAP2K1;MAP2K2;MAP3K1;ADCY3;ITPR3;PIK3R2;ADCY6;MAPK11;PLCB3;AKT2;AKT1;PLCG1;RAF1;MAPK3
AGE-RAGE signaling pathway in diabetic complications	13/100	0.0558702	1.25282	0.254908	0	0	1.72192	4.96726	STAT5B;CDKN1B;FN1;VEGFB;PIK3R2;AGER;RELA;MAPK11;PLCB3;AKT2;AKT1;PLCG1;MAPK3
Nicotinate and nicotinamide metabolism	1935-06-01	0.0572325	1.24236	0.257106	0	0	2.38125	6.8119	SIRT5;NT5M;SIRT6;SIRT7;NT5C2;NADK
Shigellosis	27/246	0.0589571	1.22946	0.258937	0	0	1.42301	4.02847	RNF31;GSK3A;ROCK2;ARPC1B;PXN;PIK3R2;ITPR3;FOXO3;RELA;U2AF1L4;SHARPIN;AKT2;AKT1;PLCG1;MAPK3;CAST;ACTR3;MAPK11;PLCB3;ATG16L1;MDM2;ELMO2;ARHGEF2;ITGA5;TECPR1;CD44;PPID
Hepatitis B	19/162	0.0599948	1.22189	0.258937	0	0	1.53221	4.31087	STAT5B;MAP2K1;MAP2K2;MAP3K1;STAT2;ARAF;PIK3R2;HSPG2;RELA;DDB2;MAPK11;CCNE2;IRAK1;AKT2;AKT1;STAT6;RAF1;JAK3;MAPK3
Collecting duct acid secretion	2023-05-27	0.0603003	1.21968	0.258937	0	0	2.61513	7.34438	ATP6V1B2;TCIRG1;SLC12A7;ATP6V1C1;ATP6V0A1
Apoptosis	17/142	0.0619432	1.20801	0.262136	0	0	1.5679	4.36118	DFFB;MAP2K1;PARP3;MAP2K2;GADD45A;PARP2;HTRA2;ITPR3;PIK3R2;CTSW;RELA;PIDD1;AKT2;AKT1;CTSF;RAF1;MAPK3
DNA replication	1936-06-01	0.0642268	1.19228	0.267918	0	0	2.30175	6.31908	RFC5;RNASEH2C;POLD1;POLD2;RPA2;POLE
Vascular smooth muscle contraction	16/133	0.0662308	1.17894	0.272386	0	0	1.57627	4.27896	MAP2K1;RAMP2;MAP2K2;ROCK2;NPR2;PLA2G4B;ARAF;ADCY3;ITPR3;ADCY6;PPP1CC;MYL6;PLCB3;RAF1;PPP1R12C;MAPK3
Regulation of actin cytoskeleton	24/218	0.0696653	1.15698	0.282531	0	0	1.42715	3.802	ACTR3;MAP2K1;GSN;MAP2K2;ITGA3;ROCK2;ARPC1B;ITGA2B;PXN;ARAF;FN1;PIK3R2;BAIAP2;IQGAP3;SSH3;SLC9A1;PPP1CC;ITGA5;ARHGEF7;RAF1;FGFR3;PPP1R12C;GIT1;MAPK3
Neutrophil extracellular trap formation	21/189	0.07911	1.10177	0.313679	0	0	1.44133	3.65654	HDAC5;MAP2K1;HDAC2;MAP2K2;HDAC3;HDAC10;HDAC11;ITGA2B;PIK3R2;AGER;HDAC6;RELA;HDAC7;MAPK11;PLCB3;CLCN4;AKT2;AKT1;PLCG1;RAF1;MAPK3
Hepatocellular carcinoma	19/168	0.0798807	1.09756	0.313679	0	0	1.47003	3.71508	SMARCD1;MAP2K1;MAP2K2;SMARCC2;SMARCD3;GADD45A;GSTP1;ARAF;PIK3R2;DDB2;AKT2;DVL1;AKT1;DVL3;PLCG1;RAF1;BRD7;MET;MAPK3
Parathyroid hormone synthesis, secretion and action	13/106	0.0809992	1.09152	0.313679	0	0	1.6103	4.04719	MAP2K1;ARAF;ADCY3;ITPR3;ARRB2;ADCY6;PLD2;PLCB3;NACA;PDE4B;PDE4A;RAF1;MAPK3
Apelin signaling pathway	16/137	0.0816424	1.08808	0.313679	0	0	1.52383	3.81781	HDAC5;MAP2K1;MAP2K2;JAG1;SPHK2;PRKAG1;ADCY3;ITPR3;ADCY6;SLC9A1;PLCB3;AKT2;GNB2;AKT1;RAF1;MAPK3
Phospholipase D signaling pathway	17/148	0.0839079	1.0762	0.317554	0	0	1.4956	3.70615	MAP2K1;DGKD;MAP2K2;SPHK2;PLA2G4B;TSC2;ADCY3;PIK3R2;ADCY6;PLD2;PLCB3;AKT2;DGKQ;AKT1;PLCG1;RAF1;MAPK3
Long-term potentiation	1967-09-01	0.0855277	1.06789	0.317554	0	0	1.78648	4.3928	PPP1CC;MAP2K1;PLCB3;CAMK2D;MAP2K2;ARAF;ITPR3;RAF1;MAPK3
Amino sugar and nucleotide sugar metabolism	1948-07-01	0.0861797	1.0646	0.317554	0	0	1.96497	4.81676	CYB5R1;GALT;GNPDA2;FPGT;MPI;GMPPA;GNPNAT1
Chemokine signaling pathway	21/192	0.0897335	1.04705	0.317554	0	0	1.41581	3.4134	STAT5B;MAP2K1;GSK3A;ROCK2;STAT2;PXN;ADCY3;PIK3R2;ARRB2;FOXO3;ADCY6;RELA;PLCB3;GRK2;AKT2;GNB2;AKT1;PLCG1;RAF1;JAK3;MAPK3
Purine metabolism	15/129	0.0922174	1.03519	0.317554	0	0	1.51594	3.61339	NPR2;ADCY3;AMPD2;NUDT5;NT5C2;PFAS;ADCY6;NUDT9;IMPDH2;PDE4B;PDE4A;NT5M;PDE7A;PDE8A;GART
Relaxin signaling pathway	15/129	0.0922174	1.03519	0.317554	0	0	1.51594	3.61339	MAP2K1;MAP2K2;VEGFB;ADCY3;PIK3R2;ARRB2;ADCY6;RELA;MAPK11;PLCB3;AKT2;GNB2;AKT1;RAF1;MAPK3
Adrenergic signaling in cardiomyocytes	17/150	0.0922273	1.03514	0.317554	0	0	1.47295	3.51077	CAMK2D;CACNA2D1;PPP2R5B;ADCY3;PPP2R3A;ADCY6;SLC9A1;PPP1CC;MAPK11;CACNB3;PLCB3;PPP2R3C;AKT2;TNNT2;AKT1;SCN1B;MAPK3
Alzheimer disease	37/369	0.0924014	1.03432	0.317554	0	0	1.2865	3.06396	NDUFB8;CSF1;NDUFA11;NDUFB10;NDUFA10;ARAF;PIK3R2;ITPR3;AMBRA1;COX5B;KLC1;AGER;RELA;APH1A;NCSTN;KLC3;KLC2;AKT2;PSMD2;RB1CC1;DVL1;AKT1;DVL3;NDUFV1;MAPK3;MAP2K1;MAP2K2;COX6C;PLCB3;CDK5;NDUFS7;PSMC4;ATG2A;ULK1;RAF1;PPID;ATG2B
Sphingolipid metabolism	1949-07-01	0.0939591	1.02706	0.317554	0	0	1.91808	4.53605	ARSA;CERS5;ASAH1;SMPD4;SPHK2;GBA2;CERS1
Arginine biosynthesis	2023-04-22	0.0942986	1.02549	0.317554	0	0	2.55597	6.03539	ACY1;GLS2;GPT;ASL
Ubiquitin mediated proteolysis	16/140	0.0946136	1.02405	0.317554	0	0	1.48672	3.50561	PIAS4;MAP3K1;PPIL2;UBA7;SMURF1;UBE2C;HUWE1;SYVN1;WWP2;DDB2;UBE2W;CDC23;UBE2Q1;MDM2;ERCC8;STUB1
PD-L1 expression and PD-1 checkpoint pathway in cancer	1989-11-01	0.0984176	1.00693	0.326568	0	0	1.62388	3.76502	MAPK11;MAP2K1;MAP2K2;AKT2;AKT1;PIK3R2;PLCG1;RAF1;RELA;LAT;MAPK3
Cysteine and methionine metabolism	1950-07-01	0.102115	0.990909	0.331307	0	0	1.87337	4.27438	LDHA;GCLC;MAT2A;PSAT1;MRI1;PHGDH;KYAT1
Vibrio cholerae infection	1950-07-01	0.102115	0.990909	0.331307	0	0	1.87337	4.27438	ATP6V0B;ATP6V1B2;ADCY3;TCIRG1;PLCG1;ATP6V1C1;ATP6V0A1
Pathways of neurodegeneration	46/475	0.103349	0.985696	0.331624	0	0	1.23827	2.81043	NDUFB8;CAMK2D;CSF1;NDUFA11;NDUFB10;UBA7;NDUFA10;DCTN3;ARAF;WDR41;HTT;HTRA2;ITPR3;PARK7;AMBRA1;KLC1;COX5B;AGER;RELA;KLC3;KLC2;ACTR1B;PSMD2;RB1CC1;DVL1;ATXN1L;DVL3;PLCG1;NDUFV1;MAPK3;MAP2K1;MAP2K2;HSPA5;COX6C;ATXN2L;MAPK11;PLCB3;CDK5;NDUFS7;PSMC4;ATG2A;ULK1;RAF1;PPID;DNAL1;ATG2B
Long-term depression	1960-08-01	0.104682	0.980129	0.332251	0	0	1.77068	3.99612	MAP2K1;PLCB3;MAP2K2;PLA2G4B;ARAF;ITPR3;RAF1;MAPK3
Mismatch repair	2023-04-23	0.107269	0.969526	0.336801	0	0	2.42132	5.40538	RFC5;POLD1;POLD2;RPA2
PI3K-Akt signaling pathway	35/354	0.114382	0.941642	0.35423	0	0	1.26585	2.74463	LAMA5;CRTC2;CDKN1B;CSF1;PKN3;ITGA2B;PIK3R2;FOXO3;RELA;HSP90B1;THBS3;GYS1;PPP2R3C;AKT2;AKT1;JAK3;PCK2;MAPK3;MAP2K1;MAP2K2;ITGA3;LAMB2;FN1;VEGFB;PPP2R5B;TSC2;PPP2R3A;OSMR;CCNE2;GNB2;MDM2;ITGA5;RAF1;FGFR3;MET
Cushing syndrome	17/155	0.115246	0.938374	0.35423	0	0	1.41919	3.06643	KMT2D;MAP2K1;CAMK2D;MAP2K2;CDKN1B;KMT2A;ARNT;ADCY3;ITPR3;ADCY6;PLCB3;CCNE2;DVL1;DVL3;PDE8A;MEN1;MAPK3
Rap1 signaling pathway	22/210	0.118142	0.927596	0.359348	0	0	1.34871	2.88066	MAP2K1;MAP2K2;CSF1;ITGA2B;VEGFB;ADCY3;PIK3R2;ADCY6;MAPK11;PLCB3;SIPA1L1;AKT2;RAPGEF1;KRIT1;AKT1;EVL;PLCG1;RAF1;FGFR3;MET;LAT;MAPK3
Fructose and mannose metabolism	1933-05-01	0.120201	0.920091	0.361843	0	0	2.05407	4.35174	AKR1B10;FPGT;MPI;GMPPA;ALDOA
Porphyrin and chlorophyll metabolism	1943-06-01	0.126328	0.898499	0.374484	0	0	1.86558	3.85963	MMAB;UROS;HMBS;PPOX;CP;EARS2
Focal adhesion	21/201	0.126965	0.896315	0.374484	0	0	1.34436	2.77455	LAMA5;MAP2K1;ITGA3;ROCK2;LAMB2;ITGA2B;PXN;FN1;VEGFB;PIK3R2;THBS3;PPP1CC;AKT2;RAPGEF1;ZYX;AKT1;ITGA5;RAF1;MET;PPP1R12C;MAPK3
Amyotrophic lateral sclerosis	35/364	0.149095	0.826536	0.428787	0	0	1.2267	2.33461	NUP205;NDUFB8;NDUFA11;NDUFB10;NDUFA10;DCTN3;WDR41;ITPR3;AMBRA1;COX5B;KLC1;HDAC6;KLC3;ACTR1B;KLC2;PSMD2;RB1CC1;NUP88;HNRNPA1;NDUFV1;UBQLN4;SEC13;HSPA5;ANXA11;COX6C;ATXN2L;MAPK11;NDUFS7;PSMC4;HNRNPA2B1;ATG2A;ULK1;SRSF7;DNAL1;ATG2B
Colorectal cancer	1986-10-01	0.149124	0.826452	0.428787	0	0	1.51431	2.8817	MAP2K1;MAP2K2;GADD45A;AKT2;ARAF;AKT1;PIK3R2;RAF1;DDB2;MAPK3
Glycosylphosphatidylinositol (GPI)-anchor biosynthesis	2023-04-26	0.150505	0.82245	0.428787	0	0	2.0908	3.95947	PIGO;GPAA1;PIGQ;MPPE1
Oocyte meiosis	14/129	0.15125	0.820304	0.428787	0	0	1.40161	2.64739	MAP2K1;CAMK2D;PPP2R5B;ADCY3;ITPR3;CDC25C;ADCY6;AURKA;PPP1CC;MAPK11;CDC23;SLK;CCNE2;MAPK3
Inflammatory mediator regulation of TRP channels	1998-11-01	0.16024	0.795228	0.449906	0	0	1.45518	2.66454	PPP1CC;MAPK11;PLCB3;CAMK2D;TRPV4;PLA2G4B;ADCY3;ITPR3;PIK3R2;PLCG1;ADCY6
ECM-receptor interaction	1988-10-01	0.165478	0.781259	0.455069	0	0	1.47533	2.65399	LAMA5;ITGA3;LAMB2;ITGA2B;FN1;ITGA5;AGRN;HSPG2;CD44;THBS3
Other glycan degradation	2023-03-18	0.170581	0.768069	0.455069	0	0	2.29931	4.06643	MAN2B1;MAN2C1;GBA2
Synaptic vesicle cycle	1978-09-01	0.17064	0.767919	0.455069	0	0	1.50078	2.65367	ATP6V0B;UNC13A;SLC6A9;ATP6V1B2;AP2A1;TCIRG1;VAMP2;ATP6V1C1;ATP6V0A1
Thyroid cancer	1937-05-01	0.171077	0.766808	0.455069	0	0	1.79692	3.17272	MAP2K1;MAP2K2;GADD45A;MAPK3;DDB2
Dopaminergic synapse	14/132	0.171352	0.76611	0.455069	0	0	1.36575	2.40923	GSK3A;CAMK2D;PPP2R5B;ITPR3;ARRB2;PPP2R3A;COMT;PPP1CC;MAPK11;PLCB3;PPP2R3C;AKT2;GNB2;AKT1
Spinocerebellar ataxia	15/143	0.17143	0.765913	0.455069	0	0	1.3491	2.37924	ITPR3;PIK3R2;AMBRA1;ATXN2L;PLCB3;KAT5;PSMC4;AKT2;PSMD2;RB1CC1;ATXN1L;ATG2A;AKT1;ULK1;ATG2B
Non-alcoholic fatty liver disease	16/155	0.177612	0.750527	0.467232	0	0	1.32519	2.29014	SREBF1;GSK3A;NDUFB8;NDUFA11;NDUFB10;NDUFA10;PRKAG1;PIK3R2;COX5B;COX6C;RELA;MAPK11;NDUFS7;AKT2;AKT1;NDUFV1
Epstein-Barr virus infection	20/202	0.19083	0.719354	0.496415	0	0	1.26533	2.09587	USP7;HDAC2;CDKN1B;GADD45A;STAT2;TNFAIP3;PIK3R2;RELA;DDB2;NFKB2;MAPK11;CCNE2;IRAK1;PSMC4;AKT2;PSMD2;MDM2;AKT1;JAK3;CD44
Platelet activation	13/124	0.193205	0.713982	0.496415	0	0	1.34784	2.21586	ROCK2;PLA2G4B;ITGA2B;ADCY3;ITPR3;PIK3R2;ADCY6;PPP1CC;MAPK11;PLCB3;AKT2;AKT1;MAPK3
MAPK signaling pathway	28/294	0.193899	0.712423	0.496415	0	0	1.2126	1.98917	CSF1;ARAF;ARRB2;RELA;RPS6KA4;MAPK7;IRAK1;AKT2;AKT1;MAP3K6;MAPK3;MAP4K2;MAP2K1;MAP3K1;MAP2K2;GADD45A;CACNA2D1;PLA2G4B;VEGFB;MAPK8IP3;CDC25B;NFKB2;MAPK11;CACNB3;TAOK2;RAF1;FGFR3;MET
Salmonella infection	24/249	0.198907	0.70135	0.496415	0	0	1.22842	1.9838	ACTR3;MAP2K1;MAP2K2;ROCK2;ARPC1B;DCTN3;AHNAK2;KLC1;RELA;HSP90B1;MAPK11;DYNC1LI2;KLC3;ACTR1B;KLC2;IRAK1;AKT2;VPS11;AKT1;ELMO2;PLEKHM2;RAF1;VPS16;MAPK3
B cell receptor signaling pathway	1981-09-01	0.198949	0.701259	0.496415	0	0	1.43801	2.32197	MAP2K1;MAP2K2;AKT2;INPPL1;AKT1;PIK3R2;RAF1;RELA;MAPK3
Breast cancer	15/147	0.198987	0.701175	0.496415	0	0	1.30793	2.11167	JAG2;MAP2K1;MAP2K2;JAG1;GADD45A;ARAF;PIK3R2;NFKB2;DDB2;AKT2;DVL1;AKT1;DVL3;RAF1;MAPK3
Th1 and Th2 cell differentiation	1992-10-01	0.200606	0.697656	0.496415	0	0	1.40305	2.25388	JAG2;STAT5B;MAPK11;JAG1;STAT6;PLCG1;JAK3;RELA;LAT;MAPK3
Pathways in cancer	48/531	0.208224	0.681468	0.510937	0	0	1.14567	1.79772	LAMA5;HDAC2;CAMK2D;CDKN1B;ROCK2;GSTP1;ITGA2B;ARAF;ADCY3;PIK3R2;CSF2RA;ADCY6;RELA;HSP90B1;PLD2;AKT2;DVL1;AKT1;DVL3;STAT6;PLCG1;JAK3;MAPK3;JAG2;ZBTB17;STAT5B;MAP2K1;JAG1;MAP2K2;ITGA3;GADD45A;LAMB2;STAT2;PLEKHG5;FN1;VEGFB;ARNT;KIF7;DDB2;NFKB2;PLCB3;TRAF4;CCNE2;GNB2;MDM2;RAF1;MET;FGFR3
T cell receptor signaling pathway	11/104	0.210067	0.677641	0.510988	0	0	1.36085	2.12337	MAPK11;MAP2K1;MAP2K2;AKT2;AKT1;PIK3R2;PLCG1;RAF1;LAT;RELA;MAPK3
One carbon pool by folate	2023-03-20	0.21252	0.6726	0.510988	0	0	2.02858	3.14171	MTFMT;TYMS;GART
Gastric cancer	15/149	0.213495	0.670612	0.510988	0	0	1.28827	1.98926	MAP2K1;MAP2K2;CDKN1B;GADD45A;ARAF;PIK3R2;DDB2;CCNE2;AKT2;DVL1;AKT1;DVL3;RAF1;MET;MAPK3
Fluid shear stress and atherosclerosis	14/139	0.223034	0.651629	0.529479	0	0	1.28878	1.93372	PIAS4;GSTP1;ITGA2B;PIK3R2;ACVR2B;RELA;HSP90B1;MAPK11;MAPK7;AKT2;TRPV4;AKT1;ARHGEF2;BMPR1A
Inositol phosphate metabolism	1973-08-01	0.228318	0.641461	0.537651	0	0	1.41554	2.09078	PLCB3;ISYNA1;MTMR2;IPMK;INPP5E;INPPL1;PLCG1;PI4K2A
Galactose metabolism	1931-04-01	0.233875	0.631017	0.546331	0	0	1.70315	2.47462	B4GALT2;GALT;AKR1B10;GAA
Insulin resistance	11/108	0.246484	0.608211	0.571217	0	0	1.30444	1.82682	PPP1CC;GYS1;SREBF1;CRTC2;SLC27A1;AKT2;PRKAG1;AKT1;PIK3R2;RELA;PCK2
Oxidative phosphorylation	13/133	0.267409	0.572824	0.614831	0	0	1.24614	1.64363	ATP6V0B;NDUFB8;NDUFA11;NDUFB10;NDUFA10;TCIRG1;COX5B;COX6C;NDUFS7;ATP6V1B2;NDUFV1;ATP6V1C1;ATP6V0A1
Gap junction	1988-09-01	0.271584	0.566096	0.616548	0	0	1.31009	1.70768	MAP2K1;PLCB3;MAP2K2;MAPK7;ADCY3;ITPR3;RAF1;ADCY6;MAPK3
Bacterial invasion of epithelial cells	1977-08-01	0.27406	0.562155	0.616548	0	0	1.33319	1.72569	ACTR3;ARPC1B;PXN;FN1;ELMO2;PIK3R2;ITGA5;MET
Vasopressin-regulated water reabsorption	1944-05-01	0.275084	0.560534	0.616548	0	0	1.47384	1.90225	DYNC1LI2;ARHGDIG;ADCY3;ADCY6;VAMP2
Mannose type O-glycan biosynthesis	2023-03-23	0.278713	0.554842	0.616548	0	0	1.72402	2.20255	B4GALT2;POMT2;POMT1
Proximal tubule bicarbonate reclamation	2023-03-23	0.278713	0.554842	0.616548	0	0	1.72402	2.20255	GLS2;SLC25A10;PCK2
TNF signaling pathway	11/112	0.284969	0.545202	0.624722	0	0	1.25251	1.57237	RPS6KA4;MAPK11;MAP2K1;JAG1;CSF1;AKT2;AKT1;TNFAIP3;PIK3R2;RELA;MAPK3
Melanogenesis	10/101	0.289351	0.538575	0.624722	0	0	1.26367	1.56709	MAP2K1;PLCB3;CAMK2D;MAP2K2;DVL1;DVL3;ADCY3;RAF1;ADCY6;MAPK3
Hedgehog signaling pathway	1956-06-01	0.290614	0.536683	0.624722	0	0	1.37955	1.70479	GRK2;SMURF1;IQCE;ARRB2;KIF7;CSNK1G1
ABC transporters	1945-05-01	0.290966	0.536157	0.624722	0	0	1.43691	1.77394	ABCD4;ABCA2;ABCB6;ABCA7;ABCC10
Cholinergic synapse	11/113	0.294859	0.530386	0.628458	0	0	1.24016	1.51456	MAP2K1;PLCB3;CAMK2D;AKT2;GNB2;AKT1;ADCY3;ITPR3;PIK3R2;ADCY6;MAPK3
Retrograde endocannabinoid signaling	14/148	0.297596	0.526374	0.629695	0	0	1.20162	1.45639	FAAH;NDUFB8;NDUFA11;NDUFB10;NDUFA10;ADCY3;ITPR3;ADCY6;MAPK11;PLCB3;NDUFS7;GNB2;NDUFV1;MAPK3
Mitophagy	1968-07-01	0.301666	0.520474	0.633715	0	0	1.31928	1.58107	RHOT2;TFE3;ULK1;AMBRA1;FOXO3;TBC1D17;RELA
Morphine addiction	1991-09-01	0.304877	0.515876	0.635885	0	0	1.26195	1.49901	GRK2;GNB2;PDE4B;PDE4A;ADCY3;ARRB2;PDE7A;PDE8A;ADCY6
Adipocytokine signaling pathway	1969-07-01	0.314763	0.502016	0.65185	0	0	1.29793	1.50032	AKT2;PRKAG1;AKT1;CPT1C;RELA;CAMKK2;PCK2
NF-kappa B signaling pathway	10/104	0.321119	0.493334	0.66033	0	0	1.22314	1.38941	PIAS4;CYLD;PIDD1;IRAK1;GADD45A;TNFAIP3;PLCG1;LAT;RELA;NFKB2
D-Glutamine and D-glutamate metabolism	2023-01-05	0.341305	0.466858	0.69693	0	0	2.87227	3.08763	GLS2
Ether lipid metabolism	1949-05-01	0.355714	0.448899	0.721309	0	0	1.306	1.34992	LPCAT4;PLA2G4B;GDPD3;PAFAH1B1;PLD2
Diabetic cardiomyopathy	18/203	0.361687	0.441668	0.728362	0	0	1.11873	1.13773	CAMK2D;NDUFB8;NDUFA11;NDUFB10;NDUFA10;PIK3R2;COX5B;COX6C;AGER;RELA;GYS1;PPP1CC;MAPK11;PLCB3;NDUFS7;AKT2;AKT1;NDUFV1
p53 signaling pathway	1973-07-01	0.367974	0.434182	0.734231	0	0	1.219	1.21868	PIDD1;CCNE2;GADD45A;MDM2;TSC2;DDB2;ATR
Tuberculosis	16/180	0.36963	0.432233	0.734231	0	0	1.12164	1.11632	PLK3;ATP6V0B;CAMK2D;SPHK2;RFXANK;LSP1;TCIRG1;RELA;MAPK11;IRAK1;AKT2;RFX5;AKT1;RAF1;ATP6V0A1;MAPK3
Axon guidance	16/182	0.386652	0.41268	0.762854	0	0	1.10801	1.05286	EPHB6;CAMK2D;ROCK2;SEMA3B;SEMA4C;PIK3R2;SEMA3F;SSH3;CDK5;PLXNB2;PLXNB1;PLCG1;RAF1;MET;PLXNA3;MAPK3
Phosphonate and phosphinate metabolism	2023-01-06	0.394079	0.404416	0.767141	0	0	2.29769	2.13961	PCYT2
Vitamin B6 metabolism	2023-01-06	0.394079	0.404416	0.767141	0	0	2.29769	2.13961	PSAT1
Thermogenesis	20/232	0.399528	0.398453	0.772598	0	0	1.08449	0.994986	SMARCD1;NDUFB8;SMARCC2;SMARCD3;NDUFA11;NDUFB10;NDUFA10;PRKAG1;ADCY3;TSC2;SIRT6;CPT1C;COX5B;COX6C;ADCY6;MAPK11;NDUFS7;NDUFAF5;NDUFV1;COX20
Gastric acid secretion	1976-07-01	0.408273	0.389049	0.784314	0	0	1.16581	1.04435	PLCB3;CAMK2D;ADCY3;ITPR3;SLC4A2;ADCY6;SLC9A1
Estrogen signaling pathway	12/137	0.417343	0.379507	0.796497	0	0	1.10328	0.964095	MAP2K1;PLCB3;MAP2K2;AKT2;AKT1;ADCY3;ITPR3;PIK3R2;RAF1;ADCY6;HSP90B1;MAPK3
Glutamatergic synapse	10/114	0.430579	0.365947	0.816423	0	0	1.10492	0.931035	PLCB3;GRK2;GLS2;GNB2;PLA2G4B;ADCY3;ITPR3;ADCY6;PLD2;MAPK3
Human immunodeficiency virus 1 infection	18/212	0.433978	0.362532	0.816637	0	0	1.06631	0.890112	MAP2K1;MAP2K2;PXN;PIK3R2;ITPR3;CDC25C;SAMHD1;RELA;MAPK11;IRAK1;AP1G2;AKT2;GNB2;AKT1;PLCG1;RAF1;ATR;MAPK3
Aminoacyl-tRNA biosynthesis	1966-06-01	0.436285	0.360229	0.816637	0	0	1.149	0.953046	MTFMT;SARS2;TARS2;VARS2;EARS2;WARS2
Osteoclast differentiation	11/127	0.439441	0.3571	0.817304	0	0	1.08965	0.89597	CYLD;MAPK11;MAP2K1;CSF1;AKT2;STAT2;AKT1;PIK3R2;RELA;NFKB2;MAPK3
Glycolysis / Gluconeogenesis	1967-06-01	0.450803	0.346013	0.829009	0	0	1.1301	0.900378	LDHA;ADPGK;ENO2;ALDOA;ENO3;PCK2
Regulation of lipolysis in adipocytes	1955-05-01	0.453166	0.343743	0.829009	0	0	1.1489	0.909354	AKT2;AKT1;ADCY3;PIK3R2;ADCY6
Toll-like receptor signaling pathway	9/104	0.455437	0.341572	0.829009	0	0	1.08849	0.856097	MAPK11;MAP2K1;MAP2K2;IRAK1;AKT2;AKT1;PIK3R2;RELA;MAPK3
RNA polymerase	2023-03-31	0.457091	0.339998	0.829009	0	0	1.2309	0.963641	POLR3A;POLR3GL;POLR3D
cAMP signaling pathway	18/216	0.466288	0.331345	0.837059	0	0	1.04454	0.79693	MAP2K1;CAMK2D;MAP2K2;ROCK2;ADCY3;PIK3R2;ADCY6;RELA;PLD2;SLC9A1;PPP1CC;AKT2;PDE4B;AKT1;PDE4A;CNGA4;RAF1;MAPK3
Pyrimidine metabolism	1956-05-01	0.469103	0.328732	0.837059	0	0	1.12632	0.852546	DTYMK;NT5M;NT5C2;TYMS;UCKL1
cGMP-PKG signaling pathway	14/167	0.470129	0.327783	0.837059	0	0	1.05131	0.793473	MAP2K1;MAP2K2;ROCK2;NPR2;ADCY3;ITPR3;ADCY6;PPP1CC;RGS2;PLCB3;AKT2;AKT1;RAF1;MAPK3
IL-17 signaling pathway	1994-08-01	0.48304	0.316017	0.840527	0	0	1.06866	0.777616	MAPK11;MAPK7;TRAF4;TNFAIP3;RELA;IL17RA;HSP90B1;MAPK3
TGF-beta signaling pathway	1994-08-01	0.48304	0.316017	0.840527	0	0	1.06866	0.777616	TGIF2;TFDP1;SMURF1;CHRD;E2F4;ACVR2B;MAPK3;BMPR1A
Legionellosis	1957-05-01	0.484891	0.314356	0.840527	0	0	1.1046	0.799541	CLK1;HSF1;CLK4;RELA;NFKB2
Riboflavin metabolism	2023-01-08	0.487289	0.312213	0.840527	0	0	1.64103	1.17973	ACP2
Sulfur relay system	2023-01-08	0.487289	0.312213	0.840527	0	0	1.64103	1.17973	URM1
Huntington disease	25/306	0.489348	0.310382	0.840527	0	0	1.02209	0.730468	HDAC2;NDUFB8;NDUFA11;NDUFB10;NDUFA10;DCTN3;HTT;AP2A1;AMBRA1;COX5B;KLC1;KLC3;ACTR1B;KLC2;PSMD2;RB1CC1;NDUFV1;COX6C;PLCB3;NDUFS7;PSMC4;ATG2A;ULK1;DNAL1;ATG2B
Ras signaling pathway	19/232	0.494706	0.305653	0.844761	0	0	1.02472	0.721191	MAP2K1;MAP2K2;CSF1;PLA2G4B;VEGFB;PIK3R2;RELA;PLD2;RASA4;AKT2;GNB2;AKT1;PLCG1;RIN1;RAF1;FGFR3;MET;LAT;MAPK3
SNARE interactions in vesicular transport	1933-03-01	0.499177	0.301745	0.84744	0	0	1.14872	0.798123	BNIP1;USE1;VAMP2
Dilated cardiomyopathy	1996-08-01	0.507318	0.29472	0.856282	0	0	1.04426	0.708652	CACNB3;ITGA3;CACNA2D1;TNNT2;ITGA2B;ADCY3;ITGA5;ADCY6
Circadian entrainment	1997-08-01	0.519321	0.284564	0.871504	0	0	1.03247	0.676507	PER1;PLCB3;CAMK2D;GNB2;ADCY3;ITPR3;ADCY6;MAPK3
Carbohydrate digestion and absorption	1947-04-01	0.52603	0.278989	0.872497	0	0	1.06849	0.686392	PLCB3;AKT2;AKT1;PIK3R2
Alcoholism	15/186	0.528221	0.277184	0.872497	0	0	1.00747	0.643009	HDAC5;MAP2K1;HDAC2;HDAC3;HDAC10;HDAC11;ARAF;CAMKK1;HDAC6;CAMKK2;HDAC7;PPP1CC;GNB2;RAF1;MAPK3
Parkinson disease	20/249	0.528877	0.276646	0.872497	0	0	1.00304	0.638938	CAMK2D;NDUFB8;NDUFA11;NDUFB10;UBA7;HSPA5;NDUFA10;HTRA2;ITPR3;PARK7;COX5B;COX6C;KLC1;KLC3;KLC2;NDUFS7;PSMC4;PSMD2;PLCG1;NDUFV1
Human cytomegalovirus infection	18/225	0.537992	0.269224	0.882548	0	0	0.998628	0.619062	MAP2K1;MAP2K2;ROCK2;PXN;ADCY3;TSC2;PIK3R2;ITPR3;ADCY6;RELA;MAPK11;PLCB3;AKT2;GNB2;MDM2;AKT1;RAF1;MAPK3
Glycerolipid metabolism	1961-05-01	0.546185	0.26266	0.890983	0	0	1.02547	0.620203	PLPP5;DGKD;AKR1B10;DGAT1;DGKQ
Measles	11/139	0.562062	0.250216	0.904215	0	0	0.98685	0.568567	STAT5B;CDKN1B;CCNE2;IRAK1;AKT2;STAT2;AKT1;TNFAIP3;PIK3R2;JAK3;RELA
Thyroid hormone synthesis	1975-06-01	0.562594	0.249805	0.904215	0	0	0.998638	0.574413	PLCB3;HSPA5;ADCY3;ITPR3;ADCY6;HSP90B1
Sulfur metabolism	2023-01-10	0.566168	0.247055	0.904215	0	0	1.27622	0.725994	SELENBP1
Basal cell carcinoma	1963-05-01	0.575494	0.239959	0.904215	0	0	0.990003	0.547003	GADD45A;DVL1;DVL3;KIF7;DDB2
N-Glycan biosynthesis	1950-04-01	0.575956	0.239611	0.904215	0	0	0.99864	0.550973	B4GALT2;DPAGT1;MAN2A2;DOLPP1
Chagas disease	8/102	0.577635	0.238346	0.904215	0	0	0.977282	0.536345	MAPK11;PLCB3;IRAK1;AKT2;AKT1;PIK3R2;RELA;MAPK3
Alanine, aspartate and glutamate metabolism	1937-03-01	0.577964	0.238099	0.904215	0	0	1.01335	0.555565	GLS2;GPT;ASL
Transcriptional misregulation in cancer	15/192	0.579069	0.23727	0.904215	0	0	0.973001	0.531583	ZBTB17;DDX5;HDAC2;CDKN1B;KMT2A;LDB1;GADD45A;TFE3;ASPSCR1;RELA;DDB2;CDK9;MDM2;MET;MEN1
Hypertrophic cardiomyopathy	1990-07-01	0.588648	0.230144	0.913481	0	0	0.968425	0.513195	CACNB3;ITGA3;CACNA2D1;TNNT2;ITGA2B;PRKAG1;ITGA5
Primary immunodeficiency	1938-03-01	0.596402	0.224461	0.913481	0	0	0.984347	0.508751	RFX5;RFXANK;JAK3
Taurine and hypotaurine metabolism	2023-01-11	0.600935	0.221172	0.913481	0	0	1.14853	0.584911	CSAD
Ubiquinone and other terpenoid-quinone biosynthesis	2023-01-11	0.600935	0.221172	0.913481	0	0	1.14853	0.584911	COQ6
Tight junction	13/169	0.601957	0.220434	0.913481	0	0	0.956681	0.485582	ACTR3;MAP3K1;ROCK2;ARPC1B;PRKAG1;SCRIB;CGN;MYL6;MICALL2;SYMPK;ARHGEF2;LLGL1;LLGL2
Cortisol synthesis and secretion	1965-05-01	0.603773	0.219126	0.913481	0	0	0.956898	0.482809	PLCB3;ADCY3;ITPR3;PDE8A;ADCY6
Various types of N-glycan biosynthesis	1939-03-01	0.614304	0.211616	0.924623	0	0	0.956952	0.466289	B4GALT2;MAN2A2;B4GALNT4
Glycosaminoglycan biosynthesis	1953-04-01	0.622755	0.205683	0.928026	0	0	0.937345	0.443929	B4GALT2;NDST2;EXT2;XYLT2
Salivary secretion	1993-07-01	0.623739	0.204997	0.928026	0	0	0.93449	0.4411	PLCB3;ADCY3;ITPR3;SLC4A2;VAMP2;ADCY6;SLC9A1
Necroptosis	12/159	0.627928	0.20209	0.928026	0	0	0.93703	0.436028	RNF31;STAT5B;CYLD;CAMK2D;SHARPIN;USP21;PLA2G4B;STAT2;TNFAIP3;STAT6;JAK3;PPID
Glycine, serine and threonine metabolism	1940-03-01	0.631663	0.199514	0.928026	0	0	0.931038	0.427718	GRHPR;PSAT1;PHGDH
Th17 cell differentiation	8/107	0.632456	0.19897	0.928026	0	0	0.927671	0.425007	STAT5B;MAPK11;STAT6;PLCG1;JAK3;LAT;RELA;MAPK3
Chemical carcinogenesis	18/239	0.642736	0.191968	0.938394	0	0	0.934646	0.413134	STAT5B;MAP2K1;JAG1;MAP2K2;GSTP1;ADCY3;ARNT;PIK3R2;ARRB2;ADCY6;RELA;CDC25A;HSP90B1;AKT2;AKT1;KPNA2;RAF1;MAPK3
Ferroptosis	1941-03-01	0.648472	0.188109	0.942059	0	0	0.906488	0.392633	MAP1LC3B;GCLC;CP
Toxoplasmosis	8/112	0.683109	0.16551	0.987464	0	0	0.88283	0.336448	LAMA5;MAPK11;IRAK1;LAMB2;AKT2;AKT1;RELA;MAPK3
Serotonergic synapse	8/113	0.692698	0.159456	0.991723	0	0	0.874374	0.321036	MAP2K1;PLCB3;GNB2;PLA2G4B;ARAF;ITPR3;RAF1;MAPK3
Insulin secretion	1986-06-01	0.695782	0.157527	0.991723	0	0	0.860808	0.312231	PLCB3;CAMK2D;ADCY3;ITPR3;VAMP2;ADCY6
Glyoxylate and dicarboxylate metabolism	1930-02-01	0.705104	0.151747	0.991723	0	0	0.820089	0.286548	GRHPR;ACO2
Pentose phosphate pathway	1930-02-01	0.705104	0.151747	0.991723	0	0	0.820089	0.286548	PGD;ALDOA
beta-Alanine metabolism	1930-02-01	0.705104	0.151747	0.991723	0	0	0.820089	0.286548	SMOX;ACADS
Cardiac muscle contraction	1987-06-01	0.706433	0.150929	0.991723	0	0	0.850135	0.295445	CACNB3;CACNA2D1;TNNT2;COX5B;COX6C;SLC9A1
Basal transcription factors	1945-03-01	0.710171	0.148637	0.9922	0	0	0.819977	0.280637	GTF2A2;CDK7;GTF2E2
Circadian rhythm	1931-02-01	0.722208	0.141338	0.999995	0	0	0.791767	0.257674	PER1;PRKAG1
Endocytosis	18/252	0.728202	0.137748	0.999995	0	0	0.88209	0.279779	ACTR3;SH3GLB2;SMURF1;WIPF2;ARPC1B;SNX12;AP2A1;AGAP3;SNF8;ARRB2;EPN1;PLD2;ACAP3;ACAP2;GRK2;MDM2;FGFR3;GIT1
Influenza A	12/172	0.732053	0.135457	0.999995	0	0	0.860283	0.268324	CPSF4;MAP2K1;MAP2K2;PABPN1;AKT2;STAT2;AKT1;PIK3R2;KPNA2;RAF1;RELA;MAPK3
Pyruvate metabolism	1947-03-01	0.737735	0.132099	0.999995	0	0	0.78262	0.23805	GRHPR;LDHA;PCK2
Pertussis	1976-05-01	0.738318	0.131757	0.999995	0	0	0.808161	0.245181	MAPK11;IRAK1;ITGA5;RELA;MAPK3
Lipid and atherosclerosis	15/215	0.748225	0.125968	0.999995	0	0	0.860019	0.24945	CAMK2D;HSPA5;ROCK2;MIB2;PIK3R2;AGER;RELA;HSP90B1;MAPK11;PLCB3;IRAK1;AKT2;AKT1;PLCG1;MAPK3
Arrhythmogenic right ventricular cardiomyopathy	1977-05-01	0.748698	0.125693	0.999995	0	0	0.796893	0.230637	CACNB3;ITGA3;CACNA2D1;ITGA2B;ITGA5
Cytosolic DNA-sensing pathway	1963-04-01	0.753577	0.122873	0.999995	0	0	0.778049	0.220129	POLR3A;POLR3GL;POLR3D;RELA
MicroRNAs in cancer	22/310	0.754208	0.122509	0.999995	0	0	0.875571	0.246987	HDAC5;MAP2K1;HDAC2;CDKN1B;MAP2K2;GLS2;PIK3R2;CDC25C;CDC25A;CDC25B;HNRNPK;MAPK7;CCNE2;MDM2;PLCG1;ITGA5;RAF1;FGFR3;MET;CD44;EZH2;MAPK3
JAK-STAT signaling pathway	11/162	0.758046	0.120305	0.999995	0	0	0.835482	0.231438	PIAS4;STAT5B;AKT2;STAT2;AKT1;PIK3R2;STAT6;RAF1;OSMR;CSF2RA;JAK3
Primary bile acid biosynthesis	2023-01-17	0.758268	0.120178	0.999995	0	0	0.717598	0.198573	HSD3B7
Selenocompound metabolism	2023-01-17	0.758268	0.120178	0.999995	0	0	0.717598	0.198573	KYAT1
Rheumatoid arthritis	1993-06-01	0.764942	0.116371	0.999995	0	0	0.791245	0.212018	ATP6V0B;CSF1;ATP6V1B2;TCIRG1;ATP6V1C1;ATP6V0A1
Propanoate metabolism	1934-02-01	0.768549	0.114328	0.999995	0	0	0.717422	0.188862	LDHA;ACADS
Fatty acid biosynthesis	2023-01-18	0.777647	0.109218	0.999995	0	0	0.67535	0.169839	MECR
Kaposi sarcoma-associated herpesvirus infection	13/193	0.780788	0.107467	0.999995	0	0	0.828033	0.204898	MAP2K1;MAP2K2;STAT2;PIK3R2;ITPR3;RELA;MAPK11;AKT2;GNB2;AKT1;PLCG1;RAF1;MAPK3
Wnt signaling pathway	11/166	0.784994	0.105134	0.999995	0	0	0.813743	0.196991	TLE3;TLE2;PORCN;PLCB3;CAMK2D;TLE1;DAAM2;ROCK2;CHD8;DVL1;DVL3
Ovarian steroidogenesis	1951-03-01	0.78658	0.104257	0.999995	0	0	0.717245	0.172182	PLA2G4B;ADCY3;ADCY6
Glycosaminoglycan degradation	2023-01-19	0.795473	0.0993745	0.999995	0	0	0.637796	0.145939	IDUA
Starch and sucrose metabolism	1936-02-01	0.795571	0.0993211	0.999995	0	0	0.675147	0.154403	GYS1;GAA
Peroxisome	1982-05-01	0.796018	0.0990772	0.999995	0	0	0.744944	0.169947	ABCD4;PEX6;PEX11A;PEX5;PEX1
Aldosterone-regulated sodium reabsorption	1937-02-01	0.808006	0.0925856	0.999995	0	0	0.655821	0.139812	PIK3R2;MAPK3
Endocrine and other factor-regulated calcium reabsorption	1953-03-01	0.80803	0.0925723	0.999995	0	0	0.68848	0.146754	PLCB3;AP2A1;ADCY6
Steroid biosynthesis	2023-01-20	0.811871	0.0905129	0.999995	0	0	0.604195	0.125922	FDFT1
Hematopoietic cell lineage	1999-06-01	0.814339	0.0891946	0.999995	0	0	0.739955	0.151971	CSF1;ITGA3;ITGA2B;ITGA5;CSF2RA;CD44
Protein processing in endoplasmic reticulum	11/171	0.815565	0.0885416	0.999995	0	0	0.788097	0.160673	MBTPS1;SEC13;HSPA5;SYVN1;PREB;STUB1;PDIA6;UBQLN4;SEC24C;HSP90B1;SEC31A
Hepatitis C	10/157	0.816457	0.0880668	0.999995	0	0	0.779877	0.158145	MAP2K1;MAP2K2;AKT2;STAT2;ARAF;AKT1;PIK3R2;RAF1;RELA;MAPK3
RIG-I-like receptor signaling pathway	1970-04-01	0.822227	0.0850081	0.999995	0	0	0.695263	0.13609	CYLD;MAPK11;MAP3K1;RELA
Natural killer cell mediated cytotoxicity	8/131	0.832962	0.079375	0.999995	0	0	0.745682	0.136287	MAP2K1;MAP2K2;ARAF;PIK3R2;PLCG1;RAF1;LAT;MAPK3
Amoebiasis	6/102	0.835781	0.0779073	0.999995	0	0	0.716714	0.12857	LAMA5;PLCB3;LAMB2;FN1;PIK3R2;RELA
Pancreatic secretion	6/102	0.835781	0.0779073	0.999995	0	0	0.716714	0.12857	PLCB3;ADCY3;ITPR3;SLC4A2;ADCY6;SLC9A1
Prion disease	18/273	0.83658	0.0774924	0.999995	0	0	0.808512	0.144265	NDUFB8;NDUFA11;NDUFB10;HSPA5;NDUFA10;PIK3R2;ITPR3;COX5B;COX6C;KLC1;MAPK11;KLC3;KLC2;NDUFS7;PSMC4;PSMD2;NDUFV1;MAPK3
Glutathione metabolism	1957-03-01	0.845491	0.0728911	0.999995	0	0	0.637343	0.10697	GCLC;GSTP1;PGD
Renin-angiotensin system	2023-01-23	0.853594	0.0687487	0.999995	0	0	0.521719	0.082588	CTSA
PPAR signaling pathway	1974-04-01	0.853815	0.0686361	0.999995	0	0	0.655391	0.103578	SLC27A1;PLIN4;CPT1C;PCK2
Tryptophan metabolism	1942-02-01	0.860569	0.0652145	0.999995	0	0	0.573688	0.0861461	DLST;KYAT1
Vitamin digestion and absorption	2023-01-24	0.865334	0.062816	0.999995	0	0	0.499009	0.0721762	SLC19A1
Mineral absorption	1960-03-01	0.86926	0.0608505	0.999995	0	0	0.6037	0.0845864	SLC31A1;CLCN2;SLC26A6
Fat digestion and absorption	1943-02-01	0.869356	0.0608024	0.999995	0	0	0.559665	0.0783545	SLC27A1;DGAT1
Fatty acid degradation	1943-02-01	0.869356	0.0608024	0.999995	0	0	0.559665	0.0783545	CPT1C;ACADS
Leishmaniasis	1977-04-01	0.874259	0.0583601	0.999995	0	0	0.628354	0.0844377	MAPK11;IRAK1;RELA;MAPK3
alpha-Linolenic acid metabolism	2023-01-25	0.876134	0.0574295	0.999995	0	0	0.478191	0.0632342	PLA2G4B
Glycosphingolipid biosynthesis	1945-02-01	0.88542	0.0528506	0.999995	0	0	0.533576	0.0649325	B4GALT2;B4GALNT1
Folate biosynthesis	2023-01-26	0.886068	0.052533	0.999995	0	0	0.459038	0.055526	AKR1B10
Proteasome	1946-02-01	0.892747	0.0492715	0.999995	0	0	0.52142	0.0591561	PSMC4;PSMD2
Type II diabetes mellitus	1946-02-01	0.892747	0.0492715	0.999995	0	0	0.52142	0.0591561	PIK3R2;MAPK3
Fatty acid elongation	2023-01-27	0.895206	0.0480772	0.999995	0	0	0.441359	0.0488592	MECR
Aldosterone synthesis and secretion	1998-05-01	0.901669	0.0449529	0.999995	0	0	0.616243	0.063786	PLCB3;CAMK2D;ADCY3;ITPR3;ADCY6
Butanoate metabolism	2023-01-28	0.903611	0.0440186	0.999995	0	0	0.424989	0.0430754	ACADS
Valine, leucine and isoleucine degradation	1948-02-01	0.906111	0.0428184	0.999995	0	0	0.498696	0.049168	IVD;ACADS
Linoleic acid metabolism	2023-01-29	0.911342	0.0403185	0.999995	0	0	0.409789	0.0380434	PLA2G4B
Cocaine addiction	1949-02-01	0.912194	0.039913	0.999995	0	0	0.488059	0.0448541	CDK5;RELA
Hippo signaling pathway	9/163	0.912882	0.0395854	0.999995	0	0	0.669308	0.0610065	PPP1CC;WWC1;DVL1;DVL3;SCRIB;LLGL1;TEAD2;LLGL2;BMPR1A
Arginine and proline metabolism	1950-02-01	0.917904	0.0372025	0.999995	0	0	0.477865	0.0409348	SMOX;PRODH
Malaria	1950-02-01	0.917904	0.0372025	0.999995	0	0	0.477865	0.0409348	MET;THBS3
NOD-like receptor signaling pathway	10/181	0.921898	0.035317	0.999995	0	0	0.669539	0.0544472	RNF31;MAPK11;PLCB3;SHARPIN;ATG16L1;STAT2;TNFAIP3;ITPR3;RELA;MAPK3
Amphetamine addiction	1969-03-01	0.922281	0.0351368	0.999995	0	0	0.521121	0.0421615	PPP1CC;CAMK2D;HDAC2
Renin secretion	1969-03-01	0.922281	0.0351368	0.999995	0	0	0.521121	0.0421615	PLCB3;ITPR3;ADCY6
Protein digestion and absorption	5/103	0.923028	0.0347853	0.999995	0	0	0.584642	0.0468275	COL18A1;COL16A1;COL5A1;COL7A1;SLC1A5
Pathogenic Escherichia coli infection	11/197	0.924457	0.0341134	0.999995	0	0	0.676967	0.0531751	ACTR3;MAPK11;IRAK1;ROCK2;WIPF2;ARPC1B;ARHGEF2;BAIAP2;SEC24C;RELA;MAPK3
Phagosome	8/152	0.927135	0.032857	0.999995	0	0	0.636205	0.0481327	DYNC1LI2;ATP6V0B;ATP6V1B2;TCIRG1;ITGA5;ATP6V1C1;ATP6V0A1;THBS3
Adherens junction	1971-03-01	0.931003	0.0310491	0.999995	0	0	0.505739	0.0361569	BAIAP2;MET;MAPK3
GABAergic synapse	1989-04-01	0.933184	0.0300326	0.999995	0	0	0.539292	0.0372934	GLS2;GNB2;ADCY3;ADCY6
Bile secretion	1990-04-01	0.936737	0.0283825	0.999995	0	0	0.532992	0.0348326	ADCY3;SLC4A2;ADCY6;SLC9A1
Pentose and glucuronate interconversions	1934-01-01	0.941638	0.0261161	0.999995	0	0	0.347605	0.020903	AKR1B10
Tyrosine metabolism	1936-01-01	0.950628	0.0219896	0.999995	0	0	0.327706	0.0165927	COMT
Calcium signaling pathway	13/240	0.952859	0.0209712	0.999995	0	0	0.654896	0.0316236	CAMK2D;SPHK2;MST1;VEGFB;ADCY3;ITPR3;MCOLN1;PHKA2;PLCB3;PHKG2;PLCG1;FGFR3;MET
African trypanosomiasis	1937-01-01	0.954589	0.0201834	0.999995	0	0	0.318586	0.014806	PLCB3
Antigen processing and presentation	1978-03-01	0.954902	0.0200413	0.999995	0	0	0.458361	0.0211519	HSPA5;RFX5;RFXANK
Leukocyte transendothelial migration	5/114	0.956153	0.0194728	0.999995	0	0	0.525326	0.0235544	MAPK11;ROCK2;PXN;PIK3R2;PLCG1
Arachidonic acid metabolism	1961-02-01	0.961446	0.0170749	0.999995	0	0	0.388538	0.015276	PLA2G4B;LTC4S
Inflammatory bowel disease	1965-02-01	0.970894	0.0128282	0.999995	0	0	0.36379	0.0107456	STAT6;RELA
Taste transduction	1986-03-01	0.972661	0.0120387	0.999995	0	0	0.414001	0.0114761	PLCB3;ITPR3;ADCY6
Viral myocarditis	1960-01-01	0.993374	0.00288711	0.999995	0	0	0.194148	0.00129066	EIF4G1
Drug metabolism	3/108	0.993519	0.00282368	0.999995	0	0	0.326865	0.0021252	GSTP1;IMPDH2;UCKL1
Steroid hormone biosynthesis	1961-01-01	0.993906	0.00265454	0.999995	0	0	0.190902	0.00116685	COMT
Retinol metabolism	1968-01-01	0.996609	0.00147532	0.999995	0	0	0.170891	0.000580527	DGAT1
Metabolism of xenobiotics by cytochrome P450	1976-01-01	0.998264	0.000754584	0.999995	0	0	0.152596	0.000265135	GSTP1
Viral protein interaction with cytokine and cytokine receptor	1/100	0.999765	0.000101875	0.999995	0	0	0.115452	2.70822e-05	CSF1
Cell adhesion molecules	2/148	0.999939	2.64267e-05	0.999995	0	0	0.156267	9.50881e-06	CNTNAP1;GLG1
Herpes simplex virus 1 infection	16/498	0.999992	3.27107e-06	0.999995	0	0	0.374982	2.82434e-06	EIF2B5;STAT2;TSC2;PIK3R2;RELA;HCFC1;SRPK1;PPP1CC;ZFP57;IRAK1;AKT2;AKT1;SRSF5;ITGA5;SRSF7;ZFP28
Cytokine-cytokine receptor interaction	6/295	0.999994	2.76282e-06	0.999995	0	0	0.235567	1.49859e-06	CSF1;OSMR;CSF2RA;ACVR2B;IL17RA;BMPR1A
Olfactory transduction	6/440	0.999995	2.15206e-06	0.999995	0	0	0.155608	7.71082e-07	RGS2;CAMK2D;GRK2;ADCY3;ARRB2;CNGA4

## Sheet: SE
Term	Overlap	P-value		Adjusted P-value	Old P-value	Old Adjusted P-value	Odds Ratio	Combined Score	Genes
Ubiquitin mediated proteolysis	44/140	6.7905e-07	6.1681	0.000208468	0	0	2.62204	37.2397	UBE3C;AIRE;CUL2;NEDD4L;XIAP;CBLB;UBE3A;BRCA1;UBE2J2;RHOBTB2;HERC3;COP1;HERC2;CDC26;UBR5;ELOC;BTRC;SKP2;PIAS4;UBE2H;UBE2I;PPIL2;SMURF2;UBE2B;FBXW11;FBXW7;UBE2E1;HUWE1;UBE2E2;WWP2;PIAS2;PML;DDB2;DDB1;CUL4A;UBOX5;NEDD4;UBA3;ERCC8;BIRC6;TRIM37;TRIP12;UBE2K;BIRC2
Lysine degradation	23/63	2.13449e-05	4.67071	0.00327644	0	0	3.27707	35.244	KMT2E;SUV39H2;GCDH;SETD2;KMT2A;EHMT2;KMT2C;SETD7;DOT1L;KMT2B;SETDB2;EHMT1;DLST;PLOD2;PRDM2;ACAT1;ALDH3A2;NSD3;TMLHE;MECOM;KMT5B;COLGALT1;EZH2
Endocytosis	61/252	7.53486e-05	4.12293	0.00771067	0	0	1.82731	17.3474	WASHC4;VPS29;TFRC;SH3KBP1;ARPC5L;CBLB;ARRB1;WASL;ARRB2;PSD3;AP2M1;ACTR3;SH3GLB2;USP8;IST1;VPS37A;ARFGAP3;ARFGAP1;DNM1;RNF41;DNM2;EPN2;TGFBR2;DNM3;ACAP2;RABEP1;BIN1;HGS;PARD3;RUFY2;CHMP3;TSG101;SRC;NEDD4L;VPS26A;AGAP3;ACTR3B;PLD2;RAB11FIP1;SNX2;GRK2;PIP5K1A;SNX5;CYTH1;SNX6;SMAD2;ARFGEF1;SMURF2;IQSEC1;CAV2;VTA1;ARPC4;STAM;AP2B1;RAB11A;PML;DAB2;ARPC3;NEDD4;FGFR3;FGFR2
Phosphatidylinositol signaling system	29/97	0.000139027	3.8569	0.0106704	0	0	2.43146	21.5934	IPPK;PI4K2B;MTMR2;DGKD;MTMR3;INPP1;DGKA;MTMR14;INPPL1;ITPR1;CALML4;PIK3C2A;MTM1;PIP4P2;PPIP5K1;PPIP5K2;PIP4K2A;PIP5K1A;PLCG1;IP6K1;IP6K2;IPMK;INPP4A;PLCB3;PIKFYVE;PLCB4;PI4KB;CALM2;DGKH
Adherens junction	22/71	0.000494351	3.30596	0.0303532	0	0	2.55663	19.4618	TCF7L2;TCF7L1;YES1;CSNK2A1;SRC;ACTN1;CTNND1;CSNK2A2;LEF1;LMO7;WASL;SORBS1;BAIAP2;TGFBR2;AFDN;PARD3;FYN;NECTIN4;MAP3K7;MET;SSX2IP;FGFR1
Glucagon signaling pathway	27/107	0.00380619	2.41951	0.161796	0	0	1.92155	10.7052	ATF2;PFKFB1;CRTC2;ITPR1;SLC2A1;PRKAG2;CALML4;ACACA;LDHA;PPP3CB;PPP4C;PPP3CC;AKT2;PHKG2;CAMK2G;PCK2;PHKA1;PPP4R3A;PHKB;PPP4R3B;PLCB3;CREB1;PKM;PLCB4;SIK2;CALM2;PFKP
Inositol phosphate metabolism	20/73	0.00443978	2.35264	0.161796	0	0	2.14685	11.6298	IPPK;PI4K2B;MTMR2;TPI1;MTMR3;INPP1;MTMR14;IPMK;INPPL1;PIK3C2A;MTM1;INPP4A;MINPP1;PLCB3;PIKFYVE;PLCB4;PIP4K2A;PIP5K1A;PLCG1;PI4KB
Fanconi anemia pathway	16/54	0.00455732	2.34129	0.161796	0	0	2.39434	12.9079	TOP3B;CENPX;TOP3A;REV1;BRCA1;FANCE;PALB2;SLX4;RAD51;FANCD2;REV3L;USP1;POLI;PMS2;POLK;ATR
RNA degradation	21/79	0.00529179	2.2764	0.161796	0	0	2.05995	10.7974	TTC37;DIS3;PARN;ENO2;TENT4A;LSM5;TENT4B;ENO4;PATL1;LSM2;CNOT4;PAN2;LSM7;LSM6;PAN3;CNOT2;MTREX;DCP1A;CNOT9;EXOSC1;PFKP
AMPK signaling pathway	29/120	0.00539992	2.26761	0.161796	0	0	1.81444	9.47389	PFKFB2;PFKFB1;CRTC2;PFKFB4;PFKFB3;PRKAG2;PPP2R2A;HMGCR;ELAVL1;ACACA;CAMKK2;EEF2K;AKT2;MLYCD;MAP3K7;PCK2;PDPK1;STRADA;STRADB;TSC2;TSC1;IGF1;PPP2R3A;CCNA2;CREB1;RPS6KB1;AKT1S1;PPP2R2D;PFKP
Shigellosis	52/246	0.00579723	2.23678	0.161796	0	0	1.52866	7.87319	ARPC5L;WASL;IKBKB;RPS6KA5;AKT2;BTRC;MAP3K7;CAST;ACTR3;CHUK;FNBP1;IL1R1;RIPK2;FBXW11;ACTN1;WIPI2;PLCB3;PLCB4;CTTN;AKT1S1;UBE2V2;RBCK1;ARHGEF2;CRK;CD44;ROCK2;SRC;PXN;ITPR1;U2AF1;ACTR3B;MALT1;MAPK9;TIFA;PLCG1;CYTH1;ATG5;CBX3;BNIP3;ARPC4;PTK2;NFKB1;MAPK12;MYLPF;DIAPH1;RPS6KB1;TNIP1;ARPC3;TAB3;ATM;TAB2;TECPR1
Homologous recombination	1941-12-01	0.0145332	1.83764	0.355594	0	0	2.35115	9.94848	BARD1;TOP3B;RAD51B;RAD52;RAD51;ABRAXAS1;XRCC2;TOP3A;ATM;BRCA1;NBN;PALB2
Glycosaminoglycan degradation	2023-07-19	0.0162544	1.78903	0.355594	0	0	3.31225	13.6445	GALNS;NAGLU;IDUA;GLB1;HEXA;HPSE;GUSB
Ribosome	34/158	0.0173036	1.76186	0.355594	0	0	1.56073	6.33164	RPL5;RPL32;RPL34;MRPL18;MRPS11;RPL12;MRPS10;RPL9;MRPL33;RPS4X;RPS14;MRPL1;RPL18A;RPS18;RPL36;MRPL9;RPS2;RPL17;RPS12;RPL19;RPS9;RPL23;RPS5;MRPL27;MRPS18A;RPSA;RPL23A;MRPS18C;MRPL22;MRPL30;MRPS9;RPL29;RPL28;RPS24
Bacterial invasion of epithelial cells	19/77	0.0173743	1.76009	0.355594	0	0	1.86251	7.54833	ACTR3;SHC1;SRC;CAV2;PXN;ARPC5L;FN1;ARPC4;WASL;ACTR3B;DNM1;PTK2;DNM2;DNM3;ARHGAP10;CTTN;ARPC3;CRK;MET
Lysosome	28/128	0.0234788	1.62932	0.423101	0	0	1.59282	5.97573	ASAH1;IDUA;HEXA;GBA;AP4E1;AP3M1;LAPTM4A;GNPTAB;LAMP1;NAGLU;AP1G2;AP1G1;ATP6V1H;AP4S1;GUSB;CTSA;ATP6V0B;ATP6AP1;SLC11A2;AP3D1;CTNS;NAGA;AP3B1;MCOLN1;GALNS;NPC2;GLB1;PPT2
Propanoate metabolism	1934-10-01	0.0238266	1.62294	0.423101	0	0	2.36659	8.84385	LDHA;ACSS2;PCCA;ACOX1;DBT;ECHDC1;MLYCD;ACOX3;ACACA;ACAT1
Various types of N-glycan biosynthesis	1939-11-01	0.0248072	1.60542	0.423101	0	0	2.23158	8.24931	B4GALT2;FUT8;ALG9;TUSC3;HEXA;MGAT4B;ALG14;ALG13;ALG3;MGAT1;STT3B
D-Glutamine and D-glutamate metabolism	2023-03-05	0.0265702	1.5756	0.429319	0	0	8.51085	30.877	GLUD1;DGLUCY;GLS
HIF-1 signaling pathway	24/109	0.0316823	1.49918	0.448935	0	0	1.60547	5.54209	PFKFB3;TFRC;IFNGR1;CUL2;SLC2A1;ARNT;IGF1;ENO2;ENO4;NFKB1;VEGFA;LDHA;RPS6KB1;AKT2;MKNK1;MKNK2;PGK1;PLCG1;ELOC;ALDOA;EIF4E2;CAMK2G;PFKP;PDK1
Glycosylphosphatidylinositol (GPI)-anchor biosynthesis	2023-08-26	0.0319262	1.49585	0.448935	0	0	2.52357	8.692	PIGB;PIGT;PIGN;PIGQ;PIGP;MPPE1;PIGV;PIGX
Yersinia infection	29/137	0.0321712	1.49253	0.448935	0	0	1.5273	5.24885	ROCK2;SRC;PXN;ARPC5L;WASL;ACTR3B;IKBKB;MAPK9;RPS6KA6;IRAK1;AKT2;PIP5K1A;PLCG1;MAP3K7;MAP2K3;ACTR3;MAP2K4;ARHGEF12;CHUK;LIMK1;FN1;ARPC4;BAIAP2;NFKB1;PTK2;MAPK12;ARPC3;TAB2;CRK
Hedgehog signaling pathway	14/56	0.0339973	1.46856	0.45379	0	0	1.8938	6.40384	CSNK1G3;SMURF2;FBXW11;IQCE;ARRB1;CSNK1D;ARRB2;CSNK1E;DISP1;HHAT;EVC;GRK2;BTRC;CSNK1G1
Spliceosome	31/150	0.0370894	1.43075	0.474436	0	0	1.48175	4.88151	TCERG1;DDX5;RBM25;HNRNPU;U2AF1;PUF60;TXNL4A;HNRNPA1;SRSF10;BCAS2;RBM17;PRPF38B;CCDC12;THOC1;CDC5L;PRPF40A;LSM5;U2SURP;LSM2;LSM7;LSM6;PRPF18;PHF5A;PRPF3;SRSF3;ACIN1;SRSF5;HNRNPC;SRSF6;SRSF7;SLU7
Fructose and mannose metabolism	1933-09-01	0.049245	1.30764	0.587372	0	0	2.12922	6.41098	PFKFB2;PFKFB1;PFKFB4;PFKFB3;TPI1;GMPPA;ALDOA;PFKP;KHK
Fc gamma R-mediated phagocytosis	21/97	0.0497449	1.30325	0.587372	0	0	1.5704	4.71252	VASP;ACTR3;GSN;SYK;LIMK2;LIMK1;ARPC5L;INPPL1;ARPC4;PLA2G6;ACTR3B;PLD2;DNM2;RPS6KB1;BIN1;ARPC3;AKT2;PIP5K1A;PLCG1;CRK;PLPP1
Tight junction	33/169	0.0643446	1.19149	0.709137	0	0	1.37972	3.78526	ROCK2;SRC;ARPC5L;NEDD4L;PRKAG2;PPP2R2A;ARHGAP17;ACTR3B;YBX3;MAPK9;SYMPK;MAGI1;VASP;ACTR3;HSPA4;ACTN1;SCRIB;ARPC4;TJAP1;RUNX1;TIAM1;AFDN;MYL6;CTTN;ARPC3;PARD3;NEDD4;PPP2R2D;AMOTL2;NF2;ARHGEF2;RAPGEF6;LLGL2
Basal transcription factors	1945-11-01	0.0647968	1.18845	0.709137	0	0	1.83712	5.02728	TAF6L;GTF2A2;CDK7;TAF15;TBP;CCNH;TAF11;GTF2H1;GTF2E2;TAF2;GTF2I
Human immunodeficiency virus 1 infection	40/212	0.0710801	1.14825	0.709137	0	0	1.32265	3.49702	PXN;ITPR1;CALML4;SAMHD1;IKBKB;MAPK9;PPP3CB;GNGT2;PPP3CC;CASP8;IRAK1;AP1G2;AP1G1;AKT2;PLCG1;ELOC;BTRC;PAK3;MAP3K7;MAP2K3;CHUK;FBXW11;LIMK2;LIMK1;GNG12;PTK2;NFKB1;MAPK12;DDB1;CUL4A;RPS6KB1;GNB2;GNB1;GNB4;FAS;ATM;TAB2;CALM2;CRK;ATR
Regulation of actin cytoskeleton	41/218	0.0712085	1.14747	0.709137	0	0	1.31747	3.48095	ROCK2;SRC;PXN;ARPC5L;WASL;ACTR3B;IQGAP3;SLC9A1;PPP1CB;PIP4K2A;PIP5K1A;PAK3;ACTR3;GSN;ARHGEF12;PPP1R12A;ACTN1;LIMK2;LIMK1;FN1;BRAF;ARPC4;GNG12;BAIAP2;PTK2;SSH1;MYLPF;ENAH;TIAM1;DIAPH1;DIAPH2;PIKFYVE;DIAPH3;ABI2;APC;ARPC3;ITGA6;FGFR3;CRK;FGFR2;FGFR1
Ferroptosis	1941-10-01	0.0770976	1.11296	0.709137	0	0	1.83145	4.69342	MAP1LC3B;TFRC;GPX4;GSS;PCBP2;SLC11A2;SAT1;CP;SLC39A14;ATG5
Insulin signaling pathway	27/137	0.0798284	1.09784	0.709137	0	0	1.39501	3.52641	SHC1;INPPL1;PRKAG2;CBLB;CALML4;ACACA;PPP1CB;IKBKB;MAPK9;AKT2;MKNK1;MKNK2;PHKG2;FLOT2;PCK2;PDPK1;TSC2;PHKA1;TSC1;BRAF;PHKB;SORBS1;RPS6KB1;EIF4E2;CALM2;CRK;RHOQ
Spinocerebellar ataxia	28/143	0.0806738	1.09327	0.709137	0	0	1.38384	3.48359	PSMD14;ITPR1;OMA1;AMBRA1;RBPJ;PSMD8;ATXN3;MAPK9;PSMB7;ATXN2;ATXN1;KAT5;OPA1;AKT2;NOP56;TBP;WIPI2;PUM1;PUM2;PSMA6;PLCB3;PSMA3;PLCB4;PSMA4;PSMC6;PSMA2;ATG2A;ULK2
Dopaminergic synapse	26/132	0.084778	1.07172	0.709137	0	0	1.3939	3.43975	ATF2;ITPR1;PPP2R2A;ARRB1;CALML4;CACNA1C;ARRB2;COMT;PPP1CB;MAPK9;PPP3CB;GNGT2;PPP3CC;AKT2;CAMK2G;PPP2R3A;GNG12;MAPK12;PLCB3;CREB1;PLCB4;GNB2;GNB1;PPP2R2D;GNB4;CALM2
MAPK signaling pathway	53/294	0.0853889	1.0686	0.709137	0	0	1.25112	3.07844	ATF2;FLT4;ARRB1;ARRB2;ECSIT;IKBKB;RPS6KA6;PPP3CB;RPS6KA5;PPP3CC;MECOM;AKT2;MAP3K7;MAP2K3;MAP2K4;CHUK;IL1R1;MAPK8IP3;TGFBR2;PPM1B;MAPKAPK5;CRK;MET;MAX;CACNA1C;EFNA5;RELB;RAP1B;MAPK9;IRAK1;MKNK1;MKNK2;FLNA;FLNB;FLNC;MAP4K3;MAP2K5;MAP4K4;MAP3K2;BRAF;IGF1;GNG12;NFKB1;MAPK12;VEGFA;TAOK1;TAOK2;NF1;FAS;TAB2;FGFR3;FGFR2;FGFR1
RNA transport	35/186	0.0890848	1.0502	0.709137	0	0	1.31769	3.18639	EIF4A2;EIF4A1;NUP188;FMR1;GEMIN2;POP4;NMD3;NXT2;FXR1;SUMO1;TGS1;SUMO2;SAP18;NDC1;UBE2I;THOC1;PYM1;UPF3B;NUP153;SENP2;THOC7;SRRM1;EEF1A1;NUP93;EIF3I;RPP21;TACC3;ACIN1;RNPS1;NUP98;EIF4E2;EIF4G3;EIF4G2;RAN;EIF4G1
Transcriptional misregulation in cancer	36/192	0.0891836	1.04972	0.709137	0	0	1.31195	3.17106	DDX5;CCNT2;CCNT1;KMT2A;MAX;HDAC1;DOT1L;JMJD1C;AFF1;FUT8;SIN3A;NFKBIZ;POLK;KDM6A;SS18;TAF15;EYA1;IGF1;ETV4;RUNX2;NFKB1;PBX1;PTK2;PML;RUNX1;DDB2;ETV6;TGFBR2;CCNA2;ZEB1;EWSR1;REL;BMP2K;ATM;MET;BIRC2
Glycerophospholipid metabolism	20/98	0.0900859	1.04534	0.709137	0	0	1.45661	3.50604	PLA2G12A;DGKD;CHKA;DGKA;MBOAT1;MBOAT2;PLA2G6;TAZ;CRLS1;SELENOI;PLD2;PGS1;GNPAT;PTDSS2;GPAM;GPAT3;CHPT1;LPIN1;PLPP1;DGKH
mRNA surveillance pathway	20/98	0.0900859	1.04534	0.709137	0	0	1.45661	3.50604	SMG1;CPSF3;CSTF2;PYM1;UPF3B;PPP2R2A;MSI2;PPP2R3A;NXT2;SMG7;SRRM1;WDR33;PPP1CB;FIP1L1;PPP2R2D;PAPOLA;SYMPK;SAP18;ACIN1;RNPS1
Pancreatic cancer	16/76	0.0968897	1.01372	0.728404	0	0	1.51445	3.535	RB1;SMAD2;RALBP1;CHUK;BRAF;NFKB1;DDB2;TGFBR2;PLD2;VEGFA;IKBKB;MAPK9;RAD51;RPS6KB1;AKT2;POLK
Selenocompound metabolism	2023-05-17	0.098509	1.00652	0.728404	0	0	2.36431	5.47955	TXNRD2;CTH;SEPHS1;PAPSS1;PSTK
Peroxisome	17/82	0.0996513	1.00152	0.728404	0	0	1.48538	3.42541	ABCD4;PECR;PEX11A;ECI2;IDH2;PEX2;SOD2;PEX26;GNPAT;PEX7;SCP2;ACOX1;PEX5;FAR1;HACL1;MLYCD;ACOX3
Salmonella infection	45/249	0.102368	0.989836	0.730859	0	0	1.25431	2.85879	AHNAK;ROCK2;CSE1L;LEF1;ARPC5L;WASL;KLC1;PIK3C2A;ACTR3B;IKBKB;KLC4;MAPK9;ACTR1B;CASP8;IRAK1;AKT2;FLNA;FLNB;KPNA4;FLNC;PAK3;MAP3K7;VPS39;CYTH1;MAP2K3;ACTR3;MAP2K4;TCF7L2;TCF7L1;CHUK;RIPK2;ARPC4;NFKB1;MAPK12;DNM2;MYLPF;DYNC1LI2;ARPC3;ABI1;VPS41;TAB3;TAB2;EXOC5;RAB7B;BIRC2
Cell cycle	24/124	0.110192	0.957851	0.752708	0	0	1.36344	3.00712	RB1;SMAD2;CCNH;HDAC1;CDC7;CDC14B;CCNA2;CDK7;STAG1;ORC6;STAG2;TFDP1;PTTG1;TFDP2;CDC26;CHEK2;ORC3;ORC2;CDK2;MCM4;ATM;SKP2;E2F5;ATR
SNARE interactions in vesicular transport	1933-08-01	0.110332	0.957299	0.752708	0	0	1.81622	4.00343	STX16;GOSR2;SNAP23;STX7;BNIP1;SEC22B;VTI1B;BET1
Autophagy	26/137	0.118772	0.925286	0.75507	0	0	1.33072	2.83515	MTMR3;MTMR14;ITPR1;AMBRA1;TANK;CAMKK2;MAPK9;LAMP1;AKT2;MAP3K7;ATG5;UVRAG;PDPK1;BNIP3;TSC2;TSC1;EIF2AK4;WIPI2;ATG16L2;RPS6KB1;AKT1S1;ATG2A;ATG4C;ULK2;ATG4A;RAB7B
N-Glycan biosynthesis	1950-11-01	0.11943	0.922888	0.75507	0	0	1.60112	3.40243	B4GALT2;FUT8;ALG9;ALG6;TUSC3;MGAT4B;ALG14;ALG13;ALG3;MGAT1;STT3B
Other glycan degradation	2023-05-18	0.120335	0.919609	0.75507	0	0	2.18231	4.621	GLB1;MAN2B2;GBA;HEXA;MAN2C1
Acute myeloid leukemia	14/67	0.120516	0.918955	0.75507	0	0	1.49978	3.17348	TCF7L2;TCF7L1;CHUK;LEF1;BRAF;NFKB1;PML;RUNX1;IKBKB;CCNA2;RPS6KB1;AKT2;PIM2;PPARD
Hepatitis B	30/162	0.126242	0.898796	0.775126	0	0	1.2913	2.67241	RB1;ATF2;SRC;IKBKB;MAPK9;CASP8;IRAK1;AKT2;JAK2;MAP3K7;IKBKE;JAK3;MAP2K3;MAP2K4;APAF1;ATP6AP1;CHUK;BRAF;TYK2;NFKB1;MAPK12;DDB2;TGFBR2;CCNA2;DDB1;CREB1;CDK2;BIRC5;FAS;TAB2
Mitophagy	14/68	0.131927	0.879665	0.786255	0	0	1.47192	2.98137	USP8;USP15;CSNK2A1;SRC;BNIP3;CSNK2A2;AMBRA1;BCL2L13;MAPK9;RHOT1;NBR1;RAB7B;OPTN;ATG5
Hippo signaling pathway	30/163	0.133567	0.874299	0.786255	0	0	1.28151	2.57988	LEF1;PPP2R2A;PPP1CB;RASSF1;DVL1;BTRC;TEAD1;SMAD2;TEAD4;WNT10B;TCF7L2;TCF7L1;FBXW11;CSNK1D;SCRIB;CSNK1E;SMAD7;TGFBR2;LATS1;FRMD6;APC;PARD3;DLG5;PPP2R2D;BIRC5;NF2;AJUBA;BIRC2;LLGL2;BMPR1A
Proteasome	1946-10-01	0.141656	0.848766	0.786255	0	0	1.57661	3.08126	PSMD8;PSMB7;PSMA6;PSMA3;PSMA4;PSMC6;PSMD14;PSMA2;PSME2;PSMF1
C-type lectin receptor signaling pathway	20/104	0.141752	0.848471	0.786255	0	0	1.35208	2.64153	ARHGEF12;CHUK;SYK;SRC;ITPR1;CBLB;CALML4;NFKB1;MALT1;MAPK12;RELB;IKBKB;CYLD;MAPK9;PPP3CB;CASP8;PPP3CC;AKT2;CALM2;IKBKE
NF-kappa B signaling pathway	20/104	0.141752	0.848471	0.786255	0	0	1.35208	2.64153	PIAS4;UBE2I;CSNK2A1;CHUK;SYK;IL1R1;CSNK2A2;XIAP;NFKB1;MALT1;RELB;IKBKB;CYLD;IRAK1;TAB3;ATM;TAB2;PLCG1;MAP3K7;BIRC2
Nicotinate and nicotinamide metabolism	1935-08-01	0.143421	0.843387	0.786255	0	0	1.68149	3.2654	NT5C;NADK2;NNT;NMRK1;NADSYN1;NT5C2;NADK;SIRT2
Citrate cycle (TCA cycle)	2023-07-30	0.152228	0.817507	0.819892	0	0	1.72701	3.25089	ACLY;IDH2;DLST;OGDHL;ACO2;IDH3A;PCK2
Wnt signaling pathway	30/166	0.157046	0.803973	0.824005	0	0	1.25302	2.31961	INVS;CTBP2;ROCK2;LEF1;MAPK9;PORCN;PPP3CB;PPP3CC;DVL1;BTRC;MAP3K7;CAMK2G;WNT10B;TCF7L2;TCF7L1;TLE1;CSNK2A1;FBXW11;CSNK2A2;CSNK1E;SENP2;TLE6;FOSL1;VANGL1;PLCB3;PLCB4;DAAM1;APC;TBL1XR1;PPARD
Chronic myeloid leukemia	15/76	0.158359	0.800356	0.824005	0	0	1.39597	2.57262	RB1;CHUK;CTBP2;HDAC1;SHC1;BRAF;NFKB1;DDB2;RUNX1;TGFBR2;IKBKB;MECOM;AKT2;POLK;CRK
Notch signaling pathway	1959-12-01	0.165103	0.782246	0.844775	0	0	1.44917	2.61023	NCOR2;JAG2;ADAM17;TLE1;ATXN1;CTBP2;HDAC1;DVL1;NUMB;DTX2;RBPJ;TLE6
Circadian rhythm	2023-07-31	0.172735	0.762619	0.848411	0	0	1.65495	2.90609	CREB1;PER3;FBXW11;PRKAG2;CSNK1D;CSNK1E;BTRC
Amino sugar and nucleotide sugar metabolism	1948-10-01	0.173498	0.760705	0.848411	0	0	1.49346	2.61592	CMAS;GNPDA1;GNPDA2;UXS1;AMDHD2;HEXA;GMPPA;GNPNAT1;UAP1;CYB5RL
Kaposi sarcoma-associated herpesvirus infection	34/193	0.17678	0.752566	0.848411	0	0	1.21465	2.1048	RB1;SRC;LEF1;ITPR1;CALML4;PIK3R5;IKBKB;MAPK9;PPP3CB;GNGT2;PPP3CC;CASP8;AKT2;PLCG1;JAK2;IKBKE;MAP2K4;TCF7L2;TCF7L1;SYK;CHUK;IFNGR1;TYK2;GNG12;NFKB1;MAPK12;VEGFA;CREB1;GNB2;GNB1;GNB4;FAS;IL6ST;CALM2
Thiamine metabolism	2023-04-15	0.177121	0.751731	0.848411	0	0	2.06283	3.57061	TPK1;AK4;AK5;NTPCR
Sulfur metabolism	2023-03-10	0.179631	0.745619	0.848411	0	0	2.43096	4.17359	SQOR;BPNT1;PAPSS1
Long-term potentiation	13/67	0.196692	0.706214	0.914914	0	0	1.36632	2.2218	ITPR1;BRAF;CALML4;CACNA1C;PPP1CB;RAP1B;PPP3CB;RPS6KA6;PLCB3;PPP3CC;PLCB4;CAMK2G;CALM2
Biosynthesis of unsaturated fatty acids	2023-06-27	0.209312	0.679206	0.944819	0	0	1.62093	2.53501	SCP2;ACOX1;TECR;ACOX3;HACD2;HACD4
Small cell lung cancer	17/92	0.2105	0.676747	0.944819	0	0	1.28657	2.00483	RB1;APAF1;CHUK;MAX;FN1;XIAP;NFKB1;PTK2;DDB2;IKBKB;AKT2;CDK2;RARB;ITGA6;POLK;SKP2;BIRC2
mTOR signaling pathway	27/154	0.216866	0.663808	0.944819	0	0	1.20706	1.84496	MAPKAP1;NPRL3;IKBKB;FLCN;RPS6KA6;AKT2;DVL1;ATP6V1H;SLC38A9;SKP2;WNT10B;CHUK;MIOS;PDPK1;STRADA;STRADB;TSC2;TSC1;BRAF;IGF1;SLC7A5;CLIP1;RPS6KB1;AKT1S1;ULK2;EIF4E2;LPIN1
Ubiquinone and other terpenoid-quinone biosynthesis	2023-03-11	0.220998	0.655612	0.944819	0	0	2.12696	3.21087	VKORC1L1;COQ2;GGCX
Phosphonate and phosphinate metabolism	2023-02-06	0.223383	0.65095	0.944819	0	0	2.83567	4.25029	CHPT1;SELENOI
Terpenoid backbone biosynthesis	2023-05-22	0.225855	0.646171	0.944819	0	0	1.66843	2.4824	GGPS1;HMGCS1;HMGCR;ACAT1;PCYOX1
Proteoglycans in cancer	35/205	0.226728	0.644495	0.944819	0	0	1.1691	1.73495	DDX5;ROCK2;SRC;PXN;ITPR1;SLC9A1;PPP1CB;AKT2;FLNA;FLNB;PLCG1;FLNC;CAMK2G;SMAD2;WNT10B;ARHGEF12;PPP1R12A;CAV2;PDPK1;FN1;BRAF;ANK3;IGF1;PTK2;MAPK12;VEGFA;TIAM1;CTTN;RPS6KB1;SDC1;FAS;HPSE;MET;CD44;FGFR1
Legionellosis	1957-11-01	0.227741	0.642558	0.944819	0	0	1.35691	2.00761	EEF1A1;CLK1;BCL2L13;CASP8;APAF1;SAR1A;SAR1B;BNIP3;SEC22B;CLK4;NFKB1
Neurotrophin signaling pathway	21/119	0.242023	0.616143	0.9731	0	0	1.21628	1.72556	SHC1;PDPK1;RIPK2;KIDINS220;BRAF;CALML4;NFKB1;MAPK12;RAP1B;IKBKB;MAPK9;RPS6KA6;RPS6KA5;IRAK1;AKT2;PLCG1;CALM2;CRK;CAMK2G;MAP2K5;SH2B1
Central carbon metabolism in cancer	13/70	0.244067	0.61249	0.9731	0	0	1.29418	1.8252	IDH2;SLC2A1;GLS;SLC7A5;LDHA;PKM;AKT2;MET;FGFR3;FGFR2;PFKP;PDK1;FGFR1
Epithelial cell signaling in Helicobacter pylori infection	13/70	0.244067	0.61249	0.9731	0	0	1.29418	1.8252	MAP2K4;ATP6V0B;ATP6AP1;CHUK;SRC;MAPK12;NFKB1;IKBKB;MAPK9;ADAM17;ATP6V1H;PLCG1;MET
Focal adhesion	34/201	0.24833	0.60497	0.977402	0	0	1.15591	1.61018	SHC1;ROCK2;SRC;FLT4;PXN;TNC;XIAP;ARHGAP5;PPP1CB;RAP1B;MAPK9;AKT2;PIP5K1A;FLNA;FLNB;FYN;FLNC;PAK3;VASP;PPP1R12A;CAV2;PDPK1;ACTN1;FN1;BRAF;IGF1;PTK2;VEGFA;MYLPF;DIAPH1;ITGA6;CRK;MET;BIRC2
PD-L1 expression and PD-1 checkpoint pathway in cancer	16/89	0.254211	0.594806	0.977563	0	0	1.2438	1.70349	MAP2K3;CD274;CHUK;CSNK2A1;IFNGR1;CSNK2A2;MAPK12;NFKB1;IKBKB;EML4;PPP3CB;PPP3CC;RPS6KB1;AKT2;PLCG1;JAK2
Fluid shear stress and atherosclerosis	24/139	0.257919	0.588517	0.977563	0	0	1.18455	1.6052	ACVR1;PIAS4;MAP2K4;CHUK;IL1R1;CAV2;SRC;MGST2;CALML4;NFKB1;PTK2;MAPK12;VEGFA;IKBKB;MAPK9;SUMO1;AKT2;SUMO2;SDC1;ARHGEF2;MAP3K7;CALM2;MAP2K5;BMPR1A
Epstein-Barr virus infection	34/202	0.258081	0.588244	0.977563	0	0	1.14896	1.55625	RB1;PSMD14;HDAC1;RBPJ;RELB;PSMD8;IKBKB;MAPK9;CASP8;IRAK1;SIN3A;AKT2;POLK;SKP2;IKBKE;JAK3;MAP3K7;MAP2K3;MAP2K4;SYK;APAF1;CHUK;TYK2;NFKB1;MAPK12;DDB2;NCOR2;CCNA2;PSMC6;NEDD4;CDK2;FAS;TAB2;CD44
Longevity regulating pathway	18/102	0.263352	0.579463	0.977563	0	0	1.21606	1.62254	ATF2;HDAC1;EHMT2;EHMT1;TSC2;PRKAG2;TSC1;IGF1;SOD2;NFKB1;CAMKK2;CREB1;RPS6KB1;AKT2;AKT1S1;EIF4E2;ATG5;APPL1
Protein processing in endoplasmic reticulum	29/171	0.264292	0.577916	0.977563	0	0	1.15927	1.54264	SAR1A;TUSC3;UBXN2A;SAR1B;UBE2J2;RNF5;SEC61A2;ATXN3;MAPK9;HSPH1;BAG2;OS9;BAG1;UGGT2;SIL1;SEC23B;UGGT1;SEC63;SEC31A;MBTPS1;SEC24A;EDEM1;EIF2AK4;NSFL1C;ERP29;PLAA;STT3B;RNF185;MBTPS2
Viral carcinogenesis	34/203	0.267991	0.57188	0.979442	0	0	1.1421	1.50392	RB1;HDAC4;ATF2;HDAC5;VAC14;GTF2A2;HDAC1;SRC;PXN;UBR4;UBE3A;RBPJ;HDAC8;GTF2E2;HDAC7;POLB;CASP8;SKP2;JAK3;GSN;TBP;SYK;ACTN1;MRPS18B;SCRIB;GTF2H1;NFKB1;DDB1;CCNA2;CREB1;PKM;CDK2;REL;IL6ST
Pathogenic Escherichia coli infection	33/197	0.271478	0.566265	0.980515	0	0	1.14226	1.48936	ROCK2;SRC;ARPC5L;WASL;ACTR3B;IKBKB;MAPK9;CASP8;IRAK1;FYN;PAK3;MAP3K7;CYTH1;ACTR3;ARHGEF11;ARHGEF12;SEC24A;CHUK;IL1R1;MYO5A;ARPC4;BAIAP2;NFKB1;MAPK12;MYO1B;CTTN;ARPC3;ABI1;FAS;TAB3;TAB2;TMBIM6;ARHGEF2
Relaxin signaling pathway	22/129	0.289885	0.537774	0.999996	0	0	1.16679	1.4448	SMAD2;ATF2;MAP2K4;SHC1;SRC;ARRB1;ARRB2;GNG12;NFKB1;MAPK12;TGFBR2;VEGFA;MAPK9;PLCB3;COL3A1;GNGT2;CREB1;PLCB4;AKT2;GNB2;GNB1;GNB4
p53 signaling pathway	13/73	0.295248	0.529813	0.999996	0	0	1.22925	1.49961	CD82;APAF1;TSC2;IGF1;DDB2;COP1;CASP8;CHEK2;CDK2;FAS;ATM;MDM4;ATR
Choline metabolism in cancer	17/98	0.296023	0.528675	0.999996	0	0	1.19085	1.44964	DGKD;SLC22A5;CHKA;SLC44A2;PDPK1;DGKA;TSC2;TSC1;PLD2;MAPK9;RPS6KB1;AKT2;PIP5K1A;CHPT1;PLCG1;PLPP1;DGKH
Glycolysis / Gluconeogenesis	1967-12-01	0.298845	0.524554	0.999996	0	0	1.2378	1.49505	ALDH3A2;MINPP1;LDHA;TPI1;PKM;ACSS2;PGK1;ENO2;ALDOA;ENO4;PFKP;PCK2
Signaling pathways regulating pluripotency of stem cells	24/143	0.307101	0.512718	0.999996	0	0	1.14446	1.35113	ACVR1;SMAD2;WNT10B;RIF1;PCGF5;PCGF2;IGF1;INHBA;ACVR1B;MAPK12;TBX3;APC;AKT2;KAT6A;DVL1;SMARCAD1;IL6ST;JAK2;SKIL;FGFR3;JAK3;FGFR2;BMPR1A;FGFR1
Pathways in cancer	84/531	0.312769	0.504777	0.999996	0	0	1.06718	1.24037	RB1;FLT4;SLC2A1;CALML4;IKBKB;RASSF1;RPS6KA5;GNGT2;CASP8;MECOM;AKT2;ELOC;PIM2;POLK;JAK2;SKP2;JAK3;APPL1;ARHGEF11;IL15RA;RALBP1;ARHGEF12;APAF1;CHUK;IFNGR1;PLEKHG5;NCOA3;ARNT;DDB2;RUNX1;TGFBR2;EML4;CCNA2;PLCB3;PLCB4;IL3RA;RARB;BIRC5;ITGA6;IL6ST;CRK;MET;BIRC2;PPARD;CTBP2;MAX;HDAC1;ROCK2;CUL2;LEF1;MGST2;XIAP;PLD2;MAPK9;DVL1;PLCG1;IL12RB1;CAMK2G;JAG2;SMAD2;WNT10B;TCF7L2;TCF7L1;TXNRD2;FN1;BRAF;IGF1;GNG1…
Toxoplasmosis	19/112	0.316758	0.499272	0.999996	0	0	1.15917	1.3326	MAP2K3;CHUK;IFNGR1;PDPK1;XIAP;TYK2;NFKB1;MAPK12;PIK3R5;IKBKB;MAPK9;CASP8;IRAK1;AKT2;TAB2;ITGA6;JAK2;MAP3K7;BIRC2
Pyrimidine metabolism	1956-10-01	0.326691	0.485862	0.999996	0	0	1.23314	1.37957	DCTD;NT5C;CDA;NT5C3B;DUT;NME6;TK1;NT5C2;TYMS;UCKL1
Arginine and proline metabolism	1950-09-01	0.331408	0.479636	0.999996	0	0	1.24513	1.37512	ALDH3A2;ARG2;P4HA1;SMOX;P4HA2;SMS;AZIN2;PYCR1;SAT1
Renal cell carcinoma	1969-12-01	0.336329	0.473236	0.999996	0	0	1.19423	1.30131	RAP1B;FLCN;AKT2;CUL2;SLC2A1;ARNT;BRAF;ELOC;PAK3;CRK;MET;VEGFA
Th17 cell differentiation	18/107	0.336755	0.472686	0.999996	0	0	1.1474	1.24883	SMAD2;CHUK;IL1R1;IFNGR1;TYK2;NFKB1;MAPK12;RUNX1;TGFBR2;IKBKB;MAPK9;PPP3CB;PPP3CC;PLCG1;IL6ST;JAK2;IL12RB1;JAK3
Osteoclast differentiation	21/127	0.349065	0.457094	0.999996	0	0	1.12395	1.18295	CHUK;SYK;IL1R1;IFNGR1;TYK2;NFKB1;MAPK12;TGFBR2;RELB;FOSL1;IKBKB;CYLD;MAPK9;PPP3CB;PPP3CC;CREB1;TEC;AKT2;TAB2;FYN;MAP3K7
Steroid biosynthesis	2023-04-20	0.352013	0.453442	0.999996	0	0	1.41778	1.48029	SOAT1;MSMO1;LBR;TM7SF2
Ribosome biogenesis in eukaryotes	18/108	0.352021	0.453432	0.999996	0	0	1.13459	1.18458	NOP56;NOP58;CSNK2A1;UTP4;NVL;POP4;CSNK2A2;NMD3;SPATA5;NXT2;REXO2;WDR43;GNL3;REXO5;EMG1;EIF6;DKC1;RAN
Chagas disease	17/102	0.358169	0.445912	0.999996	0	0	1.13454	1.16489	SMAD2;MAP2K4;CHUK;IFNGR1;PPP2R2A;NFKB1;MAPK12;TGFBR2;IKBKB;MAPK9;PLCB3;CASP8;PLCB4;IRAK1;AKT2;PPP2R2D;FAS
Human T-cell leukemia virus 1 infection	35/219	0.368615	0.433427	0.999996	0	0	1.07925	1.07709	RB1;ATF2;VAC14;CRTC2;SLC2A1;XIAP;RELB;IKBKB;POLB;MAPK9;PPP3CB;PPP3CC;KAT5;PTTG1;AKT2;CDC26;CHEK2;JAK3;SMAD2;IL15RA;MAP2K4;RANBP3;TBP;CHUK;IL1R1;NFYB;NFKB1;TGFBR2;FOSL1;CCNA2;CREB1;CDK2;ATM;RAN;ATR
Ras signaling pathway	37/232	0.368649	0.433387	0.999996	0	0	1.07658	1.07433	SHC1;FLT4;CALML4;PLA2G6;EFNA5;PLD2;IKBKB;RAP1B;MAPK9;RASSF1;GNGT2;AKT2;ABL2;SHOC2;PLCG1;PAK3;BRAP;RALBP1;PLA2G12A;CHUK;IGF1;GNG12;NFKB1;VEGFA;TIAM1;AFDN;GNB2;GNB1;REL;GNB4;NF1;CALM2;RGL2;FGFR3;MET;FGFR2;FGFR1
Prostate cancer	16/97	0.381117	0.418942	0.999996	0	0	1.12042	1.08082	RB1;TCF7L2;TCF7L1;CHUK;PDPK1;LEF1;BRAF;IGF1;NFKB1;IKBKB;CREB1;ZEB1;AKT2;CDK2;FGFR2;FGFR1
Pantothenate and CoA biosynthesis	2023-04-21	0.388443	0.410673	0.999996	0	0	1.3343	1.26173	ALDH3A2;PANK2;COASY;PPCDC
Huntington disease	48/306	0.39067	0.40819	0.999996	0	0	1.05557	0.992119	PSMD14;HDAC1;NDUFB5;COX4I1;ITPR1;HTT;NRF1;AMBRA1;KLC1;UQCRH;PSMD8;PSMB7;KLC4;MAPK9;ACTR1B;CASP8;SIN3A;POLR2D;POLR2G;NDUFV2;AP2M1;NDUFA7;TBP;APAF1;NDUFA5;NDUFA4;NDUFA3;GPX8;AP2B1;WIPI2;SOD2;COX6B1;PSMA6;PLCB3;PSMA3;PLCB4;PSMA4;PSMC6;CREB1;PSMA2;NDUFS6;NDUFS4;ATG2A;ULK2;MAP3K10;NDUFS1;DNAL4;DNAL1
Cellular senescence	25/156	0.39222	0.40647	0.999996	0	0	1.08254	1.01318	RB1;ITPR1;CALML4;LIN9;PPP1CB;PPP3CB;PPP3CC;AKT2;CHEK2;NBN;BTRC;E2F5;MAP2K3;SMAD2;FBXW11;TSC2;TSC1;NFKB1;MAPK12;TGFBR2;CCNA2;CDK2;ATM;CALM2;ATR
Non-small cell lung cancer	1972-12-01	0.394039	0.404461	0.999996	0	0	1.13432	1.05639	RB1;EML4;RASSF1;PDPK1;AKT2;RARB;BRAF;POLK;PLCG1;JAK3;MET;DDB2
ErbB signaling pathway	14/85	0.396317	0.401958	0.999996	0	0	1.11836	1.03509	MAP2K4;SHC1;SRC;CBLB;BRAF;PTK2;MAPK9;RPS6KB1;AKT2;ABL2;PLCG1;PAK3;CRK;CAMK2G
Lipid and atherosclerosis	34/215	0.396396	0.40187	0.999996	0	0	1.06562	0.98606	ROCK2;SRC;ITPR1;CALML4;TANK;IKBKB;RAP1B;MAPK9;PPP3CB;PPP3CC;CASP8;IRAK1;AKT2;PLCG1;JAK2;IKBKE;MAP3K7;CAMK2G;MAP2K3;MAP2K4;APAF1;CHUK;HSPA4;PDPK1;MIB2;SOD2;PTK2;NFKB1;MAPK12;PLCB3;PLCB4;FAS;TAB2;CALM2
Endocrine and other factor-regulated calcium reabsorption	1953-09-01	0.399131	0.398885	0.999996	0	0	1.16003	1.06545	DNM3;PLCB3;PLCB4;VDR;AP2B1;AP2M1;DNM1;RAB11A;DNM2
Th1 and Th2 cell differentiation	15/92	0.405724	0.391769	0.999996	0	0	1.10485	0.996668	JAG2;CHUK;IFNGR1;TYK2;RBPJ;MAPK12;NFKB1;IKBKB;MAPK9;PPP3CB;PPP3CC;PLCG1;JAK2;IL12RB1;JAK3
Nucleotide excision repair	1947-08-01	0.40864	0.388659	0.999996	0	0	1.16328	1.04105	CUL4A;DDB1;CDK7;RFC1;CCNH;ERCC8;GTF2H1;DDB2
Pyruvate metabolism	1947-08-01	0.40864	0.388659	0.999996	0	0	1.16328	1.04105	ALDH3A2;LDHA;ACSS2;PKM;ME2;ACACA;ACAT1;PCK2
TNF signaling pathway	18/112	0.414196	0.382795	0.999996	0	0	1.08605	0.957262	MAP2K3;ATF2;MAP2K4;CHUK;NFKB1;MAPK12;IKBKB;MAPK9;RPS6KA5;CASP8;CREB1;AKT2;TAB3;FAS;TAB2;DNM1L;MAP3K7;BIRC2
Colorectal cancer	14/86	0.414209	0.38278	0.999996	0	0	1.10276	0.971958	SMAD2;TCF7L2;TCF7L1;LEF1;BRAF;DDB2;TGFBR2;MAPK9;APC;RPS6KB1;AKT2;BIRC5;POLK;APPL1
Bladder cancer	1941-07-01	0.419108	0.377674	0.999996	0	0	1.16752	1.0153	RB1;RASSF1;RPS6KA5;SRC;BRAF;FGFR3;VEGFA
Glycerolipid metabolism	1961-10-01	0.433295	0.363217	0.999996	0	0	1.11192	0.92994	ALDH3A2;DGKD;GPAM;DGKA;MBOAT1;MBOAT2;GPAT3;LPIN1;PLPP1;DGKH
Coronavirus disease	36/232	0.439466	0.357074	0.999996	0	0	1.04173	0.856501	RPL5;RPL32;RPL34;RPL12;RPL9;IKBKB;RPS4X;RPS14;MAPK9;RPL18A;IRAK1;RPS18;RPL36;PLCG1;RPS2;IKBKE;RPL17;MAP3K7;RPS12;RPL19;RPS9;SYK;CHUK;RPL23;RPS5;RPSA;RPL23A;TYK2;NFKB1;MAPK12;ADAM17;TAB2;RPL29;IL6ST;RPL28;RPS24
Thermogenesis	36/232	0.439466	0.357074	0.999996	0	0	1.04173	0.856501	ATF2;COX19;KDM3A;KDM3B;KDM1A;NDUFB5;COX4I1;PRKAG2;UQCRH;RPS6KA6;DPF1;NDUFV2;MAP2K3;SMARCE1;NDUFA7;SMARCC2;NDUFA5;NDUFA4;NDUFA3;TSC2;TSC1;SMARCA2;ARID1B;MAPK12;COX6B1;CREB1;NDUFAF6;RPS6KB1;NDUFAF7;NDUFS6;NDUFAF5;AKT1S1;NDUFS4;NDUFAF2;NDUFS1;FGFR1
Synthesis and degradation of ketone bodies	2023-02-10	0.455548	0.341466	0.999996	0	0	1.4175	1.11452	HMGCS1;ACAT1
Ether lipid metabolism	1949-08-01	0.456996	0.340088	0.999996	0	0	1.10641	0.866407	PLA2G12A;GDPD3;CHPT1;PLA2G6;PAFAH1B2;PLPP1;SELENOI;PLD2
Sphingolipid metabolism	1949-08-01	0.456996	0.340088	0.999996	0	0	1.10641	0.866407	UGCG;CERS5;ASAH1;SMPD4;SGMS1;GLB1;GBA;PLPP1
Mannose type O-glycan biosynthesis	2023-04-23	0.460138	0.337112	0.999996	0	0	1.19371	0.926592	B4GALT2;POMGNT2;LARGE1;FKTN
Protein export	2023-04-23	0.460138	0.337112	0.999996	0	0	1.19371	0.926592	SEC61A2;SRP19;SRP9;SEC63
Hepatocellular carcinoma	26/168	0.463439	0.334008	0.999996	0	0	1.0383	0.798535	RB1;SHC1;LEF1;MGST2;AKT2;DPF1;DVL1;PLCG1;POLK;BRD7;SMAD2;SMARCE1;WNT10B;TCF7L2;PBRM1;TCF7L1;SMARCC2;TXNRD2;BRAF;SMARCA2;ARID1B;DDB2;TGFBR2;APC;RPS6KB1;MET
Glyoxylate and dicarboxylate metabolism	2023-05-30	0.475274	0.323056	0.999996	0	0	1.134	0.843543	GCSH;ACSS2;PCCA;ACO2;ACAT1
beta-Alanine metabolism	2023-05-30	0.475274	0.323056	0.999996	0	0	1.134	0.843543	ALDH3A2;SMOX;ACOX1;MLYCD;ACOX3
RIG-I-like receptor signaling pathway	1970-11-01	0.483837	0.315301	0.999996	0	0	1.05712	0.767479	IKBKB;MAPK9;CYLD;CASP8;CHUK;IKBKE;MAP3K7;TANK;MAPK12;NFKB1;ATG5
Thyroid cancer	1937-06-01	0.486933	0.312531	0.999996	0	0	1.0974	0.789721	TCF7L2;TCF7L1;LEF1;BRAF;POLK;DDB2
Rap1 signaling pathway	32/210	0.490292	0.309545	0.999996	0	0	1.01933	0.726533	SRC;FLT4;CTNND1;CALML4;EFNA5;RAP1B;SIPA1L1;AKT2;KRIT1;PLCG1;VASP;MAGI1;MAP2K3;BRAF;IGF1;MAPK12;VEGFA;ENAH;TIAM1;AFDN;PLCB3;PLCB4;PARD3;EVL;CALM2;RAPGEF6;FGFR3;CRK;MET;SIPA1;FGFR2;FGFR1
Circadian entrainment	15/97	0.491862	0.308157	0.999996	0	0	1.03718	0.735937	ITPR1;CALML4;CACNA1C;GNG12;PLCB3;RPS6KA5;GNGT2;CREB1;PLCB4;PER3;GNB2;GNB1;GNB4;CALM2;CAMK2G
T cell receptor signaling pathway	16/104	0.497607	0.303114	0.999996	0	0	1.03087	0.719493	CHUK;PDPK1;CBLB;NFKB1;MALT1;MAPK12;IKBKB;MAPK9;PPP3CB;PPP3CC;TEC;AKT2;FYN;PLCG1;PAK3;MAP3K7
Morphine addiction	14/91	0.503354	0.298127	0.999996	0	0	1.03085	0.70764	GABBR1;PDE2A;ARRB1;ARRB2;GNG12;GNGT2;GRK2;PDE10A;GNB2;GNB1;GNB4;GABRE;PDE7A;PDE8A
Inflammatory mediator regulation of TRP channels	15/98	0.508875	0.293389	0.999996	0	0	1.02462	0.692185	MAP2K3;IL1R1;SRC;ITPR1;CALML4;IGF1;PLA2G6;MAPK12;PPP1CB;MAPK9;PLCB3;PLCB4;PLCG1;CALM2;CAMK2G
Human cytomegalovirus infection	34/225	0.509306	0.293022	0.999996	0	0	1.00923	0.680932	RB1;ATF2;ROCK2;SRC;PXN;ITPR1;CALML4;IKBKB;PPP3CB;GNGT2;PPP3CC;CASP8;AKT2;ARHGEF11;ARHGEF12;CHUK;IL1R1;TSC2;TSC1;GNG12;PTK2;NFKB1;MAPK12;VEGFA;PLCB3;PLCB4;CREB1;RPS6KB1;GNB2;GNB1;GNB4;FAS;CALM2;CRK
Endometrial cancer	1958-09-01	0.511638	0.291037	0.999996	0	0	1.04135	0.697847	TCF7L2;TCF7L1;APC;PDPK1;AKT2;LEF1;BRAF;POLK;DDB2
Chemokine signaling pathway	29/192	0.514218	0.288853	0.999996	0	0	1.00866	0.670868	SHC1;ROCK2;SRC;PXN;ARRB1;ARRB2;PIK3R5;RAP1B;IKBKB;GRK2;GNGT2;AKT2;PLCG1;JAK2;JAK3;CCL25;CHUK;BRAF;GNG12;NFKB1;PTK2;TIAM1;PLCB3;PLCB4;PARD3;GNB2;GNB1;GNB4;CRK
Glycosphingolipid biosynthesis	1945-07-01	0.521568	0.282689	0.999996	0	0	1.04437	0.679799	B4GALT2;GLB1;HEXA;SLC33A1;GCNT2;NAGA;ST6GALNAC6
Growth hormone synthesis, secretion and action	18/119	0.523432	0.28114	0.999996	0	0	1.01036	0.654055	MAP2K3;ATF2;MAP2K4;SHC1;ITPR1;CACNA1C;IGF1;PTK2;MAPK12;GHR;MAPK9;PLCB3;CREB1;PLCB4;AKT2;PLCG1;JAK2;CRK
alpha-Linolenic acid metabolism	2023-04-25	0.52868	0.276807	0.999996	0	0	1.0799	0.688294	PLA2G12A;ACOX1;ACOX3;PLA2G6
VEGF signaling pathway	1959-09-01	0.533464	0.272895	0.999996	0	0	1.02046	0.641221	PPP3CB;PPP3CC;SRC;AKT2;PXN;PLCG1;MAPK12;PTK2;VEGFA
GnRH signaling pathway	14/93	0.538224	0.269037	0.999996	0	0	1.00463	0.622352	MAP2K3;MAP3K2;MAP2K4;SRC;ITPR1;CALML4;CACNA1C;MAPK12;PLD2;MAPK9;PLCB3;PLCB4;CAMK2G;CALM2
Thyroid hormone signaling pathway	18/121	0.553828	0.256625	0.999996	0	0	0.990623	0.58536	PFKFB2;MED1;NCOA2;PDPK1;HDAC1;SRC;NCOA3;SLC2A1;TSC2;MED16;SLC9A1;MED17;PLCB3;PLCB4;SIN3A;AKT2;PLCG1;PFKP
TGF-beta signaling pathway	14/94	0.555366	0.255421	0.999996	0	0	0.992018	0.583434	ACVR1;SMAD2;SMURF2;CHRD;INHBA;ACVR1B;SMAD6;LTBP1;TGFBR2;SMAD7;TFDP1;RPS6KB1;E2F5;BMPR1A
Axon guidance	27/182	0.556231	0.254745	0.999996	0	0	0.98737	0.579163	ROCK2;SRC;SEMA3E;SEMA3F;EFNA5;PPP3CB;PPP3CC;ABLIM2;FYN;PLCG1;SRGAP3;LRIG2;PAK3;CAMK2G;PLXNA3;SEMA6C;ARHGEF12;SEMA4D;PDPK1;LIMK2;LIMK1;SEMA4C;PTK2;SSH1;ENAH;PARD3;MET
Cushing syndrome	23/155	0.556485	0.254546	0.999996	0	0	0.987666	0.578886	RB1;ATF2;SCARB1;USP8;WNT10B;TCF7L2;TCF7L1;KMT2A;LEF1;ITPR1;ARNT;BRAF;CACNA1C;PBX1;RAP1B;PLCB3;CREB1;PLCB4;APC;DVL1;CDK2;PDE8A;CAMK2G
Folate biosynthesis	2023-04-26	0.561308	0.250799	0.999996	0	0	1.03075	0.595243	GCH1;PCBD2;GPHN;PTS
Insulin resistance	16/108	0.562389	0.249963	0.999996	0	0	0.985818	0.567399	CRTC2;PDPK1;OGA;SLC2A1;PRKAG2;NFKB1;PPP1CB;IKBKB;MAPK9;RPS6KA6;CREB1;RPS6KB1;AKT2;MLX;OGT;PCK2
Base excision repair	1933-05-01	0.56429	0.248497	0.999996	0	0	1.01232	0.579237	POLB;SMUG1;MBD4;MPG;NEIL1
Oocyte meiosis	19/129	0.571794	0.242761	0.999996	0	0	0.979039	0.54726	FBXW11;ITPR1;CALML4;IGF1;MAPK12;AURKA;PPP1CB;RPS6KA6;PPP3CB;SLK;PPP3CC;PTTG1;CDC26;CDK2;SPDYA;BTRC;CPEB3;CALM2;CAMK2G
Glioma	1975-11-01	0.581379	0.235541	0.999996	0	0	0.974246	0.528385	RB1;SHC1;AKT2;BRAF;CALML4;POLK;PLCG1;IGF1;CAMK2G;CALM2;DDB2
GABAergic synapse	13/89	0.586481	0.231746	0.999996	0	0	0.969546	0.517365	GABBR1;SRC;CACNA1C;GNG12;GPHN;GLS;TRAK2;GNGT2;GNB2;GNB1;GNB4;GABRE;SLC38A2
Fatty acid elongation	2023-04-27	0.59266	0.227194	0.999996	0	0	0.985875	0.515745	TECR;PPT2;HACD2;HACD4
Valine, leucine and isoleucine degradation	1948-07-01	0.593719	0.226419	0.999996	0	0	0.967784	0.504553	MCCC2;ALDH3A2;AUH;HMGCS1;PCCA;DBT;ACAT1
One carbon pool by folate	2023-03-20	0.594963	0.22551	0.999996	0	0	1.00039	0.51946	MTHFD2L;MTHFR;TYMS
Adipocytokine signaling pathway	1969-10-01	0.59822	0.223139	0.999996	0	0	0.960698	0.493603	IKBKB;MAPK9;CHUK;AKT2;SLC2A1;PRKAG2;JAK2;NFKB1;CAMKK2;PCK2
Amphetamine addiction	1969-10-01	0.59822	0.223139	0.999996	0	0	0.960698	0.493603	PPP1CB;ATF2;PPP3CB;PPP3CC;CREB1;HDAC1;CALML4;CACNA1C;CAMK2G;CALM2
FoxO signaling pathway	19/131	0.600302	0.22163	0.999996	0	0	0.961442	0.490646	CHUK;PDPK1;BNIP3;SETD7;PRKAG2;BRAF;CSNK1E;IGF1;SOD2;MAPK12;TGFBR2;IKBKB;MAPK9;AKT2;CDK2;ATM;SGK3;SKP2;PCK2
Non-homologous end-joining	2023-02-13	0.601605	0.220689	0.999996	0	0	1.03073	0.523769	DCLRE1C;POLM
Tuberculosis	26/180	0.614319	0.211606	0.999996	0	0	0.95671	0.466148	SRC;CALML4;MALT1;MAPK9;PPP3CB;CASP8;PPP3CC;LAMP1;IRAK1;AKT2;ATP6V1H;JAK2;CAMK2G;ATP6V0B;ARHGEF12;APAF1;ATP6AP1;SYK;VDR;IFNGR1;RIPK2;NFYB;NFKB1;MAPK12;CREB1;CALM2
Measles	20/139	0.616005	0.210416	0.999996	0	0	0.952437	0.461456	CSNK2A1;APAF1;CHUK;CSNK2A2;CBLB;EIF2AK4;TYK2;NFKB1;IKBKB;MAPK9;CASP8;IRAK1;AKT2;CDK2;RACK1;FAS;TAB2;MAP3K7;IKBKE;JAK3
Sphingolipid signaling pathway	17/119	0.625251	0.203946	0.999996	0	0	0.9445	0.44354	ABCC1;CERS5;ASAH1;SGMS1;PDPK1;ROCK2;PPP2R2A;PPP2R3A;NFKB1;MAPK12;PLD2;MAPK9;PLCB3;PLCB4;AKT2;PPP2R2D;FYN
GnRH secretion	1964-09-01	0.636248	0.196374	0.999996	0	0	0.927419	0.419349	PLCB3;GABBR1;PLCB4;AKT2;ITPR1;ARRB1;ARRB2;CACNA1C;KCNN4
Glutathione metabolism	1957-08-01	0.637085	0.195802	0.999996	0	0	0.925334	0.417188	GPX4;GSS;IDH2;GPX8;SMS;MGST2;CHAC2;PRDX6
Fatty acid degradation	1943-06-01	0.641026	0.193124	0.999996	0	0	0.919118	0.408718	ALDH3A2;GCDH;ACOX1;ECI2;ACOX3;ACAT1
Porphyrin and chlorophyll metabolism	1943-06-01	0.641026	0.193124	0.999996	0	0	0.919118	0.408718	FECH;UROS;GUSB;CP;HMOX2;BLVRA
Retrograde endocannabinoid signaling	21/148	0.643597	0.191386	0.999996	0	0	0.936934	0.412891	NDUFA7;NDUFA5;NDUFB5;NDUFA4;NDUFA3;ITPR1;CACNA1C;GNG12;MAPK12;MAPK9;PLCB3;GNGT2;PLCB4;NDUFS6;GNB2;GNB1;NDUFS4;GNB4;NDUFS1;NDUFV2;GABRE
AGE-RAGE signaling pathway in diabetic complications	14/100	0.652535	0.185396	0.999996	0	0	0.922481	0.393799	SMAD2;FN1;NFKB1;MAPK12;TGFBR2;VEGFA;DIAPH1;MAPK9;PLCB3;COL3A1;PLCB4;AKT2;PLCG1;JAK2
Cortisol synthesis and secretion	1965-09-01	0.655261	0.183586	0.999996	0	0	0.910804	0.385017	ATF2;SCARB1;PLCB3;CREB1;PLCB4;ITPR1;CACNA1C;PDE8A;PBX1
Apoptosis	20/142	0.655442	0.183466	0.999996	0	0	0.928852	0.39239	DFFB;APAF1;CHUK;PDPK1;ITPR1;HTRA2;XIAP;PTPN13;NFKB1;IKBKB;MAPK9;CASP8;AKT2;IL3RA;BIRC5;FAS;ATM;BIRC6;SPTAN1;BIRC2
Arginine biosynthesis	2023-03-22	0.661721	0.179325	0.999996	0	0	0.894983	0.369548	GLUD1;ARG2;GLS
Histidine metabolism	2023-03-22	0.661721	0.179325	0.999996	0	0	0.894983	0.369548	ALDH3A2;CARNMT1;AMDHD1
Amyotrophic lateral sclerosis	52/364	0.671197	0.17315	0.999996	0	0	0.943841	0.376302	NUP188;COX4I1;NXT2;PSMD8;PPP3CB;ACTR1B;PPP3CC;SPG11;NDC1;MAP2K3;APAF1;GPX8;WIPI2;COX6B1;NUP93;PSMA6;PSMA3;PSMA4;ALS2;PSMA2;NDUFS6;NDUFS4;ULK2;SRSF3;MATR3;NDUFS1;NUP98;SRSF7;OPTN;PSMD14;NDUFB5;AMBRA1;KLC1;TANK;UQCRH;PSMB7;KLC4;ATXN2;NDUFV2;HNRNPA1;NDUFA7;NDUFA5;NDUFA4;NDUFA3;NUP153;MAPK12;PSMC6;VAPB;HNRNPA2B1;ATG2A;DNAL4;DNAL1
Aminoacyl-tRNA biosynthesis	1966-09-01	0.67369	0.17154	0.999996	0	0	0.894772	0.353422	LARS2;AARS2;DARS2;TARS2;CARS2;FARS2;PSTK;WARS2;FARSB
Pentose phosphate pathway	2023-04-30	0.678251	0.16861	0.999996	0	0	0.871966	0.338531	RPE;IDNK;ALDOA;PFKP
Apelin signaling pathway	19/137	0.680473	0.167189	0.999996	0	0	0.912231	0.35118	SMAD2;HDAC4;HDAC5;ITPR1;PRKAG2;CALML4;NRF1;GNG12;PIK3R5;SLC9A1;PLCB3;GNGT2;PLCB4;RPS6KB1;AKT2;GNB2;GNB1;GNB4;CALM2
Pathways of neurodegeneration	68/475	0.682058	0.166179	0.999996	0	0	0.94591	0.361944	COX4I1;PARK7;CALML4;PSMD8;PPP3CB;ACTR1B;PPP3CC;CASP8;SPG11;MAP2K3;CSNK2A1;APAF1;CSNK2A2;GPX8;WIPI2;CSNK1E;COX6B1;PSMA6;PLCB3;PSMA3;PLCB4;PSMA4;ALS2;PSMA2;NDUFS6;NDUFS4;ULK2;NDUFS1;OPTN;PSMD14;NDUFB5;ITPR1;HTT;HTRA2;AMBRA1;CACNA1C;KLC1;UBE2J2;TANK;UQCRH;PSMB7;ATXN3;KLC4;MAPK9;ATXN2;ATXN1;DVL1;PLCG1;NDUFV2;CAMK2G;WNT10B;TRAP1;NDUFA7;NDUFA5;NDUFA4;NDUFA3;BRAF;NFKB1;MAPK12;PSMC6;APC;VAPB;ATG2A;MAP3K1…
Proximal tubule bicarbonate reclamation	2023-03-23	0.691959	0.15992	0.999996	0	0	0.850184	0.313062	GLUD1;GLS;PCK2
Platelet activation	17/124	0.693809	0.15876	0.999996	0	0	0.900098	0.329039	VASP;ARHGEF12;PPP1R12A;SYK;ROCK2;SRC;SNAP23;ITPR1;MAPK12;PIK3R5;PPP1CB;RAP1B;PLCB3;COL3A1;PLCB4;AKT2;FYN
RNA polymerase	1931-04-01	0.703811	0.152544	0.999996	0	0	0.839622	0.294913	POLR3B;POLR3GL;POLR2D;POLR2G
Fc epsilon RI signaling pathway	1968-09-01	0.708722	0.149524	0.999996	0	0	0.864339	0.297584	MAP2K3;MAP2K4;MAPK9;SYK;PDPK1;AKT2;FYN;PLCG1;MAPK12
Alzheimer disease	52/369	0.70968	0.148937	0.999996	0	0	0.928676	0.318481	COX4I1;CALML4;PSMD8;IKBKB;PPP3CB;PPP3CC;CASP8;AKT2;CSNK2A1;APAF1;CHUK;CSNK2A2;CSNK1E;WIPI2;COX6B1;PSMA6;PLCB3;PSMA3;ADAM17;PLCB4;PSMA4;PSMA2;NDUFS6;NDUFS4;ULK2;NDUFS1;PSMD14;NDUFB5;ITPR1;CACNA1C;AMBRA1;KLC1;RTN4;UQCRH;PSMB7;KLC4;MAPK9;DVL1;NAE1;NDUFV2;WNT10B;NDUFA7;NDUFA5;NDUFA4;NDUFA3;BRAF;NFKB1;PSMC6;APC;ATG2A;FAS;CALM2
Toll-like receptor signaling pathway	14/104	0.710509	0.14843	0.999996	0	0	0.881273	0.301196	MAP2K3;MAP2K4;CHUK;NFKB1;MAPK12;IKBKB;MAPK9;CASP8;IRAK1;AKT2;TAB2;IRF5;MAP3K7;IKBKE
Vitamin digestion and absorption	2023-03-24	0.720109	0.142602	0.999996	0	0	0.809651	0.265851	SCARB1;ABCC1;LMBRD1
Renin secretion	1969-09-01	0.725298	0.139484	0.999996	0	0	0.849883	0.272959	PPP3CB;PLCB3;PPP3CC;CREB1;PLCB4;ITPR1;CALML4;CACNA1C;CALM2
Non-alcoholic fatty liver disease	21/155	0.726726	0.138629	0.999996	0	0	0.887621	0.283334	NDUFA7;NDUFA5;NDUFB5;NDUFA4;COX4I1;NDUFA3;PRKAG2;UQCRH;NFKB1;MAPK12;COX6B1;IKBKB;MAPK9;CASP8;NDUFS6;AKT2;NDUFS4;MLX;FAS;NDUFS1;NDUFV2
Phospholipase D signaling pathway	20/148	0.727585	0.138116	0.999996	0	0	0.884997	0.28145	DGKD;SYK;SHC1;DGKA;TSC2;TSC1;DNM1;PIK3R5;PLD2;DNM2;DNM3;PLCB3;PLCB4;AKT2;PIP5K1A;FYN;PLCG1;PLPP1;CYTH1;DGKH
Cholinergic synapse	15/113	0.734856	0.133798	0.999996	0	0	0.867022	0.267113	ITPR1;CACNA1C;GNG12;PIK3R5;PLCB3;GNGT2;CREB1;PLCB4;AKT2;GNB2;GNB1;GNB4;FYN;JAK2;CAMK2G
Human papillomavirus infection	46/331	0.736056	0.133089	0.999996	0	0	0.913654	0.279989	RB1;HDAC1;PXN;TNC;UBR4;PPP2R2A;UBE3A;RBPJ;IKBKB;CASP8;AKT2;DVL1;ATP6V1H;IKBKE;MAGI1;WNT10B;TCF7L2;ATP6V0B;TCF7L1;TBP;ATP6AP1;CHUK;FN1;TSC2;SCRIB;TSC1;TYK2;PPP2R3A;TUBG1;PTK2;NFKB1;VEGFA;CCNA2;CREB1;PKM;APC;RPS6KB1;PARD3;CDK2;TADA3;PPP2R2D;FAS;ATM;ITGA6;LLGL2;ATR
Prolactin signaling pathway	1970-09-01	0.741234	0.130045	0.999996	0	0	0.835901	0.250301	MAPK9;SHC1;SRC;AKT2;JAK2;SOCS6;MAPK12;NFKB1;SOCS5
Basal cell carcinoma	1963-08-01	0.747134	0.126601	0.999996	0	0	0.824097	0.240233	TCF7L2;WNT10B;TCF7L1;APC;LEF1;DVL1;POLK;DDB2
Glutamatergic synapse	15/114	0.747246	0.126537	0.999996	0	0	0.858214	0.25005	ITPR1;CACNA1C;GNG12;GLS;PLD2;PPP3CB;PLCB3;GRK2;GNGT2;PPP3CC;PLCB4;GNB2;GNB1;GNB4;SLC38A2
Adrenergic signaling in cardiomyocytes	20/150	0.749434	0.125266	0.999996	0	0	0.871278	0.251309	ATF2;TPM1;CREM;PPP2R2A;CALML4;CACNA1C;PPP2R3A;MAPK12;PIK3R5;SLC9A1;PPP1CB;PLCB3;RPS6KA5;CREB1;PLCB4;AKT2;TNNT2;PPP2R2D;CALM2;CAMK2G
Purine metabolism	17/129	0.754523	0.122328	0.999996	0	0	0.859661	0.242141	PDE2A;AK4;AK5;NTPCR;AMPD3;NT5C2;PAPSS1;NT5C;NUDT9;DGUOK;NT5C3B;PKM;PDE10A;NME6;IMPDH1;PDE7A;PDE8A
Insulin secretion	1986-11-01	0.76054	0.118878	0.999996	0	0	0.830817	0.227417	RIMS2;ATF2;KCNU1;PLCB3;CREB1;PLCB4;SLC2A1;CACNA1C;KCNN4;CAMK2G;TRPM4
IL-17 signaling pathway	1994-12-01	0.769333	0.113885	0.999996	0	0	0.828909	0.217366	IKBKB;FOSL1;MAPK9;CASP8;CHUK;TAB3;TAB2;ELAVL1;IKBKE;MAP3K7;MAPK12;NFKB1
Cysteine and methionine metabolism	1950-06-01	0.780695	0.107519	0.999996	0	0	0.772575	0.191267	LDHA;GSS;CTH;APIP;DNMT3B;SMS
Breast cancer	19/147	0.791849	0.101358	0.999996	0	0	0.840465	0.196152	RB1;JAG2;WNT10B;TCF7L2;TCF7L1;SHC1;FLT4;NCOA3;LEF1;BRAF;IGF1;BRCA1;DDB2;APC;RPS6KB1;AKT2;DVL1;POLK;FGFR1
Vascular smooth muscle contraction	17/133	0.796999	0.0985423	0.999996	0	0	0.829821	0.188288	ARHGEF11;PLA2G12A;ARHGEF12;PPP1R12A;ROCK2;ITPR1;BRAF;CALML4;CACNA1C;PLA2G6;PPP1CB;MYL6;KCNU1;PLCB3;PLCB4;CALD1;CALM2
PPAR signaling pathway	1974-09-01	0.798557	0.0976943	0.999996	0	0	0.784276	0.176422	SCP2;HMGCS1;PDPK1;ACOX1;PLIN4;ACOX3;SORBS1;PPARD;PCK2
Parkinson disease	33/249	0.804854	0.0942828	0.999996	0	0	0.86459	0.187698	PSMD14;NDUFB5;COX4I1;ITPR1;HTRA2;CALML4;PARK7;UBE2J2;KLC1;UQCRH;PSMD8;PSMB7;KLC4;MAPK9;PLCG1;NDUFV2;CAMK2G;TRAP1;NDUFA7;APAF1;NDUFA5;NDUFA4;NDUFA3;COX6B1;PSMA6;PSMA3;PSMA4;PSMC6;PSMA2;NDUFS6;NDUFS4;NDUFS1;CALM2
DNA replication	1936-04-01	0.809474	0.0917969	0.999996	0	0	0.708222	0.149697	POLA1;RNASEH2B;RFC1;MCM4
Gastric cancer	19/149	0.810472	0.0912618	0.999996	0	0	0.827437	0.173876	RB1;SMAD2;WNT10B;TCF7L2;TCF7L1;SHC1;LEF1;BRAF;DDB2;TGFBR2;APC;RPS6KB1;AKT2;DVL1;CDK2;RARB;POLK;MET;FGFR2
Phototransduction	2023-03-28	0.812928	0.0899482	0.999996	0	0	0.679947	0.140826	GNB1;CALML4;CALM2
Parathyroid hormone synthesis, secretion and action	13/106	0.821804	0.0852318	0.999996	0	0	0.791522	0.155339	ARHGEF11;ATF2;VDR;ITPR1;BRAF;ARRB1;ARRB2;RUNX2;PLD2;PLCB3;CREB1;PLCB4;FGFR1
Prion disease	36/273	0.82266	0.0847797	0.999996	0	0	0.85941	0.167767	ATF2;PSMD14;NDUFB5;COX4I1;ITPR1;CACNA1C;KLC1;UQCRH;PSMD8;PSMB7;KLC4;MAPK9;PPP3CB;PPP3CC;FYN;NCAM1;NDUFV2;NDUFA7;CSNK2A1;APAF1;NDUFA5;CAV2;NDUFA4;NDUFA3;CSNK2A2;MAPK12;COX6B1;PSMA6;PSMA3;PSMA4;PSMC6;CREB1;PSMA2;NDUFS6;NDUFS4;NDUFS1
Glycosaminoglycan biosynthesis	1953-06-01	0.826251	0.0828883	0.999996	0	0	0.723134	0.138015	B4GALT2;EXT2;EXTL2;FUT8;EXTL3;HS6ST2
Taurine and hypotaurine metabolism	2023-01-11	0.832629	0.0795487	0.999996	0	0	0.566744	0.103809	CSAD
NOD-like receptor signaling pathway	23/181	0.83395	0.0788598	0.999996	0	0	0.823867	0.149599	CHUK;RIPK2;NEK7;ITPR1;ERBIN;XIAP;TYK2;TANK;NFKB1;MAPK12;IKBKB;MAPK9;PLCB3;CASP8;PLCB4;TAB3;TAB2;RBCK1;DNM1L;MAP3K7;IKBKE;BIRC2;ATG5
Progesterone-mediated oocyte maturation	12/100	0.836822	0.0773667	0.999996	0	0	0.772119	0.137548	CCNA2;MAPK9;RPS6KA6;AKT2;CDC26;CDK2;SPDYA;BRAF;IGF1;CPEB3;MAPK12;AURKA
Oxytocin signaling pathway	19/154	0.851737	0.0696946	0.999996	0	0	0.796555	0.127829	PPP1R12A;ROCK2;SRC;ITPR1;PRKAG2;CALML4;CACNA1C;PIK3R5;CAMKK2;PPP1CB;MYL6;PPP3CB;PLCB3;EEF2K;PPP3CC;PLCB4;CALM2;CAMK2G;MAP2K5
Other types of O-glycan biosynthesis	1947-05-01	0.853179	0.0689597	0.999996	0	0	0.674325	0.107073	B4GALT2;GALNT1;B3GLCT;COLGALT1;OGT
Oxidative phosphorylation	16/133	0.862013	0.0644859	0.999996	0	0	0.774027	0.114931	ATP6V0B;NDUFA7;ATP6AP1;NDUFA5;NDUFB5;NDUFA4;COX4I1;NDUFA3;UQCRH;COX6B1;PPA2;NDUFS6;NDUFS4;ATP6V1H;NDUFS1;NDUFV2
Galactose metabolism	2023-03-31	0.864144	0.0634141	0.999996	0	0	0.606988	0.0886302	B4GALT2;GLB1;PFKP
Melanoma	1972-08-01	0.864507	0.0632312	0.999996	0	0	0.707832	0.103057	RB1;AKT2;BRAF;POLK;IGF1;MET;DDB2;FGFR1
B cell receptor signaling pathway	1981-09-01	0.875227	0.0578792	0.999996	0	0	0.707734	0.094321	IKBKB;PPP3CB;PPP3CC;CHUK;SYK;AKT2;INPPL1;MALT1;NFKB1
Mismatch repair	2023-02-23	0.879601	0.0557143	0.999996	0	0	0.539587	0.0692219	RFC1;PMS2
Renin-angiotensin system	2023-02-23	0.879601	0.0557143	0.999996	0	0	0.539587	0.0692219	CTSA;ATP6AP2
Diabetic cardiomyopathy	25/203	0.881781	0.0546394	0.999996	0	0	0.794479	0.0999549	NDUFB5;COX4I1;SLC2A1;UQCRH;PPP1CB;MAPK9;MPC1;AKT2;NDUFV2;CAMK2G;SMAD2;NDUFA7;NDUFA5;NDUFA4;NDUFA3;NFKB1;MAPK12;COX6B1;TGFBR2;PLCB3;COL3A1;PLCB4;NDUFS6;NDUFS4;NDUFS1
Aldosterone synthesis and secretion	1998-11-01	0.886384	0.0523781	0.999996	0	0	0.715713	0.0863186	ATF2;SCARB1;PLCB3;CREB1;PLCB4;PDE2A;ITPR1;CALML4;CACNA1C;CALM2;CAMK2G
Vibrio cholerae infection	1950-05-01	0.888013	0.0515805	0.999996	0	0	0.629259	0.074736	SEC61A2;ATP6V0B;ATP6AP1;ATP6V1H;PLCG1
Leukocyte transendothelial migration	13/114	0.889969	0.0506253	0.999996	0	0	0.728482	0.0849184	VASP;ROCK2;ACTN1;CTNND1;PXN;ARHGAP5;PTK2;MAPK12;RAP1B;MYLPF;AFDN;PLCG1;SIPA1
Tryptophan metabolism	1942-04-01	0.893376	0.0489655	0.999996	0	0	0.596187	0.0672184	ALDH3A2;GCDH;DLST;ACAT1
Viral myocarditis	1960-06-01	0.903362	0.0441381	0.999996	0	0	0.629135	0.06394	CASP8;ABL2;FYN;EIF4G3;EIF4G2;EIF4G1
Fat digestion and absorption	1943-04-01	0.903653	0.0439981	0.999996	0	0	0.580866	0.0588471	SCARB1;PLA2G12A;PLPP1;ACAT1
Melanogenesis	11/101	0.907539	0.0421345	0.999996	0	0	0.691734	0.0671108	WNT10B;TCF7L2;PLCB3;TCF7L1;CREB1;PLCB4;DVL1;LEF1;CALML4;CALM2;CAMK2G
Leishmaniasis	1977-08-01	0.907697	0.0420592	0.999996	0	0	0.656346	0.0635638	EEF1A1;IRAK1;IFNGR1;TAB2;JAK2;MAP3K7;MAPK12;NFKB1
Synaptic vesicle cycle	1978-08-01	0.914764	0.0386911	0.999996	0	0	0.646931	0.0576349	DNM3;ATP6V0B;UNC13A;ATP6V1H;AP2B1;AP2M1;DNM1;DNM2
Cytosolic DNA-sensing pathway	1963-06-01	0.92608	0.0333517	0.999996	0	0	0.595917	0.0457635	IKBKB;CHUK;POLR3B;POLR3GL;IKBKE;NFKB1
cGMP-PKG signaling pathway	19/167	0.927086	0.0328799	0.999996	0	0	0.726027	0.0549665	VASP;ATF2;PPP1R12A;ROCK2;PDE2A;ITPR1;CALML4;CACNA1C;PIK3R5;PPP1CB;PPP3CB;KCNU1;PLCB3;PPP3CC;CREB1;PLCB4;AKT2;CALM2;GTF2I
Type II diabetes mellitus	1946-04-01	0.929407	0.0317941	0.999996	0	0	0.53928	0.0394799	IKBKB;MAPK9;PKM;CACNA1C
African trypanosomiasis	1937-03-01	0.930916	0.0310895	0.999996	0	0	0.499696	0.0357713	PLCB3;PLCB4;FAS
Aldosterone-regulated sodium reabsorption	1937-03-01	0.930916	0.0310895	0.999996	0	0	0.499696	0.0357713	PDPK1;NEDD4L;IGF1
Nitrogen metabolism	2023-01-17	0.936898	0.0283078	0.999996	0	0	0.35409	0.02308	GLUD1
Primary bile acid biosynthesis	2023-01-17	0.936898	0.0283078	0.999996	0	0	0.35409	0.02308	SCP2
Butanoate metabolism	2023-02-28	0.937293	0.0281245	0.999996	0	0	0.435692	0.028215	HMGCS1;ACAT1
Primary immunodeficiency	1938-03-01	0.938528	0.0275528	0.999996	0	0	0.48539	0.0307944	DCLRE1C;AIRE;JAK3
Linoleic acid metabolism	2029-02-01	0.945123	0.0245116	0.999996	0	0	0.419531	0.0236783	PLA2G12A;PLA2G6
Fatty acid biosynthesis	2023-01-18	0.946368	0.0239401	0.999996	0	0	0.333242	0.0183697	ACACA
PI3K-Akt signaling pathway	43/354	0.947235	0.0235421	0.999996	0	0	0.780656	0.0423176	ATF2;CRTC2;FLT4;TNC;PPP2R2A;BRCA1;EFNA5;PIK3R5;IKBKB;GHR;GNGT2;AKT2;JAK2;JAK3;PCK2;MAGI1;SYK;CHUK;PDPK1;FN1;TSC2;TSC1;IGF1;PPP2R3A;GNG12;PTK2;NFKB1;VEGFA;CREB1;RPS6KB1;GNB2;CDK2;GNB1;IL3RA;PPP2R2D;GNB4;SGK3;ITGA6;EIF4E2;FGFR3;MET;FGFR2;FGFR1
Gastric acid secretion	1976-07-01	0.950475	0.0220593	0.999996	0	0	0.574111	0.029161	PLCB3;PLCB4;ITPR1;CALML4;CAMK2G;CALM2;SLC9A1
Ascorbate and aldarate metabolism	1930-02-01	0.952016	0.0213559	0.999996	0	0	0.404524	0.019892	ALDH3A2;GUSB
Amoebiasis	10/102	0.953184	0.0208232	0.999996	0	0	0.6149	0.0294828	ARG2;PLCB3;COL3A1;PLCB4;IL1R1;ACTN1;FN1;RAB7B;NFKB1;PTK2
Cholesterol metabolism	1950-04-01	0.954055	0.0204268	0.999996	0	0	0.49227	0.0231536	SCARB1;SOAT1;NPC2;VAPB
Necroptosis	17/159	0.954438	0.0202523	0.999996	0	0	0.676838	0.0315628	IFNGR1;FAF1;SPATA2;XIAP;TYK2;CYLD;GLUD1;MAPK9;CASP8;CHMP3;FAS;RBCK1;DNM1L;JAK2;JAK3;CAMK2G;BIRC2
Long-term depression	1960-05-01	0.957755	0.0187457	0.999996	0	0	0.514544	0.0222096	PLCB3;PLCB4;ITPR1;BRAF;IGF1
Mineral absorption	1960-05-01	0.957755	0.0187457	0.999996	0	0	0.514544	0.0222096	VDR;SLC11A2;STEAP1;TRPM6;HMOX2
Cardiac muscle contraction	1987-08-01	0.959982	0.017737	0.999996	0	0	0.572926	0.0233988	ASPH;COX4I1;TNNT2;TPM1;CACNA1C;UQCRH;COX6B1;SLC9A1
Estrogen signaling pathway	14/137	0.960348	0.0175715	0.999996	0	0	0.643576	0.026039	ATF2;NCOA2;GABBR1;SHC1;SRC;NCOA3;ITPR1;CALML4;PLCB3;CREB1;PLCB4;AKT2;CALM2;EBAG9
Alcoholism	20/186	0.9631	0.0163288	0.999996	0	0	0.680871	0.0255996	HDAC4;ATF2;HDAC5;SHC1;HDAC1;BRAF;CALML4;GNG12;HDAC8;CAMKK2;HDAC7;PPP1CB;GNGT2;CREB1;GNB2;HAT1;GNB1;GNB4;SLC29A1;CALM2
Hepatitis C	16/157	0.969688	0.013368	0.999996	0	0	0.641365	0.0197418	RB1;SCARB1;APAF1;CHUK;PPP2R2A;BRAF;EIF2AK4;TYK2;NFKB1;IKBKB;CASP8;AKT2;CDK2;PPP2R2D;FAS;IKBKE
Vasopressin-regulated water reabsorption	1944-03-01	0.970091	0.0131875	0.999996	0	0	0.414211	0.0125776	DYNC1LI2;CREB1;RAB11A
Pentose and glucuronate interconversions	1934-02-01	0.97216	0.0122623	0.999996	0	0	0.353875	0.00999163	RPE;GUSB
ABC transporters	1945-03-01	0.973554	0.0116399	0.999996	0	0	0.404325	0.0108366	ABCD4;ABCC1;ABCC5
Thyroid hormone synthesis	1975-06-01	0.976704	0.0102371	0.999996	0	0	0.49193	0.0115957	ATF2;PLCB3;CREB1;PLCB4;GPX8;ITPR1
Pertussis	1976-06-01	0.978952	0.00923863	0.999996	0	0	0.484874	0.0103146	MAPK9;IRAK1;CALML4;CALM2;MAPK12;NFKB1
Carbohydrate digestion and absorption	1947-03-01	0.979371	0.00905287	0.999996	0	0	0.385901	0.0080441	PLCB3;PLCB4;AKT2
Serotonergic synapse	10/113	0.981292	0.00820187	0.999996	0	0	0.548873	0.0103657	PLCB3;GNGT2;PLCB4;GNB2;GNB1;ITPR1;GNB4;BRAF;CACNA1C;GNG12
Alanine, aspartate and glutamate metabolism	1937-02-01	0.981619	0.00805683	0.999996	0	0	0.323485	0.00600115	GLUD1;GLS
Cocaine addiction	1949-03-01	0.983954	0.00702531	0.999996	0	0	0.369079	0.00597036	ATF2;CREB1;NFKB1
ECM-receptor interaction	1988-07-01	0.984085	0.00696733	0.999996	0	0	0.488711	0.00784032	TNC;FN1;SDC1;ITGA6;CD47;NPNT;CD44
Gap junction	1988-07-01	0.984085	0.00696733	0.999996	0	0	0.488711	0.00784032	MAP3K2;PLCB3;PLCB4;SRC;ITPR1;CSNK1D;MAP2K5
Glycine, serine and threonine metabolism	1940-02-01	0.987925	0.00527583	0.999996	0	0	0.297894	0.00361883	GCSH;CTH
JAK-STAT signaling pathway	15/162	0.988744	0.00491624	0.999996	0	0	0.576339	0.00652419	PIAS4;IL15RA;IFNGR1;STAM;TYK2;PIAS2;GHR;AKT2;IL3RA;IL6ST;SOCS6;JAK2;IL12RB1;JAK3;SOCS5
Influenza A	16/172	0.990027	0.00435304	0.999996	0	0	0.579179	0.00580526	APAF1;CHUK;IFNGR1;TYK2;NXT2;NFKB1;PML;RAB11A;IKBKB;CASP8;AKT2;KPNA6;FAS;NUP98;JAK2;IKBKE
Neutrophil extracellular trap formation	18/189	0.990192	0.00428077	0.999996	0	0	0.59429	0.00585782	HDAC4;HDAC5;SYK;HDAC1;SRC;CLCN3;HDAC8;NFKB1;MAPK12;HDAC7;PLCB3;CLCN5;PLCB4;CLCN4;AKT2;HAT1;PLCG1;MAP3K7
Salivary secretion	1993-07-01	0.990372	0.00420148	0.999996	0	0	0.460161	0.00445172	PLCB3;PLCB4;ITPR1;CALML4;KCNN4;CALM2;SLC9A1
cAMP signaling pathway	21/216	0.991597	0.00366487	0.999996	0	0	0.607749	0.0051286	GABBR1;PPP1R12A;ROCK2;BRAF;CALML4;CACNA1C;NFKB1;PLD2;SLC9A1;PPP1CB;RAP1B;TIAM1;AFDN;MAPK9;CREB1;PDE10A;ACOX1;AKT2;ACOX3;CALM2;CAMK2G
Inflammatory bowel disease	1965-04-01	0.991851	0.00355345	0.999996	0	0	0.370891	0.00303468	SMAD2;IFNGR1;IL12RB1;NFKB1
Type I diabetes mellitus	1943-02-01	0.992102	0.00344347	0.999996	0	0	0.276048	0.00218876	ICA1;FAS
Arrhythmogenic right ventricular cardiomyopathy	1977-05-01	0.993364	0.00289175	0.999996	0	0	0.39266	0.00261453	TCF7L2;TCF7L1;LEF1;ITGA6;CACNA1C
Phagosome	13/152	0.993808	0.00269757	0.999996	0	0	0.528139	0.00328048	SCARB1;ATP6V0B;TFRC;ATP6AP1;STX7;SEC61A2;DYNC1LI2;PIKFYVE;LAMP1;HGS;ATP6V1H;RAB7B;SEC22B
Drug metabolism	8/108	0.99454	0.00237763	0.999996	0	0	0.452049	0.00247483	CDA;DUT;NME6;IMPDH1;MGST2;TK1;GUSB;UCKL1
Hypertrophic cardiomyopathy	1990-06-01	0.995257	0.00206495	0.999996	0	0	0.403728	0.00191961	TNNT2;TPM1;PRKAG2;ITGA6;CACNA1C;IGF1
Intestinal immune network for IgA production	1948-02-01	0.99614	0.00167972	0.999996	0	0	0.245971	0.00095134	CCL25;IL15RA
Pancreatic secretion	7/102	0.996245	0.00163366	0.999996	0	0	0.416345	0.00156614	RAP1B;PLA2G12A;PLCB3;PLCB4;ITPR1;RAB11A;SLC9A1
Arachidonic acid metabolism	1961-03-01	0.996619	0.00147105	0.999996	0	0	0.292511	0.0009908	PLA2G12A;GPX8;PLA2G6
Protein digestion and absorption	7/103	0.996627	0.00146718	0.999996	0	0	0.411984	0.00139181	COL18A1;COL3A1;COL16A1;COL5A1;COL7A1;KCNN4;SLC38A2
Malaria	1950-02-01	0.997108	0.00125775	0.999996	0	0	0.235694	0.000682588	SDC1;MET
Mucin type O-glycan biosynthesis	1936-01-01	0.99713	0.00124842	0.999996	0	0	0.161689	0.000464788	GALNT1
Tyrosine metabolism	1936-01-01	0.99713	0.00124842	0.999996	0	0	0.161689	0.000464788	COMT
Chemical carcinogenesis	22/239	0.997149	0.00123982	0.999996	0	0	0.571583	0.00163174	RB1;ATF2;VDR;SRC;EPHX1;MGST2;XIAP;ARNT;ARRB1;CACNA1C;ARRB2;NFKB1;VEGFA;RPS6KA6;CREB1;RPS6KB1;AKT2;KPNA6;BIRC5;KPNA4;JAK2;IKBKE
Calcium signaling pathway	22/240	0.997358	0.0011489	0.999996	0	0	0.568928	0.00150507	FLT4;ITPR1;PHKA1;PHKB;CALML4;CACNA1C;MCOLN1;VEGFA;PPP3CB;PLCB3;PPP3CC;PLCB4;ASPH;PHKG2;ORAI2;PLCG1;CALM2;FGFR3;MET;CAMK2G;FGFR2;FGFR1
Ovarian steroidogenesis	1951-02-01	0.997498	0.0010879	0.999996	0	0	0.23087	0.000578326	SCARB1;IGF1
Taste transduction	1986-05-01	0.997683	0.00100758	0.999996	0	0	0.348846	0.000809334	PLCB3;GABBR1;PLCB4;CACNA1C;SCN3A
Allograft rejection	1938-01-01	0.997926	0.000901468	0.999996	0	0	0.152931	0.000317439	FAS
Antigen processing and presentation	1978-04-01	0.998371	0.000707932	0.999996	0	0	0.3055	0.000497988	CREB1;HSPA4;NFYB;PSME2
Nicotine addiction	1940-01-01	0.998502	0.000651085	0.999996	0	0	0.145071	0.000217487	GABRE
Bile secretion	1990-05-01	0.998566	0.000623209	0.999996	0	0	0.332351	0.000476921	SCARB1;EPHX1;SLC2A1;HMGCR;SLC9A1
Regulation of lipolysis in adipocytes	1955-02-01	0.998602	0.00060738	0.999996	0	0	0.213396	0.000298443	AKT2;ABHD5
Natural killer cell mediated cytotoxicity	9/131	0.998623	0.000598349	0.999996	0	0	0.416446	0.000573758	PPP3CB;PPP3CC;SYK;SHC1;IFNGR1;FAS;BRAF;FYN;PLCG1
Graft-versus-host disease	1942-01-01	0.998918	0.000470364	0.999996	0	0	0.137978	0.000149438	FAS
Dilated cardiomyopathy	1996-05-01	0.99931	0.000299714	0.999996	0	0	0.310328	0.000214162	TNNT2;TPM1;ITGA6;CACNA1C;IGF1
MicroRNAs in cancer	28/310	0.99938	0.000269518	0.999996	0	0	0.558749	0.000346753	HDAC4;HDAC5;SHC1;HDAC1;TNC;BRCA1;EFNA5;GLS;IKBKB;RASSF1;RPS6KA5;DNMT3B;PLCG1;ABCC1;UBE2I;TPM1;KIF23;NFKB1;VEGFA;ZEB1;APC;ATM;MDM4;FGFR3;CRK;MET;CD44;EZH2
Hematopoietic cell lineage	1999-05-01	0.999524	0.000206962	0.999996	0	0	0.30037	0.00014314	TFRC;IL1R1;IL3RA;ITGA6;CD44
Rheumatoid arthritis	1993-04-01	0.999765	0.000101971	0.999996	0	0	0.253786	5.9588e-05	ATP6V0B;ATP6AP1;ATP6V1H;VEGFA
Retinol metabolism	1968-02-01	0.999793	8.98292e-05	0.999996	0	0	0.171232	3.54175e-05	RDH13;DHRS3
Autoimmune thyroid disease	1953-01-01	0.999817	7.94361e-05	0.999996	0	0	0.10872	1.98858e-05	FAS
Metabolism of xenobiotics by cytochrome P450	1976-02-01	0.999935	2.80503e-05	0.999996	0	0	0.152648	9.85927e-06	EPHX1;MGST2
Steroid hormone biosynthesis	1961-01-01	0.999948	2.25564e-05	0.999996	0	0	0.0941795	4.89149e-06	COMT
Cell adhesion molecules	7/148	0.999978	9.46322e-06	0.999996	0	0	0.279753	6.09579e-06	CD274;CNTNAP1;VCAN;SDC1;ITGA6;NCAM1;MPZL1
Herpes simplex virus 1 infection	30/498	0.999994	2.61295e-06	0.999996	0	0	0.356958	2.14765e-06	SRC;IKBKB;PPP1CB;ZFP57;CASP8;ZFP30;IRAK1;AKT2;JAK2;IKBKE;MAP3K7;APAF1;CHUK;ZFP1;SYK;IFNGR1;TSC2;TSC1;EIF2AK4;TYK2;NFKB1;PML;SRPK1;SRSF3;FAS;TAB2;SRSF5;SRSF6;SRSF7;BIRC2
Olfactory transduction	8/440	0.999994	2.5263e-06	0.999996	0	0	0.102586	5.96743e-07	GRK2;PDE2A;GNB1;ARRB1;ARRB2;CALML4;CALM2;CAMK2G
Neuroactive ligand-receptor interaction	5/341	0.999995	2.35217e-06	0.999996	0	0	0.0828293	4.4861e-07	GHR;GABBR1;GLRB;PARD3;GABRE
Viral protein interaction with cytokine and cytokine receptor	2/100	0.999995	2.28113e-06	0.999996	0	0	0.115101	6.04569e-07	CCL25;IL6ST
Cytokine-cytokine receptor interaction	15/295	0.999995	2.26248e-06	0.999996	0	0	0.30019	1.56385e-06	ACVR1;CCL25;IL15RA;IL1R1;IFNGR1;INHBA;ACVR1B;TGFBR2;GHR;CLCF1;IL3RA;FAS;IL12RB1;IL6ST;BMPR1A
Systemic lupus erythematosus	2/135	0.999996	1.7707e-06	0.999996	0	0	0.084636	3.45078e-07	SSB;ACTN1
