# Supplementary material for: The context-dependent epigenetic and organogenesis programs determine 3D vs. 2D cellular fitness of MYC-driven murine liver cancer cells
Source: eLife. 2025 May 6;14:RP101299. doi: 10.7554/eLife.101299 (PMC12055005; doi:10.7554/eLife.101299)
Supplement: Supplementary file 8. [file elife-101299-supp8.xlsx]

## Sheet: A3SS
Term	Overlap	P-value		Adjusted P-value	Old P-value	Old Adjusted P-value	Odds Ratio	Combined Score	Genes
RNA degradation	1979-11-01	0.000137149	3.86281	0.0149508	0	0	4.30774	38.315	EDC4;HSPA9;PAN2;TTC37;CNOT6L;CNOT2;EXOSC8;CNOT10;ENO1;ENO2;DCPS
RNA transport	18/186	0.000171035	3.76691	0.0149508	0	0	2.86615	24.8599	NDC1;EIF4A1;EIF2B4;NUP205;UBE2I;NUP210;FMR1;SENP2;THOC7;NXF1;XPOT;XPO5;TACC3;EIF3H;NUP88;TARDBP;EIF3A;EIF4G1
HIF-1 signaling pathway	13/109	0.000175205	3.75645	0.0149508	0	0	3.61086	31.2323	STAT3;PIK3R2;ENO1;PDHB;ENO2;HIF1A;LDHA;AKT2;MKNK2;PLCG1;ALDOA;PDK1;MAPK3
Vibrio cholerae infection	1950-08-01	0.000426419	3.37016	0.0272908	0	0	5.05814	39.2516	SEC61A2;ARF1;ATP6V0B;ATP6AP1;GNAS;ATP6V1H;PLCG1;ACTG1
Rap1 signaling pathway	18/210	0.000744919	3.12789	0.0381398	0	0	2.50473	18.0396	VASP;ITGB1;SRC;HGF;VEGFB;PIK3R2;GNAI2;ACTG1;ENAH;AFDN;MAPK11;AKT2;RAPGEF1;GNAS;PLCG1;RALGDS;FGFR3;MAPK3
Thyroid hormone signaling pathway	12/121	0.00161655	2.79141	0.059821	0	0	2.92951	18.8293	KAT2B;MED24;NCOR1;SRC;AKT2;PIK3R2;ITGAV;PLCG1;HIF1A;ACTG1;MED13L;MAPK3
Human cytomegalovirus infection	18/225	0.00163573	2.78629	0.059821	0	0	2.3214	14.8933	ATF6B;ROCK2;SRC;STAT3;PIK3R2;TSC1;GNAI2;CREB3;MAPK11;PPP3CB;CDK4;SP1;AKT2;GNB2;GNAS;ARHGEF1;ITGAV;MAPK3
Platelet activation	12/124	0.00199235	2.70064	0.0637551	0	0	2.8506	17.7263	VASP;ITGB1;MAPK11;ROCK2;SRC;AKT2;GNAS;PIK3R2;ARHGEF1;ACTG1;GNAI2;MAPK3
Dopaminergic synapse	12/132	0.00335498	2.47431	0.0954306	0	0	2.65944	15.1517	CREB3;MAPK11;GSK3A;PPP3CB;ATF6B;AKT2;GNB2;PPP2R2D;GNAS;PPP2R5C;CLOCK;GNAI2
Central carbon metabolism in cancer	1970-08-01	0.00395578	2.40277	0.09999	0	0	3.42292	18.9376	LDHA;AKT2;PIK3R2;PDHB;HIF1A;FGFR3;PDK1;MAPK3
Growth hormone synthesis, secretion and action	11/119	0.00429645	2.36689	0.09999	0	0	2.70663	14.7511	CREB3;MAPK11;ATF6B;AKT2;STAT3;GNAS;PIK3R2;PLCG1;JAK2;GNAI2;MAPK3
PD-L1 expression and PD-1 checkpoint pathway in cancer	1989-09-01	0.00524977	2.27986	0.109998	0	0	2.98568	15.6736	MAPK11;PPP3CB;AKT2;STAT3;PIK3R2;PLCG1;JAK2;HIF1A;MAPK3
VEGF signaling pathway	1959-07-01	0.00558583	2.25291	0.109998	0	0	3.56796	18.5089	MAPK11;PPP3CB;SRC;AKT2;PIK3R2;PLCG1;MAPK3
Spinocerebellar ataxia	12/143	0.0063636	2.1963	0.116363	0	0	2.43473	12.3128	ATXN2L;PSMA6;PSMA3;PSMD4;NFYA;SP1;AKT2;ATXN1L;PIK3R2;PUM1;CIC;PSMA7
Human T-cell leukemia virus 1 infection	16/219	0.00691977	2.15991	0.118097	0	0	2.09869	10.4376	RANBP3;ATF6B;BUB1B;PIK3R2;ANAPC10;RELB;KAT2B;CREB3;PPP3CB;CDK4;AKT2;CHEK2;CDC27;TCF3;ANAPC2;MAPK3
Relaxin signaling pathway	11/129	0.0078266	2.10643	0.125226	0	0	2.47596	12.009	CREB3;MAPK11;ATF6B;SRC;AKT2;GNB2;GNAS;VEGFB;PIK3R2;GNAI2;MAPK3
Proteoglycans in cancer	15/205	0.00863536	2.06372	0.128816	0	0	2.10064	9.982	ITGB1;ROCK2;SRC;HGF;STAT3;PIK3R2;HIF1A;ACTG1;MAPK11;CTTN;AKT2;ARHGEF1;ITGAV;PLCG1;MAPK3
Leukocyte transendothelial migration	10/114	0.00905738	2.043	0.128816	0	0	2.55221	12.006	VASP;MYLPF;ITGB1;AFDN;MAPK11;ROCK2;PIK3R2;PLCG1;ACTG1;GNAI2
Choline metabolism in cancer	1998-09-01	0.00974357	2.01128	0.131282	0	0	2.6825	12.4231	SP1;SLC44A2;AKT2;TSC1;PIK3R2;PLCG1;HIF1A;RALGDS;MAPK3
AGE-RAGE signaling pathway in diabetic complications	9/100	0.0110495	1.95666	0.134698	0	0	2.62327	11.8188	MAPK11;CDK4;AKT2;STAT3;VEGFB;PIK3R2;PLCG1;JAK2;MAPK3
Progesterone-mediated oocyte maturation	9/100	0.0110495	1.95666	0.134698	0	0	2.62327	11.8188	MAPK11;HSP90AB1;AKT2;CDC27;PIK3R2;ANAPC10;ANAPC2;GNAI2;MAPK3
Yersinia infection	11/137	0.0120123	1.92037	0.137943	0	0	2.31779	10.2489	ITGB1;MAPK11;ROCK2;SRC;AKT2;PIK3R2;ARHGEF1;PLCG1;PKN1;ACTG1;MAPK3
AMPK signaling pathway	10/120	0.0127328	1.89508	0.137943	0	0	2.41224	10.526	PFKFB1;CREB3;STK11;PFKFB4;AKT2;AKT1S1;PPP2R2D;TSC1;PIK3R2;PPP2R5C
Renal cell carcinoma	1969-07-01	0.0129321	1.88833	0.137943	0	0	2.99092	13.0047	FLCN;AKT2;HGF;RAPGEF1;PIK3R2;HIF1A;MAPK3
Prolactin signaling pathway	1970-07-01	0.0139295	1.85606	0.142638	0	0	2.9433	12.5789	MAPK11;SRC;AKT2;STAT3;PIK3R2;JAK2;MAPK3
Non-small cell lung cancer	1972-07-01	0.0160872	1.79352	0.152414	0	0	2.85244	11.7798	CDK4;AKT2;HGF;STAT3;PIK3R2;PLCG1;MAPK3
Th17 cell differentiation	9/107	0.016665	1.7782	0.152414	0	0	2.43501	9.97001	MAPK11;PPP3CB;HSP90AB1;STAT3;STAT6;PLCG1;JAK2;HIF1A;MAPK3
Axon guidance	13/182	0.0166703	1.77806	0.152414	0	0	2.04333	8.36565	ITGB1;ROCK2;SRC;RYK;SEMA4C;PIK3R2;GNAI2;ENAH;PPP3CB;BOC;PLCG1;NEO1;MAPK3
Shigellosis	16/246	0.0193095	1.71423	0.170456	0	0	1.8497	7.30105	ITGB1;ARF1;GSK3A;ROCK2;SRC;PIK3R2;U2AF1;ACTG1;MYLPF;MAPK11;CTTN;AKT2;AKT1S1;PLCG1;ARHGEF2;MAPK3
Notch signaling pathway	1959-06-01	0.0204994	1.68826	0.174928	0	0	2.99626	11.6475	LFNG;TLE4;JAG2;KAT2B;ATXN1L;RFNG
Estrogen signaling pathway	10/137	0.0291847	1.53484	0.229295	0	0	2.08749	7.37741	CREB3;HSP90AB1;ATF6B;SP1;SRC;AKT2;GNAS;PIK3R2;GNAI2;MAPK3
Sphingolipid signaling pathway	9/119	0.0307397	1.5123	0.229295	0	0	2.16801	7.54945	MAPK11;CERS5;ROCK2;AKT2;PPP2R2D;PIK3R2;PPP2R5C;GNAI2;MAPK3
Cortisol synthesis and secretion	1965-06-01	0.0313357	1.50396	0.229295	0	0	2.69071	9.31793	SCARB1;CREB3;ATF6B;SP1;GNAS;LDLR
Fructose and mannose metabolism	1933-04-01	0.0314006	1.50306	0.229295	0	0	3.64513	12.6155	PFKFB1;PFKFB4;GMPPA;ALDOA
Fluid shear stress and atherosclerosis	10/139	0.0318103	1.49743	0.229295	0	0	2.05491	7.08525	PIAS4;MAPK11;HSP90AB1;MAPK7;SRC;AKT2;PIK3R2;ITGAV;ARHGEF2;ACTG1
Cocaine addiction	1949-05-01	0.0328134	1.48395	0.229295	0	0	3.00488	10.2674	CREB3;ATF6B;DLG4;GNAS;GNAI2
Longevity regulating pathway	8/102	0.033539	1.47445	0.229295	0	0	2.25391	7.65213	CREB3;STK11;ATF6B;EHMT2;AKT2;AKT1S1;TSC1;PIK3R2
Focal adhesion	13/201	0.0340359	1.46806	0.229295	0	0	1.835	6.20291	VASP;ITGB1;ROCK2;SRC;HGF;VEGFB;PIK3R2;ACTG1;MYLPF;AKT2;RAPGEF1;ITGAV;MAPK3
Glycolysis / Gluconeogenesis	1967-06-01	0.035643	1.44803	0.23161	0	0	2.60222	8.67633	ALDH3A2;LDHA;ENO1;PDHB;ENO2;ALDOA
Hepatitis B	11/162	0.0361891	1.44142	0.23161	0	0	1.93152	6.41072	CREB3;MAPK11;ATP6AP1;ATF6B;SRC;AKT2;STAT3;PIK3R2;STAT6;JAK2;MAPK3
Signaling pathways regulating pluripotency of stem cells	10/143	0.0375511	1.42538	0.234466	0	0	1.99269	6.54011	MAPK11;PCGF6;AKT2;STAT3;PIK3R2;TCF3;JAK2;ISL1;FGFR3;MAPK3
Cell cycle	9/124	0.0385198	1.41432	0.234787	0	0	2.07321	6.75158	CDK4;CHEK2;ORC3;CDC27;BUB1B;CDC7;E2F4;ANAPC10;ANAPC2
Parathyroid hormone synthesis, secretion and action	8/106	0.0407237	1.39015	0.242448	0	0	2.16146	6.91872	NR4A2;CREB3;ATF6B;SP1;GNAS;ARHGEF1;GNAI2;MAPK3
Glucagon signaling pathway	8/107	0.0426678	1.3699	0.243409	0	0	2.13952	6.7487	PFKFB1;CREB3;LDHA;PPP3CB;PPP4C;AKT2;GNAS;PDHB
Epithelial cell signaling in Helicobacter pylori infection	1970-06-01	0.0427867	1.36869	0.243409	0	0	2.47986	7.81533	MAPK11;ATP6V0B;ATP6AP1;SRC;ATP6V1H;PLCG1
Tight junction	11/169	0.0467478	1.33024	0.252702	0	0	1.84527	5.65205	VASP;ITGB1;AFDN;STK11;CTTN;CDK4;ROCK2;SRC;PPP2R2D;ARHGEF2;ACTG1
Ras signaling pathway	14/232	0.0467889	1.32986	0.252702	0	0	1.70389	5.2175	BRAP;HGF;VEGFB;PIK3R2;RASAL2;AFDN;SYNGAP1;AKT2;GNB2;PLCG1;RALGDS;RGL2;FGFR3;MAPK3
Adrenergic signaling in cardiomyocytes	10/150	0.0492492	1.3076	0.252702	0	0	1.89236	5.69764	CREB3;MAPK11;ATF6B;AKT2;TNNT2;PPP2R2D;GNAS;PPP2R5C;GNAI2;MAPK3
Inositol phosphate metabolism	1973-06-01	0.050769	1.2944	0.252702	0	0	2.36845	7.05908	INPP4A;MTMR14;SACM1L;INPPL1;PLCG1;PIK3C2A
p53 signaling pathway	1973-06-01	0.050769	1.2944	0.252702	0	0	2.36845	7.05908	PIDD1;AIFM2;CDK4;CHEK2;CCNG2;CCNG1
Th1 and Th2 cell differentiation	1992-07-01	0.0517051	1.28647	0.252702	0	0	2.179	6.45464	JAG2;MAPK11;PPP3CB;STAT6;PLCG1;JAK2;MAPK3
Kaposi sarcoma-associated herpesvirus infection	12/193	0.0520025	1.28398	0.252702	0	0	1.75755	5.19613	MAPK11;PPP3CB;CDK4;SRC;AKT2;GNB2;STAT3;PIK3R2;PLCG1;JAK2;HIF1A;MAPK3
Lipid and atherosclerosis	13/215	0.0532784	1.27345	0.252702	0	0	1.70656	5.00403	HSP90AB1;ROCK2;SRC;STAT3;PIK3R2;MAPK11;PPP3CB;AKT2;ARHGEF1;PLCG1;JAK2;LDLR;MAPK3
Toxoplasmosis	8/112	0.0533043	1.27324	0.252702	0	0	2.03612	5.96938	ITGB1;MAPK11;AKT2;STAT3;JAK2;LDLR;GNAI2;MAPK3
mTOR signaling pathway	10/154	0.0569227	1.24471	0.264949	0	0	1.83941	5.27187	FLCN;STK11;AKT2;AKT1S1;ATP6V1H;TSC1;PIK3R2;DEPDC5;FNIP1;MAPK3
Cushing syndrome	10/155	0.0589568	1.22947	0.267695	0	0	1.82663	5.1711	SCARB1;KMT2D;CREB3;ATF6B;CDK4;SP1;GNAS;LDLR;GNAI2;MAPK3
Pancreatic cancer	1976-06-01	0.059604	1.22472	0.267695	0	0	2.26659	6.39185	CDK4;AKT2;STAT3;PIK3R2;RALGDS;MAPK3
Cellular senescence	10/156	0.0610377	1.2144	0.267732	0	0	1.81402	5.07249	MAPK11;PPP3CB;CDK4;AKT2;CHEK2;TSC1;PIK3R2;MYBL2;E2F4;MAPK3
Bladder cancer	1941-04-01	0.0619918	1.20767	0.267732	0	0	2.85581	7.94129	SRC;CDK4;FGFR3;MAPK3
PI3K-Akt signaling pathway	19/354	0.0627498	1.20239	0.267732	0	0	1.50605	4.16964	ITGB1;HSP90AB1;ATF6B;HGF;VEGFB;PIK3R2;TSC1;PPP2R5C;CREB3;STK11;CDK4;AKT2;GNB2;PPP2R2D;ITGAV;PKN1;JAK2;FGFR3;MAPK3
Phosphatidylinositol signaling system	1997-07-01	0.0651111	1.18634	0.267937	0	0	2.05741	5.62014	INPP4A;SACM1L;MTMR14;INPPL1;PIK3R2;PLCG1;PIK3C2A
Ribosome	10/158	0.0653408	1.18482	0.267937	0	0	1.78932	4.88152	RPS4X;RPS14;RPL27A;MRPS10;RPLP2;RPS2;RPL39;RPL28;RPS24;MRPS18C
Tuberculosis	11/180	0.0672704	1.17218	0.267937	0	0	1.72418	4.65361	HSPA9;MAPK11;PPP3CB;ATP6V0B;ATP6AP1;NFYA;SRC;AKT2;ATP6V1H;JAK2;MAPK3
mRNA surveillance pathway	1998-07-01	0.0680221	1.16735	0.267937	0	0	2.03469	5.4691	CPSF4;HBS1L;NXF1;FIP1L1;PPP2R2D;PPP2R5C;TARDBP
Glycosylphosphatidylinositol (GPI)-anchor biosynthesis	2023-03-26	0.0680308	1.16729	0.267937	0	0	3.44337	9.25507	PIGS;PIGB;PIGU
Viral carcinogenesis	12/203	0.0704265	1.15226	0.270641	0	0	1.66466	4.41665	KAT2B;CREB3;HDAC5;HDAC10;ATF6B;CDK4;SRC;STAT3;PIK3R2;GTF2H1;CHD4;MAPK3
Neurotrophin signaling pathway	8/119	0.0708317	1.14977	0.270641	0	0	1.90702	5.04874	MAPK11;MAPK7;PRDM4;AKT2;RAPGEF1;PIK3R2;PLCG1;MAPK3
Chagas disease	7/102	0.0804347	1.09456	0.301322	0	0	1.94862	4.91112	MAPK11;AKT2;PPP2R2D;GNAS;PIK3R2;GNAI2;MAPK3
Basal transcription factors	1945-04-01	0.0815495	1.08858	0.301322	0	0	2.57666	6.4585	GTF2H1;GTF2IRD1;GTF2I;TAF1
Coronavirus disease	13/232	0.0852264	1.06943	0.301322	0	0	1.57269	3.87266	STAT3;PIK3R2;RPS4X;RPS14;MAPK11;RPL27A;RPLP2;PLCG1;RPS2;RPL39;RPL28;RPS24;MAPK3
Proteasome	1946-04-01	0.0868619	1.06117	0.301322	0	0	2.51518	6.14567	PSMA6;PSMA3;PSMD4;PSMA7
cGMP-PKG signaling pathway	10/167	0.087069	1.06014	0.301322	0	0	1.68596	4.11551	VASP;CREB3;PPP3CB;ATF6B;ROCK2;AKT2;GTF2IRD1;GTF2I;GNAI2;MAPK3
C-type lectin receptor signaling pathway	7/104	0.0871008	1.05998	0.301322	0	0	1.90824	4.65742	MAPK11;PPP3CB;SRC;AKT2;PIK3R2;RELB;MAPK3
T cell receptor signaling pathway	7/104	0.0871008	1.05998	0.301322	0	0	1.90824	4.65742	MAPK11;PPP3CB;CDK4;AKT2;PIK3R2;PLCG1;MAPK3
Other types of O-glycan biosynthesis	1947-04-01	0.0923376	1.03462	0.311032	0	0	2.45656	5.85226	LFNG;B3GLCT;RFNG;OGT
Pyruvate metabolism	1947-04-01	0.0923376	1.03462	0.311032	0	0	2.45656	5.85226	ALDH3A2;LDHA;PDHB;ME2
Chemokine signaling pathway	11/192	0.0954469	1.02024	0.31733	0	0	1.60885	3.77949	GSK3A;ROCK2;SRC;AKT2;GNB2;STAT3;PIK3R2;PLCG1;JAK2;GNAI2;MAPK3
Insulin resistance	7/108	0.101342	0.994209	0.32963	0	0	1.83228	4.19456	CREB3;AKT2;NR1H2;STAT3;MLX;PIK3R2;OGT
Human papillomavirus infection	17/331	0.101722	0.992587	0.32963	0	0	1.43521	3.28018	ITGB1;ATP6V0B;ATP6AP1;PIK3R2;TSC1;CHD4;RFNG;PPP2R5C;LFNG;CREB3;CDK4;AKT2;PPP2R2D;GNAS;ATP6V1H;ITGAV;MAPK3
Fc epsilon RI signaling pathway	1968-05-01	0.103211	0.986274	0.330275	0	0	2.09657	4.76127	MAPK11;AKT2;PIK3R2;PLCG1;MAPK3
Regulation of actin cytoskeleton	12/218	0.105167	0.978121	0.33238	0	0	1.54223	3.47343	MYLPF;ENAH;ITGB1;ABI2;ROCK2;SRC;PIK3R2;ARHGEF1;ITGAV;FGFR3;ACTG1;MAPK3
Adipocytokine signaling pathway	1969-05-01	0.108125	0.966075	0.336198	0	0	2.0637	4.59064	STK11;AKT2;STAT3;ACSL4;JAK2
Pathogenic Escherichia coli infection	11/197	0.109002	0.962567	0.336198	0	0	1.56519	3.46908	ITGB1;MAPK11;ARF1;CTTN;ROCK2;SRC;NCL;ARHGEF1;ARHGEF2;ACTG1;MAPK3
TNF signaling pathway	7/112	0.116772	0.932662	0.355876	0	0	1.76211	3.7842	CREB3;MAPK11;ATF6B;AKT2;PIK3R2;PGAM5;MAPK3
Cholinergic synapse	7/113	0.12081	0.917897	0.363852	0	0	1.7454	3.68896	CREB3;AKT2;GNB2;PIK3R2;JAK2;GNAI2;MAPK3
Melanoma	1972-05-01	0.123531	0.908223	0.367721	0	0	1.97099	4.12186	CDK4;AKT2;HGF;PIK3R2;MAPK3
Autophagy	8/137	0.130212	0.885347	0.383154	0	0	1.63938	3.34203	STK11;AKT2;MTMR14;AKT1S1;TSC1;PIK3R2;HIF1A;MAPK3
Glioma	1975-05-01	0.13989	0.854212	0.404026	0	0	1.88623	3.71001	CDK4;AKT2;PIK3R2;PLCG1;MAPK3
Regulation of lipolysis in adipocytes	1955-04-01	0.141579	0.849002	0.404026	0	0	2.07035	4.04733	AKT2;GNAS;PIK3R2;GNAI2
Ubiquitin mediated proteolysis	8/140	0.14204	0.847588	0.404026	0	0	1.60188	3.12629	PIAS4;UBE2I;SMURF1;CDC27;UBR5;UBE2E2;ANAPC10;ANAPC2
Fc gamma R-mediated phagocytosis	1997-06-01	0.144915	0.838888	0.407672	0	0	1.74162	3.36413	VASP;AKT2;INPPL1;PIK3R2;PLCG1;MAPK3
Aldosterone synthesis and secretion	1998-06-01	0.149929	0.824113	0.412036	0	0	1.7226	3.26879	NR4A2;SCARB1;CREB3;ATF6B;GNAS;LDLR
Apoptosis	8/142	0.150212	0.823296	0.412036	0	0	1.5778	2.99105	PIDD1;DFFB;AKT2;HTRA2;PIK3R2;LMNB2;ACTG1;MAPK3
Bacterial invasion of epithelial cells	1977-05-01	0.151295	0.820177	0.412036	0	0	1.83364	3.46288	ITGB1;CTTN;SRC;PIK3R2;ACTG1
B cell receptor signaling pathway	1981-05-01	0.175207	0.75645	0.469422	0	0	1.73677	3.02509	PPP3CB;AKT2;INPPL1;PIK3R2;MAPK3
Phospholipase D signaling pathway	8/148	0.176033	0.754405	0.469422	0	0	1.50971	2.62249	ARF1;AKT2;GNAS;TSC1;PIK3R2;PLCG1;RALGDS;MAPK3
Pantothenate and CoA biosynthesis	2023-02-21	0.17831	0.748824	0.470592	0	0	2.77563	4.78583	ALDH3A2;PPCDC
Spliceosome	8/150	0.185053	0.732704	0.483404	0	0	1.48829	2.51091	SF3A3;XAB2;PRPF40B;U2AF1;HNRNPC;SRSF6;SRSF10;BCAS2
Homologous recombination	1941-03-01	0.188766	0.724075	0.487732	0	0	2.08252	3.47207	TOP3B;POLD2;RAD54B
Phagosome	8/152	0.194267	0.711601	0.487732	0	0	1.46746	2.40447	ITGB1;SEC61A2;SCARB1;ATP6V0B;ATP6AP1;ATP6V1H;ITGAV;ACTG1
Oocyte meiosis	7/129	0.194421	0.711257	0.487732	0	0	1.51523	2.48154	MAPK11;PPP3CB;CDC27;PPP2R5C;ANAPC10;ANAPC2;MAPK3
Lysine degradation	1963-04-01	0.198907	0.701351	0.487732	0	0	1.78888	2.8889	ALDH3A2;KMT2D;KMT5C;EHMT2
ErbB signaling pathway	1985-05-01	0.200443	0.69801	0.487732	0	0	1.64959	2.65126	SRC;AKT2;PIK3R2;PLCG1;MAPK3
Salmonella infection	12/249	0.203387	0.691678	0.487732	0	0	1.33833	2.13148	MYLPF;MAPK11;ARF1;HSP90AB1;ROCK2;AKT2;PKN1;KLC1;PIK3C2A;ARL8A;ACTG1;MAPK3
Oxytocin signaling pathway	8/154	0.203667	0.69108	0.487732	0	0	1.44721	2.3029	PPP3CB;MAPK7;ROCK2;SRC;GNAS;ACTG1;GNAI2;MAPK3
FoxO signaling pathway	7/131	0.204684	0.688916	0.487732	0	0	1.49063	2.36457	MAPK11;STK11;AKT2;CCNG2;STAT3;PIK3R2;MAPK3
GnRH secretion	1964-04-01	0.20652	0.685039	0.487732	0	0	1.75897	2.77454	AKT2;PIK3R2;KCNN4;MAPK3
Insulin secretion	1986-05-01	0.206937	0.684162	0.487732	0	0	1.62914	2.56645	CREB3;ATF6B;GNAS;KCNN4;VAMP2
Fatty acid degradation	1943-03-01	0.207667	0.682632	0.487732	0	0	1.97819	3.10935	ALDH3A2;ECI2;ACSL4
Vasopressin-regulated water reabsorption	1944-03-01	0.217272	0.662996	0.498694	0	0	1.92984	2.9461	CREB3;GNAS;VAMP2
Hepatitis C	8/157	0.218096	0.661351	0.498694	0	0	1.41785	2.15913	SCARB1;CDK4;AKT2;STAT3;PPP2R2D;PIK3R2;LDLR;MAPK3
Vitamin digestion and absorption	2023-02-24	0.218705	0.660142	0.498694	0	0	2.39676	3.64316	SCARB1;SLC19A1
Gap junction	1988-05-01	0.220127	0.657327	0.498694	0	0	1.58972	2.40612	MAPK7;SRC;GNAS;GNAI2;MAPK3
Acute myeloid leukemia	1967-04-01	0.229835	0.638584	0.51465	0	0	1.67495	2.46284	AKT2;STAT3;PIK3R2;MAPK3
Pathways in cancer	23/531	0.23119	0.63603	0.51465	0	0	1.19798	1.75446	JAG2;ITGB1;HSP90AB1;ROCK2;HGF;STAT3;VEGFB;PIK3R2;HIF1A;GNAI2;CDK4;SP1;AKT2;GNB2;GNAS;STAT6;ITGAV;ARHGEF1;PLCG1;JAK2;RALGDS;FGFR3;MAPK3
Insulin signaling pathway	7/137	0.236635	0.625921	0.519384	0	0	1.42139	2.04856	AKT2;MKNK2;INPPL1;RAPGEF1;TSC1;PIK3R2;MAPK3
Mitophagy	1968-04-01	0.237749	0.623882	0.519384	0	0	1.6487	2.36842	SRC;SP1;PGAM5;HIF1A
Glutamatergic synapse	6/114	0.239404	0.620869	0.519384	0	0	1.46618	2.09605	PPP3CB;DLG4;GNB2;GNAS;GNAI2;MAPK3
Amphetamine addiction	1969-04-01	0.245726	0.609549	0.523059	0	0	1.62325	2.27829	CREB3;PPP3CB;ATF6B;GNAS
Nucleotide excision repair	1947-03-01	0.246587	0.60803	0.523059	0	0	1.79798	2.51725	ERCC1;POLD2;GTF2H1
Small cell lung cancer	1992-05-01	0.247227	0.606904	0.523059	0	0	1.51631	2.11896	ITGB1;CDK4;AKT2;ITGAV;PIK3R2
GnRH signaling pathway	1993-05-01	0.254135	0.594936	0.527821	0	0	1.499	2.05347	MAPK11;MAPK7;SRC;GNAS;MAPK3
Neutrophil extracellular trap formation	9/189	0.256871	0.590286	0.527821	0	0	1.32006	1.7942	HDAC5;MAPK11;HDAC10;SRC;AKT2;PIK3R2;PLCG1;ACTG1;MAPK3
Chemical carcinogenesis	11/239	0.260889	0.583544	0.527821	0	0	1.27406	1.7119	CREB3;HSP90AB1;ATF6B;SRC;AKT2;STAT3;GNAS;PIK3R2;JAK2;GNAI2;MAPK3
TGF-beta signaling pathway	1994-05-01	0.261089	0.583212	0.527821	0	0	1.48208	1.99028	SMURF1;SP1;E2F4;NEO1;MAPK3
Amyotrophic lateral sclerosis	16/364	0.261178	0.583063	0.527821	0	0	1.21492	1.6311	NDC1;NUP205;NUP210;KLC1;PSMA7;ACTG1;ATXN2L;PSMA6;NXF1;MAPK11;PPP3CB;PSMA3;PSMD4;HNRNPA2B1;NUP88;TARDBP
Adherens junction	1971-04-01	0.261849	0.58195	0.527821	0	0	1.57463	2.10998	AFDN;SRC;ACTG1;MAPK3
Hepatocellular carcinoma	8/168	0.273937	0.562349	0.545987	0	0	1.31961	1.70871	CDK4;AKT2;HGF;PIK3R2;PLCG1;BRD7;ACTG1;MAPK3
Dilated cardiomyopathy	1996-05-01	0.275126	0.560468	0.545987	0	0	1.44936	1.87043	ITGB1;TNNT2;GNAS;ITGAV;ACTG1
Prostate cancer	1997-05-01	0.282203	0.549439	0.555722	0	0	1.43353	1.8136	CREB3;HSP90AB1;AKT2;PIK3R2;MAPK3
Ovarian steroidogenesis	1951-03-01	0.286501	0.542874	0.55988	0	0	1.64781	2.05978	SCARB1;GNAS;LDLR
Inflammatory mediator regulation of TRP channels	1998-05-01	0.289314	0.53863	0.561094	0	0	1.41804	1.75871	MAPK11;SRC;GNAS;PIK3R2;PLCG1
Influenza A	8/172	0.295174	0.529923	0.56604	0	0	1.28716	1.57058	CPSF4;NXF1;CDK4;AKT2;PIK3R2;JAK2;ACTG1;MAPK3
Prion disease	12/273	0.299289	0.52391	0.56604	0	0	1.21373	1.46418	PSMA6;CREB3;MAPK11;PPP3CB;PSMA3;PSMD4;ATF6B;PIK3R2;NCAM1;KLC1;PSMA7;MAPK3
Pentose phosphate pathway	1930-02-01	0.300891	0.52159	0.56604	0	0	1.88258	2.26099	PGLS;ALDOA
Chronic myeloid leukemia	1976-04-01	0.30292	0.518673	0.56604	0	0	1.4649	1.74951	CDK4;AKT2;PIK3R2;MAPK3
Pertussis	1976-04-01	0.30292	0.518673	0.56604	0	0	1.4649	1.74951	ITGB1;MAPK11;GNAI2;MAPK3
Leishmaniasis	1977-04-01	0.311228	0.506921	0.57735	0	0	1.44475	1.68636	ITGB1;MAPK11;JAK2;MAPK3
Fanconi anemia pathway	1954-03-01	0.316761	0.499269	0.583144	0	0	1.55063	1.78262	TOP3B;CENPX;ERCC1
Synaptic vesicle cycle	1978-04-01	0.319557	0.495452	0.583144	0	0	1.42516	1.62585	ATP6V0B;UNC13A;ATP6V1H;VAMP2
Osteoclast differentiation	6/127	0.321185	0.493245	0.583144	0	0	1.30777	1.48528	MAPK11;PPP3CB;AKT2;PIK3R2;RELB;MAPK3
NF-kappa B signaling pathway	5/104	0.332548	0.478146	0.599523	0	0	1.33168	1.46614	PIAS4;PIDD1;UBE2I;PLCG1;RELB
Ubiquinone and other terpenoid-quinone biosynthesis	2023-01-11	0.33652	0.472989	0.602441	0	0	2.63447	2.8692	COQ2
Peroxisome	1982-04-01	0.352998	0.452228	0.627552	0	0	1.35179	1.40761	SCP2;ECI2;ACSL4;PEX14
Endometrial cancer	1958-03-01	0.357148	0.447151	0.630552	0	0	1.43756	1.48012	AKT2;PIK3R2;MAPK3
Ribosome biogenesis in eukaryotes	5/108	0.361699	0.441652	0.633919	0	0	1.2797	1.30138	NXF1;NOP58;MDN1;WDR43;GNL3
Necroptosis	7/159	0.364008	0.438889	0.633919	0	0	1.21426	1.22711	HSP90AB1;USP21;STAT3;CHMP3;PGAM5;STAT6;JAK2
Alcoholism	8/186	0.371923	0.429547	0.643327	0	0	1.18505	1.1721	CREB3;HDAC5;HDAC10;ATF6B;GNB2;GNAS;GNAI2;MAPK3
Long-term depression	1960-03-01	0.377239	0.423384	0.648142	0	0	1.38698	1.35213	GNAS;GNAI2;MAPK3
JAK-STAT signaling pathway	7/162	0.38202	0.417914	0.651981	0	0	1.19058	1.14567	PIAS4;AKT2;STAT3;PIK3R2;STAT6;STAM;JAK2
Colorectal cancer	1986-04-01	0.386446	0.412911	0.655167	0	0	1.28558	1.22228	AKT2;PIK3R2;RALGDS;MAPK3
Aldosterone-regulated sodium reabsorption	1937-02-01	0.394655	0.403782	0.664682	0	0	1.50552	1.39975	PIK3R2;MAPK3
Hypertrophic cardiomyopathy	1990-04-01	0.419664	0.377098	0.702184	0	0	1.22553	1.06413	ITGB1;TNNT2;ITGAV;ACTG1
Breast cancer	6/147	0.451885	0.344972	0.74726	0	0	1.12109	0.890518	JAG2;CDK4;SP1;AKT2;PIK3R2;MAPK3
IL-17 signaling pathway	1994-04-01	0.452443	0.344437	0.74726	0	0	1.17082	0.928569	MAPK11;HSP90AB1;MAPK7;MAPK3
Renin secretion	1969-03-01	0.4654	0.332174	0.763733	0	0	1.19728	0.91575	PPP3CB;GNAS;GNAI2
Primary bile acid biosynthesis	2023-01-17	0.469603	0.328269	0.765722	0	0	1.64603	1.24418	SCP2
Circadian entrainment	1997-04-01	0.476625	0.321823	0.772254	0	0	1.13287	0.839487	GNB2;GNAS;GNAI2;MAPK3
Fatty acid biosynthesis	2023-01-18	0.489032	0.310663	0.787372	0	0	1.54913	1.10813	ACSL4
Glycosphingolipid biosynthesis	1945-02-01	0.494165	0.306128	0.790664	0	0	1.22491	0.863423	B4GALNT1;ST6GALNAC6
Lysosome	5/128	0.505336	0.29642	0.795419	0	0	1.0705	0.730649	GGA1;ATP6V0B;ATP6AP1;ATP6V1H;LGMN
Type II diabetes mellitus	1946-02-01	0.505866	0.295964	0.795419	0	0	1.19701	0.815743	PIK3R2;MAPK3
Melanogenesis	4/101	0.508205	0.293961	0.795419	0	0	1.08593	0.735034	CREB3;GNAS;GNAI2;MAPK3
MAPK signaling pathway	11/294	0.513608	0.289368	0.795419	0	0	1.02349	0.681942	MAPK11;PPP3CB;MAPK7;AKT2;HGF;MKNK2;VEGFB;FGFR3;RELB;MAP4K4;MAPK3
Human immunodeficiency virus 1 infection	8/212	0.515545	0.287733	0.795419	0	0	1.03261	0.684133	MAPK11;PPP3CB;AKT2;GNB2;PIK3R2;PLCG1;GNAI2;MAPK3
Carbohydrate digestion and absorption	1947-02-01	0.51739	0.286182	0.795419	0	0	1.17035	0.771213	AKT2;PIK3R2
Thyroid hormone synthesis	1975-03-01	0.521025	0.283141	0.795419	0	0	1.09717	0.715304	CREB3;ATF6B;GNAS
Protein digestion and absorption	4/103	0.52367	0.280942	0.795419	0	0	1.06388	0.688217	COL27A1;COL5A1;COL12A1;KCNN4
Steroid biosynthesis	2023-01-20	0.525784	0.279193	0.795419	0	0	1.38592	0.890958	FDFT1
Gastric acid secretion	1976-03-01	0.529988	0.275734	0.795419	0	0	1.08208	0.687012	GNAS;ACTG1;GNAI2
Toll-like receptor signaling pathway	4/104	0.531315	0.274648	0.795419	0	0	1.05319	0.666035	MAPK11;AKT2;PIK3R2;MAPK3
cAMP signaling pathway	8/216	0.536852	0.270145	0.796739	0	0	1.01254	0.629831	AFDN;CREB3;ROCK2;AKT2;GNAS;PIK3R2;GNAI2;MAPK3
Arrhythmogenic right ventricular cardiomyopathy	1977-03-01	0.538857	0.268526	0.796739	0	0	1.0674	0.659979	ITGB1;ITGAV;ACTG1
Antigen processing and presentation	1978-03-01	0.547629	0.261514	0.796739	0	0	1.05311	0.63414	HSP90AB1;NFYA;LGMN
Arginine and proline metabolism	1950-02-01	0.55087	0.258951	0.796739	0	0	1.09703	0.654112	ALDH3A2;PYCR2
Cholesterol metabolism	1950-02-01	0.55087	0.258951	0.796739	0	0	1.09703	0.654112	SCARB1;LDLR
Cysteine and methionine metabolism	1950-02-01	0.55087	0.258951	0.796739	0	0	1.09703	0.654112	MTAP;LDHA
Histidine metabolism	2023-01-22	0.559895	0.251893	0.804846	0	0	1.25379	0.727208	ALDH3A2
Parkinson disease	9/249	0.562791	0.249653	0.804846	0	0	0.986929	0.567334	PSMA6;PSMA3;PSMD4;GNAS;HTRA2;PLCG1;KLC1;PSMA7;GNAI2
Apelin signaling pathway	5/137	0.565907	0.247255	0.804846	0	0	0.997041	0.567641	HDAC5;AKT2;GNB2;GNAI2;MAPK3
Wnt signaling pathway	6/166	0.57027	0.243919	0.805355	0	0	0.986983	0.554334	TLE4;PPP3CB;ROCK2;RYK;NOTUM;SENP2
Mismatch repair	2023-01-23	0.576021	0.239562	0.805355	0	0	1.19674	0.660137	POLD2
Protein export	2023-01-23	0.576021	0.239562	0.805355	0	0	1.19674	0.660137	SEC61A2
Measles	5/139	0.578849	0.237435	0.805355	0	0	0.982057	0.536904	CDK4;AKT2;STAT3;EIF3H;PIK3R2
Serotonergic synapse	4/113	0.597196	0.223883	0.824889	0	0	0.965773	0.497866	GNB2;GNAS;GNAI2;MAPK3
Protein processing in endoplasmic reticulum	6/171	0.599333	0.222332	0.824889	0	0	0.956824	0.489834	SEC61A2;DNAJB2;HSP90AB1;ATF6B;ERP29;DERL2
Epstein-Barr virus infection	7/202	0.611702	0.21346	0.830033	0	0	0.944375	0.46417	MAPK11;PSMD4;CDK4;AKT2;STAT3;PIK3R2;RELB
Hedgehog signaling pathway	1956-02-01	0.612798	0.212683	0.830033	0	0	0.974835	0.477396	SMURF1;BOC
Pyrimidine metabolism	1956-02-01	0.612798	0.212683	0.830033	0	0	0.974835	0.477396	NME6;NT5C2
Thermogenesis	8/232	0.617995	0.209015	0.832667	0	0	0.939424	0.452121	CREB3;MAPK11;COX16;AKT1S1;GNAS;ACSL4;TSC1;ACTG1
Legionellosis	1957-02-01	0.622461	0.205888	0.834293	0	0	0.957061	0.453718	HBS1L;ARF1
Biosynthesis of unsaturated fatty acids	2023-01-27	0.634834	0.19734	0.84533	0	0	1.01242	0.460034	SCP2
GABAergic synapse	1989-03-01	0.6373	0.195656	0.84533	0	0	0.917887	0.413522	SRC;GNB2;GNAI2
Bile secretion	1990-03-01	0.644805	0.190572	0.846287	0	0	0.907289	0.398126	SCARB1;GNAS;LDLR
Mineral absorption	1960-02-01	0.650328	0.186868	0.846287	0	0	0.907416	0.390442	S100G;CLCN2
Viral myocarditis	1960-02-01	0.650328	0.186868	0.846287	0	0	0.907416	0.390442	ACTG1;EIF4G1
Morphine addiction	1991-03-01	0.652199	0.18562	0.846287	0	0	0.896932	0.383354	GNB2;GNAS;GNAI2
Glycerolipid metabolism	1961-02-01	0.659246	0.180952	0.846287	0	0	0.89199	0.371655	ALDH3A2;PLPP5
Rheumatoid arthritis	1993-03-01	0.666655	0.176099	0.846287	0	0	0.876909	0.355571	ATP6V0B;ATP6AP1;ATP6V1H
Salivary secretion	1993-03-01	0.666655	0.176099	0.846287	0	0	0.876909	0.355571	GNAS;KCNN4;VAMP2
Ascorbate and aldarate metabolism	2023-01-30	0.673532	0.171642	0.846287	0	0	0.907543	0.358679	ALDH3A2
Citrate cycle (TCA cycle)	2023-01-30	0.673532	0.171642	0.846287	0	0	0.907543	0.358679	PDHB
beta-Alanine metabolism	2023-01-30	0.673532	0.171642	0.846287	0	0	0.907543	0.358679	ALDH3A2
Non-alcoholic fatty liver disease	5/155	0.674385	0.171092	0.846287	0	0	0.87657	0.345328	MAPK11;GSK3A;AKT2;MLX;PIK3R2
Circadian rhythm	2023-01-31	0.685498	0.163994	0.850448	0	0	0.877246	0.331256	CLOCK
RNA polymerase	2023-01-31	0.685498	0.163994	0.850448	0	0	0.877246	0.331256	POLR1C
Inflammatory bowel disease	1965-02-01	0.693102	0.159203	0.850448	0	0	0.835182	0.30616	STAT3;STAT6
Glycerophospholipid metabolism	1998-03-01	0.700859	0.154369	0.850448	0	0	0.830539	0.295214	PLPP5;PNPLA6;TAZ
MicroRNAs in cancer	10/310	0.702131	0.153582	0.850448	0	0	0.875716	0.309684	HDAC5;UBE2I;MAPK7;STAT3;CCNG1;PIK3R2;PLCG1;FGFR3;FOXP1;MAPK3
Endocytosis	8/252	0.707765	0.150111	0.850448	0	0	0.861516	0.297778	ARF1;DAB2;SMURF1;SRC;CHMP3;STAM;LDLR;FGFR3
Base excision repair	1933-01-01	0.708133	0.149885	0.850448	0	0	0.822332	0.283806	POLD2
SNARE interactions in vesicular transport	1933-01-01	0.708133	0.149885	0.850448	0	0	0.822332	0.283806	VAMP2
Long-term potentiation	1967-02-01	0.708962	0.149377	0.850448	0	0	0.809399	0.278396	PPP3CB;MAPK3
Natural killer cell mediated cytotoxicity	4/131	0.710922	0.148178	0.850448	0	0	0.828113	0.282546	PPP3CB;PIK3R2;PLCG1;MAPK3
Propanoate metabolism	1934-01-01	0.718833	0.143372	0.855682	0	0	0.797372	0.263233	LDHA
Vascular smooth muscle contraction	4/133	0.721981	0.141474	0.855682	0	0	0.815189	0.265553	ROCK2;GNAS;ARHGEF1;MAPK3
Nicotinate and nicotinamide metabolism	1935-01-01	0.729141	0.137188	0.860185	0	0	0.773879	0.244459	NT5C2
DNA replication	1936-01-01	0.739072	0.131313	0.867901	0	0	0.75173	0.227293	POLD2
Thyroid cancer	1937-01-01	0.748639	0.125727	0.875122	0	0	0.73081	0.211568	MAPK3
Primary immunodeficiency	1938-01-01	0.757856	0.120413	0.879376	0	0	0.711022	0.197139	ADA
PPAR signaling pathway	1974-02-01	0.759149	0.119673	0.879376	0	0	0.730441	0.201279	SCP2;ACSL4
Various types of N-glycan biosynthesis	1939-01-01	0.766735	0.115354	0.884163	0	0	0.692274	0.183877	ALG13
Ferroptosis	1941-01-01	0.78353	0.105944	0.897445	0	0	0.657592	0.160417	ACSL4
Tryptophan metabolism	1942-01-01	0.791469	0.101566	0.897445	0	0	0.64152	0.150029	ALDH3A2
Cell adhesion molecules	4/148	0.795019	0.0996225	0.897445	0	0	0.729701	0.167386	ITGB1;ITGAV;NCAM1;NEO1
Retrograde endocannabinoid signaling	4/148	0.795019	0.0996225	0.897445	0	0	0.729701	0.167386	MAPK11;GNB2;GNAI2;MAPK3
Fat digestion and absorption	1943-01-01	0.799118	0.0973893	0.897445	0	0	0.626213	0.140427	SCARB1
Gastric cancer	4/149	0.799287	0.0972973	0.897445	0	0	0.724631	0.162343	AKT2;HGF;PIK3R2;MAPK3
ABC transporters	1945-01-01	0.813584	0.0895977	0.909509	0	0	0.597687	0.123307	ABCA5
Pathways of neurodegeneration	14/475	0.831356	0.0802128	0.912355	0	0	0.795467	0.14692	HTRA2;KLC1;PSMA7;ATXN2L;PSMA6;MAPK11;PSMA3;PPP3CB;PSMD4;DLG4;ATXN1L;PLCG1;TARDBP;MAPK3
Amino sugar and nucleotide sugar metabolism	1948-01-01	0.833356	0.0791695	0.912355	0	0	0.559449	0.101984	GMPPA
Valine, leucine and isoleucine degradation	1948-01-01	0.833356	0.0791695	0.912355	0	0	0.559449	0.101984	ALDH3A2
Transcriptional misregulation in cancer	5/192	0.835836	0.0778791	0.912355	0	0	0.701771	0.125844	CCNT2;NCOR1;SP1;JMJD1C;TCF3
ECM-receptor interaction	1988-02-01	0.837392	0.077071	0.912355	0	0	0.611086	0.108445	ITGB1;ITGAV
Sphingolipid metabolism	1949-01-01	0.83947	0.075995	0.912355	0	0	0.547766	0.0958507	CERS5
Malaria	1950-01-01	0.845359	0.0729586	0.912355	0	0	0.536559	0.0901383	HGF
N-Glycan biosynthesis	1950-01-01	0.845359	0.0729586	0.912355	0	0	0.536559	0.0901383	ALG13
Hippo signaling pathway	4/163	0.851786	0.0696697	0.912355	0	0	0.660343	0.105932	DLG4;PPP2R2D;WTIP;ACTG1
Purine metabolism	3/129	0.855688	0.0676843	0.912355	0	0	0.625188	0.0974349	NME6;NT5C2;ADA
Endocrine and other factor-regulated calcium reabsorption	1953-01-01	0.861765	0.064611	0.912355	0	0	0.505525	0.0752081	GNAS
Glycosaminoglycan biosynthesis	1953-01-01	0.861765	0.064611	0.912355	0	0	0.505525	0.0752081	NDST2
Diabetic cardiomyopathy	5/203	0.868809	0.0610757	0.912355	0	0	0.662401	0.0931548	MAPK11;SP1;AKT2;PIK3R2;PDHB
Oxidative phosphorylation	3/133	0.869445	0.0607581	0.912355	0	0	0.605825	0.0847553	ATP6V0B;ATP6AP1;ATP6V1H
Alzheimer disease	10/369	0.872044	0.0594618	0.912355	0	0	0.72952	0.0998828	PSMA6;PPP3CB;PSMA3;PSMD4;AKT2;PIK3R2;NAE1;KLC1;PSMA7;MAPK3
Huntington disease	8/306	0.875807	0.0575918	0.912355	0	0	0.7034	0.0932779	PSMA6;CREB3;PSMA3;PSMD4;DLG4;SP1;KLC1;PSMA7
Calcium signaling pathway	6/240	0.876716	0.0571409	0.912355	0	0	0.672247	0.0884488	PPP3CB;HGF;VEGFB;GNAS;PLCG1;FGFR3
Amoebiasis	2/102	0.891903	0.0496823	0.924402	0	0	0.525151	0.060076	GNAS;PIK3R2
NOD-like receptor signaling pathway	4/181	0.901772	0.0449034	0.930332	0	0	0.592631	0.0612744	MAPK11;HSP90AB1;PKN1;MAPK3
Cytosolic DNA-sensing pathway	1963-01-01	0.904893	0.0434026	0.930332	0	0	0.423768	0.0423505	POLR1C
RIG-I-like receptor signaling pathway	1970-01-01	0.926806	0.0330113	0.949049	0	0	0.380638	0.0289328	MAPK11
Cardiac muscle contraction	1987-01-01	0.961265	0.0171568	0.980414	0	0	0.305125	0.012054	TNNT2
Viral protein interaction with cytokine and cytokine receptor	1/100	0.976199	0.0104618	0.989513	0	0	0.264879	0.00638074	ACKR3
Pancreatic secretion	1/102	0.977917	0.0096979	0.989513	0	0	0.259606	0.00579707	GNAS
Drug metabolism	1/108	0.982365	0.00772729	0.9901	0	0	0.244972	0.00435873	NME6
Herpes simplex virus 1 infection	9/498	0.994916	0.00221358	0.998818	0	0	0.478044	0.00243657	EIF2B4;NXF1;SRC;AKT2;PIK3R2;TSC1;JAK2;SRSF6;SRPK1
Cytokine-cytokine receptor interaction	2/295	0.999806	8.41523e-05	0.999806	0	0	0.177428	3.43798e-05	TNFRSF12A;ACKR3

## Sheet: A5SS
Term	Overlap	P-value		Adjusted P-value	Old P-value	Old Adjusted P-value	Odds Ratio	Combined Score	Genes
Ribosome	22/158	1.66862e-06	5.77764	0.00042383	0	0	3.58355	47.6738	MRPS17;RPS9;RPS7;MRPS14;RPL34;RPL23;RPLP1;RPL12;RPS27L;MRPL24;RPL7;MRPL22;MRPL33;RPS16;RPL18A;RPS18;RPL27A;RPL27;RPS11;UBA52;RPS24;RPL19
Spliceosome	18/150	0.000106791	3.97146	0.0135625	0	0	3.00744	27.502	PRPF38B;RBM8A;PRPF40A;THOC2;WBP11;PQBP1;HNRNPK;PRPF18;SNRNP70;TRA2A;SNRPA1;SRSF5;HNRNPC;HNRNPA1;SRSF7;SMNDC1;CTNNBL1;SNRPB
HIF-1 signaling pathway	12/109	0.0030198	2.52002	0.206262	0	0	2.71452	15.7512	EGLN1;TFRC;ANGPT1;RPS6KB1;MKNK2;ENO1;PLCG1;ELOC;ALDOA;ENO3;GAPDH;PDK1
Coronavirus disease	20/232	0.00324822	2.48835	0.206262	0	0	2.07668	11.8986	RPS9;RPS7;CHUK;RPL34;RPL23;RPLP1;RPL12;RPS27L;RPL7;RPS16;RPL18A;RPS18;RPL27A;RPL27;PLCG1;IKBKG;RPS11;UBA52;RPS24;RPL19
RNA degradation	1979-09-01	0.00770624	2.11316	0.372989	0	0	2.81542	13.6991	EXOSC7;PAN2;CNOT6L;PAN3;CNOT1;EXOSC8;ENO1;ENO3;DCPS
Ubiquitin mediated proteolysis	13/140	0.00881076	2.05499	0.372989	0	0	2.24511	10.6234	UBE2I;UBE2D3;HUWE1;ANAPC10;COP1;UBR5;UBA3;UBA1;BIRC6;TRIP12;ELOC;UBA52;BIRC2
Small cell lung cancer	1992-09-01	0.0197297	1.70488	0.659275	0	0	2.37283	9.31485	ZBTB17;CHUK;MAX;CKS2;BAX;IKBKG;BIRC2;PTK2;CKS1B
Cell cycle	11/124	0.0207646	1.68268	0.659275	0	0	2.13172	8.25938	ORC5;YWHAE;CCNA2;ZBTB17;MCM7;YWHAQ;CHEK2;MCM4;CDC7;ATM;ANAPC10
Citrate cycle (TCA cycle)	2023-04-30	0.040971	1.38752	0.939711	0	0	3.35736	10.7264	IDH3G;IDH1;OGDHL;PCK2
RNA polymerase	1931-04-01	0.0454635	1.34234	0.939711	0	0	3.23285	9.99223	POLR1B;POLR1D;POLR3H;POLR2H
Glycosphingolipid biosynthesis	1945-05-01	0.0464682	1.33284	0.939711	0	0	2.72898	8.37519	B4GALT2;B4GALT3;B4GALNT1;A4GALT;ST6GALNAC6
Pancreatic cancer	1976-07-01	0.0492684	1.30743	0.939711	0	0	2.21653	6.67279	RALB;CHUK;RPS6KB1;BAX;BRAF;IKBKG;RAC1
Base excision repair	1933-04-01	0.0552375	1.25777	0.939711	0	0	3.00958	8.71607	FEN1;PARP3;APEX1;HMGB1
Viral carcinogenesis	14/203	0.0645606	1.19003	0.939711	0	0	1.62124	4.44243	YWHAE;VAC14;GSN;HDAC3;MRPS18B;GTF2E2;CCNA2;DLG1;HNRNPK;YWHAQ;RASA2;BAX;IKBKG;RAC1
RNA transport	13/186	0.0671752	1.17279	0.939711	0	0	1.64415	4.43996	PRMT5;UBE2I;RBM8A;PYM1;THOC2;THOC7;SRRM1;EIF5;XPO1;SUMO1;NUP35;NUP54;NUP98
Acute myeloid leukemia	1967-06-01	0.0736074	1.13308	0.939711	0	0	2.14748	5.60281	CCNA2;PER2;CHUK;RPS6KB1;BRAF;IKBKG
Protein processing in endoplasmic reticulum	12/171	0.0746739	1.12683	0.939711	0	0	1.65063	4.28276	EDEM3;HSP90AB1;PRKCSH;UBE2D3;SEL1L;CANX;BAX;PREB;UGGT2;SEC23B;MBTPS2;SEC31A
Shigellosis	16/246	0.0769681	1.11369	0.939711	0	0	1.52278	3.90495	CHUK;UBE2D3;ARPC5L;PTK2;ARPC2;RPS6KB1;AKT1S1;TIFA;BAX;ATM;PLCG1;IKBKG;RAC1;TLR5;UBA52;SQSTM1
Mannose type O-glycan biosynthesis	2023-03-23	0.0779884	1.10797	0.939711	0	0	3.27072	8.34424	B3GALNT2;B4GALT2;B4GALT3
Ubiquinone and other terpenoid-quinone biosynthesis	2023-02-11	0.0815843	1.08839	0.939711	0	0	4.84277	12.1366	COQ2;COQ7
Pathogenic Escherichia coli infection	13/197	0.0948843	1.02281	0.939711	0	0	1.54497	3.63854	ARHGEF12;CHUK;WIPF2;ARPC5L;ARPC2;GNA12;MYH9;BAX;TMBIM6;IKBKG;RAC1;TLR5;GAPDH
Apoptosis	10/142	0.0959516	1.01795	0.939711	0	0	1.65542	3.88016	DFFB;DAXX;PARP3;CHUK;HTRA2;BAX;ATM;BIRC6;IKBKG;BIRC2
Pyrimidine metabolism	1956-05-01	0.0988541	1.00501	0.939711	0	0	2.13914	4.95021	NT5C3B;DTYMK;UCK2;TK1;TYMS
p53 signaling pathway	1973-06-01	0.101333	0.99425	0.939711	0	0	1.95456	4.47465	COP1;ZMAT3;CHEK2;EI24;BAX;ATM
Human T-cell leukemia virus 1 infection	14/219	0.103653	0.984418	0.939711	0	0	1.49344	3.38519	VAC14;RANBP3;CHUK;ANAPC10;ELK4;CCNA2;DLG1;XPO1;CHEK2;CANX;TSPO;BAX;ATM;IKBKG
Hippo signaling pathway	11/163	0.104816	0.979571	0.939711	0	0	1.58152	3.56718	YWHAE;RASSF1;DLG1;FRMD6;YWHAQ;WWC1;DVL1;FZD6;TEAD2;BIRC2;SAV1
Notch signaling pathway	1959-05-01	0.116783	0.932619	0.939711	0	0	2.01998	4.33777	TLE4;JAG2;TLE3;TLE1;DVL1
Hepatocellular carcinoma	11/168	0.12217	0.913037	0.939711	0	0	1.53075	3.21816	SMARCE1;PHF10;RPS6KB1;SHC1;DPF1;DVL1;FZD6;BAX;BRAF;PLCG1;ARID1A
Bacterial invasion of epithelial cells	1977-06-01	0.122458	0.912013	0.939711	0	0	1.84405	3.87249	DNM3;ARPC2;SHC1;ARPC5L;RAC1;PTK2
Basal transcription factors	1945-04-01	0.134496	0.871292	0.939711	0	0	2.12739	4.26801	TAF10;TAF6;TAF4;GTF2E2
Fc gamma R-mediated phagocytosis	1997-07-01	0.134714	0.870587	0.939711	0	0	1.69746	3.40274	GSN;ARPC2;RPS6KB1;SPHK1;ARPC5L;PLCG1;RAC1
Salmonella infection	15/249	0.135545	0.867918	0.939711	0	0	1.40128	2.80039	HSP90AB1;CHUK;ARPC5L;KLC1;PIK3C2B;ARPC2;FLNA;BAX;IKBKG;RAC1;DYNLRB1;TLR5;GAPDH;BIRC2;VPS16
Thiamine metabolism	2023-02-15	0.138993	0.857008	0.939711	0	0	3.35199	6.61459	AK5;NTPCR
mRNA surveillance pathway	1998-07-01	0.139951	0.854024	0.939711	0	0	1.67872	3.30114	RBM8A;PAPOLA;CSTF1;PYM1;PPP2R5A;SMG7;SRRM1
mTOR signaling pathway	10/154	0.1412	0.850166	0.939711	0	0	1.51651	2.96869	ATP6V1G1;CLIP1;CHUK;RPS6KB1;NPRL2;DVL1;FZD6;AKT1S1;TSC1;BRAF
Cytosolic DNA-sensing pathway	1963-05-01	0.142879	0.845031	0.939711	0	0	1.88028	3.65856	CHUK;POLR1D;POLR3H;IKBKG;POLR2H
Lysine degradation	1963-05-01	0.142879	0.845031	0.939711	0	0	1.88028	3.65856	KMT2D;KMT5C;SMYD2;PLOD3;COLGALT1
Insulin signaling pathway	9/137	0.149559	0.825188	0.939711	0	0	1.53499	2.91659	RPS6KB1;SHC1;MKNK2;PHKG2;FLOT1;TSC1;BRAF;PRKAB1;PCK2
Yersinia infection	9/137	0.149559	0.825188	0.939711	0	0	1.53499	2.91659	ARHGEF12;ARPC2;CHUK;WIPF2;ARPC5L;PLCG1;IKBKG;RAC1;PTK2
Other types of O-glycan biosynthesis	1947-04-01	0.150711	0.821856	0.939711	0	0	2.02823	3.8382	B4GALT2;B4GALT3;PLOD3;COLGALT1
MAPK signaling pathway	17/294	0.15235	0.817159	0.939711	0	0	1.34164	2.52439	DAXX;CHUK;ANGPT1;MAX;VEGFB;BRAF;MAPK8IP3;DUSP16;ELK4;MAPK7;RASA2;GNA12;MKNK2;FLNA;MAPKAPK5;IKBKG;RAC1
AMPK signaling pathway	8/120	0.158366	0.800337	0.939711	0	0	1.55888	2.87278	CCNA2;RPS6KB1;AKT1S1;PPP2R5A;TSC1;PRKAB1;PCK2;RAB11B
Valine, leucine and isoleucine degradation	1948-04-01	0.159085	0.798371	0.939711	0	0	1.98203	3.64359	ALDH6A1;ACAA2;HIBADH;ACSF3
Glycolysis / Gluconeogenesis	1967-05-01	0.171237	0.766402	0.977137	0	0	1.7586	3.10341	ENO1;ALDOA;ENO3;GAPDH;PCK2
NF-kappa B signaling pathway	7/104	0.173349	0.76108	0.977137	0	0	1.57439	2.75904	CYLD;UBE2I;CHUK;ATM;PLCG1;IKBKG;BIRC2
Colorectal cancer	1986-06-01	0.176962	0.75212	0.977137	0	0	1.63582	2.83296	RALB;RPS6KB1;BAX;BRAF;RAC1;MLH1
Epithelial cell signaling in Helicobacter pylori infection	1970-05-01	0.193811	0.712621	0.999993	0	0	1.67717	2.75202	ATP6V1G1;CHUK;IKBKG;RAC1;PLCG1
Glycosaminoglycan biosynthesis	1953-04-01	0.203282	0.691902	0.999993	0	0	1.77931	2.83473	B4GALT2;NDST2;B4GALT3;EXT2
DNA replication	1936-03-01	0.209446	0.678929	0.999993	0	0	1.9809	3.09673	FEN1;MCM7;MCM4
Transcriptional misregulation in cancer	11/192	0.225131	0.647565	0.999993	0	0	1.32609	1.9773	ELK4;CCNA2;PER2;ZBTB17;NCOR1;MAX;BAX;ATM;RUNX2;PTK2;BIRC2
Primary immunodeficiency	1938-03-01	0.232788	0.633039	0.999993	0	0	1.86751	2.72214	RFX5;RFXANK;IKBKG
Chronic myeloid leukemia	1976-05-01	0.241725	0.616679	0.999993	0	0	1.53495	2.17956	CHUK;SHC1;BAX;BRAF;IKBKG
Pathways in cancer	27/531	0.2434	0.613679	0.999993	0	0	1.17059	1.6541	HSP90AB1;RALB;MAX;GNAI3;CKS1B;RASSF1;DVL1;GNA12;PLCG1;ELOC;IKBKG;RAC1;JAG2;EGLN1;ZBTB17;ARHGEF12;CHUK;FZD6;VEGFB;BRAF;MLH1;PTK2;CCNA2;RPS6KB1;CKS2;BAX;BIRC2
Various types of N-glycan biosynthesis	1939-03-01	0.244631	0.611489	0.999993	0	0	1.81554	2.5563	B4GALT2;B4GALT3;ALG11
Terpenoid backbone biosynthesis	2023-02-22	0.251709	0.599101	0.999993	0	0	2.17799	3.0045	RCE1;DHDDS
Antigen processing and presentation	1978-05-01	0.25836	0.587774	0.999993	0	0	1.49274	2.02028	HSP90AB1;CANX;RFX5;RFXANK;IFI30
VEGF signaling pathway	1959-04-01	0.260286	0.584549	0.999993	0	0	1.58471	2.13297	SPHK1;RAC1;PLCG1;PTK2
Fluid shear stress and atherosclerosis	8/139	0.267839	0.572126	0.999993	0	0	1.33145	1.75401	HSP90AB1;MAPK7;SUMO1;CHUK;IKBKG;RAC1;SQSTM1;PTK2
Homologous recombination	1941-03-01	0.268577	0.570932	0.999993	0	0	1.71981	2.26089	RAD54L;ATM;PALB2
Neurotrophin signaling pathway	7/119	0.269101	0.570084	0.999993	0	0	1.36246	1.78845	YWHAE;MAPK7;SHC1;BAX;BRAF;PLCG1;RAC1
Parkinson disease	13/249	0.301742	0.520365	0.999993	0	0	1.20124	1.43931	DAXX;COX4I1;GNAI3;HTRA2;KLC1;PSMA3;PSMD4;NDUFS4;BAX;UBA1;NDUFS1;PLCG1;UBA52
ErbB signaling pathway	1985-05-01	0.318364	0.497077	0.999993	0	0	1.36163	1.55847	RPS6KB1;SHC1;BRAF;PLCG1;PTK2
Parathyroid hormone synthesis, secretion and action	6/106	0.322834	0.491021	0.999993	0	0	1.30729	1.47804	AKAP13;GNA12;GNAI3;BRAF;MEF2D;RUNX2
Thermogenesis	12/232	0.323045	0.490737	0.999993	0	0	1.18912	1.34366	SMARCE1;KDM3A;RPS6KB1;NDUFAF4;COX4I1;DPF1;AKT1S1;NDUFS4;TSC1;NDUFS1;ARID1A;PRKAB1
Ribosome biogenesis in eukaryotes	6/108	0.338494	0.47045	0.999993	0	0	1.28152	1.3882	NOP56;LSG1;NOP58;XPO1;SBDS;REXO5
Amino sugar and nucleotide sugar metabolism	1948-03-01	0.35361	0.451475	0.999993	0	0	1.45175	1.50918	CYB5R1;AMDHD2;PGM3
Adipocytokine signaling pathway	1969-04-01	0.360183	0.443477	0.999993	0	0	1.3402	1.36854	CHUK;IKBKG;PRKAB1;PCK2
Renal cell carcinoma	1969-04-01	0.360183	0.443477	0.999993	0	0	1.3402	1.36854	EGLN1;BRAF;ELOC;RAC1
RIG-I-like receptor signaling pathway	1970-04-01	0.370266	0.431486	0.999993	0	0	1.31983	1.31129	CYLD;SIKE1;CHUK;IKBKG
N-Glycan biosynthesis	1950-03-01	0.37783	0.422704	0.999993	0	0	1.38983	1.35274	B4GALT2;B4GALT3;ALG11
Vibrio cholerae infection	1950-03-01	0.37783	0.422704	0.999993	0	0	1.38983	1.35274	ATP6V1G1;KDELR1;PLCG1
Leukocyte transendothelial migration	6/114	0.385839	0.413594	0.999993	0	0	1.20994	1.15227	CTNND1;GNAI3;CD99L2;PLCG1;RAC1;PTK2
Non-small cell lung cancer	1972-04-01	0.390393	0.408498	0.999993	0	0	1.28087	1.20479	RASSF1;BAX;BRAF;PLCG1
Autophagy	7/137	0.39713	0.401068	0.999993	0	0	1.1727	1.08298	RUBCN;RPS6KB1;AKT1S1;TSC1;NRBF2;HMGB1;SQSTM1
IL-17 signaling pathway	1994-05-01	0.397386	0.400787	0.999993	0	0	1.22336	1.12897	HSP90AB1;MAPK7;CHUK;IKBKG;MAPK6
Circadian rhythm	1931-02-01	0.398048	0.400065	0.999993	0	0	1.50136	1.38302	PER2;PRKAB1
Galactose metabolism	1931-02-01	0.398048	0.400065	0.999993	0	0	1.50136	1.38302	B4GALT2;GAA
Inositol phosphate metabolism	1973-04-01	0.400424	0.39748	0.999993	0	0	1.26224	1.15525	INPP4A;ALDH6A1;PLCG1;PIK3C2B
Human cytomegalovirus infection	11/225	0.402592	0.395135	0.999993	0	0	1.11965	1.01869	AKAP13;ARHGEF12;CHUK;RPS6KB1;GNA12;GNAI3;BAX;TSC1;IKBKG;RAC1;PTK2
Axon guidance	9/182	0.40724	0.390149	0.999993	0	0	1.13303	1.01786	EPHA7;ARHGEF12;RYK;SEMA4C;GNAI3;PLXNB2;PLCG1;RAC1;PTK2
Proteoglycans in cancer	10/205	0.413857	0.38315	0.999993	0	0	1.11687	0.985346	CD63;TFAP4;ARHGEF12;RPS6KB1;FZD6;FLNA;BRAF;PLCG1;RAC1;PTK2
Glioma	1975-04-01	0.420392	0.376345	0.999993	0	0	1.22656	1.0629	SHC1;BAX;BRAF;PLCG1
Phosphatidylinositol signaling system	1997-05-01	0.423663	0.37298	0.999993	0	0	1.18328	1.01622	INPP4A;PIP4P1;PLCG1;IP6K1;PIK3C2B
Sphingolipid signaling pathway	6/119	0.425318	0.371286	0.999993	0	0	1.1561	0.98837	SPHK1;GNA12;GNAI3;PPP2R5A;BAX;RAC1
Fanconi anemia pathway	1954-03-01	0.425605	0.370993	0.999993	0	0	1.28055	1.0939	REV1;MLH1;PALB2
Fructose and mannose metabolism	1933-02-01	0.42897	0.367573	0.999993	0	0	1.40435	1.18859	ALDOA;KHK
SNARE interactions in vesicular transport	1933-02-01	0.42897	0.367573	0.999993	0	0	1.40435	1.18859	STX8;USE1
Choline metabolism in cancer	1998-05-01	0.432378	0.364137	0.999993	0	0	1.17049	0.981406	RPS6KB1;SLC44A2;TSC1;PLCG1;RAC1
Amyotrophic lateral sclerosis	17/364	0.43375	0.362761	0.999993	0	0	1.06701	0.891261	DAXX;COX4I1;KLC1;PSMA3;PSMD4;NDUFS4;BAX;NUP35;MATR3;NDUFS1;NUP54;NUP98;NRBF2;RAC1;HNRNPA1;SQSTM1;SRSF7
Spinocerebellar ataxia	7/143	0.440497	0.356057	0.999993	0	0	1.12061	0.918732	NOP56;PSMA3;PSMD4;ATP2A2;NRBF2;PUM1;PUM2
Non-homologous end-joining	2023-01-13	0.442596	0.353993	0.999993	0	0	1.81369	1.47833	FEN1
Rap1 signaling pathway	10/210	0.443593	0.353015	0.999993	0	0	1.08867	0.884918	SIPA1L1;RALB;ANGPT1;CTNND1;GNAI3;VEGFB;KRIT1;BRAF;PLCG1;RAC1
Wnt signaling pathway	8/166	0.446385	0.350291	0.999993	0	0	1.10236	0.889131	TLE4;TLE3;TLE1;RYK;DVL1;FZD6;RSPO2;RAC1
Progesterone-mediated oocyte maturation	5/100	0.44972	0.347058	0.999993	0	0	1.14573	0.915587	CCNA2;HSP90AB1;GNAI3;BRAF;ANAPC10
Synaptic vesicle cycle	1978-04-01	0.450027	0.346761	0.999993	0	0	1.17665	0.939491	DNM3;ATP6V1G1;UNC13A;AP2M1
Human immunodeficiency virus 1 infection	10/212	0.455451	0.341558	0.999993	0	0	1.07777	0.847632	CHUK;RPS6KB1;GNAI3;BAX;ATM;PLCG1;ELOC;IKBKG;RAC1;PTK2
Longevity regulating pathway	5/102	0.466921	0.330756	0.999993	0	0	1.12199	0.854501	RPS6KB1;AKT1S1;BAX;TSC1;PRKAB1
Breast cancer	7/147	0.469145	0.328693	0.999993	0	0	1.08836	0.823718	JAG2;RPS6KB1;SHC1;DVL1;FZD6;BAX;BRAF
Endometrial cancer	1958-03-01	0.472037	0.326024	0.999993	0	0	1.18717	0.891209	BAX;BRAF;MLH1
Phospholipase D signaling pathway	7/148	0.476254	0.322161	0.999993	0	0	1.08058	0.801581	DNM3;RALB;SHC1;SPHK1;GNA12;TSC1;PLCG1
Gastric cancer	7/149	0.483339	0.315748	0.999993	0	0	1.07292	0.780052	RPS6KB1;SHC1;DVL1;FZD6;BAX;BRAF;MLH1
Thyroid cancer	1937-02-01	0.48815	0.311446	0.999993	0	0	1.24359	0.891818	BAX;BRAF
Long-term depression	1960-03-01	0.494607	0.30574	0.999993	0	0	1.1454	0.806351	GNA12;GNAI3;BRAF
Basal cell carcinoma	1963-03-01	0.527527	0.277755	0.999993	0	0	1.08796	0.695808	DVL1;FZD6;BAX
Bladder cancer	1941-02-01	0.543339	0.264929	0.999993	0	0	1.11581	0.680668	RASSF1;BRAF
Necroptosis	7/159	0.552404	0.257743	0.999993	0	0	1.0018	0.594546	CYLD;HSP90AB1;USP21;BAX;HMGB1;SQSTM1;BIRC2
Endocytosis	11/252	0.552747	0.257474	0.999993	0	0	0.992791	0.588581	DNM3;ACAP1;TFRC;ARPC2;WIPF2;ARPC5L;VPS37C;VPS37A;STAM;AP2M1;RAB11B
PD-L1 expression and PD-1 checkpoint pathway in cancer	1989-04-01	0.553551	0.256842	0.999993	0	0	1.02378	0.605468	CHUK;RPS6KB1;IKBKG;PLCG1
Fatty acid biosynthesis	2023-01-18	0.554858	0.255818	0.999993	0	0	1.27991	0.753925	ACSF3
Ras signaling pathway	10/232	0.570534	0.243719	0.999993	0	0	0.979639	0.549756	RASSF1;RALB;CHUK;ANGPT1;SHC1;RASA2;VEGFB;PLCG1;IKBKG;RAC1
Mitophagy	1968-03-01	0.579622	0.236855	0.999993	0	0	1.004	0.547562	BNIP3L;SQSTM1;UBA52
Th1 and Th2 cell differentiation	1992-04-01	0.579956	0.236605	0.999993	0	0	0.988727	0.538662	JAG2;CHUK;IKBKG;PLCG1
One carbon pool by folate	2023-01-20	0.59316	0.226828	0.999993	0	0	1.14507	0.598057	TYMS
Steroid biosynthesis	2023-01-20	0.59316	0.226828	0.999993	0	0	1.14507	0.598057	SOAT1
Proteasome	1946-02-01	0.60629	0.21732	0.999993	0	0	0.988753	0.49477	PSMA3;PSMD4
Pathways of neurodegeneration	20/475	0.610881	0.214044	0.999993	0	0	0.955161	0.470755	DAXX;COX4I1;FZD6;HTRA2;ATP2A2;BRAF;KLC1;PSMA3;PSMD4;DVL1;NDUFS4;MAP3K10;BAX;UBA1;NDUFS1;NRBF2;PLCG1;RAC1;UBA52;SQSTM1
Pantothenate and CoA biosynthesis	2023-01-21	0.611059	0.213917	0.999993	0	0	1.08776	0.535787	COASY
Chemokine signaling pathway	8/192	0.611528	0.213584	0.999993	0	0	0.94529	0.464888	CHUK;SHC1;GNAI3;BRAF;PLCG1;IKBKG;RAC1;PTK2
Tight junction	7/169	0.617162	0.209601	0.999993	0	0	0.939468	0.45341	MYL6;DLG1;ARPC2;ARPC5L;MYH9;RAC1;PRKAB1
Pyruvate metabolism	1947-02-01	0.61806	0.208969	0.999993	0	0	0.96673	0.465161	HAGH;PCK2
Prostate cancer	1997-04-01	0.621902	0.206278	0.999993	0	0	0.935324	0.444254	HSP90AB1;CHUK;BRAF;IKBKG
Regulation of actin cytoskeleton	9/218	0.623479	0.205178	0.999993	0	0	0.936083	0.442243	GSN;ARHGEF12;ARPC2;GNA12;ARPC5L;MYH9;BRAF;RAC1;PTK2
PPAR signaling pathway	1974-03-01	0.637132	0.195771	0.999993	0	0	0.918869	0.414206	SLC27A1;PLIN2;PCK2
Mismatch repair	2023-01-23	0.644531	0.190756	0.999993	0	0	0.988766	0.434299	MLH1
Protein export	2023-01-23	0.644531	0.190756	0.999993	0	0	0.988766	0.434299	SRPRB
Proximal tubule bicarbonate reclamation	2023-01-23	0.644531	0.190756	0.999993	0	0	0.988766	0.434299	PCK2
AGE-RAGE signaling pathway in diabetic complications	4/100	0.645762	0.189927	0.999993	0	0	0.905952	0.396195	VEGFB;BAX;PLCG1;RAC1
Cholesterol metabolism	1950-02-01	0.651741	0.185925	0.999993	0	0	0.906167	0.387938	SOAT1;TSPO
Osteoclast differentiation	5/127	0.661244	0.179638	0.999993	0	0	0.890901	0.368505	CYLD;CHUK;IKBKG;RAC1;SQSTM1
Purine metabolism	5/129	0.674657	0.170917	0.999993	0	0	0.876439	0.344924	NT5C3B;GMPR;AK5;NTPCR;PAICS
C-type lectin receptor signaling pathway	4/104	0.675993	0.170058	0.999993	0	0	0.869531	0.340485	CYLD;ARHGEF12;CHUK;IKBKG
T cell receptor signaling pathway	4/104	0.675993	0.170058	0.999993	0	0	0.869531	0.340485	DLG1;CHUK;PLCG1;IKBKG
Toll-like receptor signaling pathway	4/104	0.675993	0.170058	0.999993	0	0	0.869531	0.340485	CHUK;IKBKG;RAC1;TLR5
Non-alcoholic fatty liver disease	6/155	0.681101	0.166789	0.999993	0	0	0.875112	0.336082	COX4I1;NDUFS4;BAX;NDUFS1;RAC1;PRKAB1
Endocrine and other factor-regulated calcium reabsorption	1953-02-01	0.683012	0.165571	0.999993	0	0	0.852729	0.325096	DNM3;AP2M1
Cellular senescence	6/156	0.687062	0.163004	0.999993	0	0	0.869233	0.32625	CCNA2;CHEK2;TSC1;ATM;RAD1;SQSTM1
FoxO signaling pathway	5/131	0.687713	0.162593	0.999993	0	0	0.862437	0.322883	CHUK;BRAF;ATM;PRKAB1;PCK2
Folate biosynthesis	2023-01-26	0.689421	0.161516	0.999993	0	0	0.869977	0.323547	PTS
Hepatitis C	6/157	0.69295	0.159298	0.999993	0	0	0.863431	0.316704	YWHAE;YWHAQ;CHUK;BAX;BRAF;IKBKG
PI3K-Akt signaling pathway	14/354	0.695156	0.157918	0.999993	0	0	0.894029	0.325086	YWHAE;HSP90AB1;CHUK;ANGPT1;PKN3;VEGFB;PPP2R5A;TSC1;PTK2;YWHAQ;RPS6KB1;IKBKG;RAC1;PCK2
B cell receptor signaling pathway	1981-03-01	0.696973	0.156784	0.999993	0	0	0.836099	0.301839	CHUK;IKBKG;RAC1
Th17 cell differentiation	4/107	0.69746	0.156481	0.999993	0	0	0.844072	0.304128	HSP90AB1;CHUK;PLCG1;IKBKG
Huntington disease	12/306	0.697709	0.156326	0.999993	0	0	0.886331	0.319038	PSMA3;PSMD4;COX4I1;NDUFS4;MAP3K10;BAX;NDUFS1;NRBF2;POLR2H;KLC1;TAF4;AP2M1
Human papillomavirus infection	13/331	0.700311	0.154709	0.999993	0	0	0.887617	0.316197	ATP6V1G1;CHUK;FZD6;PPP2R5A;TSC1;PTK2;CCNA2;DLG1;RPS6KB1;DVL1;BAX;ATM;IKBKG
Vascular smooth muscle contraction	5/133	0.700409	0.154648	0.999993	0	0	0.848872	0.302276	MYL6;ARHGEF12;GNA12;MYH9;BRAF
Collecting duct acid secretion	2023-01-27	0.703089	0.15299	0.999993	0	0	0.836473	0.294666	ATP6V1G1
Fatty acid elongation	2023-01-27	0.703089	0.15299	0.999993	0	0	0.836473	0.294666	ACAA2
Insulin resistance	4/108	0.704384	0.15219	0.999993	0	0	0.835912	0.29293	SLC27A1;RPS6KB1;PRKAB1;PCK2
Legionellosis	1957-02-01	0.721087	0.142012	0.999993	0	0	0.790546	0.258505	CR1L;TLR5
Hepatitis B	6/162	0.721275	0.141899	0.999993	0	0	0.835536	0.272999	CCNA2;YWHAQ;CHUK;BAX;BRAF;IKBKG
Apelin signaling pathway	5/137	0.724715	0.139833	0.999993	0	0	0.822975	0.264979	RPS6KB1;SPHK1;GNAI3;PRKAB1;MEF2D
Toxoplasmosis	4/112	0.730931	0.136124	0.999993	0	0	0.804783	0.252249	CHUK;GNAI3;IKBKG;BIRC2
Pentose phosphate pathway	2023-01-30	0.740591	0.130422	0.999993	0	0	0.749823	0.225177	ALDOA
beta-Alanine metabolism	2023-01-30	0.740591	0.130422	0.999993	0	0	0.749823	0.225177	ALDH6A1
Cardiac muscle contraction	1987-03-01	0.742057	0.129563	0.999993	0	0	0.776133	0.231544	COX4I1;TPM1;ATP2A2
Glycerolipid metabolism	1961-02-01	0.75523	0.121921	0.999993	0	0	0.736795	0.206843	AGK;MBOAT2
Hypertrophic cardiomyopathy	1990-03-01	0.762515	0.117752	0.999993	0	0	0.749252	0.203147	TPM1;ATP2A2;PRKAB1
Influenza A	6/172	0.772326	0.112199	0.999993	0	0	0.784789	0.202749	XPO1;CHUK;BAX;NUP98;IKBKG;RAB11B
Growth hormone synthesis, secretion and action	4/119	0.773011	0.111814	0.999993	0	0	0.755518	0.194517	SHC1;GNAI3;PLCG1;PTK2
Propanoate metabolism	1934-01-01	0.783338	0.106051	0.999993	0	0	0.658798	0.160872	ALDH6A1
Thyroid hormone signaling pathway	4/121	0.784037	0.105664	0.999993	0	0	0.742525	0.180656	NCOR1;HDAC3;ATP2A2;PLCG1
Focal adhesion	7/201	0.785149	0.105048	0.999993	0	0	0.78318	0.189437	SHC1;VEGFB;FLNA;BRAF;RAC1;PTK2;BIRC2
Starch and sucrose metabolism	1936-01-01	0.801996	0.0958279	0.999993	0	0	0.621087	0.137044	GAA
Fc epsilon RI signaling pathway	1968-02-01	0.806318	0.0934935	0.999993	0	0	0.658408	0.14174	RAC1;PLCG1
Tuberculosis	6/180	0.807876	0.0926553	0.999993	0	0	0.74839	0.159667	ARHGEF12;CR1L;SPHK1;RFX5;BAX;RFXANK
NOD-like receptor signaling pathway	6/181	0.811999	0.0904445	0.999993	0	0	0.744075	0.154958	YWHAE;HSP90AB1;CHUK;TRIP6;IKBKG;BIRC2
Cushing syndrome	5/155	0.816455	0.0880676	0.999993	0	0	0.723532	0.14672	KMT2D;DVL1;FZD6;GNAI3;BRAF
Central carbon metabolism in cancer	1970-02-01	0.819063	0.0866826	0.999993	0	0	0.638976	0.127536	IDH1;PDK1
Oocyte meiosis	4/129	0.823922	0.084114	0.999993	0	0	0.694711	0.134551	YWHAE;YWHAQ;PPP2R5A;ANAPC10
Adherens junction	1971-02-01	0.82515	0.0834674	0.999993	0	0	0.629683	0.121019	CTNND1;RAC1
Melanogenesis	3/101	0.826473	0.0827712	0.999993	0	0	0.664768	0.126697	DVL1;FZD6;GNAI3
Alzheimer disease	13/369	0.829217	0.081332	0.999993	0	0	0.791269	0.148184	CHUK;COX4I1;FZD6;ATP2A2;BRAF;KLC1;PSMA3;PSMD4;DVL1;NDUFS4;NDUFS1;NRBF2;GAPDH
Melanoma	1972-02-01	0.831051	0.0803722	0.999993	0	0	0.620655	0.114861	BAX;BRAF
Chagas disease	3/102	0.831484	0.0801459	0.999993	0	0	0.658019	0.121433	CHUK;GNAI3;IKBKG
Pancreatic secretion	3/102	0.831484	0.0801459	0.999993	0	0	0.658019	0.121433	ATP2A2;RAB27B;RAC1
Natural killer cell mediated cytotoxicity	4/131	0.832884	0.0794153	0.999993	0	0	0.683699	0.125021	SHC1;BRAF;PLCG1;RAC1
Lipid and atherosclerosis	7/215	0.838567	0.0764621	0.999993	0	0	0.729926	0.128511	HSP90AB1;CHUK;BAX;PLCG1;IKBKG;RAC1;PTK2
Oxidative phosphorylation	4/133	0.841464	0.0749647	0.999993	0	0	0.673028	0.116173	ATP6V1G1;COX4I1;NDUFS4;NDUFS1
Ferroptosis	1941-01-01	0.841916	0.0747313	0.999993	0	0	0.543309	0.09349	TFRC
Neutrophil extracellular trap formation	6/189	0.842525	0.0744174	0.999993	0	0	0.711246	0.121874	HDAC3;CLCN4;CR1L;PLCG1;HMGB1;RAC1
Glucagon signaling pathway	3/107	0.854712	0.0681804	0.999993	0	0	0.626218	0.0983108	PHKG2;PRKAB1;PCK2
Fat digestion and absorption	1943-01-01	0.855534	0.067763	0.999993	0	0	0.517383	0.0807272	SLC27A1
Fatty acid degradation	1943-01-01	0.855534	0.067763	0.999993	0	0	0.517383	0.0807272	ACAA2
Porphyrin and chlorophyll metabolism	1943-01-01	0.855534	0.067763	0.999993	0	0	0.517383	0.0807272	HCCS
Kaposi sarcoma-associated herpesvirus infection	6/193	0.856212	0.0674186	0.999993	0	0	0.695885	0.108027	CHUK;BAX;PLCG1;IKBKG;RAC1;UBA52
Vasopressin-regulated water reabsorption	1944-01-01	0.861896	0.0645449	0.999993	0	0	0.505324	0.0751013	RAB11B
ABC transporters	1945-01-01	0.867979	0.0614906	0.999993	0	0	0.493813	0.0699177	ABCG2
TNF signaling pathway	3/112	0.875092	0.0579463	0.999993	0	0	0.597336	0.0797003	CHUK;IKBKG;BIRC2
Signaling pathways regulating pluripotency of stem cells	4/143	0.878982	0.0560202	0.999993	0	0	0.62428	0.0805267	KAT6A;DVL1;FZD6;SMARCAD1
Nucleotide excision repair	1947-01-01	0.879354	0.0558362	0.999993	0	0	0.472294	0.0607217	ERCC5
Peroxisome	1982-02-01	0.880868	0.0550892	0.999993	0	0	0.542788	0.0688514	IDH1;PEX5
Epstein-Barr virus infection	6/202	0.88345	0.0538181	0.999993	0	0	0.663616	0.0822357	CCNA2;PSMD4;CHUK;BAX;IKBKG;RAC1
Diabetic cardiomyopathy	6/203	0.886189	0.0524735	0.999993	0	0	0.660212	0.07977	COX4I1;NDUFS4;ATP2A2;NDUFS1;RAC1;GAPDH
Cocaine addiction	1949-01-01	0.88975	0.0507321	0.999993	0	0	0.452567	0.0528666	GNAI3
Ether lipid metabolism	1949-01-01	0.88975	0.0507321	0.999993	0	0	0.452567	0.0528666	PAFAH1B2
Sphingolipid metabolism	1949-01-01	0.88975	0.0507321	0.999993	0	0	0.452567	0.0528666	SPHK1
Complement and coagulation cascades	1985-02-01	0.89293	0.0491825	0.999993	0	0	0.523087	0.0592379	F8;CR1L
Arginine and proline metabolism	1950-01-01	0.894607	0.0483676	0.999993	0	0	0.443308	0.0493715	P4HA2
Cysteine and methionine metabolism	1950-01-01	0.894607	0.0483676	0.999993	0	0	0.443308	0.0493715	AHCYL1
Malaria	1950-01-01	0.894607	0.0483676	0.999993	0	0	0.443308	0.0493715	CR1L
Retrograde endocannabinoid signaling	4/148	0.894673	0.0483358	0.999993	0	0	0.602444	0.0670505	FAAH;NDUFS4;GNAI3;NDUFS1
Adrenergic signaling in cardiomyocytes	4/150	0.900431	0.0455494	0.999993	0	0	0.594129	0.0623131	TPM1;GNAI3;ATP2A2;PPP2R5A
Gap junction	1988-02-01	0.903849	0.043904	0.999993	0	0	0.50476	0.0510276	MAPK7;GNAI3
Phagosome	4/152	0.905911	0.0429147	0.999993	0	0	0.586039	0.0579092	ATP6V1G1;TFRC;CANX;RAC1
Oxytocin signaling pathway	4/154	0.911121	0.040424	0.999993	0	0	0.578164	0.0538153	MYL6;MAPK7;GNAI3;PRKAB1
Regulation of lipolysis in adipocytes	1955-01-01	0.915869	0.0381666	0.999993	0	0	0.402156	0.0353422	GNAI3
Prion disease	8/273	0.916717	0.0377649	0.999993	0	0	0.653545	0.0568302	PSMA3;PSMD4;COX4I1;NDUFS4;BAX;NDUFS1;RAC1;KLC1
Hedgehog signaling pathway	1956-01-01	0.919577	0.036412	0.999993	0	0	0.394823	0.0331027	EFCAB7
Rheumatoid arthritis	1993-02-01	0.919765	0.0363231	0.999993	0	0	0.476901	0.0398866	ATP6V1G1;ANGPT1
Glutathione metabolism	1957-01-01	0.923121	0.0347413	0.999993	0	0	0.387752	0.0310182	IDH1
Relaxin signaling pathway	3/129	0.926677	0.0330715	0.999993	0	0	0.516281	0.0393147	SHC1;GNAI3;VEGFB
Dilated cardiomyopathy	1996-02-01	0.928089	0.0324106	0.999993	0	0	0.461608	0.0344489	TPM1;ATP2A2
Circadian entrainment	1997-02-01	0.930677	0.031201	0.999993	0	0	0.456724	0.0328125	PER2;GNAI3
MicroRNAs in cancer	9/310	0.931494	0.03082	0.999993	0	0	0.646809	0.0459012	RASSF1;HNRNPK;UBE2I;MAPK7;SHC1;TPM1;ATM;BMF;PLCG1
Viral myocarditis	1960-01-01	0.932845	0.0301904	0.999993	0	0	0.367978	0.0255803	RAC1
Glycerophospholipid metabolism	1998-02-01	0.933177	0.0300359	0.999993	0	0	0.451943	0.0312565	MBOAT2;TAZ
Hematopoietic cell lineage	1999-02-01	0.935592	0.0289136	0.999993	0	0	0.44726	0.0297769	TFRC;CR1L
cGMP-PKG signaling pathway	4/167	0.939145	0.0272672	0.999993	0	0	0.531688	0.033382	GNA12;GNAI3;ATP2A2;MEF2D
Estrogen signaling pathway	3/137	0.943439	0.0252861	0.999993	0	0	0.485254	0.0282531	HSP90AB1;SHC1;GNAI3
Protein digestion and absorption	2/103	0.944447	0.0248223	0.999993	0	0	0.429457	0.0245458	COL27A1;COL5A1
Inflammatory bowel disease	1965-01-01	0.946399	0.0239257	0.999993	0	0	0.339141	0.0186836	TLR5
Measles	3/139	0.947035	0.0236341	0.999993	0	0	0.478067	0.0260162	CHUK;BAX;IKBKG
Long-term potentiation	1967-01-01	0.951022	0.0218096	0.999993	0	0	0.328829	0.0165133	BRAF
Drug metabolism	2/108	0.953893	0.0205001	0.999993	0	0	0.409092	0.0193105	UCK2;TK1
Renin secretion	1969-01-01	0.955246	0.0198848	0.999993	0	0	0.319124	0.0146115	GNAI3
Prolactin signaling pathway	1970-01-01	0.95722	0.0189884	0.999993	0	0	0.314483	0.0137499	SHC1
Serotonergic synapse	2/113	0.961792	0.0169187	0.999993	0	0	0.390562	0.015215	GNAI3;BRAF
Alcoholism	4/186	0.96584	0.0150947	0.999993	0	0	0.475705	0.016534	HDAC3;SHC1;GNAI3;BRAF
Thyroid hormone synthesis	1975-01-01	0.965858	0.0150868	0.999993	0	0	0.293157	0.0101839	CANX
Gastric acid secretion	1976-01-01	0.967364	0.0144101	0.999993	0	0	0.289233	0.00959692	GNAI3
Pertussis	1976-01-01	0.967364	0.0144101	0.999993	0	0	0.289233	0.00959692	GNAI3
Arrhythmogenic right ventricular cardiomyopathy	1977-01-01	0.968804	0.0137643	0.999993	0	0	0.285412	0.00904568	ATP2A2
Leishmaniasis	1977-01-01	0.968804	0.0137643	0.999993	0	0	0.285412	0.00904568	CR1L
Platelet activation	2/124	0.974854	0.0110605	0.999993	0	0	0.355141	0.00904468	ARHGEF12;GNAI3
Lysosome	2/128	0.978435	0.00946796	0.999993	0	0	0.343795	0.00749499	CD63;GAA
ECM-receptor interaction	1988-01-01	0.981011	0.00832624	0.999993	0	0	0.249182	0.00477728	AGRN
Dopaminergic synapse	2/132	0.98152	0.00810072	0.999993	0	0	0.333146	0.00621405	GNAI3;PPP2R5A
GABAergic synapse	1989-01-01	0.981849	0.00795534	0.999993	0	0	0.246337	0.00451237	GNAI3
Calcium signaling pathway	5/240	0.981979	0.00789775	0.999993	0	0	0.459759	0.00836084	SPHK1;PHKG2;VEGFB;ATP2A2;PLCG1
Bile secretion	1990-01-01	0.98265	0.0076011	0.999993	0	0	0.243557	0.00426277	ABCG2
Morphine addiction	1991-01-01	0.983416	0.00726275	0.999993	0	0	0.240838	0.00402755	GNAI3
Systemic lupus erythematosus	2/135	0.983549	0.00720419	0.999993	0	0	0.32558	0.00540081	SSB;SNRPB
GnRH signaling pathway	1993-01-01	0.984848	0.00663085	0.999993	0	0	0.235577	0.00359682	MAPK7
TGF-beta signaling pathway	1994-01-01	0.985517	0.00633597	0.999993	0	0	0.233032	0.00339973	RPS6KB1
cAMP signaling pathway	4/216	0.986918	0.00571896	0.999993	0	0	0.407741	0.0053693	GNAI3;ATP2A2;BRAF;RAC1
Inflammatory mediator regulation of TRP channels	1998-01-01	0.98791	0.00528252	0.999993	0	0	0.223376	0.00271702	PLCG1
Amoebiasis	1/102	0.989908	0.00440499	0.999993	0	0	0.214484	0.00217548	PTK2
Cholinergic synapse	1/113	0.99386	0.0026746	0.999993	0	0	0.193307	0.00119048	GNAI3
Glutamatergic synapse	1/114	0.994132	0.00255609	0.999993	0	0	0.191586	0.0011276	GNAI3
Chemical carcinogenesis	3/239	0.998505	0.000649633	0.999993	0	0	0.274045	0.000409927	HSP90AB1;RPS6KB1;GNAI3
Cell adhesion molecules	1/148	0.998738	0.000548562	0.999993	0	0	0.14701	0.00018569	CD99L2
JAK-STAT signaling pathway	1/162	0.999329	0.00029145	0.999993	0	0	0.134128	9.00114e-05	STAM
Herpes simplex virus 1 infection	9/498	0.999548	0.00019632	0.999993	0	0	0.394161	0.000178178	DAXX;CHUK;BAX;TSC1;IKBKG;SRSF5;ZFP37;SRSF7;BIRC2
Neuroactive ligand-receptor interaction	2/341	0.999993	3.074e-06	0.999993	0	0	0.126349	8.94318e-07	CHRNB1;TSPO

## Sheet: MXE
Term	Overlap	P-value		Adjusted P-value	Old P-value	Old Adjusted P-value	Odds Ratio	Combined Score	Genes
Salmonella infection	18/249	0.00353782	2.45126	0.520136	0	0	2.14612	12.1132	DYNC2H1;DCTN6;HSP90AB1;ANXA2;ROCK2;CDC42;DYNC1LI2;MAPK8;IRAK1;ABI1;FLNA;SNX9;DYNLRB1;RAF1;GAPDH;VPS39;EXOC2;ARL8A
Circadian rhythm	2023-05-31	0.00438933	2.3576	0.520136	0	0	5.25477	28.526	BHLHE41;CSNK1D;FBXL3;BTRC;CLOCK
Mitophagy	1968-07-01	0.0102549	1.98907	0.613604	0	0	3.13884	14.3759	BNIP3L;BCL2L13;MAPK8;CSNK2A1;CSNK2A2;NBR1;ATG5
Focal adhesion	14/201	0.012784	1.89333	0.613604	0	0	2.05484	8.95822	SHC1;ROCK2;FN1;PTK2;PPP1CB;CDC42;PPP1CC;MAPK8;PDGFC;RAPGEF1;FLNA;RAF1;MET;PPP1R12C
Hedgehog signaling pathway	1956-06-01	0.0141124	1.8504	0.613604	0	0	3.27955	13.9732	CUL3;SPOPL;CSNK1D;BTRC;MEGF8;GLI2
Wnt signaling pathway	12/166	0.0155343	1.80871	0.613604	0	0	2.13627	8.89694	TLE4;MAPK8;TLE1;CSNK2A1;APC;TBL1XR1;ROCK2;RYK;CSNK2A2;FZD6;NFATC3;BTRC
Regulation of actin cytoskeleton	14/218	0.0240576	1.61875	0.813874	0	0	1.88193	7.01453	ROCK2;LPAR1;FN1;BAIAP2;PTK2;SSH1;PPP1CB;CDC42;PPP1CC;APC;PDGFC;RAF1;PPP1R12C;FGFR2
Ubiquitin mediated proteolysis	10/140	0.0277396	1.5569	0.813874	0	0	2.10549	7.54798	UBE2F;PPIL2;UBE3C;CUL5;CUL3;UBA3;CBLB;UBA1;TRIP12;BTRC
Proteoglycans in cancer	13/205	0.0316461	1.49968	0.813874	0	0	1.85523	6.40636	ROCK2;FZD6;FN1;PTK2;PPP1CB;CDC42;PPP1CC;FLNA;RAF1;MET;PPP1R12C;CD44;EIF4B
Renal cell carcinoma	1969-06-01	0.0355602	1.44904	0.813874	0	0	2.60106	8.67849	CDC42;EGLN1;RAPGEF1;ARNT;RAF1;MET
Central carbon metabolism in cancer	1970-06-01	0.0377747	1.4228	0.813874	0	0	2.56028	8.38777	PKM;RAF1;MET;FGFR2;GLS;PDK1
Sulfur metabolism	2023-02-10	0.0468787	1.32902	0.908078	0	0	6.80862	20.8357	SELENBP1;BPNT1
Ribosome	10/158	0.0555141	1.2556	0.908078	0	0	1.84768	5.34187	RPL4;RPS14;RPS19;RPL23;RPL27A;RPS20;RPS2;RPL18;MRPS18C;MRPL33
MAPK signaling pathway	16/294	0.0607139	1.21671	0.908078	0	0	1.57668	4.4172	ATF2;DUSP5;IL1R1;MAX;NFATC3;ECSIT;MAPK8IP3;CDC42;MAPK8;IRAK1;PDGFC;FLNA;RAF1;MET;FGFR2;MAP4K4
Neurotrophin signaling pathway	8/119	0.0615795	1.21056	0.908078	0	0	1.96905	5.48857	CDC42;MAPK8;IRAK1;SHC1;KIDINS220;ABL1;RAPGEF1;RAF1
Hippo signaling pathway	10/163	0.0656511	1.18276	0.908078	0	0	1.78683	4.86627	PPP1CB;PPP1CC;FRMD6;APC;FZD6;PPP2R2D;CSNK1D;BTRC;LIMD1;GLI2
Longevity regulating pathway	7/102	0.0709102	1.14929	0.908078	0	0	2.0119	5.32418	ATF2;STK11;RB1CC1;AKT1S1;EHMT1;ATG5;APPL1
Transcriptional misregulation in cancer	11/192	0.0812189	1.09034	0.908078	0	0	1.6614	4.17113	CCNA2;CCNT2;NCOR1;EYA1;MAX;HMGA2;TCF3;MET;PTK2;RUNX1;KDM6A
ErbB signaling pathway	1985-06-01	0.0815923	1.08835	0.908078	0	0	2.07253	5.19381	MAPK8;SHC1;ABL1;CBLB;RAF1;PTK2
Protein processing in endoplasmic reticulum	10/171	0.0841952	1.07471	0.908078	0	0	1.69734	4.20026	NSFL1C;MAPK8;HSP90AB1;SAR1A;TUSC3;DNAJC5;BAG1;CANX;EIF2AK4;NFE2L2
Other types of O-glycan biosynthesis	1947-04-01	0.0847564	1.07183	0.908078	0	0	2.536	6.25879	ST6GAL1;B4GALT1;B3GLCT;GALNT10
Citrate cycle (TCA cycle)	2023-03-30	0.089139	1.04993	0.908078	0	0	3.02735	7.31878	IDH3B;OGDH;SUCLG2
Pathogenic Escherichia coli infection	11/197	0.0931569	1.03079	0.908078	0	0	1.61632	3.83628	CDC42;MAPK8;IRAK1;IL1R1;ROCK2;ABI1;LPAR1;ABL1;TMBIM6;BAIAP2;GAPDH
Dopaminergic synapse	8/132	0.0981824	1.00797	0.908078	0	0	1.76142	4.08813	PPP1CB;ATF2;PPP1CC;MAPK8;PPP2R5E;PPP2R2D;COMT;CLOCK
N-Glycan biosynthesis	1950-04-01	0.10094	0.995938	0.908078	0	0	2.37024	5.43551	ST6GAL1;B4GALT1;TUSC3;MGAT1
Adherens junction	1971-05-01	0.107566	0.968325	0.908078	0	0	2.06576	4.60593	CDC42;CSNK2A1;CSNK2A2;BAIAP2;MET
Axon guidance	10/182	0.114411	0.941534	0.908078	0	0	1.58787	3.44245	CDC42;ROCK2;RYK;TRPC1;ABL1;NFATC3;RAF1;MET;PTK2;SSH1
Autophagy	8/137	0.114947	0.939504	0.908078	0	0	1.69271	3.66181	RUBCN;STK11;MAPK8;RB1CC1;AKT1S1;EIF2AK4;RAF1;ATG5
Insulin signaling pathway	8/137	0.114947	0.939504	0.908078	0	0	1.69271	3.66181	PPP1CB;PPP1CC;MAPK8;SHC1;RAPGEF1;FLOT2;CBLB;RAF1
Yersinia infection	8/137	0.114947	0.939504	0.908078	0	0	1.69271	3.66181	CDC42;MAPK8;IRAK1;ROCK2;FN1;NFATC3;BAIAP2;PTK2
Bacterial invasion of epithelial cells	1977-05-01	0.138235	0.859382	0.999992	0	0	1.89303	3.74592	CDC42;SHC1;FN1;MET;PTK2
Legionellosis	1957-04-01	0.143606	0.842827	0.999992	0	0	2.05644	3.9909	EEF1G;CLK1;BCL2L13;SAR1A
Various types of N-glycan biosynthesis	1939-03-01	0.159886	0.79619	0.999992	0	0	2.26945	4.16057	B4GALT1;TUSC3;MGAT1
D-Glutamine and D-glutamate metabolism	2023-01-05	0.165352	0.781591	0.999992	0	0	6.80042	12.2386	GLS
mTOR signaling pathway	8/154	0.182285	0.739249	0.999992	0	0	1.49428	2.54354	STK11;SEH1L;MAPKAP1;FZD6;AKT1S1;RAF1;FNIP2;EIF4B
FoxO signaling pathway	7/131	0.18477	0.733367	0.999992	0	0	1.53905	2.5989	PLK4;STK11;MAPK8;CCNG2;HOMER3;SGK3;RAF1
Lysine degradation	1963-04-01	0.184819	0.733253	0.999992	0	0	1.84674	3.11799	NSD1;EHMT1;PLOD2;KMT5B
Pathways in cancer	23/531	0.190226	0.72073	0.999992	0	0	1.2378	2.05417	JAG2;EGLN1;HSP90AB1;MAX;ROCK2;FZD6;FN1;LPAR1;ARNT;PTK2;GLI2;RUNX1;EML4;CDC42;CCNA2;MAPK8;APC;ABL1;RAF1;MET;FGFR2;APPL1;NFE2L2
HIF-1 signaling pathway	6/109	0.19121	0.71849	0.999992	0	0	1.58763	2.62654	EGLN1;PGK1;ARNT;ENO1;GAPDH;PDK1
Mannose type O-glycan biosynthesis	2023-02-23	0.195848	0.708081	0.999992	0	0	2.59201	4.22606	B3GALNT2;B4GALT1
Vasopressin-regulated water reabsorption	1944-03-01	0.204655	0.688977	0.999992	0	0	1.99217	3.16043	DCTN6;DYNC2H1;DYNC1LI2
PD-L1 expression and PD-1 checkpoint pathway in cancer	1989-05-01	0.209141	0.679562	0.999992	0	0	1.62158	2.53737	EML4;CSNK2A1;CSNK2A2;NFATC3;RAF1
Glycolysis / Gluconeogenesis	1967-04-01	0.21418	0.669221	0.999992	0	0	1.72912	2.66448	PKM;PGK1;ENO1;GAPDH
Biosynthesis of unsaturated fatty acids	2023-02-27	0.248638	0.604432	0.999992	0	0	2.17684	3.02962	ACOX1;TECR
Ether lipid metabolism	1949-03-01	0.251844	0.598868	0.999992	0	0	1.77517	2.44786	GDPD3;PAFAH1B3;PAFAH1B2
Tight junction	8/169	0.252809	0.597207	0.999992	0	0	1.354	1.86192	CDC42;STK11;MYL6;MAPK8;ROCK2;PPP2R2D;ARHGAP17;RUNX1
AMPK signaling pathway	6/120	0.254071	0.595046	0.999992	0	0	1.43361	1.96425	CCNA2;STK11;PPP2R5E;AKT1S1;PPP2R2D;ELAVL1
Shigellosis	11/246	0.259263	0.58626	0.999992	0	0	1.27602	1.72251	CDC42;MAPK8;IL1R1;CBX3;ROCK2;AKT1S1;U2AF1;BTRC;PTK2;CD44;ATG5
Phosphatidylinositol signaling system	1997-05-01	0.261734	0.582139	0.999992	0	0	1.47996	1.98377	MTMR2;PIP4P2;DGKD;PPIP5K2;DGKH
Choline metabolism in cancer	1998-05-01	0.268522	0.57102	0.999992	0	0	1.46397	1.92486	MAPK8;DGKD;PDGFC;RAF1;DGKH
Glycerophospholipid metabolism	1998-05-01	0.268522	0.57102	0.999992	0	0	1.46397	1.92486	PGS1;DGKD;LPGAT1;ETNK1;DGKH
PI3K-Akt signaling pathway	15/354	0.277627	0.556539	0.999992	0	0	1.20653	1.54614	ATF2;HSP90AB1;LPAR1;FN1;OSMR;PTK2;STK11;PPP2R5E;PDGFC;PPP2R2D;SGK3;RAF1;MET;FGFR2;EIF4B
Progesterone-mediated oocyte maturation	5/100	0.282209	0.54943	0.999992	0	0	1.433	1.8129	CCNA2;MAPK8;HSP90AB1;RAF1;MAD1L1
Chronic myeloid leukemia	1976-04-01	0.284081	0.546558	0.999992	0	0	1.51228	1.90319	SHC1;ABL1;RAF1;RUNX1
Adrenergic signaling in cardiomyocytes	7/150	0.284377	0.546105	0.999992	0	0	1.33324	1.67648	PPP1CB;ATF2;PPP1CC;PPP2R5E;TPM1;PPP2R2D;CREM
Galactose metabolism	1931-02-01	0.301807	0.520271	0.999992	0	0	1.87619	2.24762	B4GALT1;AKR1B10
Oxytocin signaling pathway	7/154	0.306894	0.513011	0.999992	0	0	1.29669	1.53172	PPP1CB;PPP1CC;MYL6;ROCK2;NFATC3;RAF1;PPP1R12C
T cell receptor signaling pathway	5/104	0.309953	0.508704	0.999992	0	0	1.37481	1.61037	CDC42;MAPK8;NFATC3;CBLB;RAF1
Coronavirus disease	10/232	0.31066	0.507714	0.999992	0	0	1.22703	1.43446	RPL4;RPS14;MAPK8;RPS19;IRAK1;RPL23;RPL27A;RPS20;RPS2;RPL18
Thermogenesis	10/232	0.31066	0.507714	0.999992	0	0	1.22703	1.43446	ATF2;COX19;KDM3A;KDM3B;NDUFA5;NDUFS6;COX18;COX4I1;AKT1S1;COX14
Ubiquinone and other terpenoid-quinone biosynthesis	2023-01-11	0.328137	0.483945	0.999992	0	0	2.71932	3.03021	COQ2
Fructose and mannose metabolism	1933-02-01	0.32819	0.483874	0.999992	0	0	1.75497	1.95532	AKR1B10;GMPPA
Th17 cell differentiation	5/107	0.331001	0.480171	0.999992	0	0	1.33417	1.4751	MAPK8;HSP90AB1;IL1R1;NFATC3;RUNX1
Vascular smooth muscle contraction	6/133	0.33421	0.475981	0.999992	0	0	1.28599	1.40943	PPP1CB;PPP1CC;MYL6;ROCK2;RAF1;PPP1R12C
Pentose and glucuronate interconversions	1934-02-01	0.341283	0.466885	0.999992	0	0	1.70004	1.82761	AKR1B10;RPE
Propanoate metabolism	1934-02-01	0.341283	0.466885	0.999992	0	0	1.70004	1.82761	ACOX1;SUCLG2
Notch signaling pathway	1959-03-01	0.349344	0.456747	0.999992	0	0	1.45742	1.53276	TLE4;JAG2;TLE1
VEGF signaling pathway	1959-03-01	0.349344	0.456747	0.999992	0	0	1.45742	1.53276	CDC42;RAF1;PTK2
Nicotinate and nicotinamide metabolism	1935-02-01	0.354295	0.450635	0.999992	0	0	1.64843	1.71046	NAMPT;NADK
Lipid and atherosclerosis	9/215	0.355049	0.449712	0.999992	0	0	1.1894	1.23162	CDC42;MAPK8;HSP90AB1;IRAK1;ROCK2;NFATC3;MIB2;PTK2;NFE2L2
Colorectal cancer	1986-04-01	0.36484	0.437897	0.999992	0	0	1.32716	1.33817	MAPK8;APC;RAF1;APPL1
Tyrosine metabolism	1936-02-01	0.367214	0.43508	0.999992	0	0	1.59987	1.60276	GSTZ1;COMT
Glycerolipid metabolism	1961-03-01	0.368859	0.433139	0.999992	0	0	1.40701	1.40327	DGKD;AKR1B10;DGKH
Fluid shear stress and atherosclerosis	6/139	0.372254	0.42916	0.999992	0	0	1.22759	1.21308	MAPK8;HSP90AB1;SUMO1;IL1R1;PTK2;NFE2L2
Measles	6/139	0.372254	0.42916	0.999992	0	0	1.22759	1.21308	MAPK8;CSNK2A1;IRAK1;CSNK2A2;CBLB;EIF2AK4
Gap junction	1988-04-01	0.381051	0.419017	0.999992	0	0	1.29543	1.24986	PDGFC;LPAR1;CSNK1D;RAF1
cGMP-PKG signaling pathway	7/167	0.381912	0.418037	0.999992	0	0	1.19052	1.14596	PPP1CB;ATF2;PPP1CC;ROCK2;NFATC3;RAF1;GTF2I
Hepatocellular carcinoma	7/168	0.38774	0.411459	0.999992	0	0	1.18307	1.12086	PBRM1;APC;SHC1;FZD6;RAF1;MET;NFE2L2
Basal cell carcinoma	1963-03-01	0.388267	0.410869	0.999992	0	0	1.35997	1.28662	APC;FZD6;GLI2
Endocytosis	10/252	0.405254	0.392273	0.999992	0	0	1.12444	1.01564	CDC42;SH3GLB2;RABEP1;BIN1;CBLB;VPS26A;ASAP2;SNX5;FGFR2;EPN1
Growth hormone synthesis, secretion and action	5/119	0.415818	0.381096	0.999992	0	0	1.19298	1.04685	ATF2;MAPK8;SHC1;RAF1;PTK2
Sphingolipid signaling pathway	5/119	0.415818	0.381096	0.999992	0	0	1.19298	1.04685	MAPK8;PPP2R5E;ROCK2;PPP2R2D;RAF1
Acute myeloid leukemia	1967-03-01	0.426601	0.369978	0.999992	0	0	1.27471	1.08593	CCNA2;RAF1;RUNX1
Long-term potentiation	1967-03-01	0.426601	0.369978	0.999992	0	0	1.27471	1.08593	PPP1CB;PPP1CC;RAF1
Phospholipase D signaling pathway	6/148	0.429447	0.367091	0.999992	0	0	1.14925	0.971411	DGKD;SHC1;PDGFC;LPAR1;RAF1;DGKH
Diabetic cardiomyopathy	8/203	0.432698	0.363815	0.999992	0	0	1.11593	0.934834	PPP1CB;PPP1CC;COL3A1;MAPK8;NDUFA5;NDUFS6;COX4I1;GAPDH
Gastric cancer	6/149	0.435767	0.360746	0.999992	0	0	1.14115	0.947895	APC;SHC1;FZD6;RAF1;MET;FGFR2
Ras signaling pathway	9/232	0.441105	0.355458	0.999992	0	0	1.09775	0.898476	CDC42;MAPK8;SHC1;PDGFC;ABL1;RAF1;MET;EXOC2;FGFR2
Spliceosome	6/150	0.442075	0.354504	0.999992	0	0	1.13317	0.924978	PRPF38B;SRSF2;U2AF1;TXNL4A;HNRNPA1;SRSF7
Amphetamine addiction	1969-03-01	0.445454	0.351197	0.999992	0	0	1.23595	0.999465	PPP1CB;ATF2;PPP1CC
Fc gamma R-mediated phagocytosis	1997-04-01	0.453083	0.343822	0.999992	0	0	1.16951	0.925882	CDC42;BIN1;ASAP2;RAF1
Prostate cancer	1997-04-01	0.453083	0.343822	0.999992	0	0	1.16951	0.925882	HSP90AB1;PDGFC;RAF1;FGFR2
Epithelial cell signaling in Helicobacter pylori infection	1970-03-01	0.454789	0.34219	0.999992	0	0	1.21744	0.959249	CDC42;MAPK8;MET
Prolactin signaling pathway	1970-03-01	0.454789	0.34219	0.999992	0	0	1.21744	0.959249	MAPK8;SHC1;RAF1
Inflammatory mediator regulation of TRP channels	1998-04-01	0.460937	0.336359	0.999992	0	0	1.15701	0.896101	PPP1CB;PPP1CC;MAPK8;IL1R1
mRNA surveillance pathway	1998-04-01	0.460937	0.336359	0.999992	0	0	1.15701	0.896101	PPP1CB;PPP1CC;PPP2R5E;PPP2R2D
Melanoma	1972-03-01	0.473256	0.324904	0.999992	0	0	1.18203	0.8843	PDGFC;RAF1;MET
Non-small cell lung cancer	1972-03-01	0.473256	0.324904	0.999992	0	0	1.18203	0.8843	EML4;RAF1;MET
AGE-RAGE signaling pathway in diabetic complications	4/100	0.476523	0.321916	0.999992	0	0	1.13279	0.839668	CDC42;MAPK8;COL3A1;FN1
Basal transcription factors	1945-02-01	0.477959	0.320609	0.999992	0	0	1.26442	0.933432	GTF2H1;GTF2I
Cellular senescence	6/156	0.479582	0.319138	0.999992	0	0	1.0875	0.79914	PPP1CB;CCNA2;PPP1CC;NFATC3;BTRC;RAF1
p53 signaling pathway	1973-03-01	0.482381	0.31661	0.999992	0	0	1.16508	0.84937	RRM2B;CCNG2;MDM4
Oocyte meiosis	5/129	0.48522	0.314062	0.999992	0	0	1.0962	0.792723	PPP1CB;PPP1CC;PPP2R5E;BTRC;MAD1L1
Relaxin signaling pathway	5/129	0.48522	0.314062	0.999992	0	0	1.0962	0.792723	ATF2;MAPK8;COL3A1;SHC1;RAF1
Type II diabetes mellitus	1946-02-01	0.489535	0.310217	0.999992	0	0	1.23562	0.882603	MAPK8;PKM
Amoebiasis	4/102	0.491935	0.308092	0.999992	0	0	1.10956	0.78713	COL3A1;IL1R1;FN1;PTK2
C-type lectin receptor signaling pathway	4/104	0.507154	0.29486	0.999992	0	0	1.08725	0.738179	MAPK8;NFATC3;CBLB;RAF1
NF-kappa B signaling pathway	4/104	0.507154	0.29486	0.999992	0	0	1.08725	0.738179	CSNK2A1;IRAK1;IL1R1;CSNK2A2
Pancreatic cancer	1976-03-01	0.509292	0.293033	0.999992	0	0	1.11703	0.753697	CDC42;MAPK8;RAF1
Amino sugar and nucleotide sugar metabolism	1948-02-01	0.512194	0.290565	0.999992	0	0	1.18177	0.790667	CYB5R1;GMPPA
One carbon pool by folate	2023-01-20	0.514831	0.288336	0.999992	0	0	1.43055	0.94977	MTHFD2L
Hepatitis B	6/162	0.516301	0.287097	0.999992	0	0	1.04535	0.691041	CCNA2;ATF2;MAPK8;IRAK1;NFATC3;RAF1
Human T-cell leukemia virus 1 infection	8/219	0.517743	0.285886	0.999992	0	0	1.03045	0.67832	CCNA2;ATF2;MAPK8;IL1R1;CANX;NFATC3;TCF3;MAD1L1
Parathyroid hormone synthesis, secretion and action	4/106	0.522166	0.282191	0.999992	0	0	1.06582	0.692539	ATF2;AKAP13;NACA;RAF1
Arginine and proline metabolism	1950-02-01	0.534181	0.272311	0.999992	0	0	1.13242	0.710047	P4HA1;P4HA2
RNA degradation	1979-03-01	0.535451	0.271281	0.999992	0	0	1.07277	0.670101	PAN3;CNOT2;ENO1
Arginine biosynthesis	2023-01-22	0.5487	0.260665	0.999992	0	0	1.29418	0.776769	GLS
Peroxisome	1982-03-01	0.560799	0.251193	0.999992	0	0	1.03187	0.596826	PEX7;ACOX1;HACL1
Proximal tubule bicarbonate reclamation	2023-01-23	0.564739	0.248152	0.999992	0	0	1.23529	0.705832	GLS
Glycosaminoglycan biosynthesis	1953-02-01	0.565866	0.247287	0.999992	0	0	1.06564	0.606772	B4GALT1;EXTL3
Fanconi anemia pathway	1954-02-01	0.576077	0.23952	0.999992	0	0	1.04509	0.576382	EME2;REV1
Signaling pathways regulating pluripotency of stem cells	5/143	0.576848	0.238939	0.999992	0	0	0.984274	0.541524	APC;FZD6;TCF3;RAF1;FGFR2
Viral carcinogenesis	7/203	0.584613	0.233131	0.999992	0	0	0.970026	0.520715	CCNA2;CDC42;ATF2;PKM;GTF2H1;CHD4;MAD1L1
alpha-Linolenic acid metabolism	2023-01-25	0.595129	0.225389	0.999992	0	0	1.13223	0.587601	ACOX1
Pyrimidine metabolism	1956-02-01	0.595968	0.224777	0.999992	0	0	1.00628	0.520818	RRM2B;NUDT2
Cardiac muscle contraction	1987-03-01	0.601129	0.221033	0.999992	0	0	0.970196	0.493778	ASPH;COX4I1;TPM1
Breast cancer	5/147	0.601409	0.22083	0.999992	0	0	0.956348	0.486285	JAG2;APC;SHC1;FZD6;RAF1
Folate biosynthesis	2023-01-26	0.60952	0.215012	0.999992	0	0	1.08688	0.538098	AKR1B10
Endometrial cancer	1958-02-01	0.615151	0.211018	0.999992	0	0	0.970238	0.471427	APC;RAF1
Rap1 signaling pathway	7/210	0.620352	0.207362	0.999992	0	0	0.936234	0.447023	CDC42;PDGFC;LPAR1;RAPGEF1;RAF1;MET;FGFR2
Fatty acid elongation	2023-01-27	0.6234	0.205233	0.999992	0	0	1.04503	0.493845	TECR
Human immunodeficiency virus 1 infection	7/212	0.630248	0.200489	0.999992	0	0	0.927003	0.427944	MAPK8;CUL5;IRAK1;NFATC3;BTRC;RAF1;PTK2
Human papillomavirus infection	11/331	0.631129	0.199882	0.999992	0	0	0.932895	0.42936	CCNA2;CDC42;PKM;APC;PPP2R5E;FZD6;PPP2R2D;FN1;CHD4;RAF1;PTK2
Mineral absorption	1960-02-01	0.633628	0.198166	0.999992	0	0	0.936684	0.427403	TRPM6;ATOX1
Small cell lung cancer	1992-03-01	0.638944	0.194537	0.999992	0	0	0.915452	0.410066	MAX;FN1;PTK2
Th1 and Th2 cell differentiation	1992-03-01	0.638944	0.194537	0.999992	0	0	0.915452	0.410066	JAG2;MAPK8;NFATC3
Cell cycle	4/124	0.64607	0.18972	0.999992	0	0	0.905099	0.39539	CCNA2;TFDP2;ABL1;MAD1L1
Platelet activation	4/124	0.64607	0.18972	0.999992	0	0	0.905099	0.39539	PPP1CB;PPP1CC;COL3A1;ROCK2
GnRH signaling pathway	1993-03-01	0.646198	0.189634	0.999992	0	0	0.905233	0.39527	CDC42;MAPK8;RAF1
Non-alcoholic fatty liver disease	5/155	0.648008	0.18842	0.999992	0	0	0.904965	0.392621	CDC42;MAPK8;NDUFA5;NDUFS6;COX4I1
IL-17 signaling pathway	1994-03-01	0.653348	0.184855	0.999992	0	0	0.895239	0.381054	MAPK8;HSP90AB1;ELAVL1
Pentose phosphate pathway	2023-01-30	0.662153	0.179042	0.999992	0	0	0.936774	0.386193	RPE
beta-Alanine metabolism	2023-01-30	0.662153	0.179042	0.999992	0	0	0.936774	0.386193	ACOX1
MicroRNAs in cancer	10/310	0.665664	0.176745	0.999992	0	0	0.904286	0.368017	APC;SHC1;TPM1;ABL1;HMGA2;MDM4;RAF1;MET;CD44;GLS
GnRH secretion	1964-02-01	0.668487	0.174907	0.999992	0	0	0.876071	0.352828	TRPC1;RAF1
Purine metabolism	4/129	0.67646	0.169758	0.999992	0	0	0.868669	0.339546	PKM;RRM2B;NUDT2;PDE7A
Aminoacyl-tRNA biosynthesis	1966-02-01	0.684886	0.164382	0.999992	0	0	0.848605	0.321199	AARS2;NARS2
Human cytomegalovirus infection	7/225	0.690874	0.160601	0.999992	0	0	0.871129	0.322141	ATF2;AKAP13;IL1R1;ROCK2;NFATC3;RAF1;PTK2
Base excision repair	1933-01-01	0.696923	0.156815	0.999992	0	0	0.848819	0.306491	APEX2
SNARE interactions in vesicular transport	1933-01-01	0.696923	0.156815	0.999992	0	0	0.848819	0.306491	BNIP1
Fc epsilon RI signaling pathway	1968-02-01	0.700615	0.154521	0.999992	0	0	0.822804	0.292752	MAPK8;RAF1
Chagas disease	3/102	0.706806	0.150699	0.999992	0	0	0.822554	0.285425	MAPK8;IRAK1;PPP2R2D
Adipocytokine signaling pathway	1969-02-01	0.708231	0.149825	0.999992	0	0	0.810481	0.279604	STK11;MAPK8
Protein digestion and absorption	3/103	0.713024	0.146896	0.999992	0	0	0.814286	0.275425	COL3A1;COL5A1;COL12A1
RIG-I-like receptor signaling pathway	1970-02-01	0.715685	0.145278	0.999992	0	0	0.798521	0.267117	MAPK8;ATG5
Estrogen signaling pathway	4/137	0.721212	0.141937	0.999992	0	0	0.816077	0.266712	ATF2;HSP90AB1;SHC1;RAF1
Mucin type O-glycan biosynthesis	1936-01-01	0.72812	0.137797	0.999992	0	0	0.775942	0.246198	GALNT10
Glucagon signaling pathway	3/107	0.736876	0.132606	0.999992	0	0	0.782804	0.239018	ATF2;PKM;PPP4R3A
Alanine, aspartate and glutamate metabolism	1937-01-01	0.737789	0.132068	0.999992	0	0	0.754349	0.229396	GLS
Insulin resistance	3/108	0.742588	0.129252	0.999992	0	0	0.775308	0.230743	PPP1CB;PPP1CC;MAPK8
Glioma	1975-02-01	0.750588	0.124598	0.999992	0	0	0.743634	0.213348	SHC1;RAF1
Thyroid hormone synthesis	1975-02-01	0.750588	0.124598	0.999992	0	0	0.743634	0.213348	ATF2;CANX
Spinocerebellar ataxia	4/143	0.751652	0.123983	0.999992	0	0	0.780606	0.222848	MAPK8;RB1CC1;PUM1;PUM2
Pertussis	1976-02-01	0.757109	0.120841	0.999992	0	0	0.733547	0.204108	MAPK8;IRAK1
Alzheimer disease	11/369	0.763877	0.116977	0.999992	0	0	0.832202	0.224153	MAPK8;CSNK2A1;NDUFA5;APC;NDUFS6;COX4I1;RB1CC1;CSNK2A2;FZD6;RAF1;GAPDH
Antigen processing and presentation	1978-02-01	0.769711	0.113672	0.999992	0	0	0.714169	0.186927	HSP90AB1;CANX
Synaptic vesicle cycle	1978-02-01	0.769711	0.113672	0.999992	0	0	0.714169	0.186927	NAPA;UNC13A
Bladder cancer	1941-01-01	0.773151	0.111736	0.999992	0	0	0.678773	0.174635	RAF1
Ferroptosis	1941-01-01	0.773151	0.111736	0.999992	0	0	0.678773	0.174635	ATG5
Homologous recombination	1941-01-01	0.773151	0.111736	0.999992	0	0	0.678773	0.174635	RAD54B
NOD-like receptor signaling pathway	5/181	0.774168	0.111165	0.999992	0	0	0.770229	0.197153	MAPK8;HSP90AB1;NAMPT;ERBIN;ATG5
Glutamatergic synapse	3/114	0.774807	0.110807	0.999992	0	0	0.73317	0.187062	TRPC1;HOMER3;GLS
Leukocyte transendothelial migration	3/114	0.774807	0.110807	0.999992	0	0	0.73317	0.187062	CDC42;ROCK2;PTK2
cAMP signaling pathway	6/216	0.782881	0.106304	0.999992	0	0	0.774351	0.189541	PPP1CB;PPP1CC;MAPK8;ACOX1;ROCK2;RAF1
Parkinson disease	7/249	0.78482	0.10523	0.999992	0	0	0.783749	0.189903	MAPK8;NDUFA5;NDUFS6;COX4I1;UBA1;PARK7;NFE2L2
B cell receptor signaling pathway	1981-02-01	0.787544	0.103725	0.999992	0	0	0.686941	0.164066	NFATC3;RAF1
Fatty acid degradation	1943-01-01	0.789003	0.102921	0.999992	0	0	0.646383	0.153183	ACOX1
Alcoholism	5/186	0.793952	0.100206	0.999992	0	0	0.748756	0.172762	PPP1CB;ATF2;PPP1CC;SHC1;RAF1
RNA transport	5/186	0.793952	0.100206	0.999992	0	0	0.748756	0.172762	EIF4A2;SEH1L;SUMO1;ELAC1;EIF4B
Glycosphingolipid biosynthesis	1945-01-01	0.80375	0.0948792	0.999992	0	0	0.616938	0.134781	B4GALT1
Cushing syndrome	4/155	0.804772	0.0943269	0.999992	0	0	0.718121	0.155973	ATF2;APC;FZD6;ARNT
Insulin secretion	1986-02-01	0.814571	0.0890711	0.999992	0	0	0.645884	0.132467	RIMS2;ATF2
Chemokine signaling pathway	5/192	0.815872	0.088378	0.999992	0	0	0.724504	0.147435	CDC42;SHC1;ROCK2;RAF1;PTK2
Nucleotide excision repair	1947-01-01	0.817467	0.08753	0.999992	0	0	0.590053	0.118922	GTF2H1
Pyruvate metabolism	1947-01-01	0.817467	0.08753	0.999992	0	0	0.590053	0.118922	PKM
Valine, leucine and isoleucine degradation	1948-01-01	0.823962	0.0840929	0.999992	0	0	0.577469	0.111816	AUH
ECM-receptor interaction	1988-02-01	0.824493	0.083813	0.999992	0	0	0.630798	0.121735	FN1;CD44
Cocaine addiction	1949-01-01	0.830226	0.0808036	0.999992	0	0	0.565409	0.105198	ATF2
Malaria	1950-01-01	0.836268	0.0776546	0.999992	0	0	0.553841	0.0990303	MET
Oxidative phosphorylation	3/133	0.855574	0.0677426	0.999992	0	0	0.625394	0.0975509	NDUFA5;NDUFS6;COX4I1
Prion disease	7/273	0.855672	0.0676927	0.999992	0	0	0.712136	0.110999	ATF2;MAPK8;CSNK2A1;NDUFA5;NDUFS6;COX4I1;CSNK2A2
Pathways of neurodegeneration	13/475	0.86551	0.0627277	0.999992	0	0	0.760104	0.109786	DCTN6;CSNK2A1;NDUFA5;COX4I1;CSNK2A2;FZD6;PARK7;MAPK8;APC;NDUFS6;RB1CC1;UBA1;RAF1
Hematopoietic cell lineage	1999-02-01	0.870982	0.0599911	0.999992	0	0	0.558943	0.0772094	IL1R1;CD44
Glutathione metabolism	1957-01-01	0.872956	0.0590076	0.999992	0	0	0.484435	0.0658201	RRM2B
Melanogenesis	2/101	0.878109	0.0564514	0.999992	0	0	0.547595	0.0711786	FZD6;RAF1
Apoptosis	3/142	0.884101	0.053498	0.999992	0	0	0.584626	0.0720165	DFFB;MAPK8;RAF1
Long-term depression	1960-01-01	0.886048	0.0525427	0.999992	0	0	0.459731	0.0556201	RAF1
Viral myocarditis	1960-01-01	0.886048	0.0525427	0.999992	0	0	0.459731	0.0556201	ABL1
Toll-like receptor signaling pathway	2/104	0.888122	0.0515274	0.999992	0	0	0.531406	0.0630493	MAPK8;IRAK1
Steroid hormone biosynthesis	1961-01-01	0.890105	0.0505585	0.999992	0	0	0.452045	0.052625	COMT
Retrograde endocannabinoid signaling	3/148	0.900219	0.045652	0.999992	0	0	0.560259	0.0588932	MAPK8;NDUFA5;NDUFS6
Ribosome biogenesis in eukaryotes	2/108	0.900288	0.0456187	0.999992	0	0	0.511246	0.0537017	CSNK2A1;CSNK2A2
Cortisol synthesis and secretion	1965-01-01	0.904943	0.0433789	0.999992	0	0	0.423704	0.0423211	ATF2
Phagosome	3/152	0.909812	0.0410484	0.999992	0	0	0.545105	0.0515219	DYNC2H1;DYNC1LI2;CANX
TNF signaling pathway	2/112	0.911211	0.040381	0.999992	0	0	0.492553	0.0457979	ATF2;MAPK8
Toxoplasmosis	2/112	0.911211	0.040381	0.999992	0	0	0.492553	0.0457979	MAPK8;IRAK1
Serotonergic synapse	2/113	0.913761	0.0391673	0.999992	0	0	0.48809	0.0440189	TRPC1;RAF1
Hepatitis C	3/157	0.920624	0.0359176	0.999992	0	0	0.527269	0.0436069	PPP2R2D;EIF2AK4;RAF1
Inositol phosphate metabolism	1973-01-01	0.928884	0.0320385	0.999992	0	0	0.376469	0.0277726	MTMR2
Epstein-Barr virus infection	4/202	0.9312	0.0309569	0.999992	0	0	0.546313	0.0389417	CCNA2;MAPK8;IRAK1;CD44
PPAR signaling pathway	1974-01-01	0.931418	0.0308554	0.999992	0	0	0.371293	0.0263793	ACOX1
Thyroid hormone signaling pathway	2/121	0.93182	0.0306678	0.999992	0	0	0.455087	0.0321361	NCOR1;RAF1
Leishmaniasis	1977-01-01	0.938491	0.0275699	0.999992	0	0	0.356581	0.0226365	IRAK1
Osteoclast differentiation	2/127	0.942951	0.0255108	0.999992	0	0	0.433107	0.025441	MAPK8;IL1R1
Amyotrophic lateral sclerosis	8/364	0.948328	0.0230415	0.999992	0	0	0.606101	0.0321568	DCTN6;SEH1L;NDUFA5;NDUFS6;COX4I1;RB1CC1;HNRNPA1;SRSF7
Natural killer cell mediated cytotoxicity	2/131	0.949388	0.0225564	0.999992	0	0	0.41959	0.0217927	SHC1;RAF1
Tuberculosis	3/180	0.956649	0.0192474	0.999992	0	0	0.458202	0.020307	MAPK8;IRAK1;RAF1
GABAergic synapse	1989-01-01	0.96021	0.017634	0.999992	0	0	0.307764	0.0124964	GLS
Hypertrophic cardiomyopathy	1990-01-01	0.961628	0.0169928	0.999992	0	0	0.30429	0.011906	TPM1
Huntington disease	6/306	0.962835	0.0164482	0.999992	0	0	0.539489	0.0204322	DCTN6;MAPK8;NDUFA5;NDUFS6;COX4I1;RB1CC1
Morphine addiction	1991-01-01	0.962997	0.0163753	0.999992	0	0	0.300893	0.0113453	PDE7A
Dilated cardiomyopathy	1996-01-01	0.969141	0.0136131	0.999992	0	0	0.284983	0.00893289	TPM1
Kaposi sarcoma-associated herpesvirus infection	3/193	0.969544	0.0134326	0.999992	0	0	0.426561	0.0131934	MAPK8;NFATC3;RAF1
Aldosterone synthesis and secretion	1998-01-01	0.971303	0.0126453	0.999992	0	0	0.279078	0.00812585	ATF2
Chemical carcinogenesis	4/239	0.972256	0.0122194	0.999992	0	0	0.459406	0.0129259	ATF2;HSP90AB1;ARNT;RAF1
Calcium signaling pathway	4/240	0.972952	0.0119087	0.999992	0	0	0.457435	0.0125432	ASPH;PDGFC;MET;FGFR2
Pancreatic secretion	1/102	0.975184	0.0109134	0.999992	0	0	0.267969	0.00673382	TRPC1
Necroptosis	2/159	0.978477	0.00944924	0.999992	0	0	0.344255	0.00749019	MAPK8;HSP90AB1
Drug metabolism	1/108	0.980045	0.00875397	0.999992	0	0	0.252864	0.00509691	RRM2B
JAK-STAT signaling pathway	2/162	0.980392	0.0086002	0.999992	0	0	0.337747	0.0066883	RAF1;OSMR
Lysosome	1/128	0.990356	0.00420874	0.999992	0	0	0.212821	0.00206244	GGA3
Apelin signaling pathway	1/137	0.993049	0.00302951	0.999992	0	0	0.198643	0.00138568	RAF1
Influenza A	1/172	0.998056	0.000845219	0.999992	0	0	0.157697	0.000306908	RAF1
Neutrophil extracellular trap formation	1/189	0.998953	0.000454998	0.999992	0	0	0.143309	0.000150141	RAF1
Herpes simplex virus 1 infection	7/498	0.998983	0.000441711	0.999992	0	0	0.381238	0.000387748	PPP1CB;PPP1CC;ZFP1;IRAK1;SRSF2;EIF2AK4;SRSF7
Cytokine-cytokine receptor interaction	2/295	0.999737	0.000114204	0.999992	0	0	0.183153	4.81629e-05	IL1R1;OSMR
Neuroactive ligand-receptor interaction	1/341	0.999992	3.26716e-06	0.999992	0	0	0.0786111	5.91385e-07	LPAR1

## Sheet: RI
Term	Overlap	P-value		Adjusted P-value	Old P-value	Old Adjusted P-value	Odds Ratio	Combined Score	Genes
Ribosome	21/158	6.93995e-06	5.15864	0.00185991	0	0	3.35881	39.8967	RPL4;MRPS17;RPS9;RPL3;RPS8;RPL23;RPL12;RPL11;RPL36A;MRPS10;RPL23A;RPL10A;RPL7;RPS4X;MRPL3;RPL7A;RPS27;RPS19;RPS18;RPS2;RPL17
mRNA surveillance pathway	14/98	0.000104683	3.98012	0.0140275	0	0	3.63288	33.2938	CPSF4;CPSF7;SMG1;RNMT;PABPC4;PPP2R3A;SMG7;PPP1CC;NXF1;DDX39B;PABPN1;PPP2R3C;SYMPK;PABPC1
RNA degradation	1979-12-01	0.000177988	3.74961	0.0159002	0	0	3.89854	33.6592	HSPA9;PAN2;LSM7;PFKL;EXOSC10;PAN3;PABPC4;CNOT3;SKIV2L;PABPC1;ENO2;LSM5
Ubiquitin mediated proteolysis	16/140	0.000487177	3.31231	0.0326409	0	0	2.81308	21.455	PIAS4;UBE2H;MAP3K1;UBA7;SMURF1;UBE2C;HUWE1;SYVN1;WWP2;UBE2J2;DDB2;CDC23;CDC34;BIRC6;ELOC;CUL4B
Coronavirus disease	22/232	0.000681361	3.16662	0.0365209	0	0	2.28938	16.6928	RPL4;RPS9;RPL3;RPS8;RPL23;RPL12;RPL11;RPL36A;RPL23A;RPL10A;MAPK12;RPL7;RPS4X;RPL7A;MAPK11;RPS27;RPS19;IRAK1;IRF3;RPS18;RPS2;RPL17
Fructose and mannose metabolism	1933-06-01	0.0029661	2.52781	0.132486	0	0	4.81423	28.0212	PFKL;AKR1B10;FPGT;MPI;GMPPA;ALDOA
Spliceosome	14/150	0.00693952	2.15867	0.21606	0	0	2.2377	11.1226	TCERG1;DDX5;SF3A2;DDX46;PRPF40B;LSM5;U2AF1L4;HNRNPM;LSM7;DDX39B;TRA2A;SRSF5;SRSF7;BCAS2
Glucagon signaling pathway	11/107	0.00789227	2.1028	0.21606	0	0	2.48748	12.0441	CRTC2;LDHA;CAMK2D;PFKL;AKT2;PHKG2;ITPR3;PPP4R3B;SIK2;PDHB;PCK2
GnRH signaling pathway	1993-10-01	0.00813686	2.08954	0.21606	0	0	2.61433	12.5785	MAP2K3;MAPK11;CAMK2D;MAPK7;MAP3K1;PLA2G4B;ITPR3;ADCY6;MAPK12;PLD2
Ribosome biogenesis in eukaryotes	11/108	0.00844596	2.07335	0.21606	0	0	2.46171	11.7523	NOP56;RBM28;NXF1;EMG1;XPO1;UTP4;NVL;RIOK1;UTP18;GTPBP4;NOL6
Homologous recombination	1941-06-01	0.00892356	2.04946	0.21606	0	0	3.71228	17.5185	MUS81;TOP3B;ABRAXAS1;POLD2;RBBP8;RAD54L
Cellular senescence	14/156	0.00967432	2.01438	0.21606	0	0	2.14247	9.9374	MAP2K3;GADD45A;TSC2;ITPR3;FOXO3;MAPK12;PPP1CC;MAPK11;CCNE2;AKT2;CHEK2;RAD1;RAD9B;ATR
p53 signaling pathway	1973-08-01	0.015312	1.81497	0.315662	0	0	2.66709	11.1461	PIDD1;CCNE2;GADD45A;CHEK2;TSC2;MDM4;DDB2;ATR
Lysine degradation	1963-07-01	0.0211046	1.67562	0.404002	0	0	2.70696	10.4442	KMT2A;KMT5C;SUV39H1;KMT2B;SMYD2;PLOD3;PLOD2
HIF-1 signaling pathway	10/109	0.0229542	1.63914	0.410116	0	0	2.18997	8.26551	LDHA;CAMK2D;PFKL;CDKN1B;AKT2;MKNK1;ELOC;PDHB;ENO2;ALDOA
Glycolysis / Gluconeogenesis	1967-07-01	0.028543	1.5445	0.459767	0	0	2.52597	8.9832	LDHA;PFKL;ADPGK;PDHB;ENO2;ALDOA;PCK2
Salmonella infection	18/249	0.0291644	1.53515	0.459767	0	0	1.69312	5.98487	DYNC2H1;MAP2K3;ACTR3;ROCK2;DCTN4;AHNAK2;KLC1;MAPK12;HSP90B1;MAPK11;DYNC1LI2;TUBB6;ACTR1B;IRAK1;AKT2;RIPK1;EXOC2;ARL8A
Fanconi anemia pathway	1954-06-01	0.0316691	1.49936	0.46473	0	0	2.70502	9.33885	MUS81;TOP3B;POLN;EME2;FANCA;ATR
Dopaminergic synapse	11/132	0.0329473	1.48218	0.46473	0	0	1.97094	6.72653	PPP1CC;MAPK11;GSK3A;CAMK2D;PPP2R3C;AKT2;GNB2;ITPR3;ARRB1;PPP2R3A;MAPK12
Neurotrophin signaling pathway	10/119	0.0388511	1.4106	0.520361	0	0	1.98801	6.4571	MAPK11;CAMK2D;MAPK7;MAP3K1;IRAK1;AKT2;RAPGEF1;PTPN11;FOXO3;MAPK12
AMPK signaling pathway	10/120	0.0407746	1.38961	0.520361	0	0	1.96984	6.30287	CRTC2;PFKL;PPP2R3C;AKT2;TSC2;ULK1;PPP2R3A;FOXO3;PCK2;CAMKK2
Vasopressin-regulated water reabsorption	1944-05-01	0.0442065	1.35451	0.538515	0	0	2.77254	8.64725	DYNC2H1;DYNC1LI2;DCTN4;ADCY6;VAMP2
Base excision repair	1933-04-01	0.0567575	1.24598	0.622649	0	0	2.98106	8.55256	POLD2;XRCC1;LIG3;MUTYH
Hepatitis B	12/162	0.0570846	1.24348	0.622649	0	0	1.73376	4.96414	MAP2K3;MAPK11;DDX3X;MAP3K1;CCNE2;IRAK1;IRF3;AKT2;ARAF;STAT6;MAPK12;DDB2
Amino sugar and nucleotide sugar metabolism	1948-05-01	0.06046	1.21853	0.622649	0	0	2.51411	7.05401	NAGK;GNPDA2;FPGT;MPI;GMPPA
Ether lipid metabolism	1949-05-01	0.0649875	1.18717	0.622649	0	0	2.45684	6.71592	PLA2G4B;GDPD3;PAFAH1B2;PAFAH1B1;PLD2
Choline metabolism in cancer	1998-08-01	0.069454	1.1583	0.622649	0	0	1.9237	5.13069	DGKD;CHKA;SLC44A2;AKT2;DGKQ;PLA2G4B;TSC2;PLD2
Glycerophospholipid metabolism	1998-08-01	0.069454	1.1583	0.622649	0	0	1.9237	5.13069	PLPP5;DGKD;PCYT2;CHKA;DGKQ;PLA2G4B;TAZ;PLD2
Inflammatory mediator regulation of TRP channels	1998-08-01	0.069454	1.1583	0.622649	0	0	1.9237	5.13069	MAP2K3;PPP1CC;MAPK11;CAMK2D;PLA2G4B;ITPR3;ADCY6;MAPK12
Cysteine and methionine metabolism	1950-05-01	0.0696995	1.15677	0.622649	0	0	2.40212	6.39819	DNMT1;LDHA;MAT2A;PSAT1;KYAT1
DNA replication	1936-04-01	0.0737504	1.13224	0.637584	0	0	2.70116	7.04211	RNASEH2C;POLA2;RFC1;POLD2
RIG-I-like receptor signaling pathway	1970-06-01	0.0897934	1.04676	0.718178	0	0	2.02706	4.88572	MAPK11;DDX3X;MAP3K1;IRF3;RIPK1;MAPK12
Non-small cell lung cancer	1972-06-01	0.0995689	1.00188	0.718178	0	0	1.96543	4.53407	RASSF1;GADD45A;AKT2;ARAF;FOXO3;DDB2
Platelet activation	9/124	0.100097	0.999581	0.718178	0	0	1.69339	3.89755	PPP1CC;MAPK11;PPP1R12A;ROCK2;AKT2;PLA2G4B;ITPR3;ADCY6;MAPK12
Human T-cell leukemia virus 1 infection	14/219	0.109317	0.961313	0.718178	0	0	1.47913	3.27406	RANBP1;VAC14;CRTC2;MAP3K1;RANBP3;ADCY6;CDC23;XPO1;CCNE2;AKT2;CHEK2;TSPO;TCF3;ATR
Non-homologous end-joining	2023-02-13	0.11095	0.954872	0.718178	0	0	3.9244	8.62847	XRCC6;XRCC5
Endometrial cancer	1958-05-01	0.113825	0.943762	0.718178	0	0	2.03868	4.43023	GADD45A;AKT2;ARAF;FOXO3;DDB2
Small cell lung cancer	1992-07-01	0.113953	0.943275	0.718178	0	0	1.7807	3.86762	CDKN1B;CCNE2;ITGA3;GADD45A;LAMB2;AKT2;DDB2
Lysosome	9/128	0.115697	0.936677	0.718178	0	0	1.63613	3.52877	CTSA;AP4M1;ATP6V0B;AP1G2;NPC1;NEU1;AP3D1;CTSW;NAGPA
Notch signaling pathway	1959-05-01	0.120106	0.920437	0.718178	0	0	2.00082	4.2405	PSENEN;APH1A;TLE3;TLE1;DVL1
Chronic myeloid leukemia	1976-06-01	0.120718	0.918229	0.718178	0	0	1.85273	3.91723	CDKN1B;GADD45A;AKT2;ARAF;PTPN11;DDB2
RNA transport	12/186	0.124767	0.903899	0.718178	0	0	1.49273	3.10682	NUP214;NXF1;NUP205;EIF5;XPO1;DDX39B;PABPC4;EIF3I;RPP21;NUP54;PABPC1;KPNB1
Proteoglycans in cancer	13/205	0.124898	0.903445	0.718178	0	0	1.4658	3.04924	DDX5;CAMK2D;PPP1R12A;ROCK2;ARAF;ITPR3;PTPN11;MAPK12;SLC9A1;PPP1CC;MAPK11;AKT2;GPC1
Amyotrophic lateral sclerosis	21/364	0.132838	0.876677	0.718178	0	0	1.327	2.67872	NUP214;MAP2K3;NUP205;XBP1;NDUFB8;DCTN4;SIGMAR1;ITPR3;AMBRA1;COX5B;KLC1;MAPK12;NXF1;MAPK11;TUBB6;ACTR1B;NDUFS7;ULK1;NUP54;SRSF7;NDUFV1
Shigellosis	15/246	0.133123	0.875746	0.718178	0	0	1.40608	2.83534	ACTR3;GSK3A;ROCK2;ITPR3;FNBP1L;FOXO3;MAPK12;U2AF1L4;MAPK11;IRF3;ATG16L1;AKT2;TIFA;RIPK1;TECPR1
ABC transporters	1945-04-01	0.137719	0.861008	0.718178	0	0	2.10723	4.17767	ABCB6;ABCA3;ABCB8;ABCC10
Phosphatidylinositol signaling system	1997-07-01	0.139294	0.856069	0.718178	0	0	1.68133	3.31418	MTMR2;DGKD;DGKQ;INPPL1;ITPR3;SYNJ2;IP6K1
Citrate cycle (TCA cycle)	2023-03-30	0.146194	0.835069	0.718178	0	0	2.39894	4.61273	PDHB;ACO2;PCK2
Oxytocin signaling pathway	10/154	0.147071	0.832472	0.718178	0	0	1.50204	2.87917	PPP1CC;RGS2;CAMK2D;PPP1R12A;MAPK7;ROCK2;PLA2G4B;ITPR3;ADCY6;CAMKK2
Human immunodeficiency virus 1 infection	13/212	0.149375	0.825721	0.718178	0	0	1.41372	2.68789	MAP2K3;ITPR3;MAPK12;MAPK11;IRAK1;AP1G2;IRF3;AKT2;GNB2;RIPK1;ELOC;ATR;CUL4B
Nucleotide excision repair	1947-04-01	0.154236	0.811813	0.718178	0	0	2.00901	3.75537	RFC1;POLD2;DDB2;CUL4B
Other types of O-glycan biosynthesis	1947-04-01	0.154236	0.811813	0.718178	0	0	2.00901	3.75537	B4GALT2;POMT1;EOGT;PLOD3
Pyruvate metabolism	1947-04-01	0.154236	0.811813	0.718178	0	0	2.00901	3.75537	GRHPR;LDHA;PDHB;PCK2
Autophagy	9/137	0.155316	0.808783	0.718178	0	0	1.52037	2.83137	ATG16L2;ATG16L1;AKT2;TSC2;ATG4B;ULK1;AMBRA1;ATG4D;CAMKK2
Insulin signaling pathway	9/137	0.155316	0.808783	0.718178	0	0	1.52037	2.83137	PPP1CC;AKT2;MKNK1;PHKG2;ARAF;INPPL1;RAPGEF1;TSC2;PCK2
Yersinia infection	9/137	0.155316	0.808783	0.718178	0	0	1.52037	2.83137	MAP2K3;ACTR3;MAPK11;IRAK1;IRF3;ROCK2;AKT2;BAIAP2;MAPK12
Galactose metabolism	2023-03-31	0.15685	0.804516	0.718178	0	0	2.31315	4.28502	B4GALT2;PFKL;AKR1B10
RNA polymerase	2023-03-31	0.15685	0.804516	0.718178	0	0	2.31315	4.28502	POLR3GL;POLR2C;POLR2J
Sphingolipid signaling pathway	8/119	0.158755	0.799274	0.718178	0	0	1.55804	2.8674	SMPD2;MAPK11;ROCK2;PPP2R3C;AKT2;PPP2R3A;MAPK12;PLD2
MAPK signaling pathway	17/294	0.160786	0.793751	0.718178	0	0	1.32874	2.4285	MAP2K3;MAP4K2;MAP3K1;GADD45A;PLA2G4B;ARAF;ARRB1;MAPK8IP3;MAPK12;MAPK11;MAPK7;IRAK1;AKT2;MKNK1;STMN1;TAOK2;MAPKAPK5
Fluid shear stress and atherosclerosis	9/139	0.164925	0.782714	0.724587	0	0	1.49682	2.69767	PIAS4;MAPK11;MAPK7;AKT2;GSTP1;GPC1;MAPK12;HSP90B1;BMPR1A
Primary bile acid biosynthesis	2023-02-17	0.17263	0.762884	0.734385	0	0	2.87729	5.05426	HSD3B7;SCP2
SNARE interactions in vesicular transport	1933-03-01	0.178834	0.74755	0.734385	0	0	2.15871	3.71578	BNIP1;VAMP2;BET1
Toll-like receptor signaling pathway	7/104	0.178874	0.747454	0.734385	0	0	1.55942	2.68388	MAP2K3;MAPK11;IRAK1;IRF3;AKT2;RIPK1;MAPK12
Fc epsilon RI signaling pathway	1968-05-01	0.183257	0.736941	0.734385	0	0	1.71418	2.90873	MAP2K3;MAPK11;AKT2;PLA2G4B;MAPK12
Signaling pathways regulating pluripotency of stem cells	9/143	0.184954	0.732937	0.734385	0	0	1.45183	2.45019	MAPK11;PCGF5;AKT2;DVL1;PCGF3;SMARCAD1;TCF3;MAPK12;BMPR1A
Cell cycle	8/124	0.185581	0.731466	0.734385	0	0	1.49049	2.51037	CDC23;CDKN1B;CCNE2;GADD45A;CHEK2;ORC3;CDC7;ATR
Renal cell carcinoma	1969-05-01	0.190924	0.719139	0.734385	0	0	1.68731	2.79397	AKT2;ARAF;RAPGEF1;PTPN11;ELOC
Parathyroid hormone synthesis, secretion and action	7/106	0.190977	0.719019	0.734385	0	0	1.52775	2.52935	ARAF;LRP5;ITPR3;ARRB1;PTH1R;ADCY6;PLD2
Viral carcinogenesis	12/203	0.191817	0.717113	0.734385	0	0	1.35865	2.24342	RANBP1;HDAC5;VAC14;GTF2A2;CDKN1B;DDX3X;HDAC10;CCNE2;IRF3;SCRIB;CHD4;GTF2E2
Central carbon metabolism in cancer	1970-05-01	0.198703	0.701795	0.750036	0	0	1.66126	2.6845	LDHA;PFKL;AKT2;SIRT6;PDHB
Nicotinate and nicotinamide metabolism	1935-03-01	0.20159	0.695531	0.750364	0	0	2.02358	3.2408	SIRT6;NT5C2;NADK
Glycosaminoglycan biosynthesis	1953-04-01	0.207698	0.682568	0.762507	0	0	1.76245	2.76999	B4GALT2;NDST2;EXT2;XYLT2
Oocyte meiosis	8/129	0.214193	0.669196	0.763649	0	0	1.42852	2.20118	PPP1CC;MAPK11;CAMK2D;CDC23;CCNE2;ITPR3;ADCY6;MAPK12
One carbon pool by folate	2023-02-20	0.221716	0.654203	0.763649	0	0	2.39736	3.61129	MTFMT;TYMS
Adrenergic signaling in cardiomyocytes	9/150	0.222389	0.652886	0.763649	0	0	1.37925	2.07346	PPP1CC;MAPK11;CAMK2D;PPP2R3C;AKT2;PPP2R3A;ADCY6;MAPK12;SLC9A1
FoxO signaling pathway	8/131	0.226085	0.645728	0.763649	0	0	1.40514	2.08923	MAPK11;CDKN1B;GADD45A;AKT2;ARAF;FOXO3;MAPK12;PCK2
Transcriptional misregulation in cancer	11/192	0.233704	0.631333	0.763649	0	0	1.31343	1.90933	DDX5;CCNT2;CDKN1B;KMT2A;LDB1;GADD45A;NFKBIZ;TCF3;ETV4;MEN1;DDB2
Hedgehog signaling pathway	1956-04-01	0.236186	0.626746	0.763649	0	0	1.66051	2.39634	SMURF1;IQCE;ARRB1;CSNK1G1
Phosphonate and phosphinate metabolism	2023-01-06	0.23831	0.622858	0.763649	0	0	4.31332	6.18609	PCYT2
Vitamin B6 metabolism	2023-01-06	0.23831	0.622858	0.763649	0	0	4.31332	6.18609	PSAT1
Glioma	1975-05-01	0.239087	0.621445	0.763649	0	0	1.54219	2.20677	CAMK2D;GADD45A;AKT2;ARAF;DDB2
Lipid and atherosclerosis	12/215	0.247272	0.606826	0.763649	0	0	1.27752	1.78504	MAP2K3;MAPK11;XBP1;CAMK2D;IRAK1;IRF3;ROCK2;AKT2;MIB2;AGER;MAPK12;HSP90B1
Gastric acid secretion	1976-05-01	0.247423	0.606561	0.763649	0	0	1.52039	2.12347	CAMK2D;ITPR3;SLC4A2;ADCY6;SLC9A1
Pancreatic cancer	1976-05-01	0.247423	0.606561	0.763649	0	0	1.52039	2.12347	GADD45A;AKT2;ARAF;DDB2;PLD2
Various types of N-glycan biosynthesis	1939-03-01	0.248841	0.604077	0.763649	0	0	1.79836	2.50141	B4GALT2;MGAT4B;B4GALNT4
Cushing syndrome	9/155	0.25075	0.600758	0.763649	0	0	1.33166	1.84208	CAMK2D;CDKN1B;CCNE2;KMT2A;DVL1;ITPR3;PDE8A;ADCY6;MEN1
Non-alcoholic fatty liver disease	9/155	0.25075	0.600758	0.763649	0	0	1.33166	1.84208	MAPK11;XBP1;GSK3A;NDUFB8;NDUFS7;AKT2;COX5B;NDUFV1;MAPK12
Arginine biosynthesis	2023-02-22	0.255018	0.593429	0.767661	0	0	2.1574	2.94792	ACY1;GPT
Pathogenic Escherichia coli infection	11/197	0.259218	0.586335	0.767661	0	0	1.27778	1.72512	ACTR3;MAPK11;TUBB6;IRAK1;ROCK2;NCL;RIPK1;PTPN11;BAIAP2;MYO1H;MAPK12
Prostate cancer	1997-06-01	0.260661	0.583924	0.767661	0	0	1.42361	1.91409	CDKN1B;CCNE2;AKT2;GSTP1;ARAF;HSP90B1
VEGF signaling pathway	1959-04-01	0.265523	0.575898	0.77348	0	0	1.56969	2.08149	MAPK11;AKT2;PLA2G4B;MAPK12
Mannose type O-glycan biosynthesis	2023-02-23	0.271718	0.565882	0.774685	0	0	2.05456	2.67707	B4GALT2;POMT1
Mismatch repair	2023-02-23	0.271718	0.565882	0.774685	0	0	2.05456	2.67707	RFC1;POLD2
Growth hormone synthesis, secretion and action	7/119	0.276511	0.558287	0.780053	0	0	1.3495	1.73479	MAP2K3;MAPK11;MAP3K1;AKT2;ITPR3;ADCY6;MAPK12
Progesterone-mediated oocyte maturation	6/100	0.283513	0.547427	0.781086	0	0	1.37796	1.73691	MAPK11;CDC23;AKT2;ARAF;ADCY6;MAPK12
Glycerolipid metabolism	1961-04-01	0.285437	0.54449	0.781086	0	0	1.51445	1.89872	PLPP5;DGKD;AKR1B10;DGKQ
Epstein-Barr virus infection	11/202	0.285621	0.54421	0.781086	0	0	1.24401	1.55885	MAP2K3;MAPK11;CDKN1B;CCNE2;IRAK1;IRF3;GADD45A;AKT2;RIPK1;MAPK12;DDB2
Diabetic cardiomyopathy	11/203	0.290995	0.536114	0.787744	0	0	1.23746	1.52758	PPP1CC;MAPK11;CAMK2D;NDUFB8;NDUFS7;AKT2;PDHB;COX5B;AGER;NDUFV1;MAPK12
Apoptosis	8/142	0.295193	0.529895	0.791116	0	0	1.28905	1.5728	PIDD1;DFFB;GADD45A;AKT2;ITPR3;RIPK1;CTSW;BIRC6
Longevity regulating pathway	6/102	0.298986	0.524349	0.792308	0	0	1.34911	1.62886	AKT2;TSC2;ULK1;FOXO3;ADCY6;CAMKK2
Human papillomavirus infection	17/331	0.30155	0.52064	0.792308	0	0	1.16986	1.40245	HES6;ATP6V0B;CDKN1B;ITGA3;LAMB2;TSC2;SCRIB;CHD4;PPP2R3A;THBS3;CCNE2;IRF3;PPP2R3C;AKT2;DVL1;TADA3;ATR
Glycosylphosphatidylinositol (GPI)-anchor biosynthesis	2023-02-26	0.321609	0.492672	0.828439	0	0	1.79746	2.03907	PIGO;PIGQ
Basal transcription factors	1945-03-01	0.322084	0.492031	0.828439	0	0	1.54097	1.74583	GTF2A2;GTF2F1;GTF2E2
Hepatocellular carcinoma	9/168	0.329186	0.482558	0.828439	0	0	1.22195	1.35774	SMARCD3;GADD45A;AKT2;GSTP1;DVL1;ARAF;LRP5;BRD7;DDB2
Thermogenesis	12/232	0.334097	0.476128	0.828439	0	0	1.17775	1.29119	MAP2K3;MAPK11;NDUFB8;SMARCD3;NDUFS7;COX15;TSC2;SIRT6;COX5B;NDUFV1;ADCY6;MAPK12
Phospholipase D signaling pathway	8/148	0.334827	0.47518	0.828439	0	0	1.23341	1.34953	DGKD;AKT2;DGKQ;PLA2G4B;TSC2;PTPN11;ADCY6;PLD2
Retrograde endocannabinoid signaling	8/148	0.334827	0.47518	0.828439	0	0	1.23341	1.34953	MAPK11;NDUFB8;NDUFS7;GNB2;ITPR3;NDUFV1;ADCY6;MAPK12
Biosynthesis of unsaturated fatty acids	2023-02-27	0.338073	0.470989	0.828439	0	0	1.72547	1.87126	SCP2;TECR
Gastric cancer	8/149	0.34152	0.466584	0.828439	0	0	1.2246	1.31565	CDKN1B;CCNE2;GADD45A;AKT2;DVL1;ARAF;LRP5;DDB2
Long-term potentiation	1967-04-01	0.346157	0.460727	0.828439	0	0	1.36979	1.45316	PPP1CC;CAMK2D;ARAF;ITPR3
Insulin resistance	6/108	0.346213	0.460656	0.828439	0	0	1.26935	1.3464	PPP1CC;CRTC2;AKT2;NR1H2;PTPN11;PCK2
PD-L1 expression and PD-1 checkpoint pathway in cancer	1989-05-01	0.360524	0.443066	0.844382	0	0	1.28422	1.31015	MAP2K3;MAPK11;AKT2;PTPN11;MAPK12
Pathways of neurodegeneration	23/475	0.362235	0.441009	0.844382	0	0	1.09903	1.11603	MAP2K3;NDUFB8;XBP1;CAMK2D;UBA7;DCTN4;SIGMAR1;ARAF;LRP5;ITPR3;AMBRA1;KLC1;UBE2J2;COX5B;AGER;MAPK12;MAPK11;TUBB6;ACTR1B;NDUFS7;DVL1;ULK1;NDUFV1
Adipocytokine signaling pathway	1969-04-01	0.366518	0.435905	0.844382	0	0	1.3275	1.33242	AKT2;PTPN11;CAMKK2;PCK2
Sphingolipid metabolism	1949-03-01	0.371145	0.430456	0.844382	0	0	1.40667	1.39424	SMPD2;SMPD4;NEU1
Epithelial cell signaling in Helicobacter pylori infection	1970-04-01	0.376688	0.424018	0.844382	0	0	1.30732	1.27638	MAPK11;ATP6V0B;PTPN11;MAPK12
Prolactin signaling pathway	1970-04-01	0.376688	0.424018	0.844382	0	0	1.30732	1.27638	MAPK11;AKT2;FOXO3;MAPK12
Vascular smooth muscle contraction	7/133	0.376923	0.423747	0.844382	0	0	1.19867	1.16956	PPP1CC;PPP1R12A;ROCK2;PLA2G4B;ARAF;ITPR3;ADCY6
Toxoplasmosis	6/112	0.378081	0.422415	0.844382	0	0	1.22119	1.18778	MAP2K3;MAPK11;IRAK1;LAMB2;AKT2;MAPK12
Glyoxylate and dicarboxylate metabolism	1930-02-01	0.386637	0.412696	0.849334	0	0	1.54036	1.46375	GRHPR;ACO2
Pentose phosphate pathway	1930-02-01	0.386637	0.412696	0.849334	0	0	1.54036	1.46375	PFKL;ALDOA
Ubiquinone and other terpenoid-quinone biosynthesis	2023-01-11	0.392939	0.405675	0.851119	0	0	2.15609	2.01401	COQ6
Salivary secretion	1993-05-01	0.396041	0.40226	0.851119	0	0	1.22558	1.13518	ITPR3;SLC4A2;VAMP2;ADCY6;SLC9A1
Melanoma	1972-04-01	0.396977	0.401235	0.851119	0	0	1.26874	1.17216	GADD45A;AKT2;ARAF;DDB2
Endocrine and other factor-regulated calcium reabsorption	1953-03-01	0.419505	0.377262	0.892281	0	0	1.29387	1.12396	PTH1R;AP2M1;ADCY6
Fc gamma R-mediated phagocytosis	1997-05-01	0.431369	0.365152	0.910289	0	0	1.17205	0.985453	ACTR3;AKT2;PLA2G4B;INPPL1;PLD2
Pertussis	1976-04-01	0.437173	0.359347	0.915331	0	0	1.198	0.991256	MAPK11;IRF3;IRAK1;MAPK12
Endocytosis	12/252	0.442319	0.354265	0.918926	0	0	1.07846	0.879724	ACTR3;TSG101;IST1;SMURF1;SNX12;VPS37D;ARRB1;CHMP6;AP2M1;SPG21;SNX6;PLD2
Pyrimidine metabolism	1956-03-01	0.454949	0.342037	0.922045	0	0	1.22044	0.961181	DTYMK;NT5C2;TYMS
Wnt signaling pathway	8/166	0.456477	0.340581	0.922045	0	0	1.09186	0.856258	TLE3;PORCN;CAMK2D;TLE1;ROCK2;DVL1;LRP5;NOTUM
Synaptic vesicle cycle	1978-04-01	0.45699	0.340093	0.922045	0	0	1.1655	0.912693	ATP6V0B;UNC13A;AP2M1;VAMP2
AGE-RAGE signaling pathway in diabetic complications	5/100	0.457582	0.339531	0.922045	0	0	1.13486	0.887233	MAPK11;CDKN1B;AKT2;AGER;MAPK12
Alzheimer disease	17/369	0.471327	0.326678	0.940865	0	0	1.04146	0.78339	PSENEN;XBP1;NDUFB8;ARAF;LRP5;ITPR3;AMBRA1;COX5B;KLC1;AGER;APH1A;TUBB6;NDUFS7;AKT2;DVL1;ULK1;NDUFV1
C-type lectin receptor signaling pathway	5/104	0.491971	0.308061	0.940865	0	0	1.08878	0.77231	MAPK11;AKT2;ITPR3;PTPN11;MAPK12
NF-kappa B signaling pathway	5/104	0.491971	0.308061	0.940865	0	0	1.08878	0.77231	PIAS4;PIDD1;IRAK1;GADD45A;RIPK1
Thyroid cancer	1937-02-01	0.492997	0.307156	0.940865	0	0	1.23183	0.871216	GADD45A;DDB2
Long-term depression	1960-03-01	0.500717	0.300408	0.940865	0	0	1.13456	0.784788	PLA2G4B;ARAF;ITPR3
PI3K-Akt signaling pathway	16/354	0.505429	0.29634	0.940865	0	0	1.02039	0.696258	CRTC2;CDKN1B;ITGA3;LAMB2;TSC2;PPP2R3A;FOXO3;EPOR;HSP90B1;THBS3;CCNE2;PPP2R3C;AKT2;GNB2;MTCP1;PCK2
Purine metabolism	6/129	0.511672	0.291009	0.940865	0	0	1.05147	0.704558	NUDT9;NT5C2;PDE8A;PFAS;PDE9A;ADCY6
Relaxin signaling pathway	6/129	0.511672	0.291009	0.940865	0	0	1.05147	0.704558	MAPK11;AKT2;GNB2;ARRB1;ADCY6;MAPK12
ErbB signaling pathway	1985-04-01	0.524229	0.280479	0.940865	0	0	1.06438	0.687407	CAMK2D;CDKN1B;AKT2;ARAF
mTOR signaling pathway	7/154	0.527994	0.277371	0.940865	0	0	1.0263	0.655466	AKT2;NPRL2;DVL1;LRP5;TSC2;ULK1;DEPDC5
Colorectal cancer	1986-04-01	0.533512	0.272856	0.940865	0	0	1.05135	0.660535	GADD45A;AKT2;ARAF;DDB2
Insulin secretion	1986-04-01	0.533512	0.272856	0.940865	0	0	1.05135	0.660535	CAMK2D;ITPR3;VAMP2;ADCY6
Basal cell carcinoma	1963-03-01	0.53372	0.272687	0.940865	0	0	1.07766	0.676645	GADD45A;DVL1;DDB2
Cytosolic DNA-sensing pathway	1963-03-01	0.53372	0.272687	0.940865	0	0	1.07766	0.676645	IRF3;POLR3GL;RIPK1
Glycine, serine and threonine metabolism	1940-02-01	0.534893	0.271733	0.940865	0	0	1.1344	0.709784	GRHPR;PSAT1
Selenocompound metabolism	2023-01-17	0.537678	0.269477	0.940865	0	0	1.34714	0.835891	KYAT1
Oxidative phosphorylation	6/133	0.541699	0.266242	0.940865	0	0	1.01813	0.624161	ATP6V0B;NDUFB8;NDUFS7;COX15;COX5B;NDUFV1
Human cytomegalovirus infection	10/225	0.542877	0.265298	0.940865	0	0	1.00225	0.612249	MAPK11;IRF3;ROCK2;AKT2;GNB2;TSC2;ITPR3;RIPK1;ADCY6;MAPK12
GnRH secretion	1964-03-01	0.544443	0.264048	0.940865	0	0	1.05994	0.644433	AKT2;ARRB1;ITPR3
Bladder cancer	1941-02-01	0.54832	0.260966	0.940865	0	0	1.10526	0.664146	RASSF1;ARAF
Parkinson disease	11/249	0.548835	0.260558	0.940865	0	0	0.995861	0.597474	XBP1;TUBB6;CAMK2D;NDUFB8;UBA7;NDUFS7;ITPR3;UBE2J2;COX5B;KLC1;NDUFV1
ECM-receptor interaction	1988-04-01	0.551802	0.258217	0.940865	0	0	1.02621	0.61015	ITGA3;LAMB2;AGRN;THBS3
Gap junction	1988-04-01	0.551802	0.258217	0.940865	0	0	1.02621	0.61015	TUBB6;MAPK7;ITPR3;ADCY6
Cortisol synthesis and secretion	1965-03-01	0.555022	0.25569	0.940865	0	0	1.04279	0.613938	ITPR3;PDE8A;ADCY6
TNF signaling pathway	5/112	0.558082	0.253302	0.940865	0	0	1.00695	0.587303	MAP2K3;MAPK11;AKT2;RIPK1;MAPK12
Other glycan degradation	2023-01-18	0.5582	0.25321	0.940865	0	0	1.26783	0.739192	NEU1
Cholinergic synapse	5/113	0.566046	0.247148	0.942338	0	0	0.997575	0.567699	CAMK2D;AKT2;GNB2;ITPR3;ADCY6
Apelin signaling pathway	6/137	0.570894	0.243444	0.942338	0	0	0.986838	0.553173	HDAC5;AKT2;GNB2;ITPR3;ADCY6;SLC9A1
Glutamatergic synapse	5/114	0.573936	0.241136	0.942338	0	0	0.988371	0.54878	GNB2;PLA2G4B;ITPR3;ADCY6;PLD2
Pathways in cancer	23/531	0.577186	0.238684	0.942338	0	0	0.974945	0.53582	CAMK2D;CDKN1B;ITGA3;ROCK2;GADD45A;LAMB2;GSTP1;ARAF;LRP5;CSF2RA;ADCY6;EPOR;DDB2;HSP90B1;PLD2;RASSF1;CCNE2;AKT2;GNB2;DVL1;STAT6;ELOC;IL12RB1
Morphine addiction	1991-04-01	0.578506	0.237692	0.942338	0	0	0.990667	0.542198	GNB2;ARRB1;PDE8A;ADCY6
JAK-STAT signaling pathway	7/162	0.582021	0.235062	0.942338	0	0	0.972918	0.526591	PIAS4;AKT2;STAT6;PTPN11;IL12RB1;CSF2RA;EPOR
Mitophagy	1968-03-01	0.585858	0.232208	0.942338	0	0	0.994501	0.531738	ULK1;AMBRA1;FOXO3
Th1 and Th2 cell differentiation	1992-04-01	0.587203	0.231212	0.942338	0	0	0.979358	0.521395	MAPK11;STAT6;IL12RB1;MAPK12
Glycosphingolipid biosynthesis	1945-02-01	0.599265	0.222381	0.952628	0	0	1.00223	0.513195	B4GALT2;B4GALNT1
Huntington disease	13/306	0.603069	0.219633	0.952628	0	0	0.955397	0.483167	NDUFB8;DCTN4;AMBRA1;COX5B;KLC1;TUBB6;ACTR1B;NDUFS7;POLR2C;ULK1;NDUFV1;POLR2J;AP2M1
IL-17 signaling pathway	1994-04-01	0.604279	0.218763	0.952628	0	0	0.957493	0.482308	MAPK11;MAPK7;MAPK12;HSP90B1
Spinocerebellar ataxia	6/143	0.612897	0.212613	0.953341	0	0	0.943321	0.461811	NOP56;XBP1;AKT2;ULK1;ITPR3;AMBRA1
cGMP-PKG signaling pathway	7/167	0.614204	0.211688	0.953341	0	0	0.942266	0.459287	PPP1CC;RGS2;PPP1R12A;ROCK2;AKT2;ITPR3;ADCY6
cAMP signaling pathway	9/216	0.623324	0.205286	0.953341	0	0	0.936219	0.44254	PPP1CC;CAMK2D;PPP1R12A;GIPR;ROCK2;AKT2;ADCY6;PLD2;SLC9A1
Circadian entrainment	1997-04-01	0.629071	0.2013	0.953341	0	0	0.92646	0.429424	CAMK2D;GNB2;ITPR3;ADCY6
Inositol phosphate metabolism	1973-03-01	0.634115	0.197832	0.953341	0	0	0.923222	0.420552	MTMR2;INPPL1;SYNJ2
Protein processing in endoplasmic reticulum	7/171	0.63896	0.194527	0.953341	0	0	0.91909	0.411673	XBP1;SSR4;SYVN1;DERL2;UBE2J2;HSP90B1;SEC31A
Breast cancer	6/147	0.639583	0.194103	0.953341	0	0	0.916367	0.40956	GADD45A;AKT2;DVL1;ARAF;LRP5;DDB2
Protein export	2023-01-23	0.647938	0.188467	0.953341	0	0	0.979427	0.425033	SPCS1
Proximal tubule bicarbonate reclamation	2023-01-23	0.647938	0.188467	0.953341	0	0	0.979427	0.425033	PCK2
Renin-angiotensin system	2023-01-23	0.647938	0.188467	0.953341	0	0	0.979427	0.425033	CTSA
Thyroid hormone synthesis	1975-03-01	0.652286	0.185562	0.953341	0	0	0.897483	0.38347	ITPR3;ADCY6;HSP90B1
Cholesterol metabolism	1950-02-01	0.656696	0.182636	0.953341	0	0	0.897599	0.377471	NPC1;TSPO
N-Glycan biosynthesis	1950-02-01	0.656696	0.182636	0.953341	0	0	0.897599	0.377471	B4GALT2;MGAT4B
Vitamin digestion and absorption	2023-01-24	0.663569	0.178114	0.953341	0	0	0.936795	0.3842	SLC19A1
Ovarian steroidogenesis	1951-02-01	0.667359	0.175641	0.953341	0	0	0.879234	0.355587	PLA2G4B;ADCY6
Chagas disease	4/102	0.66812	0.175145	0.953341	0	0	0.878961	0.354473	MAPK11;IRAK1;AKT2;MAPK12
Pancreatic secretion	4/102	0.66812	0.175145	0.953341	0	0	0.878961	0.354473	ITPR3;SLC4A2;ADCY6;SLC9A1
Leishmaniasis	1977-03-01	0.669802	0.174053	0.953341	0	0	0.873135	0.349928	MAPK11;IRAK1;MAPK12
Focal adhesion	8/201	0.672319	0.172425	0.953341	0	0	0.892206	0.354226	PPP1CC;PPP1R12A;ITGA3;ROCK2;LAMB2;AKT2;RAPGEF1;THBS3
alpha-Linolenic acid metabolism	2023-01-25	0.678508	0.168445	0.957053	0	0	0.897714	0.348187	PLA2G4B
Tuberculosis	7/180	0.691164	0.160419	0.967011	0	0	0.870862	0.321677	HSPA9;MAPK11;ATP6V0B;CAMK2D;IRAK1;AKT2;MAPK12
Folate biosynthesis	2023-01-26	0.692784	0.159402	0.967011	0	0	0.861761	0.316298	AKR1B10
Th17 cell differentiation	4/107	0.704255	0.15227	0.971819	0	0	0.836073	0.29314	MAPK11;STAT6;IL12RB1;MAPK12
Fatty acid elongation	2023-01-27	0.706427	0.150933	0.971819	0	0	0.828573	0.287959	TECR
Regulation of lipolysis in adipocytes	1955-02-01	0.707348	0.150367	0.971819	0	0	0.812707	0.281385	AKT2;ADCY6
Peroxisome	1982-03-01	0.710733	0.148293	0.971819	0	0	0.817659	0.279196	SCP2;PEX11A;PEX1
Alcoholism	7/186	0.723132	0.140782	0.983753	0	0	0.841404	0.272753	PPP1CC;HDAC5;HDAC10;GNB2;ARAF;CAMKK1;CAMKK2
Linoleic acid metabolism	2023-01-29	0.731923	0.135534	0.98944	0	0	0.769308	0.240085	PLA2G4B
Hippo signaling pathway	6/163	0.734696	0.133892	0.98944	0	0	0.822285	0.253509	PPP1CC;RASSF1;DVL1;SCRIB;BMPR1A;TEAD3
Measles	5/139	0.74353	0.128702	0.990963	0	0	0.802916	0.237941	CDKN1B;CCNE2;IRAK1;IRF3;AKT2
Serotonergic synapse	4/113	0.743743	0.128577	0.990963	0	0	0.789801	0.233828	GNB2;PLA2G4B;ARAF;ITPR3
Leukocyte transendothelial migration	4/114	0.749918	0.124986	0.990963	0	0	0.78258	0.22522	MAPK11;ROCK2;PTPN11;MAPK12
Chemokine signaling pathway	7/192	0.752767	0.123339	0.990963	0	0	0.813857	0.231135	GSK3A;ROCK2;AKT2;GNB2;ARRB1;FOXO3;ADCY6
Regulation of actin cytoskeleton	8/218	0.755842	0.121569	0.990963	0	0	0.819243	0.229324	ACTR3;PPP1CC;PPP1R12A;ITGA3;ROCK2;ARAF;BAIAP2;SLC9A1
GABAergic synapse	1989-03-01	0.761314	0.118436	0.990963	0	0	0.750829	0.204758	GNB2;ADCY6;TRAK2
Bile secretion	1990-03-01	0.767922	0.114683	0.990963	0	0	0.742159	0.19598	SLC4A2;ADCY6;SLC9A1
Influenza A	6/172	0.779693	0.108076	0.990963	0	0	0.777334	0.193443	CPSF4;NXF1;XPO1;IRF3;PABPN1;AKT2
Pentose and glucuronate interconversions	1934-01-01	0.786402	0.104355	0.990963	0	0	0.652575	0.156806	AKR1B10
Propanoate metabolism	1934-01-01	0.786402	0.104355	0.990963	0	0	0.652575	0.156806	LDHA
Inflammatory bowel disease	1965-02-01	0.789973	0.102388	0.990963	0	0	0.683347	0.161103	STAT6;IL12RB1
Thyroid hormone signaling pathway	4/121	0.789975	0.102387	0.990963	0	0	0.735488	0.173395	PFKL;AKT2;TSC2;SLC9A1
TGF-beta signaling pathway	1994-03-01	0.79287	0.100798	0.990963	0	0	0.709388	0.164646	TGIF2;SMURF1;BMPR1A
Acute myeloid leukemia	1967-02-01	0.803798	0.0948533	0.990963	0	0	0.662251	0.144641	AKT2;ARAF
Starch and sucrose metabolism	1936-01-01	0.804959	0.0942262	0.990963	0	0	0.615221	0.133481	AGL
Phagosome	5/152	0.809404	0.0918348	0.990963	0	0	0.731408	0.154662	DYNC2H1;TUBB6;DYNC1LI2;ATP6V0B;THBS3
Ras signaling pathway	8/232	0.812396	0.0902324	0.990963	0	0	0.767471	0.159456	RASSF1;AKT2;GNB2;PLA2G4B;PTPN11;RGL2;EXOC2;PLD2
Alanine, aspartate and glutamate metabolism	1937-01-01	0.813625	0.0895759	0.990963	0	0	0.5981	0.123362	GPT
Aldosterone synthesis and secretion	1998-03-01	0.815544	0.0885527	0.990963	0	0	0.679376	0.138525	CAMK2D;ITPR3;ADCY6
Amphetamine addiction	1969-02-01	0.816807	0.0878805	0.990963	0	0	0.642415	0.129994	PPP1CC;CAMK2D
Renin secretion	1969-02-01	0.816807	0.0878805	0.990963	0	0	0.642415	0.129994	ITPR3;ADCY6
NOD-like receptor signaling pathway	6/181	0.818685	0.0868832	0.990963	0	0	0.737007	0.147443	MAPK11;IRF3;ATG16L1;ITPR3;RIPK1;MAPK12
Hematopoietic cell lineage	1999-03-01	0.820872	0.0857245	0.990963	0	0	0.672264	0.132697	ITGA3;CSF2RA;EPOR
Rap1 signaling pathway	7/210	0.827829	0.0820593	0.991797	0	0	0.740987	0.140009	MAP2K3;MAPK11;SIPA1L1;AKT2;RAPGEF1;ADCY6;MAPK12
Melanogenesis	3/101	0.831136	0.080328	0.991797	0	0	0.658475	0.121793	CAMK2D;DVL1;ADCY6
Necroptosis	5/159	0.838871	0.0763046	0.991797	0	0	0.697905	0.12262	CAMK2D;PLA2G4B;RIPK1;STAT6;CHMP6
T cell receptor signaling pathway	3/104	0.845582	0.072844	0.991797	0	0	0.638815	0.107148	MAPK11;AKT2;MAPK12
PPAR signaling pathway	1974-02-01	0.846009	0.072625	0.991797	0	0	0.597646	0.0999415	SCP2;PCK2
Neutrophil extracellular trap formation	6/189	0.848579	0.0713079	0.991797	0	0	0.70449	0.115672	HDAC5;MAPK11;HDAC10;AKT2;AGER;MAPK12
Tryptophan metabolism	1942-01-01	0.851513	0.0698085	0.991797	0	0	0.525023	0.0843922	KYAT1
Porphyrin and chlorophyll metabolism	1943-01-01	0.858113	0.0664557	0.991797	0	0	0.512496	0.0784221	COX15
Prion disease	9/273	0.859495	0.0657569	0.991797	0	0	0.731867	0.110813	MAPK11;TUBB6;NDUFB8;NDUFS7;ITPR3;COX5B;KLC1;NDUFV1;MAPK12
Kaposi sarcoma-associated herpesvirus infection	6/193	0.861949	0.0645186	0.991797	0	0	0.689275	0.102398	MAPK11;IRF3;AKT2;GNB2;ITPR3;MAPK12
Estrogen signaling pathway	4/137	0.862271	0.0643562	0.991797	0	0	0.646463	0.0957966	AKT2;ITPR3;ADCY6;HSP90B1
Tight junction	5/169	0.87438	0.0582998	0.999995	0	0	0.655004	0.0879279	ACTR3;MAP3K1;ROCK2;SYMPK;SCRIB
B cell receptor signaling pathway	1981-02-01	0.879801	0.0556156	0.999995	0	0	0.54449	0.0697272	AKT2;INPPL1
Carbohydrate digestion and absorption	1947-01-01	0.881707	0.0546759	0.999995	0	0	0.467833	0.0588983	AKT2
Arginine and proline metabolism	1950-01-01	0.896792	0.0473082	0.999995	0	0	0.439121	0.0478339	P4HA1
Malaria	1950-01-01	0.896792	0.0473082	0.999995	0	0	0.439121	0.0478339	THBS3
Vibrio cholerae infection	1950-01-01	0.896792	0.0473082	0.999995	0	0	0.439121	0.0478339	ATP6V0B
Taste transduction	1986-02-01	0.899594	0.0459536	0.999995	0	0	0.511945	0.05417	ITPR3;ADCY6
Cardiac muscle contraction	1987-02-01	0.903169	0.044231	0.999995	0	0	0.505896	0.0515233	COX5B;SLC9A1
Axon guidance	5/182	0.910422	0.0407572	0.999995	0	0	0.60648	0.0569163	CAMK2D;ROCK2;SEMA3B;PTPN11;SEMA3F
Hepatitis C	4/157	0.92179	0.0353681	0.999995	0	0	0.561366	0.0457165	IRF3;AKT2;ARAF;RIPK1
Osteoclast differentiation	3/127	0.9247	0.033999	0.999995	0	0	0.519696	0.0406847	MAPK11;AKT2;MAPK12
Glutathione metabolism	1957-01-01	0.924936	0.0338884	0.999995	0	0	0.38409	0.0299709	GSTP1
Legionellosis	1957-01-01	0.924936	0.0338884	0.999995	0	0	0.38409	0.0299709	CLK1
Dilated cardiomyopathy	1996-02-01	0.93039	0.0313349	0.999995	0	0	0.457242	0.0329906	ITGA3;ADCY6
Mineral absorption	1960-01-01	0.934513	0.0294147	0.999995	0	0	0.364502	0.0246877	CLCN2
Arachidonic acid metabolism	1961-01-01	0.937426	0.028063	0.999995	0	0	0.358409	0.0231595	PLA2G4B
Protein digestion and absorption	2/103	0.946378	0.0239353	0.999995	0	0	0.425396	0.0234449	COL16A1;COL7A1
Aminoacyl-tRNA biosynthesis	1966-01-01	0.950161	0.022203	0.999995	0	0	0.330752	0.0169095	MTFMT
Chemical carcinogenesis	6/239	0.956794	0.0191817	0.999995	0	0	0.55185	0.0243738	AKT2;GSTP1;ARRB1;ADCY6;KPNB1;HSP90B1
Adherens junction	1971-01-01	0.960306	0.0175905	0.999995	0	0	0.307046	0.0124365	BAIAP2
MicroRNAs in cancer	8/310	0.967626	0.0142925	0.999995	0	0	0.566899	0.0186564	HDAC5;RASSF1;DNMT1;CDKN1B;MAPK7;CCNE2;STMN1;MDM4
Metabolism of xenobiotics by cytochrome P450	1976-01-01	0.968387	0.0139509	0.999995	0	0	0.286501	0.00920329	GSTP1
Arrhythmogenic right ventricular cardiomyopathy	1977-01-01	0.969795	0.0133202	0.999995	0	0	0.282717	0.00867117	ITGA3
Bacterial invasion of epithelial cells	1977-01-01	0.969795	0.0133202	0.999995	0	0	0.282717	0.00867117	ACTR3
Natural killer cell mediated cytotoxicity	2/131	0.981671	0.00803403	0.999995	0	0	0.332571	0.00615225	ARAF;PTPN11
Hypertrophic cardiomyopathy	1990-01-01	0.983293	0.00731715	0.999995	0	0	0.241256	0.00406477	ITGA3
Rheumatoid arthritis	1993-01-01	0.985428	0.00637532	0.999995	0	0	0.233352	0.00342554	ATP6V0B
Amoebiasis	1/102	0.990331	0.00421959	0.999995	0	0	0.212458	0.00206423	LAMB2
Drug metabolism	1/108	0.992645	0.00320597	0.999995	0	0	0.200481	0.00147995	GSTP1
Calcium signaling pathway	4/240	0.994562	0.00236812	0.999995	0	0	0.362343	0.00197579	CAMK2D;MST1;PHKG2;ITPR3
Cytokine-cytokine receptor interaction	5/295	0.997115	0.00125471	0.999995	0	0	0.367953	0.00106305	CLCF1;IL12RB1;CSF2RA;EPOR;BMPR1A
Cell adhesion molecules	1/148	0.998814	0.000515552	0.999995	0	0	0.145621	0.000172867	GLG1
Herpes simplex virus 1 infection	10/498	0.998931	0.000464538	0.999995	0	0	0.435188	0.000465494	PPP1CC;NXF1;ZFP57;IRAK1;IRF3;AKT2;TSC2;PTPN11;SRSF5;SRSF7
Neuroactive ligand-receptor interaction	3/341	0.999972	1.22761e-05	0.999995	0	0	0.188509	5.32852e-06	GIPR;TSPO;PTH1R
Olfactory transduction	3/440	0.999995	1.98273e-06	0.999995	0	0	0.145035	6.62143e-07	RGS2;CAMK2D;ARRB1

## Sheet: SE
Term	Overlap	P-value		Adjusted P-value	Old P-value	Old Adjusted P-value	Odds Ratio	Combined Score	Genes
Ubiquitin mediated proteolysis	43/140	2.4592e-07	6.60921	7.47598e-05	0	0	2.76162	42.0271	UBE3C;AIRE;CUL3;CUL2;NEDD4L;XIAP;CBLB;UBE3A;UBE2J2;UBE2L3;RHOBTB2;HERC3;COP1;UBE2Q2;CDC26;UBR5;ELOC;BTRC;SKP2;UBE2H;UBE2I;SMURF2;UBE2B;FBXW11;FBXW7;HUWE1;UBE2E2;WWP2;PIAS2;PML;UBOX5;ITCH;TRAF6;MDM2;UBA3;ANAPC5;UBA1;BIRC6;TRIM37;TRIP12;SAE1;UBE2K;BIRC2
Endocytosis	64/252	9.00877e-07	6.04533	0.000136933	0	0	2.12572	29.5899	WASHC4;TFRC;SH3KBP1;WIPF2;ARPC5L;CBLB;ARRB1;WASL;PSD3;GIT1;AP2M1;ACTR3;SH3GLB2;USP8;IST1;VPS37A;ARAP1;ARFGAP3;ARFGAP1;DNM1;EPN1;RNF41;DNM2;EPN2;TGFBR2;DNM3;ACAP2;ZFYVE16;BIN1;HGS;PARD3;TRAF6;RUFY2;CHMP3;TSG101;SRC;NEDD4L;VPS26A;AGAP3;PLD2;CYTH3;RAB11FIP1;SNX2;GRK2;PIP5K1A;SNX5;SNX6;SMAD2;ARFGEF1;ARFGEF2;SMURF2;VTA1;SNF8;STAM;AP2B1;RAB11A;PML;ITCH;DAB2;ARPC3;MDM2;FGFR3;FGFR2;SPG21
Adherens junction	23/71	5.83794e-05	4.23374	0.00591578	0	0	2.97198	28.9725	PTPN1;TCF7L2;YES1;CSNK2A1;SRC;ACTN1;INSR;CTNND1;CSNK2A2;LEF1;LMO7;WASL;SORBS1;BAIAP2;TGFBR2;AFDN;PARD3;FYN;NECTIN4;MET;SSX2IP;NECTIN2;FGFR1
Phosphatidylinositol signaling system	28/97	9.94031e-05	4.0026	0.00755464	0	0	2.51838	23.2102	IPPK;PI4K2B;MTMR2;DGKD;INPP1;MTMR14;INPPL1;ITPR1;CALML4;PIK3C2A;MTM1;PIP4P2;PIP4P1;PPIP5K1;PPIP5K2;PIP4K2A;PIP5K1A;PLCG1;IP6K1;IP6K2;IPMK;INPP4A;ITPKC;PLCB3;PIKFYVE;PLCB4;CALM2;DGKH
Lysine degradation	19/63	0.000688583	3.16204	0.0418659	0	0	2.67506	19.4768	KMT2E;SUV39H2;SETD2;EHMT2;KMT2C;DOT1L;KMT2B;EHMT1;DLST;PLOD2;PRDM2;ACAT1;NSD3;TMLHE;MECOM;NSD2;KMT5B;KMT5A;EZH2
Notch signaling pathway	17/59	0.0022394	2.64987	0.113463	0	0	2.50593	15.2901	JAG2;HDAC2;TLE1;CTBP2;DTX2;DTX3;RBPJ;TLE6;NCOR2;KAT2B;ADAM17;APH1B;ATXN1;ATXN1L;DVL1;NUMB;DVL3
Glucagon signaling pathway	26/107	0.00286218	2.5433	0.1243	0	0	1.98922	11.6492	ATF2;CRTC2;PRKAA1;ITPR1;SLC2A1;PRKAG2;CALML4;ACACA;LDHA;PPP3CB;PPP4C;PPP3CC;AKT2;PHKG2;CAMK2G;PHKA1;PPP4R3A;PHKB;PPP4R3B;PLCB3;CREB1;PKM;PLCB4;GNAS;CALM2;PFKP
Inositol phosphate metabolism	19/73	0.00451406	2.34543	0.171534	0	0	2.17841	11.7646	IPPK;PI4K2B;MTMR2;TPI1;INPP1;MTMR14;IPMK;INPPL1;PIK3C2A;MTM1;INPP4A;ITPKC;MINPP1;PLCB3;PIKFYVE;PLCB4;PIP4K2A;PIP5K1A;PLCG1
Fanconi anemia pathway	15/54	0.00578277	2.23786	0.195329	0	0	2.3799	12.2633	TOP3B;CENPX;POLN;REV1;MLH1;PALB2;SLX4;RAD51;FANCD2;ERCC1;USP1;POLI;PMS2;POLK;ATR
HIF-1 signaling pathway	25/109	0.00750564	2.12461	0.228172	0	0	1.84341	9.01814	TFRC;CUL2;SLC2A1;ENO1;ENO2;LDHA;AKT2;MKNK1;MKNK2;PGK1;PLCG1;ELOC;CAMK2G;EIF4E;PDK1;EGLN1;IFNGR1;INSR;ARNT;NFKB1;VEGFA;RPS6KB1;ALDOA;GAPDH;PFKP
RNA degradation	19/79	0.0110348	1.95724	0.279501	0	0	1.95988	8.8326	TTC37;DIS3;WDR61;ENO1;ENO2;LSM5;TENT4B;LSM2;CNOT4;PAN2;LSM7;LSM6;PAN3;CNOT2;EXOSC8;DCP1A;CNOT9;EXOSC1;PFKP
Cell cycle	27/124	0.0114126	1.94261	0.279501	0	0	1.724	7.71151	RB1;HDAC2;CCNH;CDC14A;ORC6;CDC26;CHEK2;ORC3;ORC2;SKP2;E2F5;SMAD2;CDC7;YWHAZ;CCNA2;CDK7;STAG1;STAG2;TFDP1;TFDP2;CDK2;CDK1;MDM2;MCM4;ANAPC5;ATM;ATR
SNARE interactions in vesicular transport	1933-10-01	0.0119523	1.92255	0.279501	0	0	2.68799	11.8993	STX16;GOSR2;SNAP23;STX7;VTI1A;SEC22B;STX11;STX1A;VTI1B;BET1
Homologous recombination	1941-11-01	0.0218316	1.66091	0.436187	0	0	2.26676	8.669	BARD1;TOP3B;RAD51B;RAD52;RAD51;ABRAXAS1;XRCC2;ATM;NBN;PALB2;RAD54B
Circadian rhythm	1931-09-01	0.0221891	1.65386	0.436187	0	0	2.52839	9.6285	PRKAA1;CREB1;PER3;FBXW11;BHLHE40;PRKAG2;CSNK1D;BTRC;CLOCK
Yersinia infection	28/137	0.0229572	1.63908	0.436187	0	0	1.59048	6.00268	ROCK2;SRC;WIPF2;ARHGEF28;ARPC5L;WASL;RPS6KA3;MAPK9;IRAK1;AKT2;PIP5K1A;PLCG1;MAP2K3;ACTR3;MAP2K4;ARHGEF12;CHUK;LIMK1;NFATC3;NFATC2;BAIAP2;NFKB1;PTK2;MAPK12;ARPC3;TRAF6;TAB2;CRK
Salmonella infection	46/249	0.0269967	1.56869	0.44064	0	0	1.40445	5.07292	HSP90AB1;AHNAK;DCTN2;ROCK2;CSE1L;LEF1;ARPC5L;WASL;KLC1;PIK3C2A;CYTH3;KLC4;MAPK9;ACTR1B;CASP8;IRAK1;AKT2;FLNA;FLNB;FLNC;PAK3;VPS39;VPS16;DYNC2H1;MAP2K3;ACTR3;MAP2K4;TCF7L2;CHUK;RIPK2;NFKB1;MAPK12;DNM2;MYLPF;ARPC3;TRAF6;ABI1;VPS41;TAB3;TAB2;EXOC5;RAB7B;TLR5;GAPDH;ARL8A;BIRC2
Endocrine and other factor-regulated calcium reabsorption	13/53	0.0275609	1.55971	0.44064	0	0	2.00945	7.21666	VDR;ATP2B4;PTH1R;AP2B1;DNM1;RAB11A;DNM2;DNM3;PLCB3;PLCB4;BDKRB2;GNAS;AP2M1
C-type lectin receptor signaling pathway	22/104	0.0284155	1.54644	0.44064	0	0	1.66016	5.91153	ARHGEF12;CHUK;SYK;SRC;ITPR1;NFATC3;NFATC2;CBLB;CALML4;NFKB1;MALT1;MAPK12;RELB;CYLD;MAPK9;PPP3CB;CASP8;PPP3CC;AKT2;MDM2;CALM2;IKBKE
Human T-cell leukemia virus 1 infection	41/219	0.0289895	1.53776	0.44064	0	0	1.4271	5.05311	RB1;ATF2;VAC14;CRTC2;CRTC1;SLC2A1;XIAP;RELB;ELK4;POLB;MAPK9;PPP3CB;PPP3CC;KAT5;AKT2;CDC26;CHEK2;TSPO;SMAD2;IL15RA;STAT5B;MAP2K4;RANBP3;CHUK;IL1R1;NFYB;NFATC3;NFATC2;NFKB1;TGFBR2;FOSL1;CCNA2;KAT2B;CREB1;CANX;CDK2;VDAC1;ATM;ANAPC5;TCF3;ATR
Protein processing in endoplasmic reticulum	33/171	0.0316132	1.50013	0.456869	0	0	1.48075	5.11478	HSP90AB1;SAR1A;TUSC3;SAR1B;UBE2J2;SEC61A2;ATXN3;ERLEC1;MAPK9;HSPH1;BAG2;OS9;BAG1;UBQLN1;UGGT2;SIL1;SEC23B;SEC63;SEC31A;MBTPS1;SEC24B;SEC24A;EDEM1;EIF2AK4;ERN1;NSFL1C;CANX;ERP29;PREB;STT3B;MAN1B1;RNF185;MBTPS2
Shigellosis	45/246	0.0330629	1.48066	0.456869	0	0	1.38724	4.72959	ROCK2;SRC;ARPC5L;ITPR1;U2AF1;WASL;MALT1;CYTH3;MAPK9;RPS6KA5;AKT2;TIFA;PLCG1;BTRC;ATG5;CAST;ACTR3;CHUK;IL1R1;RIPK2;FBXW11;CBX3;ACTN1;BNIP3;PTK2;NFKB1;MAPK12;MYLPF;DIAPH1;PLCB3;PLCB4;CTTN;RPS6KB1;ARPC3;TRAF6;UBE2V2;MDM2;TAB3;VDAC1;ATM;TAB2;TLR5;CRK;TECPR1;CD44
Various types of N-glycan biosynthesis	1939-10-01	0.0377274	1.42334	0.484561	0	0	2.13111	6.98443	B4GALT2;ALG9;TUSC3;MGAT4B;ALG14;ALG3;MGAT1;ALG1;MAN1B1;STT3B
Insulin signaling pathway	27/137	0.0382548	1.41731	0.484561	0	0	1.5191	4.95756	PRKAA1;SHC1;INPPL1;PRKAG2;CBLB;CALML4;ACACA;PPP1CB;MAPK9;AKT2;MKNK1;MKNK2;PHKG2;FLOT1;FLOT2;EIF4E;PTPN1;INSR;PHKA1;TSC1;BRAF;PHKB;SORBS1;RPS6KB1;CALM2;CRK;RHOQ
MAPK signaling pathway	52/294	0.0408544	1.38876	0.496789	0	0	1.33163	4.25822	ATF2;ARRB1;ECSIT;ELK4;RPS6KA3;PPP3CB;RPS6KA5;PPP3CC;MECOM;AKT2;STMN1;MAP2K3;MAP2K4;CHUK;IL1R1;MAPK8IP3;TGFBR2;PPM1B;TRAF6;MAPKAPK5;CRK;MET;MAX;CACNA1C;EFNA5;RELB;RAP1B;MAPK9;IRAK1;MKNK1;MKNK2;FLNA;FLNB;FLNC;MAP4K3;MAP2K5;MAP4K4;MAP3K2;INSR;NFATC3;BRAF;GNG12;NFKB1;MAPK12;VEGFA;TAOK1;NF1;FAS;TAB2;FGFR3;FGFR2;FGFR1
Mitophagy	15/68	0.0454926	1.34206	0.531914	0	0	1.74982	5.40731	USP8;USP15;CSNK2A1;SRC;BNIP3;ATG9A;CSNK2A2;AMBRA1;BCL2L13;MAPK9;RHOT1;NBR1;RAB7B;OPTN;ATG5
Glycerophospholipid metabolism	20/98	0.049439	1.30593	0.556647	0	0	1.58586	4.76869	DGKD;LPGAT1;CHKA;MBOAT1;MBOAT2;PLA2G6;GPCPD1;CRLS1;SELENOI;PISD;PLD2;PGS1;PTDSS2;PHOSPHO1;PLPP5;GPAM;GPAT3;CHPT1;PLPP1;DGKH
Viral carcinogenesis	37/203	0.0516219	1.28717	0.560467	0	0	1.37994	4.08987	RB1;HDAC4;ATF2;HDAC5;VAC14;HDAC2;SRC;UBR4;UBE3A;RBPJ;HDAC8;GTF2E2;HDAC7;POLB;CASP8;SKP2;STAT5B;GSN;SYK;ACTN1;MRPS18B;SCRIB;YWHAZ;SND1;NFKB1;CCNA2;KAT2B;CREB1;PKM;TRAF3;DNAJA3;CDK2;REL;CDK1;MDM2;ATP6V0D1;IL6ST
Epithelial cell signaling in Helicobacter pylori infection	15/70	0.0567751	1.24584	0.595093	0	0	1.686	4.83654	ATP6V1A;MAP2K4;ATP6V0B;ATP6AP1;CHUK;SRC;MAPK12;NFKB1;MAPK9;ADAM17;ATP6V1H;PLCG1;ATP6V0D1;MET;GIT1
Spinocerebellar ataxia	27/143	0.0605058	1.2182	0.595093	0	0	1.44002	4.03928	PSMD14;ITPR1;OMA1;VLDLR;AMBRA1;RBPJ;ATXN3;MAPK9;ATXN2;ATXN1;KAT5;OPA1;AKT2;ATXN1L;NOP56;NFYA;PUM1;PUM2;ERN1;PSMA5;PLCB3;PSMA3;PLCB4;PSMC6;PSMA2;ULK2;VDAC1
Hepatitis B	30/162	0.0620373	1.20735	0.595093	0	0	1.40629	3.90952	RB1;ATF2;SRC;MAPK9;CASP8;IRAK1;AKT2;JAK2;IKBKE;MAP2K3;MAP2K4;STAT5B;APAF1;ATP6AP1;CHUK;NFATC3;NFATC2;BRAF;TYK2;YWHAZ;NFKB1;MAPK12;TGFBR2;CCNA2;CREB1;TRAF3;TRAF6;CDK2;FAS;TAB2
Cellular senescence	29/156	0.0630319	1.20044	0.595093	0	0	1.41284	3.90524	RB1;ITPR1;CALML4;LIN9;PPP1CB;PPP3CB;PPP3CC;AKT2;CHEK2;NBN;BTRC;E2F5;MAP2K3;SMAD2;FBXW11;NFATC3;NFATC2;TSC1;NFKB1;MAPK12;TGFBR2;CCNA2;CDK2;CDK1;MDM2;VDAC1;ATM;CALM2;ATR
PD-L1 expression and PD-1 checkpoint pathway in cancer	18/89	0.0645989	1.18977	0.595093	0	0	1.5675	4.29424	MAP2K3;CD274;CHUK;CSNK2A1;IFNGR1;CSNK2A2;NFATC3;NFATC2;MAPK12;NFKB1;EML4;PPP3CB;PPP3CC;RPS6KB1;AKT2;TRAF6;PLCG1;JAK2
Dopaminergic synapse	25/132	0.0667542	1.17552	0.596861	0	0	1.44522	3.91183	ATF2;ITPR1;PPP2R2A;ARRB1;CALML4;CACNA1C;COMT;PPP1CB;MAPK9;PPP3CB;PPP3CC;AKT2;CAMK2G;GNG12;MAPK12;PLCB3;CREB1;PLCB4;GNB2;GNB1;PPP2R2D;GNAS;GNB4;CLOCK;CALM2
Wnt signaling pathway	30/166	0.0802116	1.09576	0.650339	0	0	1.36461	3.44303	CTBP2;ROCK2;LEF1;MAPK9;PORCN;PPP3CB;PPP3CC;DVL1;DVL3;TBL1X;BTRC;CAMK2G;WNT10B;TCF7L2;TLE1;CSNK2A1;FBXW11;CSNK2A2;NFATC3;NFATC2;SENP2;TLE6;FOSL1;VANGL1;PLCB3;PLCB4;DAAM1;APC;TBL1XR1;NOTUM
N-Glycan biosynthesis	1950-11-01	0.0805039	1.09418	0.650339	0	0	1.74275	4.39077	B4GALT2;ALG9;ALG6;TUSC3;MGAT4B;ALG14;ALG3;MGAT1;ALG1;MAN1B1;STT3B
NF-kappa B signaling pathway	20/104	0.0823996	1.08407	0.650339	0	0	1.47206	3.67453	UBE2I;CSNK2A1;CHUK;SYK;IL1R1;CSNK2A2;XIAP;NFKB1;MALT1;RELB;CYLD;IRAK1;TRAF3;TRAF6;TAB3;ATM;TAB2;PLCG1;ERC1;BIRC2
Transcriptional misregulation in cancer	34/192	0.0829994	1.08093	0.650339	0	0	1.33143	3.31382	ATF1;DDX5;HDAC2;CCNT2;CCNT1;MAX;DOT1L;JMJD1C;AFF1;ELK4;SIN3A;NSD2;POLK;KDM6A;SS18;TAF15;EYA1;ASPSCR1;RUNX2;NFKB1;PTK2;PML;TGFBR2;CCNA2;NCOR1;ZEB1;EWSR1;MDM2;REL;RARA;ATM;TCF3;MET;BIRC2
mTOR signaling pathway	28/154	0.0834316	1.07867	0.650339	0	0	1.37453	3.41395	ATP6V1A;PRKAA1;CAB39;MAPKAP1;NPRL3;RPS6KA3;FLCN;AKT2;DVL1;ATP6V1H;DVL3;RICTOR;SKP2;RNF152;EIF4E;FNIP2;WNT10B;CHUK;MIOS;STRADA;INSR;STRADB;TSC1;BRAF;SLC7A5;RPS6KB1;ULK2;LAMTOR2
Kaposi sarcoma-associated herpesvirus infection	34/193	0.0877979	1.05652	0.652092	0	0	1.32298	3.21843	RB1;SRC;LEF1;ITPR1;CALML4;PIK3R5;MAPK9;PPP3CB;PPP3CC;CASP8;AKT2;PLCG1;JAK2;IKBKE;MAP2K4;TCF7L2;SYK;CHUK;IFNGR1;NFATC3;NFATC2;TYK2;GNG12;NFKB1;MAPK12;VEGFA;CREB1;TRAF3;GNB2;GNB1;GNB4;FAS;IL6ST;CALM2
Basal transcription factors	1945-10-01	0.0879466	1.05578	0.652092	0	0	1.76516	4.29115	TAF6L;CDK7;TAF15;CCNH;TAF11;GTF2IRD1;GTF2F2;GTF2E2;TAF2;GTF2I
Spliceosome	27/150	0.0965158	1.0154	0.69859	0	0	1.35751	3.17393	TCERG1;DDX5;RBM25;SRSF1;HNRNPU;U2AF1;PUF60;TXNL4A;HNRNPA1;SRSF10;BCAS2;RBM17;PRPF38B;PRPF40B;LSM5;U2SURP;LSM2;LSM7;LSM6;PRPF18;PRPF3;SRSF3;SRSF5;HNRNPC;SRSF6;SRSF7;SLU7
Lipid and atherosclerosis	37/215	0.101176	0.994923	0.715289	0	0	1.286	2.94609	HSP90AB1;ROCK2;SRC;ITPR1;CALML4;VLDLR;RAP1B;MAPK9;PPP3CB;PPP3CC;CASP8;IRAK1;AKT2;PLCG1;JAK2;IKBKE;CAMK2G;MAP2K3;MAP2K4;POU2F1;APAF1;CHUK;HSPA4;NFATC3;NFATC2;SOD2;PTK2;NFKB1;MAPK12;ERN1;PLCB3;PLCB4;TRAF3;TRAF6;FAS;TAB2;CALM2
Chagas disease	19/102	0.113009	0.946886	0.748045	0	0	1.41488	3.08485	SMAD2;MAP2K4;CHUK;IFNGR1;PPP2R2A;NFKB1;MAPK12;TGFBR2;MAPK9;PLCB3;CASP8;PLCB4;IRAK1;AKT2;TRAF6;PPP2R2D;GNAS;BDKRB2;FAS
Citrate cycle (TCA cycle)	2023-07-30	0.11469	0.940474	0.748045	0	0	1.87956	4.07023	IDH2;OGDH;DLST;OGDHL;SDHC;ACO2;IDH3A
Regulation of actin cytoskeleton	37/218	0.117304	0.930687	0.748045	0	0	1.26446	2.70973	ROCK2;SRC;ARPC5L;WASL;SLC9A1;PPP1CB;BDKRB2;PIP4K2A;PIP5K1A;ITGB8;PAK3;GIT1;ACTR3;GSN;ARHGEF12;PPP1R12A;ACTN1;LIMK1;BRAF;GNG12;BAIAP2;PTK2;SSH1;MYLPF;TIAM1;DIAPH1;PIKFYVE;DIAPH3;ABI2;APC;ARPC3;ITGA6;PPP1R12B;FGFR3;CRK;FGFR2;FGFR1
Human immunodeficiency virus 1 infection	36/212	0.120314	0.919683	0.748045	0	0	1.26515	2.67915	ITPR1;CALML4;SAMHD1;MAPK9;PPP3CB;PPP3CC;CASP8;IRAK1;AP1G1;AKT2;PLCG1;ELOC;BTRC;PAK3;MAP2K3;CHUK;FBXW11;LIMK1;NFATC3;NFATC2;GNG12;PTK2;NFKB1;MAPK12;RPS6KB1;GNB2;TRAF6;GNB1;CDK1;GNB4;FAS;ATM;TAB2;CALM2;CRK;ATR
Amino sugar and nucleotide sugar metabolism	1948-10-01	0.123448	0.908518	0.748045	0	0	1.62552	3.40049	CYB5R1;CYB5R4;CMAS;GNPDA1;UXS1;AMDHD2;FPGT;GMPPA;GNPNAT1;UAP1
Fc gamma R-mediated phagocytosis	18/97	0.123699	0.907632	0.748045	0	0	1.4081	2.9428	VASP;ACTR3;GSN;SYK;LIMK1;ARPC5L;INPPL1;PLA2G6;PLD2;DNM2;RPS6KB1;BIN1;ARPC3;AKT2;PIP5K1A;PLCG1;CRK;PLPP1
Long-term potentiation	13/67	0.133983	0.872952	0.748045	0	0	1.48727	2.98948	ITPR1;BRAF;CALML4;CACNA1C;PPP1CB;RAP1B;RPS6KA3;PPP3CB;PLCB3;PPP3CC;PLCB4;CAMK2G;CALM2
Tight junction	29/169	0.136947	0.863448	0.748045	0	0	1.28067	2.54618	PRKAA1;ROCK2;SRC;ARPC5L;NEDD4L;PRKAG2;PPP2R2A;ARHGAP17;YBX3;MAPK9;MAGI1;VASP;ACTR3;HSPA4;ACTN1;SCRIB;TJAP1;TIAM1;AFDN;MYL6;CTTN;ARPC3;PARD3;PPP2R2D;RAB13;AMOTL2;NF2;RAPGEF6;LLGL2
Pathways in cancer	83/531	0.142766	0.845376	0.748045	0	0	1.1472	2.23307	RB1;HSP90AB1;SLC2A1;CALML4;RASSF1;RPS6KA5;CASP8;MECOM;AKT2;BDKRB2;ELOC;PIM2;POLK;JAK2;SKP2;APPL1;ARHGEF11;IL15RA;RALBP1;ARHGEF12;GSTO2;APAF1;CHUK;IFNGR1;PLEKHG5;NCOA3;NCOA4;ARNT;TGFBR2;EML4;CCNA2;PLCB3;PLCB4;TRAF3;TRAF6;RARA;RARB;ITGA6;IL6ST;CRK;MET;BIRC2;HDAC2;CTBP2;MAX;ROCK2;CUL2;LEF1;MGST2;XIAP;PLD2;MAPK9;DVL1;DVL3;PLCG1;CAMK2G;JAG2;EGLN1;SMAD2;WNT10B;STAT5B;TCF7L2;BRAF;GNG12;MLH1;NFKB1;PML;PT…
Glycosylphosphatidylinositol (GPI)-anchor biosynthesis	2023-06-26	0.144454	0.840271	0.748045	0	0	1.85237	3.58396	PIGB;PIGT;PIGN;PIGQ;PIGV;PIGX
D-Glutamine and D-glutamate metabolism	2023-02-05	0.145758	0.836369	0.748045	0	0	4.11454	7.92382	GLUD1;GLS
Hedgehog signaling pathway	1956-11-01	0.149581	0.825124	0.748045	0	0	1.50986	2.8686	CSNK1G3;GRK2;SMURF2;FBXW11;CUL3;IQCE;ARRB1;CSNK1D;BTRC;DISP1;CSNK1G1
Pathogenic Escherichia coli infection	33/197	0.150025	0.823836	0.748045	0	0	1.2441	2.36	ROCK2;SRC;WIPF2;ARPC5L;WASL;CYTH3;MAPK9;CASP8;IRAK1;FYN;PAK3;ACTR3;ARHGEF11;SEC24B;ARHGEF12;SEC24A;CHUK;IL1R1;MYO5A;BAIAP2;NFKB1;MAPK12;MYO1B;CTTN;ARPC3;TRAF6;ABI1;FAS;TAB3;TAB2;TMBIM6;TLR5;GAPDH
Neurotrophin signaling pathway	21/119	0.150495	0.822477	0.748045	0	0	1.32425	2.5079	SHC1;RIPK2;KIDINS220;FRS2;BRAF;CALML4;NFKB1;MAPK12;RAP1B;RPS6KA3;MAPK9;RPS6KA5;IRAK1;AKT2;TRAF6;PLCG1;CALM2;CRK;CAMK2G;MAP2K5;SH2B1
Renal cell carcinoma	13/69	0.15793	0.801536	0.748045	0	0	1.43399	2.64657	EGLN1;CUL2;SLC2A1;ARNT;BRAF;VEGFA;RAP1B;FLCN;AKT2;ELOC;PAK3;CRK;MET
Th17 cell differentiation	19/107	0.15831	0.800491	0.748045	0	0	1.3341	2.45902	SMAD2;STAT5B;HSP90AB1;CHUK;IL1R1;IFNGR1;NFATC3;NFATC2;TYK2;NFKB1;MAPK12;TGFBR2;MAPK9;PPP3CB;PPP3CC;RARA;PLCG1;IL6ST;JAK2
Pantothenate and CoA biosynthesis	2023-05-21	0.158959	0.798714	0.748045	0	0	1.92931	3.54821	PANK2;BCAT1;COASY;PPCDC;AASDHPPT
AMPK signaling pathway	21/120	0.159751	0.796556	0.748045	0	0	1.3108	2.40419	RAB2A;PFKFB2;CRTC2;PRKAA1;CAB39;STRADA;INSR;STRADB;PRKAG2;PPP2R2A;TSC1;ELAVL1;ACACA;CAMKK2;CCNA2;EEF2K;CREB1;RPS6KB1;AKT2;PPP2R2D;PFKP
Legionellosis	1957-11-01	0.163396	0.786758	0.748045	0	0	1.47695	2.6756	CLK1;BCL2L13;CASP8;APAF1;SAR1A;SAR1B;BNIP3;SEC22B;TLR5;CLK4;NFKB1
Thermogenesis	38/232	0.163409	0.786723	0.748045	0	0	1.21113	2.19396	ATF2;COX19;COX7B;KDM3A;PRKAA1;KDM3B;KDM1A;NDUFB10;NDUFB5;COX18;COX4I1;PRKAG2;UQCRH;RPS6KA3;DPF1;NDUFV3;MAP2K3;SMARCC1;NDUFA7;NDUFA5;NDUFA4;NDUFA3;FRS2;SDHC;TSC1;ARID1A;SMARCA2;ARID1B;MAPK12;COX6B1;CREB1;NDUFAF6;NDUFS7;RPS6KB1;NDUFS4;NDUFAF2;GNAS;FGFR1
Osteoclast differentiation	22/127	0.164783	0.783088	0.748045	0	0	1.29476	2.33462	CHUK;SYK;IL1R1;IFNGR1;NFATC2;TYK2;NFKB1;MAPK12;FOSL2;TGFBR2;RELB;FOSL1;CYLD;MAPK9;PPP3CB;PPP3CC;CREB1;TEC;AKT2;TRAF6;TAB2;FYN
RNA transport	31/186	0.165911	0.780126	0.748045	0	0	1.23632	2.2208	EIF4A2;FMR1;GEMIN2;POP4;NMD3;NXT2;FXR1;SUMO1;TGS1;SUMO2;SAP18;EIF4E;NDC1;UBE2I;PYM1;UPF3B;NUP153;RANGAP1;SENP2;THOC7;SRRM1;EIF3I;RPP21;TACC3;NUP35;RNPS1;GEMIN7;NUP98;EIF4G3;EIF4G2;EIF4G1
Chronic myeloid leukemia	14/76	0.166969	0.777363	0.748045	0	0	1.39486	2.49672	RB1;STAT5B;HDAC2;CHUK;CTBP2;SHC1;BRAF;NFKB1;TGFBR2;MECOM;AKT2;MDM2;POLK;CRK
Pancreatic cancer	14/76	0.166969	0.777363	0.748045	0	0	1.39486	2.49672	RB1;SMAD2;RALBP1;CHUK;BRAF;NFKB1;TGFBR2;PLD2;VEGFA;MAPK9;RAD51;RPS6KB1;AKT2;POLK
Glycosphingolipid biosynthesis	1945-09-01	0.167326	0.776437	0.748045	0	0	1.54387	2.76015	B4GALT2;GLB1;SLC33A1;GCNT2;NAGA;B4GALNT1;ST3GAL6;ST3GAL2;ST6GALNAC6
Central carbon metabolism in cancer	13/70	0.17068	0.767818	0.751981	0	0	1.40875	2.49061	IDH2;SLC2A1;GLS;SLC7A5;LDHA;PKM;AKT2;MET;FGFR3;FGFR2;PFKP;PDK1;FGFR1
Lysosome	22/128	0.174238	0.758858	0.756689	0	0	1.28247	2.24091	CTSA;ATP6V0B;ASAH1;ATP6AP1;IDUA;GBA;AP4E1;AP3D1;CTNS;NAGA;AP3B1;CLN5;GALC;AP3M1;LAPTM4A;GNPTAB;AP1G1;GLB1;ATP6V1H;AP4S1;PPT2;ATP6V0D1
Bacterial invasion of epithelial cells	14/77	0.179482	0.74598	0.767949	0	0	1.37264	2.35776	ACTR3;SHC1;SRC;ARPC5L;WASL;DNM1;PTK2;DNM2;DNM3;ARHGAP10;CTTN;ARPC3;CRK;MET
Non-alcoholic fatty liver disease	26/155	0.181883	0.740209	0.767949	0	0	1.24554	2.1229	COX7B;PRKAA1;NDUFB10;NDUFB5;COX4I1;PRKAG2;UQCRH;MAPK9;CASP8;AKT2;MLX;NDUFV3;NDUFA7;NDUFA5;NDUFA4;INSR;NDUFA3;SDHC;NFKB1;MAPK12;COX6B1;ERN1;ITCH;NDUFS7;NDUFS4;FAS
Hippo signaling pathway	27/163	0.194459	0.711173	0.795226	0	0	1.22682	2.00895	LEF1;PPP2R2A;PPP1CB;RASSF1;DVL1;DVL3;BTRC;TEAD1;SMAD2;TEAD4;WNT10B;TCF7L2;FBXW11;CSNK1D;SCRIB;YWHAZ;SMAD7;TGFBR2;LATS1;FRMD6;APC;PARD3;PPP2R2D;NF2;BIRC2;LLGL2;BMPR1A
Phosphonate and phosphinate metabolism	2023-02-06	0.199108	0.700911	0.795226	0	0	3.08572	4.98007	CHPT1;SELENOI
ErbB signaling pathway	15/85	0.200037	0.69889	0.795226	0	0	1.32355	2.12993	MAP2K4;STAT5B;SHC1;SRC;CBLB;BRAF;PTK2;MAPK9;RPS6KB1;AKT2;ABL2;PLCG1;PAK3;CRK;CAMK2G
Bladder cancer	1941-08-01	0.204978	0.688292	0.795226	0	0	1.49681	2.37222	RB1;RASSF1;RPS6KA5;SRC;MDM2;BRAF;FGFR3;VEGFA
Small cell lung cancer	16/92	0.20686	0.684323	0.795226	0	0	1.30035	2.04897	RB1;APAF1;CHUK;MAX;XIAP;NFKB1;PTK2;TRAF3;AKT2;TRAF6;CDK2;RARB;ITGA6;POLK;SKP2;BIRC2
Nicotinate and nicotinamide metabolism	1935-07-01	0.208009	0.681917	0.795226	0	0	1.54348	2.42353	NADK2;NNT;NMRK1;NAMPT;SIRT7;NADK;SIRT2
Protein export	2023-05-23	0.20941	0.679002	0.795226	0	0	1.71474	2.68093	SEC61A2;SRP19;SPCS3;SRP9;SEC63
p53 signaling pathway	13/73	0.211807	0.67406	0.795226	0	0	1.33807	2.0768	CD82;APAF1;SIVA1;COP1;CASP8;CHEK2;CDK2;CDK1;MDM2;FAS;ATM;MDM4;ATR
Proteoglycans in cancer	33/205	0.211886	0.673898	0.795226	0	0	1.18568	1.83983	DDX5;ROCK2;SRC;ITPR1;SLC9A1;PPP1CB;AKT2;FLNA;FLNB;PLCG1;FLNC;CAMK2G;SMAD2;WNT10B;ARHGEF12;PPP1R12A;FRS2;BRAF;ANK3;PTK2;MAPK12;VEGFA;TIAM1;CTTN;RPS6KB1;MDM2;SDC1;FAS;HPSE;PPP1R12B;MET;CD44;FGFR1
Acute myeloid leukemia	1967-12-01	0.218002	0.661539	0.808204	0	0	1.34734	2.05233	CCNA2;STAT5B;TCF7L2;CHUK;RPS6KB1;AKT2;LEF1;RARA;BRAF;PIM2;NFKB1;PML
cGMP-PKG signaling pathway	27/167	0.232266	0.634014	0.850709	0	0	1.19148	1.73941	ATF2;ROCK2;ITPR1;CALML4;CACNA1C;PIK3R5;PPP1CB;PPP3CB;PPP3CC;AKT2;BDKRB2;MEF2D;GTF2I;VASP;PPP1R12A;INSR;PDE2A;NFATC3;ATP2B4;NFATC2;KCNU1;PLCB3;CREB1;PLCB4;VDAC1;GTF2IRD1;CALM2
Sphingolipid metabolism	1949-09-01	0.237755	0.62387	0.860447	0	0	1.38916	1.99555	GALC;UGCG;CERS5;ASAH1;SMPD4;SGMS1;GLB1;GBA;PLPP1
Amphetamine addiction	1969-12-01	0.249406	0.603092	0.888415	0	0	1.29991	1.80515	PPP1CB;ATF2;PPP3CB;HDAC2;PPP3CC;CREB1;GNAS;CALML4;CACNA1C;CAMK2G;CALM2;STX1A
Longevity regulating pathway	17/102	0.251328	0.599759	0.888415	0	0	1.23512	1.7057	ATF2;HDAC2;PRKAA1;EHMT2;INSR;EHMT1;PRKAG2;TSC1;SOD2;NFKB1;CAMKK2;CREB1;RPS6KB1;AKT2;EIF4E;ATG5;APPL1
Vibrio cholerae infection	1950-09-01	0.256828	0.590358	0.897422	0	0	1.3552	1.84219	SEC61A2;ATP6V1A;ATP6V0B;ATP6AP1;GNAS;ATP6V1H;KDELR3;PLCG1;ATP6V0D1
Human cytomegalovirus infection	35/225	0.268716	0.570706	0.928292	0	0	1.13803	1.49548	RB1;ATF2;ROCK2;SRC;ITPR1;CALML4;AKAP13;PPP3CB;PPP3CC;CASP8;AKT2;ARHGEF11;ARHGEF12;CHUK;IL1R1;NFATC3;NFATC2;TSC1;GNG12;PTK2;NFKB1;MAPK12;VEGFA;PLCB3;PLCB4;CREB1;RPS6KB1;GNB2;GNB1;GNAS;GNB4;MDM2;FAS;CALM2;CRK
Inflammatory mediator regulation of TRP channels	16/98	0.288013	0.540588	0.966164	0	0	1.20478	1.49964	MAP2K3;IL1R1;SRC;ITPR1;CALML4;PLA2G6;MAPK12;PPP1CB;MAPK9;PLCB3;PLCB4;GNAS;BDKRB2;PLCG1;CALM2;CAMK2G
Fluid shear stress and atherosclerosis	22/139	0.294827	0.530432	0.966164	0	0	1.16115	1.41819	ACVR1;MAP2K4;PRKAA1;HSP90AB1;CHUK;GSTO2;IL1R1;SRC;MGST2;CALML4;NFKB1;PTK2;MAPK12;VEGFA;MAPK9;SUMO1;AKT2;SUMO2;SDC1;CALM2;MAP2K5;BMPR1A
TNF signaling pathway	18/112	0.295702	0.529145	0.966164	0	0	1.18237	1.4406	MAP2K3;ATF2;MAP2K4;CHUK;NFKB1;MAPK12;MAPK9;ITCH;RPS6KA5;CASP8;CREB1;TRAF3;AKT2;TAB3;FAS;TAB2;DNM1L;BIRC2
Tuberculosis	28/180	0.296315	0.528247	0.966164	0	0	1.13768	1.38379	SRC;CALML4;MALT1;MAPK9;PPP3CB;CASP8;PPP3CC;IRAK1;AKT2;ATP6V1H;JAK2;CAMK2G;ATP6V0B;ARHGEF12;APAF1;ATP6AP1;SYK;NFYA;VDR;IFNGR1;RIPK2;NFYB;NFKB1;MAPK12;CREB1;TRAF6;ATP6V0D1;CALM2
Th1 and Th2 cell differentiation	15/92	0.298376	0.525236	0.966164	0	0	1.20274	1.45459	JAG2;STAT5B;CHUK;IFNGR1;NFATC3;NFATC2;TYK2;RBPJ;MAPK12;NFKB1;MAPK9;PPP3CB;PPP3CC;PLCG1;JAK2
Parathyroid hormone synthesis, secretion and action	17/106	0.306102	0.514133	0.966164	0	0	1.17934	1.39614	ARHGEF11;ATF2;VDR;ITPR1;BRAF;ARRB1;PTH1R;RUNX2;PLD2;AKAP13;PLCB3;CREB1;PLCB4;NACA;GNAS;MEF2D;FGFR1
Fructose and mannose metabolism	1933-06-01	0.30907	0.509943	0.966164	0	0	1.37157	1.61048	PFKFB2;TPI1;FPGT;GMPPA;ALDOA;PFKP
Oxytocin signaling pathway	24/154	0.311276	0.506855	0.966164	0	0	1.14	1.33046	PRKAA1;PPP1R12A;ROCK2;SRC;ITPR1;NFATC3;NFATC2;PRKAG2;CALML4;CACNA1C;PIK3R5;CAMKK2;PPP1CB;MYL6;PPP3CB;PLCB3;EEF2K;PPP3CC;PLCB4;GNAS;PPP1R12B;CALM2;CAMK2G;MAP2K5
Epstein-Barr virus infection	31/202	0.311282	0.506845	0.966164	0	0	1.11959	1.30662	RB1;HDAC2;PSMD14;RBPJ;RELB;MAPK9;CASP8;IRAK1;SIN3A;AKT2;POLK;SKP2;IKBKE;MAP2K3;MAP2K4;SYK;APAF1;CHUK;TYK2;NFKB1;MAPK12;NCOR2;CCNA2;PSMC6;TRAF3;TRAF6;CDK2;MDM2;FAS;TAB2;CD44
GnRH signaling pathway	15/93	0.313522	0.503732	0.966164	0	0	1.18725	1.37707	MAP2K3;MAP3K2;MAP2K4;SRC;ITPR1;CALML4;CACNA1C;MAPK12;PLD2;MAPK9;PLCB3;PLCB4;GNAS;CAMK2G;CALM2
Huntington disease	46/306	0.314639	0.502188	0.966164	0	0	1.09287	1.26372	COX7B;HDAC2;NDUFB10;PSMD14;DCTN2;NDUFB5;COX4I1;ITPR1;HTT;NRF1;AMBRA1;KLC1;UQCRH;KLC4;MAPK9;ACTR1B;CASP8;SIN3A;POLR2D;NDUFV3;AP2M1;NDUFA7;APAF1;NDUFA5;NDUFA4;NDUFA3;GPX8;SDHC;AP2B1;SOD2;COX6B1;PSMA5;ERN1;PLCB3;PSMA3;PLCB4;PSMC6;CREB1;NDUFS7;PSMA2;NDUFS4;ULK2;VDAC1;DNAL4;STX1A;DNAL1
Biosynthesis of unsaturated fatty acids	2023-05-27	0.321674	0.492584	0.97789	0	0	1.40264	1.5909	SCP2;ACOX1;TECR;HACD2;HACD4
IL-17 signaling pathway	15/94	0.328866	0.482981	0.989855	0	0	1.17215	1.30355	HSP90AB1;CHUK;SRSF1;ELAVL1;MAPK12;NFKB1;FOSL1;MAPK9;CASP8;TRAF3;TRAF6;TAB3;ANAPC5;TAB2;IKBKE
Propanoate metabolism	1934-06-01	0.33514	0.474773	0.998849	0	0	1.32251	1.44577	LDHA;PCCA;ACOX1;ECHDC1;ACACA;ACAT1
Relaxin signaling pathway	20/129	0.341219	0.466967	0.999996	0	0	1.13278	1.218	SMAD2;ATF2;MAP2K4;SHC1;SRC;ARRB1;GNG12;NFKB1;MAPK12;TGFBR2;VEGFA;MAPK9;PLCB3;CREB1;PLCB4;AKT2;GNB2;GNB1;GNAS;GNB4
Thiamine metabolism	2023-03-15	0.349801	0.456179	0.999996	0	0	1.5427	1.62044	TPK1;AK4;NTPCR
Peroxisome	13/82	0.354826	0.449985	0.999996	0	0	1.16293	1.20495	ABCD3;PEX11A;IDH2;PEX2;SOD2;PEX7;SLC25A17;SCP2;ACOX1;AGPS;PEX5;FAR1;HACL1
Autophagy	21/137	0.355974	0.448581	0.999996	0	0	1.11759	1.15435	UVRAG;PRKAA1;MTMR14;BNIP3;ATG9A;ITPR1;TSC1;EIF2AK4;AMBRA1;CAMKK2;ERN1;MAPK9;ATG16L2;RPS6KB1;AKT2;TRAF6;ATG4C;ULK2;ATG4A;RAB7B;ATG5
Terpenoid backbone biosynthesis	2023-04-22	0.369006	0.432966	0.999996	0	0	1.3713	1.36711	GGPS1;HMGCS1;ACAT1;PCYOX1
Alzheimer disease	54/369	0.373406	0.427818	0.999996	0	0	1.05858	1.0428	APP;COX7B;COX4I1;CALML4;PPP3CB;PPP3CC;CASP8;AKT2;CSNK2A1;APAF1;CHUK;CSNK2A2;SDHC;COX6B1;PSMA5;ERN1;PLCB3;PSMA3;ADAM17;PLCB4;NDUFS7;PSMA2;NDUFS4;ULK2;VDAC1;GAPDH;NDUFB10;PSMD14;NDUFB5;ITPR1;CACNA1C;AMBRA1;KLC1;RTN4;UQCRH;KLC4;MAPK9;APH1B;DVL1;DVL3;NAE1;NDUFV3;WNT10B;NDUFA7;NDUFA5;NDUFA4;INSR;NDUFA3;BRAF;NFKB1;PSMC6;APC;FAS;CALM2
Focal adhesion	30/201	0.374239	0.426851	0.999996	0	0	1.08308	1.06451	SHC1;ROCK2;SRC;TNC;XIAP;PPP1CB;RAP1B;MAPK9;AKT2;PIP5K1A;FLNA;ITGB8;FLNB;FYN;FLNC;PAK3;VASP;PPP1R12A;ACTN1;BRAF;PTK2;VEGFA;MYLPF;DIAPH1;COL6A3;ITGA6;PPP1R12B;CRK;MET;BIRC2
Ether lipid metabolism	1949-08-01	0.374534	0.426508	0.999996	0	0	1.20419	1.1826	AGPS;GDPD3;CHPT1;PLA2G6;PAFAH1B2;PLPP1;SELENOI;PLD2
Circadian entrainment	15/97	0.375823	0.425017	0.999996	0	0	1.12907	1.10495	ITPR1;CALML4;CACNA1C;GNG12;PLCB3;RPS6KA5;CREB1;PLCB4;PER3;GNB2;GNB1;GNAS;GNB4;CALM2;CAMK2G
Choline metabolism in cancer	15/98	0.391692	0.407055	0.999996	0	0	1.1154	1.04544	DGKD;SLC22A5;CHKA;SLC44A2;TSC1;GPCPD1;PLD2;MAPK9;RPS6KB1;AKT2;PIP5K1A;CHPT1;PLCG1;PLPP1;DGKH
Toxoplasmosis	17/112	0.393544	0.405007	0.999996	0	0	1.10447	1.02998	MAP2K3;CHUK;IFNGR1;XIAP;TYK2;NFKB1;MAPK12;PIK3R5;MAPK9;CASP8;IRAK1;AKT2;TRAF6;TAB2;ITGA6;JAK2;BIRC2
Growth hormone synthesis, secretion and action	18/119	0.394233	0.404247	0.999996	0	0	1.09997	1.02387	MAP2K3;ATF2;MAP2K4;STAT5B;SHC1;ITPR1;CACNA1C;PTK2;MAPK12;MAPK9;PLCB3;CREB1;PLCB4;AKT2;GNAS;PLCG1;JAK2;CRK
Oxidative phosphorylation	20/133	0.395253	0.403124	0.999996	0	0	1.09243	1.01402	ATP6V1A;COX7B;ATP6V0B;NDUFA7;NDUFB10;ATP6AP1;NDUFA5;NDUFB5;NDUFA4;COX4I1;NDUFA3;SDHC;UQCRH;COX6B1;PPA2;NDUFS7;NDUFS4;ATP6V1H;NDUFV3;ATP6V0D1
Mannose type O-glycan biosynthesis	2023-04-23	0.402605	0.39512	0.999996	0	0	1.29905	1.18188	B4GALT2;POMGNT2;LARGE1;FKTN
Mismatch repair	2023-04-23	0.402605	0.39512	0.999996	0	0	1.29905	1.18188	RFC1;EXO1;PMS2;MLH1
Ras signaling pathway	34/232	0.406029	0.391443	0.999996	0	0	1.05996	0.955376	SHC1;CALML4;PLA2G6;EFNA5;PLD2;RAP1B;MAPK9;RASSF1;AKT2;ABL2;SHOC2;PLCG1;PAK3;BRAP;RALBP1;CHUK;INSR;GNG12;NFKB1;VEGFA;TIAM1;AFDN;RASA4;GNB2;GNB1;REL;GNB4;NF1;CALM2;RGL2;FGFR3;MET;FGFR2;FGFR1
Sulfur metabolism	2023-02-10	0.416577	0.380304	0.999996	0	0	1.5425	1.35074	BPNT1;PAPSS1
Synthesis and degradation of ketone bodies	2023-02-10	0.416577	0.380304	0.999996	0	0	1.5425	1.35074	HMGCS1;ACAT1
Pathways of neurodegeneration	68/475	0.428279	0.368273	0.999996	0	0	1.03137	0.874578	APP;COX7B;COX4I1;PARK7;CALML4;UBE2L3;PPP3CB;ACTR1B;PPP3CC;CASP8;MAP2K3;CSNK2A1;APAF1;CSNK2A2;GPX8;SDHC;COX6B1;PSMA5;ERN1;PLCB3;PSMA3;PLCB4;ALS2;NDUFS7;PSMA2;NDUFS4;ULK2;VDAC1;OPTN;STX1A;NDUFB10;PSMD14;DCTN2;NDUFB5;ITPR1;HTT;HTRA2;AMBRA1;CACNA1C;KLC1;UBE2J2;UQCRH;ATXN3;KLC4;MAPK9;ATXN2;ATXN1;DVL1;ATXN1L;DVL3;PLCG1;NDUFV3;CAMK2G;WNT10B;NDUFA7;NDUFA5;NDUFA4;NDUFA3;BRAF;NFKB1;MAPK12;PSMC6;APC;FAS;UBA…
Selenocompound metabolism	2023-03-17	0.430019	0.366513	0.999996	0	0	1.32216	1.11581	CTH;SEPHS1;PAPSS1
Parkinson disease	36/249	0.435719	0.360793	0.999996	0	0	1.04311	0.866574	COX7B;NDUFB10;PSMD14;NDUFB5;COX4I1;ITPR1;HTRA2;CALML4;PARK7;UBE2J2;KLC1;UQCRH;UBE2L3;KLC4;MAPK9;PLCG1;NDUFV3;CAMK2G;NDUFA7;APAF1;NDUFA5;NDUFA4;NDUFA3;SDHC;COX6B1;PSMA5;ERN1;PSMA3;PSMC6;NDUFS7;PSMA2;NDUFS4;GNAS;VDAC1;UBA1;CALM2
Signaling pathways regulating pluripotency of stem cells	21/143	0.43574	0.360773	0.999996	0	0	1.06225	0.882423	ACVR1;SMAD2;WNT10B;RIF1;PCGF5;SMAD9;MAPK12;APC;AKT2;KAT6A;DVL1;SMARCAD1;DVL3;TCF3;IL6ST;JAK2;SKIL;FGFR3;FGFR2;BMPR1A;FGFR1
Vitamin digestion and absorption	2023-04-24	0.435856	0.360657	0.999996	0	0	1.23403	1.02479	SCARB1;ABCC1;SLC46A1;LMBRD1
VEGF signaling pathway	1959-09-01	0.441857	0.354718	0.999996	0	0	1.11068	0.907168	PPP3CB;PPP3CC;SRC;AKT2;NFATC2;PLCG1;MAPK12;PTK2;VEGFA
Apelin signaling pathway	20/137	0.450162	0.346631	0.999996	0	0	1.05483	0.841911	SMAD2;HDAC4;HDAC5;PRKAA1;ITPR1;PRKAG2;CALML4;NRF1;GNG12;PIK3R5;SLC9A1;PLCB3;PLCB4;RPS6KB1;AKT2;GNB2;GNB1;GNB4;CALM2;MEF2D
Glycolysis / Gluconeogenesis	1967-10-01	0.461492	0.335836	0.999996	0	0	1.08248	0.837073	MINPP1;LDHA;TPI1;PKM;PGK1;ENO1;ENO2;ALDOA;GAPDH;PFKP
Ubiquinone and other terpenoid-quinone biosynthesis	2023-02-11	0.466932	0.330747	0.999996	0	0	1.37103	1.04414	VKORC1L1;COQ2
Human papillomavirus infection	47/331	0.471843	0.326202	0.999996	0	0	1.02119	0.767027	RB1;ATP6V1A;HDAC2;TNC;UBR4;PPP2R2A;UBE3A;RBPJ;CASP8;AKT2;DVL1;ATP6V1H;DVL3;ITGB8;IKBKE;MAGI1;WNT10B;TCF7L2;ATP6V0B;ATP6AP1;CHUK;SCRIB;TSC1;TYK2;TUBG1;PTK2;NFKB1;VEGFA;CCNA2;CREB1;PKM;APC;RPS6KB1;TRAF3;PARD3;CDK2;TADA3;PPP2R2D;GNAS;MDM2;FAS;COL6A3;ATM;ITGA6;ATP6V0D1;LLGL2;ATR
Rap1 signaling pathway	30/210	0.474232	0.324009	0.999996	0	0	1.02838	0.767233	SRC;CTNND1;CALML4;EFNA5;RAP1B;SIPA1L1;AKT2;KRIT1;PLCG1;VASP;MAGI1;MAP2K3;INSR;BRAF;MAPK12;VEGFA;TIAM1;AFDN;PLCB3;PLCB4;PARD3;GNAS;CALM2;RAPGEF6;FGFR3;CRK;MET;SIPA1;FGFR2;FGFR1
Diabetic cardiomyopathy	29/203	0.475689	0.322677	0.999996	0	0	1.02837	0.76407	COX7B;NDUFB10;NDUFB5;COX4I1;SLC2A1;UQCRH;PPP1CB;MAPK9;MPC1;AKT2;NDUFV3;CAMK2G;SMAD2;NDUFA7;NDUFA5;NDUFA4;INSR;NDUFA3;SDHC;NFKB1;MAPK12;COX6B1;TGFBR2;PLCB3;PLCB4;NDUFS7;NDUFS4;VDAC1;GAPDH
Glycerolipid metabolism	1961-09-01	0.483493	0.31561	0.999996	0	0	1.06784	0.776016	PLPP5;DGKD;GK;GPAM;MBOAT1;MBOAT2;GPAT3;PLPP1;DGKH
Hepatocellular carcinoma	24/168	0.483701	0.315423	0.999996	0	0	1.02832	0.746856	RB1;SMAD2;WNT10B;TCF7L2;SMARCC1;PBRM1;GSTO2;SHC1;LEF1;MGST2;BRAF;ARID1A;SMARCA2;ARID1B;TGFBR2;APC;RPS6KB1;AKT2;DPF1;DVL1;DVL3;PLCG1;POLK;MET
T cell receptor signaling pathway	15/104	0.487319	0.312187	0.999996	0	0	1.03984	0.747477	CHUK;NFATC3;NFATC2;CBLB;NFKB1;MALT1;MAPK12;MAPK9;PPP3CB;PPP3CC;TEC;AKT2;FYN;PLCG1;PAK3
Toll-like receptor signaling pathway	15/104	0.487319	0.312187	0.999996	0	0	1.03984	0.747477	MAP2K3;MAP2K4;CHUK;NFKB1;MAPK12;MAPK9;CASP8;IRAK1;TRAF3;AKT2;TRAF6;TAB2;IRF5;TLR5;IKBKE
Prostate cancer	14/97	0.4896	0.310158	0.999996	0	0	1.04067	0.743209	RB1;TCF7L2;HSP90AB1;CHUK;LEF1;BRAF;NFKB1;CREB1;ZEB1;AKT2;CDK2;MDM2;FGFR2;FGFR1
Base excision repair	1933-05-01	0.495979	0.304537	0.999996	0	0	1.10169	0.772532	POLB;SMUG1;MBD4;MPG;TDG
Cushing syndrome	22/155	0.500313	0.300758	0.999996	0	0	1.02051	0.706724	RB1;ATF2;SCARB1;USP8;WNT10B;TCF7L2;LEF1;ITPR1;ARNT;BRAF;CACNA1C;RAP1B;PLCB3;CREB1;PLCB4;APC;DVL1;CDK2;GNAS;DVL3;PDE8A;CAMK2G
Renin secretion	1969-10-01	0.500603	0.300507	0.999996	0	0	1.04567	0.72354	PPP3CB;PLCB3;PPP3CC;CREB1;PLCB4;ITPR1;GNAS;CALML4;CACNA1C;CALM2
Aldosterone synthesis and secretion	14/98	0.505918	0.295919	0.999996	0	0	1.02822	0.700607	ATF1;ATF2;SCARB1;PDE2A;ITPR1;ATP2B4;CALML4;CACNA1C;PLCB3;CREB1;PLCB4;GNAS;CALM2;CAMK2G
mRNA surveillance pathway	14/98	0.505918	0.295919	0.999996	0	0	1.02822	0.700607	SMG1;PYM1;UPF3B;PPP2R2A;MSI2;NXT2;SMG7;SRRM1;PPP1CB;FIP1L1;PPP2R2D;PAPOLA;SAP18;RNPS1
Glycosaminoglycan degradation	2023-03-19	0.506363	0.295538	0.999996	0	0	1.15675	0.787174	IDUA;GLB1;HPSE
Prolactin signaling pathway	1970-10-01	0.519875	0.284101	0.999996	0	0	1.02818	0.672599	MAPK9;STAT5B;SHC1;SRC;AKT2;JAK2;SOCS6;MAPK12;NFKB1;SOCS5
RIG-I-like receptor signaling pathway	1970-10-01	0.519875	0.284101	0.999996	0	0	1.02818	0.672599	MAPK9;CYLD;CASP8;CHUK;TRAF3;TRAF6;IKBKE;MAPK12;NFKB1;ATG5
Thyroid hormone signaling pathway	17/121	0.527315	0.27793	0.999996	0	0	1.00836	0.645306	PFKFB2;NCOA2;HDAC2;SRC;NCOA3;SLC2A1;SLC9A1;MED17;KAT2B;PLCB3;NCOR1;PLCB4;SIN3A;AKT2;MDM2;PLCG1;PFKP
Pyrimidine metabolism	1956-08-01	0.529402	0.276215	0.999996	0	0	1.02816	0.653916	DCTD;CDA;NT5C3B;DUT;NME6;TK2;TK1;TYMS
Fatty acid elongation	2023-04-27	0.531639	0.274383	0.999996	0	0	1.07288	0.677835	TECR;PPT2;HACD2;HACD4
Synaptic vesicle cycle	1978-11-01	0.534068	0.272403	0.999996	0	0	1.01278	0.635249	DNM3;ATP6V1A;ATP6V0B;UNC13A;ATP6V1H;AP2B1;ATP6V0D1;AP2M1;DNM1;STX1A;DNM2
Oocyte meiosis	18/129	0.538293	0.268981	0.999996	0	0	1.00029	0.619533	FBXW11;ITPR1;CALML4;YWHAZ;MAPK12;PPP1CB;RPS6KA3;PPP3CB;PPP3CC;CDC26;CDK2;CDK1;SPDYA;ANAPC5;BTRC;CALM2;CPEB2;CAMK2G
Steroid biosynthesis	2023-03-20	0.542479	0.265617	0.999996	0	0	1.08865	0.665822	SOAT1;MSMO1;LBR
GnRH secretion	1964-09-01	0.544345	0.264126	0.999996	0	0	1.00941	0.613898	PLCB3;GABBR1;PLCB4;AKT2;TRPC1;ITPR1;ARRB1;CACNA1C;KCNN4
Colorectal cancer	1986-12-01	0.546949	0.262053	0.999996	0	0	1.00029	0.603576	SMAD2;MAPK9;TCF7L2;APC;RPS6KB1;AKT2;LEF1;BRAF;POLK;MLH1;APPL1;TGFBR2
Insulin resistance	15/108	0.549636	0.259925	0.999996	0	0	0.994885	0.595438	PTPN1;CRTC2;PRKAA1;INSR;OGA;SLC2A1;PRKAG2;NFKB1;PPP1CB;RPS6KA3;MAPK9;CREB1;RPS6KB1;AKT2;MLX
Glutathione metabolism	1957-08-01	0.550553	0.259201	0.999996	0	0	1.00712	0.601078	GPX4;GSTO2;IDH2;GPX8;SMS;MGST2;CHAC2;PRDX6
Non-small cell lung cancer	1972-10-01	0.557659	0.253631	0.999996	0	0	0.994894	0.581025	RB1;EML4;STAT5B;RASSF1;AKT2;RARB;BRAF;POLK;PLCG1;MET
TGF-beta signaling pathway	13/94	0.558758	0.252777	0.999996	0	0	0.989953	0.576192	ACVR1;TGIF1;SMAD2;SMURF2;SMAD9;SMAD6;TGFBR2;SMAD7;TFDP1;ZFYVE16;RPS6KB1;E2F5;BMPR1A
Cortisol synthesis and secretion	1965-09-01	0.564021	0.248704	0.999996	0	0	0.991331	0.567699	ATF2;SCARB1;PLCB3;CREB1;PLCB4;ITPR1;GNAS;CACNA1C;PDE8A
Platelet activation	17/124	0.570394	0.243825	0.999996	0	0	0.979913	0.550151	VASP;ARHGEF12;PPP1R12A;SYK;ROCK2;SRC;SNAP23;ITPR1;MAPK12;PIK3R5;PPP1CB;RAP1B;PLCB3;PLCB4;AKT2;GNAS;FYN
Measles	19/139	0.575554	0.239914	0.999996	0	0	0.976513	0.539447	STAT5B;CSNK2A1;APAF1;CHUK;CSNK2A2;CBLB;EIF2AK4;TYK2;NFKB1;MAPK9;CASP8;IRAK1;TRAF3;AKT2;TRAF6;CDK2;FAS;TAB2;IKBKE
Vascular smooth muscle contraction	18/133	0.593383	0.226665	0.999996	0	0	0.965274	0.503791	ARHGEF11;ARHGEF12;PPP1R12A;ROCK2;ITPR1;BRAF;CALML4;CACNA1C;PLA2G6;PPP1CB;MYL6;KCNU1;PLCB3;PLCB4;CALD1;GNAS;PPP1R12B;CALM2
Phospholipase D signaling pathway	20/148	0.597266	0.223832	0.999996	0	0	0.96356	0.496613	DGKD;SYK;SHC1;INSR;TSC1;DNM1;PIK3R5;PLD2;DNM2;DNM3;CYTH3;PLCB3;PLCB4;AKT2;GNAS;PIP5K1A;FYN;PLCG1;PLPP1;DGKH
Retrograde endocannabinoid signaling	20/148	0.597266	0.223832	0.999996	0	0	0.96356	0.496613	NDUFA7;NDUFB10;NDUFA5;NDUFB5;NDUFA4;NDUFA3;ITPR1;CACNA1C;GNG12;MAPK12;MAPK9;PLCB3;PLCB4;NDUFS7;GNB2;GNB1;NDUFS4;GNB4;NDUFV3;GABRE
Thyroid cancer	1937-05-01	0.602464	0.220069	0.999996	0	0	0.963757	0.488362	TCF7L2;LEF1;NCOA4;BRAF;POLK
Sphingolipid signaling pathway	16/119	0.603536	0.219297	0.999996	0	0	0.957966	0.483725	ABCC1;CERS5;ASAH1;SGMS1;ROCK2;PPP2R2A;NFKB1;MAPK12;PLD2;MAPK9;PLCB3;PLCB4;AKT2;PPP2R2D;BDKRB2;FYN
Arginine biosynthesis	2023-03-22	0.609855	0.214774	0.999996	0	0	0.973939	0.481647	GLUD1;ARG2;GLS
Glioma	1975-10-01	0.611936	0.213294	0.999996	0	0	0.94881	0.465987	RB1;SHC1;AKT2;MDM2;BRAF;CALML4;POLK;PLCG1;CAMK2G;CALM2
Glyoxylate and dicarboxylate metabolism	2023-04-30	0.618629	0.20857	0.999996	0	0	0.94892	0.455719	GCSH;PCCA;ACO2;ACAT1
Glycosaminoglycan biosynthesis	1953-07-01	0.622151	0.206104	0.999996	0	0	0.938524	0.445398	B4GALT2;EXT2;EXTL2;B4GALT7;EXTL3;HS6ST2;ST3GAL2
Adrenergic signaling in cardiomyocytes	20/150	0.622365	0.205955	0.999996	0	0	0.948625	0.449865	ATF2;TPM1;CREM;ATP2B4;PPP2R2A;CALML4;CACNA1C;MAPK12;PIK3R5;SLC9A1;PPP1CB;PLCB3;RPS6KA5;CREB1;PLCB4;AKT2;PPP2R2D;GNAS;CALM2;CAMK2G
Morphine addiction	1991-12-01	0.629224	0.201195	0.999996	0	0	0.936709	0.433948	GABBR1;GRK2;GNB2;PDE2A;GNB1;GNAS;GNB4;ARRB1;GABRE;GNG12;PDE7A;PDE8A
Ribosome	21/158	0.629632	0.200913	0.999996	0	0	0.945117	0.437229	RPL5;RPS9;RPL10;MRPS11;RPL22;MRPL27;RPL23A;MRPL15;MRPL24;MRPS18C;MRPL22;MRPL33;MRPL30;RPS14;RPL27A;RPS20;MRPL9;RPS2;RPL29;RPL17;RPS24
Amyotrophic lateral sclerosis	49/364	0.630074	0.200609	0.999996	0	0	0.958815	0.442894	COX7B;COX4I1;NXT2;PPP3CB;ACTR1B;PPP3CC;NDC1;MAP2K3;APAF1;GPX8;SDHC;COX6B1;PSMA5;ERN1;PSMA3;ALS2;NDUFS7;PSMA2;NDUFS4;ULK2;SRSF3;VDAC1;MATR3;NUP98;SRSF7;OPTN;NDUFB10;PSMD14;DCTN2;NDUFB5;AMBRA1;KLC1;UQCRH;KLC4;ATXN2;UBQLN1;NDUFV3;HNRNPA1;NDUFA7;NDUFA5;NDUFA4;NDUFA3;NUP153;MAPK12;PSMC6;HNRNPA2B1;NUP35;DNAL4;DNAL1
Proteasome	1946-06-01	0.634926	0.197277	0.999996	0	0	0.925108	0.420228	PSMA5;PSMA3;PSMC6;PSMD14;PSMA2;PSME3
Glutamatergic synapse	15/114	0.637574	0.195469	0.999996	0	0	0.934262	0.420496	TRPC1;ITPR1;CACNA1C;GNG12;GLS;PLD2;PPP3CB;PLCB3;GRK2;PPP3CC;PLCB4;GNB2;GNB1;GNAS;GNB4
NOD-like receptor signaling pathway	24/181	0.638612	0.194763	0.999996	0	0	0.942454	0.422651	HSP90AB1;CHUK;RIPK2;NEK7;ITPR1;ERBIN;XIAP;TYK2;NFKB1;MAPK12;MAPK9;PLCB3;CASP8;PLCB4;TRAF3;TRAF6;NAMPT;TAB3;VDAC1;TAB2;DNM1L;IKBKE;BIRC2;ATG5
Adipocytokine signaling pathway	1969-09-01	0.638725	0.194686	0.999996	0	0	0.925027	0.414673	MAPK9;PRKAA1;CHUK;AKT2;SLC2A1;PRKAG2;JAK2;NFKB1;CAMKK2
Axon guidance	24/182	0.649637	0.18733	0.999996	0	0	0.936434	0.403924	SEMA6C;ARHGEF12;SEMA4D;ROCK2;SRC;TRPC1;LIMK1;SEMA4C;NFATC3;NFATC2;UNC5C;SEMA3F;EFNA5;PTK2;SSH1;PPP3CB;PPP3CC;PARD3;FYN;PLCG1;SRGAP3;PAK3;MET;CAMK2G
AGE-RAGE signaling pathway in diabetic complications	13/100	0.651813	0.185877	0.999996	0	0	0.921357	0.394339	SMAD2;STAT5B;NFKB1;MAPK12;TGFBR2;VEGFA;DIAPH1;MAPK9;PLCB3;PLCB4;AKT2;PLCG1;JAK2
Progesterone-mediated oocyte maturation	13/100	0.651813	0.185877	0.999996	0	0	0.921357	0.394339	HSP90AB1;BRAF;MAPK12;CCNA2;RPS6KA3;MAPK9;AKT2;CDC26;CDK2;CDK1;SPDYA;ANAPC5;CPEB2
Insulin secretion	1986-11-01	0.668832	0.174683	0.999996	0	0	0.90433	0.363741	ATF2;KCNU1;PLCB3;CREB1;PLCB4;SLC2A1;GNAS;CACNA1C;KCNN4;CAMK2G;STX1A
Ferroptosis	1941-05-01	0.694868	0.158098	0.999996	0	0	0.856473	0.311785	TFRC;GPX4;NCOA4;SAT1;ATG5
Gastric cancer	19/149	0.699182	0.15541	0.999996	0	0	0.900869	0.322371	RB1;SMAD2;WNT10B;TCF7L2;SHC1;LEF1;BRAF;MLH1;TGFBR2;APC;RPS6KB1;AKT2;DVL1;CDK2;DVL3;RARB;POLK;MET;FGFR2
Apoptosis	18/142	0.705733	0.151359	0.999996	0	0	0.894742	0.311834	DFFB;APAF1;CHUK;ITPR1;HTRA2;XIAP;PTPN13;NFKB1;ERN1;MAPK9;CASP8;AKT2;CASP2;FAS;ATM;BIRC6;SPTAN1;BIRC2
Primary bile acid biosynthesis	2023-02-17	0.708053	0.149934	0.999996	0	0	0.822334	0.2839	HSD3B7;SCP2
B cell receptor signaling pathway	1981-10-01	0.709404	0.149106	0.999996	0	0	0.868325	0.298122	PPP3CB;PPP3CC;CHUK;SYK;AKT2;INPPL1;NFATC3;NFATC2;MALT1;NFKB1
Arginine and proline metabolism	1950-06-01	0.715546	0.145362	0.999996	0	0	0.840811	0.281427	ARG2;P4HA1;SMOX;SMS;AZIN2;SAT1
Cysteine and methionine metabolism	1950-06-01	0.715546	0.145362	0.999996	0	0	0.840811	0.281427	LDHA;CTH;APIP;DNMT3B;SMS;BCAT1
Endometrial cancer	1958-07-01	0.716802	0.144601	0.999996	0	0	0.846265	0.281769	TCF7L2;APC;AKT2;LEF1;BRAF;POLK;MLH1
Folate biosynthesis	2023-03-26	0.723465	0.140582	0.999996	0	0	0.804371	0.260377	PCBD2;MOCS1;GPHN
Cholinergic synapse	14/113	0.724278	0.140095	0.999996	0	0	0.871663	0.281181	ITPR1;CACNA1C;GNG12;PIK3R5;PLCB3;CREB1;PLCB4;AKT2;GNB2;GNB1;GNB4;FYN;JAK2;CAMK2G
Prion disease	35/273	0.731612	0.135719	0.999996	0	0	0.905946	0.283113	ATF2;COX7B;NDUFB10;PSMD14;NDUFB5;COX4I1;ITPR1;CACNA1C;KLC1;UQCRH;KLC4;MAPK9;PPP3CB;PPP3CC;FYN;NCAM1;NDUFV3;NDUFA7;CSNK2A1;APAF1;NDUFA5;NDUFA4;NDUFA3;CSNK2A2;SDHC;MAPK12;COX6B1;PSMA5;PSMA3;PSMC6;CREB1;NDUFS7;PSMA2;NDUFS4;VDAC1
Estrogen signaling pathway	17/137	0.73521	0.133589	0.999996	0	0	0.873092	0.268563	ATF2;NCOA2;GABBR1;HSP90AB1;SHC1;SRC;NCOA3;ITPR1;CALML4;PLCB3;CREB1;PLCB4;AKT2;GNAS;RARA;CALM2;EBAG9
Other glycan degradation	2023-02-18	0.737958	0.131968	0.999996	0	0	0.770893	0.23425	GLB1;GBA
Fc epsilon RI signaling pathway	1968-08-01	0.749786	0.125063	0.999996	0	0	0.821951	0.236695	MAP2K3;MAP2K4;MAPK9;SYK;AKT2;FYN;PLCG1;MAPK12
Chemokine signaling pathway	24/192	0.74988	0.125008	0.999996	0	0	0.880178	0.253352	STAT5B;CHUK;SHC1;ROCK2;SRC;BRAF;ARRB1;GNG12;NFKB1;PTK2;PIK3R5;RAP1B;TIAM1;PLCB3;GRK2;PLCB4;AKT2;PARD3;GNB2;GNB1;GNB4;PLCG1;JAK2;CRK
Vasopressin-regulated water reabsorption	1944-05-01	0.753726	0.122786	0.999996	0	0	0.790453	0.223481	DYNC2H1;CREB1;DCTN2;GNAS;RAB11A
FoxO signaling pathway	16/131	0.753768	0.122762	0.999996	0	0	0.857403	0.242362	PRKAA1;CHUK;INSR;BNIP3;PRKAG2;BRAF;SOD2;MAPK12;TGFBR2;MAPK9;AKT2;CDK2;MDM2;ATM;SGK3;SKP2
Ribosome biogenesis in eukaryotes	13/108	0.757407	0.120671	0.999996	0	0	0.843375	0.234336	NOP56;CSNK2A1;NVL;POP4;CSNK2A2;NMD3;NXT2;GNL3;REXO5;EIF6;TCOF1;DKC1;SBDS
DNA replication	1936-04-01	0.759295	0.11959	0.999996	0	0	0.770729	0.212232	POLA1;RNASEH2B;RFC1;MCM4
Melanogenesis	12/101	0.767321	0.115023	0.999996	0	0	0.830975	0.220084	WNT10B;TCF7L2;PLCB3;CREB1;PLCB4;DVL1;LEF1;GNAS;DVL3;CALML4;CALM2;CAMK2G
Phototransduction	2023-03-28	0.769726	0.113664	0.999996	0	0	0.739935	0.193656	GNB1;CALML4;CALM2
Hepatitis C	19/157	0.781179	0.107249	0.999996	0	0	0.848247	0.209475	RB1;SCARB1;APAF1;CHUK;PPP2R2A;BRAF;EIF2AK4;TYK2;YWHAZ;NFKB1;CASP8;TRAF3;AKT2;PSME3;TRAF6;CDK2;PPP2R2D;FAS;IKBKE
One carbon pool by folate	2023-02-20	0.789952	0.102399	0.999996	0	0	0.685159	0.161549	MTHFD2L;TYMS
Basal cell carcinoma	1963-07-01	0.793987	0.100187	0.999996	0	0	0.770481	0.177741	TCF7L2;WNT10B;APC;LEF1;DVL1;DVL3;POLK
Nucleotide excision repair	1947-05-01	0.803656	0.0949299	0.999996	0	0	0.733863	0.160411	CDK7;RFC1;CCNH;ERCC1;XPA
Pyruvate metabolism	1947-05-01	0.803656	0.0949299	0.999996	0	0	0.733863	0.160411	LDHA;PKM;ME2;ACACA;ACAT1
Taurine and hypotaurine metabolism	2023-01-11	0.808544	0.0922962	0.999996	0	0	0.616708	0.131063	CSAD
GABAergic synapse	1989-10-01	0.812551	0.0901496	0.999996	0	0	0.780029	0.161916	GABBR1;SRC;GNB2;GNB1;GNB4;CACNA1C;GABRE;GNG12;GPHN;GLS
Valine, leucine and isoleucine degradation	1948-05-01	0.8184	0.0870344	0.999996	0	0	0.716755	0.143641	AUH;HMGCS1;PCCA;BCAT1;ACAT1
Galactose metabolism	2023-03-31	0.82705	0.0824685	0.999996	0	0	0.660541	0.125431	B4GALT2;GLB1;PFKP
RNA polymerase	2023-03-31	0.82705	0.0824685	0.999996	0	0	0.660541	0.125431	POLR3B;POLR3GL;POLR2D
Thyroid hormone synthesis	1975-08-01	0.839002	0.076237	0.999996	0	0	0.735775	0.129159	ATF2;PLCB3;CREB1;PLCB4;CANX;GPX8;ITPR1;GNAS
Gastric acid secretion	1976-08-01	0.849411	0.070882	0.999996	0	0	0.724912	0.118314	PLCB3;PLCB4;ITPR1;GNAS;CALML4;CAMK2G;CALM2;SLC9A1
Proximal tubule bicarbonate reclamation	2023-02-23	0.850872	0.0701356	0.999996	0	0	0.587176	0.0948249	GLUD1;GLS
Salivary secretion	1993-10-01	0.852546	0.0692823	0.999996	0	0	0.742264	0.118412	PLCB3;PLCB4;ITPR1;ATP2B4;GNAS;AQP5;CALML4;KCNN4;CALM2;SLC9A1
Long-term depression	1960-06-01	0.860333	0.0653333	0.999996	0	0	0.684706	0.103004	GNAZ;PLCB3;PLCB4;ITPR1;GNAS;BRAF
Mineral absorption	1960-06-01	0.860333	0.0653333	0.999996	0	0	0.684706	0.103004	SLC46A1;VDR;ATP2B4;STEAP1;TRPM6;HMOX2
Viral myocarditis	1960-06-01	0.860333	0.0653333	0.999996	0	0	0.684706	0.103004	CASP8;ABL2;FYN;EIF4G3;EIF4G2;EIF4G1
Purine metabolism	14/129	0.876648	0.0571748	0.999996	0	0	0.749687	0.0986962	PDE2A;AK4;NTPCR;AMPD3;PAICS;PAPSS1;NUDT9;DGUOK;NT5C3B;PKM;NME6;IMPDH1;PDE7A;PDE8A
Alcoholism	21/186	0.878741	0.0561392	0.999996	0	0	0.783447	0.101272	HDAC4;ATF2;HDAC5;HDAC2;SHC1;BRAF;CALML4;GNG12;HDAC8;CAMKK2;HDAC7;PPP1CB;CREB1;GNB2;HAT1;GNB1;GNAS;GNB4;SLC29A1;CALM2;SLC29A2
Serotonergic synapse	12/113	0.880118	0.0554589	0.999996	0	0	0.731732	0.0934413	APP;PLCB3;PLCB4;GNB2;TRPC1;GNB1;ITPR1;GNAS;GNB4;BRAF;CACNA1C;GNG12
Gap junction	1988-09-01	0.881388	0.0548329	0.999996	0	0	0.701774	0.0886041	MAP3K2;PLCB3;PLCB4;SRC;ITPR1;CDK1;GNAS;CSNK1D;MAP2K5
alpha-Linolenic acid metabolism	2023-02-25	0.882037	0.0545132	0.999996	0	0	0.536055	0.0672863	ACOX1;PLA2G6
Melanoma	1972-07-01	0.891217	0.0500168	0.999996	0	0	0.663451	0.0764083	RB1;AKT2;MDM2;BRAF;POLK;MET;FGFR1
Mucin type O-glycan biosynthesis	1936-03-01	0.895466	0.0479507	0.999996	0	0	0.560296	0.0618626	GALNT1;GALNT10;ST3GAL2
Type II diabetes mellitus	1946-04-01	0.900264	0.0456299	0.999996	0	0	0.58688	0.0616616	MAPK9;PKM;INSR;CACNA1C
African trypanosomiasis	1937-03-01	0.905804	0.0429656	0.999996	0	0	0.543785	0.0537978	PLCB3;PLCB4;FAS
Collecting duct acid secretion	2023-02-27	0.907076	0.0423563	0.999996	0	0	0.493113	0.0480929	ATP6V1A;ATP6V0D1
Coronavirus disease	26/232	0.907734	0.0420412	0.999996	0	0	0.77646	0.0751641	RPL5;RPL10;RPS14;MAPK9;IRAK1;PLCG1;RPS2;IKBKE;RPL17;RPS9;SYK;CHUK;RPL22;RPL23A;TYK2;NFKB1;MAPK12;ADAM17;TRAF3;RPL27A;TRAF6;RPS20;TAB2;RPL29;IL6ST;RPS24
Necroptosis	17/159	0.908018	0.0419056	0.999996	0	0	0.736874	0.0711019	STAT5B;HSP90AB1;IFNGR1;SPATA2;XIAP;TYK2;CYLD;GLUD1;MAPK9;CASP8;CHMP3;FAS;VDAC1;DNM1L;JAK2;CAMK2G;BIRC2
Other types of O-glycan biosynthesis	1947-04-01	0.909251	0.0413161	0.999996	0	0	0.573198	0.0545306	B4GALT2;GALNT1;B3GLCT;GALNT10
Butanoate metabolism	2023-02-28	0.917641	0.037327	0.999996	0	0	0.47412	0.04075	HMGCS1;ACAT1
Pancreatic secretion	10/102	0.917911	0.0371992	0.999996	0	0	0.669299	0.0573284	RAP1B;PLCB3;PLCB4;TRPC1;ITPR1;GNAS;ATP2B4;RAB11A;TPCN2;SLC9A1
Pertussis	1976-07-01	0.920032	0.0361973	0.999996	0	0	0.624844	0.0520791	MAPK9;IRAK1;TRAF6;CALML4;CALM2;MAPK12;NFKB1
Nitrogen metabolism	2023-01-17	0.922323	0.0351171	0.999996	0	0	0.385308	0.031156	GLUD1
Cocaine addiction	1949-04-01	0.92509	0.033816	0.999996	0	0	0.547659	0.0426431	ATF2;CREB1;GNAS;NFKB1
Leishmaniasis	1977-07-01	0.926107	0.0333388	0.999996	0	0	0.615882	0.0472784	IRAK1;IFNGR1;TRAF6;TAB2;JAK2;MAPK12;NFKB1
Breast cancer	15/147	0.92945	0.0317739	0.999996	0	0	0.699345	0.0511655	RB1;JAG2;WNT10B;TCF7L2;SHC1;NCOA3;LEF1;BRAF;APC;RPS6KB1;AKT2;DVL1;DVL3;POLK;FGFR1
Antigen processing and presentation	1978-07-01	0.931776	0.0306886	0.999996	0	0	0.607172	0.0429047	HSP90AB1;CREB1;NFYA;HSPA4;NFYB;PSME3;CANX
Cardiac muscle contraction	1987-08-01	0.931778	0.0306877	0.999996	0	0	0.623575	0.0440624	COX7B;ASPH;COX4I1;TPM1;CACNA1C;UQCRH;COX6B1;SLC9A1
Cholesterol metabolism	1950-04-01	0.932036	0.0305671	0.999996	0	0	0.535722	0.0377059	SCARB1;SOAT1;TSPO;VDAC1
Fatty acid biosynthesis	2023-01-18	0.933168	0.0300403	0.999996	0	0	0.362622	0.0250827	ACACA
Leukocyte transendothelial migration	11/114	0.934617	0.0293662	0.999996	0	0	0.657417	0.0444533	RAP1B;VASP;MYLPF;AFDN;ROCK2;ACTN1;CTNND1;PLCG1;PTK2;MAPK12;SIPA1
Pentose phosphate pathway	1930-02-01	0.935469	0.0289705	0.999996	0	0	0.440203	0.0293646	ALDOA;PFKP
beta-Alanine metabolism	1930-02-01	0.935469	0.0289705	0.999996	0	0	0.440203	0.0293646	SMOX;ACOX1
ECM-receptor interaction	1988-08-01	0.936817	0.0283454	0.999996	0	0	0.615744	0.0401882	TNC;ITGB8;COL6A3;SDC1;ITGA6;CD47;NPNT;CD44
Phagosome	15/152	0.948004	0.0231896	0.999996	0	0	0.673624	0.0359689	DYNC2H1;ATP6V1A;SCARB1;ATP6V0B;TFRC;ATP6AP1;STX7;SEC61A2;PIKFYVE;HGS;CANX;ATP6V1H;ATP6V0D1;RAB7B;SEC22B
Cytosolic DNA-sensing pathway	1963-05-01	0.950406	0.0220909	0.999996	0	0	0.530923	0.027006	CHUK;POLR3B;POLR3GL;IKBKE;NFKB1
Fat digestion and absorption	1943-03-01	0.950579	0.0220117	0.999996	0	0	0.462056	0.0234188	SCARB1;PLPP1;ACAT1
Amoebiasis	9/102	0.956923	0.019123	0.999996	0	0	0.595643	0.0262275	ARG2;PLCB3;PLCB4;IL1R1;ACTN1;GNAS;RAB7B;NFKB1;PTK2
Calcium signaling pathway	25/240	0.958229	0.0185306	0.999996	0	0	0.714706	0.0304953	ITPR1;CALML4;CACNA1C;PPP3CB;PPP3CC;PHKG2;BDKRB2;PLCG1;CAMK2G;ATP2B4;PHKA1;PHKB;TPCN2;VEGFA;ITPKC;PLCB3;PLCB4;ASPH;GNAS;VDAC1;CALM2;FGFR3;MET;FGFR2;FGFR1
ABC transporters	1945-03-01	0.960411	0.017543	0.999996	0	0	0.440002	0.0177735	ABCC1;ABCD3;ABCC10
Carbohydrate digestion and absorption	1947-03-01	0.968381	0.0139536	0.999996	0	0	0.419953	0.0134928	PLCB3;PLCB4;AKT2
Renin-angiotensin system	2023-01-23	0.968493	0.0139034	0.999996	0	0	0.280126	0.00896789	CTSA
PI3K-Akt signaling pathway	38/354	0.970504	0.0130028	0.999996	0	0	0.738211	0.022102	ATF2;CRTC2;PRKAA1;HSP90AB1;TNC;PPP2R2A;EFNA5;PIK3R5;AKT2;MYB;ITGB8;JAK2;EIF4E;MAGI1;SYK;CHUK;INSR;TSC1;GNG12;YWHAZ;PTK2;NFKB1;VEGFA;CREB1;RPS6KB1;GNB2;CDK2;GNB1;PPP2R2D;GNB4;MDM2;COL6A3;SGK3;ITGA6;FGFR3;MET;FGFR2;FGFR1
Alanine, aspartate and glutamate metabolism	1937-02-01	0.973132	0.0118284	0.999996	0	0	0.352019	0.00958753	GLUD1;GLS
Aldosterone-regulated sodium reabsorption	1937-02-01	0.973132	0.0118284	0.999996	0	0	0.352019	0.00958753	INSR;NEDD4L
Neutrophil extracellular trap formation	18/189	0.974159	0.01137	0.999996	0	0	0.647034	0.0169396	HDAC4;HDAC5;HDAC2;SYK;SRC;CLCN3;HDAC8;NFKB1;MAPK12;HDAC7;PLCB3;CLCN5;PLCB4;CLCN4;AKT2;HAT1;VDAC1;PLCG1
Influenza A	16/172	0.974922	0.0110302	0.999996	0	0	0.630544	0.0160146	APAF1;CHUK;IFNGR1;TYK2;NXT2;NFKB1;PML;RAB11A;CASP8;TRAF3;AKT2;FAS;VDAC1;NUP98;JAK2;IKBKE
cAMP signaling pathway	21/216	0.975866	0.0106099	0.999996	0	0	0.66175	0.0161666	GABBR1;PPP1R12A;ROCK2;ATP2B4;BRAF;CALML4;CACNA1C;NFKB1;PLD2;SLC9A1;PPP1CB;RAP1B;TIAM1;AFDN;MAPK9;CREB1;ACOX1;AKT2;GNAS;CALM2;CAMK2G
Ovarian steroidogenesis	1951-03-01	0.979995	0.00877621	0.999996	0	0	0.384867	0.00777739	SCARB1;INSR;GNAS
Natural killer cell mediated cytotoxicity	11/131	0.981147	0.00826608	0.999996	0	0	0.563722	0.0107295	PPP3CB;RAET1E;PPP3CC;SYK;SHC1;IFNGR1;NFATC2;FAS;BRAF;FYN;PLCG1
Glycine, serine and threonine metabolism	1940-02-01	0.981704	0.00801957	0.999996	0	0	0.324171	0.00598607	GCSH;CTH
PPAR signaling pathway	1974-05-01	0.983001	0.00744603	0.999996	0	0	0.445997	0.00764667	SCP2;HMGCS1;GK;ACOX1;SORBS1
Inflammatory bowel disease	1965-04-01	0.985632	0.00628513	0.999996	0	0	0.403634	0.00584141	SMAD2;IFNGR1;TLR5;NFKB1
Tryptophan metabolism	1942-02-01	0.985873	0.00617924	0.999996	0	0	0.307927	0.00438126	DLST;ACAT1
Linoleic acid metabolism	2023-01-29	0.987223	0.00558455	0.999996	0	0	0.220023	0.00282925	PLA2G6
Regulation of lipolysis in adipocytes	1955-03-01	0.987465	0.00547843	0.999996	0	0	0.355179	0.00448043	AKT2;INSR;GNAS
Arrhythmogenic right ventricular cardiomyopathy	1977-05-01	0.987477	0.00547307	0.999996	0	0	0.427339	0.00538542	TCF7L2;LEF1;ITGB8;ITGA6;CACNA1C
Fatty acid degradation	1943-02-01	0.987594	0.00542151	0.999996	0	0	0.300399	0.00375003	ACOX1;ACAT1
Porphyrin and chlorophyll metabolism	1943-02-01	0.987594	0.00542151	0.999996	0	0	0.300399	0.00375003	HMOX2;BLVRA
Type I diabetes mellitus	1943-02-01	0.987594	0.00542151	0.999996	0	0	0.300399	0.00375003	ICA1;FAS
Drug metabolism	8/108	0.988138	0.00518247	0.999996	0	0	0.49202	0.00587131	CDA;DUT;GSTO2;NME6;IMPDH1;MGST2;TK2;TK1
Hypertrophic cardiomyopathy	1990-06-01	0.990315	0.00422682	0.999996	0	0	0.439399	0.00427649	PRKAA1;TPM1;PRKAG2;ITGB8;ITGA6;CACNA1C
Rheumatoid arthritis	1993-06-01	0.992816	0.00313135	0.999996	0	0	0.424173	0.00305837	ATP6V1A;ATP6V0B;ATP6AP1;ATP6V1H;ATP6V0D1;VEGFA
Arachidonic acid metabolism	1961-03-01	0.993878	0.00266675	0.999996	0	0	0.318325	0.00195465	GPX8;PLA2G6;PTGES
Chemical carcinogenesis	21/239	0.994509	0.00239134	0.999996	0	0	0.591132	0.00325493	RB1;ATF2;STAT5B;HSP90AB1;GSTO2;VDR;SRC;MGST2;XIAP;ARNT;ARRB1;CACNA1C;NFKB1;VEGFA;RPS6KA3;CREB1;RPS6KB1;AKT2;GNAS;JAK2;IKBKE
MicroRNAs in cancer	29/310	0.994619	0.00234311	0.999996	0	0	0.632786	0.00341401	HDAC4;HDAC5;HDAC2;SHC1;TNC;EFNA5;GLS;RASSF1;RPS6KA5;STMN1;DNMT3B;PLCG1;ABCC1;UBE2I;TPM1;KIF23;NFKB1;VEGFA;FOXP1;ZEB1;APC;MDM2;ATM;MDM4;FGFR3;CRK;MET;CD44;EZH2
Malaria	1950-02-01	0.995058	0.00215148	0.999996	0	0	0.256486	0.00127063	SDC1;MET
Tyrosine metabolism	1936-01-01	0.995543	0.00193996	0.999996	0	0	0.175946	0.000785939	COMT
Aminoacyl-tRNA biosynthesis	1966-03-01	0.996672	0.00144776	0.999996	0	0	0.292976	0.000976662	SARS2;TARS2;QRSL1
Allograft rejection	1938-01-01	0.996701	0.00143507	0.999996	0	0	0.166416	0.000549902	FAS
Primary immunodeficiency	1938-01-01	0.996701	0.00143507	0.999996	0	0	0.166416	0.000549902	AIRE
JAK-STAT signaling pathway	12/162	0.996737	0.00141932	0.999996	0	0	0.491289	0.00160559	IL15RA;STAT5B;IFNGR1;AKT2;STAM;TYK2;IL6ST;SOCS6;JAK2;PIAS2;PTPN2;SOCS5
Nicotine addiction	1940-01-01	0.997558	0.00106179	0.999996	0	0	0.157864	0.000385957	GABRE
Graft-versus-host disease	1942-01-01	0.998192	0.000785756	0.999996	0	0	0.150146	0.000271654	FAS
Dilated cardiomyopathy	1996-05-01	0.998372	0.000707692	0.999996	0	0	0.337739	0.000550354	TPM1;GNAS;ITGB8;ITGA6;CACNA1C
Taste transduction	1986-04-01	0.998681	0.000573258	0.999996	0	0	0.299897	0.000395856	PLCB3;GABBR1;PLCB4;CACNA1C
Bile secretion	1990-04-01	0.999179	0.000356754	0.999996	0	0	0.285881	0.000234839	SCARB1;SLC2A1;GNAS;SLC9A1
Intestinal immune network for IgA production	1948-01-01	0.999266	0.000318866	0.999996	0	0	0.130932	9.61327e-05	IL15RA
Autoimmune thyroid disease	1953-01-01	0.999653	0.000150778	0.999996	0	0	0.118308	4.10741e-05	FAS
Hematopoietic cell lineage	1999-04-01	0.999721	0.000121089	0.999996	0	0	0.258662	7.21196e-05	TFRC;IL1R1;ITGA6;CD44
Cell adhesion molecules	8/148	0.999762	0.000103263	0.999996	0	0	0.350621	8.33675e-05	CD274;VCAN;SDC1;ITGB8;ITGA6;NCAM1;MPZL1;NECTIN2
Protein digestion and absorption	4/103	0.999828	7.46984e-05	0.999996	0	0	0.248153	4.26822e-05	COL16A1;SLC7A7;COL6A3;KCNN4
Metabolism of xenobiotics by cytochrome P450	1976-02-01	0.999853	6.37997e-05	0.999996	0	0	0.166117	2.44033e-05	GSTO2;MGST2
Steroid hormone biosynthesis	1961-01-01	0.999894	4.60851e-05	0.999996	0	0	0.102486	1.08753e-05	COMT
Complement and coagulation cascades	1985-01-01	0.999994	2.67248e-06	0.999996	0	0	0.0731018	4.4984e-07	BDKRB2
Herpes simplex virus 1 infection	33/498	0.999994	2.5953e-06	0.999996	0	0	0.431032	2.5758e-06	SRC;SRSF1;PPP1CB;ZFP57;CASP8;ZFP30;IRAK1;AKT2;JAK2;IKBKE;POU2F1;APAF1;CHUK;ZFP1;SYK;IFNGR1;TSC1;EIF2AK4;TYK2;NFKB1;PML;SRPK1;ZFP69;TRAF3;TRAF6;SRSF3;FAS;TAB2;SRSF5;SRSF6;SRSF7;BIRC2;NECTIN2
Olfactory transduction	7/440	0.999994	2.4839e-06	0.999996	0	0	0.0974566	5.57392e-07	GRK2;PDE2A;GNB1;ARRB1;CALML4;CALM2;CAMK2G
Neuroactive ligand-receptor interaction	7/341	0.999995	2.31127e-06	0.999996	0	0	0.127089	6.76354e-07	GABBR1;GLRB;PARD3;BDKRB2;TSPO;PTH1R;GABRE
Cytokine-cytokine receptor interaction	10/295	0.999995	2.21566e-06	0.999996	0	0	0.213619	1.08983e-06	ACVR1;IL15RA;IL1R1;IFNGR1;CLCF1;TNFRSF9;FAS;IL6ST;BMPR1A;TGFBR2
Systemic lupus erythematosus	2/135	0.999996	1.74664e-06	0.999996	0	0	0.092108	3.70438e-07	SSB;ACTN1
Viral protein interaction with cytokine and cytokine receptor	1/100	0.999996	1.68636e-06	0.999996	0	0	0.0619715	2.40635e-07	IL6ST
