# Supplementary material for: The context-dependent epigenetic and organogenesis programs determine 3D vs. 2D cellular fitness of MYC-driven murine liver cancer cells
Source: eLife. 2025 May 6;14:RP101299. doi: 10.7554/eLife.101299 (PMC12055005; doi:10.7554/eLife.101299)
Supplement: Supplementary file 9. [file elife-101299-supp9.xlsx]

## Sheet: Normoxia 2D-negative
Names	total	elements
d10 d16 d18 d22 d5 d8	829	Hist1h3h
		Tpt1
		Ssu72
		Ruvbl2
		Copa
		Eif2b2
		Thoc3
		Polr3c
		Pabpc1
		Psma4
		Polr2a
		Igbp1
		Capzb
		Rps6
		Bccip
		Nelfcd
		Rplp2
		Cenpn
		Arcn1
		Chmp6
		Scd2
		Rpl23a
		Kdsr
		Mcm3
		Rps12
		Haus7
		Sdad1
		Trappc5
		Prpf31
		Max
		Mms19
		Nutf2
		Mrto4
		Acsl4
		Pop5
		Trappc3
		Hist1h2bn
		Rfc2
		Dctn6
		Tsen15
		Snrpe
		Bop1
		Atp1a1
		Kansl3
		Ddx52
		Hdac3
		Rps28
		Dnttip2
		Esf1
		Dnajc11
		Cpsf3
		Oip5
		Anapc10
		Hist1h3f
		Xpo1
		Rpia
		Srp72
		Utp15
		Atp6v1d
		Rbm22
		Hscb
		Hus1
		Ppa1
		Atp5d
		Cct2
		Ap2m1
		Supt16
		Ect2
		Atp6v1e1
		Cds2
		Polr1d
		Snapc3
		Prpf38a
		Gtf2b
		Trmt61a
		Pes1
		Rpl37
		Metap1
		Rpl7
		Psmc2
		Exosc3
		Eef1g
		Snw1
		Top3a
		Polr2i
		Rcl1
		Snrpd2
		Cinp
		Lrr1
		Rpl14
		Vmp1
		Slc35b1
		Pmpcb
		Polr2h
		Pop1
		Ppp4c
		Rpl24
		Rad9a
		Wdr3
		Prmt1
		Dnajc13
		Zmat5
		Grwd1
		Nedd8
		Gpn1
		Dbr1
		Xab2
		Lamtor1
		Espl1
		Eef2
		Rpsa
		Hmgcs1
		Dync1i2
		Atp6ap2
		Phf5a
		Sf3a2
		Ddx5
		Rgp1
		Eif2s3x
		Rbm48
		Oraov1
		Rplp0
		Tinf2
		Rabggta
		Mup16
		Eif2s1
		Rpl39
		Snapc5
		Itgav
		Parg
		Tomm40
		Pold2
		Uba2
		Rpl7l1
		Rfc4
		Eef1a1
		Tamm41
		Prpf40a
		Pisd
		Elp5
		Mettl14
		Cpsf3l
		Mrpl4
		Racgap1
		Ercc2
		Snapc1
		Rbbp4
		Orc4
		Psmb1
		Skiv2l2
		Dpagt1
		Ran
		Rpl30
		Hyou1
		Nsf
		Rbm19
		Naa20
		Pam16
		Polr2f
		Aldh18a1
		Timeless
		Ddx3x
		Slc3a2
		Usp39
		Prpf19
		Eif2b4
		Vmn1r128
		Rps8
		Pnn
		Csnk2b
		Sec61b
		Riok1
		Cenpw
		Top1
		Tbl3
		Cct4
		Ykt6
		Rpl8
		Lsm2
		Paf1
		Vcp
		Exosc10
		Nup93
		Adat2
		Gm5148
		Actr2
		Aldoa
		Rpn1
		Snupn
		Narfl
		Ash2l
		Psmc6
		Dnajc17
		Zbtb17
		Alg1
		Rbmx2
		Kat5
		Banf1
		Tut1
		Gtf3c3
		Pgs1
		Tango6
		Lsm10
		Arl2
		Noc4l
		Trmt112
		Srsf3
		Rpl26
		Selo
		Snrnp25
		Psmb4
		Gm14346
		Nmd3
		Spc24
		Mtmr9
		Tfrc
		Ddx54
		Rpl5
		Wbscr22
		Ciao1
		Mettl16
		Gnb2l1
		Rpl36al
		Cdk1
		Usp36
		Cenpm
		Snrnp200
		Rps15a
		Magoh
		Eif1ad
		Wrb
		Spcs2
		Polr2c
		Urb2
		Eif2b1
		Atp2a2
		Tuba1b
		Crcp
		Pfn1
		Gosr2
		Exosc7
		Rrp1
		Thg1l
		Ahcy
		Ptpn11
		Rps14
		Zwint
		Ldha
		Atp6v1a
		Dhx37
		Eif3g
		Plk1
		Smc3
		Gnb1l
		Pop7
		Chaf1b
		Eif4a1
		Napa
		Ipo11
		Dynlrb1
		Elp3
		Med30
		Rpl32
		Tomm22
		Atp6v0e
		Hist1h2ae
		Cct5
		Dhx15
		Gpx4
		Thoc5
		Numa1
		Rps19
		Uxt
		Nol10
		Hmgb1
		Uba1
		Hsd17b12
		Pyroxd1
		Rnf20
		Dad1
		2810408M09Rik
		Srp19
		Hist1h2an
		Zfp335
		Dhdds
		4933402N22Rik
		Smu1
		Emg1
		Rars2
		Gmppb
		Lsm7
		Tbcd
		Prim1
		Sf3b6
		Gm14632
		Eif6
		Snapc2
		Eif5
		Rrm2
		Rps21
		Rpl10
		Mthfd1
		Abt1
		Ddx20
		Ints1
		Rpp21
		Hist1h2ao
		Txn1
		Dnmt1
		Polr3k
		Atp6v0d1
		Rpl35a
		Armc7
		Csnk1a1
		Tmem258
		Gtf2f2
		Ik
		Eif3e
		Nfs1
		Tma16
		Dnaja3
		Cbx3
		Cebpz
		Aurka
		Sptssa
		Pwp2
		Farsb
		Farsa
		Exoc7
		Hspa8
		Polr2l
		Dnm2
		Gins1
		Srebf2
		Wdr12
		Naca
		Snrpb
		Ddx56
		Rpl37a
		Snrpg
		Polr1a
		Tsg101
		Cct7
		Nup205
		Tubgcp3
		Srsf11
		Elac2
		Tnpo3
		Rpl34
		Rbm8a
		Gtf3c1
		Aifm1
		Alg14
		Vmn2r47
		Cdc5l
		Nom1
		Sdha
		Rrn3
		Dtymk
		Yars
		Hspe1
		Actr3
		Pmpca
		Cog3
		Dut
		Ciapin1
		Ints8
		Psma6
		Rpl36a
		Pcyt2
		Cwc22
		Sf3b4
		Hist1h2bj
		Rps15
		Cenpc1
		Cdc26
		Mtch2
		Trmu
		Lsm5
		Fau
		Atp6v0c
		Hist1h4n
		Nhp2
		Nars
		Exosc5
		Cdc45
		Rps23
		Elp2
		Rps27a
		Ppat
		Orc1
		Polr3b
		Fam98b
		Iars
		Cdc73
		Wdr73
		Pdcd11
		Ncbp1
		Gtf2a1
		Gm2897
		Exosc4
		Plrg1
		Telo2
		Ccdc84
		Wdr43
		Rtcb
		Lamtor3
		9030624G23Rik
		Rfc1
		Rps10
		Dna2
		Snapc4
		Rpl18
		Hspa5
		Rfc5
		Hnrnpl
		Rpl13
		Polr1c
		Upf1
		Usp8
		Rangap1
		Psmc3
		Rsl1d1
		Ogt
		Rpl9
		Rabggtb
		Prpf8
		Cct3
		Tardbp
		Rps17
		Pdcd7
		Abce1
		Sympk
		Msmo1
		Pcna
		Snrpd1
		Osgep
		Rpl6
		Metap2
		Sprtn
		Deb1
		Psmb7
		Nfyb
		Nip7
		Rad1
		Mtor
		Polr2j
		Tcp1
		Wdr82
		Naa50
		Ino80
		Rps3
		Snap23
		Qars
		Etf1
		Sf3a1
		Eif3i
		Sf1
		Emc1
		Hinfp
		Gins2
		Brf1
		Tmx2
		Vmn2r40
		Dph3
		Wdr18
		Rps20
		Rars
		Trappc11
		Ddx10
		Psma3
		Supt6
		Vmn1r107
		Ska2
		Eif2b3
		Cenpo
		Top2a
		Polr3d
		Rps5
		Tsr1
		Utp6
		Zw10
		Sepsecs
		Ftsj3
		Gpn2
		Clns1a
		Copg1
		Pgm3
		LOC100861615
		Naa15
		Trappc4
		Hist1h2bk
		Cdipt
		Rps25
		Actl6a
		Rpl36
		Ppan
		Tmem199
		Cse1l
		Nop2
		Kansl2
		Cdc23
		Sf3b1
		Taf2
		Cdan1
		Dpy30
		Bysl
		Cpsf4
		Gtf2h2
		Slc39a7
		Wdr5
		Cct8
		Mcm2
		Hist1h3g
		Znhit2
		Snrpf
		Ttk
		Exosc2
		Gapdh
		Eif5a
		Pop4
		Polr2g
		Tex10
		Ddx27
		Chek1
		Sf3b5
		Elp6
		Fcf1
		Sys1
		Ddost
		Hist1h3e
		Gtpbp4
		Vars
		Tars
		Lin52
		Rps2
		Rpl27a
		Exosc9
		Rps11
		Glrx3
		Tubb5
		Psmb6
		Pole2
		Nhp2l1
		Rpl15
		Eif2b5
		Pfas
		Mis18bp1
		Rpl7a
		Dcaf13
		Rrp7a
		Nhlrc2
		Hars
		Dhx33
		Snrpd3
		Orc5
		Snrnp35
		2410131K14Rik
		Smarcb1
		Dhfr
		Rpf2
		Dhx8
		Thap11
		Zbtb8os
		Timm23
		Toe1
		Fam50a
		Pgd
		Wdr70
		Dars
		Yeats4
		Paics
		Pcid2
		Vmn1r183
		Puf60
		Bub3
		Umps
		Rtel1
		Rbx1
		Scap
		Ppil1
		Ankle2
		Rpl10a
		Sf3a3
		Psma1
		Rpl18a
		Rpl38
		Tbca
		Wdr25
		Gtf2h4
		Mob4
		Atad3a
		Gemin5
		Eapp
		Ints4
		Gemin6
		Pgk1
		Abcf1
		Gm4567
		Rcc1
		Ppil4
		Srp9
		Psmd14
		Msto1
		Polr3f
		Hist1h2ac
		Pfdn5
		Rps27
		Mars
		Pole
		Rpa1
		BC052040
		Mcm4
		Ap2b1
		Grb2
		Kat8
		Ap2s1
		Kpnb1
		Fnta
		Nup160
		2022-09-07
		Polr2e
		Golt1b
		Cirh1a
		Snrpa1
		Rps3a1
		Hist1h2ag
		Rft1
		Pkm
		Pold1
		Prim2
		Smc4
		Ints9
		Rpl31
		Rae1
		Smc1a
		Cmpk1
		Eif4a3
		Nudt21
		Exosc8
		Txnl4b
		Ttc1
		Slc7a11
		Aasdhppt
		Rpl23
		Hspa9
		Ndufab1
		Ppie
		Pfdn6
		Mfap1b
		Vmn1r143
		Elp4
		Timm10
		Sars
		Txnl4a
		1810026J23Rik
		Polr3a
		Pdrg1
		Prdm10
		Nubp2
		Rps4x
		Gart
		Rrp9
		Kif11
		Rps24
		Lsm6
		Psma7
		Atp6v1g1
		Sod1
		Snrnp70
		Anapc5
		Lsm8
		Rnpc3
		Rpl3
		Rpap1
		Gtf2a2
		Rps9
		Arpc4
		Snrnp40
		Eefsec
		Junb
		Gtf2h3
		Polr3h
		Utp23
		Alg2
		Cdk9
		Mbtps1
		Psmb3
		Hspd1
		Nop10
		Gmps
		Mcm7
		Slmo2
		Oxa1l
		Ddx47
		Cmtr1
		Rpl17
		Ndor1
		Cars
		Hist1h2ai
		Skp1a
		Ptbp1
		Hist1h2ap
		Utp18
		Kars
		Uba52
		Rps16
		Cdt1
		Fbl
		Dync1h1
		Srsf7
		Terf1
		Pabpn1
		Lars
		Cstf1
		Fdxr
		Srsf1
		Kctd10
		Polr2d
		Vps25
		Pak1ip1
		Eif3f
		Rpa2
		BC061237
		Ngdn
		Nop58
		Atp6v1b2
		Nxf1
		Rps13
		Dohh
		Vhl
		Rps29
		Dhps
		Mybl2
		Ints7
		Smc2
		Lsm4
		Uso1
		Phb2
		Sephs2
		Wdr74
		Scfd1
		Lsm11
		Cdk7
		Adsl
		Gnl3
		Pggt1b
		Mcrs1
		Eif5b
		Supv3l1
		Gfpt1
		Hnrnpa1
		Psma5
		Fen1
		Psmd4
		Trrap
		Fam96b
		Sf3b2
		Ubtf
		Cog2
		Pcyt1a
		Ncbp2
		Mocs3
		Sf3b3
		Rint1
		Rrm1
		Ggps1
		Rps26
		Eaf1
		Tubg1
		Anapc11
		Eprs
		Wars
		Rad17
		Sec61a1
		Nle1
		Mcm5
		Bud13
		Krr1
		Ppp1r8
		Cenpa
		Ddx23
		Rrp12
		Gspt1
		Psmb2
		Triap1
		Iscu
		Ruvbl1
		Prmt5
		Birc5
		D2Wsu81e
		Rpl35
		Bms1
		Btf3
		Ccnh
		Nkap
		Ddx49
		Dhx38
		Vmn2r41
		Mat2a
		Aars
		Rpl11
		Atl2
		Cdc16
		Copb2
		Amd1
		Pafah1b1
		Cltc
		Nxt1
		Rpl12
		Rpl4
		Mad2l1
		Nrf1
		Lyrm4
		Psmc1
		Orc6
		Cenpk
		Rsl24d1
		Hist1h2bp
		Vprbp
		Tuba1c
		Mis12
		Romo1
		Eif4e
		Polr2b
		Tipin
		Rpl19
		Aamp
		Ube2i
d10 d16 d18 d5 d8	60	Sin3a
		4930467E23Rik
		Psma2
		Dhrs7b
		Lsg1
		Hypk
		Pfdn2
		Wdr75
		Eif3c
		Cops6
		Eftud2
		Gm20604
		Drosha
		Polr3e
		Upf2
		Dimt1
		Imp4
		Atp5h
		Akirin2
		Dhx16
		Ncaph
		Emc8
		Nubp1
		Anapc4
		U2af1
		Ctdp1
		Wbp11
		Fxn
		Nifk
		Taf12
		Chchd4
		Seh1l
		Gps1
		Trappc1
		Gm8693
		Rps27rt
		Anapc2
		Bora
		Rpl21
		Fam210a
		Rps7
		Med11
		Heatr1
		Fam32a
		Asns
		A530032D15Rik
		Pwp1
		Tbcc
		Psmc5
		Taf1c
		Hist1h3b
		Ska1
		Nup107
		Ddx55
		Timm13
		Nup88
		Dolk
		Clp1
		Adat3
		Gm10406
d10 d16 d22 d5 d8	24	Cenph
		Ufd1l
		Ppp1r2
		Senp6
		Tbcb
		Emc6
		Ttc27
		Pold3
		Gm4175
		Eef1e1
		Atp6v0b
		Yrdc
		Vmn1r132
		Cdc37
		Emc3
		Mecr
		Pola1
		Ercc3
		Smarca4
		Atr
		Thoc1
		Slc25a37
		Eif3d
		Prelid1
d10 d18 d22 d5 d8	14	Ogdh
		Prpf6
		Psmd7
		Ints2
		Ddx46
		Gfer
		Nsl1
		Zpr1
		Cdc123
		Trmt6
		Phb
		Hist1h4h
		Polr1b
		Psmg3
d16 d18 d22 d5 d8	14	Ahctf1
		Ppp1r11
		Vmn1r119
		Wee1
		Trp53rk
		Ebna1bp2
		Nup85
		Wdr36
		Arpc3
		Aurkb
		Noc3l
		Prkrir
		Sfpq
		Ctr9
d10 d16 d18 d22 d5	14	Snip1
		Egfr
		Cops4
		Atic
		Pola2
		Ppp1cb
		Dkc1
		Sos1
		Ckap5
		Uba3
		Psmd6
		Tonsl
		Pmf1
		Gm5796
d10 d16 d18 d22 d8	165	Supt4a
		Mrpl18
		Ctps
		Arih1
		Odc1
		Dph6
		Mrpl57
		Smarce1
		Ddx21
		Pnpt1
		Trub2
		E2f3
		Atpaf2
		Mrps12
		Fam58b
		Dda1
		Rad51d
		Mrpl35
		Mrpl11
		Idi1
		Sacm1l
		Gfm1
		Mre11a
		Cog7
		Rfk
		Hsp90b1
		Dclre1b
		Ppp2ca
		Ctcf
		Cars2
		Hist1h3d
		U2surp
		Wdr77
		Mcat
		Rad51
		Lars2
		H2afz
		Cwf19l1
		Glrx5
		Kcnk7
		Eif3a
		Mtpap
		Smc6
		Leng1
		Ext1
		Srbd1
		Qrsl1
		Mrps27
		Mrpl52
		Shoc2
		Ssb
		Mtg2
		Fars2
		Ap1m1
		Mrpl55
		Dnajc2
		Mfap1a
		Pdcd5
		Sap18
		Vmn1r126
		Surf6
		Srp54b
		Cdc20
		Eral1
		Mrpl23
		Pgrmc2
		Urm1
		Mogs
		Tprkb
		Polrmt
		Chtf8
		Dph5
		Mrps21
		Atp6v1f
		Naf1
		Zcchc9
		Acly
		Ssbp1
		Mybbp1a
		Mrpl10
		Hnrnpa3
		Atf4
		Ppp2r2a
		Wbscr16
		Sdhc
		Pdcd2
		Vps29
		Mrpl15
		Peo1
		Stard7
		Hsd17b10
		Yars2
		Zfp600
		Dcps
		Olfr1431
		Lonp1
		Pole4
		Mtx2
		Cdc6
		Gm3500
		Rad50
		Mrpl39
		Arfrp1
		Lamtor2
		Sub1
		Fntb
		Mrps25
		Rragc
		Rpl28
		Ppp6c
		Mrpl16
		Nae1
		B3gat3
		Slc35a3
		Aars2
		Rpp30
		Ikbkap
		Dicer1
		Dph2
		Tceb2
		Dhx35
		Pelo
		Gtf3a
		BC055324
		Pstk
		F8a
		Olfr380
		Ercc6l
		Mup8
		Ctu2
		Mms22l
		Rraga
		Mipep
		Lamtor4
		Oxsm
		Hacd2
		Vrk1
		Igf1r
		Spop
		Pinx1
		Fcho2
		Itgb5
		Ppil2
		Pars2
		Slc2a1
		Znhit3
		Mrpl43
		Usp7
		Mars2
		Rbm17
		Spns1
		Actr6
		Actr8
		Cenpp
		Arglu1
		Ppp2r3c
		Gm8765
		Arpc2
		Bloc1s1
		Ube2n
		Sbds
		Dars2
		N6amt1
		Vkorc1l1
		Sdhb
d10 d16 d5 d8	39	Gtf2e2
		Utp20
		Ddx24
		Orc3
		Eif3m
		Nudcd3
		Npm1
		Trnt1
		Ints3
		Bub1
		Rac1
		Mrpl44
		Sde2
		Gm4836
		Cks2
		Hist1h3a
		Psmg4
		Tra2b
		Ddx41
		Gm5891
		Ddx18
		Fip1l1
		Nelfb
		Spdl1
		Timm17a
		Nrde2
		Rpn2
		Nop14
		Atp5j2
		Timm44
		Nol11
		Mak16
		Pgam1
		Atp5c1
		Ccdc115
		Ssrp1
		Atp5a1
		Yae1d1
		Cstf3
d10 d18 d5 d8	11	Med4
		Rpp25l
		Dusp12
		Rfc3
		Spcs3
		Gabpb1
		Rrp15
		Gpkow
		Card10
		Mrpl24
		Med20
d10 d22 d5 d8	10	Dmap1
		Gm3701
		Dctn2
		Imp3
		Vmn1r149
		Mastl
		Cpsf1
		1110037F02Rik
		Chordc1
		Exoc8
d16 d18 d5 d8	3	Vmn1r148
		Mrpl27
		Gemin7
d16 d22 d5 d8	1	Taf8
d18 d22 d5 d8	2	Txnrd1
		Spata5
d10 d16 d18 d5	6	Rbm39
		Gtf2h1
		Pomp
		Bard1
		Gemin2
		Mrpl20
d10 d16 d22 d5	2	Samm50
		Nsfl1c
d10 d18 d22 d5	1	Wdr92
d16 d18 d22 d5	7	Psmd11
		Prpf4
		Hist1h2ab
		Preb
		Gcn1l1
		Eif3b
		Mis18a
d10 d16 d18 d8	20	Mrpl38
		Cox7b
		Zfp207
		Rpusd4
		Eny2
		Ept1
		Uhrf1
		Haus1
		Mrpl49
		Ddx39b
		Dctn4
		Nars2
		Sae1
		AU019823
		Cd2bp2
		Pnkp
		Gng5
		Mrpl22
		Tufm
		Vmn2r48
d10 d16 d22 d8	11	Ncapg2
		Rab1
		Eif3h
		Vars2
		Mrps6
		Hist2h3c1
		Wars2
		Gm10408
		Ticrr
		Gpi1
		Vps35
d10 d18 d22 d8	5	Psmg2
		Hist1h3c
		Mrps34
		Ptar1
		Gnl3l
d16 d18 d22 d8	14	Wrap53
		Ocrl
		Srrd
		Rnps1
		Strip1
		D19Bwg1357e
		Rpf1
		Cep120
		Naa35
		Pa2g4
		Nckap1
		Rpl29
		Mrpl53
		Nsmce1
d10 d16 d18 d22	36	Faf2
		Amfr
		Cnot10
		Haus2
		Hist1h2ak
		Ints6
		Uqcrfs1
		Rpp14
		Mcl1
		Xrcc3
		Mrps7
		Ube2m
		Actb
		Dhodh
		Tfb1m
		Ttc4
		Ctnnbl1
		Fpr2
		Usb1
		Trim28
		Dnajc9
		Mrpl34
		Lsm12
		Ppa2
		Eftud1
		Fosl1
		Traip
		Rras2
		Ireb2
		Hnrnpc
		Ccar1
		Zc3h3
		Kti12
		Polg2
		Ndrg3
		Pmvk
d10 d5 d8	101	Phax
		Pdgfrb
		Med28
		Dis3
		Atxn10
		Gm10662
		Rpp38
		Hnrnpk
		Nat10
		Gm6460
		Ddx42
		Nudc
		Nol12
		Suds3
		Ncdn
		Rrp36
		Srp54a
		Haus4
		Polr1e
		Supt5
		Gars
		Nus1
		Med17
		Srsf2
		Zfp407
		Cope
		Sec22b
		Psmd1
		Tsr2
		Cul1
		Atp6ap1
		Mvd
		Gemin8
		Chmp4b
		Gm5458
		Gm13279
		Rtbdn
		Snf8
		Urb1
		Mnat1
		Psmd3
		Ppwd1
		Mcm6
		Brf2
		Mepce
		Sbno1
		Gm6902
		Hgs
		Gm1979
		Ipo13
		Atp6v1c1
		Pno1
		Ppp2r1a
		Rapgef6
		Guk1
		C330021F23Rik
		Mdn1
		Gltscr2
		Rtfdc1
		Vps13d
		Crnkl1
		Cdca8
		Cops3
		Gm15097
		C130026I21Rik
		Ddb1
		Slc7a6os
		Gm17019
		Cpsf2
		Srpr
		Efr3a
		Cops8
		Gins4
		Erh
		Ptdss1
		Nolc1
		Snrnp27
		Ilf2
		Pelp1
		Taf5
		Alyref
		Tfdp1
		Grpel1
		Med8
		E4f1
		Ubl5
		Letm1
		Dctn5
		Anapc1
		Tubgcp2
		Gm15319
		Hjurp
		Nol6
		Gm13871
		Timm50
		Cyfip1
		Gm14345
		Mcm3ap
		Fdx1l
		Cep350
		Rapgef1
d16 d5 d8	1	Nipbl
d18 d5 d8	1	Vmn2r44
d22 d5 d8	5	Sec13
		Psmb5
		Haus5
		Incenp
		Nup155
d10 d16 d5	5	Chd8
		Gm8300
		Srcap
		Ppp1r12a
		Brix1
d10 d18 d5	2	Sgol1
		Utp11l
d10 d22 d5	2	Gm10413
		Nop56
d16 d18 d5	4	Magea1
		Vmn1r95
		Tubgcp6
		Tgs1
d16 d22 d5	3	U2af2
		Psmd8
		Zfp143
d18 d22 d5	1	2810004N23Rik
d10 d16 d8	18	Strap
		Cept1
		Mrpl48
		Hist1h2ad
		Ing3
		Mrpl14
		Ifna1
		Ttc14
		Brap
		Cox17
		1110008L16Rik
		Mrpl19
		Esco2
		Tyms
		Gm5797
		Slc25a26
		Cherp
		Chchd3
d10 d18 d8	4	Mrpl28
		Sec61g
		Ext2
		Nuf2
d16 d18 d8	5	Ttf2
		Vac14
		Emc7
		Chaf1a
		Fdps
d16 d22 d8	1	Aagab
d18 d22 d8	2	Vps33a
		Exoc1
d10 d16 d18	5	Cycs
		Recql4
		Txndc17
		Uqcrc1
		Opa1
d10 d16 d22	5	Lig3
		Hbs1l
		Rnasek
		Taf11
		Tmem208
d10 d18 d22	5	B3galt6
		Exoc5
		Mrpl54
		Cul2
		Dolpp1
d16 d18 d22	57	Gtf3c5
		Luc7l2
		Sptlc2
		Rab3gap2
		Rnaseh2c
		Vps41
		Atad5
		Larp7
		Icmt
		Paxip1
		Stub1
		Rab10
		Vps11
		Htt
		Ncor2
		Sass6
		Dph1
		Cops2
		Rex2
		Gm3238
		Pqbp1
		Pfdn4
		Cep97
		Pik3ca
		Uqcc2
		D8Ertd738e
		D10Wsu102e
		Gpaa1
		Vps16
		B4galt7
		Commd5
		A130010J15Rik
		Tiprl
		Rabl3
		Alg13
		Ube2g2
		Mgat1
		Mios
		Rnaseh2a
		Huwe1
		Coa7
		Chmp3
		Adss
		Rrs1
		Srebf1
		Furin
		H2afx
		Vmn1r139
		Ric1
		Ccdc130
		Ncapg
		Ppp2r4
		Ptk2
		Osbpl9
		Usp5
		Eif3k
		Slc12a9
d5 d8	45	Gm13275
		Donson
		Gle1
		Ska3
		Mcmbp
		Psmd2
		Ifnz
		Psmc4
		Timm22
		Chchd2
		Gemin4
		Mzt1
		4930555G01Rik
		Rad54l2
		Vmn2r42
		Bap1
		Med7
		Twistnb
		Ncaph2
		Krtap4-13
		Nop16
		Nufip1
		Nploc4
		Trappc8
		Nup62
		Med22
		Lsm3
		Haus8
		Znrd1
		Sbpl
		Rpain
		Gm7978
		2700062C07Rik
		Setd1a
		Rnf40
		Stx5a
		Tada2a
		Pprc1
		Dctn1
		Gtf2f1
		Ttf1
		Gm5728
		Gnai2
		Atp5b
		Sart3
d10 d5	9	Osbp
		Uqcrc2
		Gins3
		Npat
		Ndc80
		Rnmt
		Gm15284
		Haus3
		Tti2
d16 d5	4	Tuba1a
		Gm4307
		Ecd
		Aqr
d18 d5	4	Snrnp48
		Tubgcp4
		Ccdc86
		Slu7
d22 d5	5	Trmt5
		Ptpn23
		Rab8b
		Ipo7
		Ubr5
d10 d8	50	Gatb
		Impdh2
		Uri1
		Emc4
		Arf1
		Mrps2
		Mup1
		Mrpl41
		Med31
		Tars2
		Vps51
		Mrpl37
		Tfb2m
		Ostc
		Flcn
		Actr10
		LOC100048884
		Hist1h2ah
		Mrps26
		Mcm10
		Yeats2
		Cox15
		Sumo2
		Mrps18a
		Ndnl2
		Parn
		Cwc25
		Smg1
		Osmr
		Gm5622
		Lin54
		Cluh
		Ppih
		Ncapd2
		Smarcc1
		Gtf3c6
		Zmat2
		Chp1
		Rad21
		Rpp40
		Bub1b
		Tmem242
		Mrps16
		Eif2ak4
		Mrpl12
		Get4
		Mrps11
		Mrpl46
		Rrp8
		Mrpl51
d16 d8	5	Gar1
		Pi4ka
		Gm1993
		Kif18b
		Uchl5
d18 d8	3	Hspa14
		Gm14440
		Bcar1
d22 d8	5	Gm14308
		2022-03-05
		Crk
		Mta2
		Kmt2b
d10 d16	8	C1d
		Kpna6
		Zfp131
		Nrbp1
		Psmg1
		Rabif
		BC005624
		Rpe
d10 d18	5	Nsa2
		Hist1h4d
		Blm
		Mcph1
		Mup9
d10 d22	3	Inpp5a
		Flad1
		Ccdc137
d16 d18	12	Stt3a
		Hspa13
		Crkl
		Srp68
		Tbl1x
		Anln
		Rnf2
		Rad51c
		Fam195a
		Ezh2
		Wdr48
		Gpcpd1
d16 d22	16	Exosc1
		Otud5
		Rbm25
		Gps2
		Tmem147
		Taf13
		Rab7
		Inpp5k
		Gm3558
		Cdc7
		Mau2
		Cdx2
		Trmt10c
		Bola2
		Gm5662
		Speer4c
d18 d22	21	Cd3eap
		Dld
		Vmn1r151
		Nsmce4a
		Gab1
		Ebp
		Setd2
		Xrn1
		Vps52
		Ubr4
		AA792892
		Plk5
		Xrcc2
		Prpf39
		Olfr620
		Rplp1
		Prmt7
		Pus3
		Ddx1
		Kdm4a
		Raf1
d5	94	Rps19bp1
		Alg11
		Gm10220
		Cdc27
		Myl12a
		Hist1h4m
		Taf7
		Gbf1
		Cactin
		Rbm33
		Gm14347
		Wrnip1
		Cdca5
		Gm10147
		Gm11569
		Rtf1
		Bet1l
		Cad
		Hist2h2ac
		Rbm12b1
		Amd2
		Gml
		Tpr
		Vmn1r91
		Cyc1
		Ugt1a1
		Srprb
		Psmd12
		Nup214
		Thoc2
		Kri1
		Vps72
		Tln1
		Gtf2e1
		Copb1
		Tsen54
		H2-Q6
		Dbf4
		Zswim7
		Casp8ap2
		Med21
		Mapk6
		1110004E09Rik
		Htatsf1
		Atp5e
		Cdk11b
		Znhit6
		Vmn1r122
		Tbp
		Gm15107
		Nvl
		Kpna2
		Gon4l
		Cwf19l2
		Lce1i
		Ampd2
		Rpa3
		Gnl2
		Ccdc174
		Usp10
		Gm10471
		Setd5
		Gm8653
		Sp140
		Zfp830
		Pcf11
		Caml
		Hcfc1
		Isy1
		Zbtb11
		Sap30bp
		Nol8
		Zfr
		Zcchc7
		Xrn2
		Shfm1
		Zc3h8
		Las1l
		Lage3
		Iars2
		Rbm14
		Hnrnpu
		Med16
		Dgcr8
		Uspl1
		Rps18
		Fam219b
		Vmn2r36
		Prpf3
		Gm3259
		Abcb7
		Gm4187
		Fbxo9
		Tsen2
d8	49	Amy2a5
		Samd1
		2310011J03Rik
		Skiv2l
		Sdhd
		Ipo5
		Tsfm
		Zzz3
		Wdr61
		Mrps33
		Casc5
		Fignl1
		Wdr1
		Amy2a2
		Taf6
		Slc25a28
		Nfyc
		Dynlt1f
		Becn1
		Polr2m
		Kntc1
		Wdr7
		Vmn1r11
		Tefm
		Med18
		Terf2
		Gm21002
		Mrpl36
		Gm2863
		Mrps18b
		Atp5k
		Sars2
		Gm16513
		Cog4
		Fbxo5
		Ice1
		Smco3
		Gm10104
		Chmp5
		Clasrp
		Mettl3
		Olfr92
		Nob1
		Sec63
		Cenpu
		Arpp19
		Hdac2
		Dctd
		Vmn1r21
d10	39	Dctn3
		Cox11
		Ttc39c
		Vwa9
		Topbp1
		Ints5
		Spin2d
		Rbbp8
		Med14
		Mrps24
		Rab6a
		Rpl27
		Med26
		5031410I06Rik
		Gm5795
		Mrps17
		Hyls1
		Dnaaf5
		Zbtb7a
		Jtb
		Nsun4
		1810022K09Rik
		Malsu1
		Adam39
		Chd4
		Rbmxl1
		Polg
		Rgs9
		Ssr2
		Gtf3c4
		Ptma
		Omt2b
		Snrpc
		Hist2h3b
		BC107364
		Setdb1
		Mphosph6
		Gm11237
		Arid1a
d16	38	Olfr1048
		Fbxw11
		Pdcl
		Hist1h4k
		Pet117
		Kin
		Ccdc132
		Pgls
		Ylpm1
		Zwilch
		Nsun2
		Ncl
		Mettl1
		Commd6
		Vmn1r115
		Ascc3
		Psg19
		Nfya
		Gm3139
		Ankrd11
		Mrpl2
		Mlst8
		Hsp90ab1
		Dnttip1
		Nsmce2
		Acd
		Ubb
		Mrpl17
		Prkcg
		Rhog
		Pex6
		Myo1c
		Mfn2
		Lman2l
		Orc2
		Dph7
		Kmt2a
		Aar2
d18	20	Ccdc55
		Asun
		Nudt13
		Ftl1
		Wdr59
		Extl3
		Sap130
		Zfp574
		Ctdnep1
		Thoc7
		Sec62
		Ubc
		Rbbp5
		Brpf1
		Fermt2
		Usp37
		Cox16
		Papd7
		H2afj
		Dpf2
d22	44	Cdca3
		Snx9
		Rnaseh2b
		Fh1
		Ten1
		Smn1
		Nufip2
		Nelfa
		Gm4559
		Edem3
		Rptor
		Katnb1
		Vmn2r78
		Dido1
		Wdr83
		Cops5
		Keap1
		Nadk2
		Hnrnpf
		Papss1
		Smg5
		Nedd4
		Socs1
		Vmn1r54
		Tmem2
		Tinag
		Pex1
		Snapin
		Vmn1r100
		Tlcd1
		Pkn2
		Tceb1
		Olfr1204
		Syt1
		Bnip1
		Nbas
		Ccdc6
		Arhgef12
		Pnpo
		Ost4
		Noc2l
		Kif23
		Tssk1
		Mtbp

## Sheet: Normoxia 2D-positive
Names	total	elements
d10 d16 d18 d22 d5 d8	12	Gpr137b
		Itgb1
		Ep300
		Psg23
		Pten
		Cdkn2a
		Olfr342
		Olfr1247
		Olfr1123
		7420461P10Rik
		Mib2
		Spats2
d10 d16 d18 d5 d8	2	Ankrd34a
		Nrbf2
d10 d18 d22 d5 d8	1	Olfr110
d16 d18 d22 d5 d8	1	Cacna1s
d10 d16 d18 d22 d5	1	Slc4a4
d10 d16 d18 d22 d8	14	Tbc1d24
		Vgll4
		Aida
		Sox9
		Tecr
		Lztr1
		Scarb1
		Klrc3
		Clnk
		Bcl2l11
		Ambra1
		Ifrd1
d10 d16 d5 d8	10	Cblb
		Cbln2
		Ctsm
		N4bp3
		Ccdc101
		Mansc4
		BC048403
		Efnb1
		Olfr412
		Anxa3
d10 d18 d5 d8	1	Cnot8
d16 d18 d5 d8	1	Cyp2c55
d10 d16 d18 d5	1	Ppm1b
d16 d18 d22 d5	1	Dpp9
d10 d16 d18 d8	7	Hmbs
		Rock2
		Llgl1
		Lrrc73
		Alas1
		Nprl2
		Zfp804a
d10 d18 d22 d8	1	4921524L21Rik
d16 d18 d22 d8	5	CAGE.control.g48883
		Fech
		Ifna15
		Ywhab
		Fam124a
d10 d16 d18 d22	18	Spint5
		Cd209e
		4930579F01Rik
		Lgals12
		Cerk
		Eif1ax
		Mospd2
		Med9
		St3gal5
		Tsc1
		Cs
		Idh2
		Zmynd8
		H2-T24
		Mpc1
		Lmna
		Slc12a2
d10 d5 d8	24	Slc35e4
		Tmem19
		Cyp4b1
		Tspan7
		Cxcr4
		Olfr350
		CAGE.control.g66395
		Tcl1
		Ergic1
		Prdm2
		Amtn
		Mroh1
		Mcfd2
		Gpld1
		Abracl
		Sapcd1
		CAGE.control.g65744
		Olfr1239
		Hsh2d
		Scfd2
		Uqcc3
		Olfr187
		Rnase11
		Zkscan2
d16 d5 d8	1	Olfr119
d10 d16 d5	1	Atg16l2
d16 d18 d5	1	Eln
d18 d22 d5	5	Xcl1
		Med15
		Myt1l
		Mroh5
		Tfap2e
d10 d16 d8	17	CAGE.control.g70357
		Defb37
		Tcfl5
		Psg18
		Armc2
		Faf1
		Bglap2
		Trdn
		Mrgprb1
		Casc4
		Arid5b
		Tectb
		Cpox
		Ccz1
		Tsc2
		Olfr715
		Ddit4
d16 d18 d8	2	Pias3
		Lrrtm3
d16 d22 d8	2	Cwh43
		Il1rl2
d18 d22 d8	1	Chst15
d10 d16 d18	9	Atpaf1
		Mei4
		Fpr1
		Trp53
		Olfr723
		Fbxl20
		Rab24
		Agrn
		Olfr1211
d10 d16 d22	2	Olfr1242
		Zbtb24
d10 d18 d22	3	Zfp84
		Nupr1l
		Ap1s2
d16 d18 d22	50	Slc25a10
		Bend5
		Mdk
		Gm20738
		Nkiras1
		3110002H16Rik
		CAGE.control.g7754
		Ccdc163
		Olfr1241
		Olfr23
		Tmtc1
		Akr1c14
		Degs1
		Olfr935
		Tmem186
		Olfr558
		Pdhx
		Med23
		CAGE.control.g62007
		Mcpt1
		Fam101b
		Blzf1
		Gm14501
		Rab33b
		Bmp1
		Vma21
		Rcvrn
		Nsun3
		Gm13154
		CAGE.control.g6039
		Aqp6
		Kank2
		Hsd17b7
		CAGE.control.g23019
		Trit1
		Olfr1270
		Irf2bp1
		Kctd3
		CAGE.control.g20149
		Col6a5
		CAGE.control.g39591
		Syt10
		CAGE.control.g22103
		Dusp28
		Fkbp1a
		2810474O19Rik
		Olfr339
		Ddhd2
		Nipsnap1
		Rrad
d5 d8	17	Fmnl1
		Dab2ip
		Tmtc4
		Sema4g
		Hsd17b2
		CAGE.control.g50639
		Glipr2
		Bbs5
		Ugt1a6a
		Hus1b
		Itgb2
		Gldn
		Vmn1r206
		Pfkm
		Zfp952
		Spryd3
		Slc11a2
d10 d5	14	Tagln2
		Acot9
		Abhd14a
		Cryl1
		Gtdc1
		Pcp2
		Ror1
		Ssxb9
		Mlxipl
		Efcab2
		Tmem71
		Cxcr6
		CAGE.control.g61595
		Cers3
d16 d5	7	Tbpl2
		Ormdl2
		Dapk3
		Pcdhb10
		Vmn1r234
		Unc80
		Krtap27-1
d22 d5	3	Cyp4f13
		Dnah5
		Olfr593
d10 d8	64	Svep1
		Lyve1
		Shroom2
		Gm5538
		Mon1b
		Daam2
		Slc7a8
		Krt84
		4933405L10Rik
		Bbc3
		Gsr
		Hnrnpm
		Plekhh3
		Tnfrsf23
		Mroh8
		Ralgps1
		Cartpt
		Ces1a
		Reg3a
		Tpbpb
		Cd180
		Erich6
		Tat
		Skint4
		Ctnna3
		Pam
		CAGE.control.g70147
		Bbs12
		Nfia
		Rlbp1
		Slc4a2
		Sdhaf1
		Rtl1
		Casp1
		Proz
		Tmem110
		Ankrd13c
		Alox8
		Gpr75
		AA467197
		Egfl8
		CAGE.control.g30460
		5830411N06Rik
		CAGE.control.g34415
		4833420G17Rik
		Dnah2
		Satb1
		Otos
		Prl3a1
		Stxbp1
		Lypd6
		Dpysl2
		Il27
		Cplx4
		Olfr1122
		Rcor1
		Olfr571
		Phospho2
		Apol10b
		Adgre1
		Lekr1
		CAGE.control.g70062
		Rbp2
		Serpina12
d16 d8	7	Gpr83
		Nr2e3
		Hopx
		Zfp61
		Fam168b
		Fcer1a
		Lrrc36
d18 d8	1	Sufu
d22 d8	3	CAGE.control.g64
		Kcng3
		Acpt
d10 d16	11	Vwa3a
		Dmrta1
		Mthfd2l
		Asb8
		4921507P07Rik
		Sgol2a
		Ier5
		Gm7073
		Olfr609
		Maged1
		Psen2
d10 d18	2	Adamtsl5
		Olfr1316
d10 d22	1	Macrod1
d16 d18	21	Hrasls
		Olfr736
		Synpo2l
		Upf3a
		Tiam1
		Ly6c1
		Mog
		Gsk3b
		Fabp1
		Myh9
		Serpinb9
		Prkd3
		Cdkn1c
		Ift52
		Ptges3
		Spo11
		Il12rb1
		Bola3
		Tmem63c
		Naip2
		Mgl2
d16 d22	4	Gne
		CAGE.control.g41989
		Mybpc2
		Med19
d18 d22	46	Fbxo22
		Med12
		Gpr142
		Llgl2
		Stk40
		Fancd2os
		Tmem200c
		Morc1
		CAGE.control.g72916
		Ncmap
		Mdh2
		Cab39
		Olfr322
		Rasgrp2
		Pard3
		1700015F17Rik
		Cenpb
		Fezf2
		CAGE.control.g48557
		Impg1
		Tfpi
		Cyp2d22
		Ankra2
		Serpine3
		Gm13128
		Smok3b
		Atp10a
		Sik2
		CAGE.control.g54496
		Syde1
		Ndufa13
		Btn2a2
		Slco1a1
		Olfr980
		Fam122a
		4732456N10Rik
		CAGE.control.g23133
		Pygm
		Kdm4c
		Fhod3
		Olfr1046
		Vstm2b
		Myl6
		Palm2
		Ugt1a9
		Ctsw
d5	181	Popdc3
		Hiatl1
		Gal3st4
		Slc35d1
		Tmco3
		Rai2
		Prl8a9
		Olfr1045
		Lhx9
		AI467606
		CAGE.control.g33644
		Myo5c
		Dlgap5
		Trim8
		Il20rb
		Kidins220
		Slc16a13
		Phf21a
		Fam178b
		Pick1
		Trpc6
		Grifin
		Nfkb1
		Syngr1
		Gm13119
		Gm20594
		Olfr1450
		Golt1a
		Kcnc1
		Plod2
		Zfand2b
		Rab12
		Srek1
		Fam214b
		CAGE.control.g26262
		Gm20823
		Zfp759
		Slc38a6
		Khdrbs3
		Timp1
		CAGE.control.g15950
		CAGE.control.g27141
		Ilkap
		Klf3
		Lta4h
		Sigirr
		Ptafr
		Rhbdd2
		Dmtn
		Cib2
		Cfi
		Cass4
		Npy2r
		Egf
		Cdkal1
		2310057N15Rik
		Pcdha12
		Nipal1
		Klri2
		Caskin2
		Foxj1
		Atg3
		Wasf1
		Ash1l
		Olfr175-ps1
		Dbp
		Btbd6
		Olfr851
		9130401M01Rik
		CAGE.control.g63505
		Hrh2
		CAGE.control.g20276
		Lef1
		Nat1
		D8Ertd82e
		Prom1
		CAGE.control.g32740
		Pofut1
		Rp1l1
		2610301B20Rik
		Tagap1
		9430069I07Rik
		Fgf9
		CAGE.control.g61579
		CAGE.control.g68346
		Olfr823
		5430427O19Rik
		Snx17
		Pirt
		Klhdc9
		Arhgap31
		Sell
		Mpi
		CAGE.control.g76603
		Prepl
		Wnt7a
		Cstad
		Pate2
		Olfr1153
		Pcdh19
		Lrpprc
		D10Jhu81e
		Tspyl3
		Mmd2
		Zdhhc18
		Olfr853
		CAGE.control.g45091
		Phc2
		Dtx2
		Vmn2r79
		Pum2
		Uxs1
		Gjb1
		Gm1123
		Ptpn7
		Chml
		Zfyve28
		Gm2016
		Clec4d
		Kcna4
		Slc39a14
		Zfp169
		Glipr1l1
		Fgf12
		Whsc1l1
		Rabl2
		Fam198b
		Zfp575
		Apol11b
		CAGE.control.g2209
		Lama5
		Aplp2
		Lrrc10b
		Lamc1
		Kdm5c
		Cox6b1
		Srrm4
		Ccne1
		Svs3b
		C87499
		9330182L06Rik
		Tarbp2
		Htatip2
		Bdkrb2
		Pcdh15
		Nckap5l
		Bace2
		Zfyve1
		Zc3h4
		Kpna3
		Ctbp1
		D3Ertd254e
		Pla1a
		Chrnb4
		Oprd1
		Cep192
		Cryba4
		Cflar
		Vstm4
		Slc2a13
		1700029F12Rik
		Gpr173
		Rims2
		CAGE.control.g58466
		Ptpn3
		CAGE.control.g70994
		Slc27a1
		Prrg1
		Lrrtm2
		Tnfrsf9
		Upk1b
		Adgrb2
		Slc9b2
		CAGE.control.g45147
		Esm1
		Pafah2
		Pxk
		CAGE.control.g41463
		Lmod3
		Syndig1l
		Ogfrl1
d8	91	Kcnk2
		Hs6st3
		Jchain
		Hnf1a
		CAGE.control.g3262
		Wdr45
		Ube4b
		Trpm6
		Lipa
		Zfpm1
		Zp2
		Accsl
		Nrp2
		Sgk1
		Gstcd
		Neil2
		Tbc1d19
		Cdc37l1
		Rpgr
		Olfr215
		CAGE.control.g72215
		Cmtm2b
		Dnah9
		Mageb5
		Hypm
		Ppp1r36
		Slc35d3
		Gm5082
		Xpo6
		Mllt6
		Uba5
		Hps1
		Nras
		Arvcf
		Prl6a1
		Rag1
		Sbk2
		Jmjd6
		AI118078
		Rgmb
		Usp34
		Spata9
		Klhl30
		Dgkd
		Mamstr
		Serpina7
		Apba1
		Pmel
		Dmxl2
		Muc5ac
		Krtap17-1
		Pon1
		Asph
		Cers6
		Psmb11
		Abcc12
		Morc3
		Ythdc2
		Fam76a
		Defb42
		Tpcn2
		8430419L09Rik
		Col5a3
		Lamp3
		Mtrf1
		Gm5294
		CAGE.control.g4292
		Cnot6l
		CAGE.control.g75956
		1700001L19Rik
		G2e3
		Zfp758
		Pcnxl4
		Pdc
		Kel
		Arhgef1
		Olfr1093
		Zscan20
		Ttc30a2
		CAGE.control.g33117
		Acsm1
		Ttll9
		Zbtb18
		Defb12
		Id2
		Mapk11
		Hoxc5
		Tnfrsf13c
		Vmn2r70
		Ifi205
		Fbxo31
d10	76	Akap17b
		Tomt
		CAGE.control.g8797
		CAGE.control.g73523
		Hsd3b7
		Arhgap6
		Lyzl1
		Kpna1
		4931406B18Rik
		Ccdc169
		Cd2ap
		Tas2r125
		Dcn
		Slc25a11
		Nmnat3
		Prps1
		Dirc2
		Ppfibp2
		Olfr91
		Man2b2
		Dach2
		Hsd17b13
		Ufsp1
		Uck2
		Gstm4
		Tmem106b
		Olfr97
		Ttll5
		Map3k8
		Prss50
		Serpina6
		Igfbp6
		Sfxn1
		Evx2
		Ehhadh
		Pkd2
		Fgf1
		Hectd3
		Sall1
		Bod1l
		CAGE.control.g55140
		CAGE.control.g30124
		Olr1
		Cabin1
		Abhd12
		Zfp541
		CAGE.control.g18313
		Asb3
		Zfp51
		Vax2
		Dennd4a
		Gapt
		Hnrnpul1
		Usp15
		Fam227a
		Zfp961
		Olfr132
		Mfsd4
		Elavl2
		Zfp663
		Nkd1
		Adamtsl1
		Traf7
		4930505A04Rik
		Vmn1r44
		Tcn2
		Rax
		Lrrc42
		Mettl7a1
		CAGE.control.g32706
		Sntb1
		Tas2r106
		Napepld
		Olfr519
		Bmf
		Nrg4
d16	61	Slc26a9
		Siglech
		Cyp7b1
		I830012O16Rik
		Klk7
		CAGE.control.g48704
		Cald1
		Vmn1r184
		Ammecr1
		Wrn
		Cdk5
		Muc15
		Aicda
		Spef1
		Ubl3
		Klk6
		Setbp1
		2310039H08Rik
		Epb4.1l3
		Angel2
		Apeh
		Rfwd2
		Dgke
		Taar3
		Fra10ac1
		Gdnf
		Dsg1b
		Adck3
		Spg7
		Tada2b
		Usp22
		Adprhl1
		R3hdml
		Gata4
		Slc13a1
		Cox5b
		Adam11
		Sema5a
		Emp1
		Atp1a2
		Mt3
		Nprl3
		Itpr2
		9130008F23Rik
		Gfy
		Fgb
		Prok2
		Mmp12
		Olfr827
		Olfr376
		Gphb5
		Fnbp1l
		Adamtsl4
		Hivep2
		Pik3r1
		2310035C23Rik
		Gpm6a
		Elfn1
		Fbxo32
		Ttc9c
		Alpk1
d18	30	Gm13177
		Lancl2
		Sh3rf1
		Epb4.1l2
		Epcam
		Tfe3
		Mppe1
		Rap2b
		Cnot2
		Cep112
		Zfp369
		Asic1
		Soga1
		Thbs3
		Serpinb3c
		Ovol2
		CAGE.control.g71934
		Olfr31
		Kcnj13
		Mlc1
		Cyp11b1
		Tcf3
		Olfr906
		Hspa1b
		Olfr513
		Olfr541
		Kctd19
		Brsk1
		Olfr1089
		Ces2e
d22	53	Chchd5
		Tshz3
		Slc9c1
		Gpr174
		Zfp248
		Vmn1r25
		CAGE.control.g79637
		Slfn5
		Hic2
		Arpc5l
		Amn1
		Ppp2r2b
		Med1
		Olfr898
		Mill2
		Gbp9
		Arc
		Olfr1097
		Tmem161b
		Lysmd2
		Ppp3cb
		Olfr1412
		Trim2
		Mettl17
		4933430I17Rik
		Olfr209
		Fastkd2
		Bean1
		Asprv1
		Xdh
		9830107B12Rik
		Spesp1
		Basp1
		1500015O10Rik
		Pign
		Med29
		Egln3
		Atxn7l3
		Pcdha7
		Apol10a
		H2afy
		Gm13152
		Prss42
		Vmn1r178
		Nf1
		Cngb3
		Gm16451
		Olfr266
		Tcp11
		1110008F13Rik
		Akr1c21
		Vmn1r51
		Trim31

## Sheet: Hypoxia 2D-negative
Names	total	elements
d10 d13 d16 d19 d22 d3 d5	555	Hist1h3h
		Ruvbl2
		Copa
		Polr3c
		Psma4
		Rps6
		Rplp2
		Cenpn
		Max
		Dctn6
		Atp1a1
		Ahctf1
		Rbm22
		Cct2
		Atp6v1e1
		Rpl37
		Polr2i
		Sec13
		Hnrnpk
		Gm6460
		Nsa2
		Vmp1
		Pop1
		Polr2h
		Rpl24
		Wdr3
		Zmat5
		Nedd8
		Med31
		Eef2
		Sf3a2
		Rpl27
		Prc1
		Eif2s1
		Rfc4
		Eef1a1
		Cpsf3l
		Racgap1
		Psmc4
		Ran
		Rpl30
		Prpf6
		Rbm19
		Timeless
		Dmap1
		Vmn1r128
		Rps8
		Nop56
		Ykt6
		Vcp
		Exosc10
		Pola2
		Gm5148
		Gars
		Rpn1
		Psmc6
		Alg1
		Banf1
		Tut1
		Ppp1cb
		Srsf3
		Rpl26
		Nmd3
		Rpl5
		Mettl16
		Cdk1
		Polr2c
		Tuba1b
		Crcp
		Ptpn11
		Rps14
		Dhx37
		Chaf1b
		Mfap1a
		Gm4836
		Hist1h2ae
		Rps19
		Nol10
		Uba1
		Srp19
		Hist1h2an
		Dhdds
		Nubp1
		Lsm7
		Gmppb
		Eif6
		Rrm2
		Abt1
		Hist1h2ao
		Dnmt1
		U2af2
		Ik
		Nfs1
		Pwp2
		Farsb
		Polr2l
		Naca
		Ddx56
		Rpl37a
		Snrpg
		Urb1
		Eef1e1
		Cct7
		Rpl34
		Wbp11
		Gtf3c1
		Gm10922
		Vmn2r47
		Ndc80
		Dtymk
		Yars
		Pmpca
		Wdr36
		Cwc22
		Cenpc1
		Atp6v0c
		Exosc5
		Cdc45
		Brf2
		Rps27a
		Polr3b
		Ncbp1
		Gm2897
		Exosc4
		9030624G23Rik
		Hspa5
		Rpl13
		Polr1c
		Gps1
		Rangap1
		Psmc3
		Rpl9
		Rabggtb
		Cct3
		Rps17
		Pdcd7
		Abce1
		Pcna
		Psmb7
		Nip7
		Ipo13
		Tcp1
		Polr2j
		Sf3a1
		Sf1
		Hinfp
		Rps20
		Trappc8
		Pno1
		Psma3
		Supt6
		Ska2
		Eif2b3
		Ppp2r1a
		Rps5
		Gpn2
		Copg1
		Clns1a
		Trappc4
		Rpl36
		Nop2
		Cdc23
		Cdan1
		Cct8
		Mcm2
		Rpain
		Snrpf
		Exosc2
		Rpn2
		Gapdh
		Eif5a
		Ddx27
		Sf3b5
		Chek1
		Hist1h3e
		Exosc9
		Psmb6
		Rpl7a
		Hars
		Snrpd3
		Dhx33
		Rps7
		Rpf2
		Pola1
		Thap11
		Crnkl1
		Wdr70
		Dars
		Sfpq
		Med11
		Pcid2
		Bub3
		Ankle2
		Rpl10a
		Rpl18a
		Atad3a
		Eapp
		Rcc1
		Ppil4
		Psmd14
		Ctr9
		Hist1h2ac
		Rps27
		Mars
		Grb2
		Cpsf2
		Kat8
		Ap2s1
		Fnta
		Golt1b
		Cirh1a
		Polr2e
		Rps3a1
		Rae1
		Txnl4b
		Rpl23
		Haus3
		Mfap1b
		Psmd6
		Rrp9
		Vmn2r44
		Atp6v1g1
		Zbtb11
		Rpap1
		Psmc5
		Junb
		Polr3h
		Utp23
		Cdk9
		Mbtps1
		Pgam1
		Gmps
		Mcm7
		Hist1h3b
		Rpl17
		Nup107
		Skp1a
		Hist1h2ap
		Kars
		Rps16
		Cdt1
		Dync1h1
		Fbl
		Srsf7
		Kctd10
		Vps25
		Eif3f
		BC061237
		Rps13
		Dohh
		Ints7
		Wdr74
		Scfd1
		Med8
		Ncbp2
		Rps26
		Dctn5
		Exoc8
		Anapc11
		Eprs
		Sec61a1
		Nle1
		Mcm5
		Gnl3l
		Med20
		Krr1
		Ddx23
		Rrp12
		Psmb2
		Iscu
		D2Wsu81e
		Dhx38
		Mat2a
		Nxt1
		Rpl4
		Lyrm4
		Orc6
		Rsl24d1
		Aamp
		Rbm39
		Polr2a
		Igbp1
		Arcn1
		Psma2
		Chmp6
		Rpl23a
		Sdad1
		Trappc5
		Prpf31
		Nutf2
		Rfc2
		Snrpe
		Bop1
		Pfdn2
		Cpsf3
		Xpo1
		Atp6v1d
		Ufd1l
		Ap2m1
		Supt16
		Ect2
		Polr1d
		Pes1
		Exosc3
		Gm10662
		Snrpd2
		Lrr1
		Sacm1l
		Nat10
		Rpl14
		Ccdc94
		Rad9a
		Gpn1
		Xab2
		Espl1
		Rpsa
		Dync1i2
		Phf5a
		Ddx5
		Rplp0
		Tinf2
		Itgav
		Rpl7l1
		Psmb1
		Skiv2l2
		Dpagt1
		Hist1h3d
		Pam16
		Polr2f
		Usp39
		Prpf19
		Ints3
		Haus4
		Riok1
		Cenpw
		Cct4
		Rpl8
		Lsm2
		Gm1993
		Eif3a
		Psmd7
		Nup93
		Actb
		Supt5
		Actr2
		Aldoa
		Snupn
		Imp4
		Rac1
		Kat5
		Noc4l
		Trmt112
		Dhx16
		Psmb4
		Spc24
		Tfrc
		Ddx54
		Gnb2l1
		Cenpm
		Rps15a
		Snrnp200
		Magoh
		Eif1ad
		Sec22b
		Exosc7
		Psmd12
		Eif4a1
		Napa
		Rpl32
		Med30
		Cct5
		Dhx15
		Emg1
		Prim1
		Eif5
		Rps21
		Rpl10
		Hist1h3a
		Polr3k
		Dkc1
		Rpl35a
		Eif3e
		Farsa
		U2af1
		Exoc7
		Hspa8
		Gins1
		Wdr12
		Snrpb
		Polr1a
		Tnpo3
		Gm10408
		Atp6v0b
		Psmd3
		Tra2b
		Actr3
		Ddx18
		Dbf4
		Psma6
		Ppwd1
		Hist1h2bj
		Rps15
		Vmn1r149
		Nsl1
		Seh1l
		Lsm5
		Vmn1r148
		Fau
		Nars
		Rps23
		Iars
		Cdc73
		Pdcd11
		Taf8
		Plrg1
		Rps10
		Ckap5
		Rpl18
		Rfc5
		Zpr1
		Prpf8
		Nop16
		Snrpd1
		Rpl6
		Sprtn
		Deb1
		Spdl1
		Naa50
		Rps3
		Etf1
		Qars
		Eif3i
		Gins2
		Brf1
		Wdr18
		Ddx10
		Vmn1r107
		Top2a
		Rps27rt
		Ftsj3
		Hist1h2bk
		Rps25
		Actl6a
		Ppan
		C330021F23Rik
		Mdn1
		Taf2
		Bysl
		Slc39a7
		Znhit2
		Ttk
		Polr2g
		Ddost
		Gtpbp4
		Cdc6
		Tars
		Rpl27a
		Rps11
		Rpl21
		Tubb5
		Pole2
		Nhp2l1
		Rpl15
		Rrp7a
		2410131K14Rik
		Snrnp35
		Zbtb8os
		Yeats4
		Puf60
		Rtel1
		Rbx1
		Scap
		Gm10471
		Heatr1
		Sf3a3
		Phb
		Psma1
		Rpl38
		Ddb1
		Polr3f
		Smarca4
		Pole
		Rpa1
		Mcm4
		Asns
		Nup160
		Prim2
		Pold1
		Smc4
		Ints9
		Rpl31
		Smc1a
		Eif4a3
		Exosc8
		Pfdn6
		Sars
		Txnl4a
		Polr3a
		Pdrg1
		Prdm10
		Isy1
		Rps4x
		Mak16
		Kif11
		Rps24
		Rpl3
		Rps9
		Taf1c
		Psmb3
		Slmo2
		Ddx47
		Hist1h2ai
		Ddx55
		Uba52
		Pabpn1
		Srsf1
		Rpa2
		Nop58
		Atp6v1b2
		Nxf1
		Rps29
		Lsm4
		Psma5
		Psmd4
		Sf3b2
		Ubtf
		Ubl5
		Pcyt1a
		Haus5
		Letm1
		Sf3b3
		Hnrnpu
		Rint1
		Rrm1
		Tubgcp2
		Cenpa
		Gm15319
		Ruvbl1
		Ssrp1
		Bms1
		Rps18
		Rpl11
		Cdc16
		Eif3d
		Rpl12
		Yae1d1
		Nrf1
		Psmc1
		Polr1b
		Hist1h2bp
		Tuba1c
		Polr2b
		Gm10406
		Rpl19
		Ube2i
d10 d13 d16 d19 d3 d5	39	Eif2b2
		Eif3c
		Ddx3x
		Ptpn23
		Rrp1
		Pop7
		Nipbl
		Taf12
		Sf3b4
		Ccdc84
		Snapc4
		Cdc123
		Yrdc
		Hist1h3g
		Slc7a6os
		Rnpc3
		Taf5
		Tubg1
		Ddx49
		Cltc
		Supt4a
		Hist1h2bn
		Esf1
		Nsf
		Eif2b4
		Atp6v0d1
		Ctdp1
		Rbm8a
		Zswim7
		Atp6v1c1
		Noc3l
		Tex10
		Cdc7
		Srp9
		Ap2b1
		Vmn1r143
		Lars
		Wars
		Gm14345
d10 d13 d16 d22 d3 d5	13	Gemin8
		Snrpa1
		Hspa9
		Psma7
		Alg2
		Birc5
		Btf3
		Rps12
		Gle1
		Eif3m
		Ints2
		Cse1l
		Uspl1
d10 d13 d19 d22 d3 d5	11	Hist1h3f
		Trim28
		Ogt
		Tyms
		Timm23
		Prpf3
		Rps28
		Snapc1
		Wbscr22
		Lsm8
		Cars
d10 d16 d19 d22 d3 d5	7	Taf6
		Med7
		Tubgcp4
		Srpr
		Usp8
		Haus8
		Mcrs1
d13 d16 d19 d22 d3 d5	4	Imp3
		Nol12
		Ebna1bp2
		Rfc1
d10 d13 d16 d19 d22 d3	4	Vmn1r95
		Vmn2r40
		Ccna2
		Ptbp1
d10 d13 d16 d19 d22 d5	220	Gtf3c5
		Ssu72
		Wdr33
		Scd2
		Mcm3
		Dhrs7b
		Lsg1
		Acsl4
		Arih1
		Tsen15
		Oip5
		Dis3
		Anapc10
		Hscb
		Topbp1
		Trmt61a
		Orc3
		Eef1g
		Slc35b1
		Rpp14
		Dbr1
		Hmgcs1
		Atp6ap2
		Nudcd3
		Ppp2ca
		Ube2m
		Naa20
		Aldh18a1
		Slc3a2
		Rad51
		Pnn
		Csnk2b
		Nufip2
		Gak
		Taf1b
		Wrb
		Cope
		Ahcy
		Ctdnep1
		Tomm22
		Pfdn4
		Uxt
		Pyroxd1
		Mthfd1
		Armc7
		Dnaja3
		Pgrmc2
		Alg14
		Wdr92
		Bap1
		Fam98b
		Wdr73
		Rtcb
		Lamtor3
		Rab7
		Tardbp
		Mybbp1a
		Trappc1
		Metap2
		Txnrd1
		Mtor
		Dph3
		Vps29
		Cenpo
		Pgm3
		Cdipt
		Gtf2h2
		Cdc37
		Elp6
		Sys1
		Nhlrc2
		Arfrp1
		Cpsf1
		Paics
		Cops3
		Chordc1
		Pfdn5
		Atr
		Slc7a11
		Nubp2
		Erh
		Eefsec
		Exoc5
		Nop10
		Hspd1
		Ptar1
		Terf1
		Pak1ip1
		Uso1
		Gfpt1
		Fen1
		Ccdc115
		Rpe
		Cenpp
		Arid2
		Ndrg3
		Mad2l1
		Cstf3
		Tpt1
		Thoc3
		Bccip
		Nelfcd
		Strap
		Kdsr
		Hypk
		Kansl3
		Cnot10
		Srp72
		Hus1
		Ppa1
		Ints6
		Top3a
		Cops6
		Gm20604
		Pmpcb
		Prmt1
		Grwd1
		Tbcb
		Rgp1
		Snapc5
		Mettl14
		Rbbp4
		Hyou1
		Foxk1
		Top1
		Cwf19l1
		Wdr1
		Gtf3c3
		Snrnp25
		Shoc2
		Ciao1
		Ssb
		Eif2b1
		Pfn1
		Zwint
		Ldha
		Ipo11
		Dynlrb1
		Cul3
		Mvd
		Hsd17b12
		Tbcd
		Snapc2
		Ddx20
		Rpp21
		Txn1
		Ndnl2
		Kri1
		Ino80b
		Urm1
		Psmg4
		Nifk
		Hspe1
		Dut
		Ppat
		Telo2
		Hgs
		Samm50
		1110004E09Rik
		Hnrnpl
		Upf1
		Sympk
		Msmo1
		Osgep
		Rad1
		Wdr82
		Tmx2
		Sepsecs
		Guk1
		Nrde2
		Cpsf4
		Emc3
		Mecr
		Rtfdc1
		Orc5
		Sptlc1
		Smarcb1
		Dhfr
		Pgd
		Ppil1
		Tbca
		Gtf2h4
		Gemin5
		Gemin6
		Pgk1
		BC052040
		Rft1
		Nudt21
		Timm10
		Dlst
		Gart
		Gtf2h3
		Ska1
		Pus3
		Ndor1
		Cstf1
		Fdxr
		Xrn2
		Tonsl
		Dhps
		Sephs2
		Lsm11
		Rbm17
		Adsl
		Spns1
		Mocs3
		Sec63
		Cenpu
		Ggps1
		Hist2h3b
		Ppp1r8
		Ppp2r3c
		Prmt5
		Hist1h4h
		Ccnh
		Adat3
		Nol6
		Pafah1b1
		Fdps
		Romo1
d10 d13 d16 d3 d5	29	Alg11
		4930467E23Rik
		Dimt1
		Atp2a2
		Gosr2
		Zfp335
		Smu1
		Gm8693
		Tbp
		Polr3d
		Fcf1
		Rps2
		Gm17019
		Trrap
		E4f1
		Dnajc17
		Usp36
		Atp6v1a
		Smc3
		Thoc5
		Hist1h4n
		Cdk11b
		Tsr1
		Utp6
		Pop4
		Ndufab1
		Gm4305
		Mup9
		Prelid1
d10 d13 d19 d3 d5	11	Utp20
		Dna2
		Gpkow
		Foxp1
		Ddx24
		Pold2
		Ppp1r12a
		Rbbp5
		Wdr5
		Dcaf13
		Aars
d10 d13 d22 d3 d5	9	Gtf2e2
		Strip1
		Anapc4
		Tmem258
		Nploc4
		Dad1
		Ddx41
		Ciapin1
		Spcs3
d10 d16 d19 d3 d5	1	Trappc3
d10 d16 d22 d3 d5	2	Prpf38a
		Tprkb
d10 d19 d22 d3 d5	3	Ints8
		Taf7
		Tubgcp3
d13 d16 d19 d3 d5	3	Actg1
		Chmp4b
		Eif4e
d13 d16 d22 d3 d5	1	Utp11l
d13 d19 d22 d3 d5	1	Nuf2
d16 d19 d22 d3 d5	4	Sf3b6
		Gm21119
		Incenp
		Vprbp
d10 d13 d16 d19 d3	1	Pold3
d10 d13 d16 d19 d5	16	Gtf2b
		Cyc1
		Rnf20
		Wdr7
		Fosl1
		Gm15107
		Pwp1
		Eaf1
		Arglu1
		Ogdh
		Vps51
		Arl2
		Thg1l
		Recql4
		Iars2
		Tipin
d10 d13 d16 d22 d5	6	Nudc
		Cog4
		Pkm
		Naa15
		BC055324
		Mis18a
d10 d13 d19 d22 d5	10	Phax
		Ppp1r2
		Srebf1
		Nsfl1c
		Vps52
		2700062C07Rik
		Snrnp40
		Gnl3
		Pggt1b
		Pmf1
d10 d16 d19 d22 d5	7	Egfr
		Snapc3
		Ehmt1
		2310011J03Rik
		Cwc15
		Aurkb
		Rplp1
d13 d16 d19 d22 d5	8	Srp54b
		Pcyt2
		Dnajc8
		Ddx21
		Wdr75
		Ttc27
		Lin52
		Rpl28
d10 d13 d16 d19 d22	122	Sptlc2
		Odc1
		Mrpl57
		Dnajc11
		Rpia
		Hist1h2ak
		Pnpt1
		Fam58b
		Fh1
		Ankrd49
		Mrpl4
		Cox7b
		Mrpl14
		Lars2
		Tfb2m
		Mtpap
		Smc6
		Mrps17
		Qrsl1
		Lsm10
		Mrps27
		Slc7a5
		Mrpl52
		Mtmr9
		Elp3
		Vps33a
		Rars2
		Tma16
		Mrpl28
		Usb1
		Aifm1
		Clcc1
		Ctu1
		Polrmt
		Uhrf1
		1110008L16Rik
		Cand1
		Npc1
		Eftud1
		Naa35
		Peo1
		Hsd17b10
		Traip
		Gpi1
		Toe1
		Fntb
		Umps
		Ppp6c
		Pstk
		Sod1
		Rraga
		Slc25a26
		Ilf2
		Kti12
		Mrpl43
		Mrpl54
		Usp16
		Opa1
		Arnt
		Get4
		Pmvk
		Amd1
		Timm50
		Ube2n
		Sbds
		N6amt1
		Wdr4
		Mms19
		Trub2
		E2f3
		Uqcrfs1
		Mre11a
		Asun
		Rpl39
		Parg
		Fignl1
		Wdr77
		Vars2
		Adat2
		E130309D02Rik
		Ash2l
		Hist1h2ab
		Zfp534
		Mtg2
		Zfp574
		Mrpl55
		Sap18
		Cox20
		Hif1a
		Wars2
		Mrps18a
		Csnk1a1
		Mrpl23
		Dnm2
		Sdha
		Cycs
		Mogs
		Acly
		Ssbp1
		Ppih
		Znhit6
		Mrpl15
		Lonp1
		Ube2g2
		Hnrnpc
		Sars2
		Aars2
		Ikbkap
		Pelo
		Aasdhppt
		Esd
		Adss
		Uqcrc1
		Vrk1
		Ppil2
		Pars2
		Polg2
		Mars2
		Supv3l1
		Mrps15
		Tufm
		Dolpp1
d10 d13 d3 d5	44	Cds2
		Vmn1r119
		Psmd2
		Rabggta
		Tbl3
		Nus1
		Tsr2
		Gm14632
		Dgcr14
		Gm5891
		Rars
		Lsm6
		Ecd
		Bud13
		Kif23
		Clp1
		Vmn2r48
		Osbp
		Utp15
		Psmc2
		Lamtor1
		Cdca5
		Narfl
		Spcs2
		Urb2
		Gm13279
		Fxn
		Casp8ap2
		Lsm12
		Gm6902
		Trappc11
		Med22
		LOC100861615
		Znrd1
		Sart1
		Scgb1b19
		Vmn1r183
		Nol11
		Tbcc
		Arpc4
		Phb2
		Nob1
		Rpl35
		Nup155
d10 d16 d3 d5	3	Nup205
		Psmb5
		Sap130
d10 d19 d3 d5	1	Rrs1
d10 d22 d3 d5	7	Rbm25
		Anapc2
		Snw1
		Srsf2
		Orc1
		Med21
		Cep192
d13 d16 d3 d5	2	Gm2933
		Rpp38
d13 d19 d3 d5	1	Vmn1r151
d16 d19 d3 d5	2	Gltscr2
		Slc39a10
d19 d22 d3 d5	2	Kpnb1
		Gm5458
d10 d19 d22 d3	1	Gm5622
d13 d16 d19 d3	1	Fam32a
d16 d19 d22 d3	2	Gm3488
		Prkar1a
d10 d13 d16 d5	15	Pisd
		Hist1h3c
		Ints1
		Nhp2
		Emc1
		Cxxc1
		Fam50a
		Msto1
		Hist1h2ag
		Mis12
		Haus7
		Ercc2
		Asna1
		Ddx59
		Mis18bp1
d10 d13 d19 d5	6	Cinp
		Smn1
		Rpp30
		Cul1
		Srebf2
		Zw10
d10 d13 d22 d5	3	Cept1
		Emc8
		Caml
d10 d16 d19 d5	2	Polr1e
		Alg13
d10 d16 d22 d5	3	Ints5
		Gnb1l
		Exoc4
d10 d19 d22 d5	1	Ctcf
d13 d16 d19 d5	3	2810004N23Rik
		Arpc3
		Mms22l
d13 d16 d22 d5	2	Cops4
		Cep350
d13 d19 d22 d5	1	Usp7
d16 d19 d22 d5	2	Gm14151
		Rpl36a
d10 d13 d16 d19	18	Mrps22
		Ppp4c
		Mrps33
		Isca2
		Vps39
		Vac14
		Tomm20
		Mrpl17
		Ubr5
		Slc12a9
		Commd6
		Kntc1
		Nelfb
		Lamtor2
		2022-09-07
		Nars2
		Tfdp1
		Pnkp
d10 d13 d16 d22	7	Cox15
		Oxa1l
		Ilk
		Hist2h3c1
		Tefm
		Sdhc
		Rad50
d10 d13 d19 d22	4	Vwa9
		Nsmce1
		Mybl2
		Mrpl22
d10 d16 d19 d22	7	Ddx42
		Dclre1b
		Vps18
		Ept1
		Kdm8
		Pfas
		Ift74
d13 d16 d19 d22	29	Abcd4
		Ext1
		Sos1
		Tiprl
		Fig4
		Rnaseh1
		Dscc1
		Smc2
		Gdi2
		Cul2
		Pdgfrb
		Pcbp2
		Derl1
		Cars2
		Rab10
		Gml
		Gtf2f2
		Cox17
		Ddx11
		Prkra
		Vmn1r122
		Hist1h4c
		Olfr153
		Rnaseh2a
		Emc7
		Adck4
		Vmn1r139
		Actr6
		Slc16a1
d10 d3 d5	43	Gm10220
		Med4
		Eftud2
		Ppp1r14b
		Rtf1
		Srp54a
		Eif3g
		Nup214
		Cdc20
		Copb1
		Cdc5l
		Mcm6
		Tuba1a
		Ino80
		Vmn1r132
		Vars
		Fermt2
		Gins4
		Nol8
		Utp18
		Polr2d
		Nup88
		Triap1
		Ppp1r10
		Prpf4
		Rpl7
		Gins3
		Polr3e
		Actr10
		Rbmx2
		Atp6v0e
		Hmgb1
		Nup85
		Rtbdn
		Nfya
		Twistnb
		Gtf2a1
		Wdr43
		Eif2b5
		C130026I21Rik
		1810026J23Rik
		Bub1b
		Anapc1
d13 d3 d5	18	Hist1h2bh
		Pdcl
		Paf1
		Pomp
		Gpx4
		Nedd1
		Aurka
		Nfyb
		Ints4
		Gm14440
		A530032D15Rik
		Snrnp70
		Dnajc13
		2810408M09Rik
		Rrn3
		Abcf1
		Zfp830
		Ppie
d16 d3 d5	2	Eif2s3x
		Gm14346
d22 d3 d5	2	Atp6v1f
		Lage3
d10 d13 d3	4	Hist2h2ac
		Ticrr
		Fam96b
		Atl2
d13 d16 d3	1	Vmn1r126
d19 d22 d3	2	Rpl29
		Haus2
d10 d13 d5	34	Capzb
		Trmt5
		Hdac3
		Hist1h4d
		Med14
		Oraov1
		Prpf40a
		Trnt1
		Pgs1
		Gfer
		Gtf3c4
		Vps13d
		Uba3
		Grpel1
		Mrpl12
		Ehmt2
		Rab6a
		Orc4
		Ap1m1
		Dynlt1f
		Snf8
		Mnat1
		Ppp2r2a
		Rnasek
		Dpy30
		Tceb1
		Mob4
		Ptdss1
		Ric1
		Cdk7
		Dhx36
		Cenpk
		Fdx1l
		Psmg3
d10 d16 d5	9	Drosha
		Tubgcp5
		Gtf2h1
		Ttf2
		Hnrnpf
		Cmpk1
		Rbm14
		Hist1h2ah
		Cog2
d10 d19 d5	2	Nupl1
		Exoc1
d10 d22 d5	3	Pi4ka
		Psmd13
		Efr3a
d13 d16 d5	9	Acsl3
		Bnip1
		Las1l
		Mettl3
		Dolk
		Atxn10
		Kif18b
		Elac2
		Rsl1d1
d16 d19 d5	3	Cnot11
		Dynlt1a
		Usp5
d16 d22 d5	2	Rictor
		Srp68
d19 d22 d5	2	Rad17
		Snrnp48
d10 d13 d16	19	Naa25
		Polg
		Atxn2l
		Gtf2a2
		Mrps16
		Clasrp
		Pfdn1
		Mrps12
		Nsmce4a
		Aurkaip1
		Mrps28
		Emc2
		Elp2
		Mrps21
		Trmt6
		Cep120
		Ercc6l
		Mrpl20
		Brca1
d10 d13 d19	4	Mrpl16
		Rfk
		Cks1b
		Mrps25
d10 d13 d22	4	Cbx3
		Pa2g4
		Xpo5
		Dhx35
d10 d16 d19	3	Atrx
		Lamtor4
		Mrpl46
d10 d19 d22	2	Usp37
		Aagab
d13 d16 d19	7	Srbd1
		Tfb1m
		Dbpht2
		Igf1r
		Aar2
		Mrpl50
		Nae1
d13 d16 d22	7	Xrcc3
		Sdhaf2
		Ccnt1
		Dcps
		Sco1
		Mettl1
		Kif2c
d13 d19 d22	5	Dph5
		Osbpl9
		Dnttip2
		Wdr61
		Rragc
d16 d19 d22	22	Rab1
		Mrps30
		Taf5l
		Taf6l
		Heatr3
		Vmn1r200
		Wdr83
		B3galt6
		Cox5a
		Tmem41b
		Ctu2
		Gale
		Zwilch
		Gm7361
		Syncrip
		Epc2
		Fchsd2
		Scly
		Setd5
		Phf23
		Orc2
		Bmpr1a
d3 d5	73	Cdc27
		Rhox3f
		Donson
		Zscan4f
		Gbf1
		Uba2
		Lce3d
		Gm5795
		Zbtb17
		Tpr
		Ncl
		Gm21637
		Nf2
		Vmn2r42
		Cebpz
		Paxbp1
		Tsg101
		Mepce
		Slxl1
		Rpf1
		Snap23
		Sec61g
		Sf3b1
		Krtap5-3
		Dhx8
		Gnl2
		Zmat2
		Atp6v1h
		Rad21
		Thoc1
		Alyref
		Noc2l
		Copb2
		Cyfip1
		Ddx19a
		Wdr81
		Myl12a
		Ska3
		Wrnip1
		Gm10147
		Trp53rk
		Rnps1
		Bub1
		5031410I06Rik
		Mzt1
		Gm4214
		Plk1
		Setd8
		Sec16a
		Ddx46
		Sgol1
		Gm3139
		Copz1
		Gcn1l1
		Ercc3
		Gm15284
		Hist1h2bf
		Psmd8
		Cdca8
		Gm15097
		Gm4567
		Timm44
		Hcfc1
		Ice1
		Sap30bp
		Chaf1a
		Pelp1
		Ttf1
		Speer4c
		Gspt1
		Slu7
		Vmn2r36
		Aqr
d10 d3	7	Hist1h4m
		Vmn1r158
		Cactin
		Atp5e
		Gm21951
		Nkap
		Hist1h4f
d13 d3	1	Ifna6
d22 d3	1	Gm13276
d10 d5	42	AK010878
		Ppp1r11
		Tomm40
		Tango6
		Rpp25l
		Rad54l2
		Thoc2
		Tsen54
		Krtap4-13
		Med27
		Tmem199
		Pi4kb
		Eif3b
		Rnf40
		Tpi1
		Diexf
		Anapc5
		Brd4
		Znhit3
		Vmn1r79
		Hjurp
		Sart3
		Tpx2
		Prdm15
		Rcl1
		Mcmbp
		Cog7
		Sec61b
		Sgsm3
		Zfp407
		Sec62
		Sbno1
		Htatsf1
		Atf4
		2310036O22Rik
		Ncapd2
		Wtap
		Fam210a
		Ccdc174
		Gtf3c6
		Sfswap
		Mphosph6
d13 d5	5	Med26
		Fip1l1
		Ttc1
		Tsen2
		Zfp131
d16 d5	1	Cenph
d19 d5	5	Jtb
		Zcchc9
		Vmn2r38
		Gm15114
		H2-Q6
d22 d5	4	Lsm3
		Mgat1
		Shfm1
		Anln
d10 d13	31	Vps53
		Mrpl38
		Atic
		Vps11
		Mrpl44
		Mrpl13
		Brap
		Med18
		Zscan4c
		Dicer1
		Cd2bp2
		Mrps2
		Cwc27
		Ncdn
		Ugp2
		Eny2
		Keap1
		Trmu
		Mrpl2
		B4galt7
		Ints10
		AI597479
		Rbmxl1
		Timm17a
		Zfx
		Mrpl39
		Gpr89
		Taf11
		Elp4
		Pnpo
		Tti2
d10 d16	3	Mrps7
		Ireb2
		Unc45a
d10 d19	2	Yars2
		Mrpl49
d10 d22	5	Cd3eap
		Tsen34
		Srcap
		Mau2
		Slc2a1
d13 d16	17	Rad51d
		Taf4a
		D10Wsu102e
		Rad51c
		Ppa2
		Uqcrq
		Arpc2
		Dars2
		Senp6
		Vmn2r106
		Parn
		Tomm70a
		Armc5
		Gcfc2
		Flad1
		Elovl1
		Sco2
d13 d19	3	Faf2
		4732456N10Rik
		Nfib
d13 d22	5	Eral1
		Papss1
		Ttc14
		Nufip1
		Gnai2
d16 d19	19	Gab1
		Tbkbp1
		Lias
		Vmn2r31
		Ddx39b
		Tkt
		Snx3
		Vmn1r112
		Ubxn7
		Slco4c1
		Sytl3
		Ing3
		Cad
		Cops2
		Nsun4
		Rab35
		Abcd3
		Gm13139
		Ube2e2
d16 d22	3	BC027231
		Vmn2r35
		4930555G01Rik
d19 d22	16	Ctps
		Bptf
		Prrt2
		Gpr141
		Elof1
		Commd3
		Gm6408
		Gm428
		Npc2
		Extl3
		Tmem41a
		Dnttip1
		Kmt2d
		Kbtbd2
		Ccdc22
		Txndc17
d3	80	Snip1
		Psmd11
		Spon1
		Zfp942
		Atp5d
		Gm14308
		Olfr330
		Npat
		Zfp326
		Gm3701
		Ssxb1
		Gm4559
		Mcm10
		Siah3
		Vmn1r120
		Mastl
		Pan2
		Olfr594
		Sbpl
		Rbm42
		Rpa3
		Eif2s2
		9130011E15Rik
		Slc22a22
		Wdr38
		Nup54
		Gm10104
		Ing1
		Atp5c1
		Ppp2r5d
		Ccdc74a
		Zfp771
		Vmn2r41
		Gm4187
		Rbm10
		Sin3a
		Npr1
		Pacrgl
		Mfap2
		Evi5
		Crkl
		Spin2d
		Cebpe
		Suds3
		Wee1
		Gm11569
		Vmn1r94
		Ccnb1
		Clspn
		Hist1h4b
		Psmd1
		Ranbp2
		Cenpt
		4933402N22Rik
		Sumo2
		Rhox4c
		Ubap1
		Gm14511
		Gmcl1l
		Olfr318
		Gm1979
		Gm9758
		Hras
		Itgb1
		Nup98
		Pex11b
		Olfr1085
		Tubgcp6
		Armcx3
		Ubb
		Stx5a
		Gsdmc3
		Gm5878
		Ccdc86
		H2afj
		Krtap4-9
		Plin5
		Vmn2r46
		Klk1b5
		Gm2927
d5	101	Dmxl1
		Olfr1330
		Ddx52
		Rev3l
		Rbbp6
		Gm14347
		Agpat3
		Stx4a
		Mageb3
		Wasl
		Ostc
		Olfr749
		Nelfa
		1700001F09Rik
		Ncaph
		Gemin4
		Sde2
		Dctn2
		Nup153
		Khdc1b
		Tln1
		Nom1
		Fabp5
		Scgb2b17
		Rrp15
		Nup62
		Nudt10
		Vmn1r100
		Nme2
		Gm13242
		Pex3
		Zc3h13
		Gtf3a
		Mapk1
		Cops8
		Tgs1
		Snrnp27
		Rhox2d
		Timm13
		Spata5
		Zbtb41
		Gin1
		Aldh16a1
		Zfp781
		Il15ra
		Gpatch1
		Atrip
		Ncapg2
		Pabpc1
		Amfr
		Pop5
		Med28
		Rhox4d
		Safb
		Gar1
		Taf1d
		Mup16
		Pik3r4
		Rrp36
		Tamm41
		Elp5
		Gm4133
		U2surp
		Vmn1r117
		Med17
		Rpap2
		Numa1
		Preb
		Rfc3
		Nol7
		Bard1
		Gtf2e1
		Gemin2
		Lipo1
		Cdc26
		Ipo7
		Mapk6
		Haus1
		Pdcd2
		Nvl
		Kansl2
		Ssr2
		Extl2
		Brpf1
		Gm8653
		Wdr25
		Rpp40
		Olfr1381
		Vmn1r114
		Sae1
		Cherp
		Gtf2f1
		Ngdn
		Mup6
		Ost4
		Zc3h8
		Hist2h3c2
		Hist3h2ba
		Mcm3ap
		Mtbp
		Sec23ip
d10	57	Ube2l3
		D830030K20Rik
		Wfdc11
		Szrd1
		Gm11711
		Mrps26
		Srprb
		Defb9
		Atp6ap1
		Gm15093
		Chmp7
		Thoc7
		Smg1
		Chd4
		Mrpl19
		Pdcd10
		Trpm7
		Mrpl36
		Mon2
		Amotl2
		Pcf11
		Gemin7
		Gm11559
		Dctn1
		Hacd2
		Zfr
		Gadd45gip1
		Olfr111
		Sdhb
		Ep400
		Gatb
		Skiv2l
		Gfm1
		Syvn1
		Emc6
		Srrd
		Fars2
		Ttc4
		Mrpl47
		Hmga1-rs1
		Pitpnb
		Ccdc12
		Cog3
		Prpf18
		Wbscr16
		Vps36
		Inpp5k
		Prune
		Vbp1
		Gmeb2
		Nbas
		Mtmr4
		Vps45
		Cdx2
		Gm5662
		Mrps5
		Dr1
d13	41	Uri1
		Rpusd4
		Isca1
		Dus1l
		Mrpl33
		Mterf4
		Rabif
		Mrpl9
		Coa7
		Mipep
		Tmem208
		Rab3gap2
		Mrpl18
		Ldlr
		Rpap3
		Pet117
		Scaf4
		Lig3
		Akirin2
		Mical2
		Yeats2
		Gnptab
		Csrp2bp
		Nadk2
		Malsu1
		Tmem209
		Olfr27
		Zfp600
		Denr
		Dctn4
		Mrpl40
		Vma21
		Chp1
		Gmeb1
		Oxsm
		Ccdc137
		Ube2q1
		Sugp1
		Slbp
		Dctd
		Srsf10
d16	16	Zzz3
		Uqcrb
		Vmn1r62
		Mus81
		Mrps14
		Smarcc1
		Rpe65
		Vmn2r102
		Leng1
		Uxs1
		Oas1g
		Cenpq
[truncated: 54 more rows]

## Sheet: Hypoxia 2D-positive
Names	total	elements
d10 d13 d16 d19 d22 d3 d5	4	Pten
		Cs
		Rgs5
		Tfpi2
d13 d16 d19 d22 d3 d5	1	Olfr1309
d10 d13 d16 d19 d22 d3	2	Vgll4
		Galr1
d10 d13 d16 d19 d22 d5	21	Sox4
		Cyp51
		Fasn
		Insig1
		Itgb2
		Trpa1
		Klhdc3
		2810474O19Rik
		Itgb1
		Spon2
		Gsk3b
		Gna13
		Tspan8
		Stoml2
		Kitl
		Slc25a1
		Acaca
		Pawr
		Erp44
		Rcor1
		Aadacl2
d13 d16 d19 d22 d3	1	Nxph2
d10 d13 d16 d19 d5	1	Tmem70
d10 d13 d19 d22 d5	1	Gen1
d10 d13 d16 d19 d22	29	Hspa13
		Pip4k2b
		Fech
		Abhd3
		Cacnb3
		Chchd2
		Cdk13
		Cluh
		Zmiz1
		Zfyve27
		Glyatl3
		Cacna1s
		Ociad1
		Ppox
		Nwd2
		Tas2r114
		Foxc1
		Cdkn2a
		Ppfia4
		Zfp648
		Cox18
		Nuak1
		Ambra1
		Slc25a30
		2200002J24Rik
		Olfr351
		Sgpp1
d10 d13 d3 d5	1	Aph1b
		7420461P10Rik
d13 d16 d19 d3	1	Olfr1287
d13 d16 d22 d3	1	Olfr1219
d16 d19 d22 d3	1	Med12
d10 d13 d16 d5	2	Scn7a
		Zfp65
d10 d16 d22 d5	1	Ica1
d13 d16 d19 d5	1	Ccnj
d16 d19 d22 d5	1	Ilf3
d10 d13 d16 d19	10	Entpd2
		3425401B19Rik
		Prrc1
		Irf2bp1
		Ltb4r1
		Cblb
		Slc25a20
		9530003J23Rik
		Btk
		Fgd6
d10 d13 d16 d22	3	Popdc3
		Gtf2h5
		Spdya
d10 d13 d19 d22	6	Stk40
		Vmn1r208
		Adgrl4
		Ndufa6
		Tnfaip2
		BC051019
d10 d16 d19 d22	2	Cep89
		Rbbp8nl
d13 d16 d19 d22	19	Atp9a
		Ptgdr
		Med9
		Fam71e1
		1700016K19Rik
		Maml1
		Hsd3b5
		Olfr1444
		Surf1
		Pdzd8
		Mtus1
		Pdcl2
		Sh3bgr
		Chpf
		Olfr354
		Ido2
		Mrap
		Zbtb24
		Gm364
d10 d3 d5	2	Fgf14
		CAGE.control.g52770
d13 d3 d5	3	Slc7a3
		Cyp11a1
		Hlf
d19 d3 d5	1	Morc3
d10 d13 d3	2	CAGE.control.g59256
		Chrna4
d10 d16 d3	1	Pomc
d13 d16 d3	1	Egln1
d10 d13 d5	11	Hlcs
		Ndufaf4
		Stim2
		Fam131b
		Itga5
		Fbxl4
		Best3
		Vmn1r196
		Fam89a
		1700008P02Rik
		Guf1
d10 d22 d5	1	Efcab3
d13 d16 d5	2	Vmn2r93
		Vgll3
d16 d22 d5	1	Spin2c
d19 d22 d5	2	Abr
		Atp5j
d10 d13 d16	9	Dio2
		Pptc7
		Cox8a
		Cenpb
		Zdhhc19
		Chchd1
		Slc25a37
		F830016B08Rik
		Ywhaz
d10 d13 d22	1	Nap1l4
d10 d19 d22	3	Il1rl2
		Khnyn
		Rela
d13 d16 d19	7	Olfr825
		CAGE.control.g32474
		Aif1l
		Ces1c
		Gm1045
		Topors
		Aldh3b2
d13 d16 d22	4	Mpo
		Cst3
		Tagap
		Irf3
d13 d19 d22	8	Cdh2
		Spryd3
		Foxred1
		Hist1h1b
		Notch1
		Psd3
		Rgs21
		Med10
d16 d19 d22	39	Arpc5l
		Slc35a2
		Clec4e
		Ep300
		Mtx3
		Akr1c6
		Scamp1
		Olfr780
		Rsf1
		Snap47
		Gnb4
		Mepe
		Mtif3
		Fam160a1
		Ankrd22
		Crygb
		Paqr7
		Piwil2
		Il17f
		Zfp317
		Set
		Tra2a
		Sdr39u1
		2010109I03Rik
		Prss48
		2310039H08Rik
		Olfr770
		Car12
		Sp7
		Chm
		Arap1
		Zfp523
		Zmym6
		Tbc1d2
		Catsperb
		Dph7
		4930550L24Rik
		Aadac
		Phrf1
d3 d5	32	Sorl1
		Il3ra
		Vgll1
		Arap3
		Olfr616
		CAGE.control.g41756
		Atp7a
		Htra1
		Syne1
		Ctsq
		9130008F23Rik
		Cep95
		Cyp3a59
		Ms4a6b
		Ccdc78
		Mettl7b
		Gmnc
		CAGE.control.g2007
		Dlgap5
		Pcgf3
		Ccdc60
		Myh9
		Pnpla1
		Gabrp
		Cstad
		Lpl
		Cd27
		Stard4
		Gap43
		Btrc
		Slc12a2
		Echdc2
d10 d3	3	Cpox
		Psg23
		Scgb1b30
d13 d3	3	Prr36
		Myl6b
		Synj2bp
d19 d3	1	Zfp119a
d22 d3	1	Xk
d10 d5	22	Ndufs2
		Eps15
		Zc3h7a
		Tyr
		Ttc21a
		Gnai1
		Cacng3
		Mrpl30
		Foxa3
		Gxylt2
		Olfr1490
		Gna12
		Ncam2
		Brd2
		Itga2
		Commd9
		Mnd1
		Mcts1
		Has2
		Olfr745
		Ryk
		Lpcat2b
d13 d5	4	Cox7b2
		Tm2d2
		Gm156
		Ibsp
d16 d5	4	Ak7
		Olfr1489
		Apol11b
		Slc24a4
d19 d5	1	Ubl3
d22 d5	5	3830403N18Rik
		Spta1
		Dynlt3
		Rtkn2
		Camkv
d10 d13	34	Clpb
		Atpaf2
		Gm4980
		Siglece
		Pla2g4c
		Acer2
		2610301B20Rik
		9030617O03Rik
		Dpcd
		Fam96a
		Kcnab2
		Slc44a2
		Ttpa
		Hdc
		B4galt5
		Ms4a2
		Idi2
		Cdkn1b
		Hipk2
		E030018B13Rik
		Hdgfrp3
		Hspbp1
		Hormad2
		Rimbp3
		CAGE.control.g3034
		Tshz1
		Arid5b
		Zc3hav1
		Lpin2
		CAGE.control.g70687
		Ly6d
		Itgb3
		Uhrf1bp1l
		Trip4
d10 d16	7	Qprt
		Olfr1368
		Pdhx
		Smgc
		Lefty1
		Mki67
		Nkiras1
d10 d22	3	Tmem26
		Lrrc19
		2310061I04Rik
d13 d16	12	Spata33
		Nr2c2
		Cnot8
		Tob1
		Prm3
		Trib1
		Nox1
		Rap2b
		Cd80
		Adss
		Lpar4
		Pcdh1
d13 d19	4	Cnot4
		Sbk1
		Car14
		Rab33b
d13 d22	1	Rhebl1
d16 d19	14	Olfr169
		Cacfd1
		Capns1
		Rock2
		Shc4
		Fam159b
		Strn3
		Phex
		Pgm2l1
		Nptx1
		Tm4sf1
		9230110F15Rik
		Hmg20b
		Degs1
d16 d22	2	Tbc1d1
		Ndufa5
d19 d22	34	Lipi
		1700011H14Rik
		Nr2f2
		Rab9b
		Atmin
		Scn1a
		Fam184b
		Vmn2r39
		Pcdhb16
		Ceacam18
		Olfr180
		Fam118b
		Txndc2
		Pvrl4
		Acad8
		Agpat1
		Syt10
		Usp26
		Tmod4
		Ndufb9
		Grhl1
		Mtrf1l
		Ceacam9
		Dmd
		Trnp1
		Unc5a
		Ankrd45
		Aqp6
		Magea6
		Zcchc5
		CAGE.control.g35388
		BC100451
		Tfap2e
		Zdhhc3
d3	191	Vmn1r5
		Apobr
		H2-Ab1
		Hrsp12
		Tyrobp
		Gnmt
		Ralgapb
		CAGE.control.g65220
		B930041F14Rik
		Adam23
		Olfr262
		Rhou
		Det1
		Maats1
		Wls
		Zfp345
		Hddc2
		Cables2
		Ptgs2
		Emc2
		Acot11
		Daam1
		Gm21379
		Ccdc68
		CAGE.control.g30124
		Snap29
		Gpatch11
		Pirt
		Adam10
		Exog
		Atxn7l1
		Pstpip2
		Socs5
		Lrriq3
		Nell1
		Ccr3
		Mgmt
		9930012K11Rik
		Cstf2
		CAGE.control.g33119
		Dopey1
		1700018F24Rik
		Dpyd
		Tas2r136
		Slc5a5
		Ovol2
		Smim5
		Rgs18
		Lmod2
		Hspb7
		Scgb1b3
		Ugt2b36
		CAGE.control.g6242
		Hs3st5
		Fam102b
		Pak3
		Tdrkh
		Psme4
		Ano10
		Ltc4s
		Dppa5a
		Pcdhac1
		Atg7
		Rprm
		Olfr1348
		Olfr25
		Acot1
		Ddit4
		Podn
		Bcl2l10
		Scg3
		B020031M17Rik
		CAGE.control.g67150
		Dcstamp
		Etnk1
		Zfp516
		Pafah2
		Slc38a4
		Abtb2
		Wnt2
		Prl2c2
		Palm3
		1700003F12Rik
		Tmprss2
		Znrf4
		Lrrc40
		Sema4a
		Olfr138
		Pafah1b2
		Rai2
		CAGE.control.g42808
		Vmn2r21
		CAGE.control.g63857
		Usp33
		Trpv5
		Rock1
		Dhrs1
		Phf21a
		1700122O11Rik
		E330034G19Rik
		Olfr1012
		Gm13119
		Gm20594
		Kcnb1
		Traip
		Prom2
		CAGE.control.g79300
		Xpo7
		Dtx3l
		Cul7
		Urah
		CAGE.control.g75108
		CAGE.control.g5628
		Ccr1l1
		Col5a2
		Cacng8
		Olfr1299
		Tcf20
		Amer3
		Gm5082
		Fam122b
		Srgap2
		Itga3
		Gapdhs
		Fkbpl
		Cep112
		Cyb561d2
		Slc35c2
		AU022252
		Olfr701
		Gria2
		Olfr168
		Mrgprb1
		Serping1
		Gm1110
		Ncf1
		Palld
		Ugdh
		Klrc3
		CAGE.control.g3595
		CAGE.control.g33754
		Prex1
		4930550C14Rik
		Irak2
		Ube2e2
		Tdrd12
		Ankrd1
		Nhsl1
		Dusp8
		Arf6
		Serpine2
		Sri
		Olfr239
		1700013D24Rik
		Sgk2
		Mdm2
		Cox6b1
		Clstn3
		Serinc1
		9530053A07Rik
		Gm826
		Vmn1r234
		Serinc5
		Smpd4
		1700067P10Rik
		Trim14
		Dnah1
		CAGE.control.g62313
		Esrrg
		Dbn1
		Olfr344
		Ier5
		Ttll9
		D430041D05Rik
		Tas2r118
		Arsi
		1700029F12Rik
		Olfr187
		Rims2
		Gsap
		Rbp2
		Ptpn3
		Olfr829
		Arl9
		Pdzph1
		Tox3
		Ripk4
		Ccl28
		Olfr514
		Rnd1
		Cideb
d5	166	Aldh5a1
		Mtmr10
		Edaradd
		Hspa12a
		Myrfl
		Tor2a
		Plscr3
		Tab1
		Vash2
		Mgst2
		Ulk1
		Urod
		Pafah1b3
		Tcfl5
		Idh3g
		Slc22a8
		Gm904
		Olfr279
		Hdgfl1
		CAGE.control.g30205
		Olfr898
		Tspan17
		Ptcd1
		Ntn1
		Foxe1
		Olfr332
		Lta4h
		Fasl
		Zdhhc5
		Sigirr
		Setbp1
		Gpr19
		Rhox13
		Gm436
		Tnfrsf11b
		Olfr876
		Tal1
		Kif26a
		Limch1
		2810403A07Rik
		C2cd2
		Ankra2
		Myom1
		Gm12886
		Vmn2r18
		Apol6
		Orai1
		Kctd16
		Parp3
		1700080E11Rik
		Prkg2
		Coa6
		Uty
		Mylip
		CAGE.control.g63913
		Gapt
		Prkab2
		Tdrd5
		Myt1l
		Ubl7
		Gucy2f
		Pex7
		Naa60
		Apobec1
		Akr1b10
		Tnfsf11
		Tsc2
		CAGE.control.g32350
		Hoxc4
		CAGE.control.g34371
		Gm4922
		Higd1c
		Neurl1b
		C330007P06Rik
		Olfr110
		Gorasp2
		Me3
		Tnfaip8
		Mavs
		4930502E18Rik
		Gm14374
		Mrpl33
		Prdm16
		Cxcl9
		Zadh2
		CAGE.control.g33709
		Acer3
		Cd244
		CAGE.control.g53052
		Slc2a5
		Rab6b
		Akr1d1
		Entpd4
		Morc1
		Mpnd
		1700016D06Rik
		Gramd1c
		Gm20823
		Ftmt
		Lrrc58
		Scoc
		Bbip1
		Olfr1449
		Cfap44
		Gpr139
		Gm21693
		Acd
		Vcam1
		Trim9
		Mrps34
		Olfr3
		Saa1
		Zfp957
		Tekt2
		Agpat6
		Defb34
		Cptp
		Nudt4
		CAGE.control.g29656
		Prmt8
		Sox3
		CAGE.control.g67175
		Btbd17
		Ube2d2b
		Nsun3
		Rnf111
		Atg101
		Fbxo3
		Nim1k
		Elfn2
		Zmynd8
		Ripk3
		Sorcs3
		St8sia2
		Magi2
		CAGE.control.g18742
		CAGE.control.g75084
		Fam170b
		Rasl10a
		Fam134c
		Olfr1124
		Slc6a19
		Galnt14
		Mdfic
		4933402E13Rik
		Ccl11
		Sh2d7
		Fam151b
		Rd3l
		Pidd1
		Olfr819
		Atp5b
		Olfr715
		Rad51b
		Ndufs6
		Sypl
		Abhd5
		Nhlh1
		Fam181a
		Elac1
		Jam3
		Szt2
		2022-09-08
		Pcdhac2
		Fopnl
		Cyp39a1
d10	121	Olfr229
		Lmnb2
		Ybx3
		D930020B18Rik
		Usp2
		Vmn1r231
		Tfcp2l1
		Acadvl
		Dirc2
		Fkbp9
		Pydc4
		Trps1
		Pfkl
		Pltp
		Slit2
		Rnpep
		Doc2a
		Rab11fip3
		Spata4
		Trp53bp2
		Hmbs
		Ckb
		Igfbp6
		Tns3
		Gpr50
		Gm595
		Mvb12b
		Trp53inp1
		B230219D22Rik
		Olfr1360
		Rpusd3
		Otud3
		Fxyd3
		Erap1
		Ptchd3
		4933430I17Rik
		Naa11
		Anxa4
		Tuba3b
		Senp1
		CAGE.control.g71934
		Apoc4
		Vmn1r49
		Phactr1
		Trim75
		Ddx4
		Nkiras2
		Fibin
		Krt35
		Gng7
		Rims3
		Plec
		Kcnv1
		Alox12b
		Slc38a9
		Gns
		Uprt
		Tnfsfm13
		Traf3ip3
		Ddhd2
		Fndc3a
		Ecm2
		Men1
		Pcbp3
		2310030G06Rik
		Gtpbp8
		Rnf144b
		Ptpra
		Olfr895
		Zfp385c
		CAGE.control.g62901
		Mfap3
		Akap9
		Arhgef10
		Wipf3
		Rnf121
		Kctd12b
		Olfr1308
		Stpg1
		Ebf4
		Tjp1
		Olfr477
		CAGE.control.g62007
		Loxl4
		Olfr272
		Map4
		Galnt11
		Cyp2d22
		Rtn1
		Gdap1l1
		Plp2
		Smim15
		Olfr313
		Zdhhc17
		Ablim3
		Slco6c1
		Nkd2
		Dusp11
		CAGE.control.g63597
		Fam193a
		Sema4b
		Cxcl12
		Olfr102
		Nfkbib
		Olfr720
		Tmod3
		CAGE.control.g14013
		Asb12
		Igsf3
		Sccpdh
		Gm20867
		Cmtm1
		Vstm2b
		Dpp4
		Muc13
		Gm6588
		Cfhr1
		Fscn3
		Ajap1
		Traf6
		Bbs9
d13	87	Atg13
		Iqcd
		Fignl2
		Camk4
		Olfr1362
		Gabra1
		Il10rb
		Btg1-ps1
		Nynrin
		Baz1a
		Lrba
		Adora3
		Pcdhb18
		Dot1l
		Tnip3
		Spata13
		Ero1lb
		CAGE.control.g54496
		Atp8b4
		Tle4
		Fhl5
		Gpatch3
		Rbfox2
		Rb1
		Abhd16b
		Nipal3
		Rcn1
		Mfsd3
		Themis2
		Apoa5
		Akr7a5
		Apol10a
		Dmpk
		Ube3c
		Akr1c21
		2510039O18Rik
		Rnase2a
		Gm9733
		Pnpla7
		Myl3
		Arl11
		Prr7
		Olfr914
		Pip4k2a
		CAGE.control.g14530
		Dnaaf1
		Npr2
		Klhl32
		Pkd2l2
		Lrrfip2
		Man2a2
		Cnih4
		Jdp2
		Tlr1
		Adcy5
		Atp5k
		Hoxc6
		Tas2r131
		Cxcl14
		Mfsd6
		Pnma2
		Usp22
		Med24
		Smim9
		Fndc8
		Slc22a22
		Ube2l6
		Zfp773
		Sema5a
		Olfr1366
		Atg10
		Uchl5
		Marveld1
		Fabp12
		Tas2r129
		Usp31
		Olfr1023
		Zc2hc1a
		Vps13a
		Vmn2r23
		Stard10
		Pnma5
		Ywhab
		Pnpla6
		Zcchc14
		Maea
		1110012L19Rik
d16	53	CAGE.control.g58039
		Abhd17b
		Ldlrad1
		Tcaf1
		Gm17359
		Olfr850
		Gpr25
		CAGE.control.g29816
		Rfwd2
		Peli1
		Gpd1
		Pou6f1
		Triml2
		Dennd1a
		Spin1
		Frem3
		Ccdc112
		Chil6
		Gm10267
		Cst8
		4932411N23Rik
		Oas1d
		Olfr1098
		Mrgprd
		Dnajc5b
		Fam78a
		Slc16a4
		Plcb4
		Tdrd9
		Ica1l
		Spatc1l
		Sclt1
		Dapk3
		Nfrkb
		Gorab
		Pcm1
		Ctnna3
		Hand1
		CAGE.control.g67830
		Cabs1
		Slc4a1
		Mreg
		Hhatl
		Lrrc69
		Ggact
		Ly6h
		Snap25
		Serinc3
		Adgrv1
		Pds5a
		Mkln1
		Mdh1b
		Zfp706
d19	17	Onecut1
		Hs3st2
		Lrrc16a
		Spry2
		P2ry12
		Amer1
		Smim22
		Tmem167
		Gli2
		Zfp3
		Slc7a6
		AI429214
		Ano9
		Mylk2
		Ddi1
		Ttc25
		Itgae
d22	43	Mdh2
		Hk2
		Kctd21
		Sec24b
		Ap4s1
		Mfn1
		Rasgrp3
		Msrb2
		Cox14
		Ilvbl
		Olfr117
		Asb9
		Cnn1
		Zfp474
		CAGE.control.g29927
		AA415398
		Havcr2
		Kidins220
		Cnnm4
		Ehbp1
		Prdm2
		Papln
		Wnt7b
		Cmc1
		Mkl1
		Amz1
		Reg1
		Hdac7
		Adam9
		Pcdh19
		Pold4
		Daf2
		Tceal1
		Kcnj13
		H60b
		Higd2a
		Nfil3
		Palb2
		Macrod1
		Sult1d1
		Agk
		Dcp2

## Sheet: 3D-negative
Cpsf3l
Pyroxd1
Osgep
Skp1a
Wdr36
Dhps
Nup160
Cenpn
Prmt5
Prim2
Rangap1
Rps28
Nedd8
Psmg3
Cdk9
Ddx23
Ddx5
Puf60
Hars
Eaf1
Dync1i2
Rpap1
Gm10406
Lsm6
Acsl4
Ints9
Lars
Lsm2
Rabggta
Tardbp
Gmppb
Ercc2
Mars
Lin52
Rsl24d1
Gins2
Hsd17b10
Gm4836
Ctdp1
Mcm7
Rps10
Pfdn5
Cct3
Dhdds
Nrf1
Exoc8
Cstf1
Naca
Uba1
Fnta
Adat3
Utp18
Telo2
Farsa
Mcmbp
Gtf3c1
Cct2
Rpl23
Csnk2b
Sf3a1
Gpn1
Polr3a
Snrpg
Hnrnpk
Kansl3
Dhx33
Ap2b1
Ppp1r8
Terf1
Birc5
Mcm3
Rbx1
BC052040
Cct7
Usp39
Mettl16
Nhp2
Fam96b
Zpr1
Rps15a
Skp2
Psmb3
Eefsec
Sepsecs
Slc25a26
Pcna
Rad9a
Clns1a
Espl1
Trappc3
Pop7
Ext1
Rgp1
Vps25
Ran
4930467E23Rik
Polr1b
Mat2a
Eif6
Polr1c
Rpl8
Rrp12
Ykt6
Kdsr
Rpa2
Gcn1l1
Chd4
Ruvbl2
Ddx10
Exosc2
Hist1h2ae
Snapc1
Nop2
Ska2
Hscb
Cenpa
Dmap1
Lsg1
Mrpl14
Anapc11
Rtel1
Kat8
Spc24
Lamtor2
Ptpn23
Sf1
Rps9
Snrpe
Pole
Rtcb
Psmc3
Rps14
Cops4
Zbtb8os
Brf1
Alg1
Rfc4
Rpa1
Snrpa1
Tubb5
Msto1
Srsf3
Trmt6
Ddx49
Cdan1
Psmb4
Hist1h2an
Magoh
Lamtor3
Uba3
Wdr12
Rad50
BC061237
E2f3
Ssu72
Med20
Inpp5k
Pno1
Pole2
Rabggtb
Pold2
Phf5a
Supt5
Ppp1r12a
Chordc1
Ppp2ca
Ccnh
Kars
Rpl23a
Clp1
Napa
Anapc10
Kat5
Wdr70
Tubg1
Snrnp35
Top2a
Cdt1
Mdn1
Trappc5
Exosc8
Vmp1
Nle1
Cpsf3
Rnpc3
Alyref
Anapc1
Cdc16
Eif3f
Rft1
Srpr
Mocs3
Farsb
Rps6
Ptar1
Banf1
Rpl21
Nipbl
Mrpl52
Golt1b
Eif2b5
Eif2b2
Polr2a
Adat2
Lrr1
Cenpm
Wdr74
Tut1
Sf3b5
Rpl38
Spcs3
Rpl37
Fam50a
Xab2
Snupn
Orc5
Nol12
Psma5
Sdad1
Ints7
Thoc2
Qars
Cdk11b
Prelid1
Med8
Tcp1
Hist1h4m
Ndor1
Bap1
Pgd
Hypk
1110004E09Rik
Metap2
Nup93
Supv3l1
Kctd10
Znhit2
Smarca4
Gm6902
Dpagt1
Mms22l
Gpx4
Phb2
Mrps27
Rtfdc1
Btf3
Ddb1
Ddx47
Cul2
Polr2j
Arl2
Rps21
Txnl4b
Psmd4
Srp19
Bub3
Vars2
Phax
Pop4
Atp6v1g1
Cenpk
Polr1e
Emc8
Grwd1
Pfdn6
Eif5
Chmp6
Nup107
Naa20
Oip5
Mios
Polr2e
Ints1
Ddx20
Mrpl55
Imp4
Rpl13
Rpp14
Deb1
Srsf1
Txnl4a
Nip7
Dhx37
Ddx27
Orc6
Hist1h2ai
Sf3b4
Prc1
Rpl36
Rpsa
Mcm4
Ncbp1
Cinp
Tmem199
Ttc4
Rps27rt
Nubp1
Hist1h4n
Pfn1
1810026J23Rik
Rpl5
Rpl34
Psmb5
Tpt1
Gins4
Letm1
Gm14345
Gtf2h3
Rps25
Lsm5
Trmt61a
Srp72
E130309D02Rik
Cenph
Dnmt1
Dtymk
Trappc4
Copa
Lars2
Ccdc115
Hist1h3c
Zfp335
Yeats2
Ctu2
Lsm4
Cct4
Gm16513
Elac2
Pmpca
Snrnp25
Ilk
Prim1
Btbd9
Hinfp
Eef1e1
Actr3
Dohh
Mbtps1
Rps23
Taf1c
Vmn2r40
Triap1
Csnk1a1
Gpn2
Uqcrc1
Actb
Polr3f
Atl2
Top1
Ecd
Eif2b3
Acly
Abcb7
Smc1a
Gemin5
Utp6
Cdk7
Spns1
Rpl7a
Chaf1b
Psma4
Atp6v1c1
Mrpl19
Scap
Uxt
Atp6v0c
Eef2
Imp3
Nars
Hmgcs1
Sdha
Psmb7
Cdc37
Uqcrc2
Cad
Hus1
Nudc
Iscu
Romo1
Rps3
Psma1
Pus3
Ciao1
Polr2f
Hist1h2ap
Sf3a2
Ska3
Dkc1
Psmb6
Xpo1
Slc7a11
Gm5634
Rpl32
Trappc8
Snrpf
Kti12
Polr2c
Oraov1
Cdk1
Tada2a
Nop58
Aldoa
Pdcd7
Hnrnpl
Klhl5
Rplp1
Sec13
Sdhb
Chek1
Rps5
Nop10
Tbca
Paics
Ncdn
Clcc1
Rars2
Mybl2
Haus5
Gm17019
Polr2b
Gtf3a
Sf3b6
Rrs1
Mcm2
Cirh1a
Rpl4
Hspa8
Sf3b3
Hist1h3h
Parg
Rps29
Utp20
Taf1d
Psmb2
Rbm39
Gemin2
Exosc3
Vrk1
Wbp11
Grpel1
Rbm14
Orc1
Emg1
Mcrs1
Mrpl18
Dis3
Med30
Hist1h2ak
Gm15107
Gtf2h4
Prpf38b
Atp6v0d1
Vwa9
Ints8
Rfc5
Nudt21
2022-09-07
Dut
Pold1
Sars
Nploc4
Ccnb1
Rpl37a
Med11
9030624G23Rik
Polr2g
Taf2
Ckap5
Rplp2
Rpp30
Dctn6
Mfap1b
Rpl12
Phf23
Tln1
Dync1h1
Tufm
Rpl30
Nop14
Riok1
Sec61a1
Tuba1c
Sfpq
Txnrd1
Rpn1
Rpl14
Cmtr1
Exosc4
Ino80b
Psmc4
Yeats4
Taf8
Supt16
Cse1l
Pik3ca
Rbm19
Rpl9
Bysl
Sacm1l
Ttc14
Haus3
Vps18
Tubgcp2
Ppp2r1a
Polr3e
Atr
Cpsf4
Hnrnpu
Hspa5
Rnasek
Rpl19
Gm3701
Mtpap
Cog4
Cd2bp2
Nhp2l1
Rrp7a
Esf1
Ppwd1
Aldh18a1
Prpf6
Exosc9
Cebpz
Rpl10
Ddost
Wdr18
Pafah1b1
Dph3
Rpl18a
Cpsf1
Fxn
Aars
Gbf1
Polr3b
Hnrnpc
Etf1
Hist1h2ao
Nup155
Tars
Atp6v1a
Slc35b2
Chmp4b
Exosc5
Mad2l1
Krtap5-2
Abt1
Timeless
Plrg1
Rps18
Med7
Erh
Dcaf13
Pam16
Pcid2
Cops3
Slc39a7
Gm10662
Cand1
Med31
Wars2
Ddx56
Krr1
Nol10
Usp7
Olfr482
Pisd
Ints4
Ercc3
Psmb1
Vmn1r183
Ptprh
Tonsl
Ttc27
Ascc3
Gm10413
Rbm22
Rpl26
Tomm22
Psma3
Lamtor4
Actl6a
Rars
Cds2
Gtf2e2
Cenpw
Cenpo
Tnpo1
Lsm11
Taf12
Polr1d
Taf5
Ggps1
Dnajc13
Rpl3
Nutf2
Vps33a
Mipep
Usp36
Vmn1r128
Arpc2
Rad1
Snrnp48
Asun
Arih1
Fdx1l
Ppp6c
Mfap1a
Gpkow
Polr1a
Nedd1
Vmn1r122
Igbp1
Eif3i
Trub2
Gm6460
Pi4kb
Rps2
Nme2
Trmt112
Gm14440
Pmpcb
Vars
Wrb
Mis18a
Urb1
Cdc40
Casp8ap2
Vps53
Asna1
Ocrl
Ccdc130
Spata5
Atp6v1e1
Tnpo3
Timm23
Hist1h2ac
Mrpl43
Sart3
Nelfb
Zzz3
Actr2
Sap18
Arid2
Preb
Derl2
Rragc
Gm10104
Cops6
Rsl1d1
Tango6
Tsen15
Tbp
Smu1
Gm5795
Taf6
Mms19
Prpf19
Ogt
Nat10
Sf3b2
Dars
Sys1
Prpf8
Mak16
Timm10
Wbscr22
Eif3c
Ppie
Mcat
Sde2
Plk1
Gemin6
Pes1
Bop1
Tkt
Prkra
Cdc5l
Hspd1
Hsd17b12
Brf2
Dctn5
Tsg101
Polg2
Dad1
Psmd6
Fam20b
Bccip
Sod1
Arpc4
Rpl6
Thap11
Thoc3
Orc3
Psmd13
Rpl7l1
Hyou1
Alg2
Wdr3
Mrps7
Tubgcp3
Mrps18a
Gtf3c5
Eif4a1
Wdr73
Atp6v1f
Ostc
Fh1
Fau
Pwp2
Rcl1
Slmo2
Uba52
Wdr1
Atp6v1d
Vps52
Zscan4f
Sf3a3
U2af2
Rpl7
Osbp
Rps27
Ints3
Arcn1
Nus1
Ccdc7
Tra2b
Las1l
Gmps
Rrm1
B4galt7
Hdac3
Phb
Nfs1
Guk1
Eif5a
Nubp2
Exosc7
Eif2b4
Nol6
Olfr125
Kif18b
Prpf38a
Gm13871
C130026I21Rik
Vcp
Ect2
Nadk2
Ik
Slc35b1
Rpp38
Pgam1
Gm10922
Cct5
Ddx54
Pkm
Arfrp1
Ric8
Ncapg2
Snrpb
Rae1
Eif1ad
Ppil2
Srsf7
Arf1
Hist1h2bp
Rpl39
Eif2s1
Fermt2
Tsen54
Nsl1
Mrps22
Tmem208
Eif3d
Hist1h2bk
Rrp15
Tdpoz2
Dlst
Psma6
Nuf2
Polr3k
Dnajc2
Haus7
Mau2
Gm14632
Lyrm4
Ssxb3
Dimt1
Timm50
Sars2
Actr6
Mcm5
Rrp9
Smarcb1
Ankle2
Ddx55
Ube2i
Tbc1d2b
Inpp5a
Arnt
Polr3h
Mrps16
Rpf2
Nhlrc2
Crnkl1
Tuba1a
Vmn2r46
Usp8
Tmem203
Rbmx2
Gm5148
Rpl3l
Sos1
Adsl
Dynlt1f
Rrn3
Nelfcd
Cct8
Rpl11
Ilf2
Ncbp2
Rps3a1
Pold3
Cltc
Gpr89
Zfp407
Vps16
Ncaph2
Bms1
Topbp1
Trmu
C87414
Pstk
Polrmt
Hyls1
Gm3488
Incenp
Gm1993
E2f4
Med21
Heatr3
Usb1
Rpp25l
Mad1l1
Spcs2
Fam132b
Ndc80
Vmn1r158
Prkrip1
Fcf1
Taf11
Cwc22
Stil
Cmpk1
Gfpt1
Gps2
Crcp
Rpl35a
Usp16
Ash2l
Tti2
Ddx41
Vmn1r143
Heatr1
Pgm3
Ppp1cb
Eif3m
Anapc2
Med25
Ncapg
Noc3l
Setd2
Dolk
Srrd
Rab10
Pwp1
Rfc3
Dph1
Gm8693
Hmgb1
Kdm4a
Hgs
Wdr24
Nup133
Ric8b
Hist1h3b
Prrg4
Dynlrb1
Nampt
Sap30bp
Pabpn1
Rplp0
Prpf18
Ogdh
Taf1b
Faf2
Anln
Yars2
Hspe1
Rbbp6
Vmn1r149
Polr2l
Rac1
Mapk1
Uqcrb
Wars
Mgat1
Rhox2d
Gk2
Tspan14
Polr3c
Wdr5
Aamp
Cd300a
Lsm12
Mlst8
Fen1
Gm10767
Ttk
Nsf
Trp53rk
Psmg4
Catsperd
Srp9
Trim43b
Cpsf2
Snrpd1
Fntb
Cars
Pdcl3
Unc45a
Paxbp1
Eif4a3
Cog3
Ctu1
Ccdc137
Bub1b
Gltscr2
Slc25a42
D2Wsu81e
Ptp4a1
Rcc1
Prpf4
Ppp1r2
Rps13
Sppl3
Speer4d
Ankrd53
Gart
Nudt18
2410131K14Rik
Exoc5
Haus8
Ppp2r3c
Dbr1
Hist1h2bb
Pi4ka
Gfer
Rab7
Rpl35
Hspa9
Fbxw11
Kri1
Oas1g
Pdrg1
Gnl3
Sprr2k
Mrps25
Mzt1
Pdcd2
Racgap1
Pfdn1
Cep350
Drosha
Gm15319
Recql4
Mup16
Zmat5
Nup85
Gm6696
Rpl24
Ddx39b
Cdca8
Fdxr
Gnb1
Med26
Gm10147
Snrnp70
Glrx5
Ccdc94
Skiv2l2
Rtf1
Wdr43
Dna2
Gfm1

## Sheet: 3D-positve
Cdkn2a		CDKN2A
Pten		PTEN
Myh9		MYH9
Eif4g2		EIF4G2
Fkbp1a		FKBP1A
Sufu		SUFU
Nf2		NF2
Det1		DET1
Aph1a		APH1A
Cblb		CBLB
Lztr1		LZTR1
Kirrel		KIRREL
Csde1		CSDE1
Tgfbr2		TGFBR2
Prmt10		PRMT10
Gid8		GID8
Lats1		LATS1
Nf1		NF1
Gnrh1		GNRH1
Sav1		SAV1
Kmt2d		KMT2D
Olfr1124		OLFR1124
Mettl3		METTL3
Tlr12		TLR12
Rb1		RB1
Gnb2l1		GNB2L1
Smad4		SMAD4
Rock2		ROCK2
P4ha2		P4HA2
Hmx3		HMX3
Enpep		ENPEP
Tgfbr3		TGFBR3
Pitpna		PITPNA
Tgfbr1		TGFBR1
Pdhx		PDHX
Mettl14		METTL14
Ckb		CKB
Lhx1		LHX1
Morc2b		MORC2B
Olfr1505		OLFR1505
Ccdc18		CCDC18
Dnajc3		DNAJC3
Tomm34		TOMM34
Rbpms		RBPMS
Snca		SNCA
Sirpb1b		SIRPB1B
Thumpd2		THUMPD2
Stk40		STK40
Tex261		TEX261
Hrasls5		HRASLS5
Runx3		RUNX3
Plxna2		PLXNA2
Ppm1e		PPM1E
Eif3h		EIF3H
Jrk		JRK
Cdc42ep1		CDC42EP1
Amer3		AMER3
Arid2		ARID2
Nprl3		NPRL3
Pqlc2		PQLC2
Agtrap		AGTRAP
Mib1		MIB1
Pmm2		PMM2
Itgb1		ITGB1
Tmpo		TMPO
Cyld		CYLD
Sycn		SYCN
Calcrl		CALCRL
Dynll1		DYNLL1
Slc30a1		SLC30A1
Cbfb		CBFB
Sgpp1		SGPP1
Basp1		BASP1
Ptpn12		PTPN12
Rock1		ROCK1
H2-T24		H2-T24
Olfr325		OLFR325
Slc6a4		SLC6A4
Vgll4		VGLL4
Dapk3		DAPK3
Rfwd2		RFWD2
Slc24a4		SLC24A4
Slc7a3		SLC7A3
Neb		NEB
Fzd1		FZD1
Ccl11		CCL11
Prss51		PRSS51
Rnf149		RNF149
Prr15l		PRR15L
Eps15l1		EPS15L1
Tctex1d4		TCTEX1D4
Klhl20		KLHL20
Strap		STRAP
4930523C07Rik		4930523C07RIK
Olfr698		OLFR698
Bcor		BCOR
Pdha1		PDHA1
Asb3		ASB3
Prlhr		PRLHR
Cnot8		CNOT8
Arl9		ARL9
Olfr669		OLFR669
Smad3		SMAD3
Fam183b		FAM183B
Lrrc72		LRRC72
Cep112		CEP112
Snap91		SNAP91
Fam159a		FAM159A
Tchhl1		TCHHL1
Socs5		SOCS5
Satb1		SATB1
Pygm		PYGM
Wtap		WTAP
Adgrb3		ADGRB3
Rnase11		RNASE11
Gal		GAL
Gpr150		GPR150
Frmd6		FRMD6
Vmn2r5		VMN2R5
Vmn1r27		VMN1R27
Anxa3		ANXA3
Satl1		SATL1
Tsc2		TSC2
Nipa2		NIPA2
Vmn1r24		VMN1R24
Defb28		DEFB28
Rnf146		RNF146
Rab32		RAB32
Phf21b		PHF21B
Slc29a2		SLC29A2
Atp2b4		ATP2B4
Fam122a		FAM122A
Garem		GAREM
Gal3st3		GAL3ST3
Drg1		DRG1
Klhl9		KLHL9
Wdr89		WDR89
Ceacam13		CEACAM13
Fsip1		FSIP1
Fastk		FASTK
Lrch4		LRCH4
Vmn1r38		VMN1R38
Ambra1		AMBRA1
Mef2d		MEF2D
Hoxd4		HOXD4
Neu1		NEU1
Sptbn1		SPTBN1
Cask		CASK
Pcdhgc5		PCDHGC5
Ube2r2		UBE2R2
Ptprs		PTPRS
Klrb1		KLRB1
Chat		CHAT
Gkap1		GKAP1
Sncg		SNCG
Ust		UST
Ankrd49		ANKRD49
Usp3		USP3
Cxxc1		CXXC1
Zfp821		ZFP821
Pin1rt1		PIN1RT1
Cdk5r2		CDK5R2
Ecscr		ECSCR
Btbd11		BTBD11
Olfr127		OLFR127
Pip4k2b		PIP4K2B
Olfr1057		OLFR1057
Cks1brt		CKS1BRT
Kcnk1		KCNK1
Ncoa1		NCOA1
Nudt14		NUDT14
Galnt1		GALNT1

## Sheet: spheroid N H (4 out 6)-N 
Names	total	elements
Hypoxia Normoxia Spheroid	648	Hist1h3h	HIST1H3H
		Rbm39	RBM39
		Tpt1	TPT1
		Ssu72	SSU72
		Ruvbl2	RUVBL2
		Copa	COPA
		Eif2b2	EIF2B2
		Thoc3	THOC3
		Polr3c	POLR3C
		Psma4	PSMA4
		Polr2a	POLR2A
		Igbp1	IGBP1
		Rps6	RPS6
		Bccip	BCCIP
		Nelfcd	NELFCD
		Rplp2	RPLP2
		Cenpn	CENPN
		4930467E23Rik	4930467E23RIK
		Arcn1	ARCN1
		Chmp6	CHMP6
		Rpl23a	RPL23A
		Kdsr	KDSR	3-Ketodihydrosphingosine Reductase
		Mcm3	MCM3
		Haus7	HAUS7
		Sdad1	SDAD1
		Trappc5	TRAPPC5
		Gtf2e2	GTF2E2
		Mms19	MMS19
		Nutf2	NUTF2
		Lsg1	LSG1
		Acsl4	ACSL4
		Hypk	HYPK
		Utp20	UTP20
		Trappc3	TRAPPC3
		Arih1	ARIH1
		Dctn6	DCTN6
		Tsen15	TSEN15
		Snrpe	SNRPE
		Bop1	BOP1
		Kansl3	KANSL3
		Rps28	RPS28
		Esf1	ESF1
		Cpsf3	CPSF3
		Oip5	OIP5
		Anapc10	ANAPC10
		Xpo1	XPO1
		Srp72	SRP72
		Atp6v1d	ATP6V1D
		Rbm22	RBM22
		Hscb	HSCB
		Hus1	HUS1
		Hist1h2ak	HIST1H2AK
		Trub2	TRUB2
		Cct2	CCT2
		Supt16	SUPT16
		E2f3	E2F3
		Ect2	ECT2
		Ppp1r2	PPP1R2
		Atp6v1e1	ATP6V1E1
		Cds2	CDS2
		Polr1d	POLR1D
		Prpf38a	PRPF38A
		Trmt61a	TRMT61A
		Pes1	PES1
		Rpl37	RPL37
		Orc3	ORC3
		Exosc3	EXOSC3
		Cinp	CINP
		Lrr1	LRR1
		Sacm1l	SACM1L
		Eif3c	EIF3C
		Cops6	COPS6
		Rpl14	RPL14
		Vmp1	VMP1
		Slc35b1	SLC35B1
		Pmpcb	PMPCB
		Rpp14	RPP14
		Rpl24	RPL24
		Rad9a	RAD9A
		Wdr3	WDR3
		Eif3m	EIF3M
		Zmat5	ZMAT5
		Grwd1	GRWD1
		Nedd8	NEDD8
		Gpn1	GPN1
		Dbr1	DBR1
		Xab2	XAB2
		Espl1	ESPL1
		Eef2	EEF2
		Rpsa	RPSA
		Hmgcs1	HMGCS1
		Dync1i2	DYNC1I2
		Phf5a	PHF5A
		Sf3a2	SF3A2
		Ppp2ca	PPP2CA
		Ddx5	DDX5
		Ogdh	OGDH
		Rgp1	RGP1
		Rplp0	RPLP0
		Rabggta	RABGGTA
		Eif2s1	EIF2S1
		Rpl39	RPL39
		Parg	PARG
		Pold2	POLD2
		Rpl7l1	RPL7L1
		Rfc4	RFC4
		Pisd	PISD
		Cops4	COPS4
		Cpsf3l	CPSF3L
		Racgap1	RACGAP1
		Ercc2	ERCC2
		Snapc1	SNAPC1
		Psmb1	PSMB1
		Skiv2l2	SKIV2L2
		Dpagt1	DPAGT1
		Ran	RAN
		Rpl30	RPL30
		Nsf	NSF
		Hyou1	HYOU1
		Prpf6	PRPF6
		Rbm19	RBM19
		Naa20	NAA20
		Pam16	PAM16
		Polr2f	POLR2F
		Aldh18a1	ALDH18A1
		Timeless	TIMELESS
		Usp39	USP39
		Ints3	INTS3
		Prpf19	PRPF19
		Dmap1	DMAP1
		Lars2	LARS2
		Eif2b4	EIF2B4
		Vmn1r128	VMN1R128
		Vars2	VARS2
		Csnk2b	CSNK2B
		Riok1	RIOK1
		Cenpw	CENPW
		Top1	TOP1
		Cct4	CCT4
		Ykt6	YKT6
		Rpl8	RPL8
		Lsm2	LSM2
		Vcp	VCP
		Nup93	NUP93
		Adat2	ADAT2
		Actb	ACTB
		Gm5148	GM5148
		Mtpap	MTPAP
		Actr2	ACTR2
		Aldoa	ALDOA
		Dimt1	DIMT1
		Rpn1	RPN1
		Snupn	SNUPN
		Imp4	IMP4
		Rac1	RAC1
		Ash2l	ASH2L
		Ext1	EXT1
		Alg1	ALG1
		Kat5	KAT5
		Banf1	BANF1
		Tut1	TUT1
		Ppp1cb	PPP1CB
		Arl2	ARL2
		Mrps27	MRPS27
		Trmt112	TRMT112
		Hist1h3c	HIST1H3C
		Srsf3	SRSF3
		Rpl26	RPL26
		Snrnp25	SNRNP25
		Mrpl52	MRPL52
		Psmb4	PSMB4
		Spc24	SPC24
		Ddx54	DDX54
		Rpl5	RPL5
		Wbscr22	WBSCR22
		Ciao1	CIAO1
		Mettl16	METTL16
		Cdk1	CDK1
		Usp36	USP36
		Cenpm	CENPM
		Rps15a	RPS15A
		Eif1ad	EIF1AD
		Wrb	WRB
		Magoh	MAGOH
		Spcs2	SPCS2
		Polr2c	POLR2C
		Mrpl55	MRPL55
		Crcp	CRCP
		Pfn1	PFN1
		Exosc7	EXOSC7
		Emc8	EMC8
		Rps14	RPS14
		Atp6v1a	ATP6V1A
		Dhx37	DHX37
		Pop7	POP7
		Chaf1b	CHAF1B
		Eif4a1	EIF4A1
		Napa	NAPA
		Dynlrb1	DYNLRB1
		Mfap1a	MFAP1A
		Gm4836	GM4836
		Tomm22	TOMM22
		Rpl32	RPL32
		Med30	MED30
		Hist1h2ae	HIST1H2AE
		Cct5	CCT5
		Sap18	SAP18
		Imp3	IMP3
		Nol10	NOL10
		Uxt	UXT
		Uba1	UBA1
		Hsd17b12	HSD17B12
		Pyroxd1	PYROXD1
		Dad1	DAD1
		Srp19	SRP19
		Hist1h2an	HIST1H2AN
		Zfp335	ZFP335
		Dhdds	DHDDS
		Smu1	SMU1
		Ttc27	TTC27
		Nubp1	NUBP1
		Emg1	EMG1
		Pold3	POLD3
		Gmppb	GMPPB
		Rars2	RARS2
		Prim1	PRIM1
		Gm14632	GM14632
		Eif6	EIF6
		Sf3b6	SF3B6
		Eif5	EIF5
		Rps21	RPS21
		Rpl10	RPL10
		Abt1	ABT1
		Wars2	WARS2
		Ddx20	DDX20
		Ints1	INTS1
		Hist1h2ao	HIST1H2AO
		Dnmt1	DNMT1
		Polr3k	POLR3K
		Atp6v0d1	ATP6V0D1
		Dkc1	DKC1
		Rpl35a	RPL35A
		Csnk1a1	CSNK1A1
		Sos1	SOS1
		Ik	IK
		Nfs1	NFS1
		Pwp2	PWP2
		Farsb	FARSB
		Farsa	FARSA
		Polr2l	POLR2L
		Hspa8	HSPA8
		Ctdp1	CTDP1
		Wdr12	WDR12
		Naca	NACA
		Usb1	USB1
		Snrpb	SNRPB
		Ddx56	DDX56
		Rpl37a	RPL37A
		Snrpg	SNRPG
		Polr1a	POLR1A
		Cct7	CCT7
		Eef1e1	EEF1E1
		Tubgcp3	TUBGCP3
		Tnpo3	TNPO3
		Rpl34	RPL34
		Gtf3c1	GTF3C1
		Wbp11	WBP11
		Psmg4	PSMG4
		Fxn	FXN
		Sdha	SDHA
		Dtymk	DTYMK
		Tra2b	TRA2B
		Taf12	TAF12
		Ddx41	DDX41
		Hspe1	HSPE1
		Actr3	ACTR3
		Pmpca	PMPCA
		Dut	DUT
		Ints8	INTS8
		Psma6	PSMA6
		Wdr36	WDR36
		Cwc22	CWC22
		Spcs3	SPCS3
		Sf3b4	SF3B4
		Vmn1r149	VMN1R149
		Polrmt	POLRMT
		Nsl1	NSL1
		Lsm5	LSM5
		Fau	FAU
		Atp6v0c	ATP6V0C
		Hist1h4n	HIST1H4N
		Nhp2	NHP2
		Nars	NARS
		Exosc5	EXOSC5
		Rps23	RPS23
		Orc1	ORC1
		Polr3b	POLR3B
		Wdr73	WDR73
		Ncbp1	NCBP1
		Lsm12	LSM12
		Taf8	TAF8
		Plrg1	PLRG1
		Exosc4	EXOSC4
		Telo2	TELO2
		Rtcb	RTCB
		Acly	ACLY
		Lamtor3	LAMTOR3
		Rps10	RPS10
		9030624G23Rik	9030624G23RIK
		Ckap5	CKAP5
		Dna2	DNA2
		Hspa5	HSPA5
		Rfc5	RFC5
		Zpr1	ZPR1
		Rpl13	RPL13
		Hnrnpl	HNRNPL
		Polr1c	POLR1C
		Usp8	USP8
		Rangap1	RANGAP1
		Psmc3	PSMC3
		Rpl9	RPL9
		Ogt	OGT
		Rabggtb	RABGGTB
		Prpf8	PRPF8
		Cct3	CCT3
		Tardbp	TARDBP
		Pdcd7	PDCD7
		Nelfb	NELFB
		Pcna	PCNA
		Snrpd1	SNRPD1
		Osgep	OSGEP
		Rpl6	RPL6
		Metap2	METAP2
		Deb1	DEB1
		Gm8693	GM8693
		Psmb7	PSMB7
		Nip7	NIP7
		Txnrd1	TXNRD1
		Rad1	RAD1
		Tcp1	TCP1
		Polr2j	POLR2J
		Rps3	RPS3
		Qars	QARS
		Etf1	ETF1
		Sf3a1	SF3A1
		Eif3i	EIF3I
		Sf1	SF1
		Hinfp	HINFP
		Gins2	GINS2
		Brf1	BRF1
		Vmn2r40	VMN2R40
		Dph3	DPH3
		Wdr18	WDR18
		Rars	RARS
		Ddx10	DDX10
		Psma3	PSMA3
		Noc3l	NOC3L
		Ska2	SKA2
		Eif2b3	EIF2B3
		Cenpo	CENPO
		Gpkow	GPKOW
		Top2a	TOP2A
		Rps27rt	RPS27RT
		Rps5	RPS5
		Utp6	UTP6
		Sepsecs	SEPSECS
		Gpn2	GPN2
		Clns1a	CLNS1A
		Pgm3	PGM3
		Hsd17b10	HSD17B10
		Trappc4	TRAPPC4
		Hist1h2bk	HIST1H2BK
		Rpl36	RPL36
		Rps25	RPS25
		Actl6a	ACTL6A
		Cse1l	CSE1L
		Nop2	NOP2
		Taf2	TAF2
		Anapc2	ANAPC2
		Cdan1	CDAN1
		Bysl	BYSL
		Cpsf4	CPSF4
		Cdc37	CDC37
		Slc39a7	SLC39A7
		Wdr5	WDR5
		Cct8	CCT8
		Mcm2	MCM2
		Znhit2	ZNHIT2
		Snrpf	SNRPF
		Ttk	TTK
		Exosc2	EXOSC2
		Pop4	POP4
		Eif5a	EIF5A
		Polr2g	POLR2G
		Ddx27	DDX27
		Sf3b5	SF3B5
		Chek1	CHEK1
		Fcf1	FCF1
		Sys1	SYS1
		Ddost	DDOST
		Tars	TARS
		Lin52	LIN52
		Rps2	RPS2
		Exosc9	EXOSC9
		Hnrnpc	HNRNPC
		Rpl21	RPL21
		Tubb5	TUBB5
		Psmb6	PSMB6
		Pole2	POLE2
		Nhp2l1	NHP2L1
		Rad50	RAD50
		Rpl7a	RPL7A
		Dcaf13	DCAF13
		Rrp7a	RRP7A
		Nhlrc2	NHLRC2
		Hars	HARS
		Dhx33	DHX33
		Orc5	ORC5
		Snrnp35	SNRNP35
		2410131K14Rik	2410131K14RIK
		Smarcb1	SMARCB1
		Arfrp1	ARFRP1
		Rpf2	RPF2
		Thap11	THAP11
		Zbtb8os	ZBTB8OS
		Lamtor2	LAMTOR2
		Timm23	TIMM23
		Pgd	PGD
		Fam50a	FAM50A
		Cpsf1	CPSF1
		Fntb	FNTB
		Wdr70	WDR70
		Yeats4	YEATS4
		Dars	DARS
		Paics	PAICS
		Sfpq	SFPQ
		Med11	MED11
		Pcid2	PCID2
		Vmn1r183	VMN1R183
		Puf60	PUF60
		Bub3	BUB3
		Rtel1	RTEL1
		Rbx1	RBX1
		Scap	SCAP
		Ankle2	ANKLE2
		Sf3a3	SF3A3
		Heatr1	HEATR1
		Phb	PHB
		Psma1	PSMA1
		Ppp6c	PPP6C
		Rpl38	RPL38
		Rpl18a	RPL18A
		Tbca	TBCA
		Gtf2h4	GTF2H4
		Gemin5	GEMIN5
		Gemin6	GEMIN6
		Rcc1	RCC1
		Srp9	SRP9
		Rpp30	RPP30
		Chordc1	CHORDC1
		Msto1	MSTO1
		Polr3f	POLR3F
		Hist1h2ac	HIST1H2AC
		Smarca4	SMARCA4
		Pfdn5	PFDN5
		Rps27	RPS27
		Mars	MARS
		Pole	POLE
		Rpa1	RPA1
		BC052040	BC052040
		Mcm4	MCM4
		Ap2b1	AP2B1
		Kat8	KAT8
		Fnta	FNTA
		Atr	ATR
		Nup160	NUP160
		2022-09-07	44811
		Cirh1a	CIRH1A
		Polr2e	POLR2E
		Golt1b	GOLT1B
		Snrpa1	SNRPA1
		Rps3a1	RPS3A1
		Rft1	RFT1
		Pkm	PKM
		Pold1	POLD1
		Prim2	PRIM2
		Ints9	INTS9
		Smc1a	SMC1A
		Rae1	RAE1
		Eif4a3	EIF4A3
		Pstk	PSTK
		Nudt21	NUDT21
		Txnl4b	TXNL4B
		Exosc8	EXOSC8
		Slc7a11	SLC7A11
		Rpl23	RPL23
		Hspa9	HSPA9
		Pfdn6	PFDN6
		Mfap1b	MFAP1B
		Vmn1r143	VMN1R143
		Sars	SARS
		Timm10	TIMM10
		Txnl4a	TXNL4A
		Polr3a	POLR3A
		Psmd6	PSMD6
		Pdrg1	PDRG1
		Pwp1	PWP1
		Nubp2	NUBP2
		Mak16	MAK16
		Mms22l	MMS22L
		Gart	GART
		Rrp9	RRP9
		Lsm6	LSM6
		Atp6v1g1	ATP6V1G1
		Sod1	SOD1
		Mis18a	MIS18A
		Rnpc3	RNPC3
		Rpl3	RPL3
		Rpap1	RPAP1
		Rps9	RPS9
		Arpc4	ARPC4
		Eefsec	EEFSEC
		Taf1c	TAF1C
		Gtf2h3	GTF2H3
		Polr3h	POLR3H
		Vrk1	VRK1
		Cdk9	CDK9
		Alg2	ALG2
		Mbtps1	MBTPS1
		Psmb3	PSMB3
		Pgam1	PGAM1
		Nop10	NOP10
		Kti12	KTI12
		Hspd1	HSPD1
		Gmps	GMPS
		Mcm7	MCM7
		Slmo2	SLMO2
		Hist1h3b	HIST1H3B
		Ddx47	DDX47
		Ndor1	NDOR1
		Cars	CARS
		Nup107	NUP107
		Hist1h2ai	HIST1H2AI
		Skp1a	SKP1A
		Hist1h2ap	HIST1H2AP
		Kars	KARS
		Ppil2	PPIL2
		Ptar1	PTAR1
		Uba52	UBA52
		Ddx55	DDX55
		Cdt1	CDT1
		Dync1h1	DYNC1H1
		Srsf7	SRSF7
		Terf1	TERF1
		Pabpn1	PABPN1
		Lars	LARS
		Cstf1	CSTF1
		Fdxr	FDXR
		Srsf1	SRSF1
		Kctd10	KCTD10
		Vps25	VPS25
		Eif3f	EIF3F
		Polg2	POLG2
		Mrpl43	MRPL43
		Rpa2	RPA2
		BC061237	BC061237
		Nop58	NOP58
		Tonsl	TONSL
		Rps13	RPS13
		Dohh	DOHH
		Rps29	RPS29
		Usp7	USP7
		Mybl2	MYBL2
		Dhps	DHPS
		Ints7	INTS7
		Lsm4	LSM4
		Phb2	PHB2
		Wdr74	WDR74
		Lsm11	LSM11
		Adsl	ADSL
		Gnl3	GNL3
		Mcrs1	MCRS1
		Spns1	SPNS1
		Supv3l1	SUPV3L1
		Gfpt1	GFPT1
		Ccdc115	CCDC115
		Psma5	PSMA5
		Fen1	FEN1
		Psmd4	PSMD4
		Actr6	ACTR6
		Sf3b2	SF3B2
		Mocs3	MOCS3
		Ncbp2	NCBP2
		Sf3b3	SF3B3
		Rrm1	RRM1
		Ggps1	GGPS1
		Eaf1	EAF1
		Exoc8	EXOC8
		Tubg1	TUBG1
		Anapc11	ANAPC11
		Wars	WARS
		Sec61a1	SEC61A1
		Nle1	NLE1
		Mcm5	MCM5
		Med20	MED20
		Ppp1r8	PPP1R8
		Krr1	KRR1
		Ppp2r3c	PPP2R3C
		Cenpa	CENPA
		Ddx23	DDX23
		Rrp12	RRP12
		Psmb2	PSMB2
		Iscu	ISCU
		Prmt5	PRMT5
		Birc5	BIRC5
		D2Wsu81e	D2WSU81E
		Rpl35	RPL35
		Clp1	CLP1
		Bms1	BMS1
		Tufm	TUFM
		Btf3	BTF3
		Ccnh	CCNH
		Ddx49	DDX49
		Adat3	ADAT3
		Mat2a	MAT2A
		Aars	AARS
		Rpl11	RPL11
		Cdc16	CDC16
		Pafah1b1	PAFAH1B1
		Cltc	CLTC
		Eif3d	EIF3D
		Rpl12	RPL12
		Rpl4	RPL4
		Mad2l1	MAD2L1
		Nrf1	NRF1
		Lyrm4	LYRM4
		Prelid1	PRELID1
		Orc6	ORC6
		Polr1b	POLR1B
		Rsl24d1	RSL24D1
		Hist1h2bp	HIST1H2BP
		Tuba1c	TUBA1C
		Romo1	ROMO1
		Polr2b	POLR2B
		Gm10406	GM10406
		Rpl19	RPL19
		Aamp	AAMP
		Ube2i	UBE2I
Normoxia Spheroid	81	Ncapg2	NCAPG2
		Faf2	FAF2
		Cenph	CENPH
		Mrpl18	MRPL18
		Hdac3	HDAC3
		Prpf4	PRPF4
		Rpl7	RPL7
		Rcl1	RCL1
		Gfm1	GFM1
		Dnajc13	DNAJC13
		Drosha	DROSHA
		Ocrl	OCRL
		Oraov1	ORAOV1
		Mup16	MUP16
		Trp53rk	TRP53RK
		Mrps7	MRPS7
		Polr3e	POLR3E
		Mcat	MCAT
		Gm3701	GM3701
		Srrd	SRRD
		Glrx5	GLRX5
		Rbmx2	RBMX2
		Tango6	TANGO6
		Sde2	SDE2
		Dnajc2	DNAJC2
		Plk1	PLK1
		Ttc4	TTC4
		Gpx4	GPX4
		Rpp25l	RPP25L
		Hmgb1	HMGB1
		Nup85	NUP85
		Preb	PREB
		Rfc3	RFC3
		Cebpz	CEBPZ
		Tsg101	TSG101
		Elac2	ELAC2
		Gfer	GFER
		Cdc5l	CDC5L
		Rrn3	RRN3
		Cog3	COG3
		Gemin2	GEMIN2
		Trmu	TRMU
		Atp6v1f	ATP6V1F
		Wdr43	WDR43
		Rrp15	RRP15
		Rsl1d1	RSL1D1
		Gcn1l1	GCN1L1
		Trmt6	TRMT6
		Pdcd2	PDCD2
		Tmem199	TMEM199
		Yars2	YARS2
		Ddx39b	DDX39B
		Vars	VARS
		Eif2b5	EIF2B5
		Nop14	NOP14
		Mrps25	MRPS25
		Rragc	RRAGC
		Ercc3	ERCC3
		Uba3	UBA3
		Ints4	INTS4
		Gtf3a	GTF3A
		Cmpk1	CMPK1
		Ppie	PPIE
		1810026J23Rik	1810026J23RIK
		Ctu2	CTU2
		Snrnp70	SNRNP70
		Mipep	MIPEP
		Lamtor4	LAMTOR4
		Cmtr1	CMTR1
		Utp18	UTP18
		Cd2bp2	CD2BP2
		Spata5	SPATA5
		Cdk7	CDK7
		Fam96b	FAM96B
		Dolk	DOLK
		Arpc2	ARPC2
		Triap1	TRIAP1
		Atl2	ATL2
		Cenpk	CENPK
		Sdhb	SDHB
		Psmg3	PSMG3
Hypoxia Spheroid	117	Gtf3c5	GTF3C5
		Osbp	OSBP
		Mrps22	MRPS22
		Phax	PHAX
		Dis3	DIS3
		Vwa9	VWA9
		Topbp1	TOPBP1
		Gm3488	GM3488
		Gm10662	GM10662
		Rpp38	RPP38
		Sec13	SEC13
		Hnrnpk	HNRNPK
		Nat10	NAT10
		Gm6460	GM6460
		Ccdc94	CCDC94
		Med31	MED31
		Asun	ASUN
		Nudc	NUDC
		Nol12	NOL12
		Fh1	FH1
		Prc1	PRC1
		Psmc4	PSMC4
		Psmb5	PSMB5
		Mrpl14	MRPL14
		Rab10	RAB10
		Polr1e	POLR1E
		Gm1993	GM1993
		Vps18	VPS18
		E130309D02Rik	E130309D02RIK
		Supt5	SUPT5
		Taf1b	TAF1B
		Nus1	NUS1
		Wdr1	WDR1
		Ptpn23	PTPN23
		Taf6	TAF6
		Vps52	VPS52
		Vps33a	VPS33A
		Chmp4b	CHMP4B
		Mrps18a	MRPS18A
		U2af2	U2AF2
		Kri1	KRI1
		Ino80b	INO80B
		Asna1	ASNA1
		Urb1	URB1
		Nipbl	NIPBL
		Gm10922	GM10922
		Clcc1	CLCC1
		Ndc80	NDC80
		Ppwd1	PPWD1
		Ctu1	CTU1
		Med7	MED7
		Bap1	BAP1
		Casp8ap2	CASP8AP2
		Brf2	BRF2
		Gm6902	GM6902
		Med21	MED21
		Cand1	CAND1
		Hgs	HGS
		Rab7	RAB7
		1110004E09Rik	1110004E09RIK
		Prkra	PRKRA
		Nploc4	NPLOC4
		Atp6v1c1	ATP6V1C1
		Cdk11b	CDK11B
		Vmn1r122	VMN1R122
		Trappc8	TRAPPC8
		Pno1	PNO1
		Tbp	TBP
		Ppp2r1a	PPP2R1A
		Gm15107	GM15107
		Haus8	HAUS8
		Guk1	GUK1
		Mdn1	MDN1
		Ppp1r12a	PPP1R12A
		Recql4	RECQL4
		Gltscr2	GLTSCR2
		Rtfdc1	RTFDC1
		Crnkl1	CRNKL1
		Sars2	SARS2
		Rplp1	RPLP1
		Cops3	COPS3
		Ddb1	DDB1
		Gm17019	GM17019
		Srpr	SRPR
		Cpsf2	CPSF2
		Cog4	COG4
		Haus3	HAUS3
		Dlst	DLST
		Uqcrc1	UQCRC1
		Erh	ERH
		Slc25a26	SLC25A26
		Exoc5	EXOC5
		Ilf2	ILF2
		Rrs1	RRS1
		Pus3	PUS3
		Taf5	TAF5
		Ecd	ECD
		Cul2	CUL2
		Med8	MED8
		Haus5	HAUS5
		Letm1	LETM1
		Hnrnpu	HNRNPU
		Dctn5	DCTN5
		Incenp	INCENP
		Usp16	USP16
		Tubgcp2	TUBGCP2
		Arnt	ARNT
		Arid2	ARID2
		Gm15319	GM15319
		Rps18	RPS18
		Nol6	NOL6
		Nuf2	NUF2
		Timm50	TIMM50
		Gm14345	GM14345
		Nup155	NUP155
		Cep350	CEP350
		Ilk	ILK
Hypoxia Normoxia	332	Supt4a	SUPT4A
		Psma2	PSMA2
		Scd2	SCD2
		Rps12	RPS12
		Prpf31	PRPF31
		Dhrs7b	DHRS7B
		Max	MAX
		Hist1h2bn	HIST1H2BN
		Rfc2	RFC2
		Odc1	ODC1
		Atp1a1	ATP1A1
		Pfdn2	PFDN2
		Cnot10	CNOT10
		Mrpl57	MRPL57
		Dnajc11	DNAJC11
		Hist1h3f	HIST1H3F
		Egfr	EGFR
		Rpia	RPIA
		Ddx21	DDX21
		Ahctf1	AHCTF1
		Ddx24	DDX24
		Utp15	UTP15
		Pnpt1	PNPT1
		Ppa1	PPA1
		Wdr75	WDR75
		Ufd1l	UFD1L
		Ap2m1	AP2M1
		Ints6	INTS6
		Snapc3	SNAPC3
		Gtf2b	GTF2B
		Uqcrfs1	UQCRFS1
		Fam58b	FAM58B
		Psmc2	PSMC2
		Eef1g	EEF1G
		Snw1	SNW1
		Top3a	TOP3A
		Polr2i	POLR2I
		Snrpd2	SNRPD2
		Mre11a	MRE11A
		Gm20604	GM20604
		Vmn1r119	VMN1R119
		Ppp4c	PPP4C
		Pop1	POP1
		Polr2h	POLR2H
		Prmt1	PRMT1
		Lamtor1	LAMTOR1
		Atp6ap2	ATP6AP2
		Tbcb	TBCB
		Nudcd3	NUDCD3
		Dclre1b	DCLRE1B
		Ctcf	CTCF
		Tinf2	TINF2
		Snapc5	SNAPC5
		Cars2	CARS2
		Itgav	ITGAV
		Ube2m	UBE2M
		Eef1a1	EEF1A1
		Mettl14	METTL14
		Mrpl4	MRPL4
		Cox7b	COX7B
		Rbbp4	RBBP4
		Hist1h3d	HIST1H3D
		Ddx3x	DDX3X
		Slc3a2	SLC3A2
		Wdr77	WDR77
		Rad51	RAD51
		Rps8	RPS8
		Pnn	PNN
		Tbl3	TBL3
		Cwf19l1	CWF19L1
		Eif3a	EIF3A
		Psmd7	PSMD7
		Exosc10	EXOSC10
		Pola2	POLA2
		Smc6	SMC6
		Narfl	NARFL
		Psmc6	PSMC6
		Dnajc17	DNAJC17
		Ebna1bp2	EBNA1BP2
		Qrsl1	QRSL1
		Gtf3c3	GTF3C3
		Ints2	INTS2
		Lsm10	LSM10
		Noc4l	NOC4L
		Hist1h2ab	HIST1H2AB
		Dhx16	DHX16
		Shoc2	SHOC2
		Nmd3	NMD3
		Mtmr9	MTMR9
		Tfrc	TFRC
		Ssb	SSB
		Gnb2l1	GNB2L1
		Mtg2	MTG2
		Snrnp200	SNRNP200
		Urb2	URB2
		Eif2b1	EIF2B1
		Atp2a2	ATP2A2
		Tuba1b	TUBA1B
		Hist2h3c1	HIST2H3C1
		Gosr2	GOSR2
		Rrp1	RRP1
		Thg1l	THG1L
		Ptpn11	PTPN11
		Ahcy	AHCY
		Zwint	ZWINT
		Ldha	LDHA
		Strip1	STRIP1
		Smc3	SMC3
		Gnb1l	GNB1L
		Ipo11	IPO11
		Elp3	ELP3
		Dhx15	DHX15
		Thoc5	THOC5
		Rps19	RPS19
		Rnf20	RNF20
		Srp54b	SRP54B
		Lsm7	LSM7
		Tbcd	TBCD
		Anapc4	ANAPC4
		Snapc2	SNAPC2
		Rrm2	RRM2
		Mthfd1	MTHFD1
		Hist1h3a	HIST1H3A
		Rpp21	RPP21
		Txn1	TXN1
		Armc7	ARMC7
		Tmem258	TMEM258
		Gtf2f2	GTF2F2
		Eif3e	EIF3E
		Dnaja3	DNAJA3
		Tma16	TMA16
		U2af1	U2AF1
		Mrpl23	MRPL23
		Exoc7	EXOC7
		Gins1	GINS1
		Dnm2	DNM2
		Srebf2	SREBF2
		Pgrmc2	PGRMC2
		Nup205	NUP205
		Rbm8a	RBM8A
		Gm10408	GM10408
		Trim28	TRIM28
		Urm1	URM1
		Aifm1	AIFM1
		Alg14	ALG14
		Vmn2r47	VMN2R47
		Atp6v0b	ATP6V0B
		Nifk	NIFK
		Yars	YARS
		Ept1	EPT1
		Gm5891	GM5891
		Wdr92	WDR92
		Ciapin1	CIAPIN1
		Ddx18	DDX18
		Rpl36a	RPL36A
		Pcyt2	PCYT2
		Hist1h2bj	HIST1H2BJ
		Rps15	RPS15
		Cenpc1	CENPC1
		Tprkb	TPRKB
		Mogs	MOGS
		Seh1l	SEH1L
		Vmn1r148	VMN1R148
		Cdc45	CDC45
		Rps27a	RPS27A
		Ppat	PPAT
		Arpc3	ARPC3
		Fam98b	FAM98B
		Iars	IARS
		Cdc73	CDC73
		Pdcd11	PDCD11
		Uhrf1	UHRF1
		Gm2897	GM2897
		Ccdc84	CCDC84
		Rfc1	RFC1
		Snapc4	SNAPC4
		Samm50	SAMM50
		Rpl18	RPL18
		Cdc123	CDC123
		Upf1	UPF1
		Gps1	GPS1
		Ssbp1	SSBP1
		Rps17	RPS17
		Mybbp1a	MYBBP1A
		Abce1	ABCE1
		Sympk	SYMPK
		Msmo1	MSMO1
		Trappc1	TRAPPC1
		Sprtn	SPRTN
		Spdl1	SPDL1
		Mtor	MTOR
		Yrdc	YRDC
		Wdr82	WDR82
		Aurkb	AURKB
		Naa50	NAA50
		Eftud1	EFTUD1
		Sdhc	SDHC
		Emc1	EMC1
		Tmx2	TMX2
		Rps20	RPS20
		Trappc11	TRAPPC11
		Supt6	SUPT6
		Vmn1r107	VMN1R107
		Vps29	VPS29
		Naa35	NAA35
		Fosl1	FOSL1
		Mrpl15	MRPL15
		Polr3d	POLR3D
		Peo1	PEO1
		Tsr1	TSR1
		Zw10	ZW10
		Ftsj3	FTSJ3
		Copg1	COPG1
		Naa15	NAA15
		LOC100861615	LOC100861615
		Cdipt	CDIPT
		Traip	TRAIP
		Ppan	PPAN
		Cdc23	CDC23
		Nrde2	NRDE2
		Gtf2h2	GTF2H2
		Hist1h3g	HIST1H3G
		Lonp1	LONP1
		Rpn2	RPN2
		Gapdh	GAPDH
		Gpi1	GPI1
		Tex10	TEX10
		Elp6	ELP6
		Hist1h3e	HIST1H3E
		Gtpbp4	GTPBP4
		Emc3	EMC3
		Cdc6	CDC6
		Mecr	MECR
		Rpl27a	RPL27A
		Rps11	RPS11
		Rpl15	RPL15
		Pfas	PFAS
		Mis18bp1	MIS18BP1
		Snrpd3	SNRPD3
		Rps7	RPS7
		Dhfr	DHFR
		Pola1	POLA1
		Toe1	TOE1
		Rpl28	RPL28
		Umps	UMPS
		Ppil1	PPIL1
		Rpl10a	RPL10A
		Fam32a	FAM32A
		Atad3a	ATAD3A
		Eapp	EAPP
		Pgk1	PGK1
		Aars2	AARS2
		Ppil4	PPIL4
		Psmd14	PSMD14
		Ctr9	CTR9
		Ikbkap	IKBKAP
		Grb2	GRB2
		Ap2s1	AP2S1
		Kpnb1	KPNB1
		Asns	ASNS
		Pelo	PELO
		Hist1h2ag	HIST1H2AG
		Nars2	NARS2
		Smc4	SMC4
		Rpl31	RPL31
		BC055324	BC055324
		Aasdhppt	AASDHPPT
		Ndufab1	NDUFAB1
		Nol11	NOL11
		Prdm10	PRDM10
		Rps4x	RPS4X
		Tbcc	TBCC
		Kif11	KIF11
		Rps24	RPS24
		Psma7	PSMA7
		Lsm8	LSM8
		Rraga	RRAGA
		Snrnp40	SNRNP40
		Psmc5	PSMC5
		Junb	JUNB
		Utp23	UTP23
		Ska1	SKA1
		Oxa1l	OXA1L
		Rpl17	RPL17
		Ptbp1	PTBP1
		Rps16	RPS16
		Fbl	FBL
		Pars2	PARS2
		Pak1ip1	PAK1IP1
		Atp6v1b2	ATP6V1B2
		Nxf1	NXF1
		Smc2	SMC2
		Uso1	USO1
		Mars2	MARS2
		Sephs2	SEPHS2
		Scfd1	SCFD1
		Rbm17	RBM17
		Pggt1b	PGGT1B
		Trrap	TRRAP
		Ubtf	UBTF
		Pcyt1a	PCYT1A
		Rint1	RINT1
		Rps26	RPS26
		Eprs	EPRS
		Cenpp	CENPP
		Pnkp	PNKP
		Pmf1	PMF1
		Gnl3l	GNL3L
		Arglu1	ARGLU1
		Bud13	BUD13
		Ndrg3	NDRG3
		Ruvbl1	RUVBL1
		Ssrp1	SSRP1
		Nsmce1	NSMCE1
		Mrpl22	MRPL22
		Hist1h4h	HIST1H4H
		Dhx38	DHX38
		Pmvk	PMVK
		Vmn2r48	VMN2R48
		Amd1	AMD1
		Nxt1	NXT1
		Nsfl1c	NSFL1C
		Ube2n	UBE2N
		Yae1d1	YAE1D1
		Sbds	SBDS
		Psmc1	PSMC1
		Vprbp	VPRBP
		Cstf3	CSTF3
		N6amt1	N6AMT1
		Mis12	MIS12
		Eif4e	EIF4E
		Tipin	TIPIN
Spheroid	149	Inpp5a	INPP5A
		Hist1h4m	HIST1H4M
		Gm10413	GM10413
		Arf1	ARF1
		Vps53	VPS53
		Mad1l1	MAD1L1
		Tnpo1	TNPO1
		Ric8b	RIC8B
		Uqcrc2	UQCRC2
		Fbxw11	FBXW11
		Zscan4f	ZSCAN4F
		Rbbp6	RBBP6
		Gbf1	GBF1
		Ankrd53	ANKRD53
		Ska3	SKA3
		Mcmbp	MCMBP
		Trim43b	TRIM43B
		Prkrip1	PRKRIP1
		Sprr2k	SPRR2K
		Taf1d	TAF1D
		Pi4ka	PI4KA
		Gm10147	GM10147
		Rtf1	RTF1
		Zzz3	ZZZ3
		Ncdn	NCDN
		Tdpoz2	TDPOZ2
		Uqcrb	UQCRB
		Gps2	GPS2
		Med26	MED26
		Ccnb1	CCNB1
		Gm5634	GM5634
		Nup133	NUP133
		Cad	CAD
		Olfr125	OLFR125
		Ostc	OSTC
		Cdc40	CDC40
		Snrnp48	SNRNP48
		Gm5795	GM5795
		Gk2	GK2
		Setd2	SETD2
		Dph1	DPH1
		Kif18b	KIF18B
		Tspan14	TSPAN14
		Zfp407	ZFP407
		Hyls1	HYLS1
		Mzt1	MZT1
		Heatr3	HEATR3
		Yeats2	YEATS2
		Ccdc7	CCDC7
		Speer4d	SPEER4D
		Nedd1	NEDD1
		Thoc2	THOC2
		Pdcl3	PDCL3
		Pik3ca	PIK3CA
		Vmn1r163	VMN1R163
		Ascc3	ASCC3
		Klhl5	KLHL5
		Dynlt1f	DYNLT1F
		Ttc14	TTC14
		Anln	ANLN
		Paxbp1	PAXBP1
		Ssxb3	SSXB3
		Tln1	TLN1
		Oas1g	OAS1G
		Skp2	SKP2
		Tsen54	TSEN54
		Nadk2	NADK2
		Vmn1r158	VMN1R158
		Fam132b	FAM132B
		Med25	MED25
		Ncaph2	NCAPH2
		Vps16	VPS16
		Krtap5-2	KRTAP5-2
		Tuba1a	TUBA1A
		Mlst8	MLST8
		Prpf38b	PRPF38B
		B4galt7	B4GALT7
		Chd4	CHD4
		Slc35b2	SLC35B2
		C87414	C87414
		E2f4	E2F4
		Prpf18	PRPF18
		Rnasek	RNASEK
		Mrpl19	MRPL19
		Inpp5k	INPP5K
		Pi4kb	PI4KB
		Slc25a42	SLC25A42
		Mgat1	MGAT1
		Nme2	NME2
		Derl2	DERL2
		Ptp4a1	PTP4A1
		Mios	MIOS
		Gpr89	GPR89
		Tbc1d2b	TBC1D2B
		Stil	STIL
		Gm16513	GM16513
		Fermt2	FERMT2
		Cdca8	CDCA8
		C130026I21Rik	C130026I21RIK
		Prrg4	PRRG4
		Hist1h2bb	HIST1H2BB
		Catsperd	CATSPERD
		Gm14440	GM14440
		Tada2a	TADA2A
		Mapk1	MAPK1
		Taf11	TAF11
		Gins4	GINS4
		Gm10767	GM10767
		Bub1b	BUB1B
		Ptprh	PTPRH
		Phf23	PHF23
		Btbd9	BTBD9
		Gm6696	GM6696
		Sap30bp	SAP30BP
		Mau2	MAU2
		Tmem203	TMEM203
		Gm10104	GM10104
		Cd300a	CD300A
		Mrps16	MRPS16
		Rhox2d	RHOX2D
		Ccdc137	CCDC137
		Alyref	ALYREF
		Ccdc130	CCDC130
		Tti2	TTI2
		Nampt	NAMPT
		Grpel1	GRPEL1
		Las1l	LAS1L
		Ncapg	NCAPG
		Tkt	TKT
		Kdm4a	KDM4A
		Rbm14	RBM14
		Psmd13	PSMD13
		Ric8	RIC8
		Anapc1	ANAPC1
		Olfr482	OLFR482
		Vmn2r46	VMN2R46
		Tmem208	TMEM208
		Wdr24	WDR24
		Rpl3l	RPL3L
		Sppl3	SPPL3
		Fam20b	FAM20B
		Unc45a	UNC45A
		Gnb1	GNB1
		Gm13871	GM13871
		Nudt18	NUDT18
		Sart3	SART3
		Pfdn1	PFDN1
		Abcb7	ABCB7
		Fdx1l	FDX1L
Normoxia	227	Pabpc1	PABPC1
		Capzb	CAPZB
		Snip1	SNIP1
		Sin3a	SIN3A
		Psmg2	PSMG2
		Med4	MED4
		Psmd11	PSMD11
		Rab1	RAB1
		Ctps	CTPS
		Mrto4	MRTO4
		Amfr	AMFR
		Pop5	POP5
		Ddx52	DDX52
		Dph6	DPH6
		Dnttip2	DNTTIP2
		Smarce1	SMARCE1
		Haus2	HAUS2
		Atp5d	ATP5D
		Atpaf2	ATPAF2
		Ppp1r11	PPP1R11
		Mrps12	MRPS12
		Dda1	DDA1
		Metap1	METAP1
		Rad51d	RAD51D
		Mrpl35	MRPL35
		Mrpl11	MRPL11
		Idi1	IDI1
		Mrpl38	MRPL38
		Eftud2	EFTUD2
		Senp6	SENP6
		Mcl1	MCL1
		Eif3h	EIF3H
		Cog7	COG7
		Rfk	RFK
		Hsp90b1	HSP90B1
		Emc6	EMC6
		Wrap53	WRAP53
		Eif2s3x	EIF2S3X
		Rbm48	RBM48
		Wee1	WEE1
		Tomm40	TOMM40
		Xrcc3	XRCC3
		Uba2	UBA2
		Tamm41	TAMM41
		Prpf40a	PRPF40A
		Elp5	ELP5
		Npm1	NPM1
		Orc4	ORC4
		Trnt1	TRNT1
		Zfp207	ZFP207
		U2surp	U2SURP
		Atic	ATIC
		Upf2	UPF2
		Sec61b	SEC61B
		H2afz	H2AFZ
		Kcnk7	KCNK7
		Rnps1	RNPS1
		Bub1	BUB1
		Paf1	PAF1
		Gtf2h1	GTF2H1
		Leng1	LENG1
		Zbtb17	ZBTB17
		Dhodh	DHODH
		Mrps6	MRPS6
		Srbd1	SRBD1
		Atp5h	ATP5H
		Pgs1	PGS1
		Rpusd4	RPUSD4
		Mrpl44	MRPL44
		Tfb1m	TFB1M
		Akirin2	AKIRIN2
		Selo	SELO
		Gm14346	GM14346
		Fars2	FARS2
		Ap1m1	AP1M1
		Rpl36al	RPL36AL
		Ncaph	NCAPH
		Dctn2	DCTN2
		Pomp	POMP
		Eif3g	EIF3G
		Pdcd5	PDCD5
		Atp6v0e	ATP6V0E
		Cks2	CKS2
		Vmn1r126	VMN1R126
		Numa1	NUMA1
		Surf6	SURF6
		2810408M09Rik	2810408M09RIK
		Dusp12	DUSP12
		Ctnnbl1	CTNNBL1
		4933402N22Rik	4933402N22RIK
		Cdc20	CDC20
		Eral1	ERAL1
		Fpr2	FPR2
		Ddx46	DDX46
		Gm4175	GM4175
		Cbx3	CBX3
		Aurka	AURKA
		Sptssa	SPTSSA
		Bard1	BARD1
		D19Bwg1357e	D19BWG1357E
		Srsf11	SRSF11
		Eny2	ENY2
		Nom1	NOM1
		Dnajc9	DNAJC9
		Fip1l1	FIP1L1
		Chchd4	CHCHD4
		Cdc26	CDC26
		Mtch2	MTCH2
		Mrpl34	MRPL34
		Gabpb1	GABPB1
		Mastl	MASTL
		Chtf8	CHTF8
		Dph5	DPH5
		Elp2	ELP2
		Mrps21	MRPS21
		Rpf1	RPF1
		Gtf2a1	GTF2A1
		Naf1	NAF1
		Zcchc9	ZCCHC9
		Haus1	HAUS1
		Mrpl10	MRPL10
		Nfyb	NFYB
		Ppa2	PPA2
		Hnrnpa3	HNRNPA3
		Atf4	ATF4
		Ppp2r2a	PPP2R2A
		Ino80	INO80
		Snap23	SNAP23
		Wbscr16	WBSCR16
		Mrpl49	MRPL49
		Cep120	CEP120
		Ticrr	TICRR
		Vmn1r132	VMN1R132
		Stard7	STARD7
		Timm17a	TIMM17A
		Kansl2	KANSL2
		Zfp600	ZFP600
		Sf3b1	SF3B1
		Dcps	DCPS
		Rras2	RRAS2
		Olfr1431	OLFR1431
		Dpy30	DPY30
		Bora	BORA
		Pa2g4	PA2G4
		Pole4	POLE4
		Ireb2	IREB2
		Mtx2	MTX2
		Glrx3	GLRX3
		Gm3500	GM3500
		Mrpl39	MRPL39
		Vps35	VPS35
		Prkrir	PRKRIR
		Fam210a	FAM210A
		Dhx8	DHX8
		Eif3b	EIF3B
		Dctn4	DCTN4
		Mrps34	MRPS34
		Sub1	SUB1
		Atp5j2	ATP5J2
		Mrpl16	MRPL16
		B3gat3	B3GAT3
		Nae1	NAE1
		Wdr25	WDR25
		1110037F02Rik	1110037F02RIK
		Slc35a3	SLC35A3
		Mob4	MOB4
		Abcf1	ABCF1
		Gm4567	GM4567
		Mrpl27	MRPL27
		Dicer1	DICER1
		Nckap1	NCKAP1
		Dph2	DPH2
		Tceb2	TCEB2
		Dhx35	DHX35
		F8a	F8A
		Olfr380	OLFR380
		Ccar1	CCAR1
		Timm44	TIMM44
		Ttc1	TTC1
		Rpl29	RPL29
		A530032D15Rik	A530032D15RIK
		Gemin7	GEMIN7
		Elp4	ELP4
		Ercc6l	ERCC6L
		Card10	CARD10
		Mup8	MUP8
		Anapc5	ANAPC5
		Sae1	SAE1
		Mrpl20	MRPL20
		Gtf2a2	GTF2A2
		Zc3h3	ZC3H3
		Mrpl24	MRPL24
		Oxsm	OXSM
		Hacd2	HACD2
		Igf1r	IGF1R
		Spop	SPOP
		AU019823	AU019823
		Pinx1	PINX1
		Fcho2	FCHO2
		Thoc1	THOC1
		Itgb5	ITGB5
		Mrpl53	MRPL53
		Atp5c1	ATP5C1
		Timm13	TIMM13
		Polr2d	POLR2D
		Slc2a1	SLC2A1
		Znhit3	ZNHIT3
		Ngdn	NGDN
		Vhl	VHL
		Slc25a37	SLC25A37
		Eif5b	EIF5B
		Hnrnpa1	HNRNPA1
		Cog2	COG2
		Actr8	ACTR8
		Nup88	NUP88
		Rad17	RAD17
		Gng5	GNG5
		Gm8765	GM8765
		Gspt1	GSPT1
		Bloc1s1	BLOC1S1
		Nkap	NKAP
		Vmn2r41	VMN2R41
		Copb2	COPB2
		Atp5a1	ATP5A1
		Gm5796	GM5796
		Dars2	DARS2
		Vkorc1l1	VKORC1L1
Hypoxia	159	Foxp1	FOXP1
		Sptlc2	SPTLC2
		Wdr33	WDR33
		Alg11	ALG11
		Strap	STRAP
		Abcd4	ABCD4
		Cept1	CEPT1
		Wdr4	WDR4
		Pdgfrb	PDGFRB
		Taf7	TAF7
		Vmn1r151	VMN1R151
		Pcbp2	PCBP2
		2310011J03Rik	2310011J03RIK
		2810004N23Rik	2810004N23RIK
		Derl1	DERL1
		Ints5	INTS5
		Ehmt1	EHMT1
		Nsa2	NSA2
		Gle1	GLE1
		Ddx42	DDX42
		Psmd2	PSMD2
		Cdca5	CDCA5
		Rpl27	RPL27
		Mrps33	MRPS33
		Fignl1	FIGNL1
		Ankrd49	ANKRD49
		Rbm25	RBM25
		Smn1	SMN1
		Gm14151	GM14151
		Prkar1a	PRKAR1A
		Foxk1	FOXK1
		Nop56	NOP56
		Haus4	HAUS4
		Vps51	VPS51
		Isca2	ISCA2
		Tfb2m	TFB2M
		Sap130	SAP130
		Gars	GARS
		Nufip2	NUFIP2
		Gak	GAK
		Mrps17	MRPS17
		Gml	GML
		Srsf2	SRSF2
		Slc7a5	SLC7A5
		Cyc1	CYC1
		Zfp534	ZFP534
		Actg1	ACTG1
		Cope	COPE
		Sec22b	SEC22B
		Tsr2	TSR2
		Zfp574	ZFP574
		Ctdnep1	CTDNEP1
		Cul1	CUL1
		Psmd12	PSMD12
		Pfdn4	PFDN4
		Cul3	CUL3
		Vps39	VPS39
		Cox15	COX15
		Mvd	MVD
		Gemin8	GEMIN8
		Commd6	COMMD6
		Vac14	VAC14
		Cox20	COX20
		Hif1a	HIF1A
		Gm5458	GM5458
		Gm13279	GM13279
		Ndnl2	NDNL2
		Exoc4	EXOC4
		Mrpl28	MRPL28
		Dgcr14	DGCR14
		Psmd3	PSMD3
		Cycs	CYCS
		Dbf4	DBF4
		Cox17	COX17
		Zswim7	ZSWIM7
		Kntc1	KNTC1
		Ddx11	DDX11
		Wdr7	WDR7
		Gm21119	GM21119
		1110008L16Rik	1110008L16RIK
		Npc1	NPC1
		Gm5622	GM5622
		Cwc15	CWC15
		Tefm	TEFM
		Nop16	NOP16
		Ipo13	IPO13
		Tomm20	TOMM20
		Ppih	PPIH
		Vmn1r95	VMN1R95
		Znhit6	ZNHIT6
		Tiprl	TIPRL
		Hist1h4c	HIST1H4C
		Med22	MED22
		Alg13	ALG13
		Cxxc1	CXXC1
		Olfr153	OLFR153
		C330021F23Rik	C330021F23RIK
		Rbbp5	RBBP5
		Znrd1	ZNRD1
		Tubgcp4	TUBGCP4
		Ddx59	DDX59
		Rpain	RPAIN
		Sart1	SART1
		Ube2g2	UBE2G2
		Tyms	TYMS
		Fig4	FIG4
		Sptlc1	SPTLC1
		Rnaseh2a	RNASEH2A
		Scgb1b19	SCGB1B19
		Rnaseh1	RNASEH1
		Gm10471	GM10471
		Emc7	EMC7
		Mrpl17	MRPL17
		2700062C07Rik	2700062C07RIK
		Cdc7	CDC7
		Dscc1	DSCC1
		Slc7a6os	SLC7A6OS
		Ubr5	UBR5
		Ift74	IFT74
		Esd	ESD
		Ccna2	CCNA2
		Caml	CAML
		Adss	ADSS
		Isy1	ISY1
		Gm4305	GM4305
		Dnajc8	DNAJC8
		Vmn2r44	VMN2R44
		Zbtb11	ZBTB11
		Utp11l	UTP11L
		Adck4	ADCK4
		Srebf1	SREBF1
		Vmn1r139	VMN1R139
		Xrn2	XRN2
		Tfdp1	TFDP1
		Mrpl54	MRPL54
		Gdi2	GDI2
		Nob1	NOB1
		E4f1	E4F1
		Iars2	IARS2
		Ubl5	UBL5
		Mrps15	MRPS15
		Gm2933	GM2933
		Sec63	SEC63
		Cenpu	CENPU
		Hist2h3b	HIST2H3B
		Kdm8	KDM8
		Rpe	RPE
		Opa1	OPA1
		Get4	GET4
		Slc16a1	SLC16A1
		Kif23	KIF23
		Cep192	CEP192
		Uspl1	USPL1
		Mup9	MUP9
		Dolpp1	DOLPP1
		Prpf3	PRPF3
		Slc12a9	SLC12A9
		Fdps	FDPS
		Slc39a10	SLC39A10

## Sheet: spheroid N H (4 out 6) -P
Names	total	elements
Hypoxia Normoxia Spheroid	6	Cdkn2a		CDKN2A
		Itgb1		ITGB1
		Cblb		CBLB
		Vgll4		VGLL4
		Ambra1		AMBRA1
		Pten		PTEN
Normoxia Spheroid	6	Cnot8		CNOT8
		H2-T24		H2-T24
		Rock2		ROCK2
		Lztr1		LZTR1
		Psg23		PSG23
		Anxa3		ANXA3
Hypoxia Spheroid	3	Stk40		STK40
		Pip4k2b		PIP4K2B
		Sgpp1		SGPP1
Hypoxia Normoxia	5	Fech		FECH
		Med9		MED9
		7420461P10Rik		7420461P10RIK
		Cacna1s		CACNA1S
		Cs		CS
Spheroid	239	B4galt4		B4GALT4
		Rab13		RAB13
		Tfeb		TFEB
		Gper1		GPER1
		Vmn1r24		VMN1R24
		P4ha2		P4HA2
		Fam183b		FAM183B
		Timp4		TIMP4
		Btbd11		BTBD11
		Lrch4		LRCH4
		Ppm1e		PPM1E
		Dnajc3		DNAJC3
		Gnrh1		GNRH1
		Capzb		CAPZB
		Elf5		ELF5
		6330408A02Rik		6330408A02RIK
		Tomm34		TOMM34
		Socs5		SOCS5
		Fosb		FOSB
		Fsip1		FSIP1
		Snap91		SNAP91
		Hcls1		HCLS1
		Tchhl1		TCHHL1
		Strap		STRAP
		Prr15l		PRR15L
		Cask		CASK
		Sprr2i		SPRR2I
		Tmem160		TMEM160
		Kirrel		KIRREL
		Tctex1d4		TCTEX1D4
		Hrsp12		HRSP12
		Zfp821		ZFP821
		Defb28		DEFB28
		Smad4		SMAD4
		Fbxl20		FBXL20
		Arntl		ARNTL
		Sbp		SBP
		Tgfbr3		TGFBR3
		Cdc42ep1		CDC42EP1
		Syna		SYNA
		Eps15l1		EPS15L1
		Fbxo2		FBXO2
		Gnb2l1		GNB2L1
		Mef2a		MEF2A
		Pdha1		PDHA1
		Dnajc8		DNAJC8
		Rb1		RB1
		Cks1brt		CKS1BRT
		Naa25		NAA25
		Runx3		RUNX3
		Ebf3		EBF3
		Bves		BVES
		Pqlc2		PQLC2
		Neu1		NEU1
		Irf1		IRF1
		Lats1		LATS1
		Gal3st3		GAL3ST3
		Slc30a1		SLC30A1
		Olfr1505		OLFR1505
		Plxna2		PLXNA2
		Smad3		SMAD3
		Slc6a4		SLC6A4
		Klrb1		KLRB1
		Olfr325		OLFR325
		Chat		CHAT
		Gal		GAL
		Aph1a		APH1A
		Rock1		ROCK1
		Garem		GAREM
		Ufd1l		UFD1L
		Zfp641		ZFP641
		Gid8		GID8
		Sptbn1		SPTBN1
		Lhx1		LHX1
		Sufu		SUFU
		Cbfb		CBFB
		Jrk		JRK
		Sirpb1b		SIRPB1B
		Atp2b4		ATP2B4
		Kcnk1		KCNK1
		Nprl3		NPRL3
		Sncg		SNCG
		Olfr669		OLFR669
		Neb		NEB
		Cxxc1		CXXC1
		Pmm2		PMM2
		Basp1		BASP1
		Rab32		RAB32
		Pitpna		PITPNA
		Slc24a4		SLC24A4
		Rnf149		RNF149
		Frmd6		FRMD6
		Nes		NES
		Tgfbr1		TGFBR1
		Dynll1		DYNLL1
		2010012O05Rik		2010012O05RIK
		Commd6		COMMD6
		Sav1		SAV1
		Nipa2		NIPA2
		Zyg11b		ZYG11B
		Ncoa1		NCOA1
		Olfr1124		OLFR1124
		Ust		UST
		Ccnl1		CCNL1
		Ecscr		ECSCR
		Dnttip1		DNTTIP1
		Det1		DET1
		Fam122a		FAM122A
		Usp3		USP3
		Glis2		GLIS2
		Rnf146		RNF146
		Moap1		MOAP1
		Olfr698		OLFR698
		Rbms2		RBMS2
		Mef2d		MEF2D
		Satb1		SATB1
		Fbxo47		FBXO47
		Hrasls5		HRASLS5
		Fastk		FASTK
		Nf2		NF2
		Olfr127		OLFR127
		Enpep		ENPEP
		Mettl3		METTL3
		Tex261		TEX261
		Pdhx		PDHX
		Pygm		PYGM
		Ptprs		PTPRS
		Agtrap		AGTRAP
		Vmn1r27		VMN1R27
		Capn6		CAPN6
		Eif3h		EIF3H
		Hoxd4		HOXD4
		Smc5		SMC5
		Cyld		CYLD
		Themis2		THEMIS2
		Kmt2d		KMT2D
		Mib1		MIB1
		Tsc2		TSC2
		Vmn1r38		VMN1R38
		Slc35b4		SLC35B4
		Dapk3		DAPK3
		Npbwr1		NPBWR1
		Prmt10		PRMT10
		Ccl11		CCL11
		Slc27a4		SLC27A4
		Csde1		CSDE1
		Gpr157		GPR157
		Ckb		CKB
		Amer3		AMER3
		Tgfbr2		TGFBR2
		Calcrl		CALCRL
		Slc25a36		SLC25A36
		Thumpd2		THUMPD2
		Lrrc8a		LRRC8A
		Nek3		NEK3
		Wtap		WTAP
		Syt15		SYT15
		Fzd1		FZD1
		Galnt1		GALNT1
		Tmem135		TMEM135
		Arid2		ARID2
		Klhl20		KLHL20
		Pin1rt1		PIN1RT1
		Drg1		DRG1
		Adgrb3		ADGRB3
		Tlr12		TLR12
		Sycn		SYCN
		Nf1		NF1
		Speer2		SPEER2
		Mettl14		METTL14
		Ankrd49		ANKRD49
		Pcdhgc5		PCDHGC5
		Prb1		PRB1
		Nudt14		NUDT14
		Ppp1r3d		PPP1R3D
		Scamp1		SCAMP1
		Olfr1057		OLFR1057
		Prss51		PRSS51
		Tas2r118		TAS2R118
		Hmx3		HMX3
		Ceacam13		CEACAM13
		Rfwd2		RFWD2
		Mcoln1		MCOLN1
		Vmn2r5		VMN2R5
		Myh9		MYH9
		Ube2r2		UBE2R2
		Wdr89		WDR89
		Rbpms		RBPMS
		Slc7a3		SLC7A3
		Klhl9		KLHL9
		Slc29a2		SLC29A2
		Prlhr		PRLHR
		Palm2		PALM2
		Aven		AVEN
		Cep112		CEP112
		Snca		SNCA
		Soat1		SOAT1
		Morc2b		MORC2B
		Fam159a		FAM159A
		Fkbp1a		FKBP1A
		Cdk5r2		CDK5R2
		Tmem255b		TMEM255B
		Ap5m1		AP5M1
		Rnase11		RNASE11
		Phf21b		PHF21B
		Gpr150		GPR150
		Satl1		SATL1
		Epha1		EPHA1
		4930523C07Rik		4930523C07RIK
		Tmpo		TMPO
		Cdk5r1		CDK5R1
		Lrrc72		LRRC72
		Arl9		ARL9
		Nr2e3		NR2E3
		Eif4g2		EIF4G2
		Ccdc18		CCDC18
		Marveld3		MARVELD3
		Ctsb		CTSB
		2022-09-08		44812
		Peg12		PEG12
		Naip2		NAIP2
		Trim31		TRIM31
		Bcor		BCOR
		Ccr9		CCR9
		Cldn11		CLDN11
		Dlec1		DLEC1
		Gkap1		GKAP1
		Ptpn12		PTPN12
		Asb3		ASB3
Normoxia	56	Spint5		SPINT5
		Cd209e		CD209E
		Tbc1d24		TBC1D24
		Gpr137b		GPR137B
		Klrc3		KLRC3
		Alas1		ALAS1
		Dpp9		DPP9
		4930579F01Rik		4930579F01RIK
		Lgals12		LGALS12
		Zmynd8		ZMYND8
		N4bp3		N4BP3
		Cerk		CERK
		4921524L21Rik		4921524L21RIK
		Nprl2		NPRL2
		Ankrd34a		ANKRD34A
		Ifna15		IFNA15
		Clnk		CLNK
		Eif1ax		EIF1AX
		Ccdc101		CCDC101
		Cbln2		CBLN2
		Mansc4		MANSC4
		BC048403		BC048403
		Ctsm		CTSM
		Aida		AIDA
		Ppm1b		PPM1B
		Efnb1		EFNB1
		Olfr342		OLFR342
		Bcl2l11		BCL2L11
		Olfr1247		OLFR1247
		Zfp804a		ZFP804A
		Mospd2		MOSPD2
		Ep300		EP300
		Hmbs		HMBS
		Olfr412		OLFR412
		Sox9		SOX9
		Tecr		TECR
		Mpc1		MPC1
		Olfr1123		OLFR1123
		Scarb1		SCARB1
		Llgl1		LLGL1
		Olfr110		OLFR110
		St3gal5		ST3GAL5
		Lmna		LMNA
		Mib2		MIB2
		Lrrc73		LRRC73
		Cyp2c55		CYP2C55
		Ywhab		YWHAB
		Tsc1		TSC1
		Slc12a2		SLC12A2
		Spats2		SPATS2
		Slc4a4		SLC4A4
		Fam124a		FAM124A
		Ifrd1		IFRD1
		Idh2		IDH2
		Nrbf2		NRBF2
Hypoxia	94	Insig1		INSIG1
		Adgrl4		ADGRL4
		Popdc3		POPDC3
		Ica1		ICA1
		Gtf2h5		GTF2H5
		Cacnb3		CACNB3
		Spdya		SPDYA
		Ppfia4		PPFIA4
		Ilf3		ILF3
		Entpd2		ENTPD2
		Chpf		CHPF
		Pdzd8		PDZD8
		Ltb4r1		LTB4R1
		Chchd2		CHCHD2
		Med12		MED12
		Aph1b		APH1B
		Kitl		KITL
		Cluh		CLUH
		Slc25a20		SLC25A20
		BC051019		BC051019
		Cep89		CEP89
		Olfr1219		OLFR1219
		Zmiz1		ZMIZ1
		Scn7a		SCN7A
		Sox4		SOX4
		Tmem70		TMEM70
		Rgs5		RGS5
		Rbbp8nl		RBBP8NL
		Olfr1309		OLFR1309
		Olfr354		OLFR354
		Ndufa6		NDUFA6
		3425401B19Rik		3425401B19RIK
		Ido2		IDO2
		Zfyve27		ZFYVE27
		Hspa13		HSPA13
		Prrc1		PRRC1
		Zfp648		ZFP648
		Mrap		MRAP
		Fam71e1		FAM71E1
		Slc25a1		SLC25A1
		9530003J23Rik		9530003J23RIK
		Itgb2		ITGB2
		Tnfaip2		TNFAIP2
		1700016K19Rik		1700016K19RIK
		Atp9a		ATP9A
		Spon2		SPON2
		Glyatl3		GLYATL3
		Maml1		MAML1
		Cox18		COX18
		Ptgdr		PTGDR
		Hsd3b5		HSD3B5
		Mtus1		MTUS1
		Trpa1		TRPA1
		Cyp51		CYP51
		Irf2bp1		IRF2BP1
		Zfp65		ZFP65
		Acaca		ACACA
		Pawr		PAWR
		Tfpi2		TFPI2
		Gsk3b		GSK3B
		Pdcl2		PDCL2
		Btk		BTK
		Gna13		GNA13
		Fgd6		FGD6
		Nuak1		NUAK1
		Olfr1444		OLFR1444
		Erp44		ERP44
		Rcor1		RCOR1
		Tspan8		TSPAN8
		Galr1		GALR1
		Gm364		GM364
		Ociad1		OCIAD1
		Slc25a30		SLC25A30
		Klhdc3		KLHDC3
		2200002J24Rik		2200002J24RIK
		Ppox		PPOX
		Nwd2		NWD2
		Ccnj		CCNJ
		Olfr351		OLFR351
		Vmn1r208		VMN1R208
		Aadacl2		AADACL2
		Abhd3		ABHD3
		Tas2r114		TAS2R114
		Zbtb24		ZBTB24
		Olfr1287		OLFR1287
		2810474O19Rik		2810474O19RIK
		Stoml2		STOML2
		Surf1		SURF1
		Sh3bgr		SH3BGR
		Foxc1		FOXC1
		Cdk13		CDK13
		Fasn		FASN
		Gen1		GEN1
		Nxph2		NXPH2
