# Supplementary material for: The context-dependent epigenetic and organogenesis programs determine 3D vs. 2D cellular fitness of MYC-driven murine liver cancer cells
Source: eLife. 2025 May 6;14:RP101299. doi: 10.7554/eLife.101299 (PMC12055005; doi:10.7554/eLife.101299)
Supplement: Supplementary file 10. [file elife-101299-supp10.xlsx]

## Sheet: Normoxia negative
HIST1H3H
SSU72
COPA
EIF2B2
BC027231
TMED10
CAPZB
TRMT5
ATP13A1
RPLP2
DCTN3
GM10220
PSMG2
ZFP932
MRTO4
TRAPPC3
DCTN6
ARIH1
HIST1H4M
TSEN15
IMPDH2
ATP1A1
RNASEH2C
MRPS30
MRPL57
DNAJC11
URI1
ANAPC10
HIST1H3F
STT3A
RBM22
PNPT1
CCT2
TNPO1
CDS2
TRMT61A
FAM58B
RPL37
METAP1
EEF1G
SEC13
EIF3C
HNRNPK
MRPL38
VMN1R119
VMP1
SLC35B1
PPP4C
POP1
PTCD1
RPL24
GM15127
NEDD8
RNASEH2B
MED31
DBR1
EIF3H
EEF2
STX4A
HMGCS1
PPP2CA
EIF2S3X
ORAOV1
TECR
RABGGTA
EIF2S1
RFC4
EEF1A1
PISD
SRP54A
RPL30
RBM19
NAA20
TIMELESS
DDX3X
SLC3A2
PDCD2L
DMAP1
LARS2
MED26
VMN1R128
NOP56
NUP133
H2AFZ
YKT6
PAF1
EXOSC10
SMC6
ALG1
NUS1
TUT1
QRSL1
PGS1
MRPL44
RPL26
CYC1
MRPL52
NMD3
METTL16
CDK1
WRB
TSR2
ATP2A2
TUBA1B
CRCP
PTPN11
RPS14
EIF3G
GNB1L
POP7
GM4836
TOMM22
HIST1H2AE
GPX4
RPS19
TIMM9
UXT
UBA1
RAD54L2
PYROXD1
SRP19
ZFP335
SRP54B
NUBP1
GMPPB
LSM7
EIF6
MTHFD1
DNMT1
TMEM258
NFS1
DNAJA3
CEBPZ
FARSB
GM14393
CHMP7
NACA
DDX56
RPL37A
SNRPG
CCT7
EEF1E1
NIPBL
SRCAP
GTF3C1
GFER
ALG14
NOM1
DTYMK
YARS
GM3404
PMPCA
INTS8
FIP1L1
PCYT2
VMN1R158
POLRMT
MASTL
HIRA
ATP6V0C
BRF2
RPS27A
POLR3B
FAM98B
MVK
UHRF1
NAF1
WDR7
EXOSC4
RTCB
ZCCHC9
9030624G23RIK
DNA2
RAB7
CDC123
MLST8
RANGAP1
RPL9
RABGGTB
CCT3
TARDBP
RPS17
PCNA
CHD4
TRAPPC1
METAP2
GM8693
MTOR
TCP1
YRDC
INO80
BLM
SNAP23
SF3A1
SMG5
SCD1
HINFP
PRKDC
RPS20
TRAPPC8
TBP
VPS29
SKA2
CENPO
GPKOW
PPP2R1A
RPS5
PEO1
GPN2
CLNS1A
HSD17B10
TRAPPC4
RPL36
TRAIP
YARS2
CDC23
GTF2H2
HIST1H3G
SNRPF
RPN2
EIF5A
GPI1
CNOT11
DDX27
SF3B5
CHEK1
FCF1
HIST1H3E
MAPK14
RPS2
UQCR10
CCNF
NHLRC2
HARS
SNRPD3
DHX33
FIG4
RPS7
RPF2
POLA1
TIMM23
CPSF1
FNTB
WDR70
DARS
MED11
PCID2
BUB3
SMARCC1
DAP3
RPL10A
RPL18A
UBA3
COPS3
ATAD3A
RCC1
PPIL4
MSTO1
HIST1H2AC
PFDN5
RPS27
MARS
SLC7A6OS
GM17019
NCKAP1
SRPR
COG4
TPI1
KAT8
CHMP3
ATR
ATP6V1H
GOLT1B
PKM
FOXP4
TXNL4B
RPL29
RPL23
DIEXF
HSPA9
HAUS3
RAD21
NUBP2
CTU2
RRP9
ATP6V1G1
SOD1
ANAPC5
RNPC3
ERH
SLC25A26
TMEM242
EEFSEC
POLR3H
MFN2
UTP23
ALG2
CDK9
MBTPS1
HSPD1
KTI12
GMPS
OXA1L
RPL17
MRPS16
UTP18
KARS
PTAR1
RPS16
DYNC1H1
EXO1
TERF1
ALYREF
KCTD10
VPS25
EIF3F
PAK1IP1
DOHH
USP7
INTS7
CLASRP
USO1
MRPL12
WDR74
SCFD1
FEN1
CCDC115
RBM14
NCBP2
RPS26
EAF1
TUBG1
ANAPC11
USP16
EPRS
NUP88
DOLK
OPA1
SEC61A1
NLE1
MCM5
MED20
ARGLU1
KRR1
ARPC2
RRP12
KMT2A
ISCU
WDR24
BIRC5
D2WSU81E
KIF23
ITGB3
CLP1
BTF3
DDX49
PAK2
CLTC
VMN2R38
TIMM50
RPL4
MAD2L1
MTERF1A
EIF3K
DARS2
ORC6
CSTF3
ARID1A
TPT1
ATRIP
THOC3
BCCIP
NELFCD
ARCN1
CHMP6
RPL23A
KDSR
RPS12
HAUS7
PRPF31
MMS19
POP5
HIST1H2BN
HNF1B
RPS28
PFDN2
CPSF3
SMARCE1
XPO1
DDX21
SRP72
UTP15
HUS1
PPA1
WRN
TRUB2
WDR75
AP2M1
SUPT16
INTS6
NDUFB8
ECT2
EWSR1
RNF8
POLR1D
MRPS2
UQCRFS1
EXOSC3
KIF20A
ATXN10
GM10662
SNRPD2
LRR1
SACM1L
GFM1
NAT10
SLC12A7
GM20604
PMPCB
RAD9A
MRPL41
EIF3M
XAB2
MCMBP
ESPL1
RPSA
DYNC1I2
TAF1D
PHF5A
DDX5
RGP1
MYO9B
MUP16
SNAPC5
PIK3R4
3830403N18RIK
KIN
ELP5
ERCC2
SNAPC1
RBBP4
DPAGT1
HIST1H3D
USP39
WDR77
PRPF19
INTS3
HAUS4
RIOK1
CENPW
CCT4
WDR59
LSM2
ADAT2
ACTR2
ALDOA
CDC40
SNUPN
IMP4
RAC1
SRSF2
NOC4L
TRMT112
DHX16
SNRNP25
SHOC2
SPC24
TFRC
CIAO1
ZFP534
SSB
GNB2L1
KIF18B
MTG2
FARS2
RPL36AL
AP1M1
USP36
CENPM
SNRNP200
EIF1AD
URB2
EIF2B1
SEC22B
ZFP574
PFN1
GM4214
THG1L
LDHA
SMC3
NAPA
IPO11
MED30
CCT5
THOC5
ZFP131
DAD1
2810408M09RIK
EMG1
TBCD
SUMO2
SF3B6
SNAPC2
EIF5
RPS21
RPL10
HIST1H3A
H2-M3
DEXI
RPP21
NDNL2
POLR3K
ATP6V0D1
DKC1
RPL35A
CSNK1A1
SRSF5
ANLN
FARSA
U2AF1
MRPL23
CTDP1
BARD1
TNPO3
ELAC2
MNAT1
PSMG4
FXN
SDHA
ATP6V0B
NIFK
KEAP1
PSMD3
HSPE1
DUT
RPL36A
RPS15
VMN1R149
MTCH2
FAU
CHTF8
RPS23
PPAT
SBNO1
PDCD11
SPEER4B
WDR43
MED21
ACLY
SAMM50
HAUS1
RPL18
RFC5
UPF1
SSBP1
RSL1D1
PRPF8
TOMM70A
TEFM
NOP16
NELFB
MSMO1
GCN1L1
GM9758
2310030G06RIK
OSGEP
RPL6
SPRTN
MRPL10
PPP2R2A
WDR82
RPS3
ETF1
TRMT6
ARMC5
WBSCR16
RBMXL1
GINS2
TMX2
ZNHIT6
WDR18
VMN1R122
DDX10
VMN1R107
NOC3L
MRPL15
TOP2A
SEPSECS
NAA15
LOC100861615
ACTL6A
CNOT3
RPS25
PPAN
CSE1L
PPP1R12A
NRDE2
DNTTIP1
TAF2
BYSL
CPSF4
WDR5
DDX59
DOCK5
LONP1
ZNHIT2
TTK
POLR2G
KMT2D
TUBGCP6
GTPBP4
EMC3
TARS
RPL27A
RPS11
RPL21
TUBB5
RPL15
EIF2B5
PFAS
MRPL39
ACD
RRP7A
ORC5
2410131K14RIK
SNRNP35
SMARCB1
DHFR
RNASEH2A
ZBTB8OS
MRPS25
PUF60
RTEL1
MPHOSPH10
SARS2
BRIX1
ERCC3
HEATR1
GM16513
PSMA1
RPL38
TBCA
2700062C07RIK
C130026I21RIK
GEMIN6
DDB1
PGK1
GM4567
AARS2
SRP9
ESP6
SMARCA4
IKBKAP
POLE
RPA1
BC052040
MCM4
TCEB2
ASNS
PELO
RFT1
POLD1
EIF4A3
EXOSC8
TIMM44
AASDHPPT
GM13139
SARS
TIMM10
TXNL4A
1810026J23RIK
POLR3A
PDRG1
ISY1
RPS4X
MAK16
GART
KIF11
RPS24
ARPC4
SNRNP40
TAF1C
GTF2H3
VRK1
CHERP
PSMB3
DDX47
NDOR1
COA5
HIST1H2AI
PPIL2
UBA52
CHCHD3
LARS
PARS2
FDXR
CSTF1
SRSF1
POLG2
NOP58
TONSL
ATP6V1B2
VHL
DHPS
LSM4
OLFR1179
MARS2
PHB2
SEPHS2
LSM11
RBM17
CDK7
PGGT1B
SUPV3L1
SF3B2
FAM96B
IARS2
UBL5
PCYT1A
HAUS5
HNRNPU
HIST2H3B
RIC8
ANAPC1
PPP1R8
PPP2R3C
VMN2R46
RUVBL1
PRMT5
RPL35
TUFM
CCNH
CDC16
ATP5A1
USP5
YAE1D1
NRF1
GM14345
PRELID1
POLR1B
GANAB
HIST1H2BP
TUBA1C
FDPS
NUP155
SRSF10
ROMO1
POLR2B
RPL19
PSMG3
UBE2I
RPS6
VMN1R135
POLR2I
RAN
RPS8
RPN1
LSM10
CSTF2
POLR2C
CHAF1B
ARMC7
VMN2R47
PSMC3
MYBBP1A
PSMB7
NPLOC4
NAA25
EMC1
SUPT6
GAPDH
THAP11
CRNKL1
KPNB1
UBR5
POLR2E
SNRPA1
MFAP1B
PSMC5
THOC1
SRSF7
SMC2
GNL3L
EIF4E
STRAP
SUPT4A
RFC2
DDX24
COPS6
DOPEY2
GRWD1
TAMM41
VMN2R34
MED17
CYP2B23
MZT1
ATP6V1A
PLK1
TTC14
TXN1
GM3139
DNM2
HIST1H2BJ
HIST1H4N
IARS
GM21119
GNB2
UTP6
HIST1H2BK
C330021F23RIK
RHOX4E
YAP1
SCAP
GM10471
SMC4
VMN2R17
ITPR2
LAGE3
GNL3
D3ERTD254E
MRPL46
VPRBP
GM10406
RUVBL2
FAM73B
WDR3
NUDCD3
SDE2
GOSR2
CHMP4B
SMG1
GPS1
TUBGCP4
PKN2
SMOK3A
ESF1
SENP6
RFK
SEC62
ORC1
VMN2R40
RBBP5
PPP1R1B
GTF2H4
NDUFAB1
BRCA1
GGPS1
GSPT1
EGFR
UGGT1
AURKA
EIF3B
MYH9
FAM183B
GTF2F2
BC061212
CCDC53
LYAR
SMC1A
VMN1R143
TBCC
SAE1
MRPL14
VMN2R42
PDCD7
ARFRP1
TAZ
WDR4
DNAJC17
RPL32
PRIM1
NSL1
CENPQ
MCM3
NMT1
MRRF
TNFRSF26
SRP68
GM7861
COPB1
CDIPT
DISC1
NSMCE1
PFDN1
SUGT1
CENPE
OGDH
SKIV2L2
EBNA1BP2
4921509C19RIK
RPAP2
TTC4
SURF6
PARN
WDR12
URM1
VPS16
GEMIN5
MAU2
MRPL45
SCD2
COX11
DIS3
HIST1H2AK
RAD51D
MRPL48
BCL2L1
44625
DCLRE1B
UBE2M
ANKRD49
COX7B
TARS2
XYLT2
RAD51
COMMD8
COQ2
LCE1C
VAC14
ERAL1
U2AF2
MRPS14
BAP1
DPH5
SP1
GM2897
SLC35B2
IPO13
POLR2J
PDAP1
DCPS
MRPL36
DSCC1
USP37
VDAC1
FAM204A
UQCRQ
RPS13
GFPT1
DCTN5
UBALD2
NDRG3
DHX38
FKBP1A
HCAR2
HYPK
UQCRC2
MRE11A
SDHD
CRKL
MCL1
TSFM
WDR61
GLRX5
SLC25A23
LIG3
WARS2
DIDO1
POLR1A
CYCS
MOGS
TRMU
LSM5
KNTC1
TTC33
STARD7
GLTSCR2
VPS45
ADSS
MRPL20
CMTR1
TTI2
PSMD4
MRPS15
SF3B3
TUBGCP2
SLC39A10
MAX
OLFR1129
RPL27
CPSF3L
GARS
SRSF3
RPL5
DHX37
VMN1R200
RRM2
HIST1H2AO
GM10922
NDC80
MRPL19
VMN2R35
RPL7A
ANKLE2
PSMA7
MYOM3
POLR2D
WDR48
TRRAP
PSMB2
SNRPE
RPL7
GINS3
TBCB
CTCF
SNRPB
YEATS4
RRAGC
EMC7
BC055324
PFDN6
AARS
RPL11
PAFAH1B1
INTS1
GM5891
CAND1
CCT8
ACTR10
ATP5E
EIF3D
GTF2E2
4921524J17RIK
XRCC3
BANF1
GINS4
DCTN1
RAPGEF1
CNOT10
ATP6V1D
TAF10
SNW1
EIF4A1
NUP85
KRI1
RAD1
CFAP20
LETM1
CENPA
DCTD
UBA2
SMN1
TMA16
EIF2S2
INTS4
CIRH1A
RBBP8
TRP53RK
KRTAP4-9
RRM1
TUBGCP5
RARS2
SKP1A
U2SURP
MRPS18A
OIP5
CSNK2B
THOC2
RPL34
PRPF3
ICE2
DEB1
KANSL2
ZFP600
EFTUD2
BRAP
MED7
FBL
RPRD1B
HIST1H2BF
WDR25
POLR3F
RPP40
DHDDS
PGAM1
PLRG1
CKAP5
HUWE1
NOL6
MFN1
E4F1
N6AMT1
NCAPG2
GM3558
DLST
GEMIN8
WDR73
PRMT3
PAPSS1
SF1
COPG1
COX6C
GTF3A
GM10375
RSL24D1
EXOC7
GID4
MINOS1
GM3500
COQ4
OLFR826
RAD17
TMEM208
RRP36
G6PC
YEATS2
OST4
WARS
MRPL22
HOMER1
TOPBP1
PDIA3
RTF1
GM3701
NDUFA2
PWP2
ELP6
MRPL24
ADNP
ACTR6
GNG5
GM10413
VWA9
NPM1
TAF13
NCBP1
FANCF
UBE2CBP
SLC7A11
GEMIN7
ATP5B
WBSCR22
FTSJ3
ZC3H8
CENPU
OGFOD2
NUFIP2
HOMER3
COPE
TAF6
TSEN34
MTRR
AKT1
CACNA2D4
INTS9
OXSM
ORC2
WDR33
CEPT1
HDAC3
UROD
SOD2
UBA5
MRPL4
TAF1B
MRPS6
ATP5H
STRIP1
SMS
PQBP1
UBR4
TM2D3
H2AFY
VEZF1
AIFM1
CDC5L
PALM2
GM694
RPF1
B3GALT6
PPA2
ANKRD52
NRBP1
TYMS
DPH2
COPS8
OSR1
MRPL54
PMVK
MPHOSPH9
DPH6
PES1
OLFR332
PET117
NFAT5
SAP18
COG6
SPTSSA
HS2ST1
SMAD7
NSUN4
KCMF1
1810022K09RIK
GMCL1L
GTF2A1
APEX2
TUBAL3
SMARCAD1
CLTA
PTMA
VBP1
DCTN4
GM10767
UQCRC1
GPR12
ARF6
ITGB5
OLFR969
MOCS3
5730507C01RIK
MUP9
VMN2R54
CENPN
ELP3
RNF20
1810024B03RIK
POLR2L
TOMM20
TOMM7
PSMB6
CCNK
DLG5
CPSF2
MUP8
NOP10
FCHO2
NCAPG
DDX23
NCLN
IGBP1
ZFP846
TINF2
WEE1
ITGAV
POLR2F
UBE2V2
ASNA1
RPS10
ATF4
TSR1
RECQL4
VDAC3
RTFDC1
HIST1H1E
VMN1R72
VMN1R114
RPL3
OLFR18
PABPN1
RPS29
PNKP
OLFR340
VPS35
GM4303
MYL12A
VMN2R29
PSMD7
ZWINT
DHX15
NUP43
GM5346
MTX2
SLC25A37
RPP14
CDC45
PWP1
MCM7
PSMB4
UGP2
CENPJ
TPRKB
SLC38A2
RPAIN
CENPP
UFD1L
POLD2
NCAPD2
USPL1
GTF2H1
NOL10
OLFR1380
POLD3
SLC25A32
CCDC130
NUTF2
DEFA-RS7
EXOC4
SLC41A2
SNRPD1
ACAT3
TIMM17A
MDN1
NHP2L1
MCRS1
ALG11
CTPS
SERBP1
CWC22
ESCO2
GM428
CDT1
LY6A
RPS15A
MUP6
GEMIN4
PHKB
EXOSC5
PALM
LSM3
PVRL2
HIST1H2AP
GPR89
POLR2K
PAICS
SDHB
ATPAF2
VMN2R39
RAB8B
LIAS
EXOSC2
HAX1
TPM2
MRPL53
COQ3
EP400
OPA3
GM609
NARFL
SPCS2
NARS
CCDC50
DNASE1L3
HNRNPC
SF3A3
GP49A
TNFSF9
TMEM43
PDSS1
MIPEP
LYRM4
OLFR1173
UQCC1
SLC25A51
SEH1L
XRCC2
NUP160
MRPS17
USP1
MECR
GM13212
PSMA3
TMEM41B
UBE2N
MVD
NHP2
TIMM13
RAD50
LSM8
VPS4B
YTHDC1
FNBP4
SRBD1
MRPL32
ZFP367
AK010878
COG5
NCAPH
NAA38
BRCA2
ORM2
FAM149A
DLD
RPL7L1
XRN1
ZFP53
LPAR2
CYTH2
1700020D05RIK
SFN
PHB
NARS2
SKA1
MYH11
CPD
ALDH18A1
TLN1
CLDN10
ODF2
NUP107
RCL1
PAXIP1
MRPL40
GM13247
NOB1
OLFR1386
FAM178A
CTU1
POLR2M
PRPF38B
ABCE1
OLFR1425
AFG3L2
OLFR1245
EXOC8
SRSF6
MRPS12
PRPF4
TBL1X
METTL1
HIST1H1D
CKS1B
PEX6
RNF31
SPTLC2
MZT2
VMN1R36
GPBP1
NELFA
COQ6
TPR
TFB1M
1700001F09RIK
CETN2
TPSG1
COG8
FADS2
ATP6V1F
POLG
ALG5
ZFP281
EZH2
MAPRE1
MRPL9
TAT
RAB33B
MTHFD2
TGS1
RRS1
MESDC2
ADIPOR2
TRMT10C
OLFR1141
MBD2
AMD1
SDAD1
HIST1H4K
AURKAIP1
4930555G01RIK
CRK
EIF3E
CDH26
NUFIP1
ZW10
COMTD1
CCDC55
PHAX
BGLAP
HSCB
POLR2H
GSDMC2
TBL3
GM5148
PSMC6
TTF2
GM14346
MRPS26
NSUN2
KRTAP4-8
MFAP1A
CDC20
IK
MRPL28
D10WSU102E
CENPC1
MCM6
OLFR1136
POLR1C
TUBA1A
NUP62
PSMG1
NEDD4
TRAF3
EXOSC9
RPA3
RPL41
HIST1H2BM
PLA2G6
AP2S1
FNTA
HIST1H2AG
RAE1
BRD4
MRPL43
LMNA
EPC1
PSMA2
VMN1R151
PRMT1
NOL12
RPL8
NUP93
SUPT5
ARL2
DDX54
HIST2H3C1
VMN1R49
HSPA8
DDX41
OLFR1113
H3F3B
TAF8
SYMPK
QARS
BRF1
ARF3
GUK1
TEX10
DCAF13
UBB
NAE1
VMN1R139
PSMA5
GM11541
TIPIN
TOP3B
HIST2H2AC
ANKRD32
ARNT
GM4187
OSBP
OLFR979
MAGOH
GINS1
COG3
PPWD1
NVL
MIOS
ACTR8
GM15319
BMS1
ZFP820
COMMD4
VCP
EAPP
RPAP1
HAUS2
GPN1
KSR2
HCCS
4933402N22RIK
IREB2
RPLP1
CAGE1
TTF1
CDK12
CD3EAP
CABP1
PPP1CB
TJAP1
EIF2B3
GTF2A2
MED8
CBX4
PARG
EIF3A
PSMA4
ERGIC3
UPF2
GM14632
PAXBP1
NIP7
GTF3C4
SYS1
C330027C09RIK
PSME4
GEMIN2
VANGL1
ZFP317
VMN1R183
ELMSAN1
RPL12
H2-Q7
VMN1R82
LIPT1
GLOD5
D5ERTD577E
GM21498
MYRF
MRGPRA3
MRPL3
EGR1
OTUD6A
EIF5B
FPGS
ALDH16A1
FHOD3
DDX19A
CHD8
ZFP59
ZPR1
GM15284
VMN1R159
H2AFJ
NDUFV2
SRRT
GPR137B
SNRNP27
HSP90AA1
TRIAP1
CENPT
HMGB1
WDR46
CCDC28A
SBDS
COMMD6
NUF2
HEATR3
LAMTOR3
MRPS23
RPL39
RPS9
NGDN
DROSHA
E2F5
XRCC6BP1
ARPC3
OLFR1128
NAA35
ZFAT
MTERF4
CFDP1
GM7978
CYP4A32
FSD1
FAM209
RPE
ZC3H14
INSR
HSP90B1
PEX11G
MALSU1
PPIH
GTF2I
KANK1
MED29
PPP2R4
UNC45A
NKAP
CCSAP
OSTC
MCTP1
DDX1
GM2933
MRPL42
CCDC112
CASP8AP2
DPP7
ATP5J2
GTF3C6
PMF1
MAD1L1
ATP7A
TSC22D4
FOSL1
COMMD10
COMMD2
CAP1
WBP5
ATP6V0E
COX17
OLFR603
SNAPC3
EED
MTHFD1L
IRF3
CTDNEP1
ASF1A
RPL13
PALMD
LIN54
EPHX1
BC021891
OLFR1130
TRP53TG5
PPP6C
ABCA16
RAPGEF4
PRKAA1
PSMB1
VMN1R126
KCNN3
WFDC9
TMEM42
DNAJC9
NECAP2
USP10
COQ5
METTL11B
SMPD4
MCTS1
UBE2L3
DDX52
RSPO3
SEPHS1
PRKAB2
TSEN54
OLFR1196
RAD51C
NDUFA6
GRB2
GM14440
SNRNP70
LPPR1
CTNNB1
DNAAF2
ORC4
ERF
LIPF
SAP130
UQCC2
NOL7
HNRNPL
SPDL1
CRAMP1L
EIF3J2
AKR1C19
PHF23
ARSK
NFE2L2
BCOR
ACSL4
IDI1
PCBD1
YWHAE
SSR3
TRNT1
MAPK7
BRAT1
CD8B1
EMC8
PDCL3
WDR83
TRIM28
PLA1A
EIF3L
ZFP57
FASTKD5
VMN1R95
NEK7
THOC6
GFM2
CTR9
STOML2
ZFP799
IGF1R
ZFP442
CHN2
E430025E21RIK
UBA6
GPR55
NBN
HINT1
HOXB3
SSR1
AADAT
PCBP2
2310011J03RIK
TOP3A
NSMCE4A
BC051142
CARS2
HIST1H2AB
GLMN
GID8
INADL
CUL3
CRLS1
DDX20
NADK2
COMMD5
TMEM167
HSBP1
SLC39A7
MTRF1L
UBE2Z
VMN2R63
GM14305

## Sheet: Normoxia positive
FGFR1
BRI3
KCTD5
WDR72
FBXL5
ZFP26
MRGPRX2
CBFB
FUBP1
RCOR1
INPPL1
BAZ1A
GPR15
TSC2
DPF1
DDIT4
TSPAN15
APBB1IP
LDB1
TLX1
OLFR702
FLCN
KRT80
1110034G24RIK
ANGPT4
ZFP81
CDKN2A
NOL4L
OLFR382
MYL6
AEBP2
TSC1
SOSTDC1
LYZL1
ZFP948
UBE2Q1
FBXW7
AIP
NF2

## Sheet: Hypoxia negative
HIST1H3H
UBE2L3
SSU72
RUVBL2
COPA
EIF2B2
CD3EAP
TMED10
CAPZB
RPS6
RPLP2
CENPN
GM10220
MCM3
TRAPPC3
ARIH1
DCTN6
TSEN15
IMPDH2
ATP1A1
GM10413
HDAC3
MRPL57
DNAJC11
RHOX2G
OIP5
HIST1H3F
ANAPC10
RBM22
PNPT1
CCT2
TNPO1
CDS2
PRPF38A
TRMT61A
FAM58B
EEF1G
IDI1
SEC13
EIF3C
HNRNPK
MRPL38
EFTUD2
PDIA3
VMP1
VMN1R119
SLC35B1
POP1
PPP4C
MRPL48
HIST1H4D
WDR3
PDCL
BCL2L1
NEDD8
DBR1
EEF2
HMGCS1
DCLRE1B
SF3A2
PRDX4
RBM48
ORAOV1
TECR
RABGGTA
EIF2S1
UBA2
EEF1A1
UBE2M
PISD
B230219D22RIK
MRPL4
RACGAP1
RBM19
NAA20
TIMELESS
DDX3X
SLC3A2
LARS2
VMN1R128
CSNK2B
NOP56
STAG2
POLR1E
TBL3
NUP133
PAF1
VCP
EXOSC10
HIST2H2AC
OSTC
KLF5
DIMT1
GARS
RPN1
SMC6
SRP68
TTF2
ALG1
BANF1
SRBD1
ATP5H
TPR
PGS1
LSM10
MRPL44
RPL26
CYC1
CSTF2
RPL5
METTL16
CDK1
WRB
POLR2C
TSR2
ATP2A2
TUBA1B
CRCP
PTPN11
RPS14
STRIP1
EIF3G
GNB1L
TAF6
GM4836
GM21637
TOMM22
HIST1H2AE
UGGT1
GPX4
RPTOR
NOL10
UXT
UBR4
UBA1
PYROXD1
RNF20
GEMIN8
DEFA2
SRP19
ZFP335
THOC2
DHDDS
SMU1
NUBP1
GMPPB
ANAPC4
GM14632
EIF6
INTS1
DNMT1
U2AF2
TMEM258
NFS1
TMA16
DNAJA3
CHMP2A
CEBPZ
AURKA
PAXBP1
PWP2
FARSB
GM14393
POLR2L
NACA
DDX56
RPL37A
TSG101
D10WSU102E
CCT7
EEF1E1
NIPBL
GTF3C1
ALG14
NOM1
YARS
PMPCA
TPRKB
POLRMT
MASTL
SMG1
ATP6V0C
BRF2
RPS27A
POLR3B
FAM98B
SP1
WDR73
UHRF1
NCBP1
GM2897
NAF1
RTCB
ZCCHC9
9030624G23RIK
HSPA5
RAB7
POLR1C
MLST8
GPS1
RANGAP1
RABGGTB
CCT3
TARDBP
RPS17
PDCD7
PCNA
CHD4
TRAPPC1
METAP2
GM8693
PSMB7
SLC35B2
NIP7
TCP1
NPLOC4
YRDC
INO80
NAA25
SNAP23
EMC1
HINFP
RPS20
TRAPPC8
SUPT6
VPS29
SKA2
CENPO
EIF2B3
GPKOW
ALG5
NAA35
LSM3
PPP2R1A
FOSL1
RPS5
PDAP1
GPN2
COPG1
PGM3
TRAPPC4
CDIPT
ANAPC2
HIST1H3G
EXOSC2
MGAT1
RPN2
EIF5A
GPI1
DDX27
SF3B5
CHEK1
FCF1
SYS1
HIST1H3E
RPS2
HARS
SNRPD3
DHX33
ARFRP1
RPF2
EIF3B
TOE1
CPSF1
FNTB
WDR70
DARS
MED11
PCID2
BUB3
MYH9
ANKLE2
RPL10A
MRPL17
RPL18A
UBA3
RCC1
PPIL4
NOSIP
MSTO1
HIST1H2AC
PFDN5
RPS27
MARS
GM17019
GRB2
CPSF2
SRPR
COG4
KAT8
CHMP3
KPNB1
FNTA
ATR
ATP6V1H
GOLT1B
RPS3A1
PKM
CMPK1
TXNL4B
TTC1
SLC7A11
RPL23
DIEXF
A530032D15RIK
HSPA9
MFAP1B
MUP8
RRP9
ATP6V1G1
SNRNP70
ANAPC5
RNPC3
ERH
EEFSEC
JUNB
DCTN1
POLR3H
MFN2
UTP23
CDK9
MBTPS1
MCM7
RPL17
NUP107
UTP18
KARS
PTAR1
RPS16
TAF5
DYNC1H1
FBL
SRSF7
TERF1
EXO1
KCTD10
VPS25
PAK1IP1
EIF3F
MDM2
RPS13
DOHH
GRPEL1
WDR48
NCAPG
INTS7
CLASRP
USO1
WDR74
SCFD1
EIF5B
GFPT1
FEN1
UBA6
E4F1
GM2933
NCBP2
GPR55
RPS26
DCTN5
TUBG1
EXOC8
ANAPC11
EPRS
NUP88
DOLK
RAD17
NLE1
MCM5
MED20
ARGLU1
TMEM208
DDX23
NDRG3
D2WSU81E
BIRC5
ITGB3
CLP1
DDX49
DHX38
PAK2
CLTC
TIMM50
RPL4
LIN9
MAD2L1
PRPF3
ORC6
RSL24D1
CSTF3
THOC3
NCAPG2
IGBP1
RPRD1B
BCCIP
STRAP
ARCN1
DNLZ
RPL23A
KDSR
RPS12
HAUS7
NUTF2
POP5
RFC2
MPHOSPH9
SNRPE
PFDN2
CPSF3
SMARCE1
UTP15
SUPT16
INTS6
SRSF6
ECT2
POLR1D
CENPE
RPL7
KIF20A
ATXN10
GM10662
RPP38
SNRPD2
SACM1L
PMPCB
RAD9A
CRKL
PRMT1
MRPL41
EIF3M
GPN1
XAB2
RFK
RPSA
MRPL42
DYNC1I2
TBCB
PHF5A
DDX5
OGDH
RGP1
RPLP0
TINF2
MYO9B
MUP16
SNAPC5
RPL39
PIK3R4
TRP53RK
PARG
3830403N18RIK
TAMM41
ELP5
SNAPC1
RBBP4
SKIV2L2
DPAGT1
HIST1H3D
USP39
PRPF19
HAUS4
RIOK1
CENPW
CCT4
RPL8
LSM2
GM1993
EIF3A
ADAT2
SUPT5
ACTR2
ALDOA
SNUPN
IMP4
RAC1
DNAJC17
SRSF2
ARL2
NOC4L
TRMT112
SNRNP25
SPC24
TFRC
CIAO1
GNB2L1
KIF18B
RPS15A
EIF1AD
URB2
MZT1
PFN1
THG1L
REX2
ZWINT
LDHA
PLK1
SMC3
4930555G01RIK
RPAP2
EIF4A1
NAPA
MED30
RPL32
PDCD5
CCT5
THOC5
ZFP131
DAD1
2810408M09RIK
NUP85
EMG1
SUMO2
TBCD
SF3B6
SNAPC2
EIF5
TTC14
RPS21
RPL10
DIDO1
DDX20
RPP21
TXN1
NDNL2
CRK
POLR3K
ATP6V0D1
DKC1
CSNK1A1
EIF3E
LPAR2
UGP2
SPTSSA
FARSA
U2AF1
CTDP1
GM3139
WDR12
ZBTB1
TNPO3
ELAC2
RBM8A
MNAT1
PSMG4
SLC41A2
FXN
SDHA
ATP6V0B
KEAP1
DDX41
HSPE1
ACTR3
DUT
GEMIN2
SEC62
RPS15
VMN1R149
MOGS
NSL1
SEH1L
LSM5
IPO7
FAU
NARS
TWISTNB
RPS23
ORC1
IARS
KNTC1
PDCD11
TAF8
WDR43
VPS16
MED21
RPS10
CKAP5
SAMM50
HAUS1
RPL18
RFC5
ZPR1
TTC33
UPF1
RSL1D1
CWC15
TEFM
SYMPK
MSMO1
GCN1L1
OSGEP
RPL6
SPRTN
MRPL10
RAD1
RPS3
RNASEK
TRMT6
EIF3I
BRF1
TMX2
VMN2R40
ZNHIT6
WDR18
DDX10
CEP120
NOC3L
MED22
TOP2A
UTP6
SEPSECS
FTSJ3
CCDC53
LOC100861615
HIST1H2BK
CNOT3
RPS25
ACTL6A
PPAN
CSE1L
C330021F23RIK
PPP1R12A
ZFP600
TAF2
RBBP5
WDR5
DDX59
DOCK5
ZNHIT2
KMT2D
EMC3
TARS
NCAPD2
RPL27A
RPS11
TUBB5
RPL15
EIF2B5
PFAS
TCEB1
VBP1
ACD
RRP7A
ORC5
SNRNP35
DHFR
ZBTB8OS
RTEL1
SARS2
MPHOSPH10
SCAP
BRIX1
PPIL1
HEATR1
PSMA1
RPL38
TBCA
2700062C07RIK
GEMIN5
C130026I21RIK
GEMIN6
DDB1
AARS2
SRP9
POLR3F
IKBKAP
RPA1
MCM4
TCEB2
ASNS
RFT1
INTS9
SMC4
RPL31
EFR3A
SMC1A
AASDHPPT
PFDN6
TIMM10
TXNL4A
POLR3A
1810026J23RIK
PDRG1
NOL11
HCFC1
RPS4X
DLST
GART
TBCC
KIF11
RPS24
MIS18A
ACVR1
RPS9
ARPC4
CFAP20
SNRNP40
TAF1C
GTF2H3
ARF6
MAU2
VRK1
CHERP
DDX47
VMN1R139
STK39
PPIL2
DDX55
UBA52
LARS
CSTF1
PARS2
SRSF1
NOP58
NGDN
TONSL
ATP6V1B2
DHPS
LSM4
PHB2
SEPHS2
LSM11
RBM17
CDK7
ADSL
SUPV3L1
MCRS1
PSMD4
SF3B2
IARS2
UBL5
ACTR8
PCYT1A
HAUS5
SF3B3
HNRNPU
RRM1
GGPS1
HIST2H3B
WARS
ANAPC1
TUBGCP2
PPP2R3C
GM15319
RUVBL1
PRMT5
RPL35
TUFM
CCNH
AARS
CDC16
RPL12
USP5
YAE1D1
POLR2K
PRELID1
GANAB
VPRBP
TUBA1C
FDPS
ROMO1
POLR2B
COMMD4
GM10406
RPL19
PSMG3
UBE2I
PSMA4
STX4A
BPTF
EIF2S3X
PRPF40A
GM5795
FOXA2
IL1F10
SRSF3
POP7
CHAF1B
IMP3
ABT1
VMN2R47
DTYMK
MCOLN1
RPL9
TUBGCP4
MRPL36
RPL7A
MRPL27
NCKAP1
AP2S1
CIRH1A
RRS1
ALYREF
RBM14
COMMD7
CEP350
SRP72
ATP6V1D
MRPS12
PES1
NAT10
COPS6
CACTIN
EMC6
GM10147
ERCC2
LENG1
SHOC2
WASH1
RPL35A
DDX46
HSPA8
POLR1A
HIST1H4N
GMCL1L
EIF4ENIF1
ETF1
VMN1R107
NAA15
NRDE2
TTK
POLR2G
POLE2
NHP2L1
NSMCE2
GTF2H4
SMARCA4
NUDT21
PPIE
SARS
MRPL20
PGGT1B
MCM3AP
TIPIN
ALG11
RPL37
GM14308
RPL30
NMD3
RPL34
GFER
CWC22
RPL13
TICRR
SNRPF
GNL2
SMARCC1
INTS4
EAPP
ARPC2
ADNP
VMN2R38
NSFL1C
1700028P14RIK
HNF1B
ARF1
UFD1L
AP2M1
CENPM
DHX15
4933402N22RIK
PRIM1
PREB
SNRPB
TELO2
EXOC1
ITGB1
GUK1
RPL21
SMARCB1
PGK1
ESP6
POLD1
CDC27
ATP6V1E1
POLR2H
RRM2
VMN1R158
GTF2H2
HIST1H2AG
ALG2
CHMP6
PRPF4
SNW1
LRR1
U2SURP
ATP6V1A
HMGB1
PRPF8
TSR1
TEX10
PHB
NDOR1
RPA2
SLC25A22
NOL6
CTPS
CPSF3L
GM10922
TRAIP
FAM32A
HYPK
DDX21
CHD8
INTS3
DNM2
HIST1H2BJ
SBNO1
PEX1
CPSF4
SLC39A7
GTPBP4
RIC8
MRPS6
CCDC84
SCD1
PSMB6
USP37
CDT1
CYFIP1
SART3
XPO1
HUS1
HIST1H4K
SEC61B
CCNI
ASNA1
UBE2H
ARID5B
LETM1
ATL2
RIF1
ATP13A1
CELF1
PSMG2
SCD2
DIS3
VPS4B
RPIA
REV3L
OTUD5
RAD51D
4921524J17RIK
RNASEH2B
EED
CARNS1
FANCD2
SRP54A
SMN1
MRPL14
TARS2
PDCD2L
RAD51
TFB2M
POLA2
MFN1
QRSL1
MFAP1A
TIMM9
HHEX
ERAL1
IK
MYRF
VEZF1
MRPL28
MTR
ZBTB7A
HIRA
EXOSC5
POLR2M
DPH5
ASF1A
MYBBP1A
TXNRD1
LIAS
MED18
SF1
TIPRL
PSMA3
PEO1
A230046K03RIK
HSD17B10
YARS2
RPAIN
GTF3C4
TRAF3
UQCR10
CCNF
TYMS
RPS7
RPA3
POLA1
GNAS
MAP3K7
UMPS
RBM18
MRPL16
DSCC1
MRPL3
RNF40
UBR5
CTU2
SOD1
SMG9
SLC25A26
TMEM242
ILF2
HSPD1
OXA1L
MRPS16
HIST1H2AP
MRPL53
CCDC130
MRPL43
TAZ
USP7
TRRAP
USP16
OPA1
MBD2
TRIAP1
ISCU
MRPS11
PMVK
CBX4
GABPA
NELFCD
MRPL18
WDR4
MMS19
PRDM15
PCBP2
HAUS2
TRUB2
UQCC1
UQCRC2
UQCRFS1
GFM1
SLC12A7
GM20604
HECTD1
ESPL1
CAP1
AURKAIP1
TSFM
RRP36
WDR61
KPNA6
NPC2
ACTR10
HCCS
AP1M1
RPL36AL
HDAC1
SURF6
WARS2
COG6
UQCC2
BECN1
MRPL47
PARN
IRS2
MRPL23
SSXB3
EIF1A
NADK2
CIAPIN1
DBF4
MTCH2
COL4A1
RFC1
PPCDC
NELFB
GM1979
WDR82
KIF20B
MRPL15
NUP43
SERBP1
HAUS8
INPP5K
CKS1B
LONP1
MIOS
SPTLC1
GPR89
RNASEH2A
TLE3
PGD
MRPS25
CCDC22
GM15284
PELO
DHX35
ESD
CCNA2
GM13139
UQCRC1
CSNK2A2
SLMO2
CMTR1
COA5
FDXR
TLK2
POLG2
VHL
OST4
MARS2
CNOT7
RINT1
INCENP
PPP2R4
MRPL22
ADAT3
MRPL45
MTBP
SRSF10
MED4
ANKRD49
CDH6
PNN
VPS18
ELP3
HIST1H2AO
EXOSC4
CDC123
TUBA1A
SF3A1
SMG5
CCT8
EXOSC9
CCNK
PSMA7
NOP10
BC061237
CENPP
KRR1
RRP12
KIF23
PPCS
HIST1H2BN
GM3488
KIN
SNRNP200
PPAT
TMEM80
QARS
VMN1R122
DCTN4
POLE
HIST1H2BB
EXOC2
EIF4A3
SAE1
CARS
XRN2
SLC2A1
RPS29
RPL11
NUF2
PAFAH1B1
EIF3D
CAGE.CONTROL.G48536
POLR1B
HIST1H2BP
PPP2CA
LSM7
BAP1
TBP
GRPEL2
DEFA21
TIMM17A
BORA
VMN1R183
LSM8
FNBP4
NSA2
NUDC
RPL27
GAPDH
THAP11
RPAP1
ZFC3H1
IFNA6
ARHGEF7
DHX16
RRN3
GM15085
WDR25
CENPA
DHX37
TAF12
RAE1
GRWD1
POLD2
RBX1
OSBP
2410131K14RIK
PMF1
LIN54
IPO13
FAM204A
EAF1
IPO11
RECQL4
PTBP1
NOB1
NRF1
AQR
MMP21
1110051M20RIK
ZBTB17
AATF
HAUS3
LAS1L
SDAD1
CCNB1
H2-M10.3
TIMM44
CDC5L
H2AFZ
CDC23
NHLRC2
KMT2A
SLC22A28
ZFP207
ELP2
NRCAM
RTF1
NEDD1
DCPS
SLC7A6OS
PSTK
GMPS
N6AMT1
RAPGEF1
TPT1
SUPT4A
GATB
VMN1R151
MRPS2
LDLR
DUSP10
HIST1H4B
UXS1
MRPL55
GM21119
TOMM70A
MDN1
SF3A3
RPS18
COX11
STT3A
PPP1R11
ARPC5L
POLR2I
NUDCD3
XYLT2
COMMD8
CHMP7
TMEM199
POLR2E
TIMM13
FOXK1
GLMN
CCNB2
GM4567
TAF11
RPL3
GNL3
RBM25
MRPS17
ATP6AP1
MTRR
PKN2
PAX2
TUBD1
TAF1D
MRPS28
RPL7L1
VARS2
MRPS21
LSM12
SMC5
DHRS7B
ACSL4
AHCTF1
TOPBP1
C1QBP
DDX39B
FKBPL
FBXW11
MRE11A
ATG16L1
CDC40
MMACHC
MRPL40
CHAF1A
PABPN1
FAM96B
GTF3C5
DCTN3
RNASEH2C
METAP1
PTCD1
LARP7
EIF3H
MTX3
XRCC3
PRPF6
NELFA
XLR3A
HEATR3
ZFP787
GM5891
SF3B4
NHP2
MRPL33
1110008L16RIK
ATG5
MTA2
SLC38A2
MICAL3
FAM189A2
THOC6
KRTAP5-3
MRPL9
KRT12
DNAJA2
OLFR205
MIPEP
ZMYM6
HRNR
RPE
PPM1G
TXN2
EIF3K
MAEL
SUGT1
DPH6
GM13275
LAMTOR1
CTCF
NUP93
MTG2
ZFP574
DNAJC2
TTC4
SAP18
HSD17B12
HIST1H1D
SKP2
CYCS
RPL36A
TRMU
1810022K09RIK
CHTF8
XRCC2
ZW10
CRAMP1L
WIPF2
VPS45
PNPO
NME6
PLSCR5
NAMPT
MED29
SFSWAP
DCP2
2810004N23RIK
SRFBP1
RPL24
UBE2E3
RAN
DMAP1
RPS8
VMN1R47
SDE2
NUP214
CHMP4B
MTHFD1
JTB
MCM6
ABCE1
POLR2J
CLNS1A
RPL36
SF3B1
A430089I19RIK
2700060E02RIK
SRF
RAD21
NUBP2
UTP11L
TGS1
BRD4
PGAM1
THOC1
PRPF4B
PSMA2
RPS28
DDX24
EXOSC3
GINS3
NARFL
HIST2H3C1
GM4214
LY9
ATP6V0E
TTC27
SPCS3
GTF2A1
GM9758
AURKB
TAS2R116
DDOST
MIS18BP1
DCAF13
GM13154
UNC5A
PSMA5
SUGP1
SPTLC2
NUDT15
CAGE.CONTROL.G33759
GM3701
GM7978
DDX19A
RAPH1
TUBGCP3
RHOX4E
BMS1
GEMIN4
CDC20
ESF1
CENPJ
MTX2
HIST1H2AI
UNC45A
DCAF7
SNX14
ATAD3A
ATP5B
OSBPL9
SSB
PUF60
GTSF1
VMN1R200
RARS
EIF2B4
YEATS2
OLFR1046
UBB
TERF2
TRAPPC5
NUS1
SNRPA1
DEB1
URI1
HIST3H2BA
NOP16
PSMD8
GM6460
MED7
SLC22A15
SKP1A
ATRIP
TAF7
OLFR906
HIST1H4M
HDGF
QRICH1
DNAH17
PI4KA
FAM173B
DHODH
GM1553
CBX3
NDC80
VMN1R95
PRR19
PKMYT1
MED12
SLC45A3
AKT1
TCERG1
PAXIP1
HYOU1
OLFR339
GM3558
RBM28
GM10471
RPLP1
ATM
ADSS
ISY1
VMN1R114
PRAF2
PBRM1
GET4
NSF
CSNK2A1
OLFR1259
YEATS4
MRPS15
NAIP6
HIST1H2AH
CASP8AP2
GLTSCR2
SMPD4
RBM33
RPUSD4
COMMD10
GM8882
DCTN2
CACNA2D4
MRPS30
ATPAF2
ATP9A
NOL12
EXOC4
GM14850
UBE2F
HGS
SSBP1
VMN1R59
LDHAL6B
WBP11
PDS5B
G6PDX
ESCO2
ATP5G1
SIN3A
SKIV2L
MCL1
GM10229
COA6
COMMD6
PALD1
HSBP1
SLC7A3
TTC7
THUMPD1
SLC47A2
CENPU
OLFR1131
5730507C01RIK
6430531B16RIK
USPL1
COX7B
COQ6
MRPL52
MORN1
GM21498
AMOTL1
4930522H14RIK
COX6C
ZFP799
PRMT7
PWP1
LEPROT
COX10
2310011J03RIK
ACSM3
KANSL2
ATP5J2
COQ5
NMT1
FKBP8
ZFAND5
OLFR1434
ADIPOR2
WIBG
TRMT10C
BIRC6
WDR75
PCDHA4
MRPL49
MECR
MRPL39
FAM172A
9830107B12RIK
COG5
MED14
CAPRIN1
VMN1R208
LOC100048884
NAA38
TSEN34
OLFR117
RARS2
MRPS14
MEPCE
RRP15
SUZ12
PRPF39
COPS8
RTCA
KDM8
DARS2
SDHB
E330017A01RIK
XRCC1
HELLS
CRISP3
EBNA1BP2
WBSCR22
HIST1H3A
GTF2F2
CAPS2
REV1
MRPL2
WBSCR16
VMN1R6
HNRNPC
RAD50
BC055324
OLFR18
ORC2
MRPL46
FGF14
POLR3C
WDR33
4930467E23RIK
GTF2E2
RPP14
ZMAT5
CSF2RB
TRNT1
YKT6
GTF2H1
PSMC6
TUT1
PPP1CB
RER1
CTDNEP1
GM21671
SRP54B
SRCAP
FIP1L1
ATP6V1F
DNA2
PRPF38B
MTOR
SEC61G
CDC37
FIG4
CRNKL1
FAM50A
PAICS
SFPQ
HIST1H4A
COPS3
SNRNP27
PSMC5
CAGE.CONTROL.G67878
MRPL12
TLR6
CCDC115
SEC61A1
DUSP14
CLIC1
EIF4E
CAGE.CONTROL.G2221
PPA1
TAF10
CAGE.CONTROL.G26297
CAGE.CONTROL.G30592
WEE1
GM4133
PSMB1
WDR77
NAGLU
1700047I17RIK2
IFNA7
GINS1
BARD1
NIFK
FUT8
NCAPH2
GM6902
GNB2
GINS2
CAGE.CONTROL.G48560
DENR
VMN1R9
ELMSAN1
USP6NL
COMMD9
HNRNPA1
IPO9
COG2
VMN2R46
CEP192
ATP5A1
GM14345
PHAX
GM14347
FNDC9
TLN1
ORM2
HIST1H3B
POLR2A
CDCA5
PSMD3
ICE1
RPS19BP1
OLFR768
RPS19
ARMC7
PPP6C
TPI1
GM10104
ARID1A
RBM39
ZFP367
RAB6A
NCOA6
SUCO
RAB5B
CDK12
TPH2
COG8
ARPC3
SNF8
OLFR1156
MESDC2
MIS12
RBBP8
GAS8
BYSL
MOB4
EAR1
GSPT1
RAB1
CINP
ADAM33
CALR
MRPL37
GLOD5
MRPS27
MAGEA1
LAYN
XLR
SCGB2B17
FASTKD5
GM13242
CTR9
ATXN2L
OLFR1111
GNL3L
GM3417
OLFR312
SGMS2
CAGE.CONTROL.G57675
MCMBP
HSP90B1
MRPS7
PSMD7
MED17
TRAPPC13
GTF2E1
ERCC3
CDC7
MAK16
CEACAM19
PNKP
MUP9
1110025L11RIK
4921539E11RIK
NUFIP2
CHRNA2
OTOR
GOSR2
VMN1R157
COMMD1
USP36
CUL3
OLFR911-PS1
DYRK2
HIST1H1E
PRL3A1
SEC63
TOMM40
ACTB
EDC4
MAFK
PRKCSH
RGSL1
NUFIP1
1200014J11RIK
SOD2
DROSHA
POLD3
KIF4
PCYT2
CTU1
MVK
VMN2R60
CDAN1
MINOS1
MANF
NUP54
E430025E21RIK
NPNT
SCN10A
TRIM39
NARS2
EXOSC8
OLFR228
JUN
ABCB7
ACTR5
DONSON
MPP2
GAB1
LCE3D
TAF1B
ELMO1
NCL
CLCC1
MS4A2
ZFP609
HSP90AB1
MTERF4
MRPS23
DISC1
RPP30
PSMD14
REEP6
OLFR1141
FOXP1
TPX2
SDHD
TBL1X
ATP9B
4732456N10RIK
CCDC153
TNFSF11
SNRPD1
BC061212
BCAS2
SSC4D
LCE1I
PRIM2
BVES
CDCA3
TBCCD1
SLC25A32
EXT2
INTS2
MVD
RQCD1
LAGE3
IFNA1
HIST1H2AN
TTC30A2
CAND1
VMN1R79
RBM34
NSMCE1
AMD1
GAR1
CTDSP1
OGN
HUWE1
METTL11B
SEPHS1
NPM1
GM5148
GNA11
RPS6KA4
OLFR652
INTS8
TIMM23
ZFP51
BBS12
TDG
AGO2
PAPOLA
ZFP384
SLC35A4
FOXR2
NSUN4
CDC73
RAB35
SFXN3
LHX2
ZFP689
GM15097
TEX30
STX7
BMPR1A
A330050F15RIK
MRTO4
EGFR
TANGO6
PDCL3
VAC14
PAPSS1
CD2BP2
POLR2D
MRPL54
VPS13A
MAT2A
CEP19
SENP6
PCNT
CRLS1
FGFR1OP
SERPINA3J
ATP6V1C1
0610010B08RIK
SLC22A29
PELP1
CHCHD3
ABCD4
CEPT1
ACIN1
FAM73B
MAD1L1
GTF2B
VMN1R36
FH1
COPS4
IRF3
COX15
D19BWG1357E
ANKS3
EIF3L
CDC45
MED27
TEKT4
CXXC1
MCM2
ELP6
OLFR733
ELMOD1
IGF1R
OLFR830
CRAT
FSD1
ASB6
CTBP1
RCL1
OLFR332
C330027C09RIK
HPCAL4
RBMX2
PRDX6
MRPS18A
COX17
H3F3A
MPRIP
RBMXL1
NDUFAF1
ZNRD1
PPP1R21
CLASP2
SUB1
CUL5
HIST1H2BF
SATL1
NFKBIL1
LZIC
DNAJC3
WSB2
OXSM
PDLIM7
MSRB3
PPP1R8
ARPP19
WBP4
ZFP934
GSAP
PDSS2
FDX1L

## Sheet: Hypoxia positive
Mettl3
Drap1
Olfr574
Smarcd1
Kctd5
Aip
Ap4s1
Irf2bp1
Dapk3
Pawr
Rock2
Smad3
Cbfb
Myl6
Atp2b1
Stmn2
Brd9
Flcn
Fgfr1
Zhx3
Baz1a
Kdm1a
Cdkn2a
Tmod3
Psmd2
4930504O13Rik
Med24
Eny2
Dr1
Mettl14
Klra17
Setdb1
1700020N15Rik
Kitl
Gm5127
Ceacam15
Idh3a
Rcor1
4930447C04Rik
Zfp446
Zfp639
Taok1
Vmn2r114
Atxn7l3
Zc3h3
Olfr1442
Olfr1048
Olfr298
6330416G13Rik
Cdc42ep1
Serpinb3b
Cmip
Inppl1
Zfp26
Vnn1
Tspan33
Ube2q1
2810007J24Rik
Vmn1r83
Clgn
Il22ra2
Fbxl2
Appbp2
Znrf3
Acvr2a
Slc2a9
Usp22
Btf3l4
Tpm1
Kcnj8
Chd7
Gna13
Cnot1
Sorbs2
Trp53
Ctsc
AI987944
Syne3
Wdr72
Fzr1
A1cf
Vgll4
Vps13c
Actn1
Aimp1

## Sheet: 3D negative
RABGGTA
MLST8
PNPT1
PSMG3
FDPS
PAK1IP1
CHMP6
TAF1C
SACM1L
PKM
TERF1
CPSF1
TBCA
PMVK
RGP1
KDSR
SSB
NDNL2
LARS
RABGGTB
PPP1R12A
ATP5H
MCM3
SEPSECS
SMC6
NEDD8
PFDN2
RTCB
POLRMT
FXN
TCEB2
RFC5
TRMT61A
SMARCE1
SNRNP40
NIPBL
MOGS
YARS2
WDR18
CENPM
MRPL15
MBTPS1
RFK
C5AR2
SNAPC2
EIF2B3
CDK7
DNMT1
SSU72
POLR1D
RIOK1
HARS
CCT7
BANF1
ATP6V0C
TUBD1
ERCC2
VPS25
NAA20
FAM98B
ATP6V1A
GPN2
GTF2H3
MRPS21
HSPD1
DPAGT1
POP1
PRPF19
SYS1
D2WSU81E
EIF6
POLR3K
SNAPC5
AP1M1
ROMO1
MRE11A
DIDO1
DHFR
DCTN6
NUBP1
WARS2
EEF2
VPS16
CEPT1
MRPL48
SMARCA4
DNAJC11
PELO
RAD51D
CCNH
TUBB5
DOCK5
ALG5
RSL1D1
GEMIN6
RAB7
OSGEP
PPIL1
SNUPN
PPAN
RAD9A
POLG2
ALYREF
SARS2
RAD1
DCTN5
NELFB
MRPL36
CDS2
ACTR2
RPAP1
UMPS
ZCCHC9
DIMT1
TOP3A
ARID5B
ALG1
RBM14
PTAR1
GFM1
DOHH
MARS
SNRPD2
MRPL41
KCTD10
MRPS18A
PPP2R2A
GPS1
RPN1
NDOR1
GGPS1
ZBTB8OS
PFDN5
TECR
MRPL52
THOC2
DNM1L
EEFSEC
RFT1
WDR77
DBR1
NFS1
CPSF4
EXOC4
SMC1A
4930467E23RIK
ADAT1
RNASEH2B
ARPC3
ARPC4
CENPO
PFDN1
XAB2
MRPS16
EIF1AD
PDIA3
GM10406
ATP6V0B
POLD1
CCT3
DDX5
DKC1
PPP2R1A
SUPV3L1
ARIH1
SAP18
NUBP2
DYNC1I2
NOP58
MRPL37
XRCC2
ASNA1
DHX33
RRP9
GOLT1B
NHP2
CYC1
PTPN11
FEN1
MRPL57
TPT1
LSM4
EIF2B2
EXOC1
YARS
EEF1G
ORAOV1
PABPN1
EIF3G
UQCR10
FAM58B
CRKL
EXOSC2
PAXBP1
NLE1
BHMT
LSM10
MED21
ESPL1
4921524J17RIK
ATR
FTSJ3
CRCP
LENG1
UTP15
AURKAIP1
IMP4
HHEX
POLR3H
KARS
DDB1
CSNK2B
CMTR1
CFAP20
NDUFV2
GLRA4
UHRF1
PMPCA
TMX2
POP7
RPS10
PAK2
ADAT2
GTF3C1
SEC13
SNAPC3
SCAP
NCKAP1
G6PC
MED30
TIMM10
EMC1
NCBP1
HSD17B10
PGD
MED20
GM15085
NUP133
PAX2
ORC5
OSTC
KCNJ9
SMC3
RPS24
ZBTB1
TFB2M
MRPL28
MRPS30
TARDBP
RPN2
GMPPB
OLFR771
VPS29
CCNB2
POP5
EIF3L
PDS5A
MTHFD1
PFN1
PISD
SLC25A26
INTS3
EIF3E
DDX49
NUS1
RANGAP1
PRDM10
TRUB2
SPCS3
PARS2
PAF1
RPS5
2700062C07RIK
HYPK
ARGLU1
NECAP2
RCC1
TAF5
LIN54
BUB3
CSNK1A1
RNASEH2C
LIN9
TIMM50
ANAPC10
HINFP
CSTF2
RPS23
SKA2
ORC1
AARS2
UTP6
HAUS3
RAD54L2
EIF3K
FARSA
LSM2
GART
CENPU
TBCC
ARL2
WRB
C330027C09RIK
MTRR
PAPSS1
HAUS7
CTIF
GFPT1
MTG2
UBALD2
SLC25A22
MTR
OLFR1136
HIST1H2AP
LEPROT
CCT2
NAT10
EIF5
PDPK1
BARD1
ATP6V0D1
CDK9
KLF6
POLR3A
2810408M09RIK
RINT1
KCNQ1
ZFP804A
CNOT10
SLC22A29
MCM2
LIPT1
EIF3F
MRPL20
CDIPT
CYFIP1
DHDDS
MRPL45
RRP7A
TUBGCP4
SNRNP25
SPC24
HUWE1
UBE2M
MRPL16
PTCD1
LPAR2
SCFD1
COX11
TRAPPC4
STT3A
NARS
POLR2L
NOM1
LOH12CR1
TIMM13
NUP43
ATRIP
TMEM242
DCTN1
HNRNPU
MASTL
FAU
ATP1A1
HAUS5
FAM173B
MAU2
CHMP3
LRG1
RAD51
NSMCE4A
GNB2L1
MUP16
PRPF3
BLM
CRAMP1L
MRPS25
INTS7
DEFA21
YRDC
ARF6
MVK
TONSL
RUVBL2
SCD2
COQ4
TNPO3
SYNGR3
WDR3
TTC14
SPEER4E
CARS2
MRPS6
GINS4
TKT
PPP1R8
FAM178A
DDX3X
UBA52
GM4836
BRF1
HNRNPL
INSL3
DNAJC17
HAUS4
AASDHPPT
MRPL55
HIST1H3F
CLASRP
DNAJA3
NUDCD3
GNB2
THOC5
RPL4
COPS5
DLD
KAT8
TUT1
CTDP1
TUBGCP5
EAPP
HOMER3
GEMIN7
PXN
GRPEL1
RAPGEF1
CBX4
NSMCE1
COQ5
SECISBP2
VMN1R163
XRCC3
TXNL4A
VMP1
ATPAF2
GM14393
HNRNPA1
RPRD1B
COPS6
SBNO1
ZNHIT2
MCRS1
KNTC1
CHERP
GPN1
CENPA
IKBKAP
OIP5
IPO13
MCM5
DNA2
NACA
TRMT6
MFN1
TTK
THUMPD2
GANAB
CHORDC1
ATP6V1B2
TAF6
GET4
ZBTB38
CDC37
URM1
SRPR
4930555G01RIK
FAM20A
CLP1
UXT
SP1
VBP1
ZWINT
PTMA
A530099J19RIK
COG8
LARS2
HCFC1
TAF1D
SLC2A1
INTS9
PSMG4
DARS
OLFR38
LSM11
FNTB
REV3L
BPIFB6
CCDC115
ZFP711
ERF
IMMT
TUBG1
UTP23
UBA2
DHX38
RBM19
ARCN1
RAC1
RPL38
UBR4
RPL10
TUFM
TRAPPC3
CKS1BRT
ITGB3
PPP4C
U2AF2
NOL6
MIS12
FNTA
ACTR3
SEPHS2
NUP160
BCL2L1
GCNT7
BEST2
RPL23
PPP6C
GSPT1
SHOC2
TMED10
UQCC1
CTDNEP1
PIK3R4
POLR3C
SNRPB2
STRAP
NAA25
NUP107
WDR5
SDE2
CENPN
GM14345
CNOT3
MRPL23
HNRNPK
PPP2CA
RPS9
SMN1
NOC3L
ANAPC11
ELAC2
ERAL1
NUFIP1
BECN1
ACVR1
ELP2
RRP36
MFAP1A
EIF2B5
I830077J02RIK
DTYMK
CNOT11
SLC35B2
SIRPB1B
REX2
CABP7
RAPH1
GCC2
PARG
COG2
YAE1D1
MRTO4
PPP1R10
DCLRE1B
SPRTN
DDX11
TRAPPC8
FOXA1
BRK1
PBP2
RPA1
HSPE1
IZUMO1R
RARS
ACTR10
MAK16
SNRNP35
CACNA2D4
SNAPC1
MRPS34
IMP3
EPRS
LTA
TRRAP
PDCD2L
CLDN20
EEF1E1
RPL23A
RPL19
SMPD4
POLR1E
HIST1H4N
MSTO1
DDX10
TXN1
KIF20A
MCM4
LDLRAD1
TMEM173
PGK1
RAD50
MAPKAP1
INPP5A
MTOR
CCT5
THOC3
SRP9
DHX37
WDR70
NOL12
PCDHB17
EIF2B1
MCMBP
TGIF2
EMC3
TFRC
EXOSC10
GM5741
TTC4
COG4
PRPF4
MNT
EHD1
HIST1H2AC
CEP192
ASCL5
GINS2
VPS4B
LMBR1
ST6GALNAC2
CENPJ
NSL1
AARS
SOS1
ARF1
KRR1
HS3ST1
2410131K14RIK
GRWD1
INTS6
SRBD1
TXNIP
UBA3
DAD1
RNASEH2A
HECTD1
ZSCAN12
ALG8
1110008L16RIK
FOXK2
XYLT2
RAB31
AP2M1
B3GAT3
SNRNP200
RPL36AL
TPRKB
TEFM
MRPL53
ID1
ELP5
MBD2
HIST1H2AE
GAPDH
WDR24
VMN1R143
MRPL44
RECQL4
GRCC10
IMPDH2
PKN2
USO1
MRPL14
LRR1
HNF1B
ATP2A2
PPIL2
EIF2S1
NCAPH
ERCC6L
PDAP1
GAR1
MTX3
RHOX4E
ALG14
KANSL2
UBR5
PPP1R15B
OPA1
CAP1
COX6C
LSM6
VPS18
GM6460
PTBP1
GPR89
SLC43A2
LY6A
LCE1C
PCBD1
MSN
CIAO1
NUP88
RTEL1
DDX27
PRIM1
1810026J23RIK
PHAX
H2-M1
CCDC130
MGAT1
GCLC
PCYT1A
HIST1H1D
TRIM39
ZYG11B
DPH5
SERPINA1F
PMPCB
ECT2
GEMIN8
SRP72
TIMM22
GM3259
MRPL46
SLC5A2
MRPL54
DNAJC27
SCD1
PRELID1
TRMT112
VMN1R138
SEC61A1
FAM183B
RPF2
LEMD2
SGPP2
GPAA1
MBOAT1
QRICH1
COG6
ESF1
VMN1R183
RPP21
PPAP2C
CDK1
MED22
MED11
SLC3A2
CCNG2
GNA11
ATL2
RCBTB1
MIOS
BCCIP
SARS
PAXIP1
TTC1
GOSR1
FAM189B
KRT4
HTT
NELFCD
RPS21
RPS3
WIPF2
DIS3
KRI1
GM1045
MRPL10
SAMD1
UQCRC1
EIF3H
KLF5
MRPS17
RHEB
CLEC7A
1700012P22RIK
RBM17
KRTAP4-9
NOP16
GM10662
SMAD7
TBC1D5
GPI1
PFDN6
NPY
THG1L
BIRC5
BRF2
MDN1
NIP7
MED4
RPTOR
2310011J03RIK
WDR59
BTG1-PS2
ULK2
KMT2D
NOTCH2
HTR3A
PCID2
TUBGCP2
SAMM50
LY6C2
UBE2J2
TRAF3
GM4303
ELP6
SPSB4
SRRD
KIF23
ZFP459
ORC6
VARS
C130026I21RIK
TRNAU1AP
TRIAP1
RPL6
AQP4
CCT8
CYP2J5
UTP18
ARMC5
AU019823
GM21671
TOP2A
GTF2H1
ATP5B
RBBP8
TBCB
GM3558
OLFR906
STAMBPL1
AMOTL1
ADCY1
MMP21
DCP2
TCP1
CXXC1
ITGB8
E4F1
GATB
ATP6V1G1
NINJ2
MRPL22
PMEPA1
VMN1R9
GLRX5
GTF2A1
EXOSC9
THOC1
TMEM209
GM14346
GM4302
BPTF
WRAP53
ADNP
VPS13A
SRSF6
POLR2E
NAT1
NDUFA1
CHD4
NOP56
DNAJC2
U2AF1
ALG2
PHB2
RNPC3
DPH2
RPAP2
VPS45
IL6ST
RCL1
MED8
ZRSR2
EXOC8
PCNA
PPP2R3C
GM5795
SKIV2L2
CEACAM9
LIN28B
AKR1C6
IRGQ
DDX47
HUS1
OLFR969
LY6G5C
GM11237
KPNA1
MYH9
PMF1
D19BWG1357E
CLSTN1
TSG101
OLFR1381
VMN2R42
OVGP1
ATP5A1
SMG5
ANKLE2
44806
WDR7
HEATR1
ATP5S
POLE2
CAPRIN1
FKBP9
CCNA2
BMS1
HIST1H3B
WDR53
RPL24
IQCE
PACSIN3
ACTR8
ANO5
LETM1
SLC35E4
ARHGAP27
ANXA11
ADSL
TBCD
MON2
INPP5K
CUL9
PCDHA5
SUGT1
TADA2A
CCDC53
UBE2T
LMNTD2
COMMD8
PPWD1
UBE2DNL2
PDCD11
ATP9B
PPM1G
PGAM1
DDX1
FGF5
ME3
SKP1A
METAP2
VMN1R122
VCP
VMN1R158
RPP38
RPS19BP1
MRPL2
DLX6
SMC5
TFAP2B
GM8693
SRSF2
ACSL4
DHPS
COA5
BTF3
SFRP2
CLTC
ZIM1
MCM10
NUFIP2
RFC2
GM20604
BIVM
TMEM42
PALM
OXSM
CYTH4
RUVBL1
OLFR1131
DUSP12
FLAD1
MYRF
PARK2
MAPK10
CTRB1
GPX4
YES1
ANAPC5
FARS2
AFG3L2
SPTLC1
CLDN15
GM15284
PSMA1
HSPA9
THOC6
CHMP7
FANCD2
DMAP1
VMN2R17
VMN2R44
ST7L
BNIP1
FDXR
GM10220
NAP1L2
OLFR1370
PRKRIP1
METAP1
GUK1
SETD1A
FCHO2
TAZ
UBE2L3
ADCYAP1
ASNS
USP4
DEB1
COX17
LONP1
MCL1
OLFR1474
SELK
NMT1
HEMT1
AKT1
GFM2

## Sheet: 3D positive
TSC1
METTL3
NF2
METTL14
CTNNA1
FBXW7
INPPL1
TSC2
TRP53
SOX4
DRAP1
PTPN12
CASP3
CASP9
RWDD1
GNA13
DNASE1L2
VGLL4
DAPK3
DR1
CBFB
TGFBR1
RCOR1
CTSL
MYL6
WAC
SETD5
ZEB1
ARHGEF3
VMN2R16
PIK3CA
LYZL1
CHRAC1
RAD51AP2
PALM3
TEAD3
DDX46
HMG20A
FOXJ3
BRD7
DDIT4
RHBG
LCE3E
NKX3-2
AIMP1
OLFR1278
KCTD5
RAB40C
WTAP
OLFR1489
