# Supplementary material for: The context-dependent epigenetic and organogenesis programs determine 3D vs. 2D cellular fitness of MYC-driven murine liver cancer cells
Source: eLife. 2025 May 6;14:RP101299. doi: 10.7554/eLife.101299 (PMC12055005; doi:10.7554/eLife.101299)
Supplement: Supplementary file 11. [file elife-101299-supp11.xlsx]

## Sheet: Negative and DEG
Names	total	elements
3D_DEG 3D_Neg Hypoxia_DEG Hypoxia_Neg Normoxia_Neg	73	ORC1
		SF3B6
		EMC8
		MAD2L1
		VMP1
		GEMIN6
		OIP5
		VCP
		SRSF3
		CTDP1
		SMARCA4
		PRPF8
		TIMM23
		RAD50
		MAGOH
		PSMA6
		NARS
		PSMA1
		DPH3
		PAFAH1B1
		COPA
		SMC1A
		NAA20
		MED11
		RBX1
		CINP
		DIMT1
		EEF2
		NUBP1
		LYRM4
		CKAP5
		GTF3C1
		TRUB2
		ALDH18A1
		DYNC1H1
		FXN
		RPP14
		FNTB
		LRR1
		EXOSC3
		AP2B1
		DNA2
		SLC7A11
		UXT
		ANAPC10
		SKP1A
		GFPT1
		SRSF7
		ROMO1
		DTYMK
		HIST1H2BK
		PHB
		GINS2
		SPC24
		PSMA3
		ACTL6A
		MIS18A
		CLP1
		ACTR6
		TARS
		CLTC
		RAN
		RPF2
		PSMA4
		NIP7
		PRIM1
		DNMT1
		POLE2
		EIF3C
		DDX54
		PRPF38A
		PKM
		ORC6
3D_DEG Hypoxia_DEG Hypoxia_Neg Normoxia_Neg	43	PNPT1
		LONP1
		PPIL1
		MRPL15
		MRPL57
		MRPL22
		DHX38
		MSMO1
		SUPT6
		GPI1
		SKA1
		PTBP1
		PSMA2
		ASNS
		KPNB1
		SSBP1
		PCYT2
		GINS1
		FAM98B
		DHFR
		ATP1A1
		COX7B
		NARFL
		DHRS7B
		ARGLU1
		VPS29
		EIF3A
		IARS
		RFC1
		NSMCE1
		SNRNP200
		GAPDH
		SCD2
		LSM10
		ITGAV
		EPRS
		TINF2
		NXT1
		PSMD14
		LSM7
		CCDC84
		MTG2
		SYMPK
3D_DEG 3D_Neg Hypoxia_DEG Normoxia_Neg	10	CDK7
		CENPK
		MRPS7
		UBA3
		RCL1
		GCN1L1
		RFC3
		PSMG3
		TMEM199
		TRMU
3D_DEG 3D_Neg Hypoxia_DEG Hypoxia_Neg	19	CEP350
		OSBP
		ERH
		PUS3
		MED21
		MED31
		RAB10
		RPP38
		CAND1
		POLR1E
		PPP1R12A
		SEC13
		NUF2
		COPS3
		GUK1
		HGS
		ILF2
		MRPS22
		NOL6
3D_Neg Hypoxia_DEG Hypoxia_Neg Normoxia_Neg	104	GNL3
		RPL19
		PSMG4
		COPS4
		INTS1
		POLR2J
		ATR
		BTF3
		OSGEP
		RPS21
		CCT4
		ARFRP1
		FAU
		PSTK
		LAMTOR3
		EIF2S1
		POLR1A
		HSCB
		RPL39
		RABGGTB
		PSMA5
		HIST1H2BP
		RPP30
		RPS10
		FCF1
		CENPW
		RPL3
		RPL9
		RPL35A
		EIF3I
		USP8
		POLR1C
		RPS23
		RPS27RT
		RPL12
		PSMB6
		LARS
		EMG1
		RPS13
		CENPA
		RFC4
		SRP19
		HIST1H4N
		RPL26
		TIMM10
		RPL5
		LSM5
		RPS15A
		SMU1
		POLR1D
		CDC16
		ACTB
		PAICS
		PAM16
		AARS
		POLR2G
		UTP20
		HSD17B10
		RPS5
		RPL35
		MRPL52
		EIF3M
		RPL32
		TPT1
		NOP10
		NACA
		KAT8
		SNRPG
		BMS1
		RPL24
		RPLP0
		EXT1
		RPS6
		RPL34
		SNRNP25
		PSMB4
		HSPE1
		RPL37A
		RPL11
		RPS25
		POLR2E
		RPS9
		SOS1
		ADAT2
		TSEN15
		RPS3
		RPSA
		SNRPE
		WARS
		SNRPD1
		PFDN5
		SRP9
		MED30
		RPL36
		TBCA
		EEF1E1
		ATP6V1G1
		PPP2R3C
		SPCS2
		PSMB1
		CLNS1A
		RPS14
		CCDC115
		RPS27
3D_DEG 3D_Neg Hypoxia_Neg Normoxia_Neg	138	CHORDC1
		TUBB5
		UBA1
		SSU72
		EXOSC7
		ZNHIT2
		SRP72
		SARS
		ZFP335
		MAK16
		NOP58
		RPL4
		POLD2
		RTEL1
		CHMP6
		ZBTB8OS
		CDS2
		TUFM
		SF3B5
		POP4
		SEC61A1
		WDR70
		TELO2
		ZPR1
		RFT1
		CDT1
		ATP6V0C
		PSMD6
		RPL18A
		CCT3
		HIST1H3C
		KANSL3
		TARDBP
		METAP2
		POLR2A
		TAF1C
		GTF2E2
		RPL23A
		POLD1
		POLR3F
		WRB
		USP39
		SCAP
		RFC5
		DDX56
		WDR73
		SDHA
		MMS19
		QARS
		ATP6V0D1
		NUBP2
		SFPQ
		NUP93
		RPL7L1
		PPP1R8
		TRMT112
		CCT2
		LSG1
		PDCD7
		PDRG1
		MOCS3
		GGPS1
		PCID2
		EIF3F
		DKC1
		RPL30
		PTAR1
		GMPPB
		SEPSECS
		HSPA9
		NCBP2
		TOP2A
		FEN1
		GPN1
		PRELID1
		RGP1
		WDR18
		MARS
		LARS2
		GTF2H3
		SKA2
		IMP4
		POLR3K
		RIOK1
		TRA2B
		EXOSC2
		HYOU1
		ZMAT5
		LSM12
		WDR12
		MFAP1A
		KCTD10
		PGAM1
		RARS2
		HYPK
		WBP11
		ATP6V1A
		IK
		SF3B2
		PYROXD1
		RCC1
		SF3A1
		MRPL55
		TUBA1C
		SNRNP35
		TXNL4B
		HIST1H2AN
		KDSR
		NUDT21
		TRMT61A
		RAC1
		SLC39A7
		HIST1H2AE
		HIST1H3B
		RPA2
		DHX33
		RPS2
		PRPF6
		PSMB2
		PCNA
		NDOR1
		ALDOA
		MTPAP
		DDX55
		OGT
		LSM11
		HIST1H3H
		LSM6
		CPSF1
		SRSF1
		PPIL2
		ADSL
		CCNH
		POLR3H
		RPL23
		ATP6V1D
		DBR1
		MAT2A
3D_DEG Hypoxia_DEG Normoxia_Neg	29	HAUS2
		DPY30
		DNAJC9
		HAUS1
		MRPL20
		CDC26
		H2AFZ
		POMP
		IDI1
		IGF1R
		PABPC1
		POP5
		CHCHD4
		SPTSSA
		MOB4
		SLC2A1
		EIF5B
		GTF2A2
		DHX8
		OXSM
		TRNT1
		ORC4
		SUB1
		THOC1
		BLOC1S1
		ENY2
		GEMIN7
		ZNHIT3
		NUMA1
3D_DEG Hypoxia_DEG Hypoxia_Neg	20	ANKRD49
		TYMS
		ISCA2
		MRPL28
		UBR5
		CDC7
		HIST1H4C
		NPC1
		ZFP574
		IFT74
		PPIH
		WDR7
		ACTG1
		GEMIN8
		TEFM
		MRPS17
		MRPL17
		FOXK1
		SLC7A5
		RPAIN
3D_DEG 3D_Neg Hypoxia_DEG	22	GRPEL1
		TNPO1
		TTC14
		DYNLT1F
		TMEM208
		MRPL19
		PI4KA
		SLC35B2
		OSTC
		GINS4
		CHD4
		GM10767
		INPP5A
		TLN1
		SPPL3
		ANAPC1
		HYLS1
		SETD2
		ASCC3
		CAD
		GBF1
		PSMD13
Hypoxia_DEG Hypoxia_Neg Normoxia_Neg	34	RPS17
		PMVK
		RPL31
		RPS16
		RPL10A
		ATP6V0B
		PSMC6
		RPS12
		PSMA7
		RPS19
		DDX3X
		URM1
		RPL17
		PAK1IP1
		TXN1
		RPS24
		DNM2
		CENPP
		SUPT4A
		RPL36A
		PTPN11
		POLR2I
		RPS27A
		RPS8
		RBBP4
		EEF1A1
		RPS15
		TRRAP
		RPL27A
		POLR2H
		PDCD11
		RPS7
		ATP2A2
		SNRPD2
3D_Neg Hypoxia_DEG Normoxia_Neg	11	GPX4
		ATP6V1F
		TTC4
		TRIAP1
		MRPL18
		MIPEP
		GEMIN2
		RPL7
		DROSHA
		PDCD2
		DNAJC13
3D_Neg Hypoxia_DEG Hypoxia_Neg	7	RPS18
		MRPL14
		PSMB5
		PRKRA
		ARID2
		FH1
		TAF1B
3D_DEG Hypoxia_Neg Normoxia_Neg	79	RBM17
		EMC1
		HIST1H2BJ
		STRIP1
		OXA1L
		TRAIP
		WDR92
		EGFR
		RPL28
		SNAPC5
		PRDM10
		SLC3A2
		INTS2
		HIST1H2AB
		SNAPC2
		MIS12
		HIST1H3D
		CIAPIN1
		RPN2
		MARS2
		NARS2
		PGRMC2
		CSTF3
		EXOSC10
		DCLRE1B
		HIST1H2BN
		CWF19L1
		N6AMT1
		HIST1H3G
		ELP3
		UTP23
		SEH1L
		ATP6V1B2
		GTPBP4
		GM20604
		RRM2
		FAM32A
		CDC123
		TBCD
		SEPHS2
		TOE1
		HIST1H3F
		TBL3
		SMC3
		GTF2H2
		CDC6
		MIS18BP1
		MOGS
		TIPIN
		DNAJC11
		SREBF2
		ZWINT
		HIST1H2AG
		PARS2
		YAE1D1
		PRPF31
		WDR77
		GTF2B
		NUP205
		SNAPC3
		POLA2
		SRP54B
		COPG1
		RPS4X
		ZW10
		MTOR
		AP2M1
		SNAPC4
		RPS26
		NXF1
		TFRC
		JUNB
		RAD51
		SNRPD3
		CENPC1
		HIST1H3A
		NMD3
		AMD1
		NDRG3
3D_DEG 3D_Neg Normoxia_Neg	14	TRMT6
		NUP85
		MCAT
		HMGB1
		DOLK
		POLR3E
		PREB
		NOP14
		VARS
		MRPS25
		RRP15
		CENPH
		FAF2
		ARPC2
3D_DEG 3D_Neg Hypoxia_Neg	18	DDB1
		SUPT5
		PTPN23
		HAUS3
		HNRNPU
		USP16
		MED8
		ILK
		NIPBL
		PSMC4
		MED7
		NPLOC4
		CDK11B
		ARNT
		TBP
		HAUS8
		PPP2R1A
		VPS18
3D_Neg Hypoxia_Neg Normoxia_Neg	333	TUT1
		XAB2
		DDX5
		MMS22L
		RRP7A
		RPL7A
		RABGGTA
		CIAO1
		D2WSU81E
		ALG2
		HSPD1
		CDK1
		POLR2B
		RPS28
		GPN2
		TONSL
		TAF12
		PWP2
		LSM4
		SNAPC1
		DDX49
		DOHH
		VPS25
		ANKLE2
		SF3A3
		EIF4A3
		RTCB
		NRF1
		PARG
		HUS1
		POLRMT
		PHB2
		TCP1
		RPN1
		EIF3D
		ISCU
		RPS29
		EIF5A
		PLRG1
		SLMO2
		SLC35B1
		ACLY
		MCM5
		METTL16
		KAT5
		2410131K14RIK
		TOMM22
		RUVBL2
		RPLP2
		SPNS1
		RPAP1
		BANF1
		PES1
		PABPN1
		INTS7
		NUTF2
		GM8693
		POLR3A
		PRMT5
		PSMB7
		POLR1B
		SOD1
		WDR74
		SKIV2L2
		FARSA
		TXNRD1
		CWC22
		PPP1CB
		HIST1H2AC
		MCM2
		CDAN1
		MCM4
		DCAF13
		PWP1
		KTI12
		CDC37
		PPP2CA
		CIRH1A
		POLE
		ASH2L
		TAF8
		WARS2
		HMGCS1
		HAUS7
		TERF1
		VMN2R40
		WDR3
		ALG1
		RPL38
		RPL14
		GEMIN5
		DDX20
		ACTR2
		ESPL1
		ACTR3
		ORC3
		RAE1
		EIF6
		POLR2L
		TUBGCP3
		POLG2
		SUPT16
		MCRS1
		DDOST
		DDX27
		THAP11
		GM10406
		UBE2I
		CHEK1
		MBTPS1
		DHDDS
		INTS8
		SNRPF
		MFAP1B
		RBM19
		EXOSC9
		NHP2
		CPSF3
		GPKOW
		EXOC8
		WDR36
		GTF2H4
		CSE1L
		DHX37
		CENPN
		GART
		RPL6
		VARS2
		DYNLRB1
		HIST1H2AI
		EXOSC8
		HEATR1
		HNRNPC
		SF1
		MRPL43
		NAPA
		PPP1R2
		DEB1
		ANAPC11
		CDK9
		ANAPC2
		SNRPA1
		EIF5
		DHPS
		TNPO3
		NUP160
		44811
		XPO1
		SACM1L
		RBM22
		TUBG1
		KRR1
		USB1
		DUT
		RPL13
		RRP12
		DMAP1
		WDR5
		CHAF1B
		HSD17B12
		POLR2C
		CPSF4
		RARS
		YKT6
		DPAGT1
		HNRNPL
		PGD
		E2F3
		GOLT1B
		VRK1
		PISD
		CENPM
		RANGAP1
		BYSL
		VMN1R149
		PMPCA
		CSTF1
		ARL2
		YEATS4
		PUF60
		DARS
		DAD1
		SDAD1
		OGDH
		HIST1H2AP
		BIRC5
		LAMTOR2
		BOP1
		USP7
		GM4836
		WBSCR22
		RACGAP1
		CCT8
		LIN52
		ARIH1
		HSPA8
		CARS
		NOC3L
		PRIM2
		RPL10
		SPCS3
		GRWD1
		RAD1
		HARS
		CRCP
		NHP2L1
		EIF2B2
		CSNK2B
		NELFCD
		TRAPPC5
		EAF1
		POP7
		TXNL4A
		ATP6V1E1
		ORC5
		RNPC3
		TTC27
		ABT1
		MSTO1
		ECT2
		CCT7
		BUB3
		COPS6
		HIST1H2AO
		EIF2B4
		NHLRC2
		POLR2F
		MCM7
		4930467E23RIK
		UTP6
		PMPCB
		ARPC4
		PSMD4
		NFS1
		NUP107
		TIMELESS
		DDX10
		PPP6C
		EXOSC4
		FNTA
		USP36
		IGBP1
		GM5148
		LSM2
		HINFP
		RPL8
		RBM39
		IMP3
		BC061237
		PSMB3
		EIF1AD
		NLE1
		TRAPPC3
		POLD3
		ARCN1
		NOL10
		SF3B3
		ACSL4
		FAM50A
		SUPV3L1
		MED20
		FARSB
		9030624G23RIK
		RSL24D1
		DDX47
		PRPF19
		EIF2B3
		SMARCB1
		CPSF3L
		NOP2
		RAD9A
		TAF2
		EEFSEC
		RRP9
		MYBL2
		CENPO
		BRF1
		MCM3
		VMN1R128
		SF3A2
		NSL1
		SNUPN
		NELFB
		RPS3A1
		POLR3C
		DYNC1I2
		CSNK1A1
		EXOSC5
		DCTN6
		KARS
		ETF1
		INTS3
		PHF5A
		THOC3
		NSF
		RPL21
		AAMP
		EIF4A1
		SAP18
		VMN1R183
		HSPA5
		SYS1
		HIST1H2AK
		INTS9
		PFDN6
		RPA1
		ESF1
		UBA52
		NCBP1
		MRPS27
		ADAT3
		RRM1
		NEDD8
		BC052040
		GM14632
		BCCIP
		DDX23
		TRAPPC4
		CCT5
		FDXR
		SNRPB
		PFN1
		SF3B4
		PSMC3
		VMN1R143
		GMPS
		TTK
		DDX41
		PGM3
		RPL37
		ERCC2
		POLR3B
		TOP1
3D_DEG Hypoxia_DEG	1849
		CLMP
		CREB3L1
		ABCA3
		FARP1
		CMTR2
		TUBD1
		ZHX3
		APBB2
		GCSH
		ZFP182
		PFKP
		NAPRT
		ESYT1
		SUMO1
		TMC4
		UQCR11
		HIST1H4J
		CENPQ
		PBLD1
		COPRS
		KBTBD8
		ZEB1
		CHD9
		STK16
		SEMA4D
		PDLIM2
		IGSF3
		PPCS
		MED13L
		PTCD3
		NFIA
		TEAD1
		SORL1
		SLC25A14
		AL731706.1
		SERPINF1
		MAPKAPK2
		NMNAT1
		DIP2A
		FAM129C
		EFNB1
		TRIQK
		ROCK2
		SNX16
		BBS12
		RNF32
		COL1A1
		PRDM2
		TRAF5
		LTBP4
		STARD5
		DNAJC15
		TAFA2
		GM12166
		GM21985
		CCL9
		CHRAC1
		ALX1
		PODN
		ROR2
		ZBTB48
		TM4SF4
		BUD31
		CORO2A
		APOE
		ORM1
		HIST1H2AD
		F2RL1
		TRAPPC9
		BCL2
		KNG2
		EMILIN1
		NDUFS4
		COL18A1
		SEC1
		CELA1
		CDC42BPA
		CNOT1
		SPTBN1
		SPX
		PRR22
		IRS1
		IGSF11
		GM4724
		NCAM1
		FERMT3
		GLIS2
		KDM4B
		SPG20
		ZFP773
		GLG1
		GM20425
		EPHA4
		L2HGDH
		SELENOP
		ZBTB20
		SPACA6
		CENPX
		WASHC5
		COMMD5
		DCUN1D5
		ALDH1L2
		DOCK11
		SMTNL2
		CATIP
		BST1
		PIGF
		AHNAK
		IL18BP
		HEATR5B
		LPIN3
		AHR
		RBPMS
		VSIR
		ELFN1
		SORBS2
		AKR1C14
		KLF4
		IFITM10
		HP
		SLFN4
		IDS
		ATP7B
		RAB38
		OTOA
		MRPL41
		ATP23
		SOX9
		TNRC18
		JUND
		FETUB
		DCTN1
		GM12258
		NDUFB8
		R3HDM2
		PTCRA
		PREX2
		ZFP518B
		KLF2
		VMN1R43
		TANC2
		TFE3
		PGM1
		CPD
		SSMEM1
		DLGAP1
		NAB2
		H2-DMA
		LGR5
		TM9SF4
		GM12355
		AKAP2
		XAF1
		ZFP968
		RAB15
		PLA2G4C
		ZFP977
		EMC9
		THOC7
		CCDC162
		NF1
		EHD2
		GM14434
		AGER
		GABRE
		TRIM56
		ELF4
		PPCDC
		NT5E
		FAM129B
		NEURL3
		ZFP944
		MEX3D
		NUDT22
		GM14419
		MSS51
		FAM199X
		ECHDC3
		IL15RA
		ZFHX2
		YPEL1
		FBXL5
		JAGN1
		ITGB2
		HPRT
		EPB41L3
		TEKT2
		DDIT4L
		CSRNP1
		LAMA1
		SETBP1
		MME
		VAT1
		CAVIN2
		EEF2K
		ZFP991
		MYC
		1700029I15RIK
		DNASE1L1
		MRPS18C
		ARID1B
		EPN1
		SLC35A1
		GSK3B
		PIGT
		FOXO1
		DUSP10
		CCDC28A
		PKP2
		AMPD3
		PYURF
		9930012K11RIK
		SLIT1
		BLVRB
		GM14410
		MKKS
		CFAP74
		TRIM6
		CD109
		2010315B03RIK
		ADAMTS12
		ARHGAP8
		ATG4A
		TBC1D16
		SLC25A30
		PLXNA4
		ASPN
		VNN3
		ARHGDIB
		ITGA10
		STK24
		ZFP951
		BOD1L
		GM14393
		MRM2
		METTL18
		CCDC103
		ZFP626
		AI467606
		RMND5A
		EXOC3L4
		IMPG2
		ZDHHC1
		LRRC32
		ZFP300
		F13A1
		KRT80
		PIK3C2B
		AKR1C13
		HACL1
		CTNNA1
		CNTD1
		NDUFB7
		FOXN3
		AGRN
		GOLGB1
		KRTCAP3
		CHD7
		CLIC4
		LRP1
		BIRC6
		ADHFE1
		PTBP3
		CDON
		SERPINI1
		HDHD3
		SNX18
		RAB2B
		NDRG1
		MRPL13
		MRPL46
		AFAP1
		CDK13
		PACS1
		MSRB2
		BCR
		CAPN2
		LRFN1
		RMDN1
		2210408I21RIK
		NEO1
		GLT8D1
		DBI
		2310022B05RIK
		GUCY1B2
		APOOL
		RNF152
		FAHD2A
		ZFP961
		PALMD
		SH3D21
		SKI
		CCDC17
		TBL1XR1
		KRT16
		UBE2O
		TMEM126A
		FBLN2
		CPEB4
		VMN2R29
		CAMSAP2
		GM3636
		ABL1
		PTPRG
		NCOR1
		PAKAP
		BRDT
		UBE2H
		CCNE2
		TBX3
		TAZ
		ZFP719
		ERBIN
		GIMAP9
		MTHFD1L
		PSMD10
		APLN
		GUF1
		NCOA1
		CD1D1
		WDR27
		ZBTB10
		BHLHE40
		MCC
		ATP2B4
		RAB22A
		PTPN6
		BAHD1
		PLXNB2
		GAS2
		CCDC85C
		MAP3K4
		KNG1
		UNC50
		RUNX2
		SDC3
		GM4841
		PTGES2
		SLC35G2
		LBHD1
		VCAN
		MED12L
		ARG2
		LEKR1
		FBXL16
		ADAM8
		MAN2B2
		TOMM5
		GM17655
		ALKBH5
		JUP
		CHP1
		MAMDC4
		FAM124A
		ACAP2
		KIF3A
		PTGFRN
		NBL1
		MROH3
		RAB11FIP5
		CLEC2D
		CUL7
		SLC6A12
		PATJ
		MGAT3
		ZFP516
		SIM2
		HELZ
		SLC46A3
		TET1
		PTRH2
		CENPI
		SARNP
		SH3RF1
		FNDC3B
		MTCP1
		METTL7A1
		LMCD1
		GM35315
		SWI5
		CAV2
		ATRNL1
		NDUFB2
		OVOL1
		ASF1A
		HARS2
		DCHS1
		SYCE2
		ADNP
		PDCD1LG2
		GM14327
		LY9
		ZFP870
		ZBTB7B
		SDF2L1
		ANO3
		CNTNAP5A
		T2
		COL11A1
		HIST1H1D
		UBAP2
		CDKN2AIPNL
		ACTN1
		CYB5A
		BBIP1
		N4BP2L1
		ZFP455
		DENND6B
		CAR8
		DOCK7
		TPR
		HIST1H4A
		KRBA1
		MYO1D
		BMP2K
		SAMD4B
		WNT7B
		R3HDML
		CHCHD2
		FLT4
		FKBP11
		SLC4A4
		FLII
		ZFP958
		AP2A2
		SMAP2
		MAP7D1
		RMND1
		UBR4
		RNASE4
		RRAGB
		COL12A1
		RYBP
		ABCA13
		HDLBP
		DOC2G
		ARL6
		HECW1
		1700109H08RIK
		SOAT2
		RAP1GDS1
		LZTS2
		CCDC51
		QK
		BAIAP2L1
		GMPR2
		ATOX1
		ARHGEF10L
		KANK1
		MAP4
		KIF26B
		LPP
		HIVEP1
		DFFB
		CTLA2A
		MACF1
		SEC24D
		TGFB2
		CHRDL1
		ADD3
		MBNL2
		ADGRB2
		TRIO
		RENBP
		CLHC1
		SMARCC1
		HIST2H4
		DNASE2A
		ZFP820
		DSP
		NDST1
		TPD52L2
		PTPRE
		UNC5B
		FAM20A
		SOX4
		FBXW8
		GM49396
		ZFP106
		TPP2
		JAM3
		GPNMB
		TCIM
		CRYZL1
		MECP2
		DIP2C
		PDLIM7
		TIMP3
		HRK
		NFATC1
		SMAD3
		DGKH
		ZFP386
		PLCG1
		NEDD4
		C330018D20RIK
		KRT13
		USP17LB
		THYN1
		MAGEE1
		CTIF
		TBC1D5
		GM4787
		MYO6
		ZFP930
		TMEM223
		MRPL33
		E130308A19RIK
		GM2237
		4930522L14RIK
		HBEGF
		MRPL12
		COMMD2
		WIZ
		DDAH1
		CRYAB
		LY6G
		LRRC58
		ARFGEF3
		PARVA
		PTHLH
		PRKG2
		SH3GLB1
		GNG10
		44449
		CTSW
		HDDC3
		NIPSNAP1
		CHD3
		HMCN1
		ZFAND4
		RNF145
		EFCAB7
		CLDN2
		PRDX1
		SIRT4
		ARHGAP4
		RSKR
		OVGP1
		OLFR1369-PS1
		WDR5B
		AEBP2
		CBR4
		CCL7
		NDUFB4
		BCL9L
		ZFP708
		0610009B22RIK
		1110059G10RIK
		SHCBP1L
		CROT
		RDH5
		EFNB3
		PROKR1
		MSI1
		LLGL1
		DYRK2
		PCNX
		HUWE1
		SMIM8
		ZFP395
		LEF1
		RNF225
		GM28710
		ANXA6
		ABTB2
		AP2A1
		ORM3
		COL6A2
		RAPGEF1
		P2RX6
		CCDC32
		STC1
		KLHDC8B
		FMC1
		EGR2
		FRMD6
		GM45062
		FKBP10
		VLDLR
		LARP1
		ITGB6
		VIM
		SAMD8
		44264
		ABCC3
		SAMD9L
		EGLN1
		RWDD3
		D930048N14RIK
		GM14391
		STAT3
		SYNJ2
		FAM83E
		MBD4
		GID4
		ARSB
		3110001I22RIK
		MPP2
		TNK2
		DENND4A
		NDUFA4
		GM14308
		ANKRD11
		PLPPR3
		NT5DC3
		CSTAD
		ZFP943
		LY6A
		ZFP85
		CHCHD1
		HK1
		SFMBT2
		UACA
		TNKS
		SLC35G1
		GM10131
		CRLF1
		PYCR1
		H2-M3
		PRRC2C
		TRMT13
		ARRB1
		LRRC15
		DCAF7
		MCAM
		PCDHGB2
		AQR
		MAP7D2
		GM28042
		CLMN
		TNS1
		TOM1
		MRPL50
		44448
		PRUNE2
		ATG13
		SLC35B3
		ZFP729B
		NFIC
		QPCT
		SUN2
		UBE2B
		CCDC30
		TAGAP1
		GM10778
		PLOD3
		DRG1
		UROS
		GM37240
		LEMD3
		PRXL2A
		MGMT
		PIEZO1
		SPAG4
		LASP1
		ARHGAP23
		INSYN1
		ATG9B
		6430550D23RIK
		ERG28
		AW209491
		BC024063
		SEC31A
		GLRA3
		VPS8
		TMEM94
		CXCL15
		INAFM2
		DHRS9
		TGDS
		CASP3
		ZFP236
		HSD3B7
		XPR1
		ZFP609
		GM4767
		AGO1
		RGS2
		CREB3L2
		COL3A1
		GLIS1
		GTPBP8
		ARHGEF11
		UHRF1BP1
		DPT
		DUSP19
		RGS5
		FOSL2
		GRB10
		CLSTN1
		P4HA2
		MOV10
		EDIL3
		NPFF
		AOPEP
		SLU7
		RCCD1
		GM20518
		ZFP975
		KLHL33
		PLCG2
		CDYL2
		PTGDS
		MRPL3
		BMPR2
		KLF7
		TIMM9
		LGMN
		ZFP456
		HIVEP2
		PYGL
		MTA3
		TAF13
		SHLD1
		FAM136A
		NFIX
		DIP2B
		BCORL1
		LY75
		PRORSD1
		DNMBP
		SP1
		APOBEC1
		PPME1
		HCN2
		EFHB
		CKLF
		ORMDL2
		SYK
		GGT7
		KIFC2
		GDPD3
		PTPN21
		IQGAP1
		MYCBP2
		ZFP964
		WIPI1
		TMCO4
		FDXACB1
		SPOCK2
		RNF144B
		GM5141
		HTATIP2
		PAMR1
		PABPC4
		DDX6
		GM3448
		NTN1
		ZFP938
		AKAP9
		ADAM1A
		CAV1
		PCM1
		RNASEL
		AEBP1
		ELOF1
		GM2115
		MSI2
		PLEC
		NCAPD2
		ANK1
		DCP2
		GIN1
		C1D
		EPM2A
		SPNS3
		ZFP804A
		MXD3
		MON2
		H2-AB1
		UBE4B
		GM49391
		IKBKE
		GM32687
		BEX1
		COMMD3
		WNK3
		KIF18A
		SLC41A2
		KHSRP
		1700092M07RIK
		KCNIP4
		CAMK1D
		RTP4
		FLRT2
		NFATC2
		NAT8F1
		SLC39A2
		ERF
		GCNT4
		1110012L19RIK
		OTOGL
		CYREN
		ZFAND3
		ZSWIM5
		IFI35
		TLR4
		DIPK1C
		DNASE1L2
		HIST4H4
		GBP3
		TMEM128
		DPEP2
		MBIP
		TSPAN6
		MPP3
		SMG6
		MSLN
		MARK4
		CBY1
		CIB1
		1500011B03RIK
		IFI204
		AMOTL1
		ABRAXAS1
		TOMM40L
		ZFP362
		CHD5
		CACYBP
		JAK1
		TEDDM3
		ITGA9
		ACSL6
		QSER1
		KCNB1
		HIPK2
		MTRF1
		CASC1
		COL6A3
		USP22
		TMEM126B
		ZFHX3
		HEMK1
		ZFP273
		EFNA3
		CUX1
		SMIM15
		MTERF1A
		AIM2
		KYAT3
		SLFN5
		MTERF1B
		COL6A1
		FOXD1
		AMT
		A630023A22RIK
		RASL11A
		RLIM
		KCTD12
		UBE2V2
		BOLA1
		COL5A1
		SFT2D1
		ADAM22
		CFP
		CNIH3
		MAP4K4
		PAQR9
		THSD4
		KIF21B
		LMNA
		PEG10
		FOXO3
		GNGT2
		IFT20
		GPC6
		PLA2G4B
		DNAJC24
		WNK1
		GSDMD
		AHNAK2
		CARMIL2
		MFHAS1
		GM8113
		HAS1
		ACOX2
		COA3
		LHX2
		CSF1R
		NOTCH3
		PTH1R
		RBP1
		ESPN
		RBM43
		CRKL
		ZFP57
		TENT5A
		CDKN3
		MPG
		GM4951
		GABRA3
		SH2D5
		ADCY9
		WHRN
		GOLGA4
		3110082I17RIK
		BC028528
		MIB1
		SUSD1
		MTERF2
		NPTXR
		DPYSL3
		GPC1
		PAK2
		APP
		ZFP652
		WASF2
		CDK10
		HLX
		6720489N17RIK
		CBR1
		ITPR3
		ZFP953
		APBA1
		ACTN4
		PLCE1
		INSL3
		TNIP3
		PIGX
		ZFP874B
		CNBP
		PDF
		AHDC1
		TMEM151A
		ITPK1
		TMEM139
		PAK1
		ZFP867
		C1RL
		B9D1
		GYS1
		ZFP760
		PADI1
		SH3BP4
		PON3
		USP47
		TRIM33
		IZUMO4
		ATG4A-PS
		FGFR1
		GM20683
		SPN
		BBC3
		BET1L
		FRY
		2210418O10RIK
		TANGO2
		SAAL1
		HERC2
		GM45871
		LIMS2
		UTRN
		CNN1
		PALLD
		RWDD2A
		ZFP965
		TENM4
		ASB13
		ZFP14
		2610008E11RIK
		CCN4
		PPP3CA
		DDB2
		TSPAN13
		GM49405
		DYSF
		GOLGA3
		DHRS7
		HIST2H2BB
		ITGB1BP2
		CEP170
		TPI1
		DNAJC5
		HECTD2
		C3
		MAPK12
		RNF217
		DNM1
		DYNLT1C
		ATOH8
		KBTBD3
		NFKB2
		SLC7A3
		NUP37
		PATE14
		BARX2
		TASP1
		DDX39
		GUCA1B
		ATPSCKMT
		LDHB
		GM20605
		GMFG
		PRRC2B
		LTBP1
		SMAD9
		TRIP12
		MBD5
		ERO1L
		PSMC3IP
		RASSF5
		PCDHGA1
		EZR
		TMEM14C
		PALM2
		CLSTN2
		CALHM5
		POU6F1
		ZFP51
		NBR1
		PKHD1
		HIST1H1A
		DRAM2
		PIGP
		ADAMTS2
		PJA2
		MED12
		TLE2
		MGST1
		ZFP292
		SPG11
		GM6710
		ZFP661
		PCDHB18
		FN1
		PXMP2
		ASH1L
		SERTAD2
		UBQLN2
		NT5C3B
		HNRNPUL2
		GAA
		GNAO1
		GM3055
		AY074887
		PFKL
		MITD1
		ECE1
		FAM189B
		BMP6
		HPF1
		IFI203
		LAMB3
[truncated: 5,950 more rows]

## Sheet: Positive and DEG
Names	total	elements
3D_DEG 3D_Pos Hypoxia_DEG Hypoxia_Pos Normoxia_Pos	1	PTEN
3D_DEG 3D_Pos Hypoxia_DEG Normoxia_Pos	1	ROCK2
3D_Pos Hypoxia_DEG Hypoxia_Pos Normoxia_Pos	1	AMBRA1
3D_DEG Hypoxia_DEG Normoxia_Pos	7	EFNB1
		SOX9
		FAM124A
		SLC4A4
		LLGL1
		ZFP804A
		LMNA
3D_DEG Hypoxia_DEG Hypoxia_Pos	15	ITGB2
		GSK3B
		SLC25A30
		CDK13
		CHCHD2
		SOX4
		RGS5
		MED12
		GNA13
		RCOR1
		TMEM70
		MAML1
		PRRC1
		HSPA13
		2200002J24RIK
3D_DEG 3D_Pos Hypoxia_DEG	21	SPTBN1
		ANKRD49
		RBPMS
		NF1
		NCOA1
		ATP2B4
		SMAD3
		FRMD6
		DRG1
		P4HA2
		MIB1
		SLC7A3
		RB1
		BASP1
		MYH9
		NUDT14
		BCOR
		PTPRS
		PLXNA2
		CASK
		ECSCR
3D_Pos Hypoxia_DEG Hypoxia_Pos	1	PIP4K2B
3D_DEG Hypoxia_Pos Normoxia_Pos	1	CS
3D_DEG 3D_Pos Normoxia_Pos	1	ANXA3
3D_DEG 3D_Pos Hypoxia_Pos	1	STK40
3D_Pos Hypoxia_Pos Normoxia_Pos	4	CDKN2A
		ITGB1
		VGLL4
		CBLB
3D_DEG Hypoxia_DEG	2020
		CLMP
		CREB3L1
		ABCA3
		HAUS2
		FARP1
		DPY30
		CMTR2
		TUBD1
		ZHX3
		APBB2
		GCSH
		ZFP182
		PFKP
		NAPRT
		ESYT1
		SUMO1
		TMC4
		UQCR11
		HIST1H4J
		CENPQ
		PBLD1
		COPRS
		KBTBD8
		ZEB1
		PNPT1
		CHD9
		STK16
		SEMA4D
		PDLIM2
		IGSF3
		PPCS
		LONP1
		MED13L
		PTCD3
		NFIA
		TEAD1
		SORL1
		SLC25A14
		AL731706.1
		SERPINF1
		MAPKAPK2
		NMNAT1
		DIP2A
		FAM129C
		TRIQK
		GRPEL1
		SNX16
		BBS12
		RNF32
		COL1A1
		PRDM2
		TRAF5
		CEP350
		LTBP4
		STARD5
		PPIL1
		DNAJC15
		TAFA2
		GM12166
		GM21985
		CCL9
		CHRAC1
		ALX1
		PODN
		ROR2
		ZBTB48
		TM4SF4
		BUD31
		CORO2A
		APOE
		ORM1
		HIST1H2AD
		F2RL1
		TRAPPC9
		BCL2
		ORC1
		KNG2
		EMILIN1
		NDUFS4
		COL18A1
		SF3B6
		SEC1
		CELA1
		EMC8
		CDC42BPA
		CNOT1
		SPX
		PRR22
		IRS1
		IGSF11
		GM4724
		NCAM1
		FERMT3
		GLIS2
		KDM4B
		SPG20
		ZFP773
		GLG1
		GM20425
		EPHA4
		L2HGDH
		MRPL15
		SELENOP
		ZBTB20
		SPACA6
		CENPX
		WASHC5
		COMMD5
		DCUN1D5
		OSBP
		ALDH1L2
		DOCK11
		SMTNL2
		CATIP
		BST1
		PIGF
		AHNAK
		IL18BP
		HEATR5B
		LPIN3
		AHR
		MAD2L1
		VSIR
		ELFN1
		SORBS2
		AKR1C14
		KLF4
		IFITM10
		HP
		SLFN4
		MRPL57
		IDS
		ATP7B
		RAB38
		OTOA
		VMP1
		MRPL41
		ATP23
		TNRC18
		DNAJC9
		JUND
		FETUB
		DCTN1
		GM12258
		NDUFB8
		R3HDM2
		PTCRA
		PREX2
		ZFP518B
		KLF2
		VMN1R43
		TANC2
		TFE3
		PGM1
		CPD
		SSMEM1
		DLGAP1
		NAB2
		H2-DMA
		LGR5
		TM9SF4
		GM12355
		AKAP2
		XAF1
		ZFP968
		RAB15
		PLA2G4C
		ZFP977
		EMC9
		THOC7
		CCDC162
		EHD2
		GM14434
		AGER
		GABRE
		TRIM56
		ELF4
		PPCDC
		NT5E
		FAM129B
		NEURL3
		ZFP944
		MEX3D
		NUDT22
		GM14419
		MSS51
		TYMS
		FAM199X
		ECHDC3
		IL15RA
		ZFHX2
		YPEL1
		GEMIN6
		FBXL5
		JAGN1
		HPRT
		EPB41L3
		TEKT2
		ERH
		DDIT4L
		CSRNP1
		LAMA1
		SETBP1
		MME
		VAT1
		CAVIN2
		EEF2K
		ZFP991
		MYC
		OIP5
		1700029I15RIK
		DNASE1L1
		MRPS18C
		ARID1B
		EPN1
		VCP
		SLC35A1
		SRSF3
		PIGT
		FOXO1
		DUSP10
		CCDC28A
		PKP2
		AMPD3
		PYURF
		9930012K11RIK
		CTDP1
		SLIT1
		BLVRB
		GM14410
		MKKS
		CFAP74
		TRIM6
		CD109
		MRPL22
		2010315B03RIK
		ADAMTS12
		ARHGAP8
		ATG4A
		TBC1D16
		PLXNA4
		ASPN
		VNN3
		ARHGDIB
		ITGA10
		STK24
		ZFP951
		BOD1L
		GM14393
		MRM2
		METTL18
		CCDC103
		ZFP626
		AI467606
		RMND5A
		EXOC3L4
		IMPG2
		ZDHHC1
		LRRC32
		ZFP300
		F13A1
		KRT80
		PIK3C2B
		AKR1C13
		HACL1
		HAUS1
		CTNNA1
		CNTD1
		NDUFB7
		FOXN3
		AGRN
		GOLGB1
		KRTCAP3
		CHD7
		CLIC4
		LRP1
		BIRC6
		ADHFE1
		PTBP3
		CDON
		SERPINI1
		HDHD3
		SNX18
		RAB2B
		NDRG1
		TNPO1
		MRPL13
		MRPL46
		AFAP1
		PACS1
		MSRB2
		BCR
		PUS3
		CAPN2
		LRFN1
		RMDN1
		2210408I21RIK
		NEO1
		GLT8D1
		DHX38
		DBI
		2310022B05RIK
		GUCY1B2
		APOOL
		SMARCA4
		RNF152
		FAHD2A
		ZFP961
		PALMD
		PRPF8
		SH3D21
		TIMM23
		SKI
		CCDC17
		TBL1XR1
		KRT16
		UBE2O
		TMEM126A
		FBLN2
		CPEB4
		VMN2R29
		CAMSAP2
		GM3636
		ABL1
		PTPRG
		NCOR1
		PAKAP
		BRDT
		UBE2H
		CCNE2
		TBX3
		TAZ
		ZFP719
		ERBIN
		RAD50
		GIMAP9
		MTHFD1L
		PSMD10
		APLN
		GUF1
		CDK7
		CD1D1
		WDR27
		MED21
		ZBTB10
		BHLHE40
		MCC
		RAB22A
		PTPN6
		BAHD1
		PLXNB2
		GAS2
		CCDC85C
		MAP3K4
		KNG1
		UNC50
		RUNX2
		SDC3
		MSMO1
		GM4841
		PTGES2
		SLC35G2
		MED31
		LBHD1
		VCAN
		MED12L
		ARG2
		LEKR1
		FBXL16
		ADAM8
		MAN2B2
		TOMM5
		GM17655
		ALKBH5
		JUP
		CHP1
		MAMDC4
		ACAP2
		KIF3A
		PTGFRN
		NBL1
		MROH3
		RAB11FIP5
		CLEC2D
		CUL7
		SLC6A12
		PATJ
		MGAT3
		MAGOH
		ZFP516
		SIM2
		HELZ
		SLC46A3
		TET1
		PTRH2
		CENPI
		TTC14
		SARNP
		SH3RF1
		FNDC3B
		MTCP1
		METTL7A1
		LMCD1
		GM35315
		SWI5
		CENPK
		CAV2
		ATRNL1
		NDUFB2
		OVOL1
		ASF1A
		HARS2
		DCHS1
		SYCE2
		ADNP
		PDCD1LG2
		SUPT6
		GM14327
		LY9
		RAB10
		ZFP870
		ZBTB7B
		SDF2L1
		ANO3
		PSMA6
		CNTNAP5A
		T2
		COL11A1
		HIST1H1D
		UBAP2
		CDKN2AIPNL
		ACTN1
		CYB5A
		BBIP1
		N4BP2L1
		ZFP455
		DENND6B
		CAR8
		DOCK7
		TPR
		HIST1H4A
		KRBA1
		DYNLT1F
		MYO1D
		BMP2K
		SAMD4B
		WNT7B
		R3HDML
		FLT4
		FKBP11
		FLII
		ZFP958
		NARS
		AP2A2
		SMAP2
		MAP7D1
		RMND1
		TMEM208
		UBR4
		RNASE4
		RRAGB
		COL12A1
		RPP38
		RYBP
		ABCA13
		ISCA2
		HDLBP
		DOC2G
		ARL6
		HECW1
		1700109H08RIK
		SOAT2
		RAP1GDS1
		LZTS2
		CCDC51
		QK
		BAIAP2L1
		GMPR2
		ATOX1
		ARHGEF10L
		KANK1
		MAP4
		KIF26B
		LPP
		HIVEP1
		DFFB
		CTLA2A
		MACF1
		SEC24D
		TGFB2
		CHRDL1
		ADD3
		MBNL2
		ADGRB2
		TRIO
		RENBP
		CLHC1
		SMARCC1
		HIST2H4
		DNASE2A
		ZFP820
		DSP
		NDST1
		TPD52L2
		PTPRE
		UNC5B
		FAM20A
		FBXW8
		GM49396
		ZFP106
		TPP2
		JAM3
		GPNMB
		TCIM
		CRYZL1
		MECP2
		PSMA1
		DIP2C
		PDLIM7
		TIMP3
		HRK
		NFATC1
		DGKH
		ZFP386
		PLCG1
		NEDD4
		C330018D20RIK
		KRT13
		MRPL19
		USP17LB
		DPH3
		THYN1
		PAFAH1B1
		MAGEE1
		CTIF
		TBC1D5
		GM4787
		MYO6
		ZFP930
		TMEM223
		MRPL33
		E130308A19RIK
		GM2237
		4930522L14RIK
		HBEGF
		PI4KA
		MRPL12
		COMMD2
		WIZ
		DDAH1
		SLC35B2
		CRYAB
		LY6G
		LRRC58
		COPA
		ARFGEF3
		PARVA
		PTHLH
		PRKG2
		SH3GLB1
		GNG10
		44449
		CTSW
		MRPL28
		HDDC3
		NIPSNAP1
		CHD3
		HMCN1
		ZFAND4
		RNF145
		EFCAB7
		CLDN2
		PRDX1
		SIRT4
		ARHGAP4
		RSKR
		OVGP1
		OLFR1369-PS1
		WDR5B
		AEBP2
		CBR4
		SMC1A
		CCL7
		NDUFB4
		BCL9L
		ZFP708
		0610009B22RIK
		1110059G10RIK
		SHCBP1L
		CROT
		RDH5
		EFNB3
		PROKR1
		MSI1
		DYRK2
		PCNX
		HUWE1
		SMIM8
		ZFP395
		UBR5
		LEF1
		MRPS7
		RNF225
		GM28710
		ANXA6
		ABTB2
		AP2A1
		ORM3
		COL6A2
		RAPGEF1
		P2RX6
		CCDC32
		STC1
		KLHDC8B
		NAA20
		FMC1
		EGR2
		MED11
		GM45062
		FKBP10
		VLDLR
		LARP1
		ITGB6
		VIM
		SAMD8
		44264
		ABCC3
		SAMD9L
		MRPL20
		EGLN1
		RWDD3
		D930048N14RIK
		GM14391
		STAT3
		SYNJ2
		FAM83E
		MBD4
		GID4
		ARSB
		3110001I22RIK
		UBA3
		MPP2
		TNK2
		DENND4A
		NDUFA4
		GM14308
		ANKRD11
		PLPPR3
		NT5DC3
		CSTAD
		ZFP943
		LY6A
		ZFP85
		CHCHD1
		HK1
		CDC26
		SFMBT2
		UACA
		TNKS
		SLC35G1
		GM10131
		CRLF1
		RBX1
		PYCR1
		H2-M3
		PRRC2C
		TRMT13
		ARRB1
		LRRC15
		DCAF7
		MCAM
		PCDHGB2
		AQR
		MAP7D2
		GM28042
		CLMN
		TNS1
		TOM1
		MRPL50
		44448
		PRUNE2
		ATG13
		CINP
		SLC35B3
		ZFP729B
		NFIC
		QPCT
		SUN2
		GPI1
		H2AFZ
		UBE2B
		CCDC30
		TAGAP1
		GM10778
		PLOD3
		UROS
		GM37240
		LEMD3
		PRXL2A
		MGMT
		PIEZO1
		DIMT1
		SPAG4
		LASP1
		ARHGAP23
		INSYN1
		ATG9B
		SKA1
		6430550D23RIK
		ERG28
		AW209491
		PTBP1
		BC024063
		CDC7
		SEC31A
		GLRA3
		VPS8
		TMEM94
		CXCL15
		INAFM2
		DHRS9
		TGDS
		CASP3
		ZFP236
		HSD3B7
		XPR1
		ZFP609
		GM4767
		AGO1
		PSMA2
		RGS2
		CREB3L2
		COL3A1
		GLIS1
		GTPBP8
		ARHGEF11
		UHRF1BP1
		DPT
		DUSP19
		FOSL2
		GRB10
		CLSTN1
		EEF2
		MOV10
		EDIL3
		NPFF
		AOPEP
		OSTC
		SLU7
		RCCD1
		GM20518
		ZFP975
		KLHL33
		PLCG2
		CDYL2
		PTGDS
		MRPL3
		POMP
		BMPR2
		KLF7
		TIMM9
		LGMN
		ZFP456
		HIVEP2
		PYGL
		MTA3
		TAF13
		NUBP1
		SHLD1
		FAM136A
		NFIX
		DIP2B
		BCORL1
		LY75
		PRORSD1
		DNMBP
		SP1
		APOBEC1
		GINS4
		PPME1
		HCN2
		EFHB
		CKLF
		ORMDL2
		SYK
		GGT7
		KIFC2
		GDPD3
		PTPN21
		IQGAP1
		MYCBP2
		ZFP964
		WIPI1
		TMCO4
		FDXACB1
		SPOCK2
		RNF144B
		GM5141
		HTATIP2
		PAMR1
		PABPC4
		DDX6
		GM3448
		NTN1
		IDI1
		ZFP938
		AKAP9
		ADAM1A
		IGF1R
		CAV1
		PCM1
		RNASEL
		AEBP1
		ELOF1
		GM2115
		MSI2
		PLEC
		NCAPD2
		ANK1
		DCP2
		ASNS
		GIN1
		C1D
		EPM2A
		SPNS3
		MXD3
		MON2
		H2-AB1
		UBE4B
		GM49391
		CHD4
		IKBKE
		GM32687
		BEX1
		COMMD3
		WNK3
		KIF18A
		SLC41A2
		KHSRP
		1700092M07RIK
		KCNIP4
		CAMK1D
		RTP4
		FLRT2
		NFATC2
		NAT8F1
		SLC39A2
		ERF
		GCNT4
		1110012L19RIK
		OTOGL
		CYREN
		ZFAND3
		ZSWIM5
		IFI35
		TLR4
		DIPK1C
		DNASE1L2
		HIST4H4
		GBP3
		TMEM128
		DPEP2
		MBIP
		TSPAN6
		MPP3
		SMG6
		MSLN
		MARK4
		GM10767
		CBY1
		CIB1
		1500011B03RIK
		IFI204
		AMOTL1
		ABRAXAS1
		TOMM40L
		ZFP362
		CHD5
		CACYBP
		JAK1
		TEDDM3
		ITGA9
		ACSL6
		QSER1
		KCNB1
		LYRM4
		HIPK2
		MTRF1
		CASC1
		PABPC1
		COL6A3
		USP22
		TMEM126B
		ZFHX3
		HEMK1
		ZFP273
		EFNA3
		CUX1
		CKAP5
		SMIM15
		MTERF1A
		AIM2
		KYAT3
		SLFN5
		POP5
		MTERF1B
		COL6A1
		FOXD1
		AMT
		A630023A22RIK
		RASL11A
		RLIM
		KCTD12
		UBE2V2
		BOLA1
		COL5A1
		SFT2D1
		ADAM22
		CFP
		CNIH3
		MAP4K4
		GTF3C1
		PAQR9
		THSD4
		KIF21B
		KPNB1
		PEG10
		FOXO3
		GNGT2
		IFT20
		GPC6
		PLA2G4B
		DNAJC24
		WNK1
		GSDMD
		AHNAK2
		CARMIL2
		MFHAS1
		GM8113
		HAS1
		SSBP1
		ACOX2
		COA3
		LHX2
		CSF1R
		NOTCH3
		PTH1R
		RBP1
		HIST1H4C
		ESPN
		RBM43
		CRKL
		ZFP57
		TENT5A
		CDKN3
		MPG
		GM4951
		GABRA3
		SH2D5
		CHCHD4
		ADCY9
		WHRN
		GOLGA4
		3110082I17RIK
		BC028528
		NPC1
		INPP5A
		SUSD1
		MTERF2
		NPTXR
		DPYSL3
		GPC1
		PAK2
		APP
		ZFP652
		WASF2
		CDK10
		HLX
		6720489N17RIK
		CBR1
		ITPR3
		ZFP953
		APBA1
		ACTN4
		PLCE1
		INSL3
		TNIP3
		PIGX
		ZFP874B
		CNBP
		PDF
		AHDC1
		TMEM151A
		ITPK1
		TMEM139
		PAK1
		ZFP867
		C1RL
		TLN1
		B9D1
		GYS1
		ZFP760
		PADI1
		SH3BP4
		PON3
		USP47
		TRIM33
		IZUMO4
		ATG4A-PS
		FGFR1
		GM20683
		SPN
		BBC3
		RCL1
		BET1L
		FRY
		2210418O10RIK
		PCYT2
		TANGO2
		SAAL1
		HERC2
		GM45871
		LIMS2
		GINS1
		CAND1
		UTRN
		CNN1
		PALLD
		RWDD2A
		ZFP965
		TENM4
		ASB13
		ZFP14
		2610008E11RIK
		CCN4
		PPP3CA
		DDB2
		TSPAN13
		GM49405
		SPTSSA
		DYSF
		GOLGA3
		DHRS7
		HIST2H2BB
		ITGB1BP2
		TRUB2
		ALDH18A1
		CEP170
		TPI1
		DNAJC5
		HECTD2
		C3
		MAPK12
		POLR1E
		RNF217
		DNM1
		DYNLT1C
		ATOH8
		KBTBD3
		FAM98B
		SPPL3
		NFKB2
		NUP37
		PATE14
		BARX2
		TASP1
		DDX39
		GUCA1B
		ATPSCKMT
		LDHB
		GM20605
		GMFG
		PRRC2B
		LTBP1
		SMAD9
		TRIP12
		MBD5
		ERO1L
		PSMC3IP
		RASSF5
		PCDHGA1
		EZR
		TMEM14C
		PALM2
		DYNC1H1
		CLSTN2
		CALHM5
		POU6F1
		ZFP51
		MOB4
		NBR1
		PKHD1
		HIST1H1A
		DRAM2
		PIGP
		ADAMTS2
		PJA2
		TLE2
		MGST1
		FXN
		ZFP292
		SPG11
		GM6710
		ZFP661
		RPP14
		PCDHB18
		FN1
		PXMP2
		DHFR
		ASH1L
		PPP1R12A
		SERTAD2
		ATP1A1
		UBQLN2
		NT5C3B
		HNRNPUL2
		GAA
		GNAO1
		GM3055
		AY074887
		PFKL
		MITD1
		ECE1
		FAM189B
		BMP6
		HPF1
		IFI203
		LAMB3
		CCDC6
		RASSF4
		CLDN9
		S100A3
		GM14295
		PFKFB1
		MOSPD1
		PXN
		PHYKPL
		TNFSFM13
		HNRNPA0
		AMMECR1
		SEC13
		ZFP469
		VSIG1
		AGO2
		TRIL
		DSTYK
		B230307C23RIK
		NAIP6
		ZFP68
		1810009A15RIK
		FNTB
		C1GALT1C1
		SVIP
		ANTXR1
		HRCT1
		LRR1
		FUOM
		TRABD2B
		GNS
		PHOSPHO2
		ENO2
		LRP5
		ADAMTSL4
		ARFGEF2
		COX7B
		WNT9A
		ANKRD17
		DND1
		HAS2
		DNMT3A
		GM20521
		ORMDL1
		BAG3
		SGK2
		LRRC61
		PIK3C2G
		PRKDC
		XLR3A
		TOGARAM2
		PDCD6IP
		EXOSC3
		AP2B1
		SYT7
		BC003965
		NUDCD2
		DNA2
		FMOD
		NARFL
		ANAPC1
		NFATC3
		FASTKD2
		PRKACB
		SAYSD1
		RASGEF1A
		SPRYD7
		FLYWCH2
		DRP2
		ENPP2
		PIK3CD
		SLC7A11
		ACAN
		MAIP1
		SHISA8
		UXT
		TINAGL1
		SLC31A2
		SLC5A3
		DHRS7B
		MCTP2
		AU041133
		WDR38
		S100A16
		PLS3
		DAG1
		GM14322
		PTPN9
		PLOD2
		KLF9
		NUF2
		EEF1AKMT1
		IFI47
		PDK4
		TRMT11
		ELL3
		RHBDL1
		ARGLU1
		B9D2
		CAR9
		IGFBP5
		ZFP606
		ANAPC10
		MMP12
		LIX1L
		TNFSF13
		IRF2BPL
		ZFP574
		SLC2A1
		ATP2A3
		MICOS13
		CXCL17
		PLXND1
		PRDM1
		BBX
		FN3K
		TNRC6B
		BNC1
		FGFBP1
		LINGO3
		CYTH4
		OLFM2
		MYO1E
		ATP5K
		NUP35
		CCDC167
		KLHDC8A
		IFT74
		VPS29
		PNISR
		2610044O15RIK8
		INSL6
		HERC1
		DOCK1
		MTUS2
		SKP1A
		COL9A3
		ZFP59
		CNN2
		SOGA1
		COL5A3
		WDTC1
		COL4A2
		KDM5B
		PPP1R13L
		TCF7L1
		GFPT1
		GGACT
		H3F3A
		EGFL8
		WDR61
		CD302
		NECTIN1
		FLT1
		XLR3B
		ZFP932
		PPIL3
		MKNK2
		EFNA5
		YWHAG
		FCGRT
		TMEM68
		PPIH
		IGF2BP2
		EIF5B
		CENPE
		PLD2
		IL17RD
		SASH1
		PIGH
		PHC1
		LY6C2
		SRSF7
		HECTD1
		INSM1
		TLN2
		FOXC2
		PCLAF
		TEP1
		ROMO1
		KIDINS220
		FNIP2
		SAG
		MSH4
		GM42688
		POSTN
		GTF2A2
		EID1
		DHX8
		OXSM
		ZFP777
		UBE3B
		EIF3A
		COA4
		LVRN
		BLVRA
		SEC24B
		SDHAF2
		FSCN1
		AKAP6
		CBR3
		CTLA4
		TTC39A
		WNT2
		GLMN
		1700066B19RIK
		ARHGEF28
		TYW5
		PLCD1
		RAB3GAP2
		CLCN1
		RIOK2
		SLC2A6
		NAT2
		TENM3
		DTYMK
		WDR7
		SLC25A27
		ADAM4
		ZFP781
		IARS
		AP1B1
		PLSCR1
		ZUP1
		MGST2
		LAD1
		KCTD11
		GM14305
		WNT11
		ATP5J
		CBX7
		MED13
		SCN1B
		PHF2
		RFC1
		TRNT1
		AFDN
		SP2
		SMPD3
		NFE2L1
		MTFP1
		SYT8
		COPS3
		ZFP53
		HYLS1
		STRA6
		MPP5
		SUSD4
		DYNLT1B
		SMIM6
		ALOX8
		ANKLE1
		NSMCE1
		MPV17
		ZFP617
		COL16A1
		CELF2
		HIST1H2BK
		SRC
		NTNG1
		VASN
		MAPRE2
		KIF13A
		RPA3
		RABEPK
		RAD51AP1
		SMTN
		GM15446
		ENO1
		COL4A1
		MKI67
		KANK2
		THA1
		NAV3
		MNT
		ATP6V1G2
		SPAG1
		TM4SF1
		EMILIN2
		ANKRD13A
		PLGRKT
		ZFP873
		FAM71F2
		LAMB2
		HNF1B
		RPS27L
		TATDN3
		GM29666
		4930590J08RIK
		ATP6V0A1
		RIPPLY1
		GTF2I
		A430005L14RIK
		PTPRM
		ATXN1
		ZFP119B
		CTNND1
		1810062G17RIK
		ALG5
		NCOA2
		ABCA2
		MESD
		RASSF8
		GUK1
		44447
		ADM
		DLC1
		PRKACA
		ETFB
		ELMSAN1
		TRPV3
		IDH1
		ZFP503
		ABCC1
		TMEM167B
		PLEKHG1
		SP8
		IGF2R
		NHSL2
		1600002K03RIK
		KLHL11
		5730480H06RIK
		SNRNP200
		ORC4
		MTIF2
		KLF13
		CLEC11A
		FAM117B
		DLK1
		CERS6
		ELMO3
		SPRR2A2
		COL8A2
		PHB
		WDYHV1
		GM29609
		POU2F1
		GAPDH
		APC
		TLR2
		CTLA2B
		DHX58
		PIGC
		MMP19
		SGK3
		GCN1L1
		AMOT
		TMTC1
		ERGIC2
		HGFAC
		SPTSSB
		BACH2
		TMEM88
		PPP2R3A
		HAP1
		ACTG1
		NME1
		PRR9
		SIK1
		HGS
		KAT7
		AKR1C18
		EDEM3
		GJA5
		EVL
		HGF
		SYNGR1
		CLCA3A1
		PDE4A
		SCD2
		GINS2
		SPC24
		CKAP4
		PLOD1
		NAT14
		COBLL1
		NRADD
		NBAS
		MYO1B
		WASL
		ZFP54
		MFSD4B3-PS
		SETD2
		TIA1
		PKP1
		SYNE2
		TRIM23
		DPYSL2
		GK
		DUSP7
		ZFP618
		LYRM2
		RC3H1
		FBP2
		RFC3
		FAM129A
		9030025P20RIK
		ILF2
		CROCC
		PSMA3
		D630023F18RIK
		ASCC3
		ACYP2
		ACTL6A
		CLDN4
		DNAJC22
		PKD2
		TMEM18
		EPHA2
		TCHH
		ACAT1
		MEOX1
		CMIP
		SERPINB9B
		KDM5C
		CALML4
		ZFP995
		FBN2
		ATP8B2
		MIS18A
		GEMIN8
		SH2D1B1
		AMN1
		LPGAT1
		DACT3
		ZFP472
		TGFBR3L
		GSTA4
		MGST3
		IIGP1
		TEFM
		44444
		SEMA3E
		JTB
		REST
		CEP170B
		MYO5B
		ACOX1
		MTHFSD
		FOPNL
		USP24
		MRPS17
		LRRC17
		ZFP947
		EFHD1
		AICDA
		ELF3
		NUDT7
		DCLK1
		MEF2A
		TRIM30D
		SLC4A3
		CAMK2D
		CCDC122
		FAM216A
		CLP1
		APOB
		NRIP1
		TRO
		NRP2
		PTPRB
		ARID5B
		FLNC
		SIPA1L2
		SPTAN1
		NOTUM
		AU040320
		BBS10
		JAG1
		ZFP433
		NT5C
		LSM10
		CACNG4
		SMAGP
		FOXO6
		TGTP1
		ECM1
		OGG1
		DYM
		APLP1
		AFP
		4930452B06RIK
		PBRM1
		UHMK1
		BICRAL
		EGFL7
		IFIT2
		S100G
		DYNLT1A
		GM49378
		ACTR6
		AGO4
		TCEA2
		TARS
		ARHGAP28
		RCOR2
		FBXW4
		RNF227
		STEAP4
		FES
		ZFP72
		TRIM12A
		STAC2
		LRRC29
		MYOF
		AFF4
		SUB1
		PRL2C2
		RAMP1
		ZFP101
		PDE8A
		SELENOF
		SH3KBP1
		SMAD7
		9430038I01RIK
		AVIL
		TRP53BP2
		NUDT6
		ZFPM1
		AI987944
		S100A14
		ITGAV
		ASPA
		ACRBP
		DUOXA1
		ATG5
		AVPI1
		EPRS
		HR
		CPT1B
		CENPS
		MPP1
		CCL20
		PEX7
		AC115631.1
		MYH10
		THOC1
		PRKX
		ARG1
		KBTBD11
		MEGF8
		MRPS22
		DRAM1
		TTC32
		RGCC
		CRIM1
		FLNB
		5430403G16RIK
		MTIF3
		ATF5
		ZFP970
		LAT2
		HNRNPUL1
		PKNOX1
		GM7879
		SFRP4
		ZFP672
		TPRG
		CISD2
		TNFAIP8L1
		FAM155A
		GM45844
		COQ3
		RRBP1
		VDAC1
		PPIA
		TJP1
		MED6
		CD46
		RALGDS
		ZKSCAN4
		DQX1
		DNAJC12
		JCAD
		MRPL17
		CXXC5
		ANKRD24
		PTCH1
		S100A6
		TINF2
		COX19
		ZFP934
		VPS13A
		SPRR1A
		OSBPL6
		SH3TC1
		RAB36
		FMO1
		FBN1
		ZFP462
		TBL2
		MAP3K1
		GAB2
		LAMA5
		ZFP950
		DIS3L2
		GM11639
		EFCAB3
		FUZ
		CCL2
		AGAP2
		LAMC1
		ADA
		CLASP2
		CLTC
		PDCD10
		XNTRPC
		SNAI3
		NXT1
		PSME4
		RAN
		CCDC114
		PSMD14
		KDM3B
		FOXK1
		RPF2
		LSM7
		ANGPT2
		CCDC68
		ATP6V0A4
		PHLPP1
		ZKSCAN17
		BAG6
		SH2D4A
		EIF4B
		RBKS
		SEC23A
		PSMA4
		BLOC1S1
		PTPRK
		ZC3H13
		TK1
		SMIM4
		AKR1B3
		ZFP825
		MSL2
		ZFP808
		MMP28
		CCDC84
		HIST1H1B
		SLC25A47
		TMEM45B
		DENND5A
		NUP98
		NIP7
		RARA
		ANKRD16
		TNC
		SOCS7
		PDE2A
		AGBL3
		LRP6
		AFF2
		ZYG11B
		MN1
		RORA
		PTPRD
		PNRC2
		PLK2
		PSMG3
		SMURF1
		LYRM9
		PRIM1
		ANKRD39
		AFAP1L2
		S100A4
		LIME1
		MYO1A
		NUP188
		PPEF1
		PLCB1
		MTG2
		LAMB1
		BPTF
		ADM2
		SLFN2
		SERPINA7
		EPN3
		XPNPEP1
		JKAMP
		DNMT1
		CDK5RAP1
		RAP1B
		RNF26
		WIPF2
		SBF2
		SLC7A5
		FOXRED2
		AK4
		ZFP160
		GM14418
		KREMEN1
		CYGB
		CBL
		KCNAB2
		NUTM1
		ZFP874A
		ZDHHC9
		TTC28
		TSEN2
		SAA3
		MAP3K2
		JMY
		SYMPK
		POLE2
		GM35339
		CACNA1A
		ALDH3A1
		TEX22
		ENY2
		DOK3
		PTGR1
		EMC4
		SSH1
		CAD
		GNPNAT1
		GM3839
		AMH
		ACAT2
		RPAIN
		COL2A1
		RAB29
		SPIRE1
		HK2
		CIAO2A
		TGTP2
		MICAL2
		GEMIN7
		MTRF1L
		DNPH1
		ANKRD50
		GM14326
		RAPGEF3
		JARID2
		USP34
		PRR18
		APLP2
		CELSR1
		GM42791
		CHRND
		GTPBP10
		CTBS
		A230050P20RIK
		ZFP763
		GATB
		TTYH2
		TMEM131
		NOL6
		SORD
		SLC25A33
		2610528A11RIK
		EIF3C
		SDHAF4
		KIF1C
		TRIM39
		SIDT2
		TMEM231
		TRIM32
		PTS
		EID3
		TGFA
		DDX54
		TTLL3
		LNX2
		ZEB2
		MGAM2-PS
		GM4924
		PET100
		PRRC2A
		NR1H4
		ZFP322A
		NDUFAF5
		RUSC2
		PDE11A
		NSRP1
		TMEM17
		TSPAN9
		CYP26B1
		AQP5
		GBF1
		VCL
		HFE
		MAP1B
		AKAP5
		BRWD3
		PRPF38A
		ACTG2
		PLATR25
		GNA14
		SMIM20
		2210016F16RIK
		CRTC3
		GALE
		PLLP
		SRGAP3
		LMTK3
		AKAP13
		RNF121
		ETFBKMT
		MTSS1
		TSACC
		HTRA2
		SARDH
		3300002I08RIK
		DENND4C
		PKM
		PSMD13
		FAM227A
		HDHD5
		CXCL5
		BTBD7
		S1PR5
		PITPNM3
		CETN2
		LSM1
		P2RX4
[truncated: 5,207 more rows]

## Sheet: hypoxia and 3D selective in DEG
3D_DEG 3D_Pos	20	RUNX3		Hypoxia_DEG Hypoxia_Pos	14	GTF2H5
		JRK				SPDYA
		NIPA2				FAM71E1
		RAB32				CHPF
		PDHX				ACACA
		DET1				CYP51
		SOCS5				NUAK1
		TEX261				PPOX
		SMAD4				ATP9A
		APH1A				SLC25A20
		4930523C07RIK				INSIG1
		PDHA1				NDUFA6
		PQLC2				FASN
		TGFBR3				STOML2
		GALNT1		Hypoxia_DEG Hypoxia_Neg	13	PDGFRB
		MEF2D				RPL27
		TSC2				COMMD6
		THUMPD2				COX17
		PMM2				TOMM20
		METTL3				CAML
3D_DEG 3D_Neg	20	TSEN54				MRPL54
		MED26				GET4
		GNB1				MRPS33
		RNASEK				CYC1
		CCDC137				ESD
		SKP2				ZSWIM7
		SAP30BP				FOXP1
		SPRR2K
		NADK2
		TKT
		TUBA1A
		MED25
		PAXBP1
		PHF23
		ARF1
		WDR24
		FERMT2
		PRPF18
		SART3
		HEATR3
